# Supplementary material
Source: Research Square preprint supplement (doi:10.21203/rs.3.rs-9239420/v1)
Supplement: Supplementary file 1 [file 05fd0e50dc399ab059f7d611.xlsx]

## Sheet: Sheet1
													Behaviour Test: Novel Objective Recognition
Subject Age	Subject Dosis	Subject Extra-Field	Subject Gender	Subject Genotype	Subject Group	Subject Name	Subject Phenotype	Subject Treatment	Exp. Code	Exp. Comments	Exp. File Date	Exp. File Date Last Modif.	Exp. File Name	Exp. File Time	Exp. File Time Last Modif.	Exp. Protocol Name	Experimenter	Trial Arena	Trial Comments	Trial Date	Trial Duration (HH:MM:SS,00)	Trial Name	Trial Phase	Trial Sample Number	Trial Sampling Time (Seconds)	Trial Session	Trial Time	Distance in Zone - Old	Distance in Zone - Novel	Distance in Zone (%) - Old	Distance in Zone (%) - Novel	Entries in Zone - Old	Entries in Zone - Novel	Fast Time in Zone (%) - Old	Fast Time in Zone (%) - Novel	Fast Time in Zone (Seconds) - Old	Fast Time in Zone (Seconds) - Novel	Latency 1st Entrance to Zone (Seconds) - Old	Latency 1st Entrance to Zone (Seconds) - Novel	Max Speed in Zone - Old	Max Speed in Zone - Novel	Mean Speed in Zone - Old	Mean Speed in Zone - Novel	Mean Speed w/o Resting in Zone - Old	Mean Speed w/o Resting in Zone - Novel	Min Speed in Zone - Old	Min Speed in Zone - Novel	Parallel Index in Zone - Old	Parallel Index in Zone - Novel
0	0		Male		Control	Control 1			NOR		2025-04-15	2025-10-25	NOR	15:29:53	12:02:17	Customized		Arena 1		2025-10-25	00:10:00.00	Trial 2	Phase 1	9600	0.06	NOR	09:11:12	151.77	299.83	1	1.97	20	30	1.03	2.05	6.19	12.31	26.06	21.25	93.52	67.8	19.74	21.6	19.74	21.61	7.62	5.26	-0.13	-0.14
0	0		Male		Control	Control 2			NOR		2025-04-15	2025-10-25	NOR	15:29:53	12:02:17	Customized		Arena 2		2025-10-25	00:10:00.00	Trial 2	Phase 1	9600	0.06	NOR	09:26:09	69.62	56.84	0.75	0.61	13	13	0.68	0.5	4.06	3	38.19	12.62	51.41	36.5	13.26	14.43	13.26	14.44	6.57	9.57	0.22	-0.1
0	0		Male		Control	Control 3			NOR		2025-04-15	2025-10-25	NOR	15:29:53	12:02:17	Customized		Arena 1		2025-10-25	00:10:00.00	Trial 3	Phase 1	9600	0.06	NOR	09:26:09	60.46	73.47	0.4	0.48	9	18	0.35	0.66	2.12	3.94	2.19	26.06	64.51	66.39	18.6	13.21	18.6	13.21	10.55	4.5	-0.24	-0.35
0	0		Male		Control	Control 4			NOR		2025-04-15	2025-10-25	NOR	15:29:53	12:02:17	Customized		Arena 1		2025-10-25	00:10:00.00	Trial 4	Phase 1	9600	0.06	NOR	09:39:19	18.68	96.33	0.14	0.74	8	18	0.17	0.83	1	5	14.75	56.19	34.69	59.14	11.53	17.14	11.49	17.12	7.03	9.44	-0.01	0
0	0		Male		Control	Control 5			NOR		2025-04-15	2025-10-25	NOR	15:29:53	12:02:17	Customized		Arena 2		2025-10-25	00:10:00.00	Trial 5	Phase 1	9600	0.06	NOR	10:04:53	4.67	4.72	0.03	0.04	2	2	0.06	0.06	0.38	0.38	213.44	482.69	31.69	46.29	12.29	12.42	12.45	12.58	16.68	26.73	0.98	1
0	0		Male		Control	Control 6			NOR		2025-04-15	2025-10-25	NOR	15:29:53	12:02:17	Customized		Arena 1		2025-10-25	00:10:00.00	Trial 5	Phase 1	9600	0.06	NOR	09:52:26	30.78	50.11	0.18	0.3	5	12	0.23	0.42	1.38	2.5	108.69	21.56	48.7	40.21	12.61	15.14	13.14	15.13	2.11	8.05	-0.4	0.03
0	0		Male		Control	Control 7			NOR		2025-04-15	2025-10-25	NOR	15:29:53	12:02:17	Customized		Arena 1		2025-10-25	00:10:00.00	Trial 7	Phase 1	9600	0.06	NOR	10:18:18	42.43	48.26	0.5	0.57	6	3	0.29	0.42	1.75	2.5	345.75	405	44.08	32.19	16.19	19.3	16.16	19.3	6.44	15	-0.45	-0.32
0	0		Male		Control	Control 8			NOR		2025-04-15	2025-10-25	NOR	15:29:53	12:02:17	Customized		Arena 2		2025-10-25	00:10:00.00	Trial 7	Phase 1	9600	0.06	NOR	10:30:33	48.94	128.88	0.36	0.95	12	29	0.27	0.8	1.63	4.81	61.56	23.63	53.05	61.58	15.99	14.23	15.98	15.16	8.77	0.69	-0.05	-0.37
0	0		Male		Control	Control 9			NOR		2025-04-15	2025-10-25	NOR	15:29:53	12:02:17	Customized		Arena 2		2025-10-25	00:10:00.00	Trial 8	Phase 1	9600	0.06	NOR	10:43:27	21.02	26.9	0.19	0.24	5	9	0.18	0.31	1.06	1.88	292.56	248.69	44.87	38.23	12.44	12.28	12.46	12.3	6.68	9.88	0.53	-0.12
0	0		Male		Control	Control 10			NOR		2025-04-15	2025-10-25	NOR	15:29:53	12:02:17	Customized		Arena 1		2025-10-25	00:10:00.00	Trial 8	Phase 1	9600	0.06	NOR	10:30:33	75.64	215.33	0.56	1.59	11	24	0.38	1.43	2.25	8.56	168.81	5.19	45.74	65.77	14.06	17.39	14.07	17.4	4.22	3.08	-0.23	-0.29
0	0		Male		Control	Control 11			NOR		2025-04-15	2025-10-25	NOR	15:29:53	12:02:17	Customized		Arena 1		2025-10-25	00:10:00.00	Trial 9	Phase 1	9600	0.06	NOR	10:43:27	50.28	78.09	0.37	0.57	8	12	0.36	0.51	2.19	3.06	41.31	67	40.19	44.94	20.61	18.64	20.63	18.65	11.35	6.96	-0.31	-0.05
0	0		Male		Control	Control 12			NOR		2025-04-15	2025-10-25	NOR	15:29:53	12:02:17	Customized		Arena 2		2025-10-25	00:10:00.00	Trial 10	Phase 1	9600	0.06	NOR	11:09:38	5.96	55.27	0.04	0.4	2	13	0.02	0.29	0.13	1.75	287.81	20.37	34.22	64.16	19.23	18.42	19.08	18.42	10.26	7.37	0	-0.07
0	0		Male		Control	Control 13			NOR		2025-04-15	2025-10-25	NOR	15:29:53	12:02:17	Customized		Arena 1		2025-10-25	00:10:00.00	Trial 10	Phase 1	9600	0.06	NOR	10:56:50	52.96	43.83	0.37	0.3	11	10	0.31	0.27	1.88	1.63	23.5	24.69	54.51	48.58	21.18	16.73	21.19	16.7	8.55	9.17	-0.09	-0.04
0	0		Male		Control	Control 14			NOR		2025-04-15	2025-10-25	NOR	15:29:53	12:02:17	Customized		Arena 1		2025-10-25	00:10:00.00	Trial 11	Phase 1	9600	0.06	NOR	11:09:38	52.5	58.27	0.34	0.38	11	9	0.44	0.38	2.62	2.25	17.63	37.69	67.46	57.37	17.86	19.42	17.87	19.42	13.29	6.21	-0.01	-0.13
0	0		Male		Control	Control 15			NOR		2025-04-15	2025-10-25	NOR	15:29:53	12:02:17	Customized		Arena 2		2025-10-25	00:10:00.00	Trial 11	Phase 1	9600	0.06	NOR	11:24:29	41.8	87.28	0.34	0.72	10	13	0.38	0.53	2.25	3.19	148.06	145.81	51.65	40.46	16.33	22.15	16.31	22.17	4.35	11.68	-0.31	-0.25
0	0		Male		Control	Control 16			NOR		2025-04-15	2025-10-25	NOR	15:29:53	12:02:17	Customized		Arena 2		2025-10-25	00:10:00.00	Trial 12	Phase 1	9600	0.06	NOR	11:37:01	89.97	71.47	0.67	0.54	21	13	0.77	0.42	4.63	2.5	90.13	139.31	86.12	30.6	14.85	16.82	14.84	16.82	7.14	7.76	0.02	-0.03
0	0		Male		Control	Control 17			NOR		2025-04-15	2025-10-25	NOR	15:29:53	12:02:17	Customized		Arena 1		2025-10-25	00:10:00.00	Trial 12	Phase 1	9600	0.06	NOR	11:24:28	163.56	340.91	1.37	2.86	17	25	0.85	1.78	5.12	10.69	134.06	109.69	63.83	83.16	20.94	19.35	20.94	19.34	6.76	4.38	0.11	-0.06
0	0		Male		Control	Control 18			NOR		2025-04-15	2025-10-25	NOR	15:29:53	12:02:17	Customized		Arena 2		2025-10-25	00:10:00.00	Trial 13	Phase 1	9600	0.06	NOR	11:49:23	3.56	22.48	0.03	0.18	1	12	0.03	0.25	0.19	1.5	288.37	84.63	39.25	57.45	18.74	12.42	18.99	12.4	31.43	7.48	0	-0.25
0	0		Male		Control	Control 19			NOR		2025-04-15	2025-10-25	NOR	15:29:53	12:02:17	Customized		Arena 1		2025-10-25	00:10:00.00	Trial 13	Phase 1	9600	0.06	NOR	11:37:00	107.02	96.45	0.69	0.62	18	16	0.6	0.75	3.62	4.5	19.5	10.06	49.1	67.05	19.25	18.37	19.24	18.37	9.59	8.43	0.09	0.2
0	0		Male		Control	Control 20			NOR		2025-04-15	2025-10-25	NOR	15:29:53	12:02:17	Customized		Arena 1		2025-10-25	00:10:00.00	Trial 14	Phase 1	9600	0.06	NOR	11:49:23	204.33	270.42	1.74	2.31	26	25	1.19	1.55	7.13	9.31	51	22.69	41.18	69.93	15.95	17.88	16.66	17.95	0	2.41	-0.15	-0.18
0	0		Male		shTrem2	shTrem2 1			NOR		2025-04-15	2025-10-30	NOR	15:29:53	11:50:46	Customized		Arena 2		2025-10-30	00:10:00.00	Trial 29	Phase 1	9600	0.06	NOR	09:02:56	109.71	157.82	0.35	0.51	13	19	0.48	0.68	2.88	4.06	180.44	106.81	78.23	94.74	38.09	38.31	38.16	38.26	29.02	13.68	0.1	0.25
0	0		Male		shTrem2	shTrem2 2			NOR		2025-04-15	2025-10-30	NOR	15:29:53	11:50:46	Customized		Arena 2		2025-10-30	00:10:00.00	Trial 30	Phase 1	9600	0.06	NOR	09:14:48	185.44	225.26	0.78	0.95	33	33	1.11	0.93	6.69	5.56	61.69	1.12	106.43	87.63	25.79	36.04	25.8	36.04	10.06	5.82	0.07	0.06
0	0		Male		shTrem2	shTrem2 3			NOR		2025-04-15	2025-10-30	NOR	15:29:53	11:50:46	Customized		Arena 2		2025-10-30	00:10:00.00	Trial 32	Phase 1	9600	0.06	NOR	09:41:17	230.27	162.68	0.79	0.56	28	17	1.33	1.06	8	6.37	9.63	1.44	78.86	62.35	22.6	19.86	22.6	19.87	6.25	6.38	0.04	-0.01
0	0		Male		shTrem2	shTrem2 4			NOR		2025-04-15	2025-10-30	NOR	15:29:53	11:50:46	Customized		Arena 2		2025-10-30	00:10:00.00	Trial 34	Phase 1	9600	0.06	NOR	10:06:16	155.82	135.47	0.58	0.5	18	21	0.97	0.73	5.81	4.38	14.38	5.44	108.66	77.89	21.88	22.14	21.87	22.12	6.2	6.08	0.05	0.09
0	0		Male		shTrem2	shTrem2 5			NOR		2025-04-15	2025-10-30	NOR	15:29:53	11:50:46	Customized		Arena 2		2025-10-30	00:10:00.00	Trial 35	Phase 1	9600	0.06	NOR	10:18:29	409.4	370.54	1.3	1.18	19	28	2.12	2.16	12.75	12.94	31.63	4.38	132.65	92.22	15.63	18.42	15.63	18.41	3.4	4.78	-0.09	0.11
0	0		Male		shTrem2	shTrem2 6			NOR		2025-04-15	2025-10-30	NOR	15:29:53	11:50:46	Customized		Arena 2		2025-10-30	00:10:00.00	Trial 36	Phase 1	9600	0.06	NOR	10:32:36	493.36	204.9	1.58	0.66	36	19	2.77	1.33	16.62	8	21.94	6.94	106.83	124.15	18.7	24.45	18.84	24.47	2.07	10.4	-0.21	0
0	0		Male		shTrem2	shTrem2 7			NOR		2025-04-15	2025-10-30	NOR	15:29:53	11:50:46	Customized		Arena 2		2025-10-30	00:10:00.00	Trial 37	Phase 1	9600	0.06	NOR	10:46:12	359.93	274.04	1.13	0.86	22	30	1.93	1.46	11.56	8.75	47.56	36	92.78	96.3	21.97	25.19	22.41	25.2	0	7.31	-0.04	0.14
0	0		Male		shTrem2	shTrem2 8			NOR		2025-04-15	2025-10-30	NOR	15:29:53	11:50:46	Customized		Arena 2		2025-10-30	00:10:00.00	Trial 38	Phase 1	9600	0.06	NOR	10:58:40	359.46	392.76	1.5	1.64	23	46	2.1	2.53	12.62	15.19	28	0	168.09	83.89	17.48	18.87	18.08	18.93	1.42	0	-0.09	0.15
0	0		Male		shTrem2	shTrem2 9			NOR		2025-04-15	2025-10-30	NOR	15:29:53	11:50:46	Customized		Arena 2		2025-10-30	00:10:00.00	Trial 39	Phase 1	9600	0.06	NOR	11:12:24	164.61	169.46	0.53	0.54	14	12	1.02	1.02	6.12	6.12	133.63	45.5	86.59	99.84	21.41	18.96	21.41	18.96	7.26	4.87	0.08	-0.02
0	0		Male		shTrem2	shTrem2 10			NOR		2025-04-15	2025-10-30	NOR	15:29:53	11:50:46	Customized		Arena 2		2025-10-30	00:10:00.00	Trial 40	Phase 1	9600	0.06	NOR	11:25:35	412.79	301.37	1.56	1.14	34	24	2.11	1.79	12.69	10.75	4.94	26.75	128.9	107.02	24.45	20.52	24.59	20.52	1.55	4.68	0.21	0.08
0	0		Male		shTrem2	shTrem2 11			NOR		2025-04-15	2025-10-30	NOR	15:29:53	11:50:46	Customized		Arena 1		2025-10-30	00:10:00.00	Trial 31	Phase 1	9600	0.06	NOR	09:14:48	44.86	35.26	0.13	0.1	5	5	0.1	0.07	0.63	0.44	5	28	119.05	100.49	72.35	80.14	71.78	80.59	78.82	79.37	0.77	0.98
0	0		Male		shTrem2	shTrem2 12			NOR		2025-04-15	2025-10-30	NOR	15:29:53	11:50:46	Customized		Arena 1		2025-10-30	00:10:00.00	Trial 32	Phase 1	9600	0.06	NOR	09:27:21	174.26	75.05	0.51	0.22	22	6	0.72	0.41	4.31	2.44	13.69	18.19	84	76.73	29.34	26.71	29.35	26.68	7.81	10.25	0.1	-0.04
0	0		Male		shTrem2	shTrem2 13			NOR		2025-04-15	2025-10-30	NOR	15:29:53	11:50:46	Customized		Arena 1		2025-10-30	00:10:00.00	Trial 33	Phase 1	9600	0.06	NOR	09:41:17	236.67	104.37	0.88	0.39	36	19	1.14	0.54	6.81	3.25	48.44	55.25	69.84	120.75	31.81	29.32	31.82	29.3	10.4	11.97	0.43	0.12
0	0		Male		shTrem2	shTrem2 14			NOR		2025-04-15	2025-10-30	NOR	15:29:53	11:50:46	Customized		Arena 1		2025-10-30	00:10:00.00	Trial 35	Phase 1	9600	0.06	NOR	10:06:16	226.51	237.7	0.83	0.87	23	15	0.93	1.52	5.56	9.13	192.31	117.31	111.92	113.44	15.1	20.46	15.1	20.45	2.84	8.37	-0.16	-0.15
0	0		Male		shTrem2	shTrem2 15			NOR		2025-04-15	2025-10-30	NOR	15:29:53	11:50:46	Customized		Arena 1		2025-10-30	00:10:00.00	Trial 37	Phase 1	9600	0.06	NOR	10:32:35	605.71	368.93	2.03	1.24	58	25	3.65	2.3	21.87	13.81	2.75	0.63	103.6	120.91	21.78	19.54	21.78	19.55	4.24	4.98	0.01	-0.05
0	0		Male		shTrem2	shTrem2 16			NOR		2025-04-15	2025-10-30	NOR	15:29:53	11:50:46	Customized		Arena 1		2025-10-30	00:10:00.00	Trial 38	Phase 1	9600	0.06	NOR	10:46:12	394.62	382.04	1.2	1.16	36	37	1.91	2.16	11.44	12.94	6.81	21.25	133.28	112.03	22.16	24.65	22.15	24.65	4.53	7.09	-0.13	-0.16
0	0		Male		shTrem2	shTrem2 17			NOR		2025-04-15	2025-10-30	NOR	15:29:53	11:50:46	Customized		Arena 1		2025-10-30	00:10:00.00	Trial 39	Phase 1	9600	0.06	NOR	10:58:39	353.95	554.92	1.59	2.49	32	42	2.15	3.25	12.88	19.5	5.69	39	81.82	135.95	24.51	21.86	24.52	21.87	8.12	5.96	-0.05	-0.02
0	0		Male		shTrem2	shTrem2 18			NOR		2025-04-15	2025-10-30	NOR	15:29:53	11:50:46	Customized		Arena 1		2025-10-30	00:10:00.00	Trial 40	Phase 1	9600	0.06	NOR	11:12:24	311.95	161.54	1.35	0.7	31	17	1.99	0.95	11.94	5.69	9.56	19.56	77.55	79.17	18.22	23.48	18.22	23.5	6.81	6.09	-0.1	0.12
0	0		Male		shTrem2	shTrem2 19			NOR		2025-04-15	2025-10-30	NOR	15:29:53	11:50:46	Customized		Arena 1		2025-10-30	00:10:00.00	Trial 41	Phase 1	9600	0.06	NOR	11:25:34	319.65	286.42	1.03	0.92	26	20	1.94	1.66	11.62	9.94	157	150	117.44	103.89	19.3	20.55	19.57	20.55	2.13	4.48	-0.07	-0.07
0	0		Male		shTrem2	shTrem2 20			NOR		2025-04-15	2025-10-30	NOR	15:29:53	11:50:46	Customized		Arena 1		2025-10-30	00:10:00.00	Trial 42	Phase 1	9600	0.06	NOR	11:37:28	178.55	149.54	0.74	0.62	23	22	1.11	0.92	6.69	5.5	40.94	11.31	108.77	106.56	20.86	20.63	20.85	20.63	7.39	5	0.07	0.07
[truncated: 206 more columns]
