# Supplementary material
Source: Research Square preprint supplement (doi:10.21203/rs.3.rs-9239420/v1)
Supplement: Supplementary file 2 [file 11e59a969e2911b4f4734f70.xlsx]

## Sheet: Sheet1
Behaviour Test: Sucrose Preference Test
	12h		24h		12h	24h
	Sucrose（g）	water（g）	Sucrose（g）	water（g）	Sucrose preference（%）	water preference（%）
Control 1	10.6	1.1	14.1	3.1	0.905983	0.819767
Control 2	9.9	0.8	14.2	4.6	0.925234	0.755319
Control 3	10.6	1.3	15.6	4.1	0.890756	0.791878
Control 4	10	1	13.4	3.6	0.909091	0.788235
Control 5	11.6	1.3	15.4	3.7	0.899225	0.806283
Control 6	9.1	1.4	13.6	3.6	0.866667	0.790698
Control 7	8.7	1.4	12.7	4	0.861386	0.760479
Control 8	8.5	1.3	13.1	3.9	0.867347	0.770588
Control 9	10.2	1.6	15.1	4.2	0.864407	0.782383
Control 10	8.9	1.5	13.4	3.9	0.855769	0.774566
Control 11	9.4	1.2	14.2	4.1	0.886792	0.775956
Control 12	9.5	1.6	13.9	4.4	0.855856	0.759563
Control 13	8.6	1.3	14.8	3.7	0.868687	0.8
Control 14	9.4	1.4	13.9	3.5	0.87037	0.798851
Control 15	9.1	1	14.2	3.8	0.90099	0.788889
Control 16	9.8	1.9	15.1	3.6	0.837607	0.807487
Control 17	8.8	1.7	13.2	3.4	0.838095	0.795181
Control 18	10.3	1.5	15.6	3.8	0.872881	0.804124
Control 19	9.5	1.6	14.5	3.9	0.855856	0.788043
Control 20	8.7	1.8	13.6	3.7	0.828571	0.786127
shTrem2 1	8.3	4.7	12.3	12.5	0.638462	0.495968
shTrem2 2	8	5.1	11.8	12.3	0.610687	0.489627
shTrem2 3	9.6	3.1	12.6	10.8	0.755906	0.538462
shTrem2 4	8	4.2	11	11.7	0.655738	0.484581
shTrem2 5	7.4	4.5	10.4	10.4	0.621849	0.5
shTrem2 6	7.2	4.9	10.8	12.6	0.595041	0.461538
shTrem2 7	6.3	5.6	9.9	10.3	0.529412	0.490099
shTrem2 8	6.5	5.2	9.8	13.1	0.555556	0.427948
shTrem2 9	7.1	6.1	10.6	12.9	0.537879	0.451064
shTrem2 10	6.6	5.4	12.4	14.5	0.55	0.460967
shTrem2 11	6.4	5.8	10.5	12.9	0.52459	0.448718
shTrem2 12	7.2	5	11.1	13.4	0.590164	0.453061
shTrem2 13	5.9	4.6	9.7	13.8	0.561905	0.412766
shTrem2 14	5.8	4.8	8.5	13.98	0.54717	0.378114
shTrem2 15	6.2	4.4	9.6	14.2	0.584906	0.403361
shTrem2 16	6	4.9	10.4	12.6	0.550459	0.452174
shTrem2 17	6.8	4.5	9.4	13	0.60177	0.419643
shTrem2 18	7	4.2	9.9	13.3	0.625	0.426724
shTrem2 19	5.4	5.1	10.1	14	0.514286	0.419087
shTrem2 20	5.2	4.7	9.4	12.5	0.525253	0.429224
