# Supplementary material
Source: Research Square preprint supplement (doi:10.21203/rs.3.rs-9239420/v1)
Supplement: Supplementary file 3 [file 1335da01809708edeff6e33a.xlsx]

## Sheet: Animals Info
Behaviour Test: Prepulse Inhibition
Number	74 dB PPI Pct(%)	78 dB PPI Pct(%)	86 dB PPI Pct(%)	ASR(a.u.)
Control 1	60.7929	45.9097	74.4500	1688
Control 2	55.6888	45.5073	84.9917	1646
Control 3	14.6692	46.0312	73.7755	1245
Control 4	54.8532	52.4899	88.9170	1678
Control 5	51.5402	65.7061	78.4534	428
Control 6	14.8114	54.1410	75.6765	1429
Control 7	42.5503	58.4204	76.4785	852
Control 8	28.7912	43.0186	60.2774	895
Control 9	44.0033	59.5773	65.9179	920
Control 10	57.8361	61.5212	65.3950	902
Control 11	73.7882	61.1027	87.6636	444
Control 12	64.1401	61.0334	42.0839	1600
Control 13	45.7343	52.2018	91.6630	1081
Control 14	47.9971	37.7772	61.8473	1452
Control 15	64.3657	68.1639	73.4770	2063
Control 16	21.6531	31.2246	58.3545	2055
Control 17	75.9464	77.6638	81.2792	1413
Control 18	57.7021	61.4582	78.4700	2504
Control 19	62.1049	59.1637	70.0697	2152
Control 20	49.9731	53.5319	79.1211	1695
shTrem2 1	52.4018	28.9820	58.4780	1415
shTrem2 2	77.2025	69.6424	86.3121	988
shTrem2 3	5.4620	8.2546	49.5483	812
shTrem2 4	52.8206	67.0887	60.3610	1273
shTrem2 5	15.6103	39.0480	51.7819	739
shTrem2 6	58.7641	69.0673	62.3593	1188
shTrem2 7	3.5743	30.4805	40.2899	934
shTrem2 8	21.8250	56.2015	35.7812	1298
shTrem2 9	81.4876	70.8394	74.6208	1651
shTrem2 10	7.0123	34.4944	4.9097	1091
shTrem2 11	3.5360	26.5775	36.1219	1050
shTrem2 12	57.5241	48.3354	64.7537	2552
shTrem2 13	50.1745	52.8771	76.2809	1913
shTrem2 14	34.0061	45.8816	49.6624	1045
shTrem2 15	35.2794	40.7561	47.8369	996
shTrem2 16	3.1051	12.0277	20.8193	2431
shTrem2 17	64.6705	58.0238	89.3139	1661
shTrem2 18	40.2481	52.8317	79.2721	1281
shTrem2 19	51.2287	39.4758	83.8481	1703
shTrem2 20	62.5298	73.1158	66.7461	1508

## Sheet: Control 1-2
Protocol Name	Result Name	Technician																													Chamber	BlockId	TrialId	X	ASR	Stimuli				ASRp
song20250429	Control 1-2	Administrator																													1	1	1	1	1.8946675832849	0.00665460841264576				Chamber	Block ID	Trial ID	Period	Decibel	PeakVal	BlockId0	TrialId0
																															1	1	1	2	1.89692558615934	3.25882389128674				1	2	1	PrePulse	74	0	2	30
Experiment Protocol																															1	1	1	3	1.90337702294346	3.25850131944753				1	2	1	Startle	120	0.0697	2	30
Name	Experiment Type	Protocol Type	first Createed By	Last Updated By	Last Updated Ts																										1	1	1	4	1.89531272696331	3.25753360392991				1	2	2	PrePulse	74	0	2	25
song20250429	Startle	PrepulseInhibition	Administrator	Administrator																											1	1	1	5	1.89789330167696	3.25882389128674				1	2	2	Startle	120	0.0113	2	25
																															1	1	1	6	1.89434501144569	3.25850131944753				1	2	3	PrePulse	74	0	2	28
Experiment result																															1	1	1	7	1.89660301432014	3.25753360392991				1	2	3	Startle	120	0.0397	2	28
Name	RunStatus	StartTime	Experimenter	CompleteTime	Platform Chamber1	Platform Chamber2	Platform Chamber3	Platform Chamber4	ASR																						1	1	1	8	1.89144186489284	3.25946903496515				1	2	7	PrePulse	74	0	2	22
Control 1-2	InProgress;Cancelled,Complete,	2025/11/1 11:24:06	Administrator	2025/11/1 11:55:17	1.88720703125	1.81304931640625	0.0616455078125	0.33966064453125	100																						1	1	1	9	1.89208700857125	3.2565658884123				1	2	7	Startle	120	0.0168	2	22
																															1	1	1	10	1.8895064338576	3.25882389128674				1	2	11	PrePulse	74	0	2	27
Trial Result																															1	1	1	11	1.89176443673205	3.25785617576912				1	2	11	Startle	120	0.0365	2	27
Chamber ID	Block ID	Trial ID	Period	Peak Value	Peak Time	Latency	Total Value	TotalAbsolute Value	AvgAbsolute Value	ARS Stdev	Avg Value	Rms Value	Start	End	PeriodCnt	Db	BlockId0	TrialId0													1	1	1	12	1.88982900569681	3.25817874760833				1	2	24	PrePulse	74	0	2	24
1	1	1	Null	0	0	0	0	0	0	0	0	0	0	0	0	0	1	1													1	1	1	13	1.89111929305363	3.25785617576912				1	2	24	Startle	120	0.0600	2	24
1	1	1	Startle	0.0804	22	21	0.3532	2.6067	0.0258	0.0348	0.0035	0.0348	1	40	40	120	1	1													1	1	1	14	1.8895064338576	3.25914646312594				1	2	26	PrePulse	74	0	2	29
1	1	2	Null	0	0	0	0	0	0	0	0	0	0	0	0	0	1	2													1	1	1	15	1.88757100282237	3.25850131944753				1	2	26	Startle	120	0.0229	2	29
1	1	2	Startle	0.3084	22	21	0.2742	6.0545	0.0599	0.0945	0.0027	0.0941	1	40	40	120	1	2													1	1	1	16	1.88757100282237	3.25785617576912				1	2	28	PrePulse	74	0	2	26
1	1	3	Null	0	0	0	0	0	0	0	0	0	0	0	0	0	1	3													1	1	1	17	1.88982900569681	3.25914646312594				1	2	28	Startle	120	0.0491	2	26
1	1	3	Startle	0.3778	22	21	0.3342	7.5010	0.0743	0.1150	0.0033	0.1145	1	40	40	120	1	3													1	1	1	18	1.90176416374743	3.25914646312594				1	2	40	PrePulse	74	0	2	23
1	1	4	Null	0	0	0	0	0	0	0	0	0	0	0	0	0	1	4													1	1	1	19	1.91337674995884	3.25882389128674				1	2	40	Startle	120	0.0194	2	23
1	1	4	Startle	0.0620	42	41	0.1132	1.9399	0.0192	0.0258	0.0011	0.0257	1	40	40	120	1	4													1	1	1	20	1.93434391950723	3.25979160680436				1	2	59	PrePulse	74	0	2	21
1	1	5	Null	0	0	0	0	0	0	0	0	0	0	0	0	0	1	5													1	1	1	21	1.95176279882435	3.25850131944753				1	2	59	Startle	120	0.0168	2	21
1	1	5	Startle	0.0500	16	15	0.2616	1.5532	0.0154	0.0220	0.0026	0.0220	1	40	40	120	1	5													1	1	1	22	1.96756881894544	3.25753360392991
1	1	6	Null	0	0	0	0	0	0	0	0	0	0	0	0	0	1	6													1	1	1	23	1.96692367526703	3.25914646312594				ASRc
1	1	6	Startle	0.1104	22	21	0.3293	2.2886	0.0227	0.0341	0.0033	0.0341	1	40	40	120	1	6													1	1	1	24	1.95692394825164	3.25850131944753				Chamber	Block ID	Trial ID	Period	Decibel	PeakVal	BlockId0	TrialId0
1	1	7	Null	0	0	0	0	0	0	0	0	0	0	0	0	0	1	7													1	1	1	25	1.93240848847199	3.25817874760833				1	2	4	Startle	120	0.0410	2	17
1	1	7	Startle	0.3062	21	20	0.2219	5.5306	0.0548	0.0876	0.0022	0.0871	1	40	40	120	1	7													1	1	1	26	1.90369959478267	3.25850131944753				1	2	9	Startle	120	0.1639	2	14
1	1	8	Null	0	0	0	0	0	0	0	0	0	0	0	0	0	1	8													1	1	1	27	1.86370068672113	3.25850131944753				1	2	12	Startle	120	0.0549	2	11
1	1	8	Startle	0.0258	56	55	0.2503	1.2057	0.0119	0.0142	0.0025	0.0143	1	40	40	120	1	8													1	1	1	28	1.83273379015736	3.25946903496515				1	2	18	Startle	120	0.0704	2	13
1	1	9	Null	0	0	0	0	0	0	0	0	0	0	0	0	0	1	9													1	1	1	29	1.80660547118168	3.25817874760833				1	2	25	Startle	120	0.0546	2	18
1	1	9	Startle	0.0471	45	44	0.2616	1.6898	0.0167	0.0222	0.0026	0.0222	1	40	40	120	1	9													1	1	1	30	1.79467031313106	3.25817874760833				1	2	43	Startle	120	0.2246	2	19
1	1	10	Null	0	0	0	0	0	0	0	0	0	0	0	0	0	1	10													1	1	1	31	1.80176689359359	3.25882389128674				1	2	46	Startle	120	0.0468	2	15
1	1	10	Startle	0.0313	50	49	0.2484	1.1074	0.0110	0.0141	0.0025	0.0143	1	40	40	120	1	10													1	1	1	32	1.80241203727201	3.25753360392991				1	2	50	Startle	120	0.0391	2	12
1	2	1	Null	0	0	0	0	0	0	0	0	0	0	0	0	0	2	30													1	1	1	33	1.8182180573931	3.25850131944753				1	2	51	Startle	120	0.0391	2	20
1	2	1	PrePulse	0.0207	2	1	-0.4242	0.9253	0.0092	0.0118	-0.0042	0.0125	1	20	20	74	2	30													1	1	1	34	1.83176607463974	3.25850131944753				1	2	53	Startle	120	0.1384	2	16
1	2	1	Startle	0.0697	178	57	0.7690	1.8755	0.0186	0.0236	0.0076	0.0247	121	160	40	120	2	30													1	1	1	35	1.84918495395686	3.25753360392991
1	2	2	Null	0	0	0	0	0	0	0	0	0	0	0	0	0	2	25													1	1	1	36	1.85337838786654	3.2568884602515				PPI Pct
1	2	2	PrePulse	0.0220	23	22	0.4155	0.6099	0.0060	0.0070	0.0041	0.0081	1	20	20	74	2	25													1	1	1	37	1.86241039936431	3.25850131944753				Chamber	Type	Details	Result
1	2	2	Startle	0.0113	141	20	0.3216	0.5864	0.0058	0.0059	0.0032	0.0067	121	160	40	120	2	25													1	1	1	38	1.86853926430922	3.25721103209071				1	ASRp	((0.0697 +0.0113 +0.0397 +0.0168 +0.0365 +0.0600 +0.0229 +0.0491 +0.0194 +0.0168)/10)*100	3.4220
1	2	3	Null	0	0	0	0	0	0	0	0	0	0	0	0	0	2	28													1	1	1	39	1.88144213787746	3.25817874760833				1	ASRc	((0.0410 +0.1639 +0.0549 +0.0704 +0.0546 +0.2246 +0.0468 +0.0391 +0.0391 +0.1384)/10)*100	8.7280
1	2	3	PrePulse	0.0123	4	3	0.2832	0.3684	0.0036	0.0040	0.0028	0.0049	1	20	20	74	2	28													1	1	1	40	1.89595787064172	3.25946903496515				1	PPI Pct	(ASRc - ASRp)/ASRc	60.7929
1	2	3	Startle	0.0397	167	46	0.1871	1.1994	0.0119	0.0151	0.0019	0.0151	121	160	40	120	2	28													1	1	1	41	1.91821532754693	3.25979160680436
1	2	4	Null	0	0	0	0	0	0	0	0	0	0	0	0	0	2	17													1	1	1	42	1.93660192238167	0.00665460841264576				ASRp
1	2	4	Startle	0.0410	142	21	0.3797	1.2884	0.0128	0.0158	0.0038	0.0162	121	160	40	120	2	17													1	1	1	43	1.95498851721641	0.0072997520910576				Chamber	Block ID	Trial ID	Period	Decibel	PeakVal	BlockId0	TrialId0
1	2	5	Null	0	0	0	0	0	0	0	0	0	0	0	0	0	2	34													1	1	1	44	1.96660110342782	0.00665460841264576				1	2	5	PrePulse	78	0	2	34
1	2	5	PrePulse	0.0152	99	98	0.2593	0.6191	0.0061	0.0074	0.0026	0.0078	1	20	20	78	2	34													1	1	1	45	1.96627853158861	0.00697718025185168				1	2	5	Startle	120	0.0429	2	34
1	2	5	Startle	0.0429	142	21	0.2984	1.6391	0.0162	0.0214	0.0030	0.0215	121	160	40	120	2	34													1	1	1	46	1.9598270948045	0.0072997520910576				1	2	6	PrePulse	78	0	2	35
1	2	6	Null	0	0	0	0	0	0	0	0	0	0	0	0	0	2	35													1	1	1	47	1.93950506893452	0.00697718025185168				1	2	6	Startle	120	0.0388	2	35
1	2	6	PrePulse	0.0158	45	44	0.3326	0.3763	0.0037	0.0036	0.0033	0.0049	1	20	20	78	2	35													1	1	1	48	1.91918304306455	0.00697718025185168				1	2	16	PrePulse	78	0	2	31
1	2	6	Startle	0.0388	142	21	0.2303	1.1627	0.0115	0.0153	0.0023	0.0154	121	160	40	120	2	35													1	1	1	49	1.8946675832849	0.005686892895028				1	2	16	Startle	120	0.0420	2	31
1	2	7	Null	0	0	0	0	0	0	0	0	0	0	0	0	0	2	22													1	1	1	50	1.87692613212857	0.00665460841264576				1	2	19	PrePulse	78	0	2	40
1	2	7	PrePulse	0.0281	88	87	0.6509	0.9544	0.0094	0.0096	0.0064	0.0115	1	20	20	74	2	22													1	1	1	51	1.86015239648987	0.00697718025185168				1	2	19	Startle	120	0.0223	2	40
1	2	7	Startle	0.0168	135	14	0.3355	0.7180	0.0071	0.0076	0.0033	0.0083	121	160	40	120	2	22													1	1	1	52	1.8562815344194	0.0072997520910576				1	2	20	PrePulse	78	0	2	33
1	2	8	Null	0	0	0	0	0	0	0	0	0	0	0	0	0	2	5													1	1	1	53	1.85370095970575	0.00697718025185168				1	2	20	Startle	120	0.0536	2	33
1	2	8	PrePulse	0.0136	65	64	0.3219	0.4602	0.0046	0.0049	0.0032	0.0058	1	20	20	66	2	5													1	1	1	54	1.85789439361542	0.00697718025185168				1	2	29	PrePulse	78	0	2	36
1	2	9	Null	0	0	0	0	0	0	0	0	0	0	0	0	0	2	14													1	1	1	55	1.8620878275251	0.0072997520910576				1	2	29	Startle	120	0.0500	2	36
1	2	9	Startle	0.1639	143	22	0.4677	3.3028	0.0327	0.0482	0.0046	0.0482	121	160	40	120	2	14													1	1	1	56	1.86853926430922	0.00697718025185168				1	2	30	PrePulse	78	0	2	38
1	2	10	Null	0	0	0	0	0	0	0	0	0	0	0	0	0	2	52													1	1	1	57	1.87144241086207	0.00633203657343984				1	2	30	Startle	120	0.0536	2	38
1	2	10	PrePulse	0.0213	65	64	0.1222	0.9736	0.0096	0.0114	0.0012	0.0114	1	20	20	74	2	52													1	1	1	58	1.8730552700581	0.00665460841264576				1	2	33	PrePulse	78	0	2	39
1	2	11	Null	0	0	0	0	0	0	0	0	0	0	0	0	0	2	27													1	1	1	59	1.87982927868143	0.00762232393026352				1	2	33	Startle	120	0.0975	2	39
1	2	11	PrePulse	0.0291	71	70	0.2519	1.2631	0.0125	0.0143	0.0025	0.0145	1	20	20	74	2	27													1	1	1	60	1.86853926430922	0.00697718025185168				1	2	44	PrePulse	78	0	2	32
1	2	11	Startle	0.0365	143	22	0.3619	1.1796	0.0117	0.0152	0.0036	0.0156	121	160	40	120	2	27													1	1	1	61	1.86853926430922	0.00697718025185168				1	2	44	Startle	120	0.0420	2	32
1	2	12	Null	0	0	0	0	0	0	0	0	0	0	0	0	0	2	11													1	1	1	62	1.86241039936431	0.00697718025185168				1	2	55	PrePulse	78	0	2	37
1	2	12	Startle	0.0549	143	22	0.2171	1.0492	0.0104	0.0156	0.0021	0.0156	121	160	40	120	2	11													1	1	1	63	1.86434583039954	0.0072997520910576				1	2	55	Startle	120	0.0294	2	37
1	2	13	Null	0	0	0	0	0	0	0	0	0	0	0	0	0	2	43													1	1	1	64	1.86079754016828	0.005686892895028
1	2	13	PrePulse	0.0429	53	52	0.1271	1.4979	0.0148	0.0182	0.0013	0.0181	1	20	20	86	2	43													1	1	1	65	1.86402325856034	0.00665460841264576				ASRc
1	2	13	Startle	0.0197	158	37	0.2774	0.5076	0.0050	0.0055	0.0027	0.0061	121	160	40	120	2	43													1	1	1	66	1.86853926430922	0.00697718025185168				Chamber	Block ID	Trial ID	Period	Decibel	PeakVal	BlockId0	TrialId0
1	2	14	Null	0	0	0	0	0	0	0	0	0	0	0	0	0	2	2													1	1	1	67	1.87757127580699	0.0072997520910576				1	2	4	Startle	120	0.0410	2	17
1	2	14	PrePulse	0.0281	60	59	0.2880	0.7981	0.0079	0.0102	0.0029	0.0106	1	20	20	66	2	2													1	1	1	68	1.88595814362634	0.00633203657343984				1	2	9	Startle	120	0.1639	2	14
1	2	15	Null	0	0	0	0	0	0	0	0	0	0	0	0	0	2	6													1	1	1	69	1.89757072983775	0.00697718025185168				1	2	12	Startle	120	0.0549	2	11
1	2	15	PrePulse	0.0162	4	3	0.3609	0.4956	0.0049	0.0052	0.0036	0.0063	1	20	20	66	2	6													1	1	1	70	1.90595759765711	0.0072997520910576				1	2	18	Startle	120	0.0704	2	13
1	2	16	Null	0	0	0	0	0	0	0	0	0	0	0	0	0	2	31													1	1	1	71	1.91273160628043	0.00633203657343984				1	2	25	Startle	120	0.0546	2	18
1	2	16	PrePulse	0.0120	99	98	0.3180	0.3542	0.0035	0.0031	0.0031	0.0044	1	20	20	78	2	31													1	1	1	72	1.91757018386852	0.0072997520910576				1	2	43	Startle	120	0.2246	2	19
1	2	16	Startle	0.0420	145	24	0.4335	1.4104	0.0140	0.0176	0.0043	0.0180	121	160	40	120	2	31													1	1	1	73	1.91144131892361	0.00665460841264576				1	2	46	Startle	120	0.0468	2	15
1	2	17	Null	0	0	0	0	0	0	0	0	0	0	0	0	0	2	41													1	1	1	74	1.90950588788837	0.0072997520910576				1	2	50	Startle	120	0.0391	2	12
1	2	17	PrePulse	0.0462	56	55	0.2800	1.1472	0.0114	0.0161	0.0028	0.0162	1	20	20	86	2	41													1	1	1	75	1.90369959478267	0.00633203657343984				1	2	51	Startle	120	0.0391	2	20
1	2	17	Startle	0.0210	177	56	0.3577	0.4941	0.0049	0.0055	0.0035	0.0065	121	160	40	120	2	41													1	1	1	76	1.90369959478267	0.00665460841264576				1	2	53	Startle	120	0.1384	2	16
1	2	18	Null	0	0	0	0	0	0	0	0	0	0	0	0	0	2	13													1	1	1	77	1.90144159190822	0.0072997520910576
1	2	18	Startle	0.0704	144	23	-0.0532	1.6828	0.0167	0.0221	-0.0005	0.0220	121	160	40	120	2	13													1	1	1	78	1.90853817237075	0.00762232393026352				PPI Pct
1	2	19	Null	0	0	0	0	0	0	0	0	0	0	0	0	0	2	40													1	1	1	79	1.91144131892361	0.00697718025185168				Chamber	Type	Details	Result
1	2	19	PrePulse	0.0242	36	35	0.2739	0.5842	0.0058	0.0074	0.0027	0.0078	1	20	20	78	2	40													1	1	1	80	1.92015075858217	0.00536432105582207				1	ASRp	((0.0429 +0.0388 +0.0420 +0.0223 +0.0536 +0.0500 +0.0536 +0.0975 +0.0420 +0.0294)/10)*100	4.7210
1	2	19	Startle	0.0223	209	88	0.4103	0.8093	0.0080	0.0092	0.0041	0.0100	121	160	40	120	2	40													1	1	1	81	1.91982818674296	0.00762232393026352				1	ASRc	((0.0410 +0.1639 +0.0549 +0.0704 +0.0546 +0.2246 +0.0468 +0.0391 +0.0391 +0.1384)/10)*100	8.7280
1	2	20	Null	0	0	0	0	0	0	0	0	0	0	0	0	0	2	33													1	1	1	82	1.92144104593899	0.00665460841264576				1	PPI Pct	(ASRc - ASRp)/ASRc	45.9097
1	2	20	PrePulse	0.0204	56	55	0.1651	0.6484	0.0064	0.0078	0.0016	0.0079	1	20	20	78	2	33													1	1	1	83	1.91498960915487	0.0072997520910576
1	2	20	Startle	0.0536	143	22	0.2551	1.2430	0.0123	0.0184	0.0025	0.0185	121	160	40	120	2	33													1	1	1	84	1.90853817237075	0.00697718025185168				ASRp
1	2	21	Null	0	0	0	0	0	0	0	0	0	0	0	0	0	2	49													1	1	1	85	1.89982873271219	0.00633203657343984				Chamber	Block ID	Trial ID	Period	Decibel	PeakVal	BlockId0	TrialId0
1	2	21	PrePulse	0.0204	35	34	0.3368	0.8221	0.0081	0.0088	0.0033	0.0094	1	20	20	86	2	49													1	1	1	86	1.89240958041046	0.0072997520910576				1	2	13	PrePulse	86	0	2	43
1	2	21	Startle	0.0262	160	39	0.3093	0.7658	0.0076	0.0092	0.0031	0.0097	121	160	40	120	2	49													1	1	1	87	1.89692558615934	0.00697718025185168				1	2	13	Startle	120	0.0197	2	43
1	2	22	Null	0	0	0	0	0	0	0	0	0	0	0	0	0	2	9													1	1	1	88	1.88982900569681	0.00697718025185168				1	2	17	PrePulse	86	0	2	41
1	2	22	PrePulse	0.0113	63	62	0.2926	0.4088	0.0040	0.0040	0.0029	0.0049	1	20	20	66	2	9													1	1	1	89	1.89434501144569	0.00762232393026352				1	2	17	Startle	120	0.0210	2	41
1	2	23	Null	0	0	0	0	0	0	0	0	0	0	0	0	0	2	44													1	1	1	90	1.89724815799855	0.0072997520910576				1	2	21	PrePulse	86	0	2	49
1	2	23	PrePulse	0.0426	44	43	-0.1545	1.7101	0.0169	0.0213	-0.0015	0.0212	1	20	20	86	2	44													1	1	1	91	1.90273187926505	0.00697718025185168				1	2	21	Startle	120	0.0262	2	49
1	2	23	Startle	0.0126	144	23	0.2535	0.5006	0.0050	0.0054	0.0025	0.0059	121	160	40	120	2	44													1	1	1	92	1.89821587351616	0.0072997520910576				1	2	23	PrePulse	86	0	2	44
1	2	24	Null	0	0	0	0	0	0	0	0	0	0	0	0	0	2	24													1	1	1	93	1.89660301432014	0.00697718025185168				1	2	23	Startle	120	0.0126	2	44
1	2	24	PrePulse	0.0304	91	90	0.2406	0.7041	0.0070	0.0100	0.0024	0.0102	1	20	20	74	2	24													1	1	1	94	1.89015157753602	0.00633203657343984				1	2	31	PrePulse	86	0	2	42
1	2	24	Startle	0.0600	144	23	0.1929	1.2887	0.0128	0.0182	0.0019	0.0183	121	160	40	120	2	24													1	1	1	95	1.88660328730475	0.00697718025185168				1	2	31	Startle	120	0.0504	2	42
1	2	25	Null	0	0	0	0	0	0	0	0	0	0	0	0	0	2	18													1	1	1	96	1.87886156316381	0.00665460841264576				1	2	32	PrePulse	86	0	2	47
1	2	25	Startle	0.0546	167	46	0.2864	1.5121	0.0150	0.0200	0.0028	0.0201	121	160	40	120	2	18													1	1	1	97	1.87595841661096	0.0072997520910576				1	2	32	Startle	120	0.0165	2	47
1	2	26	Null	0	0	0	0	0	0	0	0	0	0	0	0	0	2	29													1	1	1	98	1.87111983902287	0.00633203657343984				1	2	47	PrePulse	86	0	2	46
1	2	26	PrePulse	0.0194	94	93	0.3661	0.8226	0.0081	0.0086	0.0036	0.0093	1	20	20	74	2	29													1	1	1	99	1.87015212350525	0.00665460841264576				1	2	47	Startle	120	0.0278	2	46
1	2	26	Startle	0.0229	168	47	0.3006	0.7203	0.0071	0.0090	0.0030	0.0094	121	160	40	120	2	29													1	1	1	100	1.87370041373651	0.00633203657343984				1	2	48	PrePulse	86	0	2	48
1	2	27	Null	0	0	0	0	0	0	0	0	0	0	0	0	0	2	4													1	1	1	101	1.87047469534446	0.00633203657343984				1	2	48	Startle	120	0.0142	2	48
1	2	27	PrePulse	0.0184	35	34	0.3761	0.6624	0.0066	0.0068	0.0037	0.0078	1	20	20	66	2	4													1	1	1	102	1.87724870396778	0.00665460841264576				1	2	56	PrePulse	86	0	2	45
1	2	28	Null	0	0	0	0	0	0	0	0	0	0	0	0	0	2	26													1	1	1	103	1.87789384764619	0.00665460841264576				1	2	56	Startle	120	0.0181	2	45
1	2	28	PrePulse	0.0133	82	81	0.3690	0.4021	0.0040	0.0036	0.0037	0.0051	1	20	20	74	2	26													1	1	1	104	1.88434528443031	0.00762232393026352				1	2	57	PrePulse	86	0	2	50
1	2	28	Startle	0.0491	142	21	0.3200	0.8187	0.0081	0.0118	0.0032	0.0121	121	160	40	120	2	26													1	1	1	105	1.8837001407519	0.00697718025185168				1	2	57	Startle	120	0.0165	2	50
1	2	29	Null	0	0	0	0	0	0	0	0	0	0	0	0	0	2	36													1	1	1	106	1.88757100282237	0.00665460841264576
1	2	29	PrePulse	0.0120	49	48	0.2764	0.4178	0.0041	0.0045	0.0027	0.0053	1	20	20	78	2	36													1	1	1	107	1.8840227125911	0.0072997520910576				ASRc
1	2	29	Startle	0.0500	144	23	0.2577	1.3020	0.0129	0.0169	0.0026	0.0170	121	160	40	120	2	36													1	1	1	108	1.88434528443031	0.00697718025185168				Chamber	Block ID	Trial ID	Period	Decibel	PeakVal	BlockId0	TrialId0
1	2	30	Null	0	0	0	0	0	0	0	0	0	0	0	0	0	2	38													1	1	1	109	1.88079699419904	0.00633203657343984				1	2	4	Startle	120	0.0410	2	17
1	2	30	PrePulse	0.0184	39	38	0.3855	0.4212	0.0042	0.0042	0.0038	0.0056	1	20	20	78	2	38													1	1	1	110	1.87918413500302	0.005686892895028				1	2	9	Startle	120	0.1639	2	14
1	2	30	Startle	0.0536	142	21	0.2903	1.0821	0.0107	0.0154	0.0029	0.0156	121	160	40	120	2	38													1	1	1	111	1.87499070109334	0.00633203657343984				1	2	12	Startle	120	0.0549	2	11
1	2	31	Null	0	0	0	0	0	0	0	0	0	0	0	0	0	2	42													1	1	1	112	1.87499070109334	0.0072997520910576				1	2	18	Startle	120	0.0704	2	13
1	2	31	PrePulse	0.0371	55	54	0.5271	0.9400	0.0093	0.0118	0.0052	0.0128	1	20	20	86	2	42													1	1	1	113	1.87370041373651	0.00665460841264576				1	2	25	Startle	120	0.0546	2	18
1	2	31	Startle	0.0504	169	48	0.5284	1.4037	0.0139	0.0176	0.0052	0.0183	121	160	40	120	2	42													1	1	1	114	1.87370041373651	0.00633203657343984				1	2	43	Startle	120	0.2246	2	19
1	2	32	Null	0	0	0	0	0	0	0	0	0	0	0	0	0	2	47													1	1	1	115	1.88240985339507	0.00665460841264576				1	2	46	Startle	120	0.0468	2	15
1	2	32	PrePulse	0.0262	42	41	0.2764	0.4716	0.0047	0.0062	0.0027	0.0068	1	20	20	86	2	47													1	1	1	116	1.87886156316381	0.00697718025185168				1	2	50	Startle	120	0.0391	2	12
1	2	32	Startle	0.0165	203	82	0.3506	0.4332	0.0043	0.0042	0.0035	0.0055	121	160	40	120	2	47													1	1	1	117	1.88499042810872	0.0072997520910576				1	2	51	Startle	120	0.0391	2	20
1	2	33	Null	0	0	0	0	0	0	0	0	0	0	0	0	0	2	39													1	1	1	118	1.8895064338576	0.00697718025185168				1	2	53	Startle	120	0.1384	2	16
1	2	33	PrePulse	0.0210	57	56	0.3916	0.8041	0.0080	0.0090	0.0039	0.0098	1	20	20	78	2	39													1	1	1	119	1.89692558615934	0.0072997520910576
1	2	33	Startle	0.0975	143	22	0.3906	2.0978	0.0208	0.0302	0.0039	0.0303	121	160	40	120	2	39													1	1	1	120	1.89918358903378	0.00665460841264576				PPI Pct
1	2	34	Null	0	0	0	0	0	0	0	0	0	0	0	0	0	2	59													1	1	1	121	1.90434473846108	0.00697718025185168				Chamber	Type	Details	Result
1	2	34	PrePulse	0.0236	65	64	0.4764	0.7290	0.0072	0.0078	0.0047	0.0091	1	20	20	86	2	59													1	1	1	122	1.90660274133552	0.00762232393026352				1	ASRp	((0.0197 +0.0210 +0.0262 +0.0126 +0.0504 +0.0165 +0.0278 +0.0142 +0.0181 +0.0165)/10)*100	2.2300
1	2	35	Null	0	0	0	0	0	0	0	0	0	0	0	0	0	2	7													1	1	1	123	1.90918331604917	0.00697718025185168				1	ASRc	((0.0410 +0.1639 +0.0549 +0.0704 +0.0546 +0.2246 +0.0468 +0.0391 +0.0391 +0.1384)/10)*100	8.7280
1	2	35	PrePulse	0.0184	20	19	0.3222	0.5369	0.0053	0.0061	0.0032	0.0068	1	20	20	66	2	7													1	1	1	124	1.90821560053155	0.00665460841264576				1	PPI Pct	(ASRc - ASRp)/ASRc	74.4500
1	2	36	Null	0	0	0	0	0	0	0	0	0	0	0	0	0	2	57													1	1	1	125	1.90886074420996	0.0072997520910576
1	2	36	PrePulse	0.0158	10	9	0.4700	0.5283	0.0052	0.0044	0.0047	0.0064	1	20	20	86	2	57													1	1	1	126	1.9056350258179	0.00697718025185168				ASRp
1	2	37	Null	0	0	0	0	0	0	0	0	0	0	0	0	0	2	8													1	1	1	127	1.90144159190822	0.00762232393026352				Chamber	Block ID	Trial ID	Period	Decibel	AvgVal	BlockId0	TrialId0
1	2	37	PrePulse	0.0194	10	9	0.3084	0.6511	0.0064	0.0074	0.0031	0.0079	1	20	20	66	2	8													1	1	1	128	1.90369959478267	0.00762232393026352				1	2	1	PrePulse	74	0	2	30
1	2	38	Null	0	0	0	0	0	0	0	0	0	0	0	0	0	2	54													1	1	1	129	1.89144186489284	0.00697718025185168				1	2	1	Startle	120	0.0076	2	30
1	2	38	PrePulse	0.0158	47	46	0.2764	0.3944	0.0039	0.0048	0.0027	0.0055	1	20	20	78	2	54													1	1	1	130	1.8895064338576	0.0072997520910576				1	2	2	PrePulse	74	0	2	25
1	2	39	Null	0	0	0	0	0	0	0	0	0	0	0	0	0	2	58													1	1	1	131	1.88305499707349	0.00665460841264576				1	2	2	Startle	120	0.0032	2	25
1	2	39	PrePulse	0.0226	3	2	0.3693	0.6729	0.0067	0.0073	0.0037	0.0082	1	20	20	86	2	58													1	1	1	132	1.88660328730475	0.00697718025185168				1	2	3	PrePulse	74	0	2	28
1	2	40	Null	0	0	0	0	0	0	0	0	0	0	0	0	0	2	23													1	1	1	133	1.88144213787746	0.00697718025185168				1	2	3	Startle	120	0.0019	2	28
1	2	40	PrePulse	0.0117	62	61	0.3074	0.3766	0.0037	0.0035	0.0030	0.0046	1	20	20	74	2	23													1	1	1	134	1.88499042810872	0.00697718025185168				1	2	7	PrePulse	74	0	2	22
1	2	40	Startle	0.0194	177	56	0.2887	0.5009	0.0050	0.0061	0.0029	0.0067	121	160	40	120	2	23													1	1	1	135	1.88595814362634	0.00697718025185168				1	2	7	Startle	120	0.0033	2	22
1	2	41	Null	0	0	0	0	0	0	0	0	0	0	0	0	0	2	60													1	1	1	136	1.89079672121443	0.0072997520910576				1	2	11	PrePulse	74	0	2	27
1	2	41	PrePulse	0.0323	51	50	0.4129	0.8210	0.0081	0.0118	0.0041	0.0125	1	20	20	86	2	60													1	1	1	137	1.89369986776728	0.00633203657343984				1	2	11	Startle	120	0.0036	2	27
1	2	42	Null	0	0	0	0	0	0	0	0	0	0	0	0	0	2	10													1	1	1	138	1.89886101719458	0.00762232393026352				1	2	24	PrePulse	74	0	2	24
1	2	42	PrePulse	0.0184	27	26	0.3580	0.5401	0.0053	0.0058	0.0035	0.0068	1	20	20	66	2	10													1	1	1	139	1.90047387639061	0.00665460841264576				1	2	24	Startle	120	0.0019	2	24
1	2	43	Null	0	0	0	0	0	0	0	0	0	0	0	0	0	2	19													1	1	1	140	1.90337702294346	0.00665460841264576				1	2	26	PrePulse	74	0	2	29
1	2	43	Startle	0.2246	143	22	0.3987	3.9566	0.0392	0.0633	0.0039	0.0631	121	160	40	120	2	19													1	1	1	141	1.90434473846108	0.0072997520910576				1	2	26	Startle	120	0.0030	2	29
1	2	44	Null	0	0	0	0	0	0	0	0	0	0	0	0	0	2	32													1	1	1	142	1.90337702294346	0.00665460841264576				1	2	28	PrePulse	74	0	2	26
1	2	44	PrePulse	0.0352	54	53	0.3235	1.1749	0.0116	0.0143	0.0032	0.0146	1	20	20	78	2	32													1	1	1	143	1.9053124539787	0.00697718025185168				1	2	28	Startle	120	0.0032	2	26
1	2	44	Startle	0.0420	164	43	0.2709	1.1701	0.0116	0.0152	0.0027	0.0153	121	160	40	120	2	32													1	1	1	144	1.89821587351616	0.00697718025185168				1	2	40	PrePulse	74	0	2	23
1	2	45	Null	0	0	0	0	0	0	0	0	0	0	0	0	0	2	1													1	1	1	145	1.89628044248093	0.00697718025185168				1	2	40	Startle	120	0.0029	2	23
1	2	45	PrePulse	0.0313	43	42	0.1390	0.8674	0.0086	0.0113	0.0014	0.0113	1	20	20	66	2	1													1	1	1	146	1.89111929305363	0.00697718025185168				1	2	59	PrePulse	74	0	2	21
1	2	46	Null	0	0	0	0	0	0	0	0	0	0	0	0	0	2	15													1	1	1	147	1.89273215224966	0.00665460841264576				1	2	59	Startle	120	0.0036	2	21
1	2	46	Startle	0.0468	143	22	0.3255	1.1963	0.0118	0.0150	0.0032	0.0152	121	160	40	120	2	15													1	1	1	148	1.88789357466158	0.00633203657343984
1	2	47	Null	0	0	0	0	0	0	0	0	0	0	0	0	0	2	46													1	1	1	149	1.88982900569681	0.00762232393026352				ASRc
1	2	47	PrePulse	0.0139	21	20	0.2897	0.4711	0.0047	0.0052	0.0029	0.0059	1	20	20	86	2	46													1	1	1	150	1.88724843098316	0.00697718025185168				Chamber	Block ID	Trial ID	Period	Decibel	AvgVal	BlockId0	TrialId0
1	2	47	Startle	0.0278	142	21	0.2468	0.7898	0.0078	0.0099	0.0024	0.0102	121	160	40	120	2	46													1	1	1	151	1.89144186489284	0.00697718025185168				1	2	4	Startle	120	0.0038	2	17
1	2	48	Null	0	0	0	0	0	0	0	0	0	0	0	0	0	2	48													1	1	1	152	1.8895064338576	0.00697718025185168				1	2	9	Startle	120	0.0046	2	14
1	2	48	PrePulse	0.0191	2	1	0.3019	0.6890	0.0068	0.0082	0.0030	0.0087	1	20	20	86	2	48													1	1	1	153	1.89015157753602	0.0072997520910576				1	2	12	Startle	120	0.0021	2	11
1	2	48	Startle	0.0142	125	4	0.2606	0.3848	0.0038	0.0042	0.0026	0.0049	121	160	40	120	2	48													1	1	1	154	1.8895064338576	0.00633203657343984				1	2	18	Startle	120	-0.0005	2	13
1	2	49	Null	0	0	0	0	0	0	0	0	0	0	0	0	0	2	53													1	1	1	155	1.88982900569681	0.00762232393026352				1	2	25	Startle	120	0.0028	2	18
1	2	49	PrePulse	0.0300	20	19	0.2558	1.1386	0.0113	0.0140	0.0025	0.0142	1	20	20	74	2	53													1	1	1	156	1.89724815799855	0.0072997520910576				1	2	43	Startle	120	0.0039	2	19
1	2	50	Null	0	0	0	0	0	0	0	0	0	0	0	0	0	2	12													1	1	1	157	1.88853871833999	0.00665460841264576				1	2	46	Startle	120	0.0032	2	15
1	2	50	Startle	0.0391	171	50	0.3500	1.2704	0.0126	0.0175	0.0035	0.0178	121	160	40	120	2	12													1	1	1	158	1.89111929305363	0.00665460841264576				1	2	50	Startle	120	0.0035	2	12
1	2	51	Null	0	0	0	0	0	0	0	0	0	0	0	0	0	2	20													1	1	1	159	1.8895064338576	0.00697718025185168				1	2	51	Startle	120	0.0041	2	20
1	2	51	Startle	0.0391	164	43	0.4135	1.1771	0.0117	0.0147	0.0041	0.0151	121	160	40	120	2	20													1	1	1	160	1.89369986776728	0.0072997520910576				1	2	53	Startle	120	0.0029	2	16
1	2	52	Null	0	0	0	0	0	0	0	0	0	0	0	0	0	2	55													1	1	1	161	1.89079672121443	0.00633203657343984
1	2	52	PrePulse	0.0184	12	11	0.3968	0.5388	0.0053	0.0053	0.0039	0.0066	1	20	20	78	2	55													1	1	1	162	1.89176443673205	0.00665460841264576				PPI Pct
1	2	53	Null	0	0	0	0	0	0	0	0	0	0	0	0	0	2	16													1	1	1	163	1.8895064338576	0.00697718025185168				Chamber	Type	Details	Result
1	2	53	Startle	0.1384	143	22	0.2942	2.8660	0.0284	0.0421	0.0029	0.0419	121	160	40	120	2	16													1	1	1	164	1.89079672121443	0.0072997520910576				1	ASRp	((0.0076 +0.0032 +0.0019 +0.0033 +0.0036 +0.0019 +0.0030 +0.0032 +0.0029 +0.0036)/10)*100	0.3420
1	2	54	Null	0	0	0	0	0	0	0	0	0	0	0	0	0	2	3													1	1	1	165	1.8891838620184	0.00697718025185168				1	ASRc	((0.0038 +0.0046 +0.0021 +-0.0005 +0.0028 +0.0039 +0.0032 +0.0035 +0.0041 +0.0029)/10)*100	0.3040
1	2	54	PrePulse	0.0184	35	34	0.2606	0.5531	0.0055	0.0062	0.0026	0.0067	1	20	20	66	2	3													1	1	1	166	1.88757100282237	0.00762232393026352				1	PPI Pct	(ASRc - ASRp)/ASRc	-12.500
1	2	55	Null	0	0	0	0	0	0	0	0	0	0	0	0	0	2	37													1	1	1	167	1.8840227125911	0.00697718025185168
1	2	55	PrePulse	0.0126	85	84	0.2606	0.3446	0.0034	0.0035	0.0026	0.0043	1	20	20	78	2	37													1	1	1	168	1.88499042810872	0.00665460841264576				ASRp
1	2	55	Startle	0.0294	168	47	0.2822	0.6934	0.0069	0.0086	0.0028	0.0090	121	160	40	120	2	37													1	1	1	169	1.88337756891269	0.00697718025185168				Chamber	Block ID	Trial ID	Period	Decibel	AvgVal	BlockId0	TrialId0
1	2	56	Null	0	0	0	0	0	0	0	0	0	0	0	0	0	2	45													1	1	1	170	1.88144213787746	0.005686892895028				1	2	5	PrePulse	78	0	2	34
1	2	56	PrePulse	0.0178	62	61	0.5113	0.9736	0.0096	0.0094	0.0051	0.0106	1	20	20	86	2	45													1	1	1	171	1.88434528443031	0.0072997520910576				1	2	5	Startle	120	0.0030	2	34
1	2	56	Startle	0.0181	190	69	0.3245	0.7319	0.0072	0.0080	0.0032	0.0086	121	160	40	120	2	45													1	1	1	172	1.88240985339507	0.00697718025185168				1	2	6	PrePulse	78	0	2	35
1	2	57	Null	0	0	0	0	0	0	0	0	0	0	0	0	0	2	50													1	1	1	173	1.88628071546555	0.0072997520910576				1	2	6	Startle	120	0.0023	2	35
1	2	57	PrePulse	0.0162	51	50	0.3322	0.6336	0.0063	0.0065	0.0033	0.0072	1	20	20	86	2	50													1	1	1	174	1.88628071546555	0.00665460841264576				1	2	16	PrePulse	78	0	2	31
1	2	57	Startle	0.0165	176	55	0.2806	0.6121	0.0061	0.0070	0.0028	0.0075	121	160	40	120	2	50													1	1	1	175	1.89111929305363	0.00665460841264576				1	2	16	Startle	120	0.0043	2	31
1	2	58	Null	0	0	0	0	0	0	0	0	0	0	0	0	0	2	51													1	1	1	176	1.8895064338576	0.0072997520910576				1	2	19	PrePulse	78	0	2	40
1	2	58	PrePulse	0.0217	61	60	0.3406	0.7287	0.0072	0.0090	0.0034	0.0096	1	20	20	74	2	51													1	1	1	177	1.89337729592808	0.00633203657343984				1	2	19	Startle	120	0.0041	2	40
1	2	59	Null	0	0	0	0	0	0	0	0	0	0	0	0	0	2	21													1	1	1	178	1.89369986776728	0.00697718025185168				1	2	20	PrePulse	78	0	2	33
1	2	59	PrePulse	0.0191	38	37	0.3126	0.8453	0.0084	0.0096	0.0031	0.0100	1	20	20	74	2	21													1	1	1	179	1.89692558615934	0.00794489576946944				1	2	20	Startle	120	0.0025	2	33
1	2	59	Startle	0.0168	138	17	0.3629	0.5258	0.0052	0.0055	0.0036	0.0066	121	160	40	120	2	21													1	1	1	180	1.89402243960649	0.00665460841264576				1	2	29	PrePulse	78	0	2	36
1	2	60	Null	0	0	0	0	0	0	0	0	0	0	0	0	0	2	56													1	1	1	181	1.8946675832849	0.00665460841264576				1	2	29	Startle	120	0.0026	2	36
1	2	60	PrePulse	0.0155	15	14	0.3974	0.6518	0.0065	0.0065	0.0039	0.0076	1	20	20	78	2	56													1	1	1	182	1.89305472408887	0.00665460841264576				1	2	30	PrePulse	78	0	2	38
1	3	1	Null	0	0	0	0	0	0	0	0	0	0	0	0	0	3	1													1	1	1	183	1.89337729592808	0.00697718025185168				1	2	30	Startle	120	0.0029	2	38
1	3	1	Startle	0.0633	164	43	0.4229	1.9169	0.0190	0.0250	0.0042	0.0252	121	160	40	120	3	1													1	1	1	184	1.89982873271219	0.00665460841264576				1	2	33	PrePulse	78	0	2	39
1	3	2	Null	0	0	0	0	0	0	0	0	0	0	0	0	0	3	2													1	1	1	185	1.89111929305363	0.0072997520910576				1	2	33	Startle	120	0.0039	2	39
1	3	2	Startle	0.0155	191	70	0.3445	0.7006	0.0069	0.0076	0.0034	0.0083	121	160	40	120	3	2													1	1	1	186	1.89273215224966	0.0072997520910576				1	2	44	PrePulse	78	0	2	32
1	3	3	Null	0	0	0	0	0	0	0	0	0	0	0	0	0	3	3													1	1	1	187	1.8895064338576	0.0072997520910576				1	2	44	Startle	120	0.0027	2	32
1	3	3	Startle	0.0655	170	49	0.8025	2.1852	0.0216	0.0311	0.0079	0.0320	121	160	40	120	3	3													1	1	1	188	1.89240958041046	0.00697718025185168				1	2	55	PrePulse	78	0	2	37
1	3	4	Null	0	0	0	0	0	0	0	0	0	0	0	0	0	3	4													1	1	1	189	1.88789357466158	0.00633203657343984				1	2	55	Startle	120	0.0028	2	37
1	3	4	Startle	0.0217	168	47	0.2232	0.7814	0.0077	0.0095	0.0022	0.0097	121	160	40	120	3	4													1	1	1	190	1.88595814362634	0.00633203657343984
1	3	5	Null	0	0	0	0	0	0	0	0	0	0	0	0	0	3	5													1	1	1	191	1.8840227125911	0.00697718025185168				ASRc
1	3	5	Startle	0.0729	168	47	0.2122	3.0338	0.0300	0.0396	0.0021	0.0395	121	160	40	120	3	5													1	1	1	192	1.88595814362634	0.00794489576946944				Chamber	Block ID	Trial ID	Period	Decibel	AvgVal	BlockId0	TrialId0
1	3	6	Null	0	0	0	0	0	0	0	0	0	0	0	0	0	3	6													1	1	1	193	1.88628071546555	0.00633203657343984				1	2	4	Startle	120	0.0038	2	17
1	3	6	Startle	0.0526	176	55	0.4274	2.3497	0.0233	0.0306	0.0042	0.0307	121	160	40	120	3	6													1	1	1	194	1.8895064338576	0.0072997520910576				1	2	9	Startle	120	0.0046	2	14
1	3	7	Null	0	0	0	0	0	0	0	0	0	0	0	0	0	3	7													1	1	1	195	1.8891838620184	0.00826746760867536				1	2	12	Startle	120	0.0021	2	11
1	3	7	Startle	0.0433	164	43	0.3139	1.0258	0.0102	0.0139	0.0031	0.0142	121	160	40	120	3	7													1	1	1	196	1.89079672121443	0.00665460841264576				1	2	18	Startle	120	-0.0005	2	13
1	3	8	Null	0	0	0	0	0	0	0	0	0	0	0	0	0	3	8													1	1	1	197	1.89434501144569	0.00697718025185168				1	2	25	Startle	120	0.0028	2	18
1	3	8	Startle	0.0404	162	41	0.3948	1.2050	0.0119	0.0150	0.0039	0.0154	121	160	40	120	3	8													1	1	1	198	1.89015157753602	0.0072997520910576				1	2	43	Startle	120	0.0039	2	19
1	3	9	Null	0	0	0	0	0	0	0	0	0	0	0	0	0	3	9													1	1	1	199	1.89337729592808	0.00826746760867536				1	2	46	Startle	120	0.0032	2	15
1	3	9	Startle	0.0310	163	42	0.3271	1.1705	0.0116	0.0132	0.0032	0.0135	121	160	40	120	3	9													1	1	1	200	1.8895064338576	0.0072997520910576				1	2	50	Startle	120	0.0035	2	12
1	3	10	Null	0	0	0	0	0	0	0	0	0	0	0	0	0	3	10													1	1	1	201	1.89144186489284	0.0072997520910576				1	2	51	Startle	120	0.0041	2	20
1	3	10	Startle	0.2004	143	22	0.1755	3.8952	0.0386	0.0599	0.0017	0.0597	121	160	40	120	3	10													1	1	1	202	1.88724843098316	0.0072997520910576				1	2	53	Startle	120	0.0029	2	16
																															1	1	1	203	1.88982900569681	0.0072997520910576
Chamber ID	DataType	Decibel	ASRp(%)	ASRc(%)	PPI Pct(%)																										1	1	1	204	1.88595814362634	0.00665460841264576				PPI Pct
1	PeakVal	74	3.4220	8.7280	60.7929																										1	1	1	205	1.8891838620184	0.00697718025185168				Chamber	Type	Details	Result
1	PeakVal	78	4.7210	8.7280	45.9097																										1	1	1	206	1.8891838620184	0.00665460841264576				1	ASRp	((0.0030 +0.0023 +0.0043 +0.0041 +0.0025 +0.0026 +0.0029 +0.0039 +0.0027 +0.0028)/10)*100	0.3110
1	PeakVal	86	2.2300	8.7280	74.4500																										1	1	1	207	1.89144186489284	0.00697718025185168				1	ASRc	((0.0038 +0.0046 +0.0021 +-0.0005 +0.0028 +0.0039 +0.0032 +0.0035 +0.0041 +0.0029)/10)*100	0.3040
																															1	1	1	208	1.89208700857125	0.00697718025185168				1	PPI Pct	(ASRc - ASRp)/ASRc	-2.3026
Chamber ID	DataType	Decibel	ASRp(%)	ASRc(%)	PPI Pct(%)																										1	1	1	209	1.89273215224966	0.00697718025185168
1	AvgVal	74	0.3420	0.3040	-12.500																										1	1	1	210	1.89434501144569	0.00600946473423392				ASRp
1	AvgVal	78	0.3110	0.3040	-2.3026																										1	1	1	211	1.89111929305363	0.00665460841264576				Chamber	Block ID	Trial ID	Period	Decibel	AvgVal	BlockId0	TrialId0
1	AvgVal	86	0.3150	0.3040	-3.6184																										1	1	1	212	1.89628044248093	0.00697718025185168				1	2	13	PrePulse	86	0	2	43
																															1	1	1	213	1.8895064338576	0.00665460841264576				1	2	13	Startle	120	0.0027	2	43
Chamber ID	DataType	Decibel	ASRp(%)	ASRc(%)	PPI Pct(%)																										1	1	1	214	1.89079672121443	0.00697718025185168				1	2	17	PrePulse	86	0	2	41
1	RmsVal	74	1.2350	2.7520	55.1235																										1	1	1	215	1.89079672121443	0.00665460841264576				1	2	17	Startle	120	0.0035	2	41
1	RmsVal	78	1.7060	2.7520	38.0087																										1	1	1	216	1.89273215224966	0.00665460841264576				1	2	21	PrePulse	86	0	2	49
1	RmsVal	86	0.8320	2.7520	69.7674																										1	1	1	217	1.89047414937522	0.00697718025185168				1	2	21	Startle	120	0.0031	2	49
																															1	1	1	218	1.89144186489284	0.00665460841264576				1	2	23	PrePulse	86	0	2	44
Chamber ID	DataType	Decibel	ASRp(%)	ASRc(%)	PPI Pct(%)																										1	1	1	219	1.89111929305363	0.00633203657343984				1	2	23	Startle	120	0.0025	2	44
1	StdevVal	74	1.1800	2.7430	56.9814																										1	1	1	220	1.89305472408887	0.00665460841264576				1	2	31	PrePulse	86	0	2	42
1	StdevVal	78	1.6820	2.7430	38.6803																										1	1	1	221	1.89079672121443	0.0072997520910576				1	2	31	Startle	120	0.0052	2	42
1	StdevVal	86	0.7650	2.7430	72.1108																										1	1	1	222	1.88982900569681	0.00697718025185168				1	2	32	PrePulse	86	0	2	47
																															1	1	1	223	1.88692585914396	0.0072997520910576				1	2	32	Startle	120	0.0035	2	47
Chamber ID	Block ID	Trial ID	Period	Peak Value	Peak Time	Latency	Total Value	TotalAbsolute Value	AvgAbsolute Value	ARS Stdev	Avg Value	Rms Value	Start	End	PeriodCnt	Db	BlockId0	TrialId0													1	1	1	224	1.88789357466158	0.00697718025185168				1	2	47	PrePulse	86	0	2	46
2	1	1	Null	0	0	0	0	0	0	0	0	0	0	0	0	0	1	1													1	1	1	225	1.89305472408887	0.00697718025185168				1	2	47	Startle	120	0.0024	2	46
2	1	1	Startle	0.4223	25	24	-0.4515	16.6427	0.1648	0.2439	-0.0045	0.2427	1	40	40	120	1	1													1	1	1	226	1.88628071546555	0.00633203657343984				1	2	48	PrePulse	86	0	2	48
2	1	2	Null	0	0	0	0	0	0	0	0	0	0	0	0	0	1	2													1	1	1	227	1.88821614650078	0.00697718025185168				1	2	48	Startle	120	0.0026	2	48
2	1	2	Startle	0.7355	21	20	0.0372	18.1173	0.1794	0.2720	0.0004	0.2706	1	40	40	120	1	2													1	1	1	228	1.88789357466158	0.00697718025185168				1	2	56	PrePulse	86	0	2	45
2	1	3	Null	0	0	0	0	0	0	0	0	0	0	0	0	0	1	3													1	1	1	229	1.89273215224966	0.00665460841264576				1	2	56	Startle	120	0.0032	2	45
2	1	3	Startle	0.5919	22	21	-0.1918	13.2258	0.1309	0.1989	-0.0019	0.1980	1	40	40	120	1	3													1	1	1	230	1.8895064338576	0.00697718025185168				1	2	57	PrePulse	86	0	2	50
2	1	4	Null	0	0	0	0	0	0	0	0	0	0	0	0	0	1	4													1	1	1	231	1.89079672121443	0.00665460841264576				1	2	57	Startle	120	0.0028	2	50
2	1	4	Startle	0.2587	21	20	-0.4773	5.5109	0.0546	0.0845	-0.0047	0.0842	1	40	40	120	1	4													1	1	1	232	1.8895064338576	0.00665460841264576
2	1	5	Null	0	0	0	0	0	0	0	0	0	0	0	0	0	1	5													1	1	1	233	1.89015157753602	0.0072997520910576				ASRc
2	1	5	Startle	0.4442	21	20	-0.4199	9.6592	0.0956	0.1450	-0.0042	0.1444	1	40	40	120	1	5													1	1	1	234	1.88724843098316	0.00665460841264576				Chamber	Block ID	Trial ID	Period	Decibel	AvgVal	BlockId0	TrialId0
2	1	6	Null	0	0	0	0	0	0	0	0	0	0	0	0	0	1	6													1	1	1	235	1.88595814362634	0.00697718025185168				1	2	4	Startle	120	0.0038	2	17
2	1	6	Startle	0.4316	20	19	0.2285	8.4301	0.0835	0.1319	0.0023	0.1312	1	40	40	120	1	6													1	1	1	236	1.8840227125911	0.0072997520910576				1	2	9	Startle	120	0.0046	2	14
2	1	7	Null	0	0	0	0	0	0	0	0	0	0	0	0	0	1	7													1	1	1	237	1.88499042810872	0.00697718025185168				1	2	12	Startle	120	0.0021	2	11
2	1	7	Startle	0.4461	21	20	0.0114	7.8982	0.0782	0.1270	0.0001	0.1264	1	40	40	120	1	7													1	1	1	238	1.88628071546555	0.00697718025185168				1	2	18	Startle	120	-0.0005	2	13
2	1	8	Null	0	0	0	0	0	0	0	0	0	0	0	0	0	1	8													1	1	1	239	1.88531299994793	0.00697718025185168				1	2	25	Startle	120	0.0028	2	18
2	1	8	Startle	0.5652	21	20	0.7324	13.3275	0.1320	0.1905	0.0073	0.1897	1	40	40	120	1	8													1	1	1	240	1.88982900569681	0.0072997520910576				1	2	43	Startle	120	0.0039	2	19
2	1	9	Null	0	0	0	0	0	0	0	0	0	0	0	0	0	1	9													1	1	1	241	1.8891838620184	0.00697718025185168				1	2	46	Startle	120	0.0032	2	15
2	1	9	Startle	0.7400	20	19	0.6917	20.4099	0.2021	0.2914	0.0068	0.2901	1	40	40	120	1	9													1	1	1	242	1.89208700857125	0.0072997520910576				1	2	50	Startle	120	0.0035	2	12
2	1	10	Null	0	0	0	0	0	0	0	0	0	0	0	0	0	1	10													1	1	1	243	1.89369986776728	0.00665460841264576				1	2	51	Startle	120	0.0041	2	20
2	1	10	Startle	0.4781	22	21	0.6624	10.7809	0.1067	0.1562	0.0066	0.1556	1	40	40	120	1	10													1	1	1	244	1.89789330167696	0.00697718025185168				1	2	53	Startle	120	0.0029	2	16
2	2	1	Null	0	0	0	0	0	0	0	0	0	0	0	0	0	2	30													1	1	1	245	1.8946675832849	0.00697718025185168
2	2	1	PrePulse	0.0577	28	27	0.2140	1.5613	0.0155	0.0214	0.0021	0.0214	1	20	20	74	2	30													1	1	1	246	1.89563529880252	0.00697718025185168				PPI Pct
2	2	1	Startle	0.1519	145	24	0.4182	3.5968	0.0356	0.0533	0.0041	0.0532	121	160	40	120	2	30													1	1	1	247	1.89337729592808	0.00794489576946944				Chamber	Type	Details	Result
2	2	2	Null	0	0	0	0	0	0	0	0	0	0	0	0	0	2	25													1	1	1	248	1.89628044248093	0.0072997520910576				1	ASRp	((0.0027 +0.0035 +0.0031 +0.0025 +0.0052 +0.0035 +0.0024 +0.0026 +0.0032 +0.0028)/10)*100	0.3150
2	2	2	PrePulse	0.0532	25	24	0.0672	1.9878	0.0197	0.0275	0.0007	0.0274	1	20	20	74	2	25													1	1	1	249	1.89305472408887	0.0072997520910576				1	ASRc	((0.0038 +0.0046 +0.0021 +-0.0005 +0.0028 +0.0039 +0.0032 +0.0035 +0.0041 +0.0029)/10)*100	0.3040
2	2	2	Startle	0.1255	184	63	0.1682	5.3565	0.0530	0.0697	0.0017	0.0694	121	160	40	120	2	25													1	1	1	250	1.89369986776728	0.00633203657343984				1	PPI Pct	(ASRc - ASRp)/ASRc	-3.6184
2	2	3	Null	0	0	0	0	0	0	0	0	0	0	0	0	0	2	28													1	1	1	251	1.89305472408887	0.00665460841264576
2	2	3	PrePulse	0.0390	32	31	0.0495	1.1887	0.0118	0.0155	0.0005	0.0155	1	20	20	74	2	28													1	1	1	252	1.89402243960649	0.00665460841264576				ASRp
2	2	3	Startle	0.2071	143	22	0.5666	5.1001	0.0505	0.0701	0.0056	0.0699	121	160	40	120	2	28													1	1	1	253	1.90273187926505	0.00665460841264576				Chamber	Block ID	Trial ID	Period	Decibel	RmsVal	BlockId0	TrialId0
2	2	4	Null	0	0	0	0	0	0	0	0	0	0	0	0	0	2	17													1	1	1	254	1.89337729592808	0.00697718025185168				1	2	1	PrePulse	74	0	2	30
2	2	4	Startle	0.6103	141	20	-0.4005	11.1778	0.1107	0.1807	-0.0040	0.1799	121	160	40	120	2	17													1	1	1	255	1.89692558615934	0.00697718025185168				1	2	1	Startle	120	0.0247	2	30
2	2	5	Null	0	0	0	0	0	0	0	0	0	0	0	0	0	2	34													1	1	1	256	1.89337729592808	0.00600946473423392				1	2	2	PrePulse	74	0	2	25
2	2	5	PrePulse	0.0123	76	75	-0.1557	0.6015	0.0060	0.0072	-0.0015	0.0073	1	20	20	78	2	34													1	1	1	257	1.89531272696331	0.00536432105582207				1	2	2	Startle	120	0.0067	2	25
2	2	5	Startle	0.2068	144	23	-0.0612	4.8683	0.0482	0.0717	-0.0006	0.0713	121	160	40	120	2	34													1	1	1	258	1.8895064338576	0.00633203657343984				1	2	3	PrePulse	74	0	2	28
2	2	6	Null	0	0	0	0	0	0	0	0	0	0	0	0	0	2	35													1	1	1	259	1.8895064338576	0.00697718025185168				1	2	3	Startle	120	0.0151	2	28
2	2	6	PrePulse	0.0132	79	78	-0.0667	0.4576	0.0045	0.0054	-0.0007	0.0054	1	20	20	78	2	35													1	1	1	260	1.8891838620184	0.00665460841264576				1	2	7	PrePulse	74	0	2	22
2	2	6	Startle	0.0868	144	23	0.1401	2.0146	0.0199	0.0290	0.0014	0.0289	121	160	40	120	2	35													1	1	1	261	1.89015157753602	0.00697718025185168				1	2	7	Startle	120	0.0083	2	22
2	2	7	Null	0	0	0	0	0	0	0	0	0	0	0	0	0	2	22													1	1	1	262	1.8891838620184	0.00697718025185168				1	2	11	PrePulse	74	0	2	27
2	2	7	PrePulse	0.0239	27	26	0.2372	1.1722	0.0116	0.0138	0.0023	0.0139	1	20	20	74	2	22													1	1	1	263	1.89047414937522	0.00665460841264576				1	2	11	Startle	120	0.0156	2	27
2	2	7	Startle	0.2032	142	21	0.6243	6.0294	0.0597	0.0826	0.0062	0.0824	121	160	40	120	2	22													1	1	1	264	1.8895064338576	0.00697718025185168				1	2	24	PrePulse	74	0	2	24
2	2	8	Null	0	0	0	0	0	0	0	0	0	0	0	0	0	2	5													1	1	1	265	1.89047414937522	0.0072997520910576				1	2	24	Startle	120	0.0183	2	24
2	2	8	PrePulse	0.0323	35	34	-0.2415	1.3434	0.0133	0.0158	-0.0024	0.0159	1	20	20	66	2	5													1	1	1	266	1.89079672121443	0.0072997520910576				1	2	26	PrePulse	74	0	2	29
2	2	9	Null	0	0	0	0	0	0	0	0	0	0	0	0	0	2	14													1	1	1	267	1.88789357466158	0.0072997520910576				1	2	26	Startle	120	0.0094	2	29
2	2	9	Startle	0.1829	144	23	-0.2434	4.5234	0.0448	0.0645	-0.0024	0.0642	121	160	40	120	2	14													1	1	1	268	1.89079672121443	0.00697718025185168				1	2	28	PrePulse	74	0	2	26
2	2	10	Null	0	0	0	0	0	0	0	0	0	0	0	0	0	2	52													1	1	1	269	1.88466785626952	0.00633203657343984				1	2	28	Startle	120	0.0121	2	26
2	2	10	PrePulse	0.0213	35	34	0.0759	0.8313	0.0082	0.0106	0.0008	0.0105	1	20	20	74	2	52													1	1	1	270	1.88724843098316	0.00600946473423392				1	2	40	PrePulse	74	0	2	23
2	2	11	Null	0	0	0	0	0	0	0	0	0	0	0	0	0	2	27													1	1	1	271	1.88499042810872	0.00665460841264576				1	2	40	Startle	120	0.0067	2	23
2	2	11	PrePulse	0.1171	94	93	0.6549	2.9959	0.0297	0.0430	0.0065	0.0432	1	20	20	74	2	27													1	1	1	272	1.88724843098316	0.0072997520910576				1	2	59	PrePulse	74	0	2	21
2	2	11	Startle	0.0565	143	22	0.0111	1.7814	0.0176	0.0230	0.0001	0.0228	121	160	40	120	2	27													1	1	1	273	1.88531299994793	0.00665460841264576				1	2	59	Startle	120	0.0066	2	21
2	2	12	Null	0	0	0	0	0	0	0	0	0	0	0	0	0	2	11													1	1	1	274	1.88821614650078	0.00697718025185168
2	2	12	Startle	0.2190	140	19	-0.0831	8.2301	0.0815	0.1021	-0.0008	0.1016	121	160	40	120	2	11													1	1	1	275	1.88886129017919	0.00697718025185168				ASRc
2	2	13	Null	0	0	0	0	0	0	0	0	0	0	0	0	0	2	43													1	1	1	276	1.89273215224966	0.00665460841264576				Chamber	Block ID	Trial ID	Period	Decibel	RmsVal	BlockId0	TrialId0
2	2	13	PrePulse	0.2816	23	22	-0.0431	5.7288	0.0567	0.0883	-0.0004	0.0879	1	20	20	86	2	43													1	1	1	277	1.89079672121443	0.00697718025185168				1	2	4	Startle	120	0.0162	2	17
2	2	13	Startle	0.0207	157	36	-0.4644	1.0205	0.0101	0.0123	-0.0046	0.0131	121	160	40	120	2	43													1	1	1	278	1.89240958041046	0.00697718025185168				1	2	9	Startle	120	0.0482	2	14
2	2	14	Null	0	0	0	0	0	0	0	0	0	0	0	0	0	2	2													1	1	1	279	1.89369986776728	0.0072997520910576				1	2	12	Startle	120	0.0156	2	11
2	2	14	PrePulse	0.0636	47	46	-0.0105	2.4918	0.0247	0.0309	-0.0001	0.0307	1	20	20	66	2	2													1	1	1	280	1.89240958041046	0.00697718025185168				1	2	18	Startle	120	0.0220	2	13
2	2	15	Null	0	0	0	0	0	0	0	0	0	0	0	0	0	2	6													1	1	1	281	1.89918358903378	0.00697718025185168				1	2	25	Startle	120	0.0201	2	18
2	2	15	PrePulse	0.0271	36	35	0.3143	0.7905	0.0078	0.0093	0.0031	0.0097	1	20	20	66	2	6													1	1	1	282	1.8891838620184	0.00697718025185168				1	2	43	Startle	120	0.0631	2	19
2	2	16	Null	0	0	0	0	0	0	0	0	0	0	0	0	0	2	31													1	1	1	283	1.88853871833999	0.00665460841264576				1	2	46	Startle	120	0.0152	2	15
2	2	16	PrePulse	0.1387	24	23	0.0679	2.9827	0.0295	0.0440	0.0007	0.0438	1	20	20	78	2	31													1	1	1	284	1.88853871833999	0.00665460841264576				1	2	50	Startle	120	0.0178	2	12
2	2	16	Startle	0.2194	143	22	0.1788	6.3779	0.0631	0.0824	0.0018	0.0820	121	160	40	120	2	31													1	1	1	285	1.89111929305363	0.00697718025185168				1	2	51	Startle	120	0.0151	2	20
2	2	17	Null	0	0	0	0	0	0	0	0	0	0	0	0	0	2	41													1	1	1	286	1.88886129017919	0.00633203657343984				1	2	53	Startle	120	0.0419	2	16
2	2	17	PrePulse	0.2036	25	24	-0.2431	4.7908	0.0474	0.0705	-0.0024	0.0702	1	20	20	86	2	41													1	1	1	287	1.8895064338576	0.00762232393026352
2	2	17	Startle	0.0616	144	23	0.2556	1.7483	0.0173	0.0233	0.0025	0.0233	121	160	40	120	2	41													1	1	1	288	1.88853871833999	0.00697718025185168				PPI Pct
2	2	18	Null	0	0	0	0	0	0	0	0	0	0	0	0	0	2	13													1	1	1	289	1.89144186489284	0.00697718025185168				Chamber	Type	Details	Result
2	2	18	Startle	0.3690	142	21	0.1608	7.5552	0.0748	0.1140	0.0016	0.1134	121	160	40	120	2	13													1	1	1	290	1.88982900569681	0.0072997520910576				1	ASRp	((0.0247 +0.0067 +0.0151 +0.0083 +0.0156 +0.0183 +0.0094 +0.0121 +0.0067 +0.0066)/10)*100	1.2350
2	2	19	Null	0	0	0	0	0	0	0	0	0	0	0	0	0	2	40													1	1	1	291	1.89208700857125	0.00665460841264576				1	ASRc	((0.0162 +0.0482 +0.0156 +0.0220 +0.0201 +0.0631 +0.0152 +0.0178 +0.0151 +0.0419)/10)*100	2.7520
2	2	19	PrePulse	0.0236	81	80	0.1530	0.8860	0.0088	0.0110	0.0015	0.0110	1	20	20	78	2	40													1	1	1	292	1.89144186489284	0.0072997520910576				1	PPI Pct	(ASRc - ASRp)/ASRc	55.1235
2	2	19	Startle	0.2868	142	21	0.1856	4.9723	0.0492	0.0805	0.0018	0.0801	121	160	40	120	2	40													1	1	1	293	1.89273215224966	0.00697718025185168
2	2	20	Null	0	0	0	0	0	0	0	0	0	0	0	0	0	2	33													1	1	1	294	1.89789330167696	0.0072997520910576				ASRp
2	2	20	PrePulse	0.0190	32	31	0.1053	0.6426	0.0064	0.0077	0.0010	0.0078	1	20	20	78	2	33													1	1	1	295	1.89273215224966	0.00665460841264576				Chamber	Block ID	Trial ID	Period	Decibel	RmsVal	BlockId0	TrialId0
2	2	20	Startle	0.1497	143	22	0.1443	3.1200	0.0309	0.0453	0.0014	0.0451	121	160	40	120	2	33													1	1	1	296	1.89660301432014	0.00665460841264576				1	2	5	PrePulse	78	0	2	34
2	2	21	Null	0	0	0	0	0	0	0	0	0	0	0	0	0	2	49													1	1	1	297	1.89402243960649	0.0072997520910576				1	2	5	Startle	120	0.0215	2	34
2	2	21	PrePulse	0.2048	23	22	0.0704	4.9282	0.0488	0.0702	0.0007	0.0699	1	20	20	86	2	49													1	1	1	298	1.89886101719458	0.0072997520910576				1	2	6	PrePulse	78	0	2	35
2	2	21	Startle	0.0387	171	50	0.1569	1.2078	0.0120	0.0158	0.0016	0.0158	121	160	40	120	2	49													1	1	1	299	1.89660301432014	0.00697718025185168				1	2	6	Startle	120	0.0154	2	35
2	2	22	Null	0	0	0	0	0	0	0	0	0	0	0	0	0	2	9													1	1	1	300	1.90047387639061	0.00665460841264576				1	2	16	PrePulse	78	0	2	31
2	2	22	PrePulse	0.0116	49	48	0.1485	0.3429	0.0034	0.0040	0.0015	0.0043	1	20	20	66	2	9													1	1	1	301	1.89821587351616	0.00665460841264576				1	2	16	Startle	120	0.0180	2	31
2	2	23	Null	0	0	0	0	0	0	0	0	0	0	0	0	0	2	44													1	1	1	302	1.89853844535537	0.00665460841264576				1	2	19	PrePulse	78	0	2	40
2	2	23	PrePulse	0.2397	22	21	-0.0741	5.9186	0.0586	0.0837	-0.0007	0.0833	1	20	20	86	2	44													1	1	1	303	1.89563529880252	0.00697718025185168				1	2	19	Startle	120	0.0100	2	40
2	2	23	Startle	0.0365	158	37	0.3059	1.8130	0.0180	0.0211	0.0030	0.0212	121	160	40	120	2	44													1	1	1	304	1.89337729592808	0.0072997520910576				1	2	20	PrePulse	78	0	2	33
2	2	24	Null	0	0	0	0	0	0	0	0	0	0	0	0	0	2	24													1	1	1	305	1.88982900569681	0.00665460841264576				1	2	20	Startle	120	0.0185	2	33
2	2	24	PrePulse	0.0203	34	33	0.0588	0.7677	0.0076	0.0101	0.0006	0.0101	1	20	20	74	2	24													1	1	1	306	1.8895064338576	0.0072997520910576				1	2	29	PrePulse	78	0	2	36
2	2	24	Startle	0.1526	142	21	-0.0708	3.2694	0.0324	0.0470	-0.0007	0.0468	121	160	40	120	2	24													1	1	1	307	1.88853871833999	0.00633203657343984				1	2	29	Startle	120	0.0170	2	36
2	2	25	Null	0	0	0	0	0	0	0	0	0	0	0	0	0	2	18													1	1	1	308	1.88789357466158	0.0072997520910576				1	2	30	PrePulse	78	0	2	38
2	2	25	Startle	0.2545	141	20	-0.2573	5.2159	0.0516	0.0783	-0.0025	0.0779	121	160	40	120	2	18													1	1	1	309	1.89273215224966	0.0072997520910576				1	2	30	Startle	120	0.0156	2	38
2	2	26	Null	0	0	0	0	0	0	0	0	0	0	0	0	0	2	29													1	1	1	310	1.88724843098316	0.00665460841264576				1	2	33	PrePulse	78	0	2	39
2	2	26	PrePulse	0.0281	50	49	0.1104	0.8302	0.0082	0.0107	0.0011	0.0107	1	20	20	74	2	29													1	1	1	311	1.8895064338576	0.00697718025185168				1	2	33	Startle	120	0.0303	2	39
2	2	26	Startle	0.1800	141	20	0.2069	4.3460	0.0430	0.0611	0.0020	0.0608	121	160	40	120	2	29													1	1	1	312	1.8895064338576	0.00665460841264576				1	2	44	PrePulse	78	0	2	32
2	2	27	Null	0	0	0	0	0	0	0	0	0	0	0	0	0	2	4													1	1	1	313	1.89305472408887	0.0072997520910576				1	2	44	Startle	120	0.0153	2	32
2	2	27	PrePulse	0.0245	9	8	0.2330	0.6609	0.0065	0.0083	0.0023	0.0085	1	20	20	66	2	4													1	1	1	314	1.88982900569681	0.00697718025185168				1	2	55	PrePulse	78	0	2	37
2	2	28	Null	0	0	0	0	0	0	0	0	0	0	0	0	0	2	26													1	1	1	315	1.89079672121443	0.00665460841264576				1	2	55	Startle	120	0.0090	2	37
2	2	28	PrePulse	0.0136	18	17	0.1582	0.4775	0.0047	0.0056	0.0016	0.0058	1	20	20	74	2	26													1	1	1	316	1.88821614650078	0.00697718025185168
2	2	28	Startle	0.0632	143	22	-0.1270	1.8438	0.0183	0.0235	-0.0013	0.0234	121	160	40	120	2	26													1	1	1	317	1.89144186489284	0.00697718025185168				ASRc
2	2	29	Null	0	0	0	0	0	0	0	0	0	0	0	0	0	2	36													1	1	1	318	1.88853871833999	0.00665460841264576				Chamber	Block ID	Trial ID	Period	Decibel	RmsVal	BlockId0	TrialId0
2	2	29	PrePulse	0.0432	46	45	0.2356	1.2186	0.0121	0.0161	0.0023	0.0162	1	20	20	78	2	36													1	1	1	319	1.89047414937522	0.00665460841264576				1	2	4	Startle	120	0.0162	2	17
2	2	29	Startle	0.0881	142	21	-0.1983	2.2356	0.0221	0.0310	-0.0020	0.0309	121	160	40	120	2	36													1	1	1	320	1.88789357466158	0.00633203657343984				1	2	9	Startle	120	0.0482	2	14
2	2	30	Null	0	0	0	0	0	0	0	0	0	0	0	0	0	2	38													1	1	1	321	1.88886129017919	0.0072997520910576				1	2	12	Startle	120	0.0156	2	11
2	2	30	PrePulse	0.0452	36	35	0.0924	1.8098	0.0179	0.0228	0.0009	0.0227	1	20	20	78	2	38													1	1	1	322	1.89724815799855	0.00697718025185168				1	2	18	Startle	120	0.0220	2	13
2	2	30	Startle	0.1790	143	22	-0.0283	5.3153	0.0526	0.0703	-0.0003	0.0699	121	160	40	120	2	38													1	1	1	323	1.89015157753602	0.00697718025185168				1	2	25	Startle	120	0.0201	2	18
2	2	31	Null	0	0	0	0	0	0	0	0	0	0	0	0	0	2	42													1	1	1	324	1.89240958041046	0.0072997520910576				1	2	43	Startle	120	0.0631	2	19
2	2	31	PrePulse	0.1506	26	25	0.3820	4.8794	0.0483	0.0632	0.0038	0.0630	1	20	20	86	2	42													1	1	1	325	1.89015157753602	0.00697718025185168				1	2	46	Startle	120	0.0152	2	15
2	2	31	Startle	0.0548	144	23	0.1575	2.1232	0.0210	0.0280	0.0016	0.0279	121	160	40	120	2	42													1	1	1	326	1.89208700857125	0.00697718025185168				1	2	50	Startle	120	0.0178	2	12
2	2	32	Null	0	0	0	0	0	0	0	0	0	0	0	0	0	2	47													1	1	1	327	1.88724843098316	0.0072997520910576				1	2	51	Startle	120	0.0151	2	20
2	2	32	PrePulse	0.0648	94	93	0.2653	3.3860	0.0335	0.0428	0.0026	0.0427	1	20	20	86	2	47													1	1	1	328	1.88531299994793	0.00697718025185168				1	2	53	Startle	120	0.0419	2	16
2	2	32	Startle	0.0581	186	65	0.0359	2.5131	0.0249	0.0309	0.0004	0.0307	121	160	40	120	2	47													1	1	1	329	1.8837001407519	0.00633203657343984
2	2	33	Null	0	0	0	0	0	0	0	0	0	0	0	0	0	2	39													1	1	1	330	1.88466785626952	0.00633203657343984				PPI Pct
2	2	33	PrePulse	0.0261	64	63	0.0801	1.0510	0.0104	0.0136	0.0008	0.0136	1	20	20	78	2	39													1	1	1	331	1.88499042810872	0.0072997520910576				Chamber	Type	Details	Result
2	2	33	Startle	0.1748	141	20	0.7911	5.6168	0.0556	0.0699	0.0078	0.0700	121	160	40	120	2	39													1	1	1	332	1.88660328730475	0.00665460841264576				1	ASRp	((0.0215 +0.0154 +0.0180 +0.0100 +0.0185 +0.0170 +0.0156 +0.0303 +0.0153 +0.0090)/10)*100	1.7060
2	2	34	Null	0	0	0	0	0	0	0	0	0	0	0	0	0	2	59													1	1	1	333	1.88692585914396	0.0072997520910576				1	ASRc	((0.0162 +0.0482 +0.0156 +0.0220 +0.0201 +0.0631 +0.0152 +0.0178 +0.0151 +0.0419)/10)*100	2.7520
2	2	34	PrePulse	0.1513	23	22	0.0037	5.8415	0.0578	0.0820	0.0000	0.0815	1	20	20	86	2	59													1	1	1	334	1.88789357466158	0.00600946473423392				1	PPI Pct	(ASRc - ASRp)/ASRc	38.0087
2	2	35	Null	0	0	0	0	0	0	0	0	0	0	0	0	0	2	7													1	1	1	335	1.88853871833999	0.0072997520910576
2	2	35	PrePulse	0.0277	53	52	0.1717	1.1776	0.0117	0.0138	0.0017	0.0138	1	20	20	66	2	7													1	1	1	336	1.8891838620184	0.00665460841264576				ASRp
2	2	36	Null	0	0	0	0	0	0	0	0	0	0	0	0	0	2	57													1	1	1	337	1.89337729592808	0.0072997520910576				Chamber	Block ID	Trial ID	Period	Decibel	RmsVal	BlockId0	TrialId0
2	2	36	PrePulse	0.1455	21	20	0.1424	4.6440	0.0460	0.0579	0.0014	0.0576	1	20	20	86	2	57													1	1	1	338	1.8895064338576	0.0072997520910576				1	2	13	PrePulse	86	0	2	43
2	2	37	Null	0	0	0	0	0	0	0	0	0	0	0	0	0	2	8													1	1	1	339	1.89111929305363	0.0072997520910576				1	2	13	Startle	120	0.0061	2	43
2	2	37	PrePulse	0.0126	32	31	0.1062	0.4972	0.0049	0.0058	0.0011	0.0059	1	20	20	66	2	8													1	1	1	340	1.88982900569681	0.00697718025185168				1	2	17	PrePulse	86	0	2	41
2	2	38	Null	0	0	0	0	0	0	0	0	0	0	0	0	0	2	54													1	1	1	341	1.8946675832849	0.00665460841264576				1	2	17	Startle	120	0.0065	2	41
2	2	38	PrePulse	0.0261	13	12	0.1562	0.8987	0.0089	0.0110	0.0015	0.0111	1	20	20	78	2	54													1	1	1	342	1.8891838620184	0.00665460841264576				1	2	21	PrePulse	86	0	2	49
2	2	39	Null	0	0	0	0	0	0	0	0	0	0	0	0	0	2	58													1	1	1	343	1.89176443673205	0.00697718025185168				1	2	21	Startle	120	0.0097	2	49
2	2	39	PrePulse	0.2668	25	24	-0.3434	5.4485	0.0539	0.0863	-0.0034	0.0859	1	20	20	86	2	58													1	1	1	344	1.8895064338576	0.00762232393026352				1	2	23	PrePulse	86	0	2	44
2	2	40	Null	0	0	0	0	0	0	0	0	0	0	0	0	0	2	23													1	1	1	345	1.89240958041046	0.00665460841264576				1	2	23	Startle	120	0.0059	2	44
2	2	40	PrePulse	0.0310	54	53	-0.3857	1.1965	0.0118	0.0145	-0.0038	0.0149	1	20	20	74	2	23													1	1	1	346	1.89047414937522	0.00697718025185168				1	2	31	PrePulse	86	0	2	42
2	2	40	Startle	0.1719	142	21	-0.5960	3.8443	0.0381	0.0575	-0.0059	0.0576	121	160	40	120	2	23													1	1	1	347	1.89111929305363	0.00762232393026352				1	2	31	Startle	120	0.0183	2	42
2	2	41	Null	0	0	0	0	0	0	0	0	0	0	0	0	0	2	60													1	1	1	348	1.89015157753602	0.0072997520910576				1	2	32	PrePulse	86	0	2	47
2	2	41	PrePulse	0.2965	23	22	0.0292	5.7205	0.0566	0.0932	0.0003	0.0927	1	20	20	86	2	60													1	1	1	349	1.89047414937522	0.00697718025185168				1	2	32	Startle	120	0.0055	2	47
2	2	42	Null	0	0	0	0	0	0	0	0	0	0	0	0	0	2	10													1	1	1	350	1.89821587351616	0.00633203657343984				1	2	47	PrePulse	86	0	2	46
2	2	42	PrePulse	0.0242	83	82	0.1127	1.0308	0.0102	0.0134	0.0011	0.0134	1	20	20	66	2	10													1	1	1	351	1.88724843098316	0.00697718025185168				1	2	47	Startle	120	0.0102	2	46
2	2	43	Null	0	0	0	0	0	0	0	0	0	0	0	0	0	2	19													1	1	1	352	1.88821614650078	0.0072997520910576				1	2	48	PrePulse	86	0	2	48
2	2	43	Startle	0.2174	142	21	0.5540	6.3661	0.0630	0.0874	0.0055	0.0872	121	160	40	120	2	19													1	1	1	353	1.88595814362634	0.00697718025185168				1	2	48	Startle	120	0.0049	2	48
2	2	44	Null	0	0	0	0	0	0	0	0	0	0	0	0	0	2	32													1	1	1	354	1.88853871833999	0.0072997520910576				1	2	56	PrePulse	86	0	2	45
2	2	44	PrePulse	0.0223	9	8	0.2895	1.2063	0.0119	0.0141	0.0029	0.0143	1	20	20	78	2	32													1	1	1	355	1.88499042810872	0.00697718025185168				1	2	56	Startle	120	0.0086	2	45
2	2	44	Startle	0.1077	143	22	0.2514	3.0156	0.0299	0.0386	0.0025	0.0385	121	160	40	120	2	32													1	1	1	356	1.88628071546555	0.00633203657343984				1	2	57	PrePulse	86	0	2	50
2	2	45	Null	0	0	0	0	0	0	0	0	0	0	0	0	0	2	1													1	1	1	357	1.88563557178713	0.0072997520910576				1	2	57	Startle	120	0.0075	2	50
2	2	45	PrePulse	0.0203	31	30	0.0682	0.6630	0.0066	0.0081	0.0007	0.0081	1	20	20	66	2	1													1	1	1	358	1.88821614650078	0.0072997520910576
2	2	46	Null	0	0	0	0	0	0	0	0	0	0	0	0	0	2	15													1	1	1	359	1.88757100282237	0.00665460841264576				ASRc
2	2	46	Startle	0.3542	141	20	0.0453	7.2328	0.0716	0.1106	0.0004	0.1101	121	160	40	120	2	15													1	1	1	360	1.89111929305363	0.00762232393026352				Chamber	Block ID	Trial ID	Period	Decibel	RmsVal	BlockId0	TrialId0
2	2	47	Null	0	0	0	0	0	0	0	0	0	0	0	0	0	2	46													1	1	1	361	1.89015157753602	0.00665460841264576				1	2	4	Startle	120	0.0162	2	17
2	2	47	PrePulse	0.1042	56	55	-0.0854	2.9808	0.0295	0.0400	-0.0008	0.0398	1	20	20	86	2	46													1	1	1	362	1.89240958041046	0.00697718025185168				1	2	9	Startle	120	0.0482	2	14
2	2	47	Startle	0.0471	187	66	0.4204	1.7984	0.0178	0.0202	0.0042	0.0206	121	160	40	120	2	46													1	1	1	363	1.89402243960649	0.00762232393026352				1	2	12	Startle	120	0.0156	2	11
2	2	48	Null	0	0	0	0	0	0	0	0	0	0	0	0	0	2	48													1	1	1	364	1.89111929305363	0.00697718025185168				1	2	18	Startle	120	0.0220	2	13
2	2	48	PrePulse	0.2771	25	24	-0.5483	6.0359	0.0598	0.0904	-0.0054	0.0901	1	20	20	86	2	48													1	1	1	365	1.89369986776728	0.00665460841264576				1	2	25	Startle	120	0.0201	2	18
2	2	48	Startle	0.0671	206	85	0.0217	2.3770	0.0235	0.0308	0.0002	0.0306	121	160	40	120	2	48													1	1	1	366	1.8895064338576	0.00697718025185168				1	2	43	Startle	120	0.0631	2	19
2	2	49	Null	0	0	0	0	0	0	0	0	0	0	0	0	0	2	53													1	1	1	367	1.89273215224966	0.0072997520910576				1	2	46	Startle	120	0.0152	2	15
2	2	49	PrePulse	0.0268	48	47	0.2575	0.9252	0.0092	0.0108	0.0025	0.0111	1	20	20	74	2	53													1	1	1	368	1.89015157753602	0.00697718025185168				1	2	50	Startle	120	0.0178	2	12
2	2	50	Null	0	0	0	0	0	0	0	0	0	0	0	0	0	2	12													1	1	1	369	1.8946675832849	0.0072997520910576				1	2	51	Startle	120	0.0151	2	20
2	2	50	Startle	0.3155	141	20	-0.2786	7.1843	0.0711	0.1031	-0.0028	0.1027	121	160	40	120	2	12													1	1	1	370	1.89144186489284	0.00536432105582207				1	2	53	Startle	120	0.0419	2	16
2	2	51	Null	0	0	0	0	0	0	0	0	0	0	0	0	0	2	20													1	1	1	371	1.8946675832849	0.00697718025185168
2	2	51	Startle	0.2484	141	20	0.0688	7.9105	0.0783	0.1063	0.0007	0.1058	121	160	40	120	2	20													1	1	1	372	1.89337729592808	0.00633203657343984				PPI Pct
2	2	52	Null	0	0	0	0	0	0	0	0	0	0	0	0	0	2	55													1	1	1	373	1.89628044248093	0.00665460841264576				Chamber	Type	Details	Result
2	2	52	PrePulse	0.0352	40	39	-0.1241	1.5408	0.0153	0.0196	-0.0012	0.0196	1	20	20	78	2	55													1	1	1	374	1.89434501144569	0.00665460841264576				1	ASRp	((0.0061 +0.0065 +0.0097 +0.0059 +0.0183 +0.0055 +0.0102 +0.0049 +0.0086 +0.0075)/10)*100	0.8320
2	2	53	Null	0	0	0	0	0	0	0	0	0	0	0	0	0	2	16													1	1	1	375	1.89273215224966	0.00697718025185168				1	ASRc	((0.0162 +0.0482 +0.0156 +0.0220 +0.0201 +0.0631 +0.0152 +0.0178 +0.0151 +0.0419)/10)*100	2.7520
2	2	53	Startle	0.2971	141	20	0.5743	6.1297	0.0607	0.0924	0.0057	0.0922	121	160	40	120	2	16													1	1	1	376	1.8895064338576	0.00697718025185168				1	PPI Pct	(ASRc - ASRp)/ASRc	69.7674
2	2	54	Null	0	0	0	0	0	0	0	0	0	0	0	0	0	2	3													1	1	1	377	1.88757100282237	0.0072997520910576
2	2	54	PrePulse	0.0277	96	95	0.1988	1.2027	0.0119	0.0138	0.0020	0.0139	1	20	20	66	2	3													1	1	1	378	1.89531272696331	0.00665460841264576				ASRp
2	2	55	Null	0	0	0	0	0	0	0	0	0	0	0	0	0	2	37													1	1	1	379	1.88660328730475	0.0072997520910576				Chamber	Block ID	Trial ID	Period	Decibel	StdevVal	BlockId0	TrialId0
2	2	55	PrePulse	0.0568	51	50	0.0124	2.1537	0.0213	0.0309	0.0001	0.0307	1	20	20	78	2	37													1	1	1	380	1.88789357466158	0.00665460841264576				1	2	1	PrePulse	74	0	2	30
2	2	55	Startle	0.1729	141	20	0.0224	5.5507	0.0550	0.0801	0.0002	0.0797	121	160	40	120	2	37													1	1	1	381	1.88724843098316	0.00762232393026352				1	2	1	Startle	120	0.0236	2	30
2	2	56	Null	0	0	0	0	0	0	0	0	0	0	0	0	0	2	45													1	1	1	382	1.89079672121443	0.00665460841264576				1	2	2	PrePulse	74	0	2	25
2	2	56	PrePulse	0.1258	24	23	0.3085	4.1633	0.0412	0.0527	0.0031	0.0526	1	20	20	86	2	45													1	1	1	383	1.88821614650078	0.00633203657343984				1	2	2	Startle	120	0.0059	2	25
2	2	56	Startle	0.0323	160	39	0.3079	1.3118	0.0130	0.0159	0.0030	0.0161	121	160	40	120	2	45													1	1	1	384	1.88982900569681	0.00697718025185168				1	2	3	PrePulse	74	0	2	28
2	2	57	Null	0	0	0	0	0	0	0	0	0	0	0	0	0	2	50													1	1	1	385	1.88886129017919	0.00697718025185168				1	2	3	Startle	120	0.0151	2	28
2	2	57	PrePulse	0.2010	22	21	0.3043	5.5307	0.0548	0.0746	0.0030	0.0742	1	20	20	86	2	50													1	1	1	386	1.88982900569681	0.00697718025185168				1	2	7	PrePulse	74	0	2	22
2	2	57	Startle	0.0436	127	6	-0.0015	1.5440	0.0153	0.0181	0.0000	0.0180	121	160	40	120	2	50													1	1	1	387	1.88821614650078	0.0072997520910576				1	2	7	Startle	120	0.0076	2	22
2	2	58	Null	0	0	0	0	0	0	0	0	0	0	0	0	0	2	51													1	1	1	388	1.89015157753602	0.00697718025185168				1	2	11	PrePulse	74	0	2	27
2	2	58	PrePulse	0.0261	34	33	0.1850	0.8973	0.0089	0.0114	0.0018	0.0115	1	20	20	74	2	51													1	1	1	389	1.88821614650078	0.00665460841264576				1	2	11	Startle	120	0.0152	2	27
2	2	59	Null	0	0	0	0	0	0	0	0	0	0	0	0	0	2	21													1	1	1	390	1.8895064338576	0.00697718025185168				1	2	24	PrePulse	74	0	2	24
2	2	59	PrePulse	0.0294	37	36	0.1482	0.9893	0.0098	0.0117	0.0015	0.0117	1	20	20	74	2	21													1	1	1	391	1.8946675832849	0.00665460841264576				1	2	24	Startle	120	0.0182	2	24
2	2	59	Startle	0.0477	144	23	0.5262	2.4120	0.0239	0.0282	0.0052	0.0286	121	160	40	120	2	21													1	1	1	392	1.89079672121443	0.0072997520910576				1	2	26	PrePulse	74	0	2	29
2	2	60	Null	0	0	0	0	0	0	0	0	0	0	0	0	0	2	56													1	1	1	393	1.89434501144569	0.0072997520910576				1	2	26	Startle	120	0.0090	2	29
2	2	60	PrePulse	0.0384	62	61	-0.0834	1.5537	0.0154	0.0188	-0.0008	0.0187	1	20	20	78	2	56													1	1	1	394	1.89208700857125	0.00665460841264576				1	2	28	PrePulse	74	0	2	26
2	3	1	Null	0	0	0	0	0	0	0	0	0	0	0	0	0	3	1													1	1	1	395	1.89789330167696	0.00697718025185168				1	2	28	Startle	120	0.0118	2	26
2	3	1	Startle	0.4545	142	21	0.5640	7.8580	0.0778	0.1293	0.0056	0.1288	121	160	40	120	3	1													1	1	1	396	1.89434501144569	0.0072997520910576				1	2	40	PrePulse	74	0	2	23
2	3	2	Null	0	0	0	0	0	0	0	0	0	0	0	0	0	3	2													1	1	1	397	1.89757072983775	0.00633203657343984				1	2	40	Startle	120	0.0061	2	23
2	3	2	Startle	0.1968	141	20	0.0146	4.3969	0.0435	0.0704	0.0001	0.0700	121	160	40	120	3	2													1	1	1	398	1.89305472408887	0.0072997520910576				1	2	59	PrePulse	74	0	2	21
2	3	3	Null	0	0	0	0	0	0	0	0	0	0	0	0	0	3	3													1	1	1	399	1.89047414937522	0.0072997520910576				1	2	59	Startle	120	0.0055	2	21
2	3	3	Startle	0.0645	189	68	-0.2028	2.1957	0.0217	0.0293	-0.0020	0.0292	121	160	40	120	3	3													1	1	1	400	1.8895064338576	0.00697718025185168
2	3	4	Null	0	0	0	0	0	0	0	0	0	0	0	0	0	3	4													1	1	1	401	1.89079672121443	0.00762232393026352				ASRc
2	3	4	Startle	0.1316	142	21	0.4301	3.4965	0.0346	0.0477	0.0043	0.0477	121	160	40	120	3	4													1	1	1	402	1.88982900569681	0.00665460841264576				Chamber	Block ID	Trial ID	Period	Decibel	StdevVal	BlockId0	TrialId0
2	3	5	Null	0	0	0	0	0	0	0	0	0	0	0	0	0	3	5													1	1	1	403	1.88982900569681	0.0072997520910576				1	2	4	Startle	120	0.0158	2	17
2	3	5	Startle	0.2561	144	23	0.8682	7.7688	0.0769	0.1037	0.0086	0.1036	121	160	40	120	3	5													1	1	1	404	1.88982900569681	0.0072997520910576				1	2	9	Startle	120	0.0482	2	14
2	3	6	Null	0	0	0	0	0	0	0	0	0	0	0	0	0	3	6													1	1	1	405	1.8895064338576	0.00697718025185168				1	2	12	Startle	120	0.0156	2	11
2	3	6	Startle	0.1884	141	20	0.3359	3.7016	0.0366	0.0558	0.0033	0.0556	121	160	40	120	3	6													1	1	1	406	1.89531272696331	0.00665460841264576				1	2	18	Startle	120	0.0221	2	13
2	3	7	Null	0	0	0	0	0	0	0	0	0	0	0	0	0	3	7													1	1	1	407	1.8895064338576	0.00762232393026352				1	2	25	Startle	120	0.0200	2	18
2	3	7	Startle	0.0990	181	60	0.3737	2.9055	0.0288	0.0386	0.0037	0.0386	121	160	40	120	3	7													1	1	1	408	1.89176443673205	0.0072997520910576				1	2	43	Startle	120	0.0633	2	19
2	3	8	Null	0	0	0	0	0	0	0	0	0	0	0	0	0	3	8													1	1	1	409	1.88982900569681	0.00697718025185168				1	2	46	Startle	120	0.0150	2	15
2	3	8	Startle	0.4274	141	20	0.2317	7.9593	0.0788	0.1273	0.0023	0.1267	121	160	40	120	3	8													1	1	1	410	1.89305472408887	0.00665460841264576				1	2	50	Startle	120	0.0175	2	12
2	3	9	Null	0	0	0	0	0	0	0	0	0	0	0	0	0	3	9													1	1	1	411	1.88757100282237	0.00633203657343984				1	2	51	Startle	120	0.0147	2	20
2	3	9	Startle	0.2794	142	21	0.0882	5.6292	0.0557	0.0847	0.0009	0.0842	121	160	40	120	3	9													1	1	1	412	1.8895064338576	0.0072997520910576				1	2	53	Startle	120	0.0421	2	16
2	3	10	Null	0	0	0	0	0	0	0	0	0	0	0	0	0	3	10													1	1	1	413	1.88724843098316	0.00665460841264576
2	3	10	Startle	0.2868	142	21	-0.1734	7.3920	0.0732	0.1013	-0.0017	0.1008	121	160	40	120	3	10													1	1	1	414	1.89047414937522	0.0072997520910576				PPI Pct
																															1	1	1	415	1.88757100282237	0.00665460841264576				Chamber	Type	Details	Result
Chamber ID	DataType	Decibel	ASRp(%)	ASRc(%)	PPI Pct(%)																										1	1	1	416	1.89015157753602	0.00697718025185168				1	ASRp	((0.0236 +0.0059 +0.0151 +0.0076 +0.0152 +0.0182 +0.0090 +0.0118 +0.0061 +0.0055)/10)*100	1.1800
2	PeakVal	74	13.5960	30.6830	55.6888																										1	1	1	417	1.8891838620184	0.0072997520910576				1	ASRc	((0.0158 +0.0482 +0.0156 +0.0221 +0.0200 +0.0633 +0.0150 +0.0175 +0.0147 +0.0421)/10)*100	2.7430
2	PeakVal	78	16.7200	30.6830	45.5073																										1	1	1	418	1.89144186489284	0.0072997520910576				1	PPI Pct	(ASRc - ASRp)/ASRc	56.9814
2	PeakVal	86	4.6050	30.6830	84.9917																										1	1	1	419	1.89886101719458	0.00665460841264576
																															1	1	1	420	1.89111929305363	0.00697718025185168				ASRp
Chamber ID	DataType	Decibel	ASRp(%)	ASRc(%)	PPI Pct(%)																										1	1	1	421	1.8946675832849	0.00697718025185168				Chamber	Block ID	Trial ID	Period	Decibel	StdevVal	BlockId0	TrialId0
2	AvgVal	74	0.1700	0.0140	-1114.2857																										1	1	1	422	1.8895064338576	0.00633203657343984				1	2	5	PrePulse	78	0	2	34
2	AvgVal	78	0.1400	0.0140	-900																										1	1	1	423	1.89595787064172	0.00697718025185168				1	2	5	Startle	120	0.0214	2	34
2	AvgVal	86	0.1190	0.0140	-750.0																										1	1	1	424	1.89111929305363	0.0072997520910576				1	2	6	PrePulse	78	0	2	35
																															1	1	1	425	1.89337729592808	0.00697718025185168				1	2	6	Startle	120	0.0153	2	35
Chamber ID	DataType	Decibel	ASRp(%)	ASRc(%)	PPI Pct(%)																										1	1	1	426	1.89079672121443	0.00697718025185168				1	2	16	PrePulse	78	0	2	31
2	RmsVal	74	5.1490	10.3500	50.2512																										1	1	1	427	1.89111929305363	0.00697718025185168				1	2	16	Startle	120	0.0176	2	31
2	RmsVal	78	5.9640	10.3500	42.3768																										1	1	1	428	1.8895064338576	0.00697718025185168				1	2	19	PrePulse	78	0	2	40
2	RmsVal	86	2.1730	10.3500	79.0048																										1	1	1	429	1.89047414937522	0.005686892895028				1	2	19	Startle	120	0.0092	2	40
																															1	1	1	430	1.8891838620184	0.00697718025185168				1	2	20	PrePulse	78	0	2	33
Chamber ID	DataType	Decibel	ASRp(%)	ASRc(%)	PPI Pct(%)																										1	1	1	431	1.89047414937522	0.00633203657343984				1	2	20	Startle	120	0.0184	2	33
2	StdevVal	74	5.1600	10.3940	50.3560																										1	1	1	432	1.89015157753602	0.00697718025185168				1	2	29	PrePulse	78	0	2	36
2	StdevVal	78	5.9880	10.3940	42.3898																										1	1	1	433	1.88982900569681	0.00697718025185168				1	2	29	Startle	120	0.0169	2	36
2	StdevVal	86	2.1640	10.3940	79.1803																										1	1	1	434	1.89434501144569	0.00665460841264576				1	2	30	PrePulse	78	0	2	38
																															1	1	1	435	1.88982900569681	0.00633203657343984				1	2	30	Startle	120	0.0154	2	38
																															1	1	1	436	1.89240958041046	0.00762232393026352				1	2	33	PrePulse	78	0	2	39
																															1	1	1	437	1.89144186489284	0.00633203657343984				1	2	33	Startle	120	0.0302	2	39
																															1	1	1	438	1.89595787064172	0.00665460841264576				1	2	44	PrePulse	78	0	2	32
																															1	1	1	439	1.89305472408887	0.00859003944788128				1	2	44	Startle	120	0.0152	2	32
																															1	1	1	440	1.89692558615934	0.00665460841264576				1	2	55	PrePulse	78	0	2	37
																															1	1	1	441	1.89660301432014	0.00665460841264576				1	2	55	Startle	120	0.0086	2	37
																															1	1	1	442	1.90047387639061	0.00762232393026352
																															1	1	1	443	1.89724815799855	0.00697718025185168				ASRc
																															1	1	1	444	1.89595787064172	0.0072997520910576				Chamber	Block ID	Trial ID	Period	Decibel	StdevVal	BlockId0	TrialId0
																															1	1	1	445	1.89434501144569	0.00697718025185168				1	2	4	Startle	120	0.0158	2	17
																															1	1	1	446	1.89240958041046	0.0072997520910576				1	2	9	Startle	120	0.0482	2	14
																															1	1	1	447	1.89821587351616	0.00633203657343984				1	2	12	Startle	120	0.0156	2	11
																															1	1	1	448	1.88853871833999	0.005686892895028				1	2	18	Startle	120	0.0221	2	13
																															1	1	1	449	1.8895064338576	0.00665460841264576				1	2	25	Startle	120	0.0200	2	18
																															1	1	1	450	1.88531299994793	0.00665460841264576				1	2	43	Startle	120	0.0633	2	19
																															1	1	1	451	1.88789357466158	0.00665460841264576				1	2	46	Startle	120	0.0150	2	15
																															1	1	1	452	1.8837001407519	0.0072997520910576				1	2	50	Startle	120	0.0175	2	12
																															1	1	1	453	1.8840227125911	0.0072997520910576				1	2	51	Startle	120	0.0147	2	20
																															1	1	1	454	1.88337756891269	0.0072997520910576				1	2	53	Startle	120	0.0421	2	16
																															1	1	1	455	1.88692585914396	0.00859003944788128
																															1	1	1	456	1.88434528443031	0.00762232393026352				PPI Pct
																															1	1	1	457	1.88692585914396	0.005686892895028				Chamber	Type	Details	Result
																															1	1	1	458	1.88434528443031	0.0072997520910576				1	ASRp	((0.0214 +0.0153 +0.0176 +0.0092 +0.0184 +0.0169 +0.0154 +0.0302 +0.0152 +0.0086)/10)*100	1.6820
																															1	1	1	459	1.88724843098316	0.00697718025185168				1	ASRc	((0.0158 +0.0482 +0.0156 +0.0221 +0.0200 +0.0633 +0.0150 +0.0175 +0.0147 +0.0421)/10)*100	2.7430
																															1	1	1	460	1.88853871833999	0.00762232393026352				1	PPI Pct	(ASRc - ASRp)/ASRc	38.6803
																															1	1	1	461	1.88692585914396	0.00697718025185168
																															1	1	1	462	1.89111929305363	0.0072997520910576				ASRp
																															1	1	1	463	1.88821614650078	0.00697718025185168				Chamber	Block ID	Trial ID	Period	Decibel	StdevVal	BlockId0	TrialId0
																															1	1	1	464	1.89176443673205	0.00665460841264576				1	2	13	PrePulse	86	0	2	43
																															1	1	1	465	1.89079672121443	0.00697718025185168				1	2	13	Startle	120	0.0055	2	43
																															1	1	1	466	1.89434501144569	0.00697718025185168				1	2	17	PrePulse	86	0	2	41
																															1	1	1	467	1.89111929305363	0.00697718025185168				1	2	17	Startle	120	0.0055	2	41
																															1	1	1	468	1.89402243960649	0.00697718025185168				1	2	21	PrePulse	86	0	2	49
																															1	1	1	469	1.89015157753602	0.00762232393026352				1	2	21	Startle	120	0.0092	2	49
																															1	1	1	470	1.89176443673205	0.0072997520910576				1	2	23	PrePulse	86	0	2	44
																															1	1	1	471	1.88692585914396	0.00762232393026352				1	2	23	Startle	120	0.0054	2	44
																															1	1	1	472	1.88757100282237	0.00697718025185168				1	2	31	PrePulse	86	0	2	42
																															1	1	1	473	1.88595814362634	0.00697718025185168				1	2	31	Startle	120	0.0176	2	42
																															1	1	1	474	1.88563557178713	0.0072997520910576				1	2	32	PrePulse	86	0	2	47
																															1	1	1	475	1.89563529880252	0.00665460841264576				1	2	32	Startle	120	0.0042	2	47
																															1	1	1	476	1.88789357466158	0.00697718025185168				1	2	47	PrePulse	86	0	2	46
																															1	1	1	477	1.89079672121443	0.00665460841264576				1	2	47	Startle	120	0.0099	2	46
																															1	1	1	478	1.89079672121443	0.00633203657343984				1	2	48	PrePulse	86	0	2	48
																															1	1	1	479	1.89499015512411	0.00600946473423392				1	2	48	Startle	120	0.0042	2	48
																															1	1	1	480	1.89208700857125	0.00665460841264576				1	2	56	PrePulse	86	0	2	45
																															1	1	1	481	1.89305472408887	0.0072997520910576				1	2	56	Startle	120	0.0080	2	45
																															1	1	1	482	1.89144186489284	0.00762232393026352				1	2	57	PrePulse	86	0	2	50
																															1	1	1	483	1.89402243960649	0.00633203657343984				1	2	57	Startle	120	0.0070	2	50
																															1	1	1	484	1.89111929305363	0.00697718025185168
																															1	1	1	485	1.89369986776728	0.00697718025185168				ASRc
																															1	1	1	486	1.89337729592808	0.00665460841264576				Chamber	Block ID	Trial ID	Period	Decibel	StdevVal	BlockId0	TrialId0
																															1	1	1	487	1.89402243960649	0.00600946473423392				1	2	4	Startle	120	0.0158	2	17
																															1	1	1	488	1.89628044248093	0.00633203657343984				1	2	9	Startle	120	0.0482	2	14
																															1	1	1	489	1.89144186489284	0.00665460841264576				1	2	12	Startle	120	0.0156	2	11
																															1	1	1	490	1.89499015512411	0.00794489576946944				1	2	18	Startle	120	0.0221	2	13
																															1	1	1	491	1.89176443673205	0.0072997520910576				1	2	25	Startle	120	0.0200	2	18
																															1	1	1	492	1.89434501144569	0.0072997520910576				1	2	43	Startle	120	0.0633	2	19
																															1	1	1	493	1.88982900569681	0.0072997520910576				1	2	46	Startle	120	0.0150	2	15
																															1	1	1	494	1.89015157753602	0.00697718025185168				1	2	50	Startle	120	0.0175	2	12
																															1	1	1	495	1.88337756891269	0.00697718025185168				1	2	51	Startle	120	0.0147	2	20
																															1	1	1	496	1.88466785626952	0.00762232393026352				1	2	53	Startle	120	0.0421	2	16
																															1	1	1	497	1.8840227125911	0.00762232393026352
																															1	1	1	498	1.88692585914396	0.00697718025185168				PPI Pct
																															1	1	1	499	1.88692585914396	0.00633203657343984				Chamber	Type	Details	Result
																															1	1	1	500	1.88724843098316	0.00600946473423392				1	ASRp	((0.0055 +0.0055 +0.0092 +0.0054 +0.0176 +0.0042 +0.0099 +0.0042 +0.0080 +0.0070)/10)*100	0.7650
																															1	1	1	501	1.88789357466158	0.00697718025185168				1	ASRc	((0.0158 +0.0482 +0.0156 +0.0221 +0.0200 +0.0633 +0.0150 +0.0175 +0.0147 +0.0421)/10)*100	2.7430
																															1	1	1	502	1.88853871833999	0.0072997520910576				1	PPI Pct	(ASRc - ASRp)/ASRc	72.1108
																															1	1	1	503	1.89563529880252	0.0072997520910576
																															1	1	1	504	1.88757100282237	0.00697718025185168				ASRp
																															1	1	1	505	1.88982900569681	0.00665460841264576				Chamber	Block ID	Trial ID	Period	Decibel	PeakVal	BlockId0	TrialId0
																															1	1	1	506	1.88853871833999	0.00762232393026352				2	2	1	PrePulse	74	0	2	30
																															1	1	1	507	1.89337729592808	0.00665460841264576				2	2	1	Startle	120	0.1519	2	30
																															1	1	1	508	1.8891838620184	0.00697718025185168				2	2	2	PrePulse	74	0	2	25
																															1	1	1	509	1.89208700857125	0.00633203657343984				2	2	2	Startle	120	0.1255	2	25
																															1	1	1	510	1.88982900569681	0.00697718025185168				2	2	3	PrePulse	74	0	2	28
																															1	1	1	511	1.89305472408887	0.00665460841264576				2	2	3	Startle	120	0.2071	2	28
																															1	1	1	512	1.89144186489284	0.0072997520910576				2	2	7	PrePulse	74	0	2	22
																															1	1	1	513	1.89434501144569	0.00665460841264576				2	2	7	Startle	120	0.2032	2	22
																															1	1	1	514	1.89208700857125	0.00633203657343984				2	2	11	PrePulse	74	0	2	27
																															1	1	1	515	1.89337729592808	0.00794489576946944				2	2	11	Startle	120	0.0565	2	27
																															1	1	1	516	1.89531272696331	0.0072997520910576				2	2	24	PrePulse	74	0	2	24
																															1	1	1	517	1.88886129017919	0.00665460841264576				2	2	24	Startle	120	0.1526	2	24
																															1	1	1	518	1.89144186489284	0.00665460841264576				2	2	26	PrePulse	74	0	2	29
																															1	1	1	519	1.88757100282237	0.0072997520910576				2	2	26	Startle	120	0.1800	2	29
																															1	1	1	520	1.89176443673205	0.00633203657343984				2	2	28	PrePulse	74	0	2	26
																															1	1	1	521	1.88886129017919	0.00633203657343984				2	2	28	Startle	120	0.0632	2	26
																															1	1	1	522	1.89111929305363	0.00665460841264576				2	2	40	PrePulse	74	0	2	23
																															1	1	1	523	1.8895064338576	0.0072997520910576				2	2	40	Startle	120	0.1719	2	23
																															1	1	1	524	1.89079672121443	0.00665460841264576				2	2	59	PrePulse	74	0	2	21
																															1	1	1	525	1.88982900569681	0.00665460841264576				2	2	59	Startle	120	0.0477	2	21
																															1	1	1	526	1.89176443673205	0.00826746760867536
																															1	1	1	527	1.88886129017919	0.00697718025185168				ASRc
																															1	1	1	528	1.89047414937522	0.00697718025185168				Chamber	Block ID	Trial ID	Period	Decibel	PeakVal	BlockId0	TrialId0
																															1	1	1	529	1.89047414937522	0.00697718025185168				2	2	4	Startle	120	0.6103	2	17
																															1	1	1	530	1.89015157753602	0.00697718025185168				2	2	9	Startle	120	0.1829	2	14
																															1	1	1	531	1.89660301432014	0.00665460841264576				2	2	12	Startle	120	0.2190	2	11
																															1	1	1	532	1.89111929305363	0.0072997520910576				2	2	18	Startle	120	0.3690	2	13
																															1	1	1	533	1.89369986776728	0.00697718025185168				2	2	25	Startle	120	0.2545	2	18
																															1	1	1	534	1.89176443673205	0.0072997520910576				2	2	43	Startle	120	0.2174	2	19
																															1	1	1	535	1.89628044248093	0.0072997520910576				2	2	46	Startle	120	0.3542	2	15
																															1	1	1	536	1.89240958041046	0.00697718025185168				2	2	50	Startle	120	0.3155	2	12
																															1	1	1	537	1.89434501144569	0.00697718025185168				2	2	51	Startle	120	0.2484	2	20
																															1	1	1	538	1.89079672121443	0.0072997520910576				2	2	53	Startle	120	0.2971	2	16
																															1	1	1	539	1.89434501144569	0.00665460841264576
																															1	1	1	540	1.89079672121443	0.00665460841264576				PPI Pct
																															1	1	1	541	1.89079672121443	0.00600946473423392				Chamber	Type	Details	Result
																															1	1	1	542	1.8891838620184	0.0072997520910576				2	ASRp	((0.1519 +0.1255 +0.2071 +0.2032 +0.0565 +0.1526 +0.1800 +0.0632 +0.1719 +0.0477)/10)*100	13.5960
																															1	1	1	543	1.88757100282237	0.00697718025185168				2	ASRc	((0.6103 +0.1829 +0.2190 +0.3690 +0.2545 +0.2174 +0.3542 +0.3155 +0.2484 +0.2971)/10)*100	30.6830
																															1	1	1	544	1.8946675832849	0.00633203657343984				2	PPI Pct	(ASRc - ASRp)/ASRc	55.6888
																															1	1	1	545	1.88757100282237	0.00794489576946944
																															1	1	1	546	1.89047414937522	0.00665460841264576				ASRp
																															1	1	1	547	1.88886129017919	0.00665460841264576				Chamber	Block ID	Trial ID	Period	Decibel	PeakVal	BlockId0	TrialId0
																															1	1	1	548	1.89176443673205	0.00697718025185168				2	2	5	PrePulse	78	0	2	34
																															1	1	1	549	1.88853871833999	0.0072997520910576				2	2	5	Startle	120	0.2068	2	34
																															1	1	1	550	1.89015157753602	0.0072997520910576				2	2	6	PrePulse	78	0	2	35
																															1	1	1	551	1.88821614650078	0.00762232393026352				2	2	6	Startle	120	0.0868	2	35
																															1	1	1	552	1.88982900569681	0.00665460841264576				2	2	16	PrePulse	78	0	2	31
																															1	1	1	553	1.8891838620184	0.00633203657343984				2	2	16	Startle	120	0.2194	2	31
																															1	1	1	554	1.89240958041046	0.0072997520910576				2	2	19	PrePulse	78	0	2	40
																															1	1	1	555	1.89144186489284	0.00665460841264576				2	2	19	Startle	120	0.2868	2	40
																															1	1	1	556	1.89273215224966	0.00697718025185168				2	2	20	PrePulse	78	0	2	33
																															1	1	1	557	1.89176443673205	0.00762232393026352				2	2	20	Startle	120	0.1497	2	33
																															1	1	1	558	1.89144186489284	0.00665460841264576				2	2	29	PrePulse	78	0	2	36
																															1	1	1	559	1.89499015512411	0.00665460841264576				2	2	29	Startle	120	0.0881	2	36
																															1	1	1	560	1.88982900569681	0.00665460841264576				2	2	30	PrePulse	78	0	2	38
																															1	1	1	561	1.89273215224966	0.00697718025185168				2	2	30	Startle	120	0.1790	2	38
																															1	1	1	562	1.89047414937522	0.00697718025185168				2	2	33	PrePulse	78	0	2	39
																															1	1	1	563	1.89531272696331	0.00633203657343984				2	2	33	Startle	120	0.1748	2	39
																															1	1	1	564	1.8891838620184	0.0072997520910576				2	2	44	PrePulse	78	0	2	32
																															1	1	1	565	1.89015157753602	0.00697718025185168				2	2	44	Startle	120	0.1077	2	32
																															1	1	1	566	1.88660328730475	0.00600946473423392				2	2	55	PrePulse	78	0	2	37
																															1	1	1	567	1.88886129017919	0.00665460841264576				2	2	55	Startle	120	0.1729	2	37
																															1	1	1	568	1.88757100282237	0.00665460841264576
																															1	1	1	569	1.88821614650078	0.00665460841264576				ASRc
																															1	1	1	570	1.88724843098316	0.00665460841264576				Chamber	Block ID	Trial ID	Period	Decibel	PeakVal	BlockId0	TrialId0
																															1	1	1	571	1.88789357466158	0.00697718025185168				2	2	4	Startle	120	0.6103	2	17
																															1	1	1	572	1.89595787064172	0.00697718025185168				2	2	9	Startle	120	0.1829	2	14
																															1	1	1	573	1.88757100282237	0.00665460841264576				2	2	12	Startle	120	0.2190	2	11
																															1	1	1	574	1.88982900569681	0.0072997520910576				2	2	18	Startle	120	0.3690	2	13
																															1	1	1	575	1.88821614650078	0.00697718025185168				2	2	25	Startle	120	0.2545	2	18
																															1	1	1	576	1.89176443673205	0.00697718025185168				2	2	43	Startle	120	0.2174	2	19
																															1	1	1	577	1.88789357466158	0.00697718025185168				2	2	46	Startle	120	0.3542	2	15
																															1	1	1	578	1.8895064338576	0.00697718025185168				2	2	50	Startle	120	0.3155	2	12
																															1	1	1	579	1.88724843098316	0.00633203657343984				2	2	51	Startle	120	0.2484	2	20
																															1	1	1	580	1.89015157753602	0.00697718025185168				2	2	53	Startle	120	0.2971	2	16
																															1	1	1	581	1.88886129017919	0.00665460841264576
																															1	1	1	582	1.89273215224966	0.00697718025185168				PPI Pct
																															1	1	1	583	1.89079672121443	0.0072997520910576				Chamber	Type	Details	Result
																															1	1	1	584	1.89337729592808	0.00697718025185168				2	ASRp	((0.2068 +0.0868 +0.2194 +0.2868 +0.1497 +0.0881 +0.1790 +0.1748 +0.1077 +0.1729)/10)*100	16.7200
																															1	1	1	585	1.89499015512411	0.0072997520910576				2	ASRc	((0.6103 +0.1829 +0.2190 +0.3690 +0.2545 +0.2174 +0.3542 +0.3155 +0.2484 +0.2971)/10)*100	30.6830
																															1	1	1	586	1.89111929305363	0.00665460841264576				2	PPI Pct	(ASRc - ASRp)/ASRc	45.5073
																															1	1	1	587	1.89595787064172	0.00665460841264576
																															1	1	1	588	1.89047414937522	0.00762232393026352				ASRp
																															1	1	1	589	1.89240958041046	0.0072997520910576				Chamber	Block ID	Trial ID	Period	Decibel	PeakVal	BlockId0	TrialId0
																															1	1	1	590	1.89047414937522	0.00697718025185168				2	2	13	PrePulse	86	0	2	43
																															1	1	1	591	1.89499015512411	0.00762232393026352				2	2	13	Startle	120	0.0207	2	43
																															1	1	1	592	1.89079672121443	0.00665460841264576				2	2	17	PrePulse	86	0	2	41
																															1	1	1	593	1.89144186489284	0.00633203657343984				2	2	17	Startle	120	0.0616	2	41
																															1	1	1	594	1.89015157753602	0.00697718025185168				2	2	21	PrePulse	86	0	2	49
																															1	1	1	595	1.89208700857125	0.00762232393026352				2	2	21	Startle	120	0.0387	2	49
																															1	1	1	596	1.89015157753602	0.00794489576946944				2	2	23	PrePulse	86	0	2	44
																															1	1	1	597	1.8895064338576	0.00665460841264576				2	2	23	Startle	120	0.0365	2	44
																															1	1	1	598	1.88757100282237	0.0072997520910576				2	2	31	PrePulse	86	0	2	42
																															1	1	1	599	1.8891838620184	0.00697718025185168				2	2	31	Startle	120	0.0548	2	42
																															1	1	1	600	1.89563529880252	0.0072997520910576				2	2	32	PrePulse	86	0	2	47
																															1	1	1	601	1.88886129017919	0.00697718025185168				2	2	32	Startle	120	0.0581	2	47
																															1	1	1	602	1.89079672121443	0.00633203657343984				2	2	47	PrePulse	86	0	2	46
																															1	1	1	603	1.88982900569681	0.00665460841264576				2	2	47	Startle	120	0.0471	2	46
																															1	1	1	604	1.8946675832849	0.00697718025185168				2	2	48	PrePulse	86	0	2	48
																															1	1	1	605	1.89111929305363	0.00697718025185168				2	2	48	Startle	120	0.0671	2	48
																															1	1	1	606	1.89337729592808	0.00697718025185168				2	2	56	PrePulse	86	0	2	45
																															1	1	1	607	1.89111929305363	0.0072997520910576				2	2	56	Startle	120	0.0323	2	45
																															1	1	1	608	1.89563529880252	0.0072997520910576				2	2	57	PrePulse	86	0	2	50
																															1	1	1	609	1.89240958041046	0.00665460841264576				2	2	57	Startle	120	0.0436	2	50
																															1	1	1	610	1.89240958041046	0.00697718025185168
																															1	1	1	611	1.8895064338576	0.00697718025185168				ASRc
																															1	1	1	612	1.88821614650078	0.00633203657343984				Chamber	Block ID	Trial ID	Period	Decibel	PeakVal	BlockId0	TrialId0
																															1	1	1	613	1.8895064338576	0.00697718025185168				2	2	4	Startle	120	0.6103	2	17
																															1	1	1	614	1.88434528443031	0.00762232393026352				2	2	9	Startle	120	0.1829	2	14
																															1	1	1	615	1.88757100282237	0.00633203657343984				2	2	12	Startle	120	0.2190	2	11
																															1	1	1	616	1.8837001407519	0.00697718025185168				2	2	18	Startle	120	0.3690	2	13
																															1	1	1	617	1.88757100282237	0.00665460841264576				2	2	25	Startle	120	0.2545	2	18
																															1	1	1	618	1.88466785626952	0.00665460841264576				2	2	43	Startle	120	0.2174	2	19
																															1	1	1	619	1.88692585914396	0.0072997520910576				2	2	46	Startle	120	0.3542	2	15
																															1	1	1	620	1.88595814362634	0.0072997520910576				2	2	50	Startle	120	0.3155	2	12
																															1	1	1	621	1.8891838620184	0.00697718025185168				2	2	51	Startle	120	0.2484	2	20
																															1	1	1	622	1.88982900569681	0.00665460841264576				2	2	53	Startle	120	0.2971	2	16
																															1	1	1	623	1.89240958041046	0.00697718025185168
																															1	1	1	624	1.89176443673205	0.00697718025185168				PPI Pct
																															1	1	1	625	1.8946675832849	0.0072997520910576				Chamber	Type	Details	Result
																															1	1	1	626	1.89434501144569	0.00697718025185168				2	ASRp	((0.0207 +0.0616 +0.0387 +0.0365 +0.0548 +0.0581 +0.0471 +0.0671 +0.0323 +0.0436)/10)*100	4.6050
																															1	1	1	627	1.89563529880252	0.00697718025185168				2	ASRc	((0.6103 +0.1829 +0.2190 +0.3690 +0.2545 +0.2174 +0.3542 +0.3155 +0.2484 +0.2971)/10)*100	30.6830
																															1	1	1	628	1.90240930742584	0.00697718025185168				2	PPI Pct	(ASRc - ASRp)/ASRc	84.9917
																															1	1	1	629	1.89660301432014	0.00826746760867536
																															1	1	1	630	1.89886101719458	0.00665460841264576				ASRp
																															1	1	1	631	1.89660301432014	0.00697718025185168				Chamber	Block ID	Trial ID	Period	Decibel	AvgVal	BlockId0	TrialId0
																															1	1	1	632	1.9001513045514	0.005686892895028				2	2	1	PrePulse	74	0	2	30
																															1	1	1	633	1.8946675832849	0.00665460841264576				2	2	1	Startle	120	0.0041	2	30
																															1	1	1	634	1.8946675832849	0.00665460841264576				2	2	2	PrePulse	74	0	2	25
																															1	1	1	635	1.88886129017919	0.00697718025185168				2	2	2	Startle	120	0.0017	2	25
																															1	1	1	636	1.89015157753602	0.00665460841264576				2	2	3	PrePulse	74	0	2	28
																															1	1	1	637	1.88563557178713	0.00665460841264576				2	2	3	Startle	120	0.0056	2	28
																															1	1	1	638	1.88434528443031	0.00633203657343984				2	2	7	PrePulse	74	0	2	22
																															1	1	1	639	1.88337756891269	0.00762232393026352				2	2	7	Startle	120	0.0062	2	22
																															1	1	1	640	1.88434528443031	0.0072997520910576				2	2	11	PrePulse	74	0	2	27
																															1	1	1	641	1.88886129017919	0.00697718025185168				2	2	11	Startle	120	0.0001	2	27
																															1	1	1	642	1.88434528443031	0.00665460841264576				2	2	24	PrePulse	74	0	2	24
																															1	1	1	643	1.88853871833999	0.005686892895028				2	2	24	Startle	120	-0.0007	2	24
																															1	1	1	644	1.88724843098316	0.0072997520910576				2	2	26	PrePulse	74	0	2	29
																															1	1	1	645	1.89047414937522	0.00697718025185168				2	2	26	Startle	120	0.0020	2	29
																															1	1	1	646	1.88886129017919	0.0072997520910576				2	2	28	PrePulse	74	0	2	26
																															1	1	1	647	1.89208700857125	0.00665460841264576				2	2	28	Startle	120	-0.0013	2	26
																															1	1	1	648	1.88982900569681	0.00697718025185168				2	2	40	PrePulse	74	0	2	23
																															1	1	1	649	1.89144186489284	0.00665460841264576				2	2	40	Startle	120	-0.0059	2	23
																															1	1	1	650	1.8895064338576	0.00697718025185168				2	2	59	PrePulse	74	0	2	21
																															1	1	1	651	1.89208700857125	0.00633203657343984				2	2	59	Startle	120	0.0052	2	21
																															1	1	1	652	1.89079672121443	0.00697718025185168
																															1	1	1	653	1.89111929305363	0.00665460841264576				ASRc
																															1	1	1	654	1.89079672121443	0.00762232393026352				Chamber	Block ID	Trial ID	Period	Decibel	AvgVal	BlockId0	TrialId0
																															1	1	1	655	1.89079672121443	0.0072997520910576				2	2	4	Startle	120	-0.0040	2	17
																															1	1	1	656	1.89595787064172	0.00697718025185168				2	2	9	Startle	120	-0.0024	2	14
																															1	1	1	657	1.89047414937522	0.0072997520910576				2	2	12	Startle	120	-0.0008	2	11
																															1	1	1	658	1.89111929305363	0.00633203657343984				2	2	18	Startle	120	0.0016	2	13
																															1	1	1	659	1.88724843098316	0.00633203657343984				2	2	25	Startle	120	-0.0025	2	18
																															1	1	1	660	1.89305472408887	0.00697718025185168				2	2	43	Startle	120	0.0055	2	19
																															1	1	1	661	1.88853871833999	0.00697718025185168				2	2	46	Startle	120	0.0004	2	15
																															1	1	1	662	1.89079672121443	0.00697718025185168				2	2	50	Startle	120	-0.0028	2	12
																															1	1	1	663	1.89015157753602	0.00665460841264576				2	2	51	Startle	120	0.0007	2	20
																															1	1	1	664	1.89111929305363	0.0072997520910576				2	2	53	Startle	120	0.0057	2	16
																															1	1	1	665	1.89079672121443	0.00697718025185168
																															1	1	1	666	1.89176443673205	0.00633203657343984				PPI Pct
																															1	1	1	667	1.89273215224966	0.00697718025185168				Chamber	Type	Details	Result
																															1	1	1	668	1.89337729592808	0.00665460841264576				2	ASRp	((0.0041 +0.0017 +0.0056 +0.0062 +0.0001 +-0.0007 +0.0020 +-0.0013 +-0.0059 +0.0052)/10)*100	0.1700
																															1	1	1	669	1.89918358903378	0.0072997520910576				2	ASRc	((-0.0040 +-0.0024 +-0.0008 +0.0016 +-0.0025 +0.0055 +0.0004 +-0.0028 +0.0007 +0.0057)/10)*100	0.0140
																															1	1	1	670	1.89144186489284	0.00633203657343984				2	PPI Pct	(ASRc - ASRp)/ASRc	-1114.2857
																															1	1	1	671	1.89273215224966	0.00697718025185168
																															1	1	1	672	1.89047414937522	0.00697718025185168				ASRp
																															1	1	1	673	1.8946675832849	0.00665460841264576				Chamber	Block ID	Trial ID	Period	Decibel	AvgVal	BlockId0	TrialId0
																															1	1	1	674	1.88982900569681	0.00697718025185168				2	2	5	PrePulse	78	0	2	34
																															1	1	1	675	1.89240958041046	0.005686892895028				2	2	5	Startle	120	-0.0006	2	34
																															1	1	1	676	1.89047414937522	0.00600946473423392				2	2	6	PrePulse	78	0	2	35
																															1	1	1	677	1.89208700857125	0.00697718025185168				2	2	6	Startle	120	0.0014	2	35
																															1	1	1	678	1.88982900569681	0.0072997520910576				2	2	16	PrePulse	78	0	2	31
																															1	1	1	679	1.89176443673205	0.00794489576946944				2	2	16	Startle	120	0.0018	2	31
																															1	1	1	680	1.8891838620184	0.005686892895028				2	2	19	PrePulse	78	0	2	40
																															1	1	1	681	1.88886129017919	0.00665460841264576				2	2	19	Startle	120	0.0018	2	40
																															1	1	1	682	1.88821614650078	0.00762232393026352				2	2	20	PrePulse	78	0	2	33
																															1	1	1	683	1.88821614650078	0.00762232393026352				2	2	20	Startle	120	0.0014	2	33
																															1	1	1	684	1.89240958041046	0.00697718025185168				2	2	29	PrePulse	78	0	2	36
																															1	1	1	685	1.88789357466158	0.00665460841264576				2	2	29	Startle	120	-0.0020	2	36
																															1	1	1	686	1.89111929305363	0.00665460841264576				2	2	30	PrePulse	78	0	2	38
																															1	1	1	687	1.8891838620184	0.00633203657343984				2	2	30	Startle	120	-0.0003	2	38
																															1	1	1	688	1.89369986776728	0.00665460841264576				2	2	33	PrePulse	78	0	2	39
																															1	1	1	689	1.8895064338576	0.00762232393026352				2	2	33	Startle	120	0.0078	2	39
																															1	1	1	690	1.88982900569681	0.00697718025185168				2	2	44	PrePulse	78	0	2	32
																															1	1	1	691	1.88789357466158	0.00665460841264576				2	2	44	Startle	120	0.0025	2	32
																															1	1	1	692	1.88886129017919	0.00665460841264576				2	2	55	PrePulse	78	0	2	37
																															1	1	1	693	1.88692585914396	0.00697718025185168				2	2	55	Startle	120	0.0002	2	37
																															1	1	1	694	1.88821614650078	0.0072997520910576
																															1	1	1	695	1.88692585914396	0.00600946473423392				ASRc
																															1	1	1	696	1.88821614650078	0.0072997520910576				Chamber	Block ID	Trial ID	Period	Decibel	AvgVal	BlockId0	TrialId0
																															1	1	1	697	1.89563529880252	0.0072997520910576				2	2	4	Startle	120	-0.0040	2	17
																															1	1	1	698	1.88982900569681	0.00665460841264576				2	2	9	Startle	120	-0.0024	2	14
																															1	1	1	699	1.89208700857125	0.00665460841264576				2	2	12	Startle	120	-0.0008	2	11
																															1	1	1	700	1.89176443673205	0.0072997520910576				2	2	18	Startle	120	0.0016	2	13
																															1	1	1	701	1.89886101719458	0.00665460841264576				2	2	25	Startle	120	-0.0025	2	18
																															1	1	1	702	1.89434501144569	0.00697718025185168				2	2	43	Startle	120	0.0055	2	19
																															1	1	1	703	1.89628044248093	0.00762232393026352				2	2	46	Startle	120	0.0004	2	15
																															1	1	1	704	1.89208700857125	0.00697718025185168				2	2	50	Startle	120	-0.0028	2	12
																															1	1	1	705	1.89337729592808	0.00665460841264576				2	2	51	Startle	120	0.0007	2	20
																															1	1	1	706	1.89079672121443	0.00633203657343984				2	2	53	Startle	120	0.0057	2	16
																															1	1	1	707	1.89240958041046	0.00697718025185168
																															1	1	1	708	1.88982900569681	0.00697718025185168				PPI Pct
																															1	1	1	709	1.8895064338576	0.00697718025185168				Chamber	Type	Details	Result
																															1	1	1	710	1.8895064338576	0.00665460841264576				2	ASRp	((-0.0006 +0.0014 +0.0018 +0.0018 +0.0014 +-0.0020 +-0.0003 +0.0078 +0.0025 +0.0002)/10)*100	0.1400
																															1	1	1	711	1.88757100282237	0.00633203657343984				2	ASRc	((-0.0040 +-0.0024 +-0.0008 +0.0016 +-0.0025 +0.0055 +0.0004 +-0.0028 +0.0007 +0.0057)/10)*100	0.0140
																															1	1	1	712	1.89111929305363	0.00697718025185168				2	PPI Pct	(ASRc - ASRp)/ASRc	-900
																															1	1	1	713	1.88789357466158	0.0072997520910576
																															1	1	1	714	1.88982900569681	0.00633203657343984				ASRp
																															1	1	1	715	1.88757100282237	0.0072997520910576				Chamber	Block ID	Trial ID	Period	Decibel	AvgVal	BlockId0	TrialId0
																															1	1	1	716	1.89144186489284	0.0072997520910576				2	2	13	PrePulse	86	0	2	43
																															1	1	1	717	1.88886129017919	0.00665460841264576				2	2	13	Startle	120	-0.0046	2	43
																															1	1	1	718	1.89015157753602	0.0072997520910576				2	2	17	PrePulse	86	0	2	41
																															1	1	1	719	1.88982900569681	0.00762232393026352				2	2	17	Startle	120	0.0025	2	41
																															1	1	1	720	1.89305472408887	0.00697718025185168				2	2	21	PrePulse	86	0	2	49
																															1	1	1	721	1.89144186489284	0.0072997520910576				2	2	21	Startle	120	0.0016	2	49
																															1	1	1	722	1.89369986776728	0.00697718025185168				2	2	23	PrePulse	86	0	2	44
																															1	1	1	723	1.89273215224966	0.00665460841264576				2	2	23	Startle	120	0.0030	2	44
																															1	1	1	724	1.89434501144569	0.0072997520910576				2	2	31	PrePulse	86	0	2	42
																															1	1	1	725	1.90111902006902	0.00600946473423392				2	2	31	Startle	120	0.0016	2	42
																															1	1	1	726	1.89208700857125	0.00665460841264576				2	2	32	PrePulse	86	0	2	47
																															1	1	1	727	1.89337729592808	0.00762232393026352				2	2	32	Startle	120	0.0004	2	47
																															1	1	1	728	1.8895064338576	0.005686892895028				2	2	47	PrePulse	86	0	2	46
																															1	1	1	729	1.89240958041046	0.00697718025185168				2	2	47	Startle	120	0.0042	2	46
																															1	1	1	730	1.88789357466158	0.00697718025185168				2	2	48	PrePulse	86	0	2	48
																															1	1	1	731	1.8895064338576	0.00665460841264576				2	2	48	Startle	120	0.0002	2	48
																															1	1	1	732	1.88660328730475	0.00697718025185168				2	2	56	PrePulse	86	0	2	45
																															1	1	1	733	1.8895064338576	0.00697718025185168				2	2	56	Startle	120	0.0030	2	45
																															1	1	1	734	1.88692585914396	0.00665460841264576				2	2	57	PrePulse	86	0	2	50
																															1	1	1	735	1.88821614650078	0.00697718025185168				2	2	57	Startle	120	0.0000	2	50
																															1	1	1	736	1.88821614650078	0.00697718025185168
																															1	1	1	737	1.88982900569681	0.0072997520910576				ASRc
																															1	1	1	738	1.89273215224966	0.00665460841264576				Chamber	Block ID	Trial ID	Period	Decibel	AvgVal	BlockId0	TrialId0
																															1	1	1	739	1.88789357466158	0.0072997520910576				2	2	4	Startle	120	-0.0040	2	17
																															1	1	1	740	1.89111929305363	0.00665460841264576				2	2	9	Startle	120	-0.0024	2	14
																															1	1	1	741	1.8895064338576	0.00697718025185168				2	2	12	Startle	120	-0.0008	2	11
																															1	1	1	742	1.89176443673205	0.00665460841264576				2	2	18	Startle	120	0.0016	2	13
																															1	1	1	743	1.89047414937522	0.00697718025185168				2	2	25	Startle	120	-0.0025	2	18
																															1	1	1	744	1.89337729592808	0.00697718025185168				2	2	43	Startle	120	0.0055	2	19
																															1	1	1	745	1.89047414937522	0.00665460841264576				2	2	46	Startle	120	0.0004	2	15
																															1	1	1	746	1.89240958041046	0.00697718025185168				2	2	50	Startle	120	-0.0028	2	12
																															1	1	1	747	1.89111929305363	0.00665460841264576				2	2	51	Startle	120	0.0007	2	20
																															1	1	1	748	1.89305472408887	0.00665460841264576				2	2	53	Startle	120	0.0057	2	16
																															1	1	1	749	1.89015157753602	0.00762232393026352
																															1	1	1	750	1.8895064338576	0.00697718025185168				PPI Pct
																															1	1	1	751	1.88466785626952	0.00665460841264576				Chamber	Type	Details	Result
																															1	1	1	752	1.88337756891269	0.00665460841264576				2	ASRp	((-0.0046 +0.0025 +0.0016 +0.0030 +0.0016 +0.0004 +0.0042 +0.0002 +0.0030 +0.0000)/10)*100	0.1190
																															1	1	1	753	1.88853871833999	0.00665460841264576				2	ASRc	((-0.0040 +-0.0024 +-0.0008 +0.0016 +-0.0025 +0.0055 +0.0004 +-0.0028 +0.0007 +0.0057)/10)*100	0.0140
																															1	1	1	754	1.88079699419904	0.00633203657343984				2	PPI Pct	(ASRc - ASRp)/ASRc	-750.0
																															1	1	1	755	1.88273242523428	0.00665460841264576
																															1	1	1	756	1.88208728155587	0.0072997520910576				ASRp
																															1	1	1	757	1.88692585914396	0.0072997520910576				Chamber	Block ID	Trial ID	Period	Decibel	RmsVal	BlockId0	TrialId0
																															1	1	1	758	1.8840227125911	0.00600946473423392				2	2	1	PrePulse	74	0	2	30
																															1	1	1	759	1.88692585914396	0.00697718025185168				2	2	1	Startle	120	0.0532	2	30
																															1	1	1	760	1.88724843098316	0.0072997520910576				2	2	2	PrePulse	74	0	2	25
																															1	1	1	761	1.89111929305363	0.00697718025185168				2	2	2	Startle	120	0.0694	2	25
																															1	1	1	762	1.89047414937522	0.00697718025185168				2	2	3	PrePulse	74	0	2	28
																															1	1	1	763	1.89305472408887	0.0072997520910576				2	2	3	Startle	120	0.0699	2	28
																															1	1	1	764	1.89273215224966	0.00665460841264576				2	2	7	PrePulse	74	0	2	22
																															1	1	1	765	1.89531272696331	0.0072997520910576				2	2	7	Startle	120	0.0824	2	22
																															1	1	1	766	1.90144159190822	0.0072997520910576				2	2	11	PrePulse	74	0	2	27
																															1	1	1	767	1.89724815799855	0.0072997520910576				2	2	11	Startle	120	0.0228	2	27
																															1	1	1	768	1.90079644822981	0.00697718025185168				2	2	24	PrePulse	74	0	2	24
																															1	1	1	769	1.89853844535537	0.0072997520910576				2	2	24	Startle	120	0.0468	2	24
																															1	1	1	770	1.90208673558664	0.00665460841264576				2	2	26	PrePulse	74	0	2	29
																															1	1	1	771	1.89789330167696	0.00665460841264576				2	2	26	Startle	120	0.0608	2	29
																															1	1	1	772	1.89853844535537	0.00600946473423392				2	2	28	PrePulse	74	0	2	26
																															1	1	1	773	1.89273215224966	0.00665460841264576				2	2	28	Startle	120	0.0234	2	26
																															1	1	1	774	1.89273215224966	0.00633203657343984				2	2	40	PrePulse	74	0	2	23
																															1	1	1	775	1.88853871833999	0.0072997520910576				2	2	40	Startle	120	0.0576	2	23
																															1	1	1	776	1.88886129017919	0.00633203657343984				2	2	59	PrePulse	74	0	2	21
																															1	1	1	777	1.88563557178713	0.00633203657343984				2	2	59	Startle	120	0.0286	2	21
																															1	1	1	778	1.88628071546555	0.00665460841264576
																															1	1	1	779	1.88499042810872	0.00697718025185168				ASRc
																															1	1	1	780	1.88434528443031	0.0072997520910576				Chamber	Block ID	Trial ID	Period	Decibel	RmsVal	BlockId0	TrialId0
																															1	1	1	781	1.89144186489284	0.00697718025185168				2	2	4	Startle	120	0.1799	2	17
																															1	1	1	782	1.88466785626952	0.00697718025185168				2	2	9	Startle	120	0.0642	2	14
																															1	1	1	783	1.8895064338576	0.00600946473423392				2	2	12	Startle	120	0.1016	2	11
																															1	1	1	784	1.88789357466158	0.00633203657343984				2	2	18	Startle	120	0.1134	2	13
																															1	1	1	785	1.89369986776728	0.0072997520910576				2	2	25	Startle	120	0.0779	2	18
																															1	1	1	786	1.89047414937522	0.00697718025185168				2	2	43	Startle	120	0.0872	2	19
																															1	1	1	787	1.89273215224966	0.00665460841264576				2	2	46	Startle	120	0.1101	2	15
																															1	1	1	788	1.89273215224966	0.00665460841264576				2	2	50	Startle	120	0.1027	2	12
																															1	1	1	789	1.89595787064172	0.00665460841264576				2	2	51	Startle	120	0.1058	2	20
																															1	1	1	790	1.89337729592808	0.00665460841264576				2	2	53	Startle	120	0.0922	2	16
																															1	1	1	791	1.89369986776728	0.0072997520910576
																															1	1	1	792	1.89144186489284	0.00697718025185168				PPI Pct
																															1	1	1	793	1.89240958041046	0.00697718025185168				Chamber	Type	Details	Result
																															1	1	1	794	1.89789330167696	0.00697718025185168				2	ASRp	((0.0532 +0.0694 +0.0699 +0.0824 +0.0228 +0.0468 +0.0608 +0.0234 +0.0576 +0.0286)/10)*100	5.1490
																															1	1	1	795	1.89079672121443	0.0072997520910576				2	ASRc	((0.1799 +0.0642 +0.1016 +0.1134 +0.0779 +0.0872 +0.1101 +0.1027 +0.1058 +0.0922)/10)*100	10.3500
																															1	1	1	796	1.89369986776728	0.00665460841264576				2	PPI Pct	(ASRc - ASRp)/ASRc	50.2512
																															1	1	1	797	1.89176443673205	0.00826746760867536
																															1	1	1	798	1.89305472408887	0.00633203657343984				ASRp
																															1	1	1	799	1.88886129017919	0.00697718025185168				Chamber	Block ID	Trial ID	Period	Decibel	RmsVal	BlockId0	TrialId0
																															1	1	1	800	1.88886129017919	0.0072997520910576				2	2	5	PrePulse	78	0	2	34
																															1	1	1	801	1.88692585914396	0.0072997520910576				2	2	5	Startle	120	0.0713	2	34
																															1	1	1	802	1.8891838620184	0.0072997520910576				2	2	6	PrePulse	78	0	2	35
																															1	1	1	803	1.88692585914396	0.00665460841264576				2	2	6	Startle	120	0.0289	2	35
																															1	1	1	804	1.89047414937522	0.00600946473423392				2	2	16	PrePulse	78	0	2	31
																															1	1	1	805	1.8895064338576	0.00697718025185168				2	2	16	Startle	120	0.0820	2	31
																															1	1	1	806	1.89079672121443	0.0072997520910576				2	2	19	PrePulse	78	0	2	40
																															1	1	1	807	1.89079672121443	0.0072997520910576				2	2	19	Startle	120	0.0801	2	40
																															1	1	1	808	1.89111929305363	0.0072997520910576				2	2	20	PrePulse	78	0	2	33
																															1	1	1	809	1.89628044248093	0.00665460841264576				2	2	20	Startle	120	0.0451	2	33
																															1	1	1	810	1.89111929305363	0.0072997520910576				2	2	29	PrePulse	78	0	2	36
																															1	1	1	811	1.89208700857125	0.00665460841264576				2	2	29	Startle	120	0.0309	2	36
																															1	1	1	812	1.8895064338576	0.00697718025185168				2	2	30	PrePulse	78	0	2	38
																															1	1	1	813	1.89337729592808	0.0072997520910576				2	2	30	Startle	120	0.0699	2	38
																															1	1	1	814	1.88886129017919	0.00697718025185168				2	2	33	PrePulse	78	0	2	39
																															1	1	1	815	1.8895064338576	0.0072997520910576				2	2	33	Startle	120	0.0700	2	39
																															1	1	1	816	1.88853871833999	0.0072997520910576				2	2	44	PrePulse	78	0	2	32
																															1	1	1	817	1.89111929305363	0.00697718025185168				2	2	44	Startle	120	0.0385	2	32
																															1	1	1	818	1.8891838620184	0.00697718025185168				2	2	55	PrePulse	78	0	2	37
																															1	1	1	819	1.89144186489284	0.00633203657343984				2	2	55	Startle	120	0.0797	2	37
																															1	1	1	820	1.89079672121443	0.00665460841264576
																															1	1	1	821	1.89111929305363	0.00665460841264576				ASRc
																															1	1	1	822	1.89853844535537	0.00665460841264576				Chamber	Block ID	Trial ID	Period	Decibel	RmsVal	BlockId0	TrialId0
																															1	1	1	823	1.89079672121443	0.00665460841264576				2	2	4	Startle	120	0.1799	2	17
																															1	1	1	824	1.89273215224966	0.005686892895028				2	2	9	Startle	120	0.0642	2	14
																															1	1	1	825	1.89273215224966	0.00697718025185168				2	2	12	Startle	120	0.1016	2	11
																															1	1	1	826	1.89757072983775	0.00697718025185168				2	2	18	Startle	120	0.1134	2	13
																															1	1	1	827	1.89305472408887	0.0072997520910576				2	2	25	Startle	120	0.0779	2	18
																															1	1	1	828	1.8946675832849	0.00665460841264576				2	2	43	Startle	120	0.0872	2	19
																															1	1	1	829	1.89144186489284	0.00697718025185168				2	2	46	Startle	120	0.1101	2	15
																															1	1	1	830	1.89402243960649	0.0072997520910576				2	2	50	Startle	120	0.1027	2	12
																															1	1	1	831	1.89111929305363	0.00697718025185168				2	2	51	Startle	120	0.1058	2	20
																															1	1	1	832	1.89047414937522	0.00697718025185168				2	2	53	Startle	120	0.0922	2	16
																															1	1	1	833	1.88886129017919	0.00665460841264576
																															1	1	1	834	1.88724843098316	0.00665460841264576				PPI Pct
																															1	1	1	835	1.88757100282237	0.00633203657343984				Chamber	Type	Details	Result
																															1	1	1	836	1.8840227125911	0.00762232393026352				2	ASRp	((0.0713 +0.0289 +0.0820 +0.0801 +0.0451 +0.0309 +0.0699 +0.0700 +0.0385 +0.0797)/10)*100	5.9640
																															1	1	1	837	1.88886129017919	0.00665460841264576				2	ASRc	((0.1799 +0.0642 +0.1016 +0.1134 +0.0779 +0.0872 +0.1101 +0.1027 +0.1058 +0.0922)/10)*100	10.3500
																															1	1	1	838	1.88531299994793	0.00697718025185168				2	PPI Pct	(ASRc - ASRp)/ASRc	42.3768
																															1	1	1	839	1.88886129017919	0.0072997520910576
																															1	1	1	840	1.88660328730475	0.00665460841264576				ASRp
																															1	1	1	841	1.89111929305363	0.00633203657343984				Chamber	Block ID	Trial ID	Period	Decibel	RmsVal	BlockId0	TrialId0
																															1	1	1	842	1.89111929305363	0.0072997520910576				2	2	13	PrePulse	86	0	2	43
																															1	1	1	843	1.89337729592808	0.0072997520910576				2	2	13	Startle	120	0.0131	2	43
																															1	1	1	844	1.89273215224966	0.00633203657343984				2	2	17	PrePulse	86	0	2	41
																															1	1	1	845	1.89499015512411	0.00794489576946944				2	2	17	Startle	120	0.0233	2	41
																															1	1	1	846	1.89079672121443	0.00665460841264576				2	2	21	PrePulse	86	0	2	49
																															1	1	1	847	1.89240958041046	0.00665460841264576				2	2	21	Startle	120	0.0158	2	49
																															1	1	1	848	1.88886129017919	0.00859003944788128				2	2	23	PrePulse	86	0	2	44
																															1	1	1	849	1.8895064338576	0.00697718025185168				2	2	23	Startle	120	0.0212	2	44
																															1	1	1	850	1.89595787064172	0.00633203657343984				2	2	31	PrePulse	86	0	2	42
																															1	1	1	851	1.88628071546555	0.00762232393026352				2	2	31	Startle	120	0.0279	2	42
																															1	1	1	852	1.88724843098316	0.005686892895028				2	2	32	PrePulse	86	0	2	47
																															1	1	1	853	1.88563557178713	0.00697718025185168				2	2	32	Startle	120	0.0307	2	47
																															1	1	1	854	1.89015157753602	0.00665460841264576				2	2	47	PrePulse	86	0	2	46
																															1	1	1	855	1.88531299994793	0.00697718025185168				2	2	47	Startle	120	0.0206	2	46
																															1	1	1	856	1.88821614650078	0.0072997520910576				2	2	48	PrePulse	86	0	2	48
																															1	1	1	857	1.88660328730475	0.005686892895028				2	2	48	Startle	120	0.0306	2	48
																															1	1	1	858	1.88982900569681	0.0072997520910576				2	2	56	PrePulse	86	0	2	45
																															1	1	1	859	1.88821614650078	0.00600946473423392				2	2	56	Startle	120	0.0161	2	45
																															1	1	1	860	1.89144186489284	0.00633203657343984				2	2	57	PrePulse	86	0	2	50
																															1	1	1	861	1.89047414937522	0.00762232393026352				2	2	57	Startle	120	0.0180	2	50
																															1	1	1	862	1.89208700857125	0.0072997520910576
																															1	1	1	863	1.89563529880252	0.00633203657343984				ASRc
																															1	1	1	864	1.89273215224966	0.00697718025185168				Chamber	Block ID	Trial ID	Period	Decibel	RmsVal	BlockId0	TrialId0
																															1	1	1	865	1.89757072983775	0.00762232393026352				2	2	4	Startle	120	0.1799	2	17
																															1	1	1	866	1.89499015512411	0.00762232393026352				2	2	9	Startle	120	0.0642	2	14
																															1	1	1	867	1.89757072983775	0.00697718025185168				2	2	12	Startle	120	0.1016	2	11
																															1	1	1	868	1.89531272696331	0.00697718025185168				2	2	18	Startle	120	0.1134	2	13
																															1	1	1	869	1.8946675832849	0.00665460841264576				2	2	25	Startle	120	0.0779	2	18
																															1	1	1	870	1.88821614650078	0.0072997520910576				2	2	43	Startle	120	0.0872	2	19
																															1	1	1	871	1.8891838620184	0.00762232393026352				2	2	46	Startle	120	0.1101	2	15
																															1	1	1	872	1.88595814362634	0.00697718025185168				2	2	50	Startle	120	0.1027	2	12
																															1	1	1	873	1.88789357466158	0.00697718025185168				2	2	51	Startle	120	0.1058	2	20
																															1	1	1	874	1.88499042810872	0.00697718025185168				2	2	53	Startle	120	0.0922	2	16
																															1	1	1	875	1.88628071546555	0.00794489576946944
																															1	1	1	876	1.88628071546555	0.00600946473423392				PPI Pct
																															1	1	1	877	1.88595814362634	0.00697718025185168				Chamber	Type	Details	Result
																															1	1	1	878	1.89369986776728	0.00697718025185168				2	ASRp	((0.0131 +0.0233 +0.0158 +0.0212 +0.0279 +0.0307 +0.0206 +0.0306 +0.0161 +0.0180)/10)*100	2.1730
																															1	1	1	879	1.88789357466158	0.0072997520910576				2	ASRc	((0.1799 +0.0642 +0.1016 +0.1134 +0.0779 +0.0872 +0.1101 +0.1027 +0.1058 +0.0922)/10)*100	10.3500
																															1	1	1	880	1.8891838620184	0.0072997520910576				2	PPI Pct	(ASRc - ASRp)/ASRc	79.0048
																															1	1	1	881	1.88660328730475	0.00665460841264576
																															1	1	1	882	1.89176443673205	0.00697718025185168				ASRp
																															1	1	1	883	1.8895064338576	0.00794489576946944				Chamber	Block ID	Trial ID	Period	Decibel	StdevVal	BlockId0	TrialId0
																															1	1	1	884	1.89144186489284	0.00633203657343984				2	2	1	PrePulse	74	0	2	30
																															1	1	1	885	1.89079672121443	0.00665460841264576				2	2	1	Startle	120	0.0533	2	30
																															1	1	1	886	1.89499015512411	0.00697718025185168				2	2	2	PrePulse	74	0	2	25
																															1	1	1	887	1.89402243960649	0.0072997520910576				2	2	2	Startle	120	0.0697	2	25
																															1	1	1	888	1.89724815799855	0.00665460841264576				2	2	3	PrePulse	74	0	2	28
																															1	1	1	889	1.89499015512411	0.00697718025185168				2	2	3	Startle	120	0.0701	2	28
																															1	1	1	890	1.89595787064172	0.00600946473423392				2	2	7	PrePulse	74	0	2	22
																															1	1	1	891	1.89821587351616	0.00697718025185168				2	2	7	Startle	120	0.0826	2	22
																															1	1	1	892	1.89144186489284	0.00633203657343984				2	2	11	PrePulse	74	0	2	27
																															1	1	1	893	1.88886129017919	0.00762232393026352				2	2	11	Startle	120	0.0230	2	27
																															1	1	1	894	1.88724843098316	0.00762232393026352				2	2	24	PrePulse	74	0	2	24
																															1	1	1	895	1.88886129017919	0.00697718025185168				2	2	24	Startle	120	0.0470	2	24
																															1	1	1	896	1.88531299994793	0.0072997520910576				2	2	26	PrePulse	74	0	2	29
																															1	1	1	897	1.88853871833999	0.0072997520910576				2	2	26	Startle	120	0.0611	2	29
																															1	1	1	898	1.88692585914396	0.00665460841264576				2	2	28	PrePulse	74	0	2	26
																															1	1	1	899	1.8891838620184	0.00762232393026352				2	2	28	Startle	120	0.0235	2	26
																															1	1	1	900	1.88789357466158	0.00697718025185168				2	2	40	PrePulse	74	0	2	23
																															1	1	1	901	1.89208700857125	0.00665460841264576				2	2	40	Startle	120	0.0575	2	23
																															1	1	1	902	1.8895064338576	0.0072997520910576				2	2	59	PrePulse	74	0	2	21
																															1	1	1	903	1.89047414937522	0.00665460841264576				2	2	59	Startle	120	0.0282	2	21
																															1	1	1	904	1.8895064338576	0.00633203657343984
																															1	1	1	905	1.8891838620184	0.00697718025185168				ASRc
																															1	1	1	906	1.89595787064172	0.0072997520910576				Chamber	Block ID	Trial ID	Period	Decibel	StdevVal	BlockId0	TrialId0
																															1	1	1	907	1.88982900569681	0.00665460841264576				2	2	4	Startle	120	0.1807	2	17
																															1	1	1	908	1.89208700857125	0.00697718025185168				2	2	9	Startle	120	0.0645	2	14
																															1	1	1	909	1.89176443673205	0.00697718025185168				2	2	12	Startle	120	0.1021	2	11
																															1	1	1	910	1.89563529880252	0.00697718025185168				2	2	18	Startle	120	0.1140	2	13
																															1	1	1	911	1.89305472408887	0.00665460841264576				2	2	25	Startle	120	0.0783	2	18
																															1	1	1	912	1.89563529880252	0.0072997520910576				2	2	43	Startle	120	0.0874	2	19
																															1	1	1	913	1.89305472408887	0.00697718025185168				2	2	46	Startle	120	0.1106	2	15
																															1	1	1	914	1.89369986776728	0.00633203657343984				2	2	50	Startle	120	0.1031	2	12
																															1	1	1	915	1.89015157753602	0.00697718025185168				2	2	51	Startle	120	0.1063	2	20
																															1	1	1	916	1.88982900569681	0.00536432105582207				2	2	53	Startle	120	0.0924	2	16
																															1	1	1	917	1.88628071546555	0.00665460841264576
																															1	1	1	918	1.88531299994793	0.00794489576946944				PPI Pct
																															1	1	1	919	1.89047414937522	0.00697718025185168				Chamber	Type	Details	Result
																															1	1	1	920	1.88434528443031	0.00697718025185168				2	ASRp	((0.0533 +0.0697 +0.0701 +0.0826 +0.0230 +0.0470 +0.0611 +0.0235 +0.0575 +0.0282)/10)*100	5.1600
																															1	1	1	921	1.88692585914396	0.00697718025185168				2	ASRc	((0.1807 +0.0645 +0.1021 +0.1140 +0.0783 +0.0874 +0.1106 +0.1031 +0.1063 +0.0924)/10)*100	10.3940
																															1	1	1	922	1.88563557178713	0.0072997520910576				2	PPI Pct	(ASRc - ASRp)/ASRc	50.3560
																															1	1	1	923	1.89176443673205	0.00697718025185168
																															1	1	1	924	1.8895064338576	0.00762232393026352				ASRp
																															1	1	1	925	1.89305472408887	0.00762232393026352				Chamber	Block ID	Trial ID	Period	Decibel	StdevVal	BlockId0	TrialId0
																															1	1	1	926	1.89176443673205	0.00697718025185168				2	2	5	PrePulse	78	0	2	34
																															1	1	1	927	1.89337729592808	0.00697718025185168				2	2	5	Startle	120	0.0717	2	34
																															1	1	1	928	1.89144186489284	0.00697718025185168				2	2	6	PrePulse	78	0	2	35
																															1	1	1	929	1.89337729592808	0.00697718025185168				2	2	6	Startle	120	0.0290	2	35
																															1	1	1	930	1.89176443673205	0.00633203657343984				2	2	16	PrePulse	78	0	2	31
																															1	1	1	931	1.89240958041046	0.00697718025185168				2	2	16	Startle	120	0.0824	2	31
																															1	1	1	932	1.89305472408887	0.00697718025185168				2	2	19	PrePulse	78	0	2	40
																															1	1	1	933	1.89305472408887	0.00665460841264576				2	2	19	Startle	120	0.0805	2	40
																															1	1	1	934	1.89886101719458	0.0072997520910576				2	2	20	PrePulse	78	0	2	33
																															1	1	1	935	1.89434501144569	0.00697718025185168				2	2	20	Startle	120	0.0453	2	33
																															1	1	1	936	1.89531272696331	0.00697718025185168				2	2	29	PrePulse	78	0	2	36
																															1	1	1	937	1.8946675832849	0.00665460841264576				2	2	29	Startle	120	0.0310	2	36
																															1	1	1	938	1.89595787064172	0.0072997520910576				2	2	30	PrePulse	78	0	2	38
																															1	1	1	939	1.8891838620184	0.00665460841264576				2	2	30	Startle	120	0.0703	2	38
																															1	1	1	940	1.88757100282237	0.00697718025185168				2	2	33	PrePulse	78	0	2	39
																															1	1	1	941	1.88337756891269	0.00665460841264576				2	2	33	Startle	120	0.0699	2	39
																															1	1	1	942	1.88724843098316	0.00697718025185168				2	2	44	PrePulse	78	0	2	32
																															1	1	1	943	1.88466785626952	0.00665460841264576				2	2	44	Startle	120	0.0386	2	32
																															1	1	1	944	1.88757100282237	0.00697718025185168				2	2	55	PrePulse	78	0	2	37
																															1	1	1	945	1.88724843098316	0.00697718025185168				2	2	55	Startle	120	0.0801	2	37
																															1	1	1	946	1.89047414937522	0.005686892895028
																															1	1	1	947	1.89757072983775	0.00633203657343984				ASRc
																															1	1	1	948	1.89015157753602	0.0072997520910576				Chamber	Block ID	Trial ID	Period	Decibel	StdevVal	BlockId0	TrialId0
																															1	1	1	949	1.89176443673205	0.00697718025185168				2	2	4	Startle	120	0.1807	2	17
																															1	1	1	950	1.88757100282237	0.00697718025185168				2	2	9	Startle	120	0.0645	2	14
																															1	1	1	951	1.89305472408887	0.0072997520910576				2	2	12	Startle	120	0.1021	2	11
																															1	1	1	952	1.88724843098316	0.00665460841264576				2	2	18	Startle	120	0.1140	2	13
																															1	1	1	953	1.8891838620184	0.00697718025185168				2	2	25	Startle	120	0.0783	2	18
																															1	1	1	954	1.88724843098316	0.00633203657343984				2	2	43	Startle	120	0.0874	2	19
																															1	1	1	955	1.89047414937522	0.00697718025185168				2	2	46	Startle	120	0.1106	2	15
																															1	1	1	956	1.89047414937522	0.00665460841264576				2	2	50	Startle	120	0.1031	2	12
																															1	1	1	957	1.89337729592808	0.00665460841264576				2	2	51	Startle	120	0.1063	2	20
																															1	1	1	958	1.89402243960649	0.00697718025185168				2	2	53	Startle	120	0.0924	2	16
																															1	1	1	959	1.89434501144569	0.00762232393026352
																															1	1	1	960	1.8946675832849	0.00633203657343984				PPI Pct
																															1	1	1	961	1.89337729592808	0.00633203657343984				Chamber	Type	Details	Result
																															1	1	1	962	1.89434501144569	0.00633203657343984				2	ASRp	((0.0717 +0.0290 +0.0824 +0.0805 +0.0453 +0.0310 +0.0703 +0.0699 +0.0386 +0.0801)/10)*100	5.9880
																															1	1	1	963	1.89144186489284	0.00665460841264576				2	ASRc	((0.1807 +0.0645 +0.1021 +0.1140 +0.0783 +0.0874 +0.1106 +0.1031 +0.1063 +0.0924)/10)*100	10.3940
																															1	1	1	964	1.89273215224966	0.00697718025185168				2	PPI Pct	(ASRc - ASRp)/ASRc	42.3898
																															1	1	1	965	1.89079672121443	0.00633203657343984
																															1	1	1	966	1.89337729592808	0.00665460841264576				ASRp
																															1	1	1	967	1.89079672121443	0.00665460841264576				Chamber	Block ID	Trial ID	Period	Decibel	StdevVal	BlockId0	TrialId0
																															1	1	1	968	1.89273215224966	0.00633203657343984				2	2	13	PrePulse	86	0	2	43
																															1	1	1	969	1.89111929305363	0.00665460841264576				2	2	13	Startle	120	0.0123	2	43
																															1	1	1	970	1.89402243960649	0.00762232393026352				2	2	17	PrePulse	86	0	2	41
																															1	1	1	971	1.89079672121443	0.0072997520910576				2	2	17	Startle	120	0.0233	2	41
																															1	1	1	972	1.89111929305363	0.0072997520910576				2	2	21	PrePulse	86	0	2	49
																															1	1	1	973	1.8891838620184	0.0072997520910576				2	2	21	Startle	120	0.0158	2	49
																															1	1	1	974	1.88821614650078	0.00697718025185168				2	2	23	PrePulse	86	0	2	44
																															1	1	1	975	1.89499015512411	0.00697718025185168				2	2	23	Startle	120	0.0211	2	44
																															1	1	1	976	1.88628071546555	0.0072997520910576				2	2	31	PrePulse	86	0	2	42
																															1	1	1	977	1.8891838620184	0.00665460841264576				2	2	31	Startle	120	0.0280	2	42
																															1	1	1	978	1.88757100282237	0.00600946473423392				2	2	32	PrePulse	86	0	2	47
																															1	1	1	979	1.89240958041046	0.00762232393026352				2	2	32	Startle	120	0.0309	2	47
																															1	1	1	980	1.8895064338576	0.00697718025185168				2	2	47	PrePulse	86	0	2	46
																															1	1	1	981	1.89111929305363	0.00697718025185168				2	2	47	Startle	120	0.0202	2	46
																															1	1	1	982	1.89047414937522	0.00665460841264576				2	2	48	PrePulse	86	0	2	48
																															1	1	1	983	1.89369986776728	0.00697718025185168				2	2	48	Startle	120	0.0308	2	48
																															1	1	1	984	1.89144186489284	0.00697718025185168				2	2	56	PrePulse	86	0	2	45
																															1	1	1	985	1.89240958041046	0.00697718025185168				2	2	56	Startle	120	0.0159	2	45
																															1	1	1	986	1.89015157753602	0.0072997520910576				2	2	57	PrePulse	86	0	2	50
																															1	1	1	987	1.89047414937522	0.00697718025185168				2	2	57	Startle	120	0.0181	2	50
																															1	1	1	988	1.89337729592808	0.00697718025185168
																															1	1	1	989	1.89079672121443	0.00697718025185168				ASRc
																															1	1	1	990	1.89176443673205	0.00697718025185168				Chamber	Block ID	Trial ID	Period	Decibel	StdevVal	BlockId0	TrialId0
																															1	1	1	991	1.89047414937522	0.00697718025185168				2	2	4	Startle	120	0.1807	2	17
																															1	1	1	992	1.89176443673205	0.00697718025185168				2	2	9	Startle	120	0.0645	2	14
																															1	1	1	993	1.88692585914396	0.00697718025185168				2	2	12	Startle	120	0.1021	2	11
																															1	1	1	994	1.88982900569681	0.00697718025185168				2	2	18	Startle	120	0.1140	2	13
																															1	1	1	995	1.88595814362634	0.00697718025185168				2	2	25	Startle	120	0.0783	2	18
																															1	1	1	996	1.88628071546555	0.00697718025185168				2	2	43	Startle	120	0.0874	2	19
																															1	1	1	997	1.88499042810872	0.00697718025185168				2	2	46	Startle	120	0.1106	2	15
																															1	1	1	998	1.88724843098316	0.005686892895028				2	2	50	Startle	120	0.1031	2	12
																															1	1	1	999	1.88628071546555	0.00600946473423392				2	2	51	Startle	120	0.1063	2	20
																															1	1	1	1000	1.88789357466158	0.00665460841264576				2	2	53	Startle	120	0.0924	2	16
																															1	1	2	1	1.89240958041046	0.00697718025185168
																															1	1	2	2	1.89015157753602	3.25882389128674				PPI Pct
																															1	1	2	3	1.89144186489284	3.25753360392991				Chamber	Type	Details	Result
																															1	1	2	4	1.8895064338576	3.25882389128674				2	ASRp	((0.0123 +0.0233 +0.0158 +0.0211 +0.0280 +0.0309 +0.0202 +0.0308 +0.0159 +0.0181)/10)*100	2.1640
																															1	1	2	5	1.8895064338576	3.25882389128674				2	ASRc	((0.1807 +0.0645 +0.1021 +0.1140 +0.0783 +0.0874 +0.1106 +0.1031 +0.1063 +0.0924)/10)*100	10.3940
																															1	1	2	6	1.88757100282237	3.25817874760833				2	PPI Pct	(ASRc - ASRp)/ASRc	79.1803
																															1	1	2	7	1.88692585914396	3.25721103209071
																															1	1	2	8	1.89273215224966	3.25753360392991
																															1	1	2	9	1.88563557178713	3.25914646312594
																															1	1	2	10	1.88821614650078	3.25721103209071
																															1	1	2	11	1.88660328730475	3.25882389128674
																															1	1	2	12	1.89047414937522	3.25785617576912
																															1	1	2	13	1.88692585914396	3.25785617576912
																															1	1	2	14	1.89015157753602	3.25785617576912
																															1	1	2	15	1.89595787064172	3.25850131944753
																															1	1	2	16	1.91757018386852	3.25817874760833
																															1	1	2	17	1.95305308618117	3.25850131944753
																															1	1	2	18	2.00692258332856	3.25882389128674
																															1	1	2	19	2.06627580174245	3.25753360392991
																															1	1	2	20	2.12853216670919	3.25850131944753
																															1	1	2	21	2.17465993971564	3.25785617576912
																															1	1	2	22	2.19562710926402	3.25817874760833
																															1	1	2	23	2.18788538512308	3.25785617576912
																															1	1	2	24	2.13079016958363	3.25817874760833
																															1	1	2	25	2.04853435058612	3.25785617576912
																															1	1	2	26	1.94563393387944	3.25817874760833
																															1	1	2	27	1.85144295683131	3.25850131944753
																															1	1	2	28	1.769509709673	3.25785617576912
																															1	1	2	29	1.7259625113802	3.25817874760833
																															1	1	2	30	1.71370478149038	3.2568884602515
																															1	1	2	31	1.73015594528988	3.25785617576912
																															1	1	2	32	1.7530585458735	3.25850131944753
																															1	1	2	33	1.77338057174347	3.25753360392991
																															1	1	2	34	1.77531600277871	3.25753360392991
																															1	1	2	35	1.76499370392412	3.25850131944753
																															1	1	2	36	1.747574824607	3.25785617576912
																															1	1	2	37	1.72434965218417	3.25817874760833
																															1	1	2	38	1.72370450850576	3.25850131944753
																															1	1	2	39	1.73725252575241	3.25817874760833
																															1	1	2	40	1.77338057174347	3.25592074473388
																															1	1	2	41	1.81466976716183	3.25850131944753
																															1	1	2	42	1.8617652556859	0.00697718025185168
																															1	1	2	43	1.88886129017919	0.00665460841264576
																															1	1	2	44	1.90240930742584	0.0072997520910576
																															1	1	2	45	1.88982900569681	0.00633203657343984
																															1	1	2	46	1.86337811488193	0.00665460841264576
																															1	1	2	47	1.82241149130277	0.00762232393026352
																															1	1	2	48	1.78305772691965	0.00633203657343984
																															1	1	2	49	1.75144568667747	0.00697718025185168
																															1	1	2	50	1.73757509759162	0.0072997520910576
																															1	1	2	51	1.74983282748144	0.00665460841264576
																															1	1	2	52	1.76305827288888	0.0072997520910576
																															1	1	2	53	1.79950889071915	0.00762232393026352
																															1	1	2	54	1.83918522694148	0.00633203657343984
																															1	1	2	55	1.88660328730475	0.0072997520910576
																															1	1	2	56	1.9220861896174	0.00697718025185168
																															1	1	2	57	1.94885965227149	0.00697718025185168
																															1	1	2	58	1.95950452296529	0.00762232393026352
																															1	1	2	59	1.96047223848291	0.0072997520910576
																															1	1	2	60	1.94627907755785	0.00762232393026352
																															1	1	2	61	1.93015048559755	0.0072997520910576
																															1	1	2	62	1.90982845972758	0.00633203657343984
																															1	1	2	63	1.89821587351616	0.00697718025185168
																															1	1	2	64	1.89660301432014	0.00633203657343984
																															1	1	2	65	1.89628044248093	0.0072997520910576
																															1	1	2	66	1.90918331604917	0.0072997520910576
																															1	1	2	67	1.9166024683509	0.00697718025185168
																															1	1	2	68	1.92337647697423	0.00762232393026352
																															1	1	2	69	1.91724761202931	0.00665460841264576
																															1	1	2	70	1.91047360340599	0.00600946473423392
																															1	1	2	71	1.89499015512411	0.00697718025185168
																															1	1	2	72	1.88853871833999	0.0072997520910576
																															1	1	2	73	1.88466785626952	0.00697718025185168
																															1	1	2	74	1.89434501144569	0.00697718025185168
																															1	1	2	75	1.9111187470844	0.00697718025185168
																															1	1	2	76	1.93144077295437	0.00665460841264576
																															1	1	2	77	1.95144022698514	0.00697718025185168
																															1	1	2	78	1.96273024135735	0.00762232393026352
																															1	1	2	79	1.97531054308638	0.00665460841264576
																															1	1	2	80	1.9598270948045	0.00665460841264576
																															1	1	2	81	1.94692422123626	0.00697718025185168
																															1	1	2	82	1.92692476720549	0.00697718025185168
																															1	1	2	83	1.91273160628043	0.00697718025185168
																															1	1	2	84	1.89144186489284	0.00762232393026352
																															1	1	2	85	1.88240985339507	0.00665460841264576
																															1	1	2	86	1.87595841661096	0.00697718025185168
																															1	1	2	87	1.87950670684222	0.005686892895028
																															1	1	2	88	1.88176470971666	0.00762232393026352
																															1	1	2	89	1.8895064338576	0.00665460841264576
																															1	1	2	90	1.89337729592808	0.00697718025185168
																															1	1	2	91	1.90047387639061	0.005686892895028
																															1	1	2	92	1.90337702294346	0.00697718025185168
																															1	1	2	93	1.89757072983775	0.00697718025185168
																															1	1	2	94	1.89660301432014	0.0072997520910576
																															1	1	2	95	1.88692585914396	0.00794489576946944
																															1	1	2	96	1.88434528443031	0.00697718025185168
																															1	1	2	97	1.87757127580699	0.0072997520910576
																															1	1	2	98	1.88240985339507	0.00697718025185168
																															1	1	2	99	1.88111956603825	0.00665460841264576
																															1	1	2	100	1.88628071546555	0.00633203657343984
																															1	1	2	101	1.88821614650078	0.0072997520910576
																															1	1	2	102	1.89144186489284	0.00697718025185168
																															1	1	2	103	1.88853871833999	0.00665460841264576
																															1	1	2	104	1.88434528443031	0.00697718025185168
																															1	1	2	105	1.87628098845016	0.00600946473423392
																															1	1	2	106	1.87079726718366	0.00697718025185168
																															1	1	2	107	1.87595841661096	0.00665460841264576
																															1	1	2	108	1.86950697982684	0.00697718025185168
																															1	1	2	109	1.87757127580699	0.00697718025185168
																															1	1	2	110	1.8840227125911	0.0072997520910576
																															1	1	2	111	1.89853844535537	0.00697718025185168
																															1	1	2	112	1.90402216662187	0.00665460841264576
																															1	1	2	113	1.90950588788837	0.00665460841264576
																															1	1	2	114	1.90982845972758	0.00665460841264576
																															1	1	2	115	1.90724788501393	0.00762232393026352
																															1	1	2	116	1.89950616087299	0.0072997520910576
																															1	1	2	117	1.89595787064172	0.00665460841264576
																															1	1	2	118	1.88789357466158	0.00665460841264576
																															1	1	2	119	1.8840227125911	0.0072997520910576
																															1	1	2	120	1.88305499707349	0.00665460841264576
																															1	1	2	121	1.88208728155587	0.00633203657343984
																															1	1	2	122	1.89015157753602	0.00697718025185168
																															1	1	2	123	1.88886129017919	0.00697718025185168
																															1	1	2	124	1.89595787064172	0.0072997520910576
																															1	1	2	125	1.89692558615934	0.00697718025185168
																															1	1	2	126	1.90273187926505	0.00697718025185168
																															1	1	2	127	1.89853844535537	0.0072997520910576
																															1	1	2	128	1.89918358903378	0.00665460841264576
																															1	1	2	129	1.89595787064172	0.00697718025185168
																															1	1	2	130	1.89595787064172	0.00794489576946944
																															1	1	2	131	1.89144186489284	0.00697718025185168
																															1	1	2	132	1.89208700857125	0.00633203657343984
																															1	1	2	133	1.89111929305363	0.00762232393026352
																															1	1	2	134	1.89337729592808	0.00697718025185168
																															1	1	2	135	1.89982873271219	0.00633203657343984
																															1	1	2	136	1.89273215224966	0.00697718025185168
																															1	1	2	137	1.89208700857125	0.00697718025185168
																															1	1	2	138	1.88563557178713	0.00697718025185168
																															1	1	2	139	1.88466785626952	0.00697718025185168
																															1	1	2	140	1.87724870396778	0.00633203657343984
																															1	1	2	141	1.87692613212857	0.0072997520910576
																															1	1	2	142	1.87434555741493	0.0072997520910576
																															1	1	2	143	1.87950670684222	0.00665460841264576
																															1	1	2	144	1.88305499707349	0.00665460841264576
																															1	1	2	145	1.89079672121443	0.0072997520910576
																															1	1	2	146	1.89563529880252	0.00697718025185168
																															1	1	2	147	1.90176416374743	0.00697718025185168
																															1	1	2	148	1.90498988213949	0.00600946473423392
																															1	1	2	149	1.90434473846108	0.00665460841264576
																															1	1	2	150	1.90853817237075	0.0072997520910576
																															1	1	2	151	1.89886101719458	0.00665460841264576
																															1	1	2	152	1.89628044248093	0.00697718025185168
																															1	1	2	153	1.89079672121443	0.00697718025185168
																															1	1	2	154	1.89176443673205	0.00697718025185168
																															1	1	2	155	1.88660328730475	0.00633203657343984
																															1	1	2	156	1.8891838620184	0.00665460841264576
																															1	1	2	157	1.8891838620184	0.00697718025185168
																															1	1	2	158	1.89531272696331	0.00633203657343984
																															1	1	2	159	1.89305472408887	0.0072997520910576
																															1	1	2	160	1.89660301432014	0.00697718025185168
																															1	1	2	161	1.89434501144569	0.00697718025185168
																															1	1	2	162	1.89402243960649	0.0072997520910576
																															1	1	2	163	1.89499015512411	0.00697718025185168
																															1	1	2	164	1.88757100282237	0.00665460841264576
																															1	1	2	165	1.8891838620184	0.00697718025185168
																															1	1	2	166	1.88499042810872	0.0072997520910576
																															1	1	2	167	1.88886129017919	0.00633203657343984
																															1	1	2	168	1.88595814362634	0.00633203657343984
																															1	1	2	169	1.88982900569681	0.00697718025185168
																															1	1	2	170	1.88563557178713	0.00665460841264576
																															1	1	2	171	1.88757100282237	0.00665460841264576
																															1	1	2	172	1.88563557178713	0.00697718025185168
																															1	1	2	173	1.88595814362634	0.00697718025185168
																															1	1	2	174	1.88273242523428	0.00665460841264576
																															1	1	2	175	1.88240985339507	0.0072997520910576
																															1	1	2	176	1.88047442235984	0.00665460841264576
																															1	1	2	177	1.88111956603825	0.0072997520910576
																															1	1	2	178	1.89047414937522	0.00697718025185168
																															1	1	2	179	1.88563557178713	0.00665460841264576
																															1	1	2	180	1.8895064338576	0.00697718025185168
																															1	1	2	181	1.89176443673205	0.0072997520910576
																															1	1	2	182	1.89692558615934	0.00762232393026352
																															1	1	2	183	1.89144186489284	0.00665460841264576
																															1	1	2	184	1.89240958041046	0.00697718025185168
																															1	1	2	185	1.88982900569681	0.0072997520910576
																															1	1	2	186	1.89111929305363	0.00665460841264576
																															1	1	2	187	1.88660328730475	0.00697718025185168
																															1	1	2	188	1.8891838620184	0.00633203657343984
																															1	1	2	189	1.88466785626952	0.00665460841264576
																															1	1	2	190	1.88531299994793	0.0072997520910576
																															1	1	2	191	1.88853871833999	0.00762232393026352
																															1	1	2	192	1.88692585914396	0.00665460841264576
																															1	1	2	193	1.89144186489284	0.00633203657343984
																															1	1	2	194	1.88886129017919	0.00697718025185168
																															1	1	2	195	1.89337729592808	0.00697718025185168
																															1	1	2	196	1.89144186489284	0.00633203657343984
																															1	1	2	197	1.89434501144569	0.00826746760867536
																															1	1	2	198	1.89144186489284	0.00697718025185168
																															1	1	2	199	1.89337729592808	0.005686892895028
																															1	1	2	200	1.89176443673205	0.00665460841264576
																															1	1	2	201	1.89434501144569	0.0072997520910576
																															1	1	2	202	1.89305472408887	0.00633203657343984
																															1	1	2	203	1.89434501144569	0.00697718025185168
																															1	1	2	204	1.89337729592808	0.0072997520910576
																															1	1	2	205	1.89531272696331	0.0072997520910576
																															1	1	2	206	1.90176416374743	0.00665460841264576
																															1	1	2	207	1.89273215224966	0.0072997520910576
																															1	1	2	208	1.89111929305363	0.00600946473423392
																															1	1	2	209	1.8895064338576	0.00665460841264576
																															1	1	2	210	1.89305472408887	0.0072997520910576
																															1	1	2	211	1.8895064338576	0.00633203657343984
																															1	1	2	212	1.89111929305363	0.00665460841264576
																															1	1	2	213	1.8895064338576	0.00633203657343984
																															1	1	2	214	1.89273215224966	0.00665460841264576
																															1	1	2	215	1.89176443673205	0.00762232393026352
																															1	1	2	216	1.89531272696331	0.00697718025185168
																															1	1	2	217	1.89369986776728	0.00697718025185168
																															1	1	2	218	1.8946675832849	0.00665460841264576
																															1	1	2	219	1.89337729592808	0.00633203657343984
																															1	1	2	220	1.89111929305363	0.00665460841264576
																															1	1	2	221	1.89337729592808	0.00762232393026352
																															1	1	2	222	1.88692585914396	0.00665460841264576
																															1	1	2	223	1.88692585914396	0.00697718025185168
																															1	1	2	224	1.88434528443031	0.00697718025185168
																															1	1	2	225	1.88853871833999	0.00665460841264576
																															1	1	2	226	1.88499042810872	0.00794489576946944
																															1	1	2	227	1.88660328730475	0.00697718025185168
																															1	1	2	228	1.88434528443031	0.00665460841264576
																															1	1	2	229	1.88821614650078	0.00633203657343984
																															1	1	2	230	1.88563557178713	0.00665460841264576
																															1	1	2	231	1.88531299994793	0.00665460841264576
																															1	1	2	232	1.88305499707349	0.00665460841264576
																															1	1	2	233	1.88499042810872	0.00665460841264576
																															1	1	2	234	1.89144186489284	0.00697718025185168
																															1	1	2	235	1.88466785626952	0.00665460841264576
																															1	1	2	236	1.88724843098316	0.00665460841264576
																															1	1	2	237	1.88692585914396	0.00665460841264576
																															1	1	2	238	1.89208700857125	0.00697718025185168
																															1	1	2	239	1.88724843098316	0.00665460841264576
																															1	1	2	240	1.89176443673205	0.0072997520910576
																															1	1	2	241	1.88886129017919	0.00697718025185168
																															1	1	2	242	1.89079672121443	0.00697718025185168
																															1	1	2	243	1.8891838620184	0.00633203657343984
																															1	1	2	244	1.8895064338576	0.00697718025185168
																															1	1	2	245	1.88853871833999	0.00665460841264576
																															1	1	2	246	1.8895064338576	0.00697718025185168
																															1	1	2	247	1.88886129017919	0.00697718025185168
																															1	1	2	248	1.89111929305363	0.00633203657343984
																															1	1	2	249	1.89757072983775	0.00697718025185168
																															1	1	2	250	1.89337729592808	0.00697718025185168
																															1	1	2	251	1.89595787064172	0.00697718025185168
																															1	1	2	252	1.89724815799855	0.00665460841264576
																															1	1	2	253	1.90111902006902	0.00665460841264576
																															1	1	2	254	1.89724815799855	0.00665460841264576
																															1	1	2	255	1.89886101719458	0.00665460841264576
																															1	1	2	256	1.89531272696331	0.00762232393026352
																															1	1	2	257	1.89757072983775	0.00665460841264576
																															1	1	2	258	1.89144186489284	0.00665460841264576
																															1	1	2	259	1.89176443673205	0.00697718025185168
																															1	1	2	260	1.88982900569681	0.00697718025185168
																															1	1	2	261	1.88982900569681	0.00697718025185168
																															1	1	2	262	1.89176443673205	0.00665460841264576
																															1	1	2	263	1.88628071546555	0.00633203657343984
																															1	1	2	264	1.88757100282237	0.0072997520910576
																															1	1	2	265	1.88563557178713	0.00665460841264576
																															1	1	2	266	1.88789357466158	0.00665460841264576
																															1	1	2	267	1.88692585914396	0.00697718025185168
																															1	1	2	268	1.8891838620184	0.00665460841264576
																															1	1	2	269	1.88628071546555	0.005686892895028
																															1	1	2	270	1.88757100282237	0.00697718025185168
																															1	1	2	271	1.88757100282237	0.00665460841264576
																															1	1	2	272	1.89015157753602	0.0072997520910576
																															1	1	2	273	1.8891838620184	0.00665460841264576
																															1	1	2	274	1.89111929305363	0.00697718025185168
																															1	1	2	275	1.89079672121443	0.00633203657343984
																															1	1	2	276	1.89305472408887	0.00665460841264576
																															1	1	2	277	1.90047387639061	0.00697718025185168
																															1	1	2	278	1.8946675832849	0.00665460841264576
																															1	1	2	279	1.89531272696331	0.00633203657343984
																															1	1	2	280	1.89273215224966	0.00762232393026352
																															1	1	2	281	1.8946675832849	0.00665460841264576
																															1	1	2	282	1.88886129017919	0.00697718025185168
																															1	1	2	283	1.88821614650078	0.00665460841264576
																															1	1	2	284	1.88466785626952	0.00665460841264576
																															1	1	2	285	1.88757100282237	0.00665460841264576
																															1	1	2	286	1.88595814362634	0.00665460841264576
																															1	1	2	287	1.88757100282237	0.0072997520910576
																															1	1	2	288	1.88628071546555	0.00633203657343984
																															1	1	2	289	1.88660328730475	0.00633203657343984
																															1	1	2	290	1.88821614650078	0.00665460841264576
																															1	1	2	291	1.88628071546555	0.0072997520910576
																															1	1	2	292	1.89015157753602	0.00665460841264576
																															1	1	2	293	1.88595814362634	0.00697718025185168
																															1	1	2	294	1.8895064338576	0.00762232393026352
																															1	1	2	295	1.88886129017919	0.00665460841264576
																															1	1	2	296	1.89240958041046	0.00697718025185168
																															1	1	2	297	1.88982900569681	0.00665460841264576
																															1	1	2	298	1.89176443673205	0.00697718025185168
																															1	1	2	299	1.89079672121443	0.00762232393026352
																															1	1	2	300	1.89434501144569	0.00697718025185168
																															1	1	2	301	1.89015157753602	0.0072997520910576
																															1	1	2	302	1.89240958041046	0.00665460841264576
																															1	1	2	303	1.88982900569681	0.00665460841264576
																															1	1	2	304	1.89208700857125	0.00633203657343984
																															1	1	2	305	1.89918358903378	0.00697718025185168
																															1	1	2	306	1.89015157753602	0.00600946473423392
																															1	1	2	307	1.89240958041046	0.0072997520910576
																															1	1	2	308	1.89144186489284	0.00665460841264576
																															1	1	2	309	1.89402243960649	0.00697718025185168
																															1	1	2	310	1.8895064338576	0.00697718025185168
																															1	1	2	311	1.89015157753602	0.00633203657343984
																															1	1	2	312	1.88789357466158	0.0072997520910576
																															1	1	2	313	1.8895064338576	0.00697718025185168
																															1	1	2	314	1.88853871833999	0.00697718025185168
																															1	1	2	315	1.88982900569681	0.0072997520910576
																															1	1	2	316	1.88982900569681	0.00762232393026352
																															1	1	2	317	1.89079672121443	0.00697718025185168
																															1	1	2	318	1.89144186489284	0.00665460841264576
																															1	1	2	319	1.89176443673205	0.00697718025185168
																															1	1	2	320	1.89595787064172	0.00665460841264576
																															1	1	2	321	1.89176443673205	0.0072997520910576
																															1	1	2	322	1.89369986776728	0.00665460841264576
																															1	1	2	323	1.89176443673205	0.00697718025185168
																															1	1	2	324	1.89563529880252	0.00697718025185168
																															1	1	2	325	1.89079672121443	0.005686892895028
																															1	1	2	326	1.89337729592808	0.00697718025185168
																															1	1	2	327	1.89047414937522	0.00600946473423392
																															1	1	2	328	1.89499015512411	0.0072997520910576
																															1	1	2	329	1.89208700857125	0.00697718025185168
																															1	1	2	330	1.89337729592808	0.00794489576946944
																															1	1	2	331	1.89144186489284	0.00697718025185168
																															1	1	2	332	1.89111929305363	0.00697718025185168
																															1	1	2	333	1.89499015512411	0.0072997520910576
																															1	1	2	334	1.88563557178713	0.00697718025185168
																															1	1	2	335	1.88724843098316	0.00665460841264576
																															1	1	2	336	1.8837001407519	0.00665460841264576
																															1	1	2	337	1.88595814362634	0.00762232393026352
																															1	1	2	338	1.88434528443031	0.00697718025185168
																															1	1	2	339	1.88660328730475	0.00633203657343984
																															1	1	2	340	1.88466785626952	0.00665460841264576
																															1	1	2	341	1.88660328730475	0.0072997520910576
																															1	1	2	342	1.88628071546555	0.00665460841264576
																															1	1	2	343	1.88821614650078	0.00665460841264576
																															1	1	2	344	1.88757100282237	0.00697718025185168
																															1	1	2	345	1.88982900569681	0.00633203657343984
																															1	1	2	346	1.88821614650078	0.00697718025185168
																															1	1	2	347	1.88982900569681	0.00697718025185168
																															1	1	2	348	1.89499015512411	0.00697718025185168
																															1	1	2	349	1.88982900569681	0.00697718025185168
																															1	1	2	350	1.89047414937522	0.00665460841264576
																															1	1	2	351	1.8891838620184	0.00665460841264576
																															1	1	2	352	1.8946675832849	0.00665460841264576
																															1	1	2	353	1.89111929305363	0.00697718025185168
																															1	1	2	354	1.89240958041046	0.00697718025185168
																															1	1	2	355	1.89176443673205	0.00633203657343984
																															1	1	2	356	1.89434501144569	0.00665460841264576
																															1	1	2	357	1.89305472408887	0.00697718025185168
																															1	1	2	358	1.8946675832849	0.00697718025185168
																															1	1	2	359	1.89208700857125	0.00600946473423392
																															1	1	2	360	1.89208700857125	0.00697718025185168
																															1	1	2	361	1.89273215224966	0.00665460841264576
																															1	1	2	362	1.88660328730475	0.00665460841264576
																															1	1	2	363	1.88853871833999	0.00762232393026352
																															1	1	2	364	1.88595814362634	0.00665460841264576
																															1	1	2	365	1.88886129017919	0.00697718025185168
																															1	1	2	366	1.88692585914396	0.0072997520910576
																															1	1	2	367	1.8891838620184	0.00697718025185168
																															1	1	2	368	1.88789357466158	0.00633203657343984
																															1	1	2	369	1.88886129017919	0.00697718025185168
																															1	1	2	370	1.88789357466158	0.00697718025185168
																															1	1	2	371	1.89079672121443	0.00665460841264576
																															1	1	2	372	1.8895064338576	0.0072997520910576
																															1	1	2	373	1.89111929305363	0.00697718025185168
																															1	1	2	374	1.89047414937522	0.00762232393026352
																															1	1	2	375	1.89273215224966	0.00697718025185168
																															1	1	2	376	1.90079644822981	0.00697718025185168
																															1	1	2	377	1.89208700857125	0.00697718025185168
																															1	1	2	378	1.89499015512411	0.00600946473423392
																															1	1	2	379	1.89337729592808	0.00697718025185168
																															1	1	2	380	1.89628044248093	0.00665460841264576
																															1	1	2	381	1.89305472408887	0.00697718025185168
																															1	1	2	382	1.89273215224966	0.00762232393026352
																															1	1	2	383	1.89079672121443	0.00697718025185168
																															1	1	2	384	1.89176443673205	0.00697718025185168
																															1	1	2	385	1.8891838620184	0.0072997520910576
																															1	1	2	386	1.8895064338576	0.00762232393026352
																															1	1	2	387	1.88724843098316	0.00665460841264576
																															1	1	2	388	1.88595814362634	0.00697718025185168
																															1	1	2	389	1.88660328730475	0.00665460841264576
																															1	1	2	390	1.88466785626952	0.0072997520910576
																															1	1	2	391	1.88789357466158	0.0072997520910576
																															1	1	2	392	1.88531299994793	0.00633203657343984
																															1	1	2	393	1.88789357466158	0.00665460841264576
																															1	1	2	394	1.88853871833999	0.00633203657343984
																															1	1	2	395	1.89240958041046	0.00762232393026352
																															1	1	2	396	1.8891838620184	0.00697718025185168
																															1	1	2	397	1.89144186489284	0.00665460841264576
																															1	1	2	398	1.89015157753602	0.00762232393026352
																															1	1	2	399	1.89337729592808	0.00697718025185168
																															1	1	2	400	1.89144186489284	0.00697718025185168
																															1	1	2	401	1.89208700857125	0.00697718025185168
																															1	1	2	402	1.89015157753602	0.0072997520910576
																															1	1	2	403	1.89111929305363	0.00665460841264576
																															1	1	2	404	1.89789330167696	0.0072997520910576
																															1	1	2	405	1.8895064338576	0.00697718025185168
																															1	1	2	406	1.89176443673205	0.00697718025185168
																															1	1	2	407	1.89015157753602	0.0072997520910576
																															1	1	2	408	1.89563529880252	0.00697718025185168
																															1	1	2	409	1.89240958041046	0.00665460841264576
																															1	1	2	410	1.89531272696331	0.00697718025185168
																															1	1	2	411	1.89305472408887	0.0072997520910576
																															1	1	2	412	1.89402243960649	0.00633203657343984
																															1	1	2	413	1.89015157753602	0.00665460841264576
																															1	1	2	414	1.89111929305363	0.00600946473423392
																															1	1	2	415	1.88757100282237	0.00633203657343984
																															1	1	2	416	1.8891838620184	0.0072997520910576
																															1	1	2	417	1.88821614650078	0.00697718025185168
																															1	1	2	418	1.88821614650078	0.00697718025185168
																															1	1	2	419	1.89144186489284	0.00665460841264576
																															1	1	2	420	1.88853871833999	0.00665460841264576
																															1	1	2	421	1.89176443673205	0.0072997520910576
																															1	1	2	422	1.89047414937522	0.00665460841264576
																															1	1	2	423	1.89660301432014	0.00665460841264576
																															1	1	2	424	1.89208700857125	0.0072997520910576
																															1	1	2	425	1.89402243960649	0.00697718025185168
																															1	1	2	426	1.89111929305363	0.00633203657343984
																															1	1	2	427	1.89273215224966	0.0072997520910576
																															1	1	2	428	1.89144186489284	0.00697718025185168
																															1	1	2	429	1.89144186489284	0.0072997520910576
																															1	1	2	430	1.89111929305363	0.0072997520910576
																															1	1	2	431	1.89208700857125	0.00762232393026352
																															1	1	2	432	1.89853844535537	0.00794489576946944
																															1	1	2	433	1.89305472408887	0.00762232393026352
																															1	1	2	434	1.89595787064172	0.00697718025185168
																															1	1	2	435	1.89434501144569	0.00633203657343984
																															1	1	2	436	1.89499015512411	0.00794489576946944
																															1	1	2	437	1.89111929305363	0.00697718025185168
																															1	1	2	438	1.8895064338576	0.00697718025185168
																															1	1	2	439	1.88660328730475	0.00665460841264576
																															1	1	2	440	1.88499042810872	0.00697718025185168
																															1	1	2	441	1.8840227125911	0.00697718025185168
																															1	1	2	442	1.88660328730475	0.0072997520910576
																															1	1	2	443	1.88563557178713	0.00697718025185168
																															1	1	2	444	1.88724843098316	0.0072997520910576
																															1	1	2	445	1.88595814362634	0.00633203657343984
																															1	1	2	446	1.88757100282237	0.00600946473423392
																															1	1	2	447	1.89499015512411	0.00633203657343984
																															1	1	2	448	1.88628071546555	0.00665460841264576
																															1	1	2	449	1.88853871833999	0.0072997520910576
																															1	1	2	450	1.88628071546555	0.00697718025185168
																															1	1	2	451	1.89111929305363	0.00633203657343984
																															1	1	2	452	1.88692585914396	0.0072997520910576
																															1	1	2	453	1.8895064338576	0.00665460841264576
																															1	1	2	454	1.8891838620184	0.0072997520910576
																															1	1	2	455	1.89240958041046	0.0072997520910576
																															1	1	2	456	1.89240958041046	0.0072997520910576
																															1	1	2	457	1.89434501144569	0.00762232393026352
																															1	1	2	458	1.89595787064172	0.00633203657343984
																															1	1	2	459	1.89595787064172	0.00665460841264576
																															1	1	2	460	1.89757072983775	0.00697718025185168
																															1	1	2	461	1.89434501144569	0.0072997520910576
																															1	1	2	462	1.89595787064172	0.00762232393026352
																															1	1	2	463	1.89079672121443	0.00697718025185168
																															1	1	2	464	1.89047414937522	0.00633203657343984
																															1	1	2	465	1.88853871833999	0.00697718025185168
																															1	1	2	466	1.88982900569681	0.00665460841264576
																															1	1	2	467	1.88660328730475	0.00665460841264576
																															1	1	2	468	1.88692585914396	0.00697718025185168
																															1	1	2	469	1.88466785626952	0.0072997520910576
																															1	1	2	470	1.88660328730475	0.00633203657343984
																															1	1	2	471	1.8837001407519	0.00697718025185168
																															1	1	2	472	1.88434528443031	0.00665460841264576
																															1	1	2	473	1.8840227125911	0.00633203657343984
																															1	1	2	474	1.88466785626952	0.00600946473423392
																															1	1	2	475	1.89273215224966	0.00697718025185168
																															1	1	2	476	1.88466785626952	0.00633203657343984
																															1	1	2	477	1.8891838620184	0.00762232393026352
																															1	1	2	478	1.88789357466158	0.0072997520910576
																															1	1	2	479	1.89273215224966	0.00762232393026352
																															1	1	2	480	1.89015157753602	0.00697718025185168
																															1	1	2	481	1.89305472408887	0.0072997520910576
																															1	1	2	482	1.89305472408887	0.00665460841264576
																															1	1	2	483	1.8946675832849	0.00633203657343984
																															1	1	2	484	1.89402243960649	0.00665460841264576
																															1	1	2	485	1.89692558615934	0.00665460841264576
																															1	1	2	486	1.8946675832849	0.00665460841264576
																															1	1	2	487	1.89369986776728	0.00697718025185168
																															1	1	2	488	1.89079672121443	0.00697718025185168
																															1	1	2	489	1.8891838620184	0.00600946473423392
																															1	1	2	490	1.89111929305363	0.00697718025185168
																															1	1	2	491	1.88595814362634	0.00665460841264576
																															1	1	2	492	1.88757100282237	0.00762232393026352
																															1	1	2	493	1.88531299994793	0.0072997520910576
																															1	1	2	494	1.89015157753602	0.00697718025185168
																															1	1	2	495	1.88692585914396	0.00697718025185168
																															1	1	2	496	1.8895064338576	0.00665460841264576
																															1	1	2	497	1.89047414937522	0.0072997520910576
																															1	1	2	498	1.89402243960649	0.00665460841264576
																															1	1	2	499	1.89208700857125	0.00665460841264576
																															1	1	2	500	1.89434501144569	0.00762232393026352
																															1	1	2	501	1.89273215224966	0.0072997520910576
																															1	1	2	502	1.89240958041046	0.00633203657343984
																															1	1	2	503	1.89821587351616	0.00697718025185168
																															1	1	2	504	1.8895064338576	0.00697718025185168
																															1	1	2	505	1.89079672121443	0.00697718025185168
																															1	1	2	506	1.88886129017919	0.00697718025185168
																															1	1	2	507	1.89402243960649	0.00665460841264576
																															1	1	2	508	1.88982900569681	0.0072997520910576
																															1	1	2	509	1.89208700857125	0.00633203657343984
																															1	1	2	510	1.88886129017919	0.00762232393026352
																															1	1	2	511	1.89047414937522	0.00665460841264576
																															1	1	2	512	1.88692585914396	0.005686892895028
																															1	1	2	513	1.88821614650078	0.0072997520910576
																															1	1	2	514	1.88499042810872	0.00665460841264576
																															1	1	2	515	1.88563557178713	0.0072997520910576
																															1	1	2	516	1.88531299994793	0.00600946473423392
																															1	1	2	517	1.88563557178713	0.00665460841264576
																															1	1	2	518	1.89240958041046	0.00697718025185168
																															1	1	2	519	1.88628071546555	0.00633203657343984
																															1	1	2	520	1.88886129017919	0.00697718025185168
																															1	1	2	521	1.88724843098316	0.00665460841264576
																															1	1	2	522	1.89144186489284	0.00697718025185168
																															1	1	2	523	1.88757100282237	0.00697718025185168
																															1	1	2	524	1.88853871833999	0.0072997520910576
																															1	1	2	525	1.88724843098316	0.00665460841264576
																															1	1	2	526	1.8895064338576	0.00697718025185168
																															1	1	2	527	1.88789357466158	0.00697718025185168
																															1	1	2	528	1.8895064338576	0.0072997520910576
																															1	1	2	529	1.89015157753602	0.00665460841264576
																															1	1	2	530	1.88982900569681	0.00633203657343984
																															1	1	2	531	1.8946675832849	0.00633203657343984
																															1	1	2	532	1.88982900569681	0.00665460841264576
																															1	1	2	533	1.89402243960649	0.0072997520910576
																															1	1	2	534	1.89273215224966	0.00697718025185168
																															1	1	2	535	1.89692558615934	0.0072997520910576
																															1	1	2	536	1.89499015512411	0.00697718025185168
																															1	1	2	537	1.89660301432014	0.00697718025185168
																															1	1	2	538	1.89208700857125	0.00633203657343984
																															1	1	2	539	1.89240958041046	0.00665460841264576
																															1	1	2	540	1.89111929305363	0.0072997520910576
																															1	1	2	541	1.89369986776728	0.00665460841264576
																															1	1	2	542	1.89079672121443	0.00697718025185168
																															1	1	2	543	1.89079672121443	0.00762232393026352
																															1	1	2	544	1.89015157753602	0.005686892895028
																															1	1	2	545	1.88886129017919	0.00762232393026352
																															1	1	2	546	1.89595787064172	0.00665460841264576
																															1	1	2	547	1.88724843098316	0.00665460841264576
																															1	1	2	548	1.89047414937522	0.00762232393026352
																															1	1	2	549	1.88853871833999	0.00697718025185168
																															1	1	2	550	1.89144186489284	0.00665460841264576
																															1	1	2	551	1.88757100282237	0.00794489576946944
																															1	1	2	552	1.88821614650078	0.00536432105582207
																															1	1	2	553	1.88724843098316	0.00697718025185168
																															1	1	2	554	1.8895064338576	0.00633203657343984
																															1	1	2	555	1.88821614650078	0.00665460841264576
																															1	1	2	556	1.89079672121443	0.00665460841264576
																															1	1	2	557	1.89047414937522	0.00665460841264576
																															1	1	2	558	1.89337729592808	0.00697718025185168
																															1	1	2	559	1.89757072983775	0.0072997520910576
																															1	1	2	560	1.8946675832849	0.0072997520910576
																															1	1	2	561	1.89563529880252	0.00762232393026352
																															1	1	2	562	1.89240958041046	0.00665460841264576
																															1	1	2	563	1.89111929305363	0.00633203657343984
																															1	1	2	564	1.88821614650078	0.0072997520910576
																															1	1	2	565	1.89111929305363	0.00633203657343984
																															1	1	2	566	1.88563557178713	0.00665460841264576
																															1	1	2	567	1.88789357466158	0.00633203657343984
																															1	1	2	568	1.88563557178713	0.00697718025185168
																															1	1	2	569	1.88886129017919	0.00600946473423392
																															1	1	2	570	1.88789357466158	0.00697718025185168
																															1	1	2	571	1.88757100282237	0.00697718025185168
																															1	1	2	572	1.88821614650078	0.00697718025185168
																															1	1	2	573	1.8895064338576	0.00665460841264576
																															1	1	2	574	1.89853844535537	0.00633203657343984
																															1	1	2	575	1.89079672121443	0.00697718025185168
																															1	1	2	576	1.89369986776728	0.00665460841264576
																															1	1	2	577	1.89369986776728	0.00697718025185168
																															1	1	2	578	1.9001513045514	0.00665460841264576
																															1	1	2	579	1.89757072983775	0.00600946473423392
																															1	1	2	580	1.89982873271219	0.00697718025185168
																															1	1	2	581	1.89789330167696	0.00697718025185168
																															1	1	2	582	1.89982873271219	0.00633203657343984
																															1	1	2	583	1.89724815799855	0.0072997520910576
																															1	1	2	584	1.89853844535537	0.00536432105582207
																															1	1	2	585	1.89434501144569	0.00536432105582207
																															1	1	2	586	1.89240958041046	0.00697718025185168
																															1	1	2	587	1.89144186489284	0.00762232393026352
																															1	1	2	588	1.88499042810872	0.00697718025185168
																															1	1	2	589	1.88628071546555	0.00633203657343984
																															1	1	2	590	1.88111956603825	0.0072997520910576
																															1	1	2	591	1.88337756891269	0.00762232393026352
																															1	1	2	592	1.88047442235984	0.00633203657343984
																															1	1	2	593	1.88337756891269	0.00665460841264576
																															1	1	2	594	1.88079699419904	0.0072997520910576
																															1	1	2	595	1.88434528443031	0.00697718025185168
																															1	1	2	596	1.88499042810872	0.00665460841264576
																															1	1	2	597	1.88886129017919	0.00697718025185168
																															1	1	2	598	1.8891838620184	0.00665460841264576
																															1	1	2	599	1.89015157753602	0.00762232393026352
																															1	1	2	600	1.89144186489284	0.00697718025185168
																															1	1	2	601	1.89176443673205	0.00697718025185168
																															1	1	2	602	1.89853844535537	0.00697718025185168
																															1	1	2	603	1.89176443673205	0.0072997520910576
																															1	1	2	604	1.89369986776728	0.0072997520910576
																															1	1	2	605	1.89208700857125	0.00665460841264576
																															1	1	2	606	1.89499015512411	0.00633203657343984
																															1	1	2	607	1.89079672121443	0.0072997520910576
																															1	1	2	608	1.89208700857125	0.00697718025185168
																															1	1	2	609	1.8895064338576	0.00665460841264576
																															1	1	2	610	1.89079672121443	0.00665460841264576
																															1	1	2	611	1.88724843098316	0.00697718025185168
																															1	1	2	612	1.88982900569681	0.0072997520910576
																															1	1	2	613	1.88628071546555	0.00665460841264576
																															1	1	2	614	1.88595814362634	0.00600946473423392
																															1	1	2	615	1.88628071546555	0.0072997520910576
																															1	1	2	616	1.88595814362634	0.00762232393026352
																															1	1	2	617	1.89208700857125	0.00665460841264576
																															1	1	2	618	1.88692585914396	0.00697718025185168
																															1	1	2	619	1.89047414937522	0.00697718025185168
																															1	1	2	620	1.8895064338576	0.00633203657343984
																															1	1	2	621	1.89240958041046	0.00697718025185168
																															1	1	2	622	1.89079672121443	0.00665460841264576
																															1	1	2	623	1.89176443673205	0.00697718025185168
																															1	1	2	624	1.88982900569681	0.00633203657343984
																															1	1	2	625	1.89144186489284	0.00665460841264576
																															1	1	2	626	1.8895064338576	0.00665460841264576
																															1	1	2	627	1.89015157753602	0.00697718025185168
																															1	1	2	628	1.88821614650078	0.00762232393026352
																															1	1	2	629	1.8891838620184	0.00633203657343984
																															1	1	2	630	1.89434501144569	0.00633203657343984
																															1	1	2	631	1.88789357466158	0.00697718025185168
																															1	1	2	632	1.89047414937522	0.00762232393026352
																															1	1	2	633	1.8891838620184	0.00665460841264576
																															1	1	2	634	1.89273215224966	0.00633203657343984
																															1	1	2	635	1.89047414937522	0.00665460841264576
																															1	1	2	636	1.89273215224966	0.00697718025185168
																															1	1	2	637	1.89079672121443	0.00697718025185168
																															1	1	2	638	1.89047414937522	0.00665460841264576
																															1	1	2	639	1.8895064338576	0.00697718025185168
																															1	1	2	640	1.89111929305363	0.00697718025185168
																															1	1	2	641	1.89015157753602	0.00665460841264576
																															1	1	2	642	1.8895064338576	0.00697718025185168
																															1	1	2	643	1.8895064338576	0.005686892895028
																															1	1	2	644	1.88886129017919	0.00697718025185168
																															1	1	2	645	1.89628044248093	0.00794489576946944
																															1	1	2	646	1.88886129017919	0.005686892895028
																															1	1	2	647	1.89079672121443	0.00697718025185168
																															1	1	2	648	1.88982900569681	0.00665460841264576
																															1	1	2	649	1.89369986776728	0.00665460841264576
																															1	1	2	650	1.89015157753602	0.0072997520910576
																															1	1	2	651	1.89015157753602	0.00665460841264576
																															1	1	2	652	1.88886129017919	0.00697718025185168
																															1	1	2	653	1.89015157753602	0.00697718025185168
																															1	1	2	654	1.88853871833999	0.0072997520910576
																															1	1	2	655	1.88982900569681	0.0072997520910576
																															1	1	2	656	1.88886129017919	0.0072997520910576
																															1	1	2	657	1.89144186489284	0.00665460841264576
																															1	1	2	658	1.8946675832849	0.00633203657343984
																															1	1	2	659	1.89176443673205	0.00665460841264576
																															1	1	2	660	1.89499015512411	0.00697718025185168
																															1	1	2	661	1.89079672121443	0.00665460841264576
																															1	1	2	662	1.89499015512411	0.00665460841264576
																															1	1	2	663	1.89111929305363	0.0072997520910576
																															1	1	2	664	1.89240958041046	0.00697718025185168
																															1	1	2	665	1.88821614650078	0.00600946473423392
																															1	1	2	666	1.88821614650078	0.0072997520910576
																															1	1	2	667	1.88692585914396	0.0072997520910576
																															1	1	2	668	1.8891838620184	0.0072997520910576
																															1	1	2	669	1.88595814362634	0.00600946473423392
																															1	1	2	670	1.88563557178713	0.00600946473423392
																															1	1	2	671	1.88595814362634	0.00600946473423392
																															1	1	2	672	1.88531299994793	0.00665460841264576
																															1	1	2	673	1.89369986776728	0.00697718025185168
																															1	1	2	674	1.88692585914396	0.00762232393026352
																															1	1	2	675	1.8891838620184	0.00665460841264576
																															1	1	2	676	1.88821614650078	0.00697718025185168
																															1	1	2	677	1.89240958041046	0.00697718025185168
																															1	1	2	678	1.8895064338576	0.0072997520910576
																															1	1	2	679	1.89273215224966	0.00697718025185168
																															1	1	2	680	1.89079672121443	0.00697718025185168
																															1	1	2	681	1.89434501144569	0.0072997520910576
																															1	1	2	682	1.89369986776728	0.00697718025185168
																															1	1	2	683	1.89628044248093	0.0072997520910576
																															1	1	2	684	1.89369986776728	0.00665460841264576
																															1	1	2	685	1.89595787064172	0.0072997520910576
																															1	1	2	686	1.89724815799855	0.00665460841264576
																															1	1	2	687	1.89273215224966	0.00665460841264576
																															1	1	2	688	1.89434501144569	0.00697718025185168
																															1	1	2	689	1.8891838620184	0.00665460841264576
																															1	1	2	690	1.89079672121443	0.00536432105582207
																															1	1	2	691	1.88628071546555	0.00697718025185168
																															1	1	2	692	1.88886129017919	0.00633203657343984
																															1	1	2	693	1.88434528443031	0.00697718025185168
																															1	1	2	694	1.88499042810872	0.00697718025185168
																															1	1	2	695	1.8840227125911	0.0072997520910576
																															1	1	2	696	1.88595814362634	0.00697718025185168
																															1	1	2	697	1.88595814362634	0.0072997520910576
																															1	1	2	698	1.88886129017919	0.00600946473423392
																															1	1	2	699	1.88853871833999	0.0072997520910576
																															1	1	2	700	1.89015157753602	0.00697718025185168
																															1	1	2	701	1.89724815799855	0.00633203657343984
																															1	1	2	702	1.89015157753602	0.00697718025185168
																															1	1	2	703	1.89240958041046	0.00633203657343984
																															1	1	2	704	1.8895064338576	0.00697718025185168
																															1	1	2	705	1.89369986776728	0.00697718025185168
																															1	1	2	706	1.89015157753602	0.00697718025185168
																															1	1	2	707	1.89305472408887	0.0072997520910576
																															1	1	2	708	1.89079672121443	0.00665460841264576
																															1	1	2	709	1.89402243960649	0.00665460841264576
																															1	1	2	710	1.89208700857125	0.0072997520910576
																															1	1	2	711	1.89305472408887	0.00697718025185168
																															1	1	2	712	1.89144186489284	0.00665460841264576
																															1	1	2	713	1.89047414937522	0.00697718025185168
																															1	1	2	714	1.89111929305363	0.0072997520910576
																															1	1	2	715	1.88724843098316	0.00762232393026352
																															1	1	2	716	1.8895064338576	0.00697718025185168
																															1	1	2	717	1.88563557178713	0.00697718025185168
																															1	1	2	718	1.88724843098316	0.00665460841264576
																															1	1	2	719	1.88724843098316	0.00697718025185168
																															1	1	2	720	1.89111929305363	0.00697718025185168
																															1	1	2	721	1.88821614650078	0.00665460841264576
																															1	1	2	722	1.89015157753602	0.0072997520910576
																															1	1	2	723	1.89015157753602	0.00697718025185168
																															1	1	2	724	1.89369986776728	0.00697718025185168
																															1	1	2	725	1.89176443673205	0.00697718025185168
																															1	1	2	726	1.89240958041046	0.00633203657343984
																															1	1	2	727	1.89079672121443	0.00762232393026352
																															1	1	2	728	1.89176443673205	0.00600946473423392
																															1	1	2	729	1.89628044248093	0.00665460841264576
																															1	1	2	730	1.88853871833999	0.00762232393026352
																															1	1	2	731	1.89144186489284	0.00633203657343984
																															1	1	2	732	1.88886129017919	0.00697718025185168
																															1	1	2	733	1.89305472408887	0.00665460841264576
																															1	1	2	734	1.8895064338576	0.00633203657343984
																															1	1	2	735	1.89337729592808	0.005686892895028
																															1	1	2	736	1.8891838620184	0.0072997520910576
																															1	1	2	737	1.89240958041046	0.00665460841264576
																															1	1	2	738	1.88982900569681	0.00697718025185168
																															1	1	2	739	1.88982900569681	0.00697718025185168
																															1	1	2	740	1.88886129017919	0.00697718025185168
																															1	1	2	741	1.8895064338576	0.00697718025185168
																															1	1	2	742	1.89015157753602	0.00665460841264576
																															1	1	2	743	1.88982900569681	0.00633203657343984
																															1	1	2	744	1.8946675832849	0.00697718025185168
																															1	1	2	745	1.88886129017919	0.00665460841264576
																															1	1	2	746	1.89079672121443	0.0072997520910576
																															1	1	2	747	1.88886129017919	0.00697718025185168
																															1	1	2	748	1.89176443673205	0.00697718025185168
																															1	1	2	749	1.88789357466158	0.00794489576946944
																															1	1	2	750	1.8895064338576	0.00665460841264576
																															1	1	2	751	1.88563557178713	0.00665460841264576
																															1	1	2	752	1.8895064338576	0.00697718025185168
																															1	1	2	753	1.88692585914396	0.00697718025185168
																															1	1	2	754	1.88886129017919	0.00665460841264576
																															1	1	2	755	1.88853871833999	0.0072997520910576
																															1	1	2	756	1.89047414937522	0.00633203657343984
																															1	1	2	757	1.89757072983775	0.00697718025185168
																															1	1	2	758	1.89176443673205	0.00697718025185168
																															1	1	2	759	1.89628044248093	0.00665460841264576
																															1	1	2	760	1.89240958041046	0.00697718025185168
																															1	1	2	761	1.89628044248093	0.00697718025185168
																															1	1	2	762	1.89176443673205	0.00697718025185168
																															1	1	2	763	1.89208700857125	0.00697718025185168
																															1	1	2	764	1.8891838620184	0.0072997520910576
																															1	1	2	765	1.89047414937522	0.00665460841264576
																															1	1	2	766	1.88821614650078	0.0072997520910576
																															1	1	2	767	1.88982900569681	0.00665460841264576
																															1	1	2	768	1.88692585914396	0.00697718025185168
																															1	1	2	769	1.88821614650078	0.00762232393026352
																															1	1	2	770	1.88724843098316	0.00600946473423392
																															1	1	2	771	1.88757100282237	0.00697718025185168
																															1	1	2	772	1.89240958041046	0.00697718025185168
																															1	1	2	773	1.88628071546555	0.00536432105582207
																															1	1	2	774	1.88757100282237	0.00665460841264576
																															1	1	2	775	1.88660328730475	0.00665460841264576
																															1	1	2	776	1.89176443673205	0.0072997520910576
																															1	1	2	777	1.88757100282237	0.00697718025185168
																															1	1	2	778	1.89015157753602	0.00762232393026352
																															1	1	2	779	1.88821614650078	0.00697718025185168
																															1	1	2	780	1.89337729592808	0.00697718025185168
																															1	1	2	781	1.89111929305363	0.00697718025185168
																															1	1	2	782	1.89434501144569	0.00665460841264576
																															1	1	2	783	1.89273215224966	0.0072997520910576
																															1	1	2	784	1.89337729592808	0.00697718025185168
																															1	1	2	785	1.89499015512411	0.0072997520910576
																															1	1	2	786	1.88886129017919	0.00600946473423392
																															1	1	2	787	1.8891838620184	0.00600946473423392
																															1	1	2	788	1.88724843098316	0.00697718025185168
																															1	1	2	789	1.8895064338576	0.00697718025185168
																															1	1	2	790	1.88628071546555	0.00665460841264576
																															1	1	2	791	1.88982900569681	0.00633203657343984
																															1	1	2	792	1.88692585914396	0.00600946473423392
																															1	1	2	793	1.88853871833999	0.00665460841264576
																															1	1	2	794	1.88757100282237	0.00794489576946944
																															1	1	2	795	1.89047414937522	0.00633203657343984
																															1	1	2	796	1.88789357466158	0.00697718025185168
																															1	1	2	797	1.89015157753602	0.00665460841264576
																															1	1	2	798	1.88982900569681	0.00697718025185168
																															1	1	2	799	1.89111929305363	0.00633203657343984
																															1	1	2	800	1.89886101719458	0.00665460841264576
																															1	1	2	801	1.89144186489284	0.00697718025185168
																															1	1	2	802	1.89434501144569	0.00697718025185168
																															1	1	2	803	1.89337729592808	0.00697718025185168
																															1	1	2	804	1.89853844535537	0.00665460841264576
																															1	1	2	805	1.89208700857125	0.00665460841264576
																															1	1	2	806	1.89531272696331	0.00665460841264576
																															1	1	2	807	1.89273215224966	0.00697718025185168
																															1	1	2	808	1.89531272696331	0.00697718025185168
																															1	1	2	809	1.89240958041046	0.005686892895028
																															1	1	2	810	1.89079672121443	0.00665460841264576
																															1	1	2	811	1.8891838620184	0.00697718025185168
																															1	1	2	812	1.88853871833999	0.00665460841264576
																															1	1	2	813	1.88982900569681	0.0072997520910576
																															1	1	2	814	1.88628071546555	0.00762232393026352
																															1	1	2	815	1.88821614650078	0.00665460841264576
																															1	1	2	816	1.88531299994793	0.0072997520910576
																															1	1	2	817	1.88853871833999	0.00762232393026352
																															1	1	2	818	1.88724843098316	0.00665460841264576
																															1	1	2	819	1.89144186489284	0.0072997520910576
																															1	1	2	820	1.88821614650078	0.0072997520910576
																															1	1	2	821	1.89208700857125	0.00697718025185168
																															1	1	2	822	1.89079672121443	0.00665460841264576
																															1	1	2	823	1.89402243960649	0.00697718025185168
																															1	1	2	824	1.89079672121443	0.00697718025185168
																															1	1	2	825	1.89305472408887	0.00697718025185168
																															1	1	2	826	1.89015157753602	0.00697718025185168
																															1	1	2	827	1.89111929305363	0.0072997520910576
																															1	1	2	828	1.89982873271219	0.00665460841264576
																															1	1	2	829	1.89047414937522	0.00762232393026352
																															1	1	2	830	1.89402243960649	0.00697718025185168
																															1	1	2	831	1.89176443673205	0.00665460841264576
																															1	1	2	832	1.89628044248093	0.00697718025185168
																															1	1	2	833	1.89208700857125	0.00697718025185168
																															1	1	2	834	1.89015157753602	0.00665460841264576
																															1	1	2	835	1.88660328730475	0.00697718025185168
																															1	1	2	836	1.88853871833999	0.00665460841264576
																															1	1	2	837	1.88821614650078	0.0072997520910576
																															1	1	2	838	1.88821614650078	0.00697718025185168
																															1	1	2	839	1.88821614650078	0.00665460841264576
																															1	1	2	840	1.89015157753602	0.00633203657343984
																															1	1	2	841	1.89176443673205	0.00762232393026352
																															1	1	2	842	1.89208700857125	0.00633203657343984
																															1	1	2	843	1.89595787064172	0.0072997520910576
																															1	1	2	844	1.89176443673205	0.00697718025185168
																															1	1	2	845	1.8946675832849	0.0072997520910576
																															1	1	2	846	1.89240958041046	0.00697718025185168
																															1	1	2	847	1.89595787064172	0.0072997520910576
																															1	1	2	848	1.88982900569681	0.00762232393026352
																															1	1	2	849	1.89208700857125	0.00665460841264576
																															1	1	2	850	1.89015157753602	0.00697718025185168
																															1	1	2	851	1.89240958041046	0.00665460841264576
																															1	1	2	852	1.8891838620184	0.00697718025185168
																															1	1	2	853	1.88982900569681	0.00665460841264576
																															1	1	2	854	1.88757100282237	0.00665460841264576
																															1	1	2	855	1.88886129017919	0.00762232393026352
																															1	1	2	856	1.89595787064172	0.00826746760867536
																															1	1	2	857	1.88821614650078	0.00665460841264576
																															1	1	2	858	1.8895064338576	0.00633203657343984
																															1	1	2	859	1.88757100282237	0.00762232393026352
																															1	1	2	860	1.89015157753602	0.00665460841264576
																															1	1	2	861	1.88660328730475	0.0072997520910576
																															1	1	2	862	1.88821614650078	0.00665460841264576
																															1	1	2	863	1.88660328730475	0.0072997520910576
																															1	1	2	864	1.88757100282237	0.00665460841264576
																															1	1	2	865	1.88660328730475	0.00697718025185168
																															1	1	2	866	1.88982900569681	0.00536432105582207
																															1	1	2	867	1.88757100282237	0.00633203657343984
																															1	1	2	868	1.88982900569681	0.0072997520910576
																															1	1	2	869	1.88982900569681	0.00697718025185168
																															1	1	2	870	1.8895064338576	0.00697718025185168
																															1	1	2	871	1.89434501144569	0.00794489576946944
																															1	1	2	872	1.88853871833999	0.00633203657343984
																															1	1	2	873	1.89111929305363	0.00665460841264576
																															1	1	2	874	1.8891838620184	0.00762232393026352
																															1	1	2	875	1.89402243960649	0.00600946473423392
																															1	1	2	876	1.88982900569681	0.00665460841264576
																															1	1	2	877	1.89369986776728	0.0072997520910576
																															1	1	2	878	1.89273215224966	0.00633203657343984
																															1	1	2	879	1.89563529880252	0.00633203657343984
																															1	1	2	880	1.89402243960649	0.00665460841264576
																															1	1	2	881	1.89499015512411	0.00536432105582207
																															1	1	2	882	1.89047414937522	0.0072997520910576
																															1	1	2	883	1.8891838620184	0.00697718025185168
																															1	1	2	884	1.89369986776728	0.00697718025185168
																															1	1	2	885	1.88595814362634	0.00697718025185168
																															1	1	2	886	1.88595814362634	0.00633203657343984
																															1	1	2	887	1.88434528443031	0.00762232393026352
																															1	1	2	888	1.88789357466158	0.005686892895028
																															1	1	2	889	1.88499042810872	0.00762232393026352
																															1	1	2	890	1.88692585914396	0.00697718025185168
																															1	1	2	891	1.88628071546555	0.00697718025185168
																															1	1	2	892	1.88757100282237	0.00665460841264576
																															1	1	2	893	1.88628071546555	0.00665460841264576
																															1	1	2	894	1.88886129017919	0.00665460841264576
																															1	1	2	895	1.88628071546555	0.0072997520910576
																															1	1	2	896	1.88853871833999	0.00697718025185168
																															1	1	2	897	1.88724843098316	0.0072997520910576
																															1	1	2	898	1.88886129017919	0.00665460841264576
																															1	1	2	899	1.89499015512411	0.00665460841264576
																															1	1	2	900	1.8895064338576	0.00697718025185168
																															1	1	2	901	1.89434501144569	0.00697718025185168
																															1	1	2	902	1.89337729592808	0.00697718025185168
																															1	1	2	903	1.89757072983775	0.00665460841264576
																															1	1	2	904	1.8946675832849	0.00697718025185168
																															1	1	2	905	1.89499015512411	0.00633203657343984
																															1	1	2	906	1.89176443673205	0.00665460841264576
																															1	1	2	907	1.89079672121443	0.0072997520910576
																															1	1	2	908	1.8895064338576	0.00697718025185168
																															1	1	2	909	1.88853871833999	0.00697718025185168
																															1	1	2	910	1.88724843098316	0.00697718025185168
																															1	1	2	911	1.8895064338576	0.00697718025185168
																															1	1	2	912	1.89434501144569	0.00697718025185168
																															1	1	2	913	1.88886129017919	0.00665460841264576
																															1	1	2	914	1.8895064338576	0.00697718025185168
																															1	1	2	915	1.88757100282237	0.00697718025185168
																															1	1	2	916	1.89079672121443	0.00697718025185168
																															1	1	2	917	1.88692585914396	0.00697718025185168
																															1	1	2	918	1.8895064338576	0.00697718025185168
																															1	1	2	919	1.88724843098316	0.00633203657343984
																															1	1	2	920	1.8891838620184	0.00697718025185168
																															1	1	2	921	1.88789357466158	0.00633203657343984
																															1	1	2	922	1.89176443673205	0.0072997520910576
																															1	1	2	923	1.8895064338576	0.00633203657343984
																															1	1	2	924	1.89079672121443	0.00633203657343984
																															1	1	2	925	1.89111929305363	0.00665460841264576
																															1	1	2	926	1.89079672121443	0.00697718025185168
																															1	1	2	927	1.89789330167696	0.00665460841264576
																															1	1	2	928	1.89144186489284	0.00697718025185168
																															1	1	2	929	1.89402243960649	0.0072997520910576
																															1	1	2	930	1.89176443673205	0.00633203657343984
																															1	1	2	931	1.89337729592808	0.00665460841264576
																															1	1	2	932	1.88853871833999	0.00665460841264576
																															1	1	2	933	1.88853871833999	0.00665460841264576
																															1	1	2	934	1.88660328730475	0.00633203657343984
																															1	1	2	935	1.88724843098316	0.00665460841264576
																															1	1	2	936	1.88531299994793	0.0072997520910576
																															1	1	2	937	1.88692585914396	0.00633203657343984
																															1	1	2	938	1.88499042810872	0.00697718025185168
																															1	1	2	939	1.88724843098316	0.00697718025185168
																															1	1	2	940	1.89305472408887	0.00633203657343984
																															1	1	2	941	1.8895064338576	0.0072997520910576
																															1	1	2	942	1.89240958041046	0.0072997520910576
																															1	1	2	943	1.89015157753602	0.00633203657343984
																															1	1	2	944	1.89434501144569	0.0072997520910576
																															1	1	2	945	1.89144186489284	0.00633203657343984
																															1	1	2	946	1.89531272696331	0.0072997520910576
																															1	1	2	947	1.89144186489284	0.00826746760867536
																															1	1	2	948	1.89337729592808	0.00665460841264576
																															1	1	2	949	1.89144186489284	0.0072997520910576
																															1	1	2	950	1.89402243960649	0.00697718025185168
																															1	1	2	951	1.89337729592808	0.00600946473423392
																															1	1	2	952	1.89337729592808	0.00697718025185168
																															1	1	2	953	1.89240958041046	0.00665460841264576
																															1	1	2	954	1.89144186489284	0.00697718025185168
																															1	1	2	955	1.89660301432014	0.00665460841264576
																															1	1	2	956	1.88724843098316	0.00697718025185168
																															1	1	2	957	1.88692585914396	0.00697718025185168
																															1	1	2	958	1.88724843098316	0.00665460841264576
																															1	1	2	959	1.89015157753602	0.00633203657343984
																															1	1	2	960	1.88724843098316	0.00697718025185168
																															1	1	2	961	1.89015157753602	0.0072997520910576
																															1	1	2	962	1.88853871833999	0.00697718025185168
																															1	1	2	963	1.89273215224966	0.0072997520910576
																															1	1	2	964	1.89111929305363	0.00633203657343984
																															1	1	2	965	1.89402243960649	0.005686892895028
																															1	1	2	966	1.89240958041046	0.00697718025185168
																															1	1	2	967	1.89337729592808	0.00633203657343984
																															1	1	2	968	1.89305472408887	0.00697718025185168
																															1	1	2	969	1.88982900569681	0.00826746760867536
																															1	1	2	970	1.89208700857125	0.00697718025185168
																															1	1	2	971	1.88853871833999	0.0072997520910576
																															1	1	2	972	1.89111929305363	0.00697718025185168
																															1	1	2	973	1.88821614650078	0.00762232393026352
																															1	1	2	974	1.89240958041046	0.00633203657343984
																															1	1	2	975	1.8891838620184	0.00633203657343984
																															1	1	2	976	1.89176443673205	0.0072997520910576
																															1	1	2	977	1.89079672121443	0.00697718025185168
																															1	1	2	978	1.89240958041046	0.00665460841264576
																															1	1	2	979	1.88982900569681	0.00697718025185168
																															1	1	2	980	1.89047414937522	0.00600946473423392
																															1	1	2	981	1.8891838620184	0.00633203657343984
																															1	1	2	982	1.88886129017919	0.00697718025185168
																															1	1	2	983	1.89692558615934	0.0072997520910576
																															1	1	2	984	1.88982900569681	0.00633203657343984
																															1	1	2	985	1.89079672121443	0.00633203657343984
																															1	1	2	986	1.88982900569681	0.0072997520910576
																															1	1	2	987	1.89369986776728	0.0072997520910576
																															1	1	2	988	1.8891838620184	0.00697718025185168
																															1	1	2	989	1.88982900569681	0.0072997520910576
																															1	1	2	990	1.88789357466158	0.00762232393026352
																															1	1	2	991	1.8895064338576	0.00600946473423392
																															1	1	2	992	1.88789357466158	0.00762232393026352
																															1	1	2	993	1.89015157753602	0.00665460841264576
																															1	1	2	994	1.88886129017919	0.00665460841264576
																															1	1	2	995	1.8895064338576	0.00697718025185168
																															1	1	2	996	1.89176443673205	0.00633203657343984
																															1	1	2	997	1.88982900569681	0.00697718025185168
																															1	1	2	998	1.89595787064172	0.00697718025185168
																															1	1	2	999	1.89144186489284	0.00665460841264576
[truncated: 158,001 more rows]

## Sheet: Control 3-4
Protocol Name	Result Name	Technician																													Chamber	BlockId	TrialId	X	ASR	Stimuli				ASRp
song20250429	Control 3-4	Administrator																													1	1	1	1	1.88982900569681	0.00697718025185168				Chamber	Block ID	Trial ID	Period	Decibel	PeakVal	BlockId0	TrialId0
																															1	1	1	2	1.88111956603825	3.25753360392991				1	2	1	PrePulse	74	0	2	30
Experiment Protocol																															1	1	1	3	1.87886156316381	3.25785617576912				1	2	1	Startle	120	0.1225	2	30
Name	Experiment Type	Protocol Type	first Createed By	Last Updated By	Last Updated Ts																										1	1	1	4	1.87079726718366	3.25721103209071				1	2	2	PrePulse	74	0	2	25
song20250429	Startle	PrepulseInhibition	Administrator	Administrator																											1	1	1	5	1.87241012637969	3.25914646312594				1	2	2	Startle	120	0.1683	2	25
																															1	1	1	6	1.86563611775637	3.25785617576912				1	2	3	PrePulse	74	0	2	28
Experiment result																															1	1	1	7	1.86015239648987	3.25753360392991				1	2	3	Startle	120	0.1357	2	28
Name	RunStatus	StartTime	Experimenter	CompleteTime	Platform Chamber1	Platform Chamber2	Platform Chamber3	Platform Chamber4	ASR																						1	1	1	8	1.85079781315289	3.25817874760833				1	2	7	PrePulse	74	0	2	22
Control 3-4	InProgress;Cancelled,Complete,	2025/11/1 12:05:35	Administrator	2025/11/1 12:36:46	1.88446044921875	1.81396484375	0.02685546875	0.31951904296875	100																						1	1	1	9	1.84886238211766	3.25753360392991				1	2	7	Startle	120	0.0515	2	22
																															1	1	1	10	1.85079781315289	3.25817874760833				1	2	11	PrePulse	74	0	2	27
Trial Result																															1	1	1	11	1.85563639074098	3.2565658884123				1	2	11	Startle	120	0.1770	2	27
Chamber ID	Block ID	Trial ID	Period	Peak Value	Peak Time	Latency	Total Value	TotalAbsolute Value	AvgAbsolute Value	ARS Stdev	Avg Value	Rms Value	Start	End	PeriodCnt	Db	BlockId0	TrialId0													1	1	1	12	1.85724924993701	3.25721103209071				1	2	24	PrePulse	74	0	2	24
1	1	1	Null	0	0	0	0	0	0	0	0	0	0	0	0	0	1	1													1	1	1	13	1.86531354591716	3.2568884602515				1	2	24	Startle	120	0.1999	2	24
1	1	1	Startle	0.0363	35	34	-0.3526	1.7090	0.0169	0.0217	-0.0035	0.0219	1	40	40	120	1	1													1	1	1	14	1.8782164194854	3.25817874760833				1	2	26	PrePulse	74	0	2	29
1	1	2	Null	0	0	0	0	0	0	0	0	0	0	0	0	0	1	2													1	1	1	15	1.88724843098316	3.25785617576912				1	2	26	Startle	120	0.0167	2	29
1	1	2	Startle	0.0399	73	72	-0.5342	2.2330	0.0221	0.0266	-0.0053	0.0270	1	40	40	120	1	2													1	1	1	16	1.89240958041046	3.25721103209071				1	2	28	PrePulse	74	0	2	26
1	1	3	Null	0	0	0	0	0	0	0	0	0	0	0	0	0	1	3													1	1	1	17	1.89724815799855	3.2568884602515				1	2	28	Startle	120	0.1350	2	26
1	1	3	Startle	0.1912	22	21	-0.3497	3.7370	0.0370	0.0556	-0.0035	0.0555	1	40	40	120	1	3													1	1	1	18	1.89434501144569	3.25817874760833				1	2	40	PrePulse	74	0	2	23
1	1	4	Null	0	0	0	0	0	0	0	0	0	0	0	0	0	1	4													1	1	1	19	1.89176443673205	3.25753360392991				1	2	40	Startle	120	0.0173	2	23
1	1	4	Startle	0.1438	22	21	-0.3410	3.5513	0.0352	0.0483	-0.0034	0.0482	1	40	40	120	1	4													1	1	1	20	1.87660356028937	3.2568884602515				1	2	59	PrePulse	74	0	2	21
1	1	5	Null	0	0	0	0	0	0	0	0	0	0	0	0	0	1	5													1	1	1	21	1.86563611775637	3.25721103209071				1	2	59	Startle	120	0.0092	2	21
1	1	5	Startle	0.4531	21	20	-0.3239	8.5302	0.0845	0.1363	-0.0032	0.1357	1	40	40	120	1	5													1	1	1	22	1.84853981027845	3.25721103209071
1	1	6	Null	0	0	0	0	0	0	0	0	0	0	0	0	0	1	6													1	1	1	23	1.84499152004719	3.2568884602515				ASRc
1	1	6	Startle	0.2725	22	21	-0.4013	5.3393	0.0529	0.0828	-0.0040	0.0825	1	40	40	120	1	6													1	1	1	24	1.83370150567498	3.25624331657309				Chamber	Block ID	Trial ID	Period	Decibel	PeakVal	BlockId0	TrialId0
1	1	7	Null	0	0	0	0	0	0	0	0	0	0	0	0	0	1	7													1	1	1	25	1.83305636199657	3.25753360392991				1	2	4	Startle	120	0.0254	2	17
1	1	7	Startle	0.3805	21	20	-0.3652	6.8832	0.0682	0.1097	-0.0036	0.1092	1	40	40	120	1	7													1	1	1	26	1.83112093096133	3.2568884602515				1	2	9	Startle	120	0.2228	2	14
1	1	8	Null	0	0	0	0	0	0	0	0	0	0	0	0	0	1	8													1	1	1	27	1.84402380452957	3.25785617576912				1	2	12	Startle	120	0.1847	2	11
1	1	8	Startle	0.2918	22	21	-0.3968	5.4266	0.0537	0.0872	-0.0039	0.0868	1	40	40	120	1	8													1	1	1	28	1.85563639074098	3.25785617576912				1	2	18	Startle	120	0.1608	2	13
1	1	9	Null	0	0	0	0	0	0	0	0	0	0	0	0	0	1	9													1	1	1	29	1.8730552700581	3.2568884602515				1	2	25	Startle	120	0.0463	2	18
1	1	9	Startle	0.3263	22	21	-0.2868	5.9905	0.0593	0.0956	-0.0028	0.0951	1	40	40	120	1	9													1	1	1	30	1.88531299994793	3.25721103209071				1	2	43	Startle	120	0.0173	2	19
1	1	10	Null	0	0	0	0	0	0	0	0	0	0	0	0	0	1	10													1	1	1	31	1.9001513045514	3.25817874760833				1	2	46	Startle	120	0.0796	2	15
1	1	10	Startle	0.2618	22	21	-0.5339	4.5827	0.0454	0.0732	-0.0053	0.0731	1	40	40	120	1	10													1	1	1	32	1.91305417811964	3.25817874760833				1	2	50	Startle	120	0.0815	2	12
1	2	1	Null	0	0	0	0	0	0	0	0	0	0	0	0	0	2	30													1	1	1	33	1.92015075858217	3.25785617576912				1	2	51	Startle	120	0.1076	2	20
1	2	1	PrePulse	0.0054	69	68	-0.2816	0.4107	0.0041	0.0041	-0.0028	0.0050	1	20	20	74	2	30													1	1	1	34	1.91757018386852	3.25850131944753				1	2	53	Startle	120	0.2847	2	16
1	2	1	Startle	0.1225	142	21	-0.4065	2.6453	0.0262	0.0379	-0.0040	0.0379	121	160	40	120	2	30													1	1	1	35	1.92079590226058	3.2565658884123
1	2	2	Null	0	0	0	0	0	0	0	0	0	0	0	0	0	2	25													1	1	1	36	1.91240903444123	3.2568884602515				PPI Pct
1	2	2	PrePulse	0.0047	100	99	-0.3571	0.4040	0.0040	0.0034	-0.0035	0.0049	1	20	20	74	2	25													1	1	1	37	1.9111187470844	3.25785617576912				Chamber	Type	Details	Result
1	2	2	Startle	0.1683	142	21	-0.5229	3.7972	0.0376	0.0544	-0.0052	0.0544	121	160	40	120	2	25													1	1	1	38	1.8946675832849	3.2568884602515				1	ASRp	((0.1225 +0.1683 +0.1357 +0.0515 +0.1770 +0.1999 +0.0167 +0.1350 +0.0173 +0.0092)/10)*100	10.3310
1	2	3	Null	0	0	0	0	0	0	0	0	0	0	0	0	0	2	28													1	1	1	39	1.89144186489284	3.25624331657309				1	ASRc	((0.0254 +0.2228 +0.1847 +0.1608 +0.0463 +0.0173 +0.0796 +0.0815 +0.1076 +0.2847)/10)*100	12.1070
1	2	3	PrePulse	0.0076	98	97	-0.3745	0.4616	0.0046	0.0040	-0.0037	0.0054	1	20	20	74	2	28													1	1	1	40	1.88079699419904	3.25721103209071				1	PPI Pct	(ASRc - ASRp)/ASRc	14.6692
1	2	3	Startle	0.1357	143	22	-0.4552	2.9017	0.0287	0.0422	-0.0045	0.0423	121	160	40	120	2	28													1	1	1	41	1.88660328730475	3.25882389128674
1	2	4	Null	0	0	0	0	0	0	0	0	0	0	0	0	0	2	17													1	1	1	42	1.87918413500302	0.00762232393026352				ASRp
1	2	4	Startle	0.0254	143	22	-0.3523	1.1573	0.0115	0.0132	-0.0035	0.0136	121	160	40	120	2	17													1	1	1	43	1.88434528443031	0.0072997520910576				Chamber	Block ID	Trial ID	Period	Decibel	PeakVal	BlockId0	TrialId0
1	2	5	Null	0	0	0	0	0	0	0	0	0	0	0	0	0	2	34													1	1	1	44	1.87595841661096	0.00762232393026352				1	2	5	PrePulse	78	0	2	34
1	2	5	PrePulse	0.0067	71	70	-0.3200	0.4401	0.0044	0.0042	-0.0032	0.0053	1	20	20	78	2	34													1	1	1	45	1.88660328730475	0.0072997520910576				1	2	5	Startle	120	0.0134	2	34
1	2	5	Startle	0.0134	157	36	-0.3168	0.5865	0.0058	0.0073	-0.0031	0.0079	121	160	40	120	2	34													1	1	1	46	1.87757127580699	0.00762232393026352				1	2	6	PrePulse	78	0	2	35
1	2	6	Null	0	0	0	0	0	0	0	0	0	0	0	0	0	2	35													1	1	1	47	1.88176470971666	0.0072997520910576				1	2	6	Startle	120	0.0609	2	35
1	2	6	PrePulse	0.0083	51	50	-0.3010	0.4962	0.0049	0.0049	-0.0030	0.0057	1	20	20	78	2	35													1	1	1	48	1.87047469534446	0.00697718025185168				1	2	16	PrePulse	78	0	2	31
1	2	6	Startle	0.0609	143	22	-0.3578	1.5810	0.0157	0.0222	-0.0035	0.0224	121	160	40	120	2	35													1	1	1	49	1.87886156316381	0.0072997520910576				1	2	16	Startle	120	0.1167	2	31
1	2	7	Null	0	0	0	0	0	0	0	0	0	0	0	0	0	2	22													1	1	1	50	1.88047442235984	0.00762232393026352				1	2	19	PrePulse	78	0	2	40
1	2	7	PrePulse	0.0067	34	33	-0.3794	0.4756	0.0047	0.0041	-0.0038	0.0056	1	20	20	74	2	22													1	1	1	51	1.89369986776728	0.00697718025185168				1	2	19	Startle	120	0.1360	2	40
1	2	7	Startle	0.0515	143	22	-0.3303	1.3233	0.0131	0.0192	-0.0033	0.0194	121	160	40	120	2	22													1	1	1	52	1.89208700857125	0.00633203657343984				1	2	20	PrePulse	78	0	2	33
1	2	8	Null	0	0	0	0	0	0	0	0	0	0	0	0	0	2	5													1	1	1	53	1.9053124539787	0.0072997520910576				1	2	20	Startle	120	0.0428	2	33
1	2	8	PrePulse	0.0083	81	80	-0.4052	0.5840	0.0058	0.0072	-0.0040	0.0082	1	20	20	66	2	5													1	1	1	54	1.90402216662187	0.00697718025185168				1	2	29	PrePulse	78	0	2	36
1	2	9	Null	0	0	0	0	0	0	0	0	0	0	0	0	0	2	14													1	1	1	55	1.91144131892361	0.0072997520910576				1	2	29	Startle	120	0.0728	2	36
1	2	9	Startle	0.2228	142	21	-0.3426	4.7002	0.0465	0.0719	-0.0034	0.0716	121	160	40	120	2	14													1	1	1	56	1.89305472408887	0.00697718025185168				1	2	30	PrePulse	78	0	2	38
1	2	10	Null	0	0	0	0	0	0	0	0	0	0	0	0	0	2	52													1	1	1	57	1.88337756891269	0.0072997520910576				1	2	30	Startle	120	0.0289	2	38
1	2	10	PrePulse	0.0150	83	82	-0.2523	0.8451	0.0084	0.0104	-0.0025	0.0106	1	20	20	74	2	52													1	1	1	58	1.85950725281145	0.0072997520910576				1	2	33	PrePulse	78	0	2	39
1	2	11	Null	0	0	0	0	0	0	0	0	0	0	0	0	0	2	27													1	1	1	59	1.85563639074098	0.00762232393026352				1	2	33	Startle	120	0.1015	2	39
1	2	11	PrePulse	0.0144	60	59	-0.5868	0.9788	0.0097	0.0110	-0.0058	0.0124	1	20	20	74	2	27													1	1	1	60	1.83563693671022	0.0072997520910576				1	2	44	PrePulse	78	0	2	32
1	2	11	Startle	0.1770	144	23	-0.1958	4.0566	0.0402	0.0590	-0.0019	0.0587	121	160	40	120	2	27													1	1	1	61	1.83628208038863	0.00826746760867536				1	2	44	Startle	120	0.0134	2	32
1	2	12	Null	0	0	0	0	0	0	0	0	0	0	0	0	0	2	11													1	1	1	62	1.83015321544372	0.0072997520910576				1	2	55	PrePulse	78	0	2	37
1	2	12	Startle	0.1847	142	21	-0.3961	4.1604	0.0412	0.0611	-0.0039	0.0609	121	160	40	120	2	11													1	1	1	63	1.84950752579607	0.00762232393026352				1	2	55	Startle	120	0.0670	2	37
1	2	13	Null	0	0	0	0	0	0	0	0	0	0	0	0	0	2	43													1	1	1	64	1.85595896258019	0.00762232393026352
1	2	13	PrePulse	0.0228	56	55	-0.3400	1.0558	0.0105	0.0122	-0.0034	0.0126	1	20	20	86	2	43													1	1	1	65	1.8727326982189	0.0072997520910576				ASRc
1	2	13	Startle	0.0209	178	57	-0.4152	1.0729	0.0106	0.0122	-0.0041	0.0128	121	160	40	120	2	43													1	1	1	66	1.87789384764619	0.00794489576946944				Chamber	Block ID	Trial ID	Period	Decibel	PeakVal	BlockId0	TrialId0
1	2	14	Null	0	0	0	0	0	0	0	0	0	0	0	0	0	2	2													1	1	1	67	1.88789357466158	0.00697718025185168				1	2	4	Startle	120	0.0254	2	17
1	2	14	PrePulse	0.0118	29	28	-0.2587	0.5423	0.0054	0.0062	-0.0026	0.0067	1	20	20	66	2	2													1	1	1	68	1.89208700857125	0.0072997520910576				1	2	9	Startle	120	0.2228	2	14
1	2	15	Null	0	0	0	0	0	0	0	0	0	0	0	0	0	2	6													1	1	1	69	1.89240958041046	0.0072997520910576				1	2	12	Startle	120	0.1847	2	11
1	2	15	PrePulse	0.0067	93	92	-0.3952	0.5796	0.0057	0.0062	-0.0039	0.0073	1	20	20	66	2	6													1	1	1	70	1.88789357466158	0.00633203657343984				1	2	18	Startle	120	0.1608	2	13
1	2	16	Null	0	0	0	0	0	0	0	0	0	0	0	0	0	2	31													1	1	1	71	1.88660328730475	0.00697718025185168				1	2	25	Startle	120	0.0463	2	18
1	2	16	PrePulse	0.0044	34	33	-0.3255	0.3964	0.0039	0.0032	-0.0032	0.0045	1	20	20	78	2	31													1	1	1	72	1.88757100282237	0.00697718025185168				1	2	43	Startle	120	0.0173	2	19
1	2	16	Startle	0.1167	141	20	-0.3584	2.4629	0.0244	0.0370	-0.0035	0.0370	121	160	40	120	2	31													1	1	1	73	1.88757100282237	0.00697718025185168				1	2	46	Startle	120	0.0796	2	15
1	2	17	Null	0	0	0	0	0	0	0	0	0	0	0	0	0	2	41													1	1	1	74	1.88886129017919	0.00633203657343984				1	2	50	Startle	120	0.0815	2	12
1	2	17	PrePulse	0.0360	41	40	0.3722	1.4203	0.0141	0.0159	0.0037	0.0162	1	20	20	86	2	41													1	1	1	75	1.8891838620184	0.00697718025185168				1	2	51	Startle	120	0.1076	2	20
1	2	17	Startle	0.0247	146	25	-0.3265	0.8319	0.0082	0.0102	-0.0032	0.0107	121	160	40	120	2	41													1	1	1	76	1.89240958041046	0.00697718025185168				1	2	53	Startle	120	0.2847	2	16
1	2	18	Null	0	0	0	0	0	0	0	0	0	0	0	0	0	2	13													1	1	1	77	1.89273215224966	0.00794489576946944
1	2	18	Startle	0.1608	142	21	-0.2749	4.0063	0.0397	0.0580	-0.0027	0.0578	121	160	40	120	2	13													1	1	1	78	1.89369986776728	0.00794489576946944				PPI Pct
1	2	19	Null	0	0	0	0	0	0	0	0	0	0	0	0	0	2	40													1	1	1	79	1.89144186489284	0.0072997520910576				Chamber	Type	Details	Result
1	2	19	PrePulse	0.0118	32	31	-0.4800	0.7856	0.0078	0.0079	-0.0048	0.0092	1	20	20	78	2	40													1	1	1	80	1.89208700857125	0.00697718025185168				1	ASRp	((0.0134 +0.0609 +0.1167 +0.1360 +0.0428 +0.0728 +0.0289 +0.1015 +0.0134 +0.0670)/10)*100	6.5340
1	2	19	Startle	0.1360	143	22	-0.4142	3.3371	0.0330	0.0444	-0.0041	0.0444	121	160	40	120	2	40													1	1	1	81	1.89757072983775	0.0072997520910576				1	ASRc	((0.0254 +0.2228 +0.1847 +0.1608 +0.0463 +0.0173 +0.0796 +0.0815 +0.1076 +0.2847)/10)*100	12.1070
1	2	20	Null	0	0	0	0	0	0	0	0	0	0	0	0	0	2	33													1	1	1	82	1.89950616087299	0.00794489576946944				1	PPI Pct	(ASRc - ASRp)/ASRc	46.0312
1	2	20	PrePulse	0.0244	15	14	-0.1790	0.8452	0.0084	0.0099	-0.0018	0.0100	1	20	20	78	2	33													1	1	1	83	1.90144159190822	0.00697718025185168
1	2	20	Startle	0.0428	142	21	-0.1910	1.2263	0.0121	0.0159	-0.0019	0.0160	121	160	40	120	2	33													1	1	1	84	1.90628016949631	0.00762232393026352				ASRp
1	2	21	Null	0	0	0	0	0	0	0	0	0	0	0	0	0	2	49													1	1	1	85	1.91240903444123	0.00697718025185168				Chamber	Block ID	Trial ID	Period	Decibel	PeakVal	BlockId0	TrialId0
1	2	21	PrePulse	0.0657	25	24	-0.4248	1.8377	0.0182	0.0236	-0.0042	0.0239	1	20	20	86	2	49													1	1	1	86	1.91595732467249	0.0072997520910576				1	2	13	PrePulse	86	0	2	43
1	2	21	Startle	0.0699	143	22	-0.3887	1.8689	0.0185	0.0254	-0.0038	0.0255	121	160	40	120	2	49													1	1	1	87	1.91531218099408	0.00697718025185168				1	2	13	Startle	120	0.0209	2	43
1	2	22	Null	0	0	0	0	0	0	0	0	0	0	0	0	0	2	9													1	1	1	88	1.91144131892361	0.00697718025185168				1	2	17	PrePulse	86	0	2	41
1	2	22	PrePulse	0.0041	64	63	-0.3219	0.3647	0.0036	0.0030	-0.0032	0.0044	1	20	20	66	2	9													1	1	1	89	1.9053124539787	0.0072997520910576				1	2	17	Startle	120	0.0247	2	41
1	2	23	Null	0	0	0	0	0	0	0	0	0	0	0	0	0	2	44													1	1	1	90	1.9001513045514	0.0072997520910576				1	2	21	PrePulse	86	0	2	49
1	2	23	PrePulse	0.0157	52	51	-0.2832	0.7480	0.0074	0.0083	-0.0028	0.0087	1	20	20	86	2	44													1	1	1	91	1.88789357466158	0.00697718025185168				1	2	21	Startle	120	0.0699	2	49
1	2	23	Startle	0.0102	210	89	-0.3300	0.4916	0.0049	0.0050	-0.0033	0.0060	121	160	40	120	2	44													1	1	1	92	1.8782164194854	0.00697718025185168				1	2	23	PrePulse	86	0	2	44
1	2	24	Null	0	0	0	0	0	0	0	0	0	0	0	0	0	2	24													1	1	1	93	1.86789412063081	0.00794489576946944				1	2	23	Startle	120	0.0102	2	44
1	2	24	PrePulse	0.0041	31	30	-0.3152	0.3702	0.0037	0.0031	-0.0031	0.0044	1	20	20	74	2	24													1	1	1	94	1.86918440798763	0.0072997520910576				1	2	31	PrePulse	86	0	2	42
1	2	24	Startle	0.1999	141	20	-0.4287	4.6906	0.0464	0.0701	-0.0042	0.0699	121	160	40	120	2	24													1	1	1	95	1.86531354591716	0.00697718025185168				1	2	31	Startle	120	0.0218	2	42
1	2	25	Null	0	0	0	0	0	0	0	0	0	0	0	0	0	2	18													1	1	1	96	1.86789412063081	0.00665460841264576				1	2	32	PrePulse	86	0	2	47
1	2	25	Startle	0.0463	173	52	-0.7445	1.6869	0.0167	0.0199	-0.0074	0.0211	121	160	40	120	2	18													1	1	1	97	1.87015212350525	0.00697718025185168				1	2	32	Startle	120	0.0431	2	47
1	2	26	Null	0	0	0	0	0	0	0	0	0	0	0	0	0	2	29													1	1	1	98	1.88079699419904	0.00794489576946944				1	2	47	PrePulse	86	0	2	46
1	2	26	PrePulse	0.0176	101	100	-0.7365	1.0255	0.0102	0.0104	-0.0073	0.0127	1	20	20	74	2	29													1	1	1	99	1.88466785626952	0.00762232393026352				1	2	47	Startle	120	0.0515	2	46
1	2	26	Startle	0.0167	170	49	-0.3361	0.7015	0.0069	0.0078	-0.0033	0.0085	121	160	40	120	2	29													1	1	1	100	1.8895064338576	0.00762232393026352				1	2	48	PrePulse	86	0	2	48
1	2	27	Null	0	0	0	0	0	0	0	0	0	0	0	0	0	2	4													1	1	1	101	1.88789357466158	0.0072997520910576				1	2	48	Startle	120	0.0131	2	48
1	2	27	PrePulse	0.0183	85	84	-0.2145	0.7018	0.0069	0.0084	-0.0021	0.0086	1	20	20	66	2	4													1	1	1	102	1.88886129017919	0.00697718025185168				1	2	56	PrePulse	86	0	2	45
1	2	28	Null	0	0	0	0	0	0	0	0	0	0	0	0	0	2	26													1	1	1	103	1.88757100282237	0.00697718025185168				1	2	56	Startle	120	0.0447	2	45
1	2	28	PrePulse	0.0212	15	14	-0.3668	0.9079	0.0090	0.0103	-0.0036	0.0108	1	20	20	74	2	26													1	1	1	104	1.88240985339507	0.00762232393026352				1	2	57	PrePulse	86	0	2	50
1	2	28	Startle	0.1350	142	21	-0.4168	3.3400	0.0331	0.0483	-0.0041	0.0483	121	160	40	120	2	26													1	1	1	105	1.87692613212857	0.00697718025185168				1	2	57	Startle	120	0.0176	2	50
1	2	29	Null	0	0	0	0	0	0	0	0	0	0	0	0	0	2	36													1	1	1	106	1.87241012637969	0.0072997520910576
1	2	29	PrePulse	0.0192	10	9	-0.3355	0.6977	0.0069	0.0078	-0.0033	0.0085	1	20	20	78	2	36													1	1	1	107	1.87499070109334	0.00762232393026352				ASRc
1	2	29	Startle	0.0728	164	43	-0.4839	2.1958	0.0217	0.0315	-0.0048	0.0317	121	160	40	120	2	36													1	1	1	108	1.8727326982189	0.00794489576946944				Chamber	Block ID	Trial ID	Period	Decibel	PeakVal	BlockId0	TrialId0
1	2	30	Null	0	0	0	0	0	0	0	0	0	0	0	0	0	2	38													1	1	1	109	1.87047469534446	0.00762232393026352				1	2	4	Startle	120	0.0254	2	17
1	2	30	PrePulse	0.0099	5	4	-0.2900	0.4597	0.0046	0.0049	-0.0029	0.0057	1	20	20	78	2	38													1	1	1	110	1.87144241086207	0.0072997520910576				1	2	9	Startle	120	0.2228	2	14
1	2	30	Startle	0.0289	176	55	-0.4739	1.2248	0.0121	0.0146	-0.0047	0.0153	121	160	40	120	2	38													1	1	1	111	1.87208755454048	0.0072997520910576				1	2	12	Startle	120	0.1847	2	11
1	2	31	Null	0	0	0	0	0	0	0	0	0	0	0	0	0	2	42													1	1	1	112	1.87724870396778	0.00665460841264576				1	2	18	Startle	120	0.1608	2	13
1	2	31	PrePulse	0.0086	88	87	-0.4003	0.5999	0.0059	0.0069	-0.0040	0.0079	1	20	20	86	2	42													1	1	1	113	1.87789384764619	0.00665460841264576				1	2	25	Startle	120	0.0463	2	18
1	2	31	Startle	0.0218	142	21	-0.2823	0.8644	0.0086	0.0106	-0.0028	0.0109	121	160	40	120	2	42													1	1	1	114	1.88079699419904	0.0072997520910576				1	2	43	Startle	120	0.0173	2	19
1	2	32	Null	0	0	0	0	0	0	0	0	0	0	0	0	0	2	47													1	1	1	115	1.88273242523428	0.0072997520910576				1	2	46	Startle	120	0.0796	2	15
1	2	32	PrePulse	0.0509	44	43	-0.4407	1.5230	0.0151	0.0185	-0.0044	0.0189	1	20	20	86	2	47													1	1	1	116	1.89144186489284	0.0072997520910576				1	2	50	Startle	120	0.0815	2	12
1	2	32	Startle	0.0431	160	39	-0.2765	0.9903	0.0098	0.0137	-0.0027	0.0139	121	160	40	120	2	47													1	1	1	117	1.89240958041046	0.00794489576946944				1	2	51	Startle	120	0.1076	2	20
1	2	33	Null	0	0	0	0	0	0	0	0	0	0	0	0	0	2	39													1	1	1	118	1.89660301432014	0.00762232393026352				1	2	53	Startle	120	0.2847	2	16
1	2	33	PrePulse	0.0067	7	6	-0.3074	0.4176	0.0041	0.0042	-0.0030	0.0052	1	20	20	78	2	39													1	1	1	119	1.89531272696331	0.00697718025185168
1	2	33	Startle	0.1015	143	22	-0.4197	2.3245	0.0230	0.0321	-0.0042	0.0322	121	160	40	120	2	39													1	1	1	120	1.90079644822981	0.0072997520910576				PPI Pct
1	2	34	Null	0	0	0	0	0	0	0	0	0	0	0	0	0	2	59													1	1	1	121	1.89886101719458	0.00762232393026352				Chamber	Type	Details	Result
1	2	34	PrePulse	0.0205	25	24	-0.3332	0.8533	0.0084	0.0099	-0.0033	0.0104	1	20	20	86	2	59													1	1	1	122	1.89660301432014	0.00633203657343984				1	ASRp	((0.0209 +0.0247 +0.0699 +0.0102 +0.0218 +0.0431 +0.0515 +0.0131 +0.0447 +0.0176)/10)*100	3.1750
1	2	35	Null	0	0	0	0	0	0	0	0	0	0	0	0	0	2	7													1	1	1	123	1.89047414937522	0.00697718025185168				1	ASRc	((0.0254 +0.2228 +0.1847 +0.1608 +0.0463 +0.0173 +0.0796 +0.0815 +0.1076 +0.2847)/10)*100	12.1070
1	2	35	PrePulse	0.0302	34	33	-0.4403	1.1416	0.0113	0.0134	-0.0044	0.0140	1	20	20	66	2	7													1	1	1	124	1.88660328730475	0.00665460841264576				1	PPI Pct	(ASRc - ASRp)/ASRc	73.7755
1	2	36	Null	0	0	0	0	0	0	0	0	0	0	0	0	0	2	57													1	1	1	125	1.88563557178713	0.0072997520910576
1	2	36	PrePulse	0.0402	33	32	-0.4297	1.0444	0.0103	0.0138	-0.0043	0.0144	1	20	20	86	2	57													1	1	1	126	1.88111956603825	0.00665460841264576				ASRp
1	2	37	Null	0	0	0	0	0	0	0	0	0	0	0	0	0	2	8													1	1	1	127	1.87434555741493	0.0072997520910576				Chamber	Block ID	Trial ID	Period	Decibel	AvgVal	BlockId0	TrialId0
1	2	37	PrePulse	0.0073	40	39	-0.3742	0.5175	0.0051	0.0047	-0.0037	0.0060	1	20	20	66	2	8													1	1	1	128	1.87144241086207	0.0072997520910576				1	2	1	PrePulse	74	0	2	30
1	2	38	Null	0	0	0	0	0	0	0	0	0	0	0	0	0	2	54													1	1	1	129	1.87208755454048	0.00697718025185168				1	2	1	Startle	120	-0.0040	2	30
1	2	38	PrePulse	0.0099	76	75	-0.3532	0.5919	0.0059	0.0062	-0.0035	0.0071	1	20	20	78	2	54													1	1	1	130	1.87531327293254	0.00794489576946944				1	2	2	PrePulse	74	0	2	25
1	2	39	Null	0	0	0	0	0	0	0	0	0	0	0	0	0	2	58													1	1	1	131	1.87434555741493	0.0072997520910576				1	2	2	Startle	120	-0.0052	2	25
1	2	39	PrePulse	0.0173	72	71	-0.5258	1.0508	0.0104	0.0129	-0.0052	0.0139	1	20	20	86	2	58													1	1	1	132	1.87595841661096	0.0072997520910576				1	2	3	PrePulse	74	0	2	28
1	2	40	Null	0	0	0	0	0	0	0	0	0	0	0	0	0	2	23													1	1	1	133	1.87660356028937	0.00762232393026352				1	2	3	Startle	120	-0.0045	2	28
1	2	40	PrePulse	0.0112	35	34	-0.3807	0.6756	0.0067	0.0068	-0.0038	0.0078	1	20	20	74	2	23													1	1	1	134	1.88466785626952	0.0072997520910576				1	2	7	PrePulse	74	0	2	22
1	2	40	Startle	0.0173	145	24	-0.3655	0.8853	0.0088	0.0101	-0.0036	0.0107	121	160	40	120	2	23													1	1	1	135	1.88208728155587	0.00697718025185168				1	2	7	Startle	120	-0.0033	2	22
1	2	41	Null	0	0	0	0	0	0	0	0	0	0	0	0	0	2	60													1	1	1	136	1.88337756891269	0.00697718025185168				1	2	11	PrePulse	74	0	2	27
1	2	41	PrePulse	0.0121	41	40	-0.4403	0.8370	0.0083	0.0089	-0.0044	0.0099	1	20	20	86	2	60													1	1	1	137	1.87757127580699	0.0072997520910576				1	2	11	Startle	120	-0.0019	2	27
1	2	42	Null	0	0	0	0	0	0	0	0	0	0	0	0	0	2	10													1	1	1	138	1.88273242523428	0.0072997520910576				1	2	24	PrePulse	74	0	2	24
1	2	42	PrePulse	0.0099	95	94	-0.2532	0.5185	0.0051	0.0059	-0.0025	0.0063	1	20	20	66	2	10													1	1	1	139	1.8785389913246	0.00665460841264576				1	2	24	Startle	120	-0.0042	2	24
1	2	43	Null	0	0	0	0	0	0	0	0	0	0	0	0	0	2	19													1	1	1	140	1.87886156316381	0.00633203657343984				1	2	26	PrePulse	74	0	2	29
1	2	43	Startle	0.0173	187	66	-0.3997	1.0791	0.0107	0.0143	-0.0040	0.0148	121	160	40	120	2	19													1	1	1	141	1.87499070109334	0.0072997520910576				1	2	26	Startle	120	-0.0033	2	29
1	2	44	Null	0	0	0	0	0	0	0	0	0	0	0	0	0	2	32													1	1	1	142	1.87692613212857	0.00697718025185168				1	2	28	PrePulse	74	0	2	26
1	2	44	PrePulse	0.0118	1	0	-0.3907	0.5518	0.0055	0.0057	-0.0039	0.0069	1	20	20	78	2	32													1	1	1	143	1.87757127580699	0.0072997520910576				1	2	28	Startle	120	-0.0041	2	26
1	2	44	Startle	0.0134	143	22	-0.3884	0.7562	0.0075	0.0093	-0.0038	0.0101	121	160	40	120	2	32													1	1	1	144	1.87918413500302	0.00762232393026352				1	2	40	PrePulse	74	0	2	23
1	2	45	Null	0	0	0	0	0	0	0	0	0	0	0	0	0	2	1													1	1	1	145	1.87434555741493	0.00697718025185168				1	2	40	Startle	120	-0.0036	2	23
1	2	45	PrePulse	0.0060	10	9	-0.3213	0.4085	0.0040	0.0037	-0.0032	0.0049	1	20	20	66	2	1													1	1	1	146	1.87628098845016	0.00794489576946944				1	2	59	PrePulse	74	0	2	21
1	2	46	Null	0	0	0	0	0	0	0	0	0	0	0	0	0	2	15													1	1	1	147	1.8785389913246	0.00762232393026352				1	2	59	Startle	120	-0.0016	2	21
1	2	46	Startle	0.0796	142	21	-0.4145	1.8629	0.0184	0.0257	-0.0041	0.0259	121	160	40	120	2	15													1	1	1	148	1.87982927868143	0.0072997520910576
1	2	47	Null	0	0	0	0	0	0	0	0	0	0	0	0	0	2	46													1	1	1	149	1.8782164194854	0.00794489576946944				ASRc
1	2	47	PrePulse	0.0779	23	22	-0.3294	1.8655	0.0185	0.0269	-0.0033	0.0269	1	20	20	86	2	46													1	1	1	150	1.87982927868143	0.0072997520910576				Chamber	Block ID	Trial ID	Period	Decibel	AvgVal	BlockId0	TrialId0
1	2	47	Startle	0.0515	160	39	-0.1474	1.5188	0.0150	0.0225	-0.0015	0.0224	121	160	40	120	2	46													1	1	1	151	1.88240985339507	0.0072997520910576				1	2	4	Startle	120	-0.0035	2	17
1	2	48	Null	0	0	0	0	0	0	0	0	0	0	0	0	0	2	48													1	1	1	152	1.8895064338576	0.00697718025185168				1	2	9	Startle	120	-0.0034	2	14
1	2	48	PrePulse	0.0189	52	51	-0.2752	0.7774	0.0077	0.0100	-0.0027	0.0103	1	20	20	86	2	48													1	1	1	153	1.88821614650078	0.00697718025185168				1	2	12	Startle	120	-0.0039	2	11
1	2	48	Startle	0.0131	179	58	-0.3571	0.6287	0.0062	0.0066	-0.0035	0.0075	121	160	40	120	2	48													1	1	1	154	1.8891838620184	0.00697718025185168				1	2	18	Startle	120	-0.0027	2	13
1	2	49	Null	0	0	0	0	0	0	0	0	0	0	0	0	0	2	53													1	1	1	155	1.88628071546555	0.0072997520910576				1	2	25	Startle	120	-0.0074	2	18
1	2	49	PrePulse	0.0079	12	11	-0.3736	0.4739	0.0047	0.0049	-0.0037	0.0061	1	20	20	74	2	53													1	1	1	156	1.89208700857125	0.00633203657343984				1	2	43	Startle	120	-0.0040	2	19
1	2	50	Null	0	0	0	0	0	0	0	0	0	0	0	0	0	2	12													1	1	1	157	1.88660328730475	0.00762232393026352				1	2	46	Startle	120	-0.0041	2	15
1	2	50	Startle	0.0815	143	22	-0.4145	2.3804	0.0236	0.0339	-0.0041	0.0340	121	160	40	120	2	12													1	1	1	158	1.88499042810872	0.00665460841264576				1	2	50	Startle	120	-0.0041	2	12
1	2	51	Null	0	0	0	0	0	0	0	0	0	0	0	0	0	2	20													1	1	1	159	1.8785389913246	0.0072997520910576				1	2	51	Startle	120	-0.0026	2	20
1	2	51	Startle	0.1076	142	21	-0.2652	2.5274	0.0250	0.0351	-0.0026	0.0350	121	160	40	120	2	20													1	1	1	160	1.88337756891269	0.00762232393026352				1	2	53	Startle	120	-0.0028	2	16
1	2	52	Null	0	0	0	0	0	0	0	0	0	0	0	0	0	2	55													1	1	1	161	1.87757127580699	0.00665460841264576
1	2	52	PrePulse	0.0079	56	55	-0.3897	0.4387	0.0043	0.0035	-0.0039	0.0052	1	20	20	78	2	55													1	1	1	162	1.8782164194854	0.00697718025185168				PPI Pct
1	2	53	Null	0	0	0	0	0	0	0	0	0	0	0	0	0	2	16													1	1	1	163	1.87176498270128	0.00697718025185168				Chamber	Type	Details	Result
1	2	53	Startle	0.2847	141	20	-0.2848	5.9760	0.0592	0.0905	-0.0028	0.0901	121	160	40	120	2	16													1	1	1	164	1.87692613212857	0.00665460841264576				1	ASRp	((-0.0040 +-0.0052 +-0.0045 +-0.0033 +-0.0019 +-0.0042 +-0.0033 +-0.0041 +-0.0036 +-0.0016)/10)*100	-0.3570
1	2	54	Null	0	0	0	0	0	0	0	0	0	0	0	0	0	2	3													1	1	1	165	1.87757127580699	0.00762232393026352				1	ASRc	((-0.0035 +-0.0034 +-0.0039 +-0.0027 +-0.0074 +-0.0040 +-0.0041 +-0.0041 +-0.0026 +-0.0028)/10)*100	-0.3850
1	2	54	PrePulse	0.0144	80	79	-0.4381	0.7098	0.0070	0.0082	-0.0043	0.0093	1	20	20	66	2	3													1	1	1	166	1.8785389913246	0.00762232393026352				1	PPI Pct	(ASRc - ASRp)/ASRc	7.2727
1	2	55	Null	0	0	0	0	0	0	0	0	0	0	0	0	0	2	37													1	1	1	167	1.87789384764619	0.00697718025185168
1	2	55	PrePulse	0.0160	44	43	-0.3048	0.8223	0.0081	0.0093	-0.0030	0.0097	1	20	20	78	2	37													1	1	1	168	1.87982927868143	0.00697718025185168				ASRp
1	2	55	Startle	0.0670	142	21	-0.4132	1.6471	0.0163	0.0216	-0.0041	0.0219	121	160	40	120	2	37													1	1	1	169	1.88240985339507	0.0072997520910576				Chamber	Block ID	Trial ID	Period	Decibel	AvgVal	BlockId0	TrialId0
1	2	56	Null	0	0	0	0	0	0	0	0	0	0	0	0	0	2	45													1	1	1	170	1.88434528443031	0.0072997520910576				1	2	5	PrePulse	78	0	2	34
1	2	56	PrePulse	0.0112	25	24	-0.2945	0.6248	0.0062	0.0070	-0.0029	0.0075	1	20	20	86	2	45													1	1	1	171	1.87982927868143	0.00697718025185168				1	2	5	Startle	120	-0.0031	2	34
1	2	56	Startle	0.0447	142	21	-0.4110	1.0619	0.0105	0.0129	-0.0041	0.0134	121	160	40	120	2	45													1	1	1	172	1.87918413500302	0.00762232393026352				1	2	6	PrePulse	78	0	2	35
1	2	57	Null	0	0	0	0	0	0	0	0	0	0	0	0	0	2	50													1	1	1	173	1.8782164194854	0.00697718025185168				1	2	6	Startle	120	-0.0035	2	35
1	2	57	PrePulse	0.0389	24	23	-0.5306	1.4005	0.0139	0.0162	-0.0053	0.0169	1	20	20	86	2	50													1	1	1	174	1.88015185052063	0.00504174921661615				1	2	16	PrePulse	78	0	2	31
1	2	57	Startle	0.0176	161	40	-0.3378	0.7349	0.0073	0.0089	-0.0033	0.0095	121	160	40	120	2	50													1	1	1	175	1.87757127580699	0.00633203657343984				1	2	16	Startle	120	-0.0035	2	31
1	2	58	Null	0	0	0	0	0	0	0	0	0	0	0	0	0	2	51													1	1	1	176	1.87757127580699	0.0072997520910576				1	2	19	PrePulse	78	0	2	40
1	2	58	PrePulse	0.0067	14	13	-0.3058	0.3948	0.0039	0.0035	-0.0030	0.0046	1	20	20	74	2	51													1	1	1	177	1.87499070109334	0.0072997520910576				1	2	19	Startle	120	-0.0041	2	40
1	2	59	Null	0	0	0	0	0	0	0	0	0	0	0	0	0	2	21													1	1	1	178	1.88047442235984	0.00762232393026352				1	2	20	PrePulse	78	0	2	33
1	2	59	PrePulse	0.0076	64	63	-0.3407	0.6021	0.0060	0.0062	-0.0034	0.0070	1	20	20	74	2	21													1	1	1	179	1.87660356028937	0.00762232393026352				1	2	20	Startle	120	-0.0019	2	33
1	2	59	Startle	0.0092	205	84	-0.1665	0.4531	0.0045	0.0054	-0.0016	0.0056	121	160	40	120	2	21													1	1	1	180	1.87918413500302	0.0072997520910576				1	2	29	PrePulse	78	0	2	36
1	2	60	Null	0	0	0	0	0	0	0	0	0	0	0	0	0	2	56													1	1	1	181	1.87402298557572	0.00826746760867536				1	2	29	Startle	120	-0.0048	2	36
1	2	60	PrePulse	0.0115	2	1	-0.3165	0.5166	0.0051	0.0054	-0.0031	0.0062	1	20	20	78	2	56													1	1	1	182	1.87950670684222	0.00697718025185168				1	2	30	PrePulse	78	0	2	38
1	3	1	Null	0	0	0	0	0	0	0	0	0	0	0	0	0	3	1													1	1	1	183	1.8785389913246	0.00600946473423392				1	2	30	Startle	120	-0.0047	2	38
1	3	1	Startle	0.0325	177	56	-0.8035	1.5186	0.0150	0.0176	-0.0080	0.0192	121	160	40	120	3	1													1	1	1	184	1.88015185052063	0.0072997520910576				1	2	33	PrePulse	78	0	2	39
1	3	2	Null	0	0	0	0	0	0	0	0	0	0	0	0	0	3	2													1	1	1	185	1.8782164194854	0.0072997520910576				1	2	33	Startle	120	-0.0042	2	39
1	3	2	Startle	0.0918	143	22	-0.4471	1.9345	0.0192	0.0266	-0.0044	0.0269	121	160	40	120	3	2													1	1	1	186	1.88240985339507	0.00665460841264576				1	2	44	PrePulse	78	0	2	32
1	3	3	Null	0	0	0	0	0	0	0	0	0	0	0	0	0	3	3													1	1	1	187	1.8840227125911	0.00697718025185168				1	2	44	Startle	120	-0.0038	2	32
1	3	3	Startle	0.0786	141	20	-0.4029	2.1067	0.0209	0.0288	-0.0040	0.0290	121	160	40	120	3	3													1	1	1	188	1.88563557178713	0.0072997520910576				1	2	55	PrePulse	78	0	2	37
1	3	4	Null	0	0	0	0	0	0	0	0	0	0	0	0	0	3	4													1	1	1	189	1.88337756891269	0.00697718025185168				1	2	55	Startle	120	-0.0041	2	37
1	3	4	Startle	0.0654	142	21	-0.4658	1.8333	0.0182	0.0248	-0.0046	0.0251	121	160	40	120	3	4													1	1	1	190	1.88337756891269	0.00600946473423392
1	3	5	Null	0	0	0	0	0	0	0	0	0	0	0	0	0	3	5													1	1	1	191	1.88595814362634	0.00697718025185168				ASRc
1	3	5	Startle	0.0218	175	54	-0.3761	0.9305	0.0092	0.0121	-0.0037	0.0126	121	160	40	120	3	5													1	1	1	192	1.88531299994793	0.00697718025185168				Chamber	Block ID	Trial ID	Period	Decibel	AvgVal	BlockId0	TrialId0
1	3	6	Null	0	0	0	0	0	0	0	0	0	0	0	0	0	3	6													1	1	1	193	1.88176470971666	0.00633203657343984				1	2	4	Startle	120	-0.0035	2	17
1	3	6	Startle	0.1157	141	20	-0.3284	4.0071	0.0397	0.0492	-0.0033	0.0491	121	160	40	120	3	6													1	1	1	194	1.88015185052063	0.0072997520910576				1	2	9	Startle	120	-0.0034	2	14
1	3	7	Null	0	0	0	0	0	0	0	0	0	0	0	0	0	3	7													1	1	1	195	1.88079699419904	0.0072997520910576				1	2	12	Startle	120	-0.0039	2	11
1	3	7	Startle	0.0460	140	19	-0.3797	1.4952	0.0148	0.0219	-0.0038	0.0221	121	160	40	120	3	7													1	1	1	196	1.88305499707349	0.00762232393026352				1	2	18	Startle	120	-0.0027	2	13
1	3	8	Null	0	0	0	0	0	0	0	0	0	0	0	0	0	3	8													1	1	1	197	1.87950670684222	0.00826746760867536				1	2	25	Startle	120	-0.0074	2	18
1	3	8	Startle	0.0289	176	55	-0.4965	1.3781	0.0136	0.0163	-0.0049	0.0170	121	160	40	120	3	8													1	1	1	198	1.87918413500302	0.0072997520910576				1	2	43	Startle	120	-0.0040	2	19
1	3	9	Null	0	0	0	0	0	0	0	0	0	0	0	0	0	3	9													1	1	1	199	1.87692613212857	0.0072997520910576				1	2	46	Startle	120	-0.0041	2	15
1	3	9	Startle	0.0218	207	86	-0.4452	0.8432	0.0083	0.0094	-0.0044	0.0104	121	160	40	120	3	9													1	1	1	200	1.8840227125911	0.0072997520910576				1	2	50	Startle	120	-0.0041	2	12
1	3	10	Null	0	0	0	0	0	0	0	0	0	0	0	0	0	3	10													1	1	1	201	1.88111956603825	0.0072997520910576				1	2	51	Startle	120	-0.0026	2	20
1	3	10	Startle	0.0576	142	21	-0.4419	1.3108	0.0130	0.0184	-0.0044	0.0189	121	160	40	120	3	10													1	1	1	202	1.88305499707349	0.00762232393026352				1	2	53	Startle	120	-0.0028	2	16
																															1	1	1	203	1.88047442235984	0.0072997520910576
Chamber ID	DataType	Decibel	ASRp(%)	ASRc(%)	PPI Pct(%)																										1	1	1	204	1.88660328730475	0.00697718025185168				PPI Pct
1	PeakVal	74	10.3310	12.1070	14.6692																										1	1	1	205	1.88337756891269	0.00697718025185168				Chamber	Type	Details	Result
1	PeakVal	78	6.5340	12.1070	46.0312																										1	1	1	206	1.88595814362634	0.00762232393026352				1	ASRp	((-0.0031 +-0.0035 +-0.0035 +-0.0041 +-0.0019 +-0.0048 +-0.0047 +-0.0042 +-0.0038 +-0.0041)/10)*100	-0.3770
1	PeakVal	86	3.1750	12.1070	73.7755																										1	1	1	207	1.88079699419904	0.00762232393026352				1	ASRc	((-0.0035 +-0.0034 +-0.0039 +-0.0027 +-0.0074 +-0.0040 +-0.0041 +-0.0041 +-0.0026 +-0.0028)/10)*100	-0.3850
																															1	1	1	208	1.88176470971666	0.0072997520910576				1	PPI Pct	(ASRc - ASRp)/ASRc	2.0779
Chamber ID	DataType	Decibel	ASRp(%)	ASRc(%)	PPI Pct(%)																										1	1	1	209	1.8837001407519	0.00697718025185168
1	AvgVal	74	-0.3570	-0.3850	7.2727																										1	1	1	210	1.88240985339507	0.00697718025185168				ASRp
1	AvgVal	78	-0.3770	-0.3850	2.0779																										1	1	1	211	1.87918413500302	0.00794489576946944				Chamber	Block ID	Trial ID	Period	Decibel	AvgVal	BlockId0	TrialId0
1	AvgVal	86	-0.3230	-0.3850	16.1039																										1	1	1	212	1.8782164194854	0.00697718025185168				1	2	13	PrePulse	86	0	2	43
																															1	1	1	213	1.87950670684222	0.0072997520910576				1	2	13	Startle	120	-0.0041	2	43
Chamber ID	DataType	Decibel	ASRp(%)	ASRc(%)	PPI Pct(%)																										1	1	1	214	1.88208728155587	0.00697718025185168				1	2	17	PrePulse	86	0	2	41
1	RmsVal	74	3.5570	4.2480	16.2665																										1	1	1	215	1.8785389913246	0.0072997520910576				1	2	17	Startle	120	-0.0032	2	41
1	RmsVal	78	2.3890	4.2480	43.7618																										1	1	1	216	1.88240985339507	0.00762232393026352				1	2	21	PrePulse	86	0	2	49
1	RmsVal	86	1.3260	4.2480	68.7853																										1	1	1	217	1.88015185052063	0.00697718025185168				1	2	21	Startle	120	-0.0038	2	49
																															1	1	1	218	1.88757100282237	0.0072997520910576				1	2	23	PrePulse	86	0	2	44
Chamber ID	DataType	Decibel	ASRp(%)	ASRc(%)	PPI Pct(%)																										1	1	1	219	1.8840227125911	0.0072997520910576				1	2	23	Startle	120	-0.0033	2	44
1	StdevVal	74	3.5440	4.2360	16.3362																										1	1	1	220	1.88595814362634	0.00762232393026352				1	2	31	PrePulse	86	0	2	42
1	StdevVal	78	2.3590	4.2360	44.3107																										1	1	1	221	1.87982927868143	0.00697718025185168				1	2	31	Startle	120	-0.0028	2	42
1	StdevVal	86	1.2800	4.2360	69.7828																										1	1	1	222	1.88660328730475	0.0072997520910576				1	2	32	PrePulse	86	0	2	47
																															1	1	1	223	1.88208728155587	0.00794489576946944				1	2	32	Startle	120	-0.0027	2	47
Chamber ID	Block ID	Trial ID	Period	Peak Value	Peak Time	Latency	Total Value	TotalAbsolute Value	AvgAbsolute Value	ARS Stdev	Avg Value	Rms Value	Start	End	PeriodCnt	Db	BlockId0	TrialId0													1	1	1	224	1.8840227125911	0.00762232393026352				1	2	47	PrePulse	86	0	2	46
2	1	1	Null	0	0	0	0	0	0	0	0	0	0	0	0	0	1	1													1	1	1	225	1.8782164194854	0.0072997520910576				1	2	47	Startle	120	-0.0015	2	46
2	1	1	Startle	0.3797	23	22	0.3576	13.2714	0.1314	0.1804	0.0035	0.1796	1	40	40	120	1	1													1	1	1	226	1.87982927868143	0.00794489576946944				1	2	48	PrePulse	86	0	2	48
2	1	2	Null	0	0	0	0	0	0	0	0	0	0	0	0	0	1	2													1	1	1	227	1.88047442235984	0.00697718025185168				1	2	48	Startle	120	-0.0035	2	48
2	1	2	Startle	0.7104	22	21	-0.5346	23.8003	0.2356	0.3807	-0.0053	0.3788	1	40	40	120	1	2													1	1	1	228	1.88273242523428	0.00762232393026352				1	2	56	PrePulse	86	0	2	45
2	1	3	Null	0	0	0	0	0	0	0	0	0	0	0	0	0	1	3													1	1	1	229	1.8782164194854	0.0072997520910576				1	2	56	Startle	120	-0.0041	2	45
2	1	3	Startle	0.6446	23	22	0.4280	21.8956	0.2168	0.2990	0.0042	0.2975	1	40	40	120	1	3													1	1	1	230	1.87918413500302	0.00762232393026352				1	2	57	PrePulse	86	0	2	50
2	1	4	Null	0	0	0	0	0	0	0	0	0	0	0	0	0	1	4													1	1	1	231	1.87531327293254	0.0072997520910576				1	2	57	Startle	120	-0.0033	2	50
2	1	4	Startle	0.7533	22	21	-0.3704	23.4483	0.2322	0.3388	-0.0037	0.3371	1	40	40	120	1	4													1	1	1	232	1.8837001407519	0.00762232393026352
2	1	5	Null	0	0	0	0	0	0	0	0	0	0	0	0	0	1	5													1	1	1	233	1.87724870396778	0.0072997520910576				ASRc
2	1	5	Startle	0.7768	23	22	0.0147	20.6103	0.2041	0.3034	0.0001	0.3019	1	40	40	120	1	5													1	1	1	234	1.88079699419904	0.00697718025185168				Chamber	Block ID	Trial ID	Period	Decibel	AvgVal	BlockId0	TrialId0
2	1	6	Null	0	0	0	0	0	0	0	0	0	0	0	0	0	1	6													1	1	1	235	1.87660356028937	0.00923518312629312				1	2	4	Startle	120	-0.0035	2	17
2	1	6	Startle	0.5749	23	22	-0.1285	15.7029	0.1555	0.2312	-0.0013	0.2301	1	40	40	120	1	6													1	1	1	236	1.88531299994793	0.0089126112870872				1	2	9	Startle	120	-0.0034	2	14
2	1	7	Null	0	0	0	0	0	0	0	0	0	0	0	0	0	1	7													1	1	1	237	1.88144213787746	0.00665460841264576				1	2	12	Startle	120	-0.0039	2	11
2	1	7	Startle	0.6407	22	21	-0.5665	18.5217	0.1834	0.2758	-0.0056	0.2745	1	40	40	120	1	7													1	1	1	238	1.88563557178713	0.0072997520910576				1	2	18	Startle	120	-0.0027	2	13
2	1	8	Null	0	0	0	0	0	0	0	0	0	0	0	0	0	1	8													1	1	1	239	1.88176470971666	0.00697718025185168				1	2	25	Startle	120	-0.0074	2	18
2	1	8	Startle	0.5394	23	22	-0.2911	15.3802	0.1523	0.2235	-0.0029	0.2224	1	40	40	120	1	8													1	1	1	240	1.88789357466158	0.0072997520910576				1	2	43	Startle	120	-0.0040	2	19
2	1	9	Null	0	0	0	0	0	0	0	0	0	0	0	0	0	1	9													1	1	1	241	1.88628071546555	0.00697718025185168				1	2	46	Startle	120	-0.0041	2	15
2	1	9	Startle	0.0384	21	20	-0.6752	2.0389	0.0202	0.0296	-0.0067	0.0302	1	40	40	120	1	9													1	1	1	242	1.88982900569681	0.0072997520910576				1	2	50	Startle	120	-0.0041	2	12
2	1	10	Null	0	0	0	0	0	0	0	0	0	0	0	0	0	1	10													1	1	1	243	1.88273242523428	0.00697718025185168				1	2	51	Startle	120	-0.0026	2	20
2	1	10	Startle	0.5488	23	22	0.0386	14.7166	0.1457	0.2146	0.0004	0.2136	1	40	40	120	1	10													1	1	1	244	1.88208728155587	0.0072997520910576				1	2	53	Startle	120	-0.0028	2	16
2	2	1	Null	0	0	0	0	0	0	0	0	0	0	0	0	0	2	30													1	1	1	245	1.88240985339507	0.00697718025185168
2	2	1	PrePulse	0.0126	31	30	-0.3701	0.6088	0.0060	0.0066	-0.0037	0.0075	1	20	20	74	2	30													1	1	1	246	1.88434528443031	0.00794489576946944				PPI Pct
2	2	1	Startle	0.2175	144	23	-0.0111	4.6897	0.0464	0.0745	-0.0001	0.0742	121	160	40	120	2	30													1	1	1	247	1.8782164194854	0.00697718025185168				Chamber	Type	Details	Result
2	2	2	Null	0	0	0	0	0	0	0	0	0	0	0	0	0	2	25													1	1	1	248	1.87982927868143	0.00762232393026352				1	ASRp	((-0.0041 +-0.0032 +-0.0038 +-0.0033 +-0.0028 +-0.0027 +-0.0015 +-0.0035 +-0.0041 +-0.0033)/10)*100	-0.3230
2	2	2	PrePulse	0.0175	33	32	-0.3381	0.7092	0.0070	0.0081	-0.0033	0.0087	1	20	20	74	2	25													1	1	1	249	1.87595841661096	0.00762232393026352				1	ASRc	((-0.0035 +-0.0034 +-0.0039 +-0.0027 +-0.0074 +-0.0040 +-0.0041 +-0.0041 +-0.0026 +-0.0028)/10)*100	-0.3850
2	2	2	Startle	0.1401	144	23	-0.3843	3.7442	0.0371	0.0522	-0.0038	0.0521	121	160	40	120	2	25													1	1	1	250	1.88434528443031	0.0072997520910576				1	PPI Pct	(ASRc - ASRp)/ASRc	16.1039
2	2	3	Null	0	0	0	0	0	0	0	0	0	0	0	0	0	2	28													1	1	1	251	1.88079699419904	0.00697718025185168
2	2	3	PrePulse	0.0107	43	42	-0.3727	0.5827	0.0058	0.0060	-0.0037	0.0071	1	20	20	74	2	28													1	1	1	252	1.88337756891269	0.00697718025185168				ASRp
2	2	3	Startle	0.2130	143	22	-0.3023	5.8927	0.0583	0.0906	-0.0030	0.0902	121	160	40	120	2	28													1	1	1	253	1.88111956603825	0.0072997520910576				Chamber	Block ID	Trial ID	Period	Decibel	RmsVal	BlockId0	TrialId0
2	2	4	Null	0	0	0	0	0	0	0	0	0	0	0	0	0	2	17													1	1	1	254	1.8891838620184	0.00697718025185168				1	2	1	PrePulse	74	0	2	30
2	2	4	Startle	0.2852	142	21	0.1383	9.1497	0.0906	0.1258	0.0014	0.1252	121	160	40	120	2	17													1	1	1	255	1.88628071546555	0.0072997520910576				1	2	1	Startle	120	0.0379	2	30
2	2	5	Null	0	0	0	0	0	0	0	0	0	0	0	0	0	2	34													1	1	1	256	1.88821614650078	0.00697718025185168				1	2	2	PrePulse	74	0	2	25
2	2	5	PrePulse	0.0075	34	33	-0.3207	0.4232	0.0042	0.0041	-0.0032	0.0052	1	20	20	78	2	34													1	1	1	257	1.8837001407519	0.00697718025185168				1	2	2	Startle	120	0.0544	2	25
2	2	5	Startle	0.0894	144	23	-0.7494	2.9117	0.0288	0.0395	-0.0074	0.0400	121	160	40	120	2	34													1	1	1	258	1.88886129017919	0.00665460841264576				1	2	3	PrePulse	74	0	2	28
2	2	6	Null	0	0	0	0	0	0	0	0	0	0	0	0	0	2	35													1	1	1	259	1.88853871833999	0.0072997520910576				1	2	3	Startle	120	0.0423	2	28
2	2	6	PrePulse	0.0117	99	98	-0.3246	0.5374	0.0053	0.0057	-0.0032	0.0065	1	20	20	78	2	35													1	1	1	260	1.8895064338576	0.0072997520910576				1	2	7	PrePulse	74	0	2	22
2	2	6	Startle	0.1859	144	23	-0.6549	5.1479	0.0510	0.0750	-0.0065	0.0749	121	160	40	120	2	35													1	1	1	261	1.88660328730475	0.00794489576946944				1	2	7	Startle	120	0.0194	2	22
2	2	7	Null	0	0	0	0	0	0	0	0	0	0	0	0	0	2	22													1	1	1	262	1.88563557178713	0.00826746760867536				1	2	11	PrePulse	74	0	2	27
2	2	7	PrePulse	0.0143	33	32	-0.3114	0.5814	0.0058	0.0067	-0.0031	0.0074	1	20	20	74	2	22													1	1	1	263	1.88724843098316	0.00697718025185168				1	2	11	Startle	120	0.0587	2	27
2	2	7	Startle	0.1094	143	22	-0.4333	2.4765	0.0245	0.0390	-0.0043	0.0390	121	160	40	120	2	22													1	1	1	264	1.88595814362634	0.00794489576946944				1	2	24	PrePulse	74	0	2	24
2	2	8	Null	0	0	0	0	0	0	0	0	0	0	0	0	0	2	5													1	1	1	265	1.88176470971666	0.0072997520910576				1	2	24	Startle	120	0.0699	2	24
2	2	8	PrePulse	0.0097	31	30	-0.3281	0.5306	0.0053	0.0061	-0.0032	0.0069	1	20	20	66	2	5													1	1	1	266	1.88015185052063	0.00697718025185168				1	2	26	PrePulse	74	0	2	29
2	2	9	Null	0	0	0	0	0	0	0	0	0	0	0	0	0	2	14													1	1	1	267	1.87950670684222	0.0072997520910576				1	2	26	Startle	120	0.0085	2	29
2	2	9	Startle	0.3868	144	23	0.2138	9.2125	0.0912	0.1401	0.0021	0.1395	121	160	40	120	2	14													1	1	1	268	1.88144213787746	0.00697718025185168				1	2	28	PrePulse	74	0	2	26
2	2	10	Null	0	0	0	0	0	0	0	0	0	0	0	0	0	2	52													1	1	1	269	1.87660356028937	0.0072997520910576				1	2	28	Startle	120	0.0483	2	26
2	2	10	PrePulse	0.0091	56	55	-0.3449	0.5279	0.0052	0.0053	-0.0034	0.0062	1	20	20	74	2	52													1	1	1	270	1.87595841661096	0.00762232393026352				1	2	40	PrePulse	74	0	2	23
2	2	11	Null	0	0	0	0	0	0	0	0	0	0	0	0	0	2	27													1	1	1	271	1.87402298557572	0.0072997520910576				1	2	40	Startle	120	0.0107	2	23
2	2	11	PrePulse	0.0123	41	40	-0.2846	0.4764	0.0047	0.0049	-0.0028	0.0057	1	20	20	74	2	27													1	1	1	272	1.88047442235984	0.00762232393026352				1	2	59	PrePulse	74	0	2	21
2	2	11	Startle	0.1226	143	22	-0.0007	3.4263	0.0339	0.0461	0.0000	0.0459	121	160	40	120	2	27													1	1	1	273	1.87789384764619	0.0072997520910576				1	2	59	Startle	120	0.0056	2	21
2	2	12	Null	0	0	0	0	0	0	0	0	0	0	0	0	0	2	11													1	1	1	274	1.88047442235984	0.0072997520910576
2	2	12	Startle	0.3517	143	22	-0.5552	9.2653	0.0917	0.1372	-0.0055	0.1366	121	160	40	120	2	11													1	1	1	275	1.87595841661096	0.0072997520910576				ASRc
2	2	13	Null	0	0	0	0	0	0	0	0	0	0	0	0	0	2	43													1	1	1	276	1.88273242523428	0.0072997520910576				Chamber	Block ID	Trial ID	Period	Decibel	RmsVal	BlockId0	TrialId0
2	2	13	PrePulse	0.0997	25	24	-0.2481	2.6199	0.0259	0.0379	-0.0025	0.0378	1	20	20	86	2	43													1	1	1	277	1.88015185052063	0.00762232393026352				1	2	4	Startle	120	0.0136	2	17
2	2	13	Startle	0.0088	145	24	-0.7114	0.9075	0.0090	0.0092	-0.0070	0.0115	121	160	40	120	2	43													1	1	1	278	1.88144213787746	0.00762232393026352				1	2	9	Startle	120	0.0716	2	14
2	2	14	Null	0	0	0	0	0	0	0	0	0	0	0	0	0	2	2													1	1	1	279	1.87724870396778	0.00923518312629312				1	2	12	Startle	120	0.0609	2	11
2	2	14	PrePulse	0.0049	38	37	-0.4146	0.4489	0.0044	0.0028	-0.0041	0.0050	1	20	20	66	2	2													1	1	1	280	1.88111956603825	0.00665460841264576				1	2	18	Startle	120	0.0578	2	13
2	2	15	Null	0	0	0	0	0	0	0	0	0	0	0	0	0	2	6													1	1	1	281	1.88273242523428	0.00762232393026352				1	2	25	Startle	120	0.0211	2	18
2	2	15	PrePulse	0.0075	32	31	-0.4033	0.4829	0.0048	0.0045	-0.0040	0.0060	1	20	20	66	2	6													1	1	1	282	1.88305499707349	0.00665460841264576				1	2	43	Startle	120	0.0148	2	19
2	2	16	Null	0	0	0	0	0	0	0	0	0	0	0	0	0	2	31													1	1	1	283	1.87918413500302	0.00794489576946944				1	2	46	Startle	120	0.0259	2	15
2	2	16	PrePulse	0.0117	29	28	-0.4733	0.5861	0.0058	0.0053	-0.0047	0.0071	1	20	20	78	2	31													1	1	1	284	1.87982927868143	0.0072997520910576				1	2	50	Startle	120	0.0340	2	12
2	2	16	Startle	0.2504	143	22	-0.1056	6.4547	0.0639	0.1056	-0.0010	0.1051	121	160	40	120	2	31													1	1	1	285	1.88079699419904	0.00665460841264576				1	2	51	Startle	120	0.0350	2	20
2	2	17	Null	0	0	0	0	0	0	0	0	0	0	0	0	0	2	41													1	1	1	286	1.88144213787746	0.0072997520910576				1	2	53	Startle	120	0.0901	2	16
2	2	17	PrePulse	0.1907	25	24	-0.6507	5.3879	0.0533	0.0782	-0.0064	0.0780	1	20	20	86	2	41													1	1	1	287	1.87789384764619	0.0072997520910576
2	2	17	Startle	0.0310	153	32	-0.7368	1.4352	0.0142	0.0155	-0.0073	0.0170	121	160	40	120	2	41													1	1	1	288	1.87692613212857	0.0072997520910576				PPI Pct
2	2	18	Null	0	0	0	0	0	0	0	0	0	0	0	0	0	2	13													1	1	1	289	1.87660356028937	0.00697718025185168				Chamber	Type	Details	Result
2	2	18	Startle	0.5039	143	22	0.0038	12.8329	0.1271	0.1997	0.0000	0.1987	121	160	40	120	2	13													1	1	1	290	1.88015185052063	0.00697718025185168				1	ASRp	((0.0379 +0.0544 +0.0423 +0.0194 +0.0587 +0.0699 +0.0085 +0.0483 +0.0107 +0.0056)/10)*100	3.5570
2	2	19	Null	0	0	0	0	0	0	0	0	0	0	0	0	0	2	40													1	1	1	291	1.87595841661096	0.0072997520910576				1	ASRc	((0.0136 +0.0716 +0.0609 +0.0578 +0.0211 +0.0148 +0.0259 +0.0340 +0.0350 +0.0901)/10)*100	4.2480
2	2	19	PrePulse	0.0117	35	34	-0.3794	0.6312	0.0062	0.0065	-0.0038	0.0075	1	20	20	78	2	40													1	1	1	292	1.87789384764619	0.0072997520910576				1	PPI Pct	(ASRc - ASRp)/ASRc	16.2665
2	2	19	Startle	0.1342	143	22	-0.1114	3.0978	0.0307	0.0443	-0.0011	0.0441	121	160	40	120	2	40													1	1	1	293	1.87466812925413	0.0072997520910576
2	2	20	Null	0	0	0	0	0	0	0	0	0	0	0	0	0	2	33													1	1	1	294	1.88273242523428	0.0072997520910576				ASRp
2	2	20	PrePulse	0.0139	66	65	-0.3265	0.6847	0.0068	0.0078	-0.0032	0.0084	1	20	20	78	2	33													1	1	1	295	1.87886156316381	0.00665460841264576				Chamber	Block ID	Trial ID	Period	Decibel	RmsVal	BlockId0	TrialId0
2	2	20	Startle	0.2091	143	22	-0.5049	5.1252	0.0507	0.0788	-0.0050	0.0786	121	160	40	120	2	33													1	1	1	296	1.88176470971666	0.0072997520910576				1	2	5	PrePulse	78	0	2	34
2	2	21	Null	0	0	0	0	0	0	0	0	0	0	0	0	0	2	49													1	1	1	297	1.87789384764619	0.00633203657343984				1	2	5	Startle	120	0.0079	2	34
2	2	21	PrePulse	0.3781	24	23	-0.3330	9.2993	0.0921	0.1482	-0.0033	0.1475	1	20	20	86	2	49													1	1	1	298	1.88563557178713	0.0072997520910576				1	2	6	PrePulse	78	0	2	35
2	2	21	Startle	0.0404	164	43	-1.0162	1.7774	0.0176	0.0215	-0.0101	0.0236	121	160	40	120	2	49													1	1	1	299	1.88208728155587	0.00826746760867536				1	2	6	Startle	120	0.0224	2	35
2	2	22	Null	0	0	0	0	0	0	0	0	0	0	0	0	0	2	9													1	1	1	300	1.88563557178713	0.00859003944788128				1	2	16	PrePulse	78	0	2	31
2	2	22	PrePulse	0.0123	46	45	-0.4075	0.6375	0.0063	0.0072	-0.0040	0.0082	1	20	20	66	2	9													1	1	1	301	1.87886156316381	0.0072997520910576				1	2	16	Startle	120	0.0370	2	31
2	2	23	Null	0	0	0	0	0	0	0	0	0	0	0	0	0	2	44													1	1	1	302	1.88531299994793	0.00762232393026352				1	2	19	PrePulse	78	0	2	40
2	2	23	PrePulse	0.4594	24	23	-0.2904	12.6478	0.1252	0.2065	-0.0029	0.2055	1	20	20	86	2	44													1	1	1	303	1.88208728155587	0.0072997520910576				1	2	19	Startle	120	0.0444	2	40
2	2	23	Startle	0.0349	163	42	-0.2678	1.4020	0.0139	0.0164	-0.0027	0.0165	121	160	40	120	2	44													1	1	1	304	1.88660328730475	0.00762232393026352				1	2	20	PrePulse	78	0	2	33
2	2	24	Null	0	0	0	0	0	0	0	0	0	0	0	0	0	2	24													1	1	1	305	1.87982927868143	0.00697718025185168				1	2	20	Startle	120	0.0160	2	33
2	2	24	PrePulse	0.0046	44	43	-0.3572	0.4051	0.0040	0.0034	-0.0035	0.0049	1	20	20	74	2	24													1	1	1	306	1.8837001407519	0.0072997520910576				1	2	29	PrePulse	78	0	2	36
2	2	24	Startle	0.2859	142	21	0.0483	8.7041	0.0862	0.1272	0.0005	0.1266	121	160	40	120	2	24													1	1	1	307	1.88273242523428	0.00697718025185168				1	2	29	Startle	120	0.0317	2	36
2	2	25	Null	0	0	0	0	0	0	0	0	0	0	0	0	0	2	18													1	1	1	308	1.88724843098316	0.0072997520910576				1	2	30	PrePulse	78	0	2	38
2	2	25	Startle	0.2833	140	19	-1.1081	8.3908	0.0831	0.1368	-0.0110	0.1366	121	160	40	120	2	18													1	1	1	309	1.87950670684222	0.0072997520910576				1	2	30	Startle	120	0.0153	2	38
2	2	26	Null	0	0	0	0	0	0	0	0	0	0	0	0	0	2	29													1	1	1	310	1.8837001407519	0.00762232393026352				1	2	33	PrePulse	78	0	2	39
2	2	26	PrePulse	0.0104	32	31	-0.3675	0.6366	0.0063	0.0067	-0.0036	0.0076	1	20	20	74	2	29													1	1	1	311	1.88111956603825	0.00697718025185168				1	2	33	Startle	120	0.0322	2	39
2	2	26	Startle	0.1020	173	52	-0.2988	3.0974	0.0307	0.0409	-0.0030	0.0408	121	160	40	120	2	29													1	1	1	312	1.88886129017919	0.00762232393026352				1	2	44	PrePulse	78	0	2	32
2	2	27	Null	0	0	0	0	0	0	0	0	0	0	0	0	0	2	4													1	1	1	313	1.87918413500302	0.0072997520910576				1	2	44	Startle	120	0.0101	2	32
2	2	27	PrePulse	0.0530	27	26	-0.2565	1.7959	0.0178	0.0250	-0.0025	0.0250	1	20	20	66	2	4													1	1	1	314	1.88563557178713	0.00762232393026352				1	2	55	PrePulse	78	0	2	37
2	2	28	Null	0	0	0	0	0	0	0	0	0	0	0	0	0	2	26													1	1	1	315	1.87789384764619	0.00794489576946944				1	2	55	Startle	120	0.0219	2	37
2	2	28	PrePulse	0.0252	35	34	-0.2394	1.0051	0.0100	0.0136	-0.0024	0.0137	1	20	20	74	2	26													1	1	1	316	1.89079672121443	0.0072997520910576
2	2	28	Startle	0.1578	143	22	-0.4639	6.2517	0.0619	0.0802	-0.0046	0.0799	121	160	40	120	2	26													1	1	1	317	1.88079699419904	0.0072997520910576				ASRc
2	2	29	Null	0	0	0	0	0	0	0	0	0	0	0	0	0	2	36													1	1	1	318	1.8891838620184	0.00762232393026352				Chamber	Block ID	Trial ID	Period	Decibel	RmsVal	BlockId0	TrialId0
2	2	29	PrePulse	0.0136	34	33	-0.3214	0.6005	0.0059	0.0064	-0.0032	0.0071	1	20	20	78	2	36													1	1	1	319	1.87950670684222	0.0072997520910576				1	2	4	Startle	120	0.0136	2	17
2	2	29	Startle	0.2823	144	23	-0.2043	7.7081	0.0763	0.1196	-0.0020	0.1190	121	160	40	120	2	36													1	1	1	320	1.89176443673205	0.0072997520910576				1	2	9	Startle	120	0.0716	2	14
2	2	30	Null	0	0	0	0	0	0	0	0	0	0	0	0	0	2	38													1	1	1	321	1.88208728155587	0.00697718025185168				1	2	12	Startle	120	0.0609	2	11
2	2	30	PrePulse	0.0133	74	73	-0.2894	0.8547	0.0085	0.0100	-0.0029	0.0103	1	20	20	78	2	38													1	1	1	322	1.88821614650078	0.0072997520910576				1	2	18	Startle	120	0.0578	2	13
2	2	30	Startle	0.2262	143	22	-0.3275	6.0116	0.0595	0.0946	-0.0032	0.0942	121	160	40	120	2	38													1	1	1	323	1.87886156316381	0.0072997520910576				1	2	25	Startle	120	0.0211	2	18
2	2	31	Null	0	0	0	0	0	0	0	0	0	0	0	0	0	2	42													1	1	1	324	1.88886129017919	0.00762232393026352				1	2	43	Startle	120	0.0148	2	19
2	2	31	PrePulse	0.2736	24	23	-0.4804	8.3552	0.0827	0.1318	-0.0048	0.1313	1	20	20	86	2	42													1	1	1	325	1.88273242523428	0.0072997520910576				1	2	46	Startle	120	0.0259	2	15
2	2	31	Startle	0.0697	145	24	-0.7114	1.7421	0.0172	0.0245	-0.0070	0.0254	121	160	40	120	2	42													1	1	1	326	1.88692585914396	0.00762232393026352				1	2	50	Startle	120	0.0340	2	12
2	2	32	Null	0	0	0	0	0	0	0	0	0	0	0	0	0	2	47													1	1	1	327	1.87757127580699	0.00697718025185168				1	2	51	Startle	120	0.0350	2	20
2	2	32	PrePulse	0.2568	24	23	-0.3836	7.6857	0.0761	0.1231	-0.0038	0.1226	1	20	20	86	2	47													1	1	1	328	1.88305499707349	0.00697718025185168				1	2	53	Startle	120	0.0901	2	16
2	2	32	Startle	0.0613	145	24	-0.0914	2.0772	0.0206	0.0287	-0.0009	0.0286	121	160	40	120	2	47													1	1	1	329	1.88079699419904	0.00762232393026352
2	2	33	Null	0	0	0	0	0	0	0	0	0	0	0	0	0	2	39													1	1	1	330	1.88208728155587	0.00697718025185168				PPI Pct
2	2	33	PrePulse	0.0068	28	27	-0.4465	0.5246	0.0052	0.0047	-0.0044	0.0064	1	20	20	78	2	39													1	1	1	331	1.87660356028937	0.0072997520910576				Chamber	Type	Details	Result
2	2	33	Startle	0.2213	142	21	-0.4830	6.7934	0.0673	0.1048	-0.0048	0.1044	121	160	40	120	2	39													1	1	1	332	1.87789384764619	0.00633203657343984				1	ASRp	((0.0079 +0.0224 +0.0370 +0.0444 +0.0160 +0.0317 +0.0153 +0.0322 +0.0101 +0.0219)/10)*100	2.3890
2	2	34	Null	0	0	0	0	0	0	0	0	0	0	0	0	0	2	59													1	1	1	333	1.88079699419904	0.00697718025185168				1	ASRc	((0.0136 +0.0716 +0.0609 +0.0578 +0.0211 +0.0148 +0.0259 +0.0340 +0.0350 +0.0901)/10)*100	4.2480
2	2	34	PrePulse	0.3278	23	22	-0.5327	10.3931	0.1029	0.1573	-0.0053	0.1566	1	20	20	86	2	59													1	1	1	334	1.88208728155587	0.0072997520910576				1	PPI Pct	(ASRc - ASRp)/ASRc	43.7618
2	2	35	Null	0	0	0	0	0	0	0	0	0	0	0	0	0	2	7													1	1	1	335	1.87950670684222	0.0072997520910576
2	2	35	PrePulse	0.0104	26	25	-0.4020	0.6888	0.0068	0.0076	-0.0040	0.0085	1	20	20	66	2	7													1	1	1	336	1.87982927868143	0.00697718025185168				ASRp
2	2	36	Null	0	0	0	0	0	0	0	0	0	0	0	0	0	2	57													1	1	1	337	1.88176470971666	0.00665460841264576				Chamber	Block ID	Trial ID	Period	Decibel	RmsVal	BlockId0	TrialId0
2	2	36	PrePulse	0.1568	25	24	-0.4707	4.3596	0.0432	0.0608	-0.0047	0.0607	1	20	20	86	2	57													1	1	1	338	1.8837001407519	0.0072997520910576				1	2	13	PrePulse	86	0	2	43
2	2	37	Null	0	0	0	0	0	0	0	0	0	0	0	0	0	2	8													1	1	1	339	1.88176470971666	0.00794489576946944				1	2	13	Startle	120	0.0128	2	43
2	2	37	PrePulse	0.0149	35	34	-0.3762	0.7683	0.0076	0.0079	-0.0037	0.0087	1	20	20	66	2	8													1	1	1	340	1.88015185052063	0.00794489576946944				1	2	17	PrePulse	86	0	2	41
2	2	38	Null	0	0	0	0	0	0	0	0	0	0	0	0	0	2	54													1	1	1	341	1.88079699419904	0.00665460841264576				1	2	17	Startle	120	0.0107	2	41
2	2	38	PrePulse	0.0252	51	50	-0.3317	1.2262	0.0121	0.0152	-0.0033	0.0154	1	20	20	78	2	54													1	1	1	342	1.88499042810872	0.00762232393026352				1	2	21	PrePulse	86	0	2	49
2	2	39	Null	0	0	0	0	0	0	0	0	0	0	0	0	0	2	58													1	1	1	343	1.88273242523428	0.0072997520910576				1	2	21	Startle	120	0.0255	2	49
2	2	39	PrePulse	0.6142	27	26	-0.9678	14.6795	0.1453	0.2163	-0.0096	0.2154	1	20	20	86	2	58													1	1	1	344	1.88144213787746	0.00697718025185168				1	2	23	PrePulse	86	0	2	44
2	2	40	Null	0	0	0	0	0	0	0	0	0	0	0	0	0	2	23													1	1	1	345	1.88111956603825	0.0072997520910576				1	2	23	Startle	120	0.0060	2	44
2	2	40	PrePulse	0.0207	67	66	-0.5391	1.1652	0.0115	0.0126	-0.0053	0.0136	1	20	20	74	2	23													1	1	1	346	1.88434528443031	0.00762232393026352				1	2	31	PrePulse	86	0	2	42
2	2	40	Startle	0.2181	143	22	0.1954	6.3216	0.0626	0.0870	0.0019	0.0866	121	160	40	120	2	23													1	1	1	347	1.88337756891269	0.00794489576946944				1	2	31	Startle	120	0.0109	2	42
2	2	41	Null	0	0	0	0	0	0	0	0	0	0	0	0	0	2	60													1	1	1	348	1.88144213787746	0.00697718025185168				1	2	32	PrePulse	86	0	2	47
2	2	41	PrePulse	0.1472	24	23	-0.1846	3.9657	0.0393	0.0567	-0.0018	0.0564	1	20	20	86	2	60													1	1	1	349	1.8782164194854	0.00665460841264576				1	2	32	Startle	120	0.0139	2	47
2	2	42	Null	0	0	0	0	0	0	0	0	0	0	0	0	0	2	10													1	1	1	350	1.87692613212857	0.00697718025185168				1	2	47	PrePulse	86	0	2	46
2	2	42	PrePulse	0.0181	32	31	-0.3272	0.7122	0.0071	0.0093	-0.0032	0.0098	1	20	20	66	2	10													1	1	1	351	1.88208728155587	0.0072997520910576				1	2	47	Startle	120	0.0224	2	46
2	2	43	Null	0	0	0	0	0	0	0	0	0	0	0	0	0	2	19													1	1	1	352	1.87950670684222	0.00697718025185168				1	2	48	PrePulse	86	0	2	48
2	2	43	Startle	0.4371	142	21	-0.3656	10.6509	0.1055	0.1626	-0.0036	0.1618	121	160	40	120	2	19													1	1	1	353	1.87886156316381	0.0072997520910576				1	2	48	Startle	120	0.0075	2	48
2	2	44	Null	0	0	0	0	0	0	0	0	0	0	0	0	0	2	32													1	1	1	354	1.87789384764619	0.00697718025185168				1	2	56	PrePulse	86	0	2	45
2	2	44	PrePulse	0.0101	24	23	-0.3220	0.4788	0.0047	0.0052	-0.0032	0.0061	1	20	20	78	2	32													1	1	1	355	1.88273242523428	0.00697718025185168				1	2	56	Startle	120	0.0134	2	45
2	2	44	Startle	0.1975	143	22	-0.4388	5.6576	0.0560	0.0847	-0.0043	0.0844	121	160	40	120	2	32													1	1	1	356	1.88111956603825	0.0072997520910576				1	2	57	PrePulse	86	0	2	50
2	2	45	Null	0	0	0	0	0	0	0	0	0	0	0	0	0	2	1													1	1	1	357	1.88273242523428	0.00697718025185168				1	2	57	Startle	120	0.0095	2	50
2	2	45	PrePulse	0.0281	30	29	-0.3352	0.9820	0.0097	0.0119	-0.0033	0.0123	1	20	20	66	2	1													1	1	1	358	1.87950670684222	0.0072997520910576
2	2	46	Null	0	0	0	0	0	0	0	0	0	0	0	0	0	2	15													1	1	1	359	1.88305499707349	0.00697718025185168				ASRc
2	2	46	Startle	0.5100	143	22	-0.6672	15.6276	0.1547	0.2295	-0.0066	0.2285	121	160	40	120	2	15													1	1	1	360	1.8840227125911	0.00697718025185168				Chamber	Block ID	Trial ID	Period	Decibel	RmsVal	BlockId0	TrialId0
2	2	47	Null	0	0	0	0	0	0	0	0	0	0	0	0	0	2	46													1	1	1	361	1.88208728155587	0.00762232393026352				1	2	4	Startle	120	0.0136	2	17
2	2	47	PrePulse	0.1426	26	25	-0.5881	4.2393	0.0420	0.0584	-0.0058	0.0584	1	20	20	86	2	46													1	1	1	362	1.87982927868143	0.00697718025185168				1	2	9	Startle	120	0.0716	2	14
2	2	47	Startle	0.0591	145	24	-0.6510	1.7395	0.0172	0.0228	-0.0064	0.0236	121	160	40	120	2	46													1	1	1	363	1.87950670684222	0.00697718025185168				1	2	12	Startle	120	0.0609	2	11
2	2	48	Null	0	0	0	0	0	0	0	0	0	0	0	0	0	2	48													1	1	1	364	1.88531299994793	0.00697718025185168				1	2	18	Startle	120	0.0578	2	13
2	2	48	PrePulse	0.2713	25	24	-0.4220	6.5019	0.0644	0.1016	-0.0042	0.1012	1	20	20	86	2	48													1	1	1	365	1.88240985339507	0.00633203657343984				1	2	25	Startle	120	0.0211	2	18
2	2	48	Startle	0.0617	144	23	-0.0662	1.8307	0.0181	0.0238	-0.0007	0.0237	121	160	40	120	2	48													1	1	1	366	1.88111956603825	0.00794489576946944				1	2	43	Startle	120	0.0148	2	19
2	2	49	Null	0	0	0	0	0	0	0	0	0	0	0	0	0	2	53													1	1	1	367	1.87982927868143	0.00697718025185168				1	2	46	Startle	120	0.0259	2	15
2	2	49	PrePulse	0.0530	24	23	-0.3536	1.8014	0.0178	0.0227	-0.0035	0.0228	1	20	20	74	2	53													1	1	1	368	1.88240985339507	0.00633203657343984				1	2	50	Startle	120	0.0340	2	12
2	2	50	Null	0	0	0	0	0	0	0	0	0	0	0	0	0	2	12													1	1	1	369	1.88176470971666	0.00697718025185168				1	2	51	Startle	120	0.0350	2	20
2	2	50	Startle	0.3768	144	23	0.3264	10.3298	0.1023	0.1436	0.0032	0.1429	121	160	40	120	2	12													1	1	1	370	1.87918413500302	0.0072997520910576				1	2	53	Startle	120	0.0901	2	16
2	2	51	Null	0	0	0	0	0	0	0	0	0	0	0	0	0	2	20													1	1	1	371	1.87789384764619	0.0072997520910576
2	2	51	Startle	0.3920	143	22	-0.4514	9.0711	0.0898	0.1473	-0.0045	0.1466	121	160	40	120	2	20													1	1	1	372	1.87950670684222	0.00633203657343984				PPI Pct
2	2	52	Null	0	0	0	0	0	0	0	0	0	0	0	0	0	2	55													1	1	1	373	1.88111956603825	0.00697718025185168				Chamber	Type	Details	Result
2	2	52	PrePulse	0.0162	46	45	-0.2036	0.6604	0.0065	0.0085	-0.0020	0.0087	1	20	20	78	2	55													1	1	1	374	1.87886156316381	0.0072997520910576				1	ASRp	((0.0128 +0.0107 +0.0255 +0.0060 +0.0109 +0.0139 +0.0224 +0.0075 +0.0134 +0.0095)/10)*100	1.3260
2	2	53	Null	0	0	0	0	0	0	0	0	0	0	0	0	0	2	16													1	1	1	375	1.87950670684222	0.0072997520910576				1	ASRc	((0.0136 +0.0716 +0.0609 +0.0578 +0.0211 +0.0148 +0.0259 +0.0340 +0.0350 +0.0901)/10)*100	4.2480
2	2	53	Startle	0.4252	143	22	-0.0672	9.7083	0.0961	0.1539	-0.0007	0.1531	121	160	40	120	2	16													1	1	1	376	1.8785389913246	0.0072997520910576				1	PPI Pct	(ASRc - ASRp)/ASRc	68.7853
2	2	54	Null	0	0	0	0	0	0	0	0	0	0	0	0	0	2	3													1	1	1	377	1.88531299994793	0.00697718025185168
2	2	54	PrePulse	0.0101	30	29	-0.2985	0.5224	0.0052	0.0063	-0.0030	0.0069	1	20	20	66	2	3													1	1	1	378	1.88240985339507	0.00762232393026352				ASRp
2	2	55	Null	0	0	0	0	0	0	0	0	0	0	0	0	0	2	37													1	1	1	379	1.88208728155587	0.00762232393026352				Chamber	Block ID	Trial ID	Period	Decibel	StdevVal	BlockId0	TrialId0
2	2	55	PrePulse	0.0055	89	88	-0.3836	0.5072	0.0050	0.0058	-0.0038	0.0069	1	20	20	78	2	37													1	1	1	380	1.88144213787746	0.00762232393026352				1	2	1	PrePulse	74	0	2	30
2	2	55	Startle	0.0813	142	21	-0.4085	2.3789	0.0236	0.0333	-0.0040	0.0334	121	160	40	120	2	37													1	1	1	381	1.88531299994793	0.00697718025185168				1	2	1	Startle	120	0.0379	2	30
2	2	56	Null	0	0	0	0	0	0	0	0	0	0	0	0	0	2	45													1	1	1	382	1.8837001407519	0.00794489576946944				1	2	2	PrePulse	74	0	2	25
2	2	56	PrePulse	0.1136	25	24	-0.1685	3.4116	0.0338	0.0503	-0.0017	0.0500	1	20	20	86	2	45													1	1	1	383	1.8840227125911	0.00762232393026352				1	2	2	Startle	120	0.0544	2	25
2	2	56	Startle	0.0381	147	26	-0.1607	1.1177	0.0111	0.0145	-0.0016	0.0146	121	160	40	120	2	45													1	1	1	384	1.88047442235984	0.00697718025185168				1	2	3	PrePulse	74	0	2	28
2	2	57	Null	0	0	0	0	0	0	0	0	0	0	0	0	0	2	50													1	1	1	385	1.88240985339507	0.00762232393026352				1	2	3	Startle	120	0.0422	2	28
2	2	57	PrePulse	0.1920	24	23	-0.2214	5.4171	0.0536	0.0770	-0.0022	0.0767	1	20	20	86	2	50													1	1	1	386	1.88337756891269	0.00762232393026352				1	2	7	PrePulse	74	0	2	22
2	2	57	Startle	0.0330	146	25	-0.5004	1.4372	0.0142	0.0190	-0.0050	0.0195	121	160	40	120	2	50													1	1	1	387	1.88305499707349	0.00697718025185168				1	2	7	Startle	120	0.0192	2	22
2	2	58	Null	0	0	0	0	0	0	0	0	0	0	0	0	0	2	51													1	1	1	388	1.87918413500302	0.00762232393026352				1	2	11	PrePulse	74	0	2	27
2	2	58	PrePulse	0.0662	24	23	-0.4572	2.1014	0.0208	0.0263	-0.0045	0.0266	1	20	20	74	2	51													1	1	1	389	1.87918413500302	0.00762232393026352				1	2	11	Startle	120	0.0590	2	27
2	2	59	Null	0	0	0	0	0	0	0	0	0	0	0	0	0	2	21													1	1	1	390	1.88240985339507	0.00762232393026352				1	2	24	PrePulse	74	0	2	24
2	2	59	PrePulse	0.0194	37	36	-0.3562	0.6653	0.0066	0.0077	-0.0035	0.0085	1	20	20	74	2	21													1	1	1	391	1.88176470971666	0.00762232393026352				1	2	24	Startle	120	0.0701	2	24
2	2	59	Startle	0.2178	142	21	0.0896	5.4690	0.0541	0.0825	0.0009	0.0821	121	160	40	120	2	21													1	1	1	392	1.8782164194854	0.00762232393026352				1	2	26	PrePulse	74	0	2	29
2	2	60	Null	0	0	0	0	0	0	0	0	0	0	0	0	0	2	56													1	1	1	393	1.8785389913246	0.00697718025185168				1	2	26	Startle	120	0.0078	2	29
2	2	60	PrePulse	0.0194	41	40	-0.3481	0.7486	0.0074	0.0095	-0.0034	0.0101	1	20	20	78	2	56													1	1	1	394	1.87918413500302	0.00697718025185168				1	2	28	PrePulse	74	0	2	26
2	3	1	Null	0	0	0	0	0	0	0	0	0	0	0	0	0	3	1													1	1	1	395	1.88176470971666	0.0072997520910576				1	2	28	Startle	120	0.0483	2	26
2	3	1	Startle	0.4236	143	22	0.2412	11.0327	0.1092	0.1664	0.0024	0.1656	121	160	40	120	3	1													1	1	1	396	1.87886156316381	0.0072997520910576				1	2	40	PrePulse	74	0	2	23
2	3	2	Null	0	0	0	0	0	0	0	0	0	0	0	0	0	3	2													1	1	1	397	1.87918413500302	0.00697718025185168				1	2	40	Startle	120	0.0101	2	23
2	3	2	Startle	0.4459	143	22	-0.0362	11.6024	0.1149	0.1774	-0.0004	0.1765	121	160	40	120	3	2													1	1	1	398	1.8782164194854	0.00762232393026352				1	2	59	PrePulse	74	0	2	21
2	3	3	Null	0	0	0	0	0	0	0	0	0	0	0	0	0	3	3													1	1	1	399	1.8840227125911	0.0072997520910576				1	2	59	Startle	120	0.0054	2	21
2	3	3	Startle	0.3978	143	22	0.3396	9.8061	0.0971	0.1443	0.0034	0.1436	121	160	40	120	3	3													1	1	1	400	1.88079699419904	0.00665460841264576
2	3	4	Null	0	0	0	0	0	0	0	0	0	0	0	0	0	3	4													1	1	1	401	1.88240985339507	0.0072997520910576				ASRc
2	3	4	Startle	0.3742	143	22	0.2331	8.7649	0.0868	0.1355	0.0023	0.1349	121	160	40	120	3	4													1	1	1	402	1.87789384764619	0.00697718025185168				Chamber	Block ID	Trial ID	Period	Decibel	StdevVal	BlockId0	TrialId0
2	3	5	Null	0	0	0	0	0	0	0	0	0	0	0	0	0	3	5													1	1	1	403	1.88499042810872	0.0072997520910576				1	2	4	Startle	120	0.0132	2	17
2	3	5	Startle	0.3004	143	22	-0.2030	7.4525	0.0738	0.1147	-0.0020	0.1142	121	160	40	120	3	5													1	1	1	404	1.88176470971666	0.00697718025185168				1	2	9	Startle	120	0.0719	2	14
2	3	6	Null	0	0	0	0	0	0	0	0	0	0	0	0	0	3	6													1	1	1	405	1.88240985339507	0.0072997520910576				1	2	12	Startle	120	0.0611	2	11
2	3	6	Startle	0.5010	143	22	-0.0278	11.7001	0.1158	0.1835	-0.0003	0.1826	121	160	40	120	3	6													1	1	1	406	1.8782164194854	0.0072997520910576				1	2	18	Startle	120	0.0580	2	13
2	3	7	Null	0	0	0	0	0	0	0	0	0	0	0	0	0	3	7													1	1	1	407	1.87950670684222	0.00665460841264576				1	2	25	Startle	120	0.0199	2	18
2	3	7	Startle	0.2665	142	21	-0.5278	6.3045	0.0624	0.1000	-0.0052	0.0997	121	160	40	120	3	7													1	1	1	408	1.88111956603825	0.00697718025185168				1	2	43	Startle	120	0.0143	2	19
2	3	8	Null	0	0	0	0	0	0	0	0	0	0	0	0	0	3	8													1	1	1	409	1.88273242523428	0.00697718025185168				1	2	46	Startle	120	0.0257	2	15
2	3	8	Startle	0.3930	143	22	-0.6607	9.1334	0.0904	0.1441	-0.0065	0.1436	121	160	40	120	3	8													1	1	1	410	1.8785389913246	0.00697718025185168				1	2	50	Startle	120	0.0339	2	12
2	3	9	Null	0	0	0	0	0	0	0	0	0	0	0	0	0	3	9													1	1	1	411	1.88079699419904	0.00762232393026352				1	2	51	Startle	120	0.0351	2	20
2	3	9	Startle	0.3571	143	22	0.4070	8.7703	0.0868	0.1347	0.0040	0.1341	121	160	40	120	3	9													1	1	1	412	1.88208728155587	0.00762232393026352				1	2	53	Startle	120	0.0905	2	16
2	3	10	Null	0	0	0	0	0	0	0	0	0	0	0	0	0	3	10													1	1	1	413	1.88240985339507	0.0072997520910576
2	3	10	Startle	0.2971	142	21	-0.0011	6.8502	0.0678	0.1101	0.0000	0.1096	121	160	40	120	3	10													1	1	1	414	1.8782164194854	0.00794489576946944				PPI Pct
																															1	1	1	415	1.87950670684222	0.00762232393026352				Chamber	Type	Details	Result
Chamber ID	DataType	Decibel	ASRp(%)	ASRc(%)	PPI Pct(%)																										1	1	1	416	1.88047442235984	0.0072997520910576				1	ASRp	((0.0379 +0.0544 +0.0422 +0.0192 +0.0590 +0.0701 +0.0078 +0.0483 +0.0101 +0.0054)/10)*100	3.5440
2	PeakVal	74	17.8420	39.5200	54.8532																										1	1	1	417	1.8837001407519	0.00762232393026352				1	ASRc	((0.0132 +0.0719 +0.0611 +0.0580 +0.0199 +0.0143 +0.0257 +0.0339 +0.0351 +0.0905)/10)*100	4.2360
2	PeakVal	78	18.7760	39.5200	52.4899																										1	1	1	418	1.87982927868143	0.0072997520910576				1	PPI Pct	(ASRc - ASRp)/ASRc	16.3362
2	PeakVal	86	4.3800	39.5200	88.9170																										1	1	1	419	1.88144213787746	0.00665460841264576
																															1	1	1	420	1.8785389913246	0.00697718025185168				ASRp
Chamber ID	DataType	Decibel	ASRp(%)	ASRc(%)	PPI Pct(%)																										1	1	1	421	1.88692585914396	0.00697718025185168				Chamber	Block ID	Trial ID	Period	Decibel	StdevVal	BlockId0	TrialId0
2	AvgVal	74	-0.1550	-0.2520	38.4921																										1	1	1	422	1.88240985339507	0.00665460841264576				1	2	5	PrePulse	78	0	2	34
2	AvgVal	78	-0.3930	-0.2520	-55.9524																										1	1	1	423	1.88337756891269	0.00697718025185168				1	2	5	Startle	120	0.0073	2	34
2	AvgVal	86	-0.4870	-0.2520	-93.2540																										1	1	1	424	1.88079699419904	0.00665460841264576				1	2	6	PrePulse	78	0	2	35
																															1	1	1	425	1.88499042810872	0.00697718025185168				1	2	6	Startle	120	0.0222	2	35
Chamber ID	DataType	Decibel	ASRp(%)	ASRc(%)	PPI Pct(%)																										1	1	1	426	1.88176470971666	0.00697718025185168				1	2	16	PrePulse	78	0	2	31
2	RmsVal	74	7.1740	15.6950	54.2912																										1	1	1	427	1.88305499707349	0.0072997520910576				1	2	16	Startle	120	0.0370	2	31
2	RmsVal	78	7.7810	15.6950	50.4237																										1	1	1	428	1.87886156316381	0.00665460841264576				1	2	19	PrePulse	78	0	2	40
2	RmsVal	86	2.0400	15.6950	87.0022																										1	1	1	429	1.88176470971666	0.00697718025185168				1	2	19	Startle	120	0.0444	2	40
																															1	1	1	430	1.88208728155587	0.0072997520910576				1	2	20	PrePulse	78	0	2	33
Chamber ID	DataType	Decibel	ASRp(%)	ASRc(%)	PPI Pct(%)																										1	1	1	431	1.88273242523428	0.0072997520910576				1	2	20	Startle	120	0.0159	2	33
2	StdevVal	74	7.2020	15.7650	54.3165																										1	1	1	432	1.87982927868143	0.00697718025185168				1	2	29	PrePulse	78	0	2	36
2	StdevVal	78	7.8020	15.7650	50.5106																										1	1	1	433	1.87918413500302	0.00762232393026352				1	2	29	Startle	120	0.0315	2	36
2	StdevVal	86	1.9590	15.7650	87.5737																										1	1	1	434	1.88208728155587	0.00697718025185168				1	2	30	PrePulse	78	0	2	38
																															1	1	1	435	1.88273242523428	0.00697718025185168				1	2	30	Startle	120	0.0146	2	38
																															1	1	1	436	1.87982927868143	0.00762232393026352				1	2	33	PrePulse	78	0	2	39
																															1	1	1	437	1.88047442235984	0.00697718025185168				1	2	33	Startle	120	0.0321	2	39
																															1	1	1	438	1.88015185052063	0.00697718025185168				1	2	44	PrePulse	78	0	2	32
																															1	1	1	439	1.88305499707349	0.00762232393026352				1	2	44	Startle	120	0.0093	2	32
																															1	1	1	440	1.88047442235984	0.00762232393026352				1	2	55	PrePulse	78	0	2	37
																															1	1	1	441	1.87918413500302	0.0072997520910576				1	2	55	Startle	120	0.0216	2	37
																															1	1	1	442	1.87757127580699	0.0072997520910576
																															1	1	1	443	1.8837001407519	0.00600946473423392				ASRc
																															1	1	1	444	1.87886156316381	0.00762232393026352				Chamber	Block ID	Trial ID	Period	Decibel	StdevVal	BlockId0	TrialId0
																															1	1	1	445	1.88144213787746	0.00697718025185168				1	2	4	Startle	120	0.0132	2	17
																															1	1	1	446	1.87724870396778	0.00697718025185168				1	2	9	Startle	120	0.0719	2	14
																															1	1	1	447	1.8840227125911	0.0072997520910576				1	2	12	Startle	120	0.0611	2	11
																															1	1	1	448	1.88144213787746	0.0072997520910576				1	2	18	Startle	120	0.0580	2	13
																															1	1	1	449	1.88176470971666	0.00826746760867536				1	2	25	Startle	120	0.0199	2	18
																															1	1	1	450	1.87982927868143	0.00697718025185168				1	2	43	Startle	120	0.0143	2	19
																															1	1	1	451	1.88111956603825	0.0072997520910576				1	2	46	Startle	120	0.0257	2	15
																															1	1	1	452	1.88434528443031	0.00697718025185168				1	2	50	Startle	120	0.0339	2	12
																															1	1	1	453	1.8840227125911	0.0072997520910576				1	2	51	Startle	120	0.0351	2	20
																															1	1	1	454	1.88047442235984	0.0072997520910576				1	2	53	Startle	120	0.0905	2	16
																															1	1	1	455	1.88047442235984	0.0072997520910576
																															1	1	1	456	1.88305499707349	0.00697718025185168				PPI Pct
																															1	1	1	457	1.88305499707349	0.0072997520910576				Chamber	Type	Details	Result
																															1	1	1	458	1.88015185052063	0.00633203657343984				1	ASRp	((0.0073 +0.0222 +0.0370 +0.0444 +0.0159 +0.0315 +0.0146 +0.0321 +0.0093 +0.0216)/10)*100	2.3590
																															1	1	1	459	1.87886156316381	0.00697718025185168				1	ASRc	((0.0132 +0.0719 +0.0611 +0.0580 +0.0199 +0.0143 +0.0257 +0.0339 +0.0351 +0.0905)/10)*100	4.2360
																															1	1	1	460	1.87918413500302	0.00794489576946944				1	PPI Pct	(ASRc - ASRp)/ASRc	44.3107
																															1	1	1	461	1.88273242523428	0.0072997520910576
																															1	1	1	462	1.87950670684222	0.00762232393026352				ASRp
																															1	1	1	463	1.88079699419904	0.0072997520910576				Chamber	Block ID	Trial ID	Period	Decibel	StdevVal	BlockId0	TrialId0
																															1	1	1	464	1.87660356028937	0.00697718025185168				1	2	13	PrePulse	86	0	2	43
																															1	1	1	465	1.88273242523428	0.00794489576946944				1	2	13	Startle	120	0.0122	2	43
																															1	1	1	466	1.88015185052063	0.00697718025185168				1	2	17	PrePulse	86	0	2	41
																															1	1	1	467	1.88144213787746	0.00600946473423392				1	2	17	Startle	120	0.0102	2	41
																															1	1	1	468	1.8782164194854	0.00697718025185168				1	2	21	PrePulse	86	0	2	49
																															1	1	1	469	1.88144213787746	0.00697718025185168				1	2	21	Startle	120	0.0254	2	49
																															1	1	1	470	1.88144213787746	0.00697718025185168				1	2	23	PrePulse	86	0	2	44
																															1	1	1	471	1.88273242523428	0.0072997520910576				1	2	23	Startle	120	0.0050	2	44
																															1	1	1	472	1.8782164194854	0.00665460841264576				1	2	31	PrePulse	86	0	2	42
																															1	1	1	473	1.88047442235984	0.00697718025185168				1	2	31	Startle	120	0.0106	2	42
																															1	1	1	474	1.88240985339507	0.00633203657343984				1	2	32	PrePulse	86	0	2	47
																															1	1	1	475	1.8837001407519	0.0072997520910576				1	2	32	Startle	120	0.0137	2	47
																															1	1	1	476	1.88208728155587	0.00762232393026352				1	2	47	PrePulse	86	0	2	46
																															1	1	1	477	1.88144213787746	0.00665460841264576				1	2	47	Startle	120	0.0225	2	46
																															1	1	1	478	1.88305499707349	0.00697718025185168				1	2	48	PrePulse	86	0	2	48
																															1	1	1	479	1.88531299994793	0.0072997520910576				1	2	48	Startle	120	0.0066	2	48
																															1	1	1	480	1.88111956603825	0.00697718025185168				1	2	56	PrePulse	86	0	2	45
																															1	1	1	481	1.88240985339507	0.0072997520910576				1	2	56	Startle	120	0.0129	2	45
																															1	1	1	482	1.88208728155587	0.00762232393026352				1	2	57	PrePulse	86	0	2	50
																															1	1	1	483	1.88595814362634	0.0072997520910576				1	2	57	Startle	120	0.0089	2	50
																															1	1	1	484	1.88240985339507	0.0072997520910576
																															1	1	1	485	1.8837001407519	0.0072997520910576				ASRc
																															1	1	1	486	1.87886156316381	0.00665460841264576				Chamber	Block ID	Trial ID	Period	Decibel	StdevVal	BlockId0	TrialId0
																															1	1	1	487	1.88531299994793	0.00633203657343984				1	2	4	Startle	120	0.0132	2	17
																															1	1	1	488	1.88047442235984	0.00600946473423392				1	2	9	Startle	120	0.0719	2	14
																															1	1	1	489	1.88273242523428	0.00697718025185168				1	2	12	Startle	120	0.0611	2	11
																															1	1	1	490	1.87660356028937	0.00697718025185168				1	2	18	Startle	120	0.0580	2	13
																															1	1	1	491	1.88273242523428	0.00665460841264576				1	2	25	Startle	120	0.0199	2	18
																															1	1	1	492	1.88079699419904	0.0072997520910576				1	2	43	Startle	120	0.0143	2	19
																															1	1	1	493	1.88305499707349	0.00697718025185168				1	2	46	Startle	120	0.0257	2	15
																															1	1	1	494	1.87982927868143	0.00794489576946944				1	2	50	Startle	120	0.0339	2	12
																															1	1	1	495	1.88208728155587	0.00665460841264576				1	2	51	Startle	120	0.0351	2	20
																															1	1	1	496	1.8837001407519	0.00697718025185168				1	2	53	Startle	120	0.0905	2	16
																															1	1	1	497	1.88660328730475	0.00794489576946944
																															1	1	1	498	1.88176470971666	0.00600946473423392				PPI Pct
																															1	1	1	499	1.88628071546555	0.0072997520910576				Chamber	Type	Details	Result
																															1	1	1	500	1.88531299994793	0.0072997520910576				1	ASRp	((0.0122 +0.0102 +0.0254 +0.0050 +0.0106 +0.0137 +0.0225 +0.0066 +0.0129 +0.0089)/10)*100	1.2800
																															1	1	1	501	1.8891838620184	0.00826746760867536				1	ASRc	((0.0132 +0.0719 +0.0611 +0.0580 +0.0199 +0.0143 +0.0257 +0.0339 +0.0351 +0.0905)/10)*100	4.2360
																															1	1	1	502	1.88337756891269	0.0072997520910576				1	PPI Pct	(ASRc - ASRp)/ASRc	69.7828
																															1	1	1	503	1.88434528443031	0.00762232393026352
																															1	1	1	504	1.88015185052063	0.0072997520910576				ASRp
																															1	1	1	505	1.88853871833999	0.00697718025185168				Chamber	Block ID	Trial ID	Period	Decibel	PeakVal	BlockId0	TrialId0
																															1	1	1	506	1.88176470971666	0.0072997520910576				2	2	1	PrePulse	74	0	2	30
																															1	1	1	507	1.8837001407519	0.00633203657343984				2	2	1	Startle	120	0.2175	2	30
																															1	1	1	508	1.87692613212857	0.00762232393026352				2	2	2	PrePulse	74	0	2	25
																															1	1	1	509	1.8837001407519	0.00665460841264576				2	2	2	Startle	120	0.1401	2	25
																															1	1	1	510	1.87789384764619	0.00762232393026352				2	2	3	PrePulse	74	0	2	28
																															1	1	1	511	1.88047442235984	0.00762232393026352				2	2	3	Startle	120	0.2130	2	28
																															1	1	1	512	1.87595841661096	0.0072997520910576				2	2	7	PrePulse	74	0	2	22
																															1	1	1	513	1.88047442235984	0.00665460841264576				2	2	7	Startle	120	0.1094	2	22
																															1	1	1	514	1.87950670684222	0.0072997520910576				2	2	11	PrePulse	74	0	2	27
																															1	1	1	515	1.88208728155587	0.00762232393026352				2	2	11	Startle	120	0.1226	2	27
																															1	1	1	516	1.87692613212857	0.00697718025185168				2	2	24	PrePulse	74	0	2	24
																															1	1	1	517	1.88015185052063	0.00665460841264576				2	2	24	Startle	120	0.2859	2	24
																															1	1	1	518	1.88240985339507	0.00665460841264576				2	2	26	PrePulse	74	0	2	29
																															1	1	1	519	1.88499042810872	0.00794489576946944				2	2	26	Startle	120	0.1020	2	29
																															1	1	1	520	1.88144213787746	0.00697718025185168				2	2	28	PrePulse	74	0	2	26
																															1	1	1	521	1.88176470971666	0.00762232393026352				2	2	28	Startle	120	0.1578	2	26
																															1	1	1	522	1.8837001407519	0.00697718025185168				2	2	40	PrePulse	74	0	2	23
																															1	1	1	523	1.88595814362634	0.0072997520910576				2	2	40	Startle	120	0.2181	2	23
																															1	1	1	524	1.88079699419904	0.00762232393026352				2	2	59	PrePulse	74	0	2	21
																															1	1	1	525	1.88240985339507	0.0072997520910576				2	2	59	Startle	120	0.2178	2	21
																															1	1	1	526	1.88079699419904	0.00665460841264576
																															1	1	1	527	1.88434528443031	0.00794489576946944				ASRc
																															1	1	1	528	1.88144213787746	0.00697718025185168				Chamber	Block ID	Trial ID	Period	Decibel	PeakVal	BlockId0	TrialId0
																															1	1	1	529	1.88111956603825	0.00762232393026352				2	2	4	Startle	120	0.2852	2	17
																															1	1	1	530	1.87789384764619	0.0072997520910576				2	2	9	Startle	120	0.3868	2	14
																															1	1	1	531	1.88499042810872	0.0072997520910576				2	2	12	Startle	120	0.3517	2	11
																															1	1	1	532	1.88208728155587	0.00762232393026352				2	2	18	Startle	120	0.5039	2	13
																															1	1	1	533	1.88434528443031	0.00697718025185168				2	2	25	Startle	120	0.2833	2	18
																															1	1	1	534	1.88079699419904	0.0072997520910576				2	2	43	Startle	120	0.4371	2	19
																															1	1	1	535	1.8840227125911	0.00697718025185168				2	2	46	Startle	120	0.5100	2	15
																															1	1	1	536	1.8840227125911	0.00697718025185168				2	2	50	Startle	120	0.3768	2	12
																															1	1	1	537	1.88466785626952	0.00665460841264576				2	2	51	Startle	120	0.3920	2	20
																															1	1	1	538	1.88240985339507	0.0072997520910576				2	2	53	Startle	120	0.4252	2	16
																															1	1	1	539	1.88176470971666	0.00697718025185168
																															1	1	1	540	1.88434528443031	0.00762232393026352				PPI Pct
																															1	1	1	541	1.88499042810872	0.00762232393026352				Chamber	Type	Details	Result
																															1	1	1	542	1.88079699419904	0.00762232393026352				2	ASRp	((0.2175 +0.1401 +0.2130 +0.1094 +0.1226 +0.2859 +0.1020 +0.1578 +0.2181 +0.2178)/10)*100	17.8420
																															1	1	1	543	1.88176470971666	0.00762232393026352				2	ASRc	((0.2852 +0.3868 +0.3517 +0.5039 +0.2833 +0.4371 +0.5100 +0.3768 +0.3920 +0.4252)/10)*100	39.5200
																															1	1	1	544	1.88111956603825	0.00697718025185168				2	PPI Pct	(ASRc - ASRp)/ASRc	54.8532
																															1	1	1	545	1.88595814362634	0.0072997520910576
																															1	1	1	546	1.88176470971666	0.00633203657343984				ASRp
																															1	1	1	547	1.88144213787746	0.00665460841264576				Chamber	Block ID	Trial ID	Period	Decibel	PeakVal	BlockId0	TrialId0
																															1	1	1	548	1.87628098845016	0.00762232393026352				2	2	5	PrePulse	78	0	2	34
																															1	1	1	549	1.88079699419904	0.00794489576946944				2	2	5	Startle	120	0.0894	2	34
																															1	1	1	550	1.87886156316381	0.00697718025185168				2	2	6	PrePulse	78	0	2	35
																															1	1	1	551	1.88015185052063	0.00762232393026352				2	2	6	Startle	120	0.1859	2	35
																															1	1	1	552	1.87660356028937	0.00697718025185168				2	2	16	PrePulse	78	0	2	31
																															1	1	1	553	1.87789384764619	0.0072997520910576				2	2	16	Startle	120	0.2504	2	31
																															1	1	1	554	1.88015185052063	0.0072997520910576				2	2	19	PrePulse	78	0	2	40
																															1	1	1	555	1.88015185052063	0.0072997520910576				2	2	19	Startle	120	0.1342	2	40
																															1	1	1	556	1.8785389913246	0.00697718025185168				2	2	20	PrePulse	78	0	2	33
																															1	1	1	557	1.87950670684222	0.00859003944788128				2	2	20	Startle	120	0.2091	2	33
																															1	1	1	558	1.88144213787746	0.0072997520910576				2	2	29	PrePulse	78	0	2	36
																															1	1	1	559	1.88499042810872	0.00826746760867536				2	2	29	Startle	120	0.2823	2	36
																															1	1	1	560	1.88015185052063	0.00697718025185168				2	2	30	PrePulse	78	0	2	38
																															1	1	1	561	1.88337756891269	0.00633203657343984				2	2	30	Startle	120	0.2262	2	38
																															1	1	1	562	1.8785389913246	0.0072997520910576				2	2	33	PrePulse	78	0	2	39
																															1	1	1	563	1.88692585914396	0.0072997520910576				2	2	33	Startle	120	0.2213	2	39
																															1	1	1	564	1.88273242523428	0.0072997520910576				2	2	44	PrePulse	78	0	2	32
																															1	1	1	565	1.88595814362634	0.00665460841264576				2	2	44	Startle	120	0.1975	2	32
																															1	1	1	566	1.87886156316381	0.00665460841264576				2	2	55	PrePulse	78	0	2	37
																															1	1	1	567	1.88724843098316	0.00697718025185168				2	2	55	Startle	120	0.0813	2	37
																															1	1	1	568	1.88240985339507	0.0072997520910576
																															1	1	1	569	1.88692585914396	0.00762232393026352				ASRc
																															1	1	1	570	1.87918413500302	0.00762232393026352				Chamber	Block ID	Trial ID	Period	Decibel	PeakVal	BlockId0	TrialId0
																															1	1	1	571	1.8837001407519	0.00697718025185168				2	2	4	Startle	120	0.2852	2	17
																															1	1	1	572	1.88305499707349	0.0072997520910576				2	2	9	Startle	120	0.3868	2	14
																															1	1	1	573	1.88692585914396	0.00665460841264576				2	2	12	Startle	120	0.3517	2	11
																															1	1	1	574	1.87982927868143	0.00600946473423392				2	2	18	Startle	120	0.5039	2	13
																															1	1	1	575	1.88563557178713	0.00697718025185168				2	2	25	Startle	120	0.2833	2	18
																															1	1	1	576	1.88337756891269	0.0072997520910576				2	2	43	Startle	120	0.4371	2	19
																															1	1	1	577	1.89079672121443	0.00665460841264576				2	2	46	Startle	120	0.5100	2	15
																															1	1	1	578	1.88208728155587	0.0072997520910576				2	2	50	Startle	120	0.3768	2	12
																															1	1	1	579	1.88789357466158	0.00697718025185168				2	2	51	Startle	120	0.3920	2	20
																															1	1	1	580	1.88273242523428	0.00697718025185168				2	2	53	Startle	120	0.4252	2	16
																															1	1	1	581	1.89208700857125	0.00762232393026352
																															1	1	1	582	1.8837001407519	0.00697718025185168				PPI Pct
																															1	1	1	583	1.88886129017919	0.00762232393026352				Chamber	Type	Details	Result
																															1	1	1	584	1.8785389913246	0.005686892895028				2	ASRp	((0.0894 +0.1859 +0.2504 +0.1342 +0.2091 +0.2823 +0.2262 +0.2213 +0.1975 +0.0813)/10)*100	18.7760
																															1	1	1	585	1.89111929305363	0.00794489576946944				2	ASRc	((0.2852 +0.3868 +0.3517 +0.5039 +0.2833 +0.4371 +0.5100 +0.3768 +0.3920 +0.4252)/10)*100	39.5200
																															1	1	1	586	1.87918413500302	0.00762232393026352				2	PPI Pct	(ASRc - ASRp)/ASRc	52.4899
																															1	1	1	587	1.88628071546555	0.00697718025185168
																															1	1	1	588	1.87499070109334	0.00697718025185168				ASRp
																															1	1	1	589	1.88563557178713	0.00697718025185168				Chamber	Block ID	Trial ID	Period	Decibel	PeakVal	BlockId0	TrialId0
																															1	1	1	590	1.87724870396778	0.00665460841264576				2	2	13	PrePulse	86	0	2	43
																															1	1	1	591	1.8837001407519	0.00762232393026352				2	2	13	Startle	120	0.0088	2	43
																															1	1	1	592	1.87499070109334	0.00762232393026352				2	2	17	PrePulse	86	0	2	41
																															1	1	1	593	1.88240985339507	0.00697718025185168				2	2	17	Startle	120	0.0310	2	41
																															1	1	1	594	1.88079699419904	0.00762232393026352				2	2	21	PrePulse	86	0	2	49
																															1	1	1	595	1.88531299994793	0.00665460841264576				2	2	21	Startle	120	0.0404	2	49
																															1	1	1	596	1.87918413500302	0.00697718025185168				2	2	23	PrePulse	86	0	2	44
																															1	1	1	597	1.88047442235984	0.0072997520910576				2	2	23	Startle	120	0.0349	2	44
																															1	1	1	598	1.88240985339507	0.00697718025185168				2	2	31	PrePulse	86	0	2	42
																															1	1	1	599	1.88273242523428	0.00697718025185168				2	2	31	Startle	120	0.0697	2	42
																															1	1	1	600	1.88079699419904	0.00762232393026352				2	2	32	PrePulse	86	0	2	47
																															1	1	1	601	1.87982927868143	0.00826746760867536				2	2	32	Startle	120	0.0613	2	47
																															1	1	1	602	1.8785389913246	0.00762232393026352				2	2	47	PrePulse	86	0	2	46
																															1	1	1	603	1.8837001407519	0.00697718025185168				2	2	47	Startle	120	0.0591	2	46
																															1	1	1	604	1.88144213787746	0.00762232393026352				2	2	48	PrePulse	86	0	2	48
																															1	1	1	605	1.88079699419904	0.0072997520910576				2	2	48	Startle	120	0.0617	2	48
																															1	1	1	606	1.8782164194854	0.00697718025185168				2	2	56	PrePulse	86	0	2	45
																															1	1	1	607	1.88111956603825	0.00794489576946944				2	2	56	Startle	120	0.0381	2	45
																															1	1	1	608	1.88144213787746	0.0072997520910576				2	2	57	PrePulse	86	0	2	50
																															1	1	1	609	1.8785389913246	0.00665460841264576				2	2	57	Startle	120	0.0330	2	50
																															1	1	1	610	1.87692613212857	0.0072997520910576
																															1	1	1	611	1.87724870396778	0.00665460841264576				ASRc
																															1	1	1	612	1.88144213787746	0.0072997520910576				Chamber	Block ID	Trial ID	Period	Decibel	PeakVal	BlockId0	TrialId0
																															1	1	1	613	1.87918413500302	0.0072997520910576				2	2	4	Startle	120	0.2852	2	17
																															1	1	1	614	1.88015185052063	0.00697718025185168				2	2	9	Startle	120	0.3868	2	14
																															1	1	1	615	1.87950670684222	0.00697718025185168				2	2	12	Startle	120	0.3517	2	11
																															1	1	1	616	1.88692585914396	0.00697718025185168				2	2	18	Startle	120	0.5039	2	13
																															1	1	1	617	1.88466785626952	0.00697718025185168				2	2	25	Startle	120	0.2833	2	18
																															1	1	1	618	1.88563557178713	0.00826746760867536				2	2	43	Startle	120	0.4371	2	19
																															1	1	1	619	1.88273242523428	0.00665460841264576				2	2	46	Startle	120	0.5100	2	15
																															1	1	1	620	1.88595814362634	0.0072997520910576				2	2	50	Startle	120	0.3768	2	12
																															1	1	1	621	1.88595814362634	0.00697718025185168				2	2	51	Startle	120	0.3920	2	20
																															1	1	1	622	1.88305499707349	0.00697718025185168				2	2	53	Startle	120	0.4252	2	16
																															1	1	1	623	1.87982927868143	0.0072997520910576
																															1	1	1	624	1.88144213787746	0.00665460841264576				PPI Pct
																															1	1	1	625	1.88273242523428	0.0072997520910576				Chamber	Type	Details	Result
																															1	1	1	626	1.88176470971666	0.00794489576946944				2	ASRp	((0.0088 +0.0310 +0.0404 +0.0349 +0.0697 +0.0613 +0.0591 +0.0617 +0.0381 +0.0330)/10)*100	4.3800
																															1	1	1	627	1.88047442235984	0.00762232393026352				2	ASRc	((0.2852 +0.3868 +0.3517 +0.5039 +0.2833 +0.4371 +0.5100 +0.3768 +0.3920 +0.4252)/10)*100	39.5200
																															1	1	1	628	1.8782164194854	0.0072997520910576				2	PPI Pct	(ASRc - ASRp)/ASRc	88.9170
																															1	1	1	629	1.88208728155587	0.00697718025185168
																															1	1	1	630	1.88208728155587	0.0072997520910576				ASRp
																															1	1	1	631	1.87918413500302	0.00697718025185168				Chamber	Block ID	Trial ID	Period	Decibel	AvgVal	BlockId0	TrialId0
																															1	1	1	632	1.8782164194854	0.0072997520910576				2	2	1	PrePulse	74	0	2	30
																															1	1	1	633	1.87595841661096	0.00762232393026352				2	2	1	Startle	120	-0.0001	2	30
																															1	1	1	634	1.88111956603825	0.0072997520910576				2	2	2	PrePulse	74	0	2	25
																															1	1	1	635	1.8782164194854	0.00697718025185168				2	2	2	Startle	120	-0.0038	2	25
																															1	1	1	636	1.87789384764619	0.00762232393026352				2	2	3	PrePulse	74	0	2	28
																															1	1	1	637	1.87692613212857	0.00762232393026352				2	2	3	Startle	120	-0.0030	2	28
																															1	1	1	638	1.88305499707349	0.00697718025185168				2	2	7	PrePulse	74	0	2	22
																															1	1	1	639	1.88111956603825	0.0072997520910576				2	2	7	Startle	120	-0.0043	2	22
																															1	1	1	640	1.88305499707349	0.00697718025185168				2	2	11	PrePulse	74	0	2	27
																															1	1	1	641	1.87982927868143	0.00697718025185168				2	2	11	Startle	120	0.0000	2	27
																															1	1	1	642	1.88273242523428	0.0072997520910576				2	2	24	PrePulse	74	0	2	24
																															1	1	1	643	1.8837001407519	0.0072997520910576				2	2	24	Startle	120	0.0005	2	24
																															1	1	1	644	1.88273242523428	0.0072997520910576				2	2	26	PrePulse	74	0	2	29
																															1	1	1	645	1.88015185052063	0.0072997520910576				2	2	26	Startle	120	-0.0030	2	29
																															1	1	1	646	1.87918413500302	0.00697718025185168				2	2	28	PrePulse	74	0	2	26
																															1	1	1	647	1.8840227125911	0.0072997520910576				2	2	28	Startle	120	-0.0046	2	26
																															1	1	1	648	1.88273242523428	0.00633203657343984				2	2	40	PrePulse	74	0	2	23
																															1	1	1	649	1.88015185052063	0.00762232393026352				2	2	40	Startle	120	0.0019	2	23
																															1	1	1	650	1.8785389913246	0.00762232393026352				2	2	59	PrePulse	74	0	2	21
																															1	1	1	651	1.87724870396778	0.0072997520910576				2	2	59	Startle	120	0.0009	2	21
																															1	1	1	652	1.88337756891269	0.0072997520910576
																															1	1	1	653	1.88015185052063	0.00794489576946944				ASRc
																															1	1	1	654	1.87982927868143	0.0072997520910576				Chamber	Block ID	Trial ID	Period	Decibel	AvgVal	BlockId0	TrialId0
																															1	1	1	655	1.8785389913246	0.00762232393026352				2	2	4	Startle	120	0.0014	2	17
																															1	1	1	656	1.88337756891269	0.00794489576946944				2	2	9	Startle	120	0.0021	2	14
																															1	1	1	657	1.88047442235984	0.0072997520910576				2	2	12	Startle	120	-0.0055	2	11
																															1	1	1	658	1.88208728155587	0.00762232393026352				2	2	18	Startle	120	0.0000	2	13
																															1	1	1	659	1.87724870396778	0.0072997520910576				2	2	25	Startle	120	-0.0110	2	18
																															1	1	1	660	1.88240985339507	0.00665460841264576				2	2	43	Startle	120	-0.0036	2	19
																															1	1	1	661	1.88144213787746	0.0072997520910576				2	2	46	Startle	120	-0.0066	2	15
																															1	1	1	662	1.88176470971666	0.00665460841264576				2	2	50	Startle	120	0.0032	2	12
																															1	1	1	663	1.87982927868143	0.0072997520910576				2	2	51	Startle	120	-0.0045	2	20
																															1	1	1	664	1.88176470971666	0.0072997520910576				2	2	53	Startle	120	-0.0007	2	16
																															1	1	1	665	1.88466785626952	0.00697718025185168
																															1	1	1	666	1.88305499707349	0.00762232393026352				PPI Pct
																															1	1	1	667	1.87950670684222	0.00697718025185168				Chamber	Type	Details	Result
																															1	1	1	668	1.88047442235984	0.00697718025185168				2	ASRp	((-0.0001 +-0.0038 +-0.0030 +-0.0043 +0.0000 +0.0005 +-0.0030 +-0.0046 +0.0019 +0.0009)/10)*100	-0.1550
																															1	1	1	669	1.88273242523428	0.0072997520910576				2	ASRc	((0.0014 +0.0021 +-0.0055 +0.0000 +-0.0110 +-0.0036 +-0.0066 +0.0032 +-0.0045 +-0.0007)/10)*100	-0.2520
																															1	1	1	670	1.88240985339507	0.00697718025185168				2	PPI Pct	(ASRc - ASRp)/ASRc	38.4921
																															1	1	1	671	1.87950670684222	0.00697718025185168
																															1	1	1	672	1.87950670684222	0.00600946473423392				ASRp
																															1	1	1	673	1.87660356028937	0.0072997520910576				Chamber	Block ID	Trial ID	Period	Decibel	AvgVal	BlockId0	TrialId0
																															1	1	1	674	1.88273242523428	0.0072997520910576				2	2	5	PrePulse	78	0	2	34
																															1	1	1	675	1.87950670684222	0.0072997520910576				2	2	5	Startle	120	-0.0074	2	34
																															1	1	1	676	1.88176470971666	0.00633203657343984				2	2	6	PrePulse	78	0	2	35
																															1	1	1	677	1.87757127580699	0.0072997520910576				2	2	6	Startle	120	-0.0065	2	35
																															1	1	1	678	1.88499042810872	0.00697718025185168				2	2	16	PrePulse	78	0	2	31
																															1	1	1	679	1.88305499707349	0.0072997520910576				2	2	16	Startle	120	-0.0010	2	31
																															1	1	1	680	1.88499042810872	0.00762232393026352				2	2	19	PrePulse	78	0	2	40
																															1	1	1	681	1.88144213787746	0.00762232393026352				2	2	19	Startle	120	-0.0011	2	40
																															1	1	1	682	1.88337756891269	0.00762232393026352				2	2	20	PrePulse	78	0	2	33
																															1	1	1	683	1.8837001407519	0.00697718025185168				2	2	20	Startle	120	-0.0050	2	33
																															1	1	1	684	1.88499042810872	0.0072997520910576				2	2	29	PrePulse	78	0	2	36
																															1	1	1	685	1.88015185052063	0.00762232393026352				2	2	29	Startle	120	-0.0020	2	36
																															1	1	1	686	1.88176470971666	0.0072997520910576				2	2	30	PrePulse	78	0	2	38
																															1	1	1	687	1.88499042810872	0.00762232393026352				2	2	30	Startle	120	-0.0032	2	38
																															1	1	1	688	1.88499042810872	0.00794489576946944				2	2	33	PrePulse	78	0	2	39
																															1	1	1	689	1.88144213787746	0.0072997520910576				2	2	33	Startle	120	-0.0048	2	39
																															1	1	1	690	1.88111956603825	0.00794489576946944				2	2	44	PrePulse	78	0	2	32
																															1	1	1	691	1.88240985339507	0.00762232393026352				2	2	44	Startle	120	-0.0043	2	32
																															1	1	1	692	1.88273242523428	0.00762232393026352				2	2	55	PrePulse	78	0	2	37
																															1	1	1	693	1.8782164194854	0.00762232393026352				2	2	55	Startle	120	-0.0040	2	37
																															1	1	1	694	1.87918413500302	0.0072997520910576
																															1	1	1	695	1.87531327293254	0.00633203657343984				ASRc
																															1	1	1	696	1.88176470971666	0.00697718025185168				Chamber	Block ID	Trial ID	Period	Decibel	AvgVal	BlockId0	TrialId0
																															1	1	1	697	1.8785389913246	0.00665460841264576				2	2	4	Startle	120	0.0014	2	17
																															1	1	1	698	1.88111956603825	0.0072997520910576				2	2	9	Startle	120	0.0021	2	14
																															1	1	1	699	1.87757127580699	0.0072997520910576				2	2	12	Startle	120	-0.0055	2	11
																															1	1	1	700	1.8837001407519	0.00697718025185168				2	2	18	Startle	120	0.0000	2	13
																															1	1	1	701	1.88111956603825	0.00665460841264576				2	2	25	Startle	120	-0.0110	2	18
																															1	1	1	702	1.88273242523428	0.00697718025185168				2	2	43	Startle	120	-0.0036	2	19
																															1	1	1	703	1.87789384764619	0.0072997520910576				2	2	46	Startle	120	-0.0066	2	15
																															1	1	1	704	1.88111956603825	0.00697718025185168				2	2	50	Startle	120	0.0032	2	12
																															1	1	1	705	1.88176470971666	0.00697718025185168				2	2	51	Startle	120	-0.0045	2	20
																															1	1	1	706	1.88047442235984	0.00762232393026352				2	2	53	Startle	120	-0.0007	2	16
																															1	1	1	707	1.87789384764619	0.00633203657343984
																															1	1	1	708	1.8785389913246	0.0072997520910576				PPI Pct
																															1	1	1	709	1.88079699419904	0.0072997520910576				Chamber	Type	Details	Result
																															1	1	1	710	1.88079699419904	0.00633203657343984				2	ASRp	((-0.0074 +-0.0065 +-0.0010 +-0.0011 +-0.0050 +-0.0020 +-0.0032 +-0.0048 +-0.0043 +-0.0040)/10)*100	-0.3930
																															1	1	1	711	1.8782164194854	0.0072997520910576				2	ASRc	((0.0014 +0.0021 +-0.0055 +0.0000 +-0.0110 +-0.0036 +-0.0066 +0.0032 +-0.0045 +-0.0007)/10)*100	-0.2520
																															1	1	1	712	1.8782164194854	0.0072997520910576				2	PPI Pct	(ASRc - ASRp)/ASRc	-55.9524
																															1	1	1	713	1.87757127580699	0.00697718025185168
																															1	1	1	714	1.88240985339507	0.00697718025185168				ASRp
																															1	1	1	715	1.88015185052063	0.00697718025185168				Chamber	Block ID	Trial ID	Period	Decibel	AvgVal	BlockId0	TrialId0
																															1	1	1	716	1.88015185052063	0.0072997520910576				2	2	13	PrePulse	86	0	2	43
																															1	1	1	717	1.8785389913246	0.0072997520910576				2	2	13	Startle	120	-0.0070	2	43
																															1	1	1	718	1.8840227125911	0.0072997520910576				2	2	17	PrePulse	86	0	2	41
																															1	1	1	719	1.88111956603825	0.0072997520910576				2	2	17	Startle	120	-0.0073	2	41
																															1	1	1	720	1.8837001407519	0.0072997520910576				2	2	21	PrePulse	86	0	2	49
																															1	1	1	721	1.88047442235984	0.0072997520910576				2	2	21	Startle	120	-0.0101	2	49
																															1	1	1	722	1.88466785626952	0.00762232393026352				2	2	23	PrePulse	86	0	2	44
																															1	1	1	723	1.8840227125911	0.0072997520910576				2	2	23	Startle	120	-0.0027	2	44
																															1	1	1	724	1.8840227125911	0.00762232393026352				2	2	31	PrePulse	86	0	2	42
																															1	1	1	725	1.88047442235984	0.00794489576946944				2	2	31	Startle	120	-0.0070	2	42
																															1	1	1	726	1.88015185052063	0.0072997520910576				2	2	32	PrePulse	86	0	2	47
																															1	1	1	727	1.88240985339507	0.00697718025185168				2	2	32	Startle	120	-0.0009	2	47
																															1	1	1	728	1.88208728155587	0.00762232393026352				2	2	47	PrePulse	86	0	2	46
																															1	1	1	729	1.87918413500302	0.0072997520910576				2	2	47	Startle	120	-0.0064	2	46
																															1	1	1	730	1.87982927868143	0.0072997520910576				2	2	48	PrePulse	86	0	2	48
																															1	1	1	731	1.88047442235984	0.0072997520910576				2	2	48	Startle	120	-0.0007	2	48
																															1	1	1	732	1.88240985339507	0.0072997520910576				2	2	56	PrePulse	86	0	2	45
																															1	1	1	733	1.88015185052063	0.0072997520910576				2	2	56	Startle	120	-0.0016	2	45
																															1	1	1	734	1.87982927868143	0.00633203657343984				2	2	57	PrePulse	86	0	2	50
																															1	1	1	735	1.87918413500302	0.00600946473423392				2	2	57	Startle	120	-0.0050	2	50
																															1	1	1	736	1.88499042810872	0.0072997520910576
																															1	1	1	737	1.88111956603825	0.00697718025185168				ASRc
																															1	1	1	738	1.88208728155587	0.00794489576946944				Chamber	Block ID	Trial ID	Period	Decibel	AvgVal	BlockId0	TrialId0
																															1	1	1	739	1.8782164194854	0.00762232393026352				2	2	4	Startle	120	0.0014	2	17
																															1	1	1	740	1.88466785626952	0.00762232393026352				2	2	9	Startle	120	0.0021	2	14
																															1	1	1	741	1.88176470971666	0.00762232393026352				2	2	12	Startle	120	-0.0055	2	11
																															1	1	1	742	1.88305499707349	0.0072997520910576				2	2	18	Startle	120	0.0000	2	13
																															1	1	1	743	1.87982927868143	0.00665460841264576				2	2	25	Startle	120	-0.0110	2	18
																															1	1	1	744	1.8837001407519	0.0072997520910576				2	2	43	Startle	120	-0.0036	2	19
																															1	1	1	745	1.88273242523428	0.00697718025185168				2	2	46	Startle	120	-0.0066	2	15
																															1	1	1	746	1.8840227125911	0.00762232393026352				2	2	50	Startle	120	0.0032	2	12
																															1	1	1	747	1.87982927868143	0.00697718025185168				2	2	51	Startle	120	-0.0045	2	20
																															1	1	1	748	1.88144213787746	0.00633203657343984				2	2	53	Startle	120	-0.0007	2	16
																															1	1	1	749	1.88273242523428	0.00665460841264576
																															1	1	1	750	1.8837001407519	0.00665460841264576				PPI Pct
																															1	1	1	751	1.88176470971666	0.00762232393026352				Chamber	Type	Details	Result
																															1	1	1	752	1.88434528443031	0.00697718025185168				2	ASRp	((-0.0070 +-0.0073 +-0.0101 +-0.0027 +-0.0070 +-0.0009 +-0.0064 +-0.0007 +-0.0016 +-0.0050)/10)*100	-0.4870
																															1	1	1	753	1.88595814362634	0.00633203657343984				2	ASRc	((0.0014 +0.0021 +-0.0055 +0.0000 +-0.0110 +-0.0036 +-0.0066 +0.0032 +-0.0045 +-0.0007)/10)*100	-0.2520
																															1	1	1	754	1.89757072983775	0.0072997520910576				2	PPI Pct	(ASRc - ASRp)/ASRc	-93.2540
																															1	1	1	755	1.90047387639061	0.00762232393026352
																															1	1	1	756	1.91273160628043	0.00794489576946944				ASRp
																															1	1	1	757	1.91724761202931	0.0072997520910576				Chamber	Block ID	Trial ID	Period	Decibel	RmsVal	BlockId0	TrialId0
																															1	1	1	758	1.93627935054246	0.0072997520910576				2	2	1	PrePulse	74	0	2	30
																															1	1	1	759	1.94208564364817	0.0072997520910576				2	2	1	Startle	120	0.0742	2	30
																															1	1	1	760	1.95208537066355	0.0072997520910576				2	2	2	PrePulse	74	0	2	25
																															1	1	1	761	1.95176279882435	0.00665460841264576				2	2	2	Startle	120	0.0521	2	25
																															1	1	1	762	1.95595623273402	0.0072997520910576				2	2	3	PrePulse	74	0	2	28
																															1	1	1	763	1.95047251146752	0.00762232393026352				2	2	3	Startle	120	0.0902	2	28
																															1	1	1	764	1.94724679307546	0.00762232393026352				2	2	7	PrePulse	74	0	2	22
																															1	1	1	765	1.93079562927596	0.00762232393026352				2	2	7	Startle	120	0.0390	2	22
																															1	1	1	766	1.92337647697423	0.0089126112870872				2	2	11	PrePulse	74	0	2	27
																															1	1	1	767	1.91466703731567	0.00665460841264576				2	2	11	Startle	120	0.0459	2	27
																															1	1	1	768	1.90918331604917	0.00697718025185168				2	2	24	PrePulse	74	0	2	24
																															1	1	1	769	1.89692558615934	0.00762232393026352				2	2	24	Startle	120	0.1266	2	24
																															1	1	1	770	1.89047414937522	0.00697718025185168				2	2	26	PrePulse	74	0	2	29
																															1	1	1	771	1.88208728155587	0.0072997520910576				2	2	26	Startle	120	0.0408	2	29
																															1	1	1	772	1.87789384764619	0.00697718025185168				2	2	28	PrePulse	74	0	2	26
																															1	1	1	773	1.8620878275251	0.00794489576946944				2	2	28	Startle	120	0.0799	2	26
																															1	1	1	774	1.85563639074098	0.00826746760867536				2	2	40	PrePulse	74	0	2	23
																															1	1	1	775	1.84499152004719	0.0072997520910576				2	2	40	Startle	120	0.0866	2	23
																															1	1	1	776	1.84853981027845	0.00762232393026352				2	2	59	PrePulse	74	0	2	21
																															1	1	1	777	1.84176580165513	0.00697718025185168				2	2	59	Startle	120	0.0821	2	21
																															1	1	1	778	1.84434637636878	0.00665460841264576
																															1	1	1	779	1.8404755142983	0.00762232393026352				ASRc
																															1	1	1	780	1.84983009763528	0.0072997520910576				Chamber	Block ID	Trial ID	Period	Decibel	RmsVal	BlockId0	TrialId0
																															1	1	1	781	1.84466894820798	0.0072997520910576				2	2	4	Startle	120	0.1252	2	17
																															1	1	1	782	1.84466894820798	0.00697718025185168				2	2	9	Startle	120	0.1395	2	14
																															1	1	1	783	1.8349917930318	0.0072997520910576				2	2	12	Startle	120	0.1366	2	11
																															1	1	1	784	1.83660465222783	0.00762232393026352				2	2	18	Startle	120	0.1987	2	13
																															1	1	1	785	1.83337893383577	0.00762232393026352				2	2	25	Startle	120	0.1366	2	18
																															1	1	1	786	1.83208864647895	0.00697718025185168				2	2	43	Startle	120	0.1618	2	19
																															1	1	1	787	1.8291854999261	0.00665460841264576				2	2	46	Startle	120	0.2285	2	15
																															1	1	1	788	1.83047578728292	0.0072997520910576				2	2	50	Startle	120	0.1429	2	12
																															1	1	1	789	1.8349917930318	0.0072997520910576				2	2	51	Startle	120	0.1466	2	20
																															1	1	1	790	1.83918522694148	0.0072997520910576				2	2	53	Startle	120	0.1531	2	16
																															1	1	1	791	1.83757236774545	0.00697718025185168
																															1	1	1	792	1.84144322981592	0.00762232393026352				PPI Pct
																															1	1	1	793	1.84692695108242	0.0072997520910576				Chamber	Type	Details	Result
																															1	1	1	794	1.85531381890178	0.0072997520910576				2	ASRp	((0.0742 +0.0521 +0.0902 +0.0390 +0.0459 +0.1266 +0.0408 +0.0799 +0.0866 +0.0821)/10)*100	7.1740
																															1	1	1	795	1.85886210913304	0.00697718025185168				2	ASRc	((0.1252 +0.1395 +0.1366 +0.1987 +0.1366 +0.1618 +0.2285 +0.1429 +0.1466 +0.1531)/10)*100	15.6950
																															1	1	1	796	1.86660383327398	0.00762232393026352				2	PPI Pct	(ASRc - ASRp)/ASRc	54.2912
																															1	1	1	797	1.8727326982189	0.00697718025185168
																															1	1	1	798	1.88208728155587	0.00697718025185168				ASRp
																															1	1	1	799	1.88144213787746	0.0072997520910576				Chamber	Block ID	Trial ID	Period	Decibel	RmsVal	BlockId0	TrialId0
																															1	1	1	800	1.88466785626952	0.0072997520910576				2	2	5	PrePulse	78	0	2	34
																															1	1	1	801	1.88015185052063	0.00697718025185168				2	2	5	Startle	120	0.0400	2	34
																															1	1	1	802	1.88628071546555	0.0072997520910576				2	2	6	PrePulse	78	0	2	35
																															1	1	1	803	1.88305499707349	0.0072997520910576				2	2	6	Startle	120	0.0749	2	35
																															1	1	1	804	1.8840227125911	0.0072997520910576				2	2	16	PrePulse	78	0	2	31
																															1	1	1	805	1.88079699419904	0.00762232393026352				2	2	16	Startle	120	0.1051	2	31
																															1	1	1	806	1.88466785626952	0.00762232393026352				2	2	19	PrePulse	78	0	2	40
																															1	1	1	807	1.8837001407519	0.0072997520910576				2	2	19	Startle	120	0.0441	2	40
																															1	1	1	808	1.88273242523428	0.0072997520910576				2	2	20	PrePulse	78	0	2	33
																															1	1	1	809	1.87628098845016	0.00762232393026352				2	2	20	Startle	120	0.0786	2	33
																															1	1	1	810	1.87434555741493	0.0072997520910576				2	2	29	PrePulse	78	0	2	36
																															1	1	1	811	1.87595841661096	0.0072997520910576				2	2	29	Startle	120	0.1190	2	36
																															1	1	1	812	1.87724870396778	0.00697718025185168				2	2	30	PrePulse	78	0	2	38
																															1	1	1	813	1.87660356028937	0.00697718025185168				2	2	30	Startle	120	0.0942	2	38
																															1	1	1	814	1.87918413500302	0.0072997520910576				2	2	33	PrePulse	78	0	2	39
																															1	1	1	815	1.8785389913246	0.0072997520910576				2	2	33	Startle	120	0.1044	2	39
																															1	1	1	816	1.8891838620184	0.0072997520910576				2	2	44	PrePulse	78	0	2	32
																															1	1	1	817	1.88628071546555	0.00665460841264576				2	2	44	Startle	120	0.0844	2	32
																															1	1	1	818	1.88757100282237	0.0072997520910576				2	2	55	PrePulse	78	0	2	37
																															1	1	1	819	1.88273242523428	0.00762232393026352				2	2	55	Startle	120	0.0334	2	37
																															1	1	1	820	1.8891838620184	0.00697718025185168
																															1	1	1	821	1.88499042810872	0.0072997520910576				ASRc
																															1	1	1	822	1.88628071546555	0.00600946473423392				Chamber	Block ID	Trial ID	Period	Decibel	RmsVal	BlockId0	TrialId0
																															1	1	1	823	1.88176470971666	0.0072997520910576				2	2	4	Startle	120	0.1252	2	17
																															1	1	1	824	1.88789357466158	0.0072997520910576				2	2	9	Startle	120	0.1395	2	14
																															1	1	1	825	1.88466785626952	0.0072997520910576				2	2	12	Startle	120	0.1366	2	11
																															1	1	1	826	1.88563557178713	0.00697718025185168				2	2	18	Startle	120	0.1987	2	13
																															1	1	1	827	1.8785389913246	0.00633203657343984				2	2	25	Startle	120	0.1366	2	18
																															1	1	1	828	1.87950670684222	0.0072997520910576				2	2	43	Startle	120	0.1618	2	19
																															1	1	1	829	1.88047442235984	0.0072997520910576				2	2	46	Startle	120	0.2285	2	15
																															1	1	1	830	1.88240985339507	0.0072997520910576				2	2	50	Startle	120	0.1429	2	12
																															1	1	1	831	1.87918413500302	0.0072997520910576				2	2	51	Startle	120	0.1466	2	20
																															1	1	1	832	1.88305499707349	0.00697718025185168				2	2	53	Startle	120	0.1531	2	16
																															1	1	1	833	1.88208728155587	0.00665460841264576
																															1	1	1	834	1.8891838620184	0.0072997520910576				PPI Pct
																															1	1	1	835	1.8837001407519	0.00762232393026352				Chamber	Type	Details	Result
																															1	1	1	836	1.88757100282237	0.00633203657343984				2	ASRp	((0.0400 +0.0749 +0.1051 +0.0441 +0.0786 +0.1190 +0.0942 +0.1044 +0.0844 +0.0334)/10)*100	7.7810
																															1	1	1	837	1.8840227125911	0.0072997520910576				2	ASRc	((0.1252 +0.1395 +0.1366 +0.1987 +0.1366 +0.1618 +0.2285 +0.1429 +0.1466 +0.1531)/10)*100	15.6950
																															1	1	1	838	1.89595787064172	0.0072997520910576				2	PPI Pct	(ASRc - ASRp)/ASRc	50.4237
																															1	1	1	839	1.89208700857125	0.00697718025185168
																															1	1	1	840	1.90079644822981	0.0072997520910576				ASRp
																															1	1	1	841	1.89563529880252	0.00794489576946944				Chamber	Block ID	Trial ID	Period	Decibel	RmsVal	BlockId0	TrialId0
																															1	1	1	842	1.90918331604917	0.00633203657343984				2	2	13	PrePulse	86	0	2	43
																															1	1	1	843	1.90176416374743	0.00697718025185168				2	2	13	Startle	120	0.0115	2	43
																															1	1	1	844	1.90628016949631	0.00762232393026352				2	2	17	PrePulse	86	0	2	41
																															1	1	1	845	1.89660301432014	0.00697718025185168				2	2	17	Startle	120	0.0170	2	41
																															1	1	1	846	1.90369959478267	0.0072997520910576				2	2	21	PrePulse	86	0	2	49
																															1	1	1	847	1.89595787064172	0.00697718025185168				2	2	21	Startle	120	0.0236	2	49
																															1	1	1	848	1.90305445110425	0.0072997520910576				2	2	23	PrePulse	86	0	2	44
																															1	1	1	849	1.89337729592808	0.00665460841264576				2	2	23	Startle	120	0.0165	2	44
																															1	1	1	850	1.90079644822981	0.00697718025185168				2	2	31	PrePulse	86	0	2	42
																															1	1	1	851	1.89724815799855	0.0072997520910576				2	2	31	Startle	120	0.0254	2	42
																															1	1	1	852	1.90369959478267	0.00697718025185168				2	2	32	PrePulse	86	0	2	47
																															1	1	1	853	1.89208700857125	0.0072997520910576				2	2	32	Startle	120	0.0286	2	47
																															1	1	1	854	1.8946675832849	0.00697718025185168				2	2	47	PrePulse	86	0	2	46
																															1	1	1	855	1.88724843098316	0.00697718025185168				2	2	47	Startle	120	0.0236	2	46
																															1	1	1	856	1.89079672121443	0.00794489576946944				2	2	48	PrePulse	86	0	2	48
																															1	1	1	857	1.88015185052063	0.00794489576946944				2	2	48	Startle	120	0.0237	2	48
																															1	1	1	858	1.88273242523428	0.00697718025185168				2	2	56	PrePulse	86	0	2	45
																															1	1	1	859	1.87402298557572	0.0072997520910576				2	2	56	Startle	120	0.0146	2	45
																															1	1	1	860	1.8840227125911	0.00697718025185168				2	2	57	PrePulse	86	0	2	50
																															1	1	1	861	1.87563584477175	0.00762232393026352				2	2	57	Startle	120	0.0195	2	50
																															1	1	1	862	1.8782164194854	0.0072997520910576
																															1	1	1	863	1.87208755454048	0.00762232393026352				ASRc
																															1	1	1	864	1.87918413500302	0.00762232393026352				Chamber	Block ID	Trial ID	Period	Decibel	RmsVal	BlockId0	TrialId0
																															1	1	1	865	1.8730552700581	0.0072997520910576				2	2	4	Startle	120	0.1252	2	17
																															1	1	1	866	1.87499070109334	0.00762232393026352				2	2	9	Startle	120	0.1395	2	14
																															1	1	1	867	1.86950697982684	0.0072997520910576				2	2	12	Startle	120	0.1366	2	11
																															1	1	1	868	1.87563584477175	0.00665460841264576				2	2	18	Startle	120	0.1987	2	13
																															1	1	1	869	1.87402298557572	0.0072997520910576				2	2	25	Startle	120	0.1366	2	18
																															1	1	1	870	1.87402298557572	0.00665460841264576				2	2	43	Startle	120	0.1618	2	19
																															1	1	1	871	1.87111983902287	0.0072997520910576				2	2	46	Startle	120	0.2285	2	15
																															1	1	1	872	1.86982955166604	0.0072997520910576				2	2	50	Startle	120	0.1429	2	12
																															1	1	1	873	1.87402298557572	0.00762232393026352				2	2	51	Startle	120	0.1466	2	20
																															1	1	1	874	1.87047469534446	0.00762232393026352				2	2	53	Startle	120	0.1531	2	16
																															1	1	1	875	1.86918440798763	0.00697718025185168
																															1	1	1	876	1.86595868959557	0.00665460841264576				PPI Pct
																															1	1	1	877	1.86821669247001	0.00536432105582207				Chamber	Type	Details	Result
																															1	1	1	878	1.86950697982684	0.0072997520910576				2	ASRp	((0.0115 +0.0170 +0.0236 +0.0165 +0.0254 +0.0286 +0.0236 +0.0237 +0.0146 +0.0195)/10)*100	2.0400
																															1	1	1	879	1.86950697982684	0.00665460841264576				2	ASRc	((0.1252 +0.1395 +0.1366 +0.1987 +0.1366 +0.1618 +0.2285 +0.1429 +0.1466 +0.1531)/10)*100	15.6950
																															1	1	1	880	1.86595868959557	0.00665460841264576				2	PPI Pct	(ASRc - ASRp)/ASRc	87.0022
																															1	1	1	881	1.8672489769524	0.00697718025185168
																															1	1	1	882	1.87144241086207	0.00697718025185168				ASRp
																															1	1	1	883	1.8727326982189	0.0072997520910576				Chamber	Block ID	Trial ID	Period	Decibel	StdevVal	BlockId0	TrialId0
																															1	1	1	884	1.87015212350525	0.00697718025185168				2	2	1	PrePulse	74	0	2	30
																															1	1	1	885	1.87015212350525	0.0072997520910576				2	2	1	Startle	120	0.0745	2	30
																															1	1	1	886	1.87692613212857	0.00697718025185168				2	2	2	PrePulse	74	0	2	25
																															1	1	1	887	1.8782164194854	0.00697718025185168				2	2	2	Startle	120	0.0522	2	25
																															1	1	1	888	1.87918413500302	0.00697718025185168				2	2	3	PrePulse	74	0	2	28
																															1	1	1	889	1.88144213787746	0.00762232393026352				2	2	3	Startle	120	0.0906	2	28
																															1	1	1	890	1.88434528443031	0.0072997520910576				2	2	7	PrePulse	74	0	2	22
																															1	1	1	891	1.8891838620184	0.00762232393026352				2	2	7	Startle	120	0.0390	2	22
																															1	1	1	892	1.88789357466158	0.0072997520910576				2	2	11	PrePulse	74	0	2	27
																															1	1	1	893	1.88628071546555	0.00762232393026352				2	2	11	Startle	120	0.0461	2	27
																															1	1	1	894	1.88240985339507	0.0072997520910576				2	2	24	PrePulse	74	0	2	24
																															1	1	1	895	1.88724843098316	0.00762232393026352				2	2	24	Startle	120	0.1272	2	24
																															1	1	1	896	1.8837001407519	0.0072997520910576				2	2	26	PrePulse	74	0	2	29
																															1	1	1	897	1.88111956603825	0.00762232393026352				2	2	26	Startle	120	0.0409	2	29
																															1	1	1	898	1.87789384764619	0.00794489576946944				2	2	28	PrePulse	74	0	2	26
																															1	1	1	899	1.88434528443031	0.00762232393026352				2	2	28	Startle	120	0.0802	2	26
																															1	1	1	900	1.88305499707349	0.00665460841264576				2	2	40	PrePulse	74	0	2	23
																															1	1	1	901	1.88466785626952	0.0072997520910576				2	2	40	Startle	120	0.0870	2	23
																															1	1	1	902	1.88240985339507	0.00633203657343984				2	2	59	PrePulse	74	0	2	21
																															1	1	1	903	1.88466785626952	0.00697718025185168				2	2	59	Startle	120	0.0825	2	21
																															1	1	1	904	1.88789357466158	0.00826746760867536
																															1	1	1	905	1.88660328730475	0.00697718025185168				ASRc
																															1	1	1	906	1.8837001407519	0.00697718025185168				Chamber	Block ID	Trial ID	Period	Decibel	StdevVal	BlockId0	TrialId0
																															1	1	1	907	1.8837001407519	0.0072997520910576				2	2	4	Startle	120	0.1258	2	17
																															1	1	1	908	1.88757100282237	0.00762232393026352				2	2	9	Startle	120	0.1401	2	14
																															1	1	1	909	1.88724843098316	0.00665460841264576				2	2	12	Startle	120	0.1372	2	11
																															1	1	1	910	1.88466785626952	0.00665460841264576				2	2	18	Startle	120	0.1997	2	13
																															1	1	1	911	1.88273242523428	0.00697718025185168				2	2	25	Startle	120	0.1368	2	18
																															1	1	1	912	1.88757100282237	0.0072997520910576				2	2	43	Startle	120	0.1626	2	19
																															1	1	1	913	1.88757100282237	0.00697718025185168				2	2	46	Startle	120	0.2295	2	15
																															1	1	1	914	1.88337756891269	0.0072997520910576				2	2	50	Startle	120	0.1436	2	12
																															1	1	1	915	1.88240985339507	0.00697718025185168				2	2	51	Startle	120	0.1473	2	20
																															1	1	1	916	1.87950670684222	0.0072997520910576				2	2	53	Startle	120	0.1539	2	16
																															1	1	1	917	1.88305499707349	0.0072997520910576
																															1	1	1	918	1.87982927868143	0.00762232393026352				PPI Pct
																															1	1	1	919	1.87886156316381	0.0072997520910576				Chamber	Type	Details	Result
																															1	1	1	920	1.87595841661096	0.0072997520910576				2	ASRp	((0.0745 +0.0522 +0.0906 +0.0390 +0.0461 +0.1272 +0.0409 +0.0802 +0.0870 +0.0825)/10)*100	7.2020
																															1	1	1	921	1.88111956603825	0.0072997520910576				2	ASRc	((0.1258 +0.1401 +0.1372 +0.1997 +0.1368 +0.1626 +0.2295 +0.1436 +0.1473 +0.1539)/10)*100	15.7650
																															1	1	1	922	1.88240985339507	0.00697718025185168				2	PPI Pct	(ASRc - ASRp)/ASRc	54.3165
																															1	1	1	923	1.88337756891269	0.00697718025185168
																															1	1	1	924	1.88111956603825	0.00859003944788128				ASRp
																															1	1	1	925	1.88466785626952	0.005686892895028				Chamber	Block ID	Trial ID	Period	Decibel	StdevVal	BlockId0	TrialId0
																															1	1	1	926	1.88692585914396	0.0072997520910576				2	2	5	PrePulse	78	0	2	34
																															1	1	1	927	1.88628071546555	0.00762232393026352				2	2	5	Startle	120	0.0395	2	34
																															1	1	1	928	1.88273242523428	0.00697718025185168				2	2	6	PrePulse	78	0	2	35
																															1	1	1	929	1.88176470971666	0.00697718025185168				2	2	6	Startle	120	0.0750	2	35
																															1	1	1	930	1.88466785626952	0.0072997520910576				2	2	16	PrePulse	78	0	2	31
																															1	1	1	931	1.88499042810872	0.00762232393026352				2	2	16	Startle	120	0.1056	2	31
																															1	1	1	932	1.88240985339507	0.00633203657343984				2	2	19	PrePulse	78	0	2	40
																															1	1	1	933	1.88305499707349	0.0072997520910576				2	2	19	Startle	120	0.0443	2	40
																															1	1	1	934	1.88563557178713	0.00697718025185168				2	2	20	PrePulse	78	0	2	33
																															1	1	1	935	1.89015157753602	0.00762232393026352				2	2	20	Startle	120	0.0788	2	33
																															1	1	1	936	1.88563557178713	0.00762232393026352				2	2	29	PrePulse	78	0	2	36
																															1	1	1	937	1.88466785626952	0.00697718025185168				2	2	29	Startle	120	0.1196	2	36
																															1	1	1	938	1.88111956603825	0.00665460841264576				2	2	30	PrePulse	78	0	2	38
																															1	1	1	939	1.88434528443031	0.00762232393026352				2	2	30	Startle	120	0.0946	2	38
																															1	1	1	940	1.87982927868143	0.0072997520910576				2	2	33	PrePulse	78	0	2	39
																															1	1	1	941	1.87886156316381	0.00665460841264576				2	2	33	Startle	120	0.1048	2	39
																															1	1	1	942	1.87434555741493	0.0072997520910576				2	2	44	PrePulse	78	0	2	32
																															1	1	1	943	1.88240985339507	0.0072997520910576				2	2	44	Startle	120	0.0847	2	32
																															1	1	1	944	1.87918413500302	0.00697718025185168				2	2	55	PrePulse	78	0	2	37
																															1	1	1	945	1.88208728155587	0.0072997520910576				2	2	55	Startle	120	0.0333	2	37
																															1	1	1	946	1.87789384764619	0.00697718025185168
																															1	1	1	947	1.88208728155587	0.0072997520910576				ASRc
																															1	1	1	948	1.88144213787746	0.00697718025185168				Chamber	Block ID	Trial ID	Period	Decibel	StdevVal	BlockId0	TrialId0
																															1	1	1	949	1.88176470971666	0.00826746760867536				2	2	4	Startle	120	0.1258	2	17
																															1	1	1	950	1.87724870396778	0.00762232393026352				2	2	9	Startle	120	0.1401	2	14
																															1	1	1	951	1.87789384764619	0.00762232393026352				2	2	12	Startle	120	0.1372	2	11
																															1	1	1	952	1.88015185052063	0.0072997520910576				2	2	18	Startle	120	0.1997	2	13
																															1	1	1	953	1.88144213787746	0.0072997520910576				2	2	25	Startle	120	0.1368	2	18
																															1	1	1	954	1.8785389913246	0.00665460841264576				2	2	43	Startle	120	0.1626	2	19
																															1	1	1	955	1.87886156316381	0.00665460841264576				2	2	46	Startle	120	0.2295	2	15
																															1	1	1	956	1.88144213787746	0.0072997520910576				2	2	50	Startle	120	0.1436	2	12
																															1	1	1	957	1.8840227125911	0.00697718025185168				2	2	51	Startle	120	0.1473	2	20
																															1	1	1	958	1.87982927868143	0.00633203657343984				2	2	53	Startle	120	0.1539	2	16
																															1	1	1	959	1.88047442235984	0.0072997520910576
																															1	1	1	960	1.87789384764619	0.00697718025185168				PPI Pct
																															1	1	1	961	1.88499042810872	0.00697718025185168				Chamber	Type	Details	Result
																															1	1	1	962	1.87950670684222	0.00697718025185168				2	ASRp	((0.0395 +0.0750 +0.1056 +0.0443 +0.0788 +0.1196 +0.0946 +0.1048 +0.0847 +0.0333)/10)*100	7.8020
																															1	1	1	963	1.87982927868143	0.0072997520910576				2	ASRc	((0.1258 +0.1401 +0.1372 +0.1997 +0.1368 +0.1626 +0.2295 +0.1436 +0.1473 +0.1539)/10)*100	15.7650
																															1	1	1	964	1.87628098845016	0.00697718025185168				2	PPI Pct	(ASRc - ASRp)/ASRc	50.5106
																															1	1	1	965	1.88208728155587	0.00697718025185168
																															1	1	1	966	1.87918413500302	0.0072997520910576				ASRp
																															1	1	1	967	1.88079699419904	0.00762232393026352				Chamber	Block ID	Trial ID	Period	Decibel	StdevVal	BlockId0	TrialId0
																															1	1	1	968	1.87595841661096	0.00826746760867536				2	2	13	PrePulse	86	0	2	43
																															1	1	1	969	1.88144213787746	0.0072997520910576				2	2	13	Startle	120	0.0092	2	43
																															1	1	1	970	1.87918413500302	0.00665460841264576				2	2	17	PrePulse	86	0	2	41
																															1	1	1	971	1.88047442235984	0.0072997520910576				2	2	17	Startle	120	0.0155	2	41
																															1	1	1	972	1.87563584477175	0.0072997520910576				2	2	21	PrePulse	86	0	2	49
																															1	1	1	973	1.87466812925413	0.00697718025185168				2	2	21	Startle	120	0.0215	2	49
																															1	1	1	974	1.87660356028937	0.00794489576946944				2	2	23	PrePulse	86	0	2	44
																															1	1	1	975	1.87531327293254	0.00697718025185168				2	2	23	Startle	120	0.0164	2	44
																															1	1	1	976	1.87241012637969	0.0072997520910576				2	2	31	PrePulse	86	0	2	42
																															1	1	1	977	1.8730552700581	0.00633203657343984				2	2	31	Startle	120	0.0245	2	42
																															1	1	1	978	1.87563584477175	0.00697718025185168				2	2	32	PrePulse	86	0	2	47
																															1	1	1	979	1.8785389913246	0.00697718025185168				2	2	32	Startle	120	0.0287	2	47
																															1	1	1	980	1.87628098845016	0.00697718025185168				2	2	47	PrePulse	86	0	2	46
																															1	1	1	981	1.87628098845016	0.00762232393026352				2	2	47	Startle	120	0.0228	2	46
																															1	1	1	982	1.87757127580699	0.0072997520910576				2	2	48	PrePulse	86	0	2	48
																															1	1	1	983	1.88111956603825	0.00665460841264576				2	2	48	Startle	120	0.0238	2	48
																															1	1	1	984	1.87692613212857	0.00762232393026352				2	2	56	PrePulse	86	0	2	45
																															1	1	1	985	1.87789384764619	0.00697718025185168				2	2	56	Startle	120	0.0145	2	45
																															1	1	1	986	1.87499070109334	0.00697718025185168				2	2	57	PrePulse	86	0	2	50
																															1	1	1	987	1.8840227125911	0.00762232393026352				2	2	57	Startle	120	0.0190	2	50
																															1	1	1	988	1.88144213787746	0.0072997520910576
																															1	1	1	989	1.88305499707349	0.00794489576946944				ASRc
																															1	1	1	990	1.88015185052063	0.00697718025185168				Chamber	Block ID	Trial ID	Period	Decibel	StdevVal	BlockId0	TrialId0
																															1	1	1	991	1.88563557178713	0.0072997520910576				2	2	4	Startle	120	0.1258	2	17
																															1	1	1	992	1.88466785626952	0.00762232393026352				2	2	9	Startle	120	0.1401	2	14
																															1	1	1	993	1.8837001407519	0.0072997520910576				2	2	12	Startle	120	0.1372	2	11
																															1	1	1	994	1.87918413500302	0.00633203657343984				2	2	18	Startle	120	0.1997	2	13
																															1	1	1	995	1.88047442235984	0.00762232393026352				2	2	25	Startle	120	0.1368	2	18
																															1	1	1	996	1.88240985339507	0.0072997520910576				2	2	43	Startle	120	0.1626	2	19
																															1	1	1	997	1.88240985339507	0.00762232393026352				2	2	46	Startle	120	0.2295	2	15
																															1	1	1	998	1.88015185052063	0.00762232393026352				2	2	50	Startle	120	0.1436	2	12
																															1	1	1	999	1.88208728155587	0.00762232393026352				2	2	51	Startle	120	0.1473	2	20
																															1	1	1	1000	1.88692585914396	0.00762232393026352				2	2	53	Startle	120	0.1539	2	16
																															1	1	2	1	1.9107961752452	0.0072997520910576
																															1	1	2	2	1.90660274133552	3.25914646312594				PPI Pct
																															1	1	2	3	1.90466731030028	3.25914646312594				Chamber	Type	Details	Result
																															1	1	2	4	1.89853844535537	3.25817874760833				2	ASRp	((0.0092 +0.0155 +0.0215 +0.0164 +0.0245 +0.0287 +0.0228 +0.0238 +0.0145 +0.0190)/10)*100	1.9590
																															1	1	2	5	1.90111902006902	3.25785617576912				2	ASRc	((0.1258 +0.1401 +0.1372 +0.1997 +0.1368 +0.1626 +0.2295 +0.1436 +0.1473 +0.1539)/10)*100	15.7650
																															1	1	2	6	1.89692558615934	3.25817874760833				2	PPI Pct	(ASRc - ASRp)/ASRc	87.5737
																															1	1	2	7	1.89369986776728	3.2568884602515
																															1	1	2	8	1.89176443673205	3.25753360392991
																															1	1	2	9	1.89015157753602	3.25753360392991
																															1	1	2	10	1.89240958041046	3.25624331657309
																															1	1	2	11	1.89047414937522	3.25785617576912
																															1	1	2	12	1.88692585914396	3.25592074473388
																															1	1	2	13	1.88434528443031	3.25592074473388
																															1	1	2	14	1.88660328730475	3.25592074473388
																															1	1	2	15	1.8840227125911	3.25753360392991
																															1	1	2	16	1.88047442235984	3.25753360392991
																															1	1	2	17	1.88015185052063	3.25753360392991
																															1	1	2	18	1.88531299994793	3.25721103209071
																															1	1	2	19	1.8946675832849	3.25785617576912
																															1	1	2	20	1.89853844535537	3.25785617576912
																															1	1	2	21	1.90595759765711	3.25753360392991
																															1	1	2	22	1.90692531317472	3.25559817289468
																															1	1	2	23	1.91144131892361	3.2568884602515
																															1	1	2	24	1.90240930742584	3.2568884602515
																															1	1	2	25	1.89273215224966	3.25721103209071
																															1	1	2	26	1.87660356028937	3.25785617576912
																															1	1	2	27	1.87047469534446	3.25785617576912
																															1	1	2	28	1.85853953729384	3.25850131944753
																															1	1	2	29	1.85208810050972	3.2565658884123
																															1	1	2	30	1.84531409188639	3.2565658884123
																															1	1	2	31	1.84466894820798	3.2568884602515
																															1	1	2	32	1.84692695108242	3.25753360392991
																															1	1	2	33	1.84466894820798	3.25721103209071
																															1	1	2	34	1.83886265510228	3.25721103209071
																															1	1	2	35	1.83176607463974	3.25753360392991
																															1	1	2	36	1.83047578728292	3.25817874760833
																															1	1	2	37	1.8291854999261	3.25753360392991
																															1	1	2	38	1.82434692233801	3.25721103209071
																															1	1	2	39	1.82531463785563	3.2568884602515
																															1	1	2	40	1.83079835912213	3.25753360392991
																															1	1	2	41	1.83918522694148	3.25817874760833
																															1	1	2	42	1.84112065797672	0.0072997520910576
																															1	1	2	43	1.84853981027845	0.00762232393026352
																															1	1	2	44	1.85079781315289	0.00697718025185168
																															1	1	2	45	1.86434583039954	0.00697718025185168
																															1	1	2	46	1.86595868959557	0.0072997520910576
																															1	1	2	47	1.87337784189731	0.0072997520910576
																															1	1	2	48	1.8730552700581	0.00762232393026352
																															1	1	2	49	1.88273242523428	0.0072997520910576
																															1	1	2	50	1.88015185052063	0.00762232393026352
																															1	1	2	51	1.88208728155587	0.00697718025185168
																															1	1	2	52	1.8782164194854	0.00633203657343984
																															1	1	2	53	1.88176470971666	0.00697718025185168
																															1	1	2	54	1.88047442235984	0.00633203657343984
																															1	1	2	55	1.88176470971666	0.0072997520910576
																															1	1	2	56	1.87595841661096	0.00665460841264576
																															1	1	2	57	1.87499070109334	0.0072997520910576
																															1	1	2	58	1.8727326982189	0.0072997520910576
																															1	1	2	59	1.8675715487916	0.0072997520910576
																															1	1	2	60	1.85918468097225	0.00697718025185168
																															1	1	2	61	1.85370095970575	0.00697718025185168
																															1	1	2	62	1.84789466660004	0.00762232393026352
																															1	1	2	63	1.85499124706257	0.00762232393026352
																															1	1	2	64	1.85434610338416	0.0072997520910576
																															1	1	2	65	1.86305554304272	0.00762232393026352
																															1	1	2	66	1.87079726718366	0.00762232393026352
																															1	1	2	67	1.88853871833999	0.0072997520910576
																															1	1	2	68	1.89757072983775	0.00697718025185168
																															1	1	2	69	1.90918331604917	0.00762232393026352
																															1	1	2	70	1.91240903444123	0.00665460841264576
																															1	1	2	71	1.91886047122534	0.0072997520910576
																															1	1	2	72	1.92369904881343	0.0072997520910576
																															1	1	2	73	1.92434419249184	0.00665460841264576
																															1	1	2	74	1.9166024683509	0.00794489576946944
																															1	1	2	75	1.91047360340599	0.0072997520910576
																															1	1	2	76	1.9056350258179	0.00794489576946944
																															1	1	2	77	1.89982873271219	0.0072997520910576
																															1	1	2	78	1.89111929305363	0.00697718025185168
																															1	1	2	79	1.88789357466158	0.0072997520910576
																															1	1	2	80	1.88531299994793	0.00697718025185168
																															1	1	2	81	1.89499015512411	0.00665460841264576
																															1	1	2	82	1.89628044248093	0.00762232393026352
																															1	1	2	83	1.90240930742584	0.0072997520910576
																															1	1	2	84	1.90369959478267	0.0072997520910576
																															1	1	2	85	1.91305417811964	0.00794489576946944
																															1	1	2	86	1.91821532754693	0.00697718025185168
																															1	1	2	87	1.92079590226058	0.0072997520910576
																															1	1	2	88	1.91853789938614	0.0072997520910576
																															1	1	2	89	1.91724761202931	0.00697718025185168
																															1	1	2	90	1.91466703731567	0.00633203657343984
																															1	1	2	91	1.90660274133552	0.00633203657343984
																															1	1	2	92	1.89240958041046	0.00762232393026352
																															1	1	2	93	1.87789384764619	0.00794489576946944
																															1	1	2	94	1.86595868959557	0.0072997520910576
																															1	1	2	95	1.8562815344194	0.0072997520910576
																															1	1	2	96	1.84305608901195	0.00794489576946944
																															1	1	2	97	1.83821751142386	0.00762232393026352
																															1	1	2	98	1.83595950854942	0.00762232393026352
																															1	1	2	99	1.84724952292163	0.0072997520910576
																															1	1	2	100	1.85144295683131	0.00762232393026352
																															1	1	2	101	1.86337811488193	0.00633203657343984
																															1	1	2	102	1.87015212350525	0.00697718025185168
																															1	1	2	103	1.88434528443031	0.0072997520910576
																															1	1	2	104	1.8891838620184	0.00697718025185168
																															1	1	2	105	1.89499015512411	0.00665460841264576
																															1	1	2	106	1.89079672121443	0.00794489576946944
																															1	1	2	107	1.89176443673205	0.00762232393026352
																															1	1	2	108	1.8895064338576	0.0072997520910576
																															1	1	2	109	1.88628071546555	0.00794489576946944
																															1	1	2	110	1.87692613212857	0.0072997520910576
																															1	1	2	111	1.87111983902287	0.00697718025185168
																															1	1	2	112	1.86853926430922	0.00794489576946944
																															1	1	2	113	1.86563611775637	0.0072997520910576
																															1	1	2	114	1.86079754016828	0.00697718025185168
																															1	1	2	115	1.86273297120351	0.00697718025185168
																															1	1	2	116	1.86595868959557	0.00665460841264576
																															1	1	2	117	1.87918413500302	0.00697718025185168
																															1	1	2	118	1.88273242523428	0.0072997520910576
																															1	1	2	119	1.89208700857125	0.00697718025185168
																															1	1	2	120	1.89499015512411	0.0072997520910576
																															1	1	2	121	1.90789302869234	0.00697718025185168
																															1	1	2	122	1.90660274133552	0.00697718025185168
																															1	1	2	123	1.91015103156678	0.00697718025185168
																															1	1	2	124	1.90273187926505	0.00665460841264576
																															1	1	2	125	1.90789302869234	0.00665460841264576
																															1	1	2	126	1.89789330167696	0.00697718025185168
																															1	1	2	127	1.8946675832849	0.00697718025185168
																															1	1	2	128	1.88208728155587	0.00762232393026352
																															1	1	2	129	1.88079699419904	0.00697718025185168
																															1	1	2	130	1.87434555741493	0.00697718025185168
																															1	1	2	131	1.87208755454048	0.00762232393026352
																															1	1	2	132	1.86337811488193	0.0072997520910576
																															1	1	2	133	1.86563611775637	0.0072997520910576
																															1	1	2	134	1.8672489769524	0.00697718025185168
																															1	1	2	135	1.87370041373651	0.0072997520910576
																															1	1	2	136	1.87402298557572	0.00697718025185168
																															1	1	2	137	1.88111956603825	0.00665460841264576
																															1	1	2	138	1.88434528443031	0.0072997520910576
																															1	1	2	139	1.89434501144569	0.00697718025185168
																															1	1	2	140	1.89047414937522	0.00762232393026352
																															1	1	2	141	1.89434501144569	0.00633203657343984
																															1	1	2	142	1.89047414937522	0.0072997520910576
																															1	1	2	143	1.89853844535537	0.00633203657343984
																															1	1	2	144	1.88982900569681	0.00633203657343984
																															1	1	2	145	1.88821614650078	0.0072997520910576
																															1	1	2	146	1.8785389913246	0.0072997520910576
																															1	1	2	147	1.87918413500302	0.00762232393026352
																															1	1	2	148	1.87047469534446	0.00665460841264576
																															1	1	2	149	1.86853926430922	0.00697718025185168
																															1	1	2	150	1.86305554304272	0.00762232393026352
																															1	1	2	151	1.8675715487916	0.00762232393026352
																															1	1	2	152	1.87176498270128	0.00665460841264576
																															1	1	2	153	1.87692613212857	0.00697718025185168
																															1	1	2	154	1.87950670684222	0.0072997520910576
																															1	1	2	155	1.88466785626952	0.00762232393026352
																															1	1	2	156	1.89273215224966	0.0072997520910576
																															1	1	2	157	1.89531272696331	0.00665460841264576
																															1	1	2	158	1.89273215224966	0.00697718025185168
																															1	1	2	159	1.89499015512411	0.00697718025185168
																															1	1	2	160	1.89724815799855	0.00697718025185168
																															1	1	2	161	1.89563529880252	0.00665460841264576
																															1	1	2	162	1.89079672121443	0.00697718025185168
																															1	1	2	163	1.88595814362634	0.0072997520910576
																															1	1	2	164	1.88111956603825	0.0072997520910576
																															1	1	2	165	1.88047442235984	0.0072997520910576
																															1	1	2	166	1.87144241086207	0.00826746760867536
																															1	1	2	167	1.86886183614843	0.0072997520910576
																															1	1	2	168	1.86402325856034	0.0072997520910576
																															1	1	2	169	1.87176498270128	0.0072997520910576
																															1	1	2	170	1.86886183614843	0.00697718025185168
																															1	1	2	171	1.87176498270128	0.00697718025185168
																															1	1	2	172	1.87111983902287	0.00665460841264576
																															1	1	2	173	1.87886156316381	0.0072997520910576
																															1	1	2	174	1.88047442235984	0.00762232393026352
																															1	1	2	175	1.88466785626952	0.0072997520910576
																															1	1	2	176	1.88176470971666	0.00600946473423392
																															1	1	2	177	1.8840227125911	0.00762232393026352
																															1	1	2	178	1.88434528443031	0.00633203657343984
																															1	1	2	179	1.88499042810872	0.00633203657343984
																															1	1	2	180	1.88111956603825	0.00762232393026352
																															1	1	2	181	1.87918413500302	0.0072997520910576
																															1	1	2	182	1.87918413500302	0.00762232393026352
																															1	1	2	183	1.87886156316381	0.0072997520910576
																															1	1	2	184	1.87337784189731	0.00762232393026352
																															1	1	2	185	1.87466812925413	0.00762232393026352
																															1	1	2	186	1.87047469534446	0.00697718025185168
																															1	1	2	187	1.87918413500302	0.0072997520910576
																															1	1	2	188	1.87531327293254	0.00794489576946944
																															1	1	2	189	1.88047442235984	0.0072997520910576
																															1	1	2	190	1.87692613212857	0.0072997520910576
																															1	1	2	191	1.88789357466158	0.00697718025185168
																															1	1	2	192	1.8840227125911	0.0072997520910576
																															1	1	2	193	1.8891838620184	0.00762232393026352
																															1	1	2	194	1.88176470971666	0.00697718025185168
																															1	1	2	195	1.89240958041046	0.00697718025185168
																															1	1	2	196	1.88757100282237	0.0072997520910576
																															1	1	2	197	1.89176443673205	0.00697718025185168
																															1	1	2	198	1.88273242523428	0.00794489576946944
																															1	1	2	199	1.88886129017919	0.00697718025185168
																															1	1	2	200	1.88434528443031	0.00665460841264576
																															1	1	2	201	1.88886129017919	0.00762232393026352
																															1	1	2	202	1.87757127580699	0.0072997520910576
																															1	1	2	203	1.88240985339507	0.00633203657343984
																															1	1	2	204	1.87757127580699	0.00826746760867536
																															1	1	2	205	1.88305499707349	0.0072997520910576
																															1	1	2	206	1.87402298557572	0.00794489576946944
																															1	1	2	207	1.88079699419904	0.00762232393026352
																															1	1	2	208	1.87757127580699	0.0072997520910576
																															1	1	2	209	1.88789357466158	0.00762232393026352
																															1	1	2	210	1.88047442235984	0.0072997520910576
																															1	1	2	211	1.88886129017919	0.0072997520910576
																															1	1	2	212	1.88240985339507	0.0072997520910576
																															1	1	2	213	1.89434501144569	0.00665460841264576
																															1	1	2	214	1.88660328730475	0.00665460841264576
																															1	1	2	215	1.89015157753602	0.0072997520910576
																															1	1	2	216	1.88208728155587	0.00697718025185168
																															1	1	2	217	1.88886129017919	0.00697718025185168
																															1	1	2	218	1.88305499707349	0.00697718025185168
																															1	1	2	219	1.88273242523428	0.00665460841264576
																															1	1	2	220	1.87660356028937	0.00697718025185168
																															1	1	2	221	1.87886156316381	0.0072997520910576
																															1	1	2	222	1.88015185052063	0.0072997520910576
																															1	1	2	223	1.87950670684222	0.0072997520910576
																															1	1	2	224	1.87886156316381	0.00762232393026352
																															1	1	2	225	1.87724870396778	0.00665460841264576
																															1	1	2	226	1.88208728155587	0.00697718025185168
																															1	1	2	227	1.88079699419904	0.0072997520910576
																															1	1	2	228	1.87982927868143	0.0072997520910576
																															1	1	2	229	1.87660356028937	0.00697718025185168
																															1	1	2	230	1.88047442235984	0.00633203657343984
																															1	1	2	231	1.87982927868143	0.00697718025185168
																															1	1	2	232	1.88015185052063	0.00697718025185168
																															1	1	2	233	1.87660356028937	0.00665460841264576
																															1	1	2	234	1.87724870396778	0.00762232393026352
																															1	1	2	235	1.87982927868143	0.00665460841264576
																															1	1	2	236	1.87886156316381	0.00697718025185168
																															1	1	2	237	1.87692613212857	0.00762232393026352
																															1	1	2	238	1.87499070109334	0.00633203657343984
																															1	1	2	239	1.8782164194854	0.0072997520910576
																															1	1	2	240	1.8785389913246	0.00697718025185168
																															1	1	2	241	1.8785389913246	0.00697718025185168
																															1	1	2	242	1.8785389913246	0.00697718025185168
																															1	1	2	243	1.88144213787746	0.00762232393026352
																															1	1	2	244	1.88563557178713	0.0072997520910576
																															1	1	2	245	1.8837001407519	0.0072997520910576
																															1	1	2	246	1.8837001407519	0.00665460841264576
																															1	1	2	247	1.88240985339507	0.0072997520910576
																															1	1	2	248	1.88595814362634	0.00697718025185168
																															1	1	2	249	1.88337756891269	0.00665460841264576
																															1	1	2	250	1.88273242523428	0.00697718025185168
																															1	1	2	251	1.87918413500302	0.00633203657343984
																															1	1	2	252	1.88111956603825	0.00697718025185168
																															1	1	2	253	1.88176470971666	0.00794489576946944
																															1	1	2	254	1.88047442235984	0.00697718025185168
																															1	1	2	255	1.8785389913246	0.00762232393026352
																															1	1	2	256	1.8785389913246	0.0072997520910576
																															1	1	2	257	1.88240985339507	0.0072997520910576
																															1	1	2	258	1.88240985339507	0.00762232393026352
																															1	1	2	259	1.88111956603825	0.00697718025185168
																															1	1	2	260	1.88079699419904	0.00697718025185168
																															1	1	2	261	1.88240985339507	0.00762232393026352
																															1	1	2	262	1.88531299994793	0.00697718025185168
																															1	1	2	263	1.8837001407519	0.0072997520910576
																															1	1	2	264	1.88305499707349	0.00633203657343984
																															1	1	2	265	1.88273242523428	0.00697718025185168
																															1	1	2	266	1.88724843098316	0.00665460841264576
																															1	1	2	267	1.88337756891269	0.00697718025185168
																															1	1	2	268	1.8840227125911	0.00762232393026352
																															1	1	2	269	1.8785389913246	0.00762232393026352
																															1	1	2	270	1.88047442235984	0.00697718025185168
																															1	1	2	271	1.87982927868143	0.00697718025185168
																															1	1	2	272	1.87789384764619	0.00762232393026352
																															1	1	2	273	1.87434555741493	0.00665460841264576
																															1	1	2	274	1.87595841661096	0.00794489576946944
																															1	1	2	275	1.87982927868143	0.0072997520910576
																															1	1	2	276	1.88176470971666	0.0072997520910576
																															1	1	2	277	1.87982927868143	0.00762232393026352
																															1	1	2	278	1.88273242523428	0.00697718025185168
																															1	1	2	279	1.88499042810872	0.0072997520910576
																															1	1	2	280	1.88499042810872	0.0072997520910576
																															1	1	2	281	1.88337756891269	0.00697718025185168
																															1	1	2	282	1.88208728155587	0.0072997520910576
																															1	1	2	283	1.8785389913246	0.00697718025185168
																															1	1	2	284	1.88499042810872	0.00762232393026352
																															1	1	2	285	1.87886156316381	0.00697718025185168
																															1	1	2	286	1.87982927868143	0.00697718025185168
																															1	1	2	287	1.87531327293254	0.00697718025185168
																															1	1	2	288	1.88144213787746	0.00697718025185168
																															1	1	2	289	1.87757127580699	0.00665460841264576
																															1	1	2	290	1.87950670684222	0.00697718025185168
																															1	1	2	291	1.87660356028937	0.00697718025185168
																															1	1	2	292	1.88176470971666	0.0072997520910576
																															1	1	2	293	1.88015185052063	0.0072997520910576
																															1	1	2	294	1.88208728155587	0.0072997520910576
																															1	1	2	295	1.87692613212857	0.00697718025185168
																															1	1	2	296	1.88015185052063	0.00697718025185168
																															1	1	2	297	1.88337756891269	0.0072997520910576
																															1	1	2	298	1.88466785626952	0.00697718025185168
																															1	1	2	299	1.88111956603825	0.0072997520910576
																															1	1	2	300	1.88208728155587	0.0072997520910576
																															1	1	2	301	1.8840227125911	0.0072997520910576
																															1	1	2	302	1.88563557178713	0.0072997520910576
																															1	1	2	303	1.88144213787746	0.00762232393026352
																															1	1	2	304	1.88144213787746	0.0072997520910576
																															1	1	2	305	1.88047442235984	0.00762232393026352
																															1	1	2	306	1.88337756891269	0.00762232393026352
																															1	1	2	307	1.88015185052063	0.00697718025185168
																															1	1	2	308	1.88015185052063	0.0072997520910576
																															1	1	2	309	1.87757127580699	0.00762232393026352
																															1	1	2	310	1.88434528443031	0.00697718025185168
																															1	1	2	311	1.88015185052063	0.0072997520910576
																															1	1	2	312	1.88273242523428	0.00762232393026352
																															1	1	2	313	1.8785389913246	0.0072997520910576
																															1	1	2	314	1.88305499707349	0.00762232393026352
																															1	1	2	315	1.88176470971666	0.00762232393026352
																															1	1	2	316	1.88208728155587	0.00762232393026352
																															1	1	2	317	1.87918413500302	0.00665460841264576
																															1	1	2	318	1.88047442235984	0.0072997520910576
																															1	1	2	319	1.88176470971666	0.0072997520910576
																															1	1	2	320	1.88305499707349	0.0072997520910576
																															1	1	2	321	1.87950670684222	0.00697718025185168
																															1	1	2	322	1.88015185052063	0.00697718025185168
																															1	1	2	323	1.8837001407519	0.00633203657343984
																															1	1	2	324	1.88273242523428	0.00697718025185168
																															1	1	2	325	1.88047442235984	0.00697718025185168
																															1	1	2	326	1.87950670684222	0.00665460841264576
																															1	1	2	327	1.87982927868143	0.00697718025185168
																															1	1	2	328	1.88208728155587	0.005686892895028
																															1	1	2	329	1.8785389913246	0.0072997520910576
																															1	1	2	330	1.88079699419904	0.0072997520910576
																															1	1	2	331	1.87628098845016	0.0072997520910576
																															1	1	2	332	1.88176470971666	0.00762232393026352
																															1	1	2	333	1.87918413500302	0.00697718025185168
																															1	1	2	334	1.87982927868143	0.00762232393026352
																															1	1	2	335	1.87692613212857	0.00697718025185168
																															1	1	2	336	1.88305499707349	0.0072997520910576
																															1	1	2	337	1.88176470971666	0.0072997520910576
																															1	1	2	338	1.88273242523428	0.0072997520910576
																															1	1	2	339	1.8782164194854	0.0072997520910576
																															1	1	2	340	1.88015185052063	0.0072997520910576
																															1	1	2	341	1.88337756891269	0.00697718025185168
																															1	1	2	342	1.88176470971666	0.00697718025185168
																															1	1	2	343	1.87982927868143	0.00762232393026352
																															1	1	2	344	1.8785389913246	0.0072997520910576
																															1	1	2	345	1.88079699419904	0.00762232393026352
																															1	1	2	346	1.88273242523428	0.0072997520910576
																															1	1	2	347	1.8782164194854	0.0072997520910576
																															1	1	2	348	1.87950670684222	0.0072997520910576
																															1	1	2	349	1.8785389913246	0.00665460841264576
																															1	1	2	350	1.88466785626952	0.00697718025185168
																															1	1	2	351	1.88176470971666	0.00697718025185168
																															1	1	2	352	1.88305499707349	0.00665460841264576
																															1	1	2	353	1.87982927868143	0.00826746760867536
																															1	1	2	354	1.88595814362634	0.0072997520910576
																															1	1	2	355	1.88176470971666	0.00762232393026352
																															1	1	2	356	1.88273242523428	0.00697718025185168
																															1	1	2	357	1.87757127580699	0.00697718025185168
																															1	1	2	358	1.88176470971666	0.00665460841264576
																															1	1	2	359	1.88111956603825	0.00697718025185168
																															1	1	2	360	1.88273242523428	0.00762232393026352
																															1	1	2	361	1.87886156316381	0.0072997520910576
																															1	1	2	362	1.88305499707349	0.00697718025185168
																															1	1	2	363	1.8840227125911	0.00697718025185168
																															1	1	2	364	1.88595814362634	0.00826746760867536
																															1	1	2	365	1.88111956603825	0.00762232393026352
																															1	1	2	366	1.88208728155587	0.00697718025185168
																															1	1	2	367	1.88240985339507	0.00762232393026352
																															1	1	2	368	1.88466785626952	0.0072997520910576
																															1	1	2	369	1.88047442235984	0.0072997520910576
																															1	1	2	370	1.88144213787746	0.00697718025185168
																															1	1	2	371	1.88079699419904	0.0072997520910576
																															1	1	2	372	1.88757100282237	0.00826746760867536
																															1	1	2	373	1.88111956603825	0.00794489576946944
																															1	1	2	374	1.88337756891269	0.0072997520910576
																															1	1	2	375	1.87886156316381	0.00762232393026352
																															1	1	2	376	1.88660328730475	0.00762232393026352
																															1	1	2	377	1.87950670684222	0.0072997520910576
																															1	1	2	378	1.88240985339507	0.0072997520910576
																															1	1	2	379	1.87628098845016	0.0072997520910576
																															1	1	2	380	1.88466785626952	0.0072997520910576
																															1	1	2	381	1.87982927868143	0.00665460841264576
																															1	1	2	382	1.88434528443031	0.00633203657343984
																															1	1	2	383	1.8785389913246	0.00762232393026352
																															1	1	2	384	1.8840227125911	0.00697718025185168
																															1	1	2	385	1.88305499707349	0.00665460841264576
																															1	1	2	386	1.88434528443031	0.00762232393026352
																															1	1	2	387	1.87789384764619	0.00697718025185168
																															1	1	2	388	1.88015185052063	0.00697718025185168
																															1	1	2	389	1.88144213787746	0.0072997520910576
																															1	1	2	390	1.88305499707349	0.00762232393026352
																															1	1	2	391	1.8782164194854	0.00794489576946944
																															1	1	2	392	1.87950670684222	0.00762232393026352
																															1	1	2	393	1.87918413500302	0.0072997520910576
																															1	1	2	394	1.88273242523428	0.0072997520910576
																															1	1	2	395	1.87950670684222	0.0072997520910576
																															1	1	2	396	1.87982927868143	0.00697718025185168
																															1	1	2	397	1.87789384764619	0.0072997520910576
																															1	1	2	398	1.8837001407519	0.0072997520910576
																															1	1	2	399	1.87950670684222	0.00697718025185168
																															1	1	2	400	1.88079699419904	0.0072997520910576
																															1	1	2	401	1.8785389913246	0.0072997520910576
																															1	1	2	402	1.88531299994793	0.0072997520910576
																															1	1	2	403	1.88240985339507	0.00697718025185168
																															1	1	2	404	1.88273242523428	0.00762232393026352
																															1	1	2	405	1.87950670684222	0.00697718025185168
																															1	1	2	406	1.8837001407519	0.00665460841264576
																															1	1	2	407	1.88273242523428	0.0072997520910576
																															1	1	2	408	1.8840227125911	0.00697718025185168
																															1	1	2	409	1.87886156316381	0.00697718025185168
																															1	1	2	410	1.88047442235984	0.00665460841264576
																															1	1	2	411	1.88144213787746	0.00697718025185168
																															1	1	2	412	1.88144213787746	0.00762232393026352
																															1	1	2	413	1.87789384764619	0.0072997520910576
																															1	1	2	414	1.87918413500302	0.00762232393026352
																															1	1	2	415	1.88144213787746	0.00697718025185168
																															1	1	2	416	1.88305499707349	0.0072997520910576
																															1	1	2	417	1.87982927868143	0.0072997520910576
																															1	1	2	418	1.88079699419904	0.00697718025185168
																															1	1	2	419	1.8837001407519	0.00794489576946944
																															1	1	2	420	1.88499042810872	0.00826746760867536
																															1	1	2	421	1.88305499707349	0.00794489576946944
																															1	1	2	422	1.88144213787746	0.00762232393026352
																															1	1	2	423	1.88111956603825	0.0072997520910576
																															1	1	2	424	1.88628071546555	0.00697718025185168
																															1	1	2	425	1.88208728155587	0.00665460841264576
																															1	1	2	426	1.8837001407519	0.00697718025185168
																															1	1	2	427	1.88047442235984	0.00697718025185168
																															1	1	2	428	1.88692585914396	0.00697718025185168
																															1	1	2	429	1.88273242523428	0.00794489576946944
																															1	1	2	430	1.88434528443031	0.00762232393026352
																															1	1	2	431	1.8785389913246	0.00697718025185168
																															1	1	2	432	1.8840227125911	0.00762232393026352
																															1	1	2	433	1.88144213787746	0.00762232393026352
																															1	1	2	434	1.88499042810872	0.00697718025185168
																															1	1	2	435	1.8782164194854	0.00697718025185168
																															1	1	2	436	1.88144213787746	0.00633203657343984
																															1	1	2	437	1.88208728155587	0.00762232393026352
																															1	1	2	438	1.88628071546555	0.0072997520910576
																															1	1	2	439	1.88079699419904	0.00697718025185168
																															1	1	2	440	1.88499042810872	0.0072997520910576
																															1	1	2	441	1.88337756891269	0.00859003944788128
																															1	1	2	442	1.8891838620184	0.00697718025185168
																															1	1	2	443	1.88015185052063	0.00665460841264576
																															1	1	2	444	1.88563557178713	0.00697718025185168
																															1	1	2	445	1.8782164194854	0.0072997520910576
																															1	1	2	446	1.88853871833999	0.00665460841264576
																															1	1	2	447	1.87757127580699	0.00665460841264576
																															1	1	2	448	1.8840227125911	0.00826746760867536
																															1	1	2	449	1.87402298557572	0.00762232393026352
																															1	1	2	450	1.88757100282237	0.00762232393026352
																															1	1	2	451	1.8782164194854	0.00762232393026352
																															1	1	2	452	1.88724843098316	0.00697718025185168
																															1	1	2	453	1.87692613212857	0.00665460841264576
																															1	1	2	454	1.88982900569681	0.00697718025185168
																															1	1	2	455	1.88208728155587	0.00697718025185168
																															1	1	2	456	1.88886129017919	0.0072997520910576
																															1	1	2	457	1.87950670684222	0.00697718025185168
																															1	1	2	458	1.88628071546555	0.00762232393026352
																															1	1	2	459	1.88273242523428	0.00762232393026352
																															1	1	2	460	1.88595814362634	0.0072997520910576
																															1	1	2	461	1.87918413500302	0.00697718025185168
																															1	1	2	462	1.88144213787746	0.00665460841264576
																															1	1	2	463	1.88240985339507	0.00665460841264576
																															1	1	2	464	1.8840227125911	0.0072997520910576
																															1	1	2	465	1.88079699419904	0.00665460841264576
																															1	1	2	466	1.87918413500302	0.00697718025185168
																															1	1	2	467	1.8782164194854	0.0072997520910576
																															1	1	2	468	1.88176470971666	0.00697718025185168
																															1	1	2	469	1.87757127580699	0.00665460841264576
																															1	1	2	470	1.87595841661096	0.0072997520910576
																															1	1	2	471	1.87499070109334	0.00697718025185168
																															1	1	2	472	1.88015185052063	0.00762232393026352
																															1	1	2	473	1.87982927868143	0.00697718025185168
																															1	1	2	474	1.8785389913246	0.0072997520910576
																															1	1	2	475	1.8782164194854	0.00762232393026352
																															1	1	2	476	1.88111956603825	0.0072997520910576
																															1	1	2	477	1.88111956603825	0.0072997520910576
																															1	1	2	478	1.87982927868143	0.0072997520910576
																															1	1	2	479	1.87789384764619	0.00794489576946944
																															1	1	2	480	1.87886156316381	0.0072997520910576
																															1	1	2	481	1.88240985339507	0.00697718025185168
																															1	1	2	482	1.87918413500302	0.0072997520910576
																															1	1	2	483	1.87918413500302	0.0072997520910576
																															1	1	2	484	1.8782164194854	0.00762232393026352
																															1	1	2	485	1.8840227125911	0.00665460841264576
																															1	1	2	486	1.88273242523428	0.00762232393026352
																															1	1	2	487	1.88273242523428	0.0072997520910576
																															1	1	2	488	1.87950670684222	0.00697718025185168
																															1	1	2	489	1.8837001407519	0.00697718025185168
																															1	1	2	490	1.88466785626952	0.00697718025185168
																															1	1	2	491	1.8840227125911	0.00794489576946944
																															1	1	2	492	1.87982927868143	0.00826746760867536
																															1	1	2	493	1.87918413500302	0.00762232393026352
																															1	1	2	494	1.88337756891269	0.00697718025185168
																															1	1	2	495	1.88176470971666	0.0072997520910576
																															1	1	2	496	1.87918413500302	0.0072997520910576
																															1	1	2	497	1.87789384764619	0.00762232393026352
																															1	1	2	498	1.88079699419904	0.00665460841264576
																															1	1	2	499	1.88144213787746	0.00826746760867536
																															1	1	2	500	1.87950670684222	0.00697718025185168
																															1	1	2	501	1.8782164194854	0.00665460841264576
																															1	1	2	502	1.88047442235984	0.00600946473423392
																															1	1	2	503	1.88337756891269	0.00697718025185168
																															1	1	2	504	1.88111956603825	0.00762232393026352
																															1	1	2	505	1.88047442235984	0.0072997520910576
																															1	1	2	506	1.8785389913246	0.00697718025185168
																															1	1	2	507	1.88434528443031	0.00697718025185168
																															1	1	2	508	1.88111956603825	0.00697718025185168
																															1	1	2	509	1.88176470971666	0.00697718025185168
																															1	1	2	510	1.87757127580699	0.00600946473423392
																															1	1	2	511	1.88079699419904	0.00665460841264576
																															1	1	2	512	1.88208728155587	0.00633203657343984
																															1	1	2	513	1.88111956603825	0.00826746760867536
																															1	1	2	514	1.8782164194854	0.00697718025185168
																															1	1	2	515	1.8782164194854	0.0072997520910576
																															1	1	2	516	1.88079699419904	0.00762232393026352
																															1	1	2	517	1.88144213787746	0.00697718025185168
																															1	1	2	518	1.87918413500302	0.00665460841264576
																															1	1	2	519	1.87950670684222	0.0072997520910576
																															1	1	2	520	1.88434528443031	0.00762232393026352
																															1	1	2	521	1.88466785626952	0.0072997520910576
																															1	1	2	522	1.88208728155587	0.0072997520910576
																															1	1	2	523	1.88208728155587	0.00762232393026352
																															1	1	2	524	1.88144213787746	0.00697718025185168
																															1	1	2	525	1.88724843098316	0.00794489576946944
																															1	1	2	526	1.88337756891269	0.00697718025185168
																															1	1	2	527	1.88240985339507	0.00697718025185168
																															1	1	2	528	1.8785389913246	0.005686892895028
																															1	1	2	529	1.8840227125911	0.00600946473423392
																															1	1	2	530	1.88144213787746	0.0072997520910576
																															1	1	2	531	1.88208728155587	0.00697718025185168
																															1	1	2	532	1.87692613212857	0.00697718025185168
																															1	1	2	533	1.88240985339507	0.00633203657343984
																															1	1	2	534	1.88047442235984	0.00697718025185168
																															1	1	2	535	1.88144213787746	0.00762232393026352
																															1	1	2	536	1.87789384764619	0.00762232393026352
																															1	1	2	537	1.87918413500302	0.00665460841264576
																															1	1	2	538	1.88240985339507	0.00762232393026352
																															1	1	2	539	1.88337756891269	0.00762232393026352
																															1	1	2	540	1.88079699419904	0.00665460841264576
																															1	1	2	541	1.88176470971666	0.00794489576946944
																															1	1	2	542	1.8837001407519	0.00794489576946944
																															1	1	2	543	1.88757100282237	0.00665460841264576
																															1	1	2	544	1.88240985339507	0.0072997520910576
																															1	1	2	545	1.88305499707349	0.00697718025185168
																															1	1	2	546	1.88047442235984	0.00665460841264576
																															1	1	2	547	1.88531299994793	0.00697718025185168
																															1	1	2	548	1.88079699419904	0.0072997520910576
																															1	1	2	549	1.88273242523428	0.00697718025185168
																															1	1	2	550	1.8782164194854	0.00697718025185168
																															1	1	2	551	1.88531299994793	0.0072997520910576
																															1	1	2	552	1.88111956603825	0.00697718025185168
																															1	1	2	553	1.8837001407519	0.00697718025185168
																															1	1	2	554	1.87982927868143	0.00762232393026352
																															1	1	2	555	1.88531299994793	0.0072997520910576
																															1	1	2	556	1.88434528443031	0.00697718025185168
																															1	1	2	557	1.88466785626952	0.00762232393026352
																															1	1	2	558	1.88111956603825	0.00697718025185168
																															1	1	2	559	1.88240985339507	0.00762232393026352
																															1	1	2	560	1.88595814362634	0.00697718025185168
																															1	1	2	561	1.88531299994793	0.00633203657343984
																															1	1	2	562	1.88273242523428	0.00762232393026352
																															1	1	2	563	1.88305499707349	0.00697718025185168
																															1	1	2	564	1.88466785626952	0.00697718025185168
																															1	1	2	565	1.88531299994793	0.00665460841264576
																															1	1	2	566	1.88176470971666	0.0072997520910576
																															1	1	2	567	1.88111956603825	0.00665460841264576
																															1	1	2	568	1.87692613212857	0.0072997520910576
																															1	1	2	569	1.88240985339507	0.0072997520910576
																															1	1	2	570	1.87789384764619	0.00762232393026352
																															1	1	2	571	1.8785389913246	0.00665460841264576
																															1	1	2	572	1.87402298557572	0.00665460841264576
																															1	1	2	573	1.87724870396778	0.00762232393026352
																															1	1	2	574	1.87660356028937	0.00762232393026352
																															1	1	2	575	1.87628098845016	0.0072997520910576
																															1	1	2	576	1.87434555741493	0.0072997520910576
																															1	1	2	577	1.87595841661096	0.00697718025185168
																															1	1	2	578	1.87950670684222	0.00697718025185168
																															1	1	2	579	1.88079699419904	0.00697718025185168
																															1	1	2	580	1.87950670684222	0.0072997520910576
																															1	1	2	581	1.87982927868143	0.00859003944788128
																															1	1	2	582	1.88240985339507	0.00697718025185168
																															1	1	2	583	1.88305499707349	0.00762232393026352
																															1	1	2	584	1.88047442235984	0.00794489576946944
																															1	1	2	585	1.88111956603825	0.005686892895028
																															1	1	2	586	1.8782164194854	0.00697718025185168
																															1	1	2	587	1.88499042810872	0.00697718025185168
																															1	1	2	588	1.88079699419904	0.00697718025185168
																															1	1	2	589	1.88111956603825	0.00697718025185168
																															1	1	2	590	1.87724870396778	0.0072997520910576
																															1	1	2	591	1.88176470971666	0.00697718025185168
																															1	1	2	592	1.87950670684222	0.00762232393026352
																															1	1	2	593	1.88047442235984	0.0072997520910576
																															1	1	2	594	1.87660356028937	0.00697718025185168
																															1	1	2	595	1.8782164194854	0.00633203657343984
																															1	1	2	596	1.88176470971666	0.00762232393026352
																															1	1	2	597	1.88208728155587	0.00633203657343984
																															1	1	2	598	1.87918413500302	0.0072997520910576
																															1	1	2	599	1.8785389913246	0.0072997520910576
																															1	1	2	600	1.88111956603825	0.00697718025185168
																															1	1	2	601	1.88240985339507	0.00697718025185168
																															1	1	2	602	1.87918413500302	0.00697718025185168
																															1	1	2	603	1.88015185052063	0.00762232393026352
																															1	1	2	604	1.87757127580699	0.0072997520910576
																															1	1	2	605	1.88305499707349	0.00762232393026352
																															1	1	2	606	1.88015185052063	0.0072997520910576
																															1	1	2	607	1.88111956603825	0.00665460841264576
																															1	1	2	608	1.87789384764619	0.0072997520910576
																															1	1	2	609	1.88499042810872	0.00697718025185168
																															1	1	2	610	1.87886156316381	0.00665460841264576
																															1	1	2	611	1.88079699419904	0.0072997520910576
																															1	1	2	612	1.87531327293254	0.0072997520910576
																															1	1	2	613	1.88273242523428	0.005686892895028
																															1	1	2	614	1.88047442235984	0.00600946473423392
																															1	1	2	615	1.8837001407519	0.00794489576946944
																															1	1	2	616	1.87982927868143	0.00665460841264576
																															1	1	2	617	1.88305499707349	0.00794489576946944
																															1	1	2	618	1.88434528443031	0.0072997520910576
																															1	1	2	619	1.88757100282237	0.0072997520910576
																															1	1	2	620	1.88208728155587	0.00762232393026352
																															1	1	2	621	1.88531299994793	0.00665460841264576
																															1	1	2	622	1.88499042810872	0.00794489576946944
																															1	1	2	623	1.88789357466158	0.00697718025185168
																															1	1	2	624	1.88273242523428	0.00762232393026352
																															1	1	2	625	1.88434528443031	0.00665460841264576
																															1	1	2	626	1.88531299994793	0.00697718025185168
																															1	1	2	627	1.88757100282237	0.00697718025185168
																															1	1	2	628	1.88240985339507	0.0072997520910576
																															1	1	2	629	1.88499042810872	0.0072997520910576
																															1	1	2	630	1.8785389913246	0.00762232393026352
																															1	1	2	631	1.88692585914396	0.00697718025185168
																															1	1	2	632	1.88111956603825	0.0072997520910576
																															1	1	2	633	1.88273242523428	0.0072997520910576
																															1	1	2	634	1.87757127580699	0.00794489576946944
																															1	1	2	635	1.88692585914396	0.00665460841264576
																															1	1	2	636	1.88079699419904	0.00697718025185168
																															1	1	2	637	1.88305499707349	0.0089126112870872
																															1	1	2	638	1.87757127580699	0.0072997520910576
																															1	1	2	639	1.88240985339507	0.00697718025185168
																															1	1	2	640	1.88240985339507	0.0072997520910576
																															1	1	2	641	1.8837001407519	0.0072997520910576
																															1	1	2	642	1.88015185052063	0.0072997520910576
																															1	1	2	643	1.88144213787746	0.00697718025185168
																															1	1	2	644	1.88499042810872	0.0072997520910576
																															1	1	2	645	1.88595814362634	0.00697718025185168
																															1	1	2	646	1.88208728155587	0.0072997520910576
																															1	1	2	647	1.88240985339507	0.0072997520910576
																															1	1	2	648	1.88273242523428	0.0072997520910576
																															1	1	2	649	1.8840227125911	0.00697718025185168
																															1	1	2	650	1.87950670684222	0.0072997520910576
																															1	1	2	651	1.87918413500302	0.00697718025185168
																															1	1	2	652	1.87692613212857	0.00697718025185168
																															1	1	2	653	1.88208728155587	0.00665460841264576
																															1	1	2	654	1.8782164194854	0.00697718025185168
																															1	1	2	655	1.87886156316381	0.0072997520910576
																															1	1	2	656	1.87466812925413	0.00697718025185168
																															1	1	2	657	1.87950670684222	0.00697718025185168
																															1	1	2	658	1.87918413500302	0.0072997520910576
																															1	1	2	659	1.88015185052063	0.00697718025185168
																															1	1	2	660	1.87692613212857	0.00762232393026352
																															1	1	2	661	1.87950670684222	0.0072997520910576
																															1	1	2	662	1.88079699419904	0.00762232393026352
																															1	1	2	663	1.88208728155587	0.00697718025185168
																															1	1	2	664	1.8785389913246	0.0072997520910576
																															1	1	2	665	1.88047442235984	0.00762232393026352
[truncated: 158,335 more rows]

## Sheet: Control 5
Protocol Name	Result Name	Technician																													Chamber	BlockId	TrialId	X	ASR	Stimuli				ASRp
[truncated: 80,000 more rows]

[truncated: 22 more sheets: Control 6-7, Control 8-9, Control 10, Control 11-12, Control 13, Control 14-15, Control 16-17, Control 18, Control 19-20, shTrem2 1-2, shTrem2 3-4, shTrem2 5-6, shTrem2 7, shTrem2 8-9, shTrem2 10, shTrem2 11, shTrem2 12-13, shTrem2 14, shTrem2 15, shTrem2 16-17 …]
