# Supplementary material
Source: Research Square preprint supplement (doi:10.21203/rs.3.rs-9239420/v1)
Supplement: Supplementary file 4 [file 5f6f059e86119d6816150d8e.xlsx]

## Sheet: Supplementary Table 1
Demographics and clinical characteristics of the subjects
Number	Name	Gender	Age	BMI	Smoking	Education level (years)	PANSS-T	PANSS-P	PANSS-N	PANSS-G
Control 1	Sun Yao	Male	17	19.11	No	10	NA	NA	NA	NA
Control 2	Gao Mingyang	Male	22	20.82	No	8	NA	NA	NA	NA
Control 3	Shi Ruofan	Male	25	18.56	No	15	NA	NA	NA	NA
Control 4	Song Zhen	Femal	33	19.34	No	8	NA	NA	NA	NA
Control 5	Wang Changhai	Male	26	25.23	No	12	NA	NA	NA	NA
Control 6	Zhang Xiaoyun	Femal	28	22.67	No	15	NA	NA	NA	NA
Control 7	Zhang Yan	Femal	20	18.56	No	12	NA	NA	NA	NA
Control 8	Hu Qiushi	Male	27	26.12	No	10	NA	NA	NA	NA
Control 9	Liu Zhexin	Femal	18	24.89	No	12	NA	NA	NA	NA
Control 10	Lv Peipei	Femal	22	22.45	No	10	NA	NA	NA	NA
Control 11	Liu Fang	Femal	25	21.34	No	16	NA	NA	NA	NA
Control 12	Zhang Heran	Male	19	19.78	No	9	NA	NA	NA	NA
Control 13	Zheng Mingxin	Femal	31	27.01	No	6	NA	NA	NA	NA
Control 14	Zhao Runan	Femal	23	22.12	No	12	NA	NA	NA	NA
Control 15	Hei Gangrui	Male	30	18.23	No	5	NA	NA	NA	NA
Control 16	Chen Yishao	Male	27	25.78	No	9	NA	NA	NA	NA
Control 17	Guo Zihan	Femal	36	26.45	No	10	NA	NA	NA	NA
Control 18	Shi Jingjing	Femal	22	24.67	No	12	NA	NA	NA	NA
Schizophrenia 1	Wang Sen	Femal	17	24.45	No	12	75	20	18	37
Schizophrenia 2	Zhang Chenshuo	Male	19	22.67	No	13	61	11	20	30
Schizophrenia 3	Pei Tianyi	Male	26	25.12	Yse	8	68	23	11	34
Schizophrenia 4	Wan Zhengwei	Femal	20	20.89	No	9	67	15	13	39
Schizophrenia 5	Sang Shengchao	Femal	34	25.78	No	12	78	20	20	38
Schizophrenia 6	Ji Heqing	Femal	29	23.34	No	12	72	13	19	40
Schizophrenia 7	Wan Liuyue	Femal	17	19.56	No	12	77	21	19	37
Schizophrenia 8	Cui Haiyan	Male	28	26.34	No	6	74	22	15	37
Schizophrenia 9	Su Yaozhu	Femal	25	24.01	No	7	79	21	16	42
Schizophrenia 10	Li Kaiyue	Male	19	26.45	No	15	86	19	22	45
Schizophrenia 11	Wan Jiale	Male	26	25.23	No	6	64	17	18	29
Schizophrenia 12	Guo Zhenzhen	Male	25	20.67	No	9	65	17	16	32
Schizophrenia 13	Hu Xianghui	Male	23	18.89	No	9	66	20	12	34
Schizophrenia 14	Li Jiaying	Male	24	23.67	No	9	61	17	10	34
Schizophrenia 15	Lu Lu	Male	21	19.78	No	12	72	20	16	36
Schizophrenia 16	Zhou Huawei	Femal	28	26.12	No	6	81	23	19	39
Schizophrenia 17	Liu Zitong	Male	18	25.34	No	10	71	17	18	36
Schizophrenia 18	Xu Shicheng	Male	23	20.12	No	16	75	20	18	37
Schizophrenia 19	Wang Fuyuan	Femal	26	25.45	No	16	67	15	15	37
Schizophrenia 20	Zhao Lihong	Femal	34	21.34	No	16	80	27	17	36
Schizophrenia 21	Fu Zheng	Male	27	27.67	No	12	73	11	24	38
Schizophrenia 22	Ma Zihan	Male	24	25.89	No	12	66	15	17	34
Schizophrenia 23	Zhang Weiwei	Femal	27	19.45	No	11	70	18	15	37
Schizophrenia 24	Liu Saijun	Femal	28	26.23	No	9	62	20	12	30
Schizophrenia 25	Li Jiawen	Femal	25	24.56	No	12	82	23	24	35
Schizophrenia 26	Hu Yu	Femal	23	22.78	No	15	74	20	19	35
Schizophrenia 27	Gao Yuanying	Femal	26	18.34	No	12	69	17	15	37
Schizophrenia 28	Wu Shanglin	Femal	30	20.56	No	9	73	21	15	37
