# Supplementary material
Source: Research Square preprint supplement (doi:10.21203/rs.3.rs-9239420/v1)
Supplement: Supplementary file 5 [file 81d68dbdc94ec0b8b1d79bb6.xlsx]

## Sheet: Sheet1
RT-qPCR shows mRNA expression of IL-1β, IL-6 IL-10 and TNF-α in iMG cells derived from schizophrenia patients and controls ( 2-△△CT)
Gene	Control 1	Control 2	Control 3	Control 4	Control 5	Control 6	Control 7	Control 8	Control 9	Control 10	Control 11	Control 12	Control 13	Control 14	Control 15	Schizophrenia 1	Schizophrenia 2	Schizophrenia 3	Schizophrenia 4	Schizophrenia 5	Schizophrenia 6	Schizophrenia 7	Schizophrenia 8	Schizophrenia 9	Schizophrenia 10	Schizophrenia 11	Schizophrenia 12	Schizophrenia 13	Schizophrenia 14	Schizophrenia 15
IL-1β	1.13979	0.976618	0.898361	1.15554	1.01246	0.748807	0.877984	0.915268	0.90775	1.12941	0.471937	1.03553	1.06908	3.1625	0.798335	2.70095	3.90106	1.59656	5.09106	4.78085	7.45633	0.489292	3.74396	3.38174	6.64407	3.39301	6.49562	5.27535	10.9016	5.87735
IL-6	0.79121	1.04112	1.21397	1.14142	1.08383	0.938243	0.662519	0.810359	0.779561	0.644894	0.789457	0.561568	1.07247	1.09622	0.484656	2.13381	2.86977	3.28122	2.48998	2.10852	3.18134	2.30447	1.72325	1.66906	2.2718	3.42388	3.36483	2.74372	1.05091	2.76971
IL-10	1.16586	1.07222	0.79996	0.312949	0.622178	1.29191	1.12443	1.09202	0.889582	0.582609	0.510046	0.635163	0.421119	1.28005	0.66901	0.341203	0.467358	0.453885	0.140691	0.454925	0.280214	0.215925	0.064315	0.071724	0.137576	0.148507	0.13496	0.19179	0.200837	0.14035
TNF-α	0.907477	0.91227	1.20793	0.879913	0.663392	0.595112	0.845592	0.85799	1.45905	2.02445	0.536159	0.710661	0.444247	0.966494	0.70541	1.07791	1.42122	3.1122	2.61595	2.91649	2.62576	2.20463	1.17099	0.498696	2.87395	1.97456	1.46453	1.15904	2.94228	2.42929
