# Supplementary material
Source: Research Square preprint supplement (doi:10.21203/rs.3.rs-9239420/v1)
Supplement: Supplementary file 6 [file 8d5c5874fcca1156e5e37c51.xlsx]

## Sheet: Sheet1
Behaviour Test: Y-maze
Number	Y maze	Total	Alteration	Percentage	Percentage(%)
Control 1	BCACBCABCABCABCA	12	14	0.857143	85.7143
Control 2	ACACBCACBACBACBACBACBCAC	16	22	0.727273	72.7273
Control 3	ACBCBACBACBACABACBABCACABCBACABC	21	30	0.7	70
Control 4	BCABCACBABCACABCABCABCBABCABACBACB	25	32	0.78125	78.125
Control 5	BCABCACBCBCACABCABCABCABCACBACABACBACB	27	36	0.75	75
Control 6	CBACBACBCBACACACBABCAB	13	20	0.65	65
Control 7	ACBCABCBABCABCABCACABACBABCBA	19	27	0.703704	70.3704
Control 8	ACBCABCACABACBCABCABCBAC	16	22	0.727273	72.7273
Control 9	BCABCABCABACBACABABACBABACBACBACBCABC	27	35	0.771429	77.1429
Control 10	BCABACBCABCABCBACAB	14	17	0.823529	82.3529
Control 11	BCABCACBCABCACABCBABCABCACBCBACBCA	22	32	0.6875	68.75
Control 12	ACBABACBABCABCABCACBABCABACBABC	22	29	0.758621	75.8621
Control 13	CBACBABACBCBACBACBCABACBACB	19	25	0.76	76
Control 14	CABCBACBCABCBABCABCABCABCAB	21	25	0.84	84
Control 15	ABCABCABCACABCBACABCABCABCABACBCA	25	31	0.806452	80.6452
Control 16	CABCBCABCACACACABCBCBACBACB	14	25	0.56	56
Control 17	ACBACBABACBABCABCABCACBABCABACBCBACBACBABAC	31	41	0.756098	75.6098
Control 18	BCABCABCABCBACBABCACBACBAC	21	24	0.875	87.5
Control 19	CBACACBACABACBABACBACBCBACBABCBCABCABC	25	36	0.694444	69.4444
Control 20	BCABCBABCABCBCABCA	12	16	0.75	75
sh-Trem2 1	ABCBABACACBABABCABABACACBACBACABACAB	22	34	0.647059	64.7059
sh-Trem2 2	BCACBCABACABCBCBABABCBCABABCABCABCABACAB	24	38	0.631579	63.1579
sh-Trem2 3	ACBCABCACBCACABACBACBCBCABABACBCAB	19	32	0.59375	59.375
sh-Trem2 4	CBABCACBCABACBABCBCBACBABACBABCAB	19	31	0.612903	61.2903
sh-Trem2 5	ABCABCABABCBACABACABCACBCBCBABACBABCBAB	21	39	0.538462	53.8462
sh-Trem2 6	ACBCBACBABCBACBCBABACBCABCACBCABCABABCBA	23	38	0.605263	60.5263
sh-Trem2 7	BCBABCBACBACBACBACBCBACBCABCACABACACB	23	35	0.657143	65.7143
sh-Trem2 8	CABACABABACBABCABCBCACBABCBA	15	26	0.576923	57.6923
sh-Trem2 9	ABCABCACBCBABACBACBCBAC	14	21	0.666667	66.6667
sh-Trem2 10	BCACBCBABABCABCACBABCACACBACACBABC	18	32	0.5625	56.25
sh-Trem2 11	CABCABCACBCACABCBCABABCACBCABACBC	19	31	0.612903	61.2903
sh-Trem2 12	BCABABCBABACABCABCBABCBACBACBCBAC	19	33	0.575758	57.5758
sh-Trem2 13	ABACBCBACBCBBACABCABABCABABCACACBACAB	19	35	0.542857	54.2857
sh-Trem2 14	CABABACBCBABABCBABCABABC	12	22	0.545455	54.5455
sh-Trem2 15	ABCABCBCABABCABCABACBCBACACABACABC	20	32	0.625	62.5
sh-Trem2 16	ACBABCACABCBACABACBABCB	13	21	0.619048	61.9048
sh-Trem2 17	CBCABCBABABCBACABCACABCABCBCBACBABC	20	33	0.606061	60.6061
sh-Trem2 18	CBABACABCBACACACBACBACBCACBACACABCBA	20	34	0.588235	58.8235
sh-Trem2 19	CABCBCBCACABABCBCABACBABCACBCABCBACABCABCACB	25	42	0.595238	59.5238
sh-Trem2 20	ACBACABACBCBACBACACBABACBABACBCACABC	22	34	0.647059	64.7059
