# Supplementary material
Source: Research Square preprint supplement (doi:10.21203/rs.3.rs-9239420/v1)
Supplement: Supplementary file 7 [file a16c23bb6fa602f9b9da31ab.xlsx]

## Sheet: Sheet1
Transcription analysis shows DEGs of Trem2, CX3CR1, IRF8, CSF1, GLS and GLUL in iMG cells derived from schizophrenia patients and controls
Gene	Gene_id	Ctrl-1	Ctrl-2	Ctrl-3	Ctrl-4	Ctrl-5	Ctrl-6	Ctrl-7	Ctrl-8	Ctrl-9	Ctrl-10	Ctrl-11	Ctrl-12	Ctrl-13	Ctrl-14	Ctrl-15	Ctrl-16	Ctrl-17	Ctrl-18	SCZ-1	SCZ-2	SCZ-3	SCZ-4	SCZ-5	SCZ-6	SCZ-7	SCZ-8	SCZ-9	SCZ-10	SCZ-11	SCZ-12	SCZ-13	SCZ-14	SCZ-15	SCZ-16	SCZ-17	SCZ-18	SCZ-19	SCZ-20	SCZ-21	SCZ-22	SCZ-23	SCZ-24	SCZ-25	SCZ-26	SCZ-27	SCZ-28
Trem2	ENSG00000095970	5.66335	5.18993	6.28016	5.23436	4.87991	5.89498	5.84444	6.51353	6.25644	6.70105	4.97641	5.76757	13.6756	14.8188	13.3483	15.0405	13.4876	12.7977	NA	NA	NA	NA	NA	NA	NA	0.0637303	0.138613	0.101699	0.0705607	NA	NA	NA	3.27846	1.91088	2.65549	1.61871	2.17513	2.06698	2.05684	0.792001	1.15736	0.927127	0.602198	1.25579	0.667769	0.922075
CX3CR1	ENSG00000168329	0.300371	0.249106	0.143311	0.337497	0.350777	0.274445	0.23006	0.0417295	0.12754	0.136223	0.195181	0.256267	0.0590762	0.182815	0.176615	0.147394	0.139865	0.234366	3.25051	3.5303	3.35729	3.56143	2.90519	3.38844	3.26791	4.24702	4.17232	4.26436	4.4803	4.19948	3.97035	4.7069	2.85443	2.93315	2.94166	3.46749	3.49424	2.94635	3.18683	1.19854	1.4504	1.0437	0.88979	1.11791	1.20001	1.08686
IRF8	ENSG00000140968	28.5575	29.5988	28.6259	28.7327	29.2239	28.7145	37.6438	40.2544	36.7797	39.0815	39.9228	37.4043	12.8165	12.416	13.3543	13.2824	13.3351	13.1578	24.3916	24.463	23.1826	22.7788	24.1655	23.8476	25.3804	41.0567	39.8188	39.8927	40.6763	39.6135	41.5966	47.1404	16.4277	15.226	15.9329	16.7857	16.089	16.9751	15.3759	11.1068	9.94251	10.3417	9.76288	10.5917	9.95507	10.8228
CSF1	ENSG00000184371	6.19091	5.9255	6.05792	5.60037	6.0509	5.93823	5.73886	5.61407	5.38226	5.52099	5.13346	5.59792	3.91721	4.0336	4.38179	4.05082	4.4849	4.17398	0.802673	1.06749	1.19002	1.01243	0.722113	1.06659	0.776484	0.579541	0.456386	0.499614	0.494147	0.655279	0.328021	0.65271	2.71753	2.889	2.63115	2.46436	2.91427	2.21652	2.15818	2.7275	2.9097	2.6399	2.68563	3.01171	2.70817	2.41882
GLS	ENSG00000115419	10.1006	10.2734	9.43799	10.0023	9.89656	9.85716	12.682	13.064	12.8108	12.7736	13.4189	12.3303	11.7513	12.4238	11.7633	11.3407	11.7619	11.4378	18.386	17.3545	16.8302	17.7053	18.0288	18.7619	17.8313	18.7183	18.5501	17.8768	18.3711	17.4307	19.1606	18.3468	17.3205	18.7601	18.4234	17.0384	17.9611	19.3819	20.0771	13.7727	14.2144	14.319	13.4881	13.829	14.9506	15.2234
GLUL	ENSG00000135821	78.503	78.5689	77.2723	77.9555	78.6504	78.8532	77.8846	77.1325	77.9147	75.4362	78.7534	76.5015	91.0011	89.1187	90.4332	90.9947	91.266	89.4881	11.5385	11.4768	11.4172	11.5343	11.6784	10.9315	11.0879	12.645	13.0788	12.9662	13.1504	13.34	12.2123	11.9347	20.7857	20.1339	20.4835	20.3882	21.2304	20.2339	19.8981	8.65717	8.21747	8.30164	8.3065	7.94283	8.49931	8.75202
