# Supplementary material
Source: Research Square preprint supplement (doi:10.21203/rs.3.rs-9239420/v1)
Supplement: Supplementary file 8 [file d7ad426416d77ed32e6f7a54.xlsx]

## Sheet: Sheet1
RT-qPCR shows mRNA expression of IL-6, TNF-α and IL-10 in mPFC of mice ( 2-△△CT)
		il-6	GAPDH	△CT		△△CT	2-△△CT
control-shRNA	control-1	22.3138	15.8197	6.4941	7.00157	-0.507467	1.42155
	control-2	23.6779	15.7154	7.9625		0.960933	0.513724
	control-3	22.2343	15.6862	6.5481		-0.453467	1.36933
	control-4	23.1246	15.7578	7.3668		0.365233	0.776343
	control-5	22.2457	15.4838	6.7619		-0.239667	1.18072
	control-6	22.3917	14.9895	7.4022		0.400633	0.757526
Trem2-shRNA	Trem2-shRNA-1	21.9697	15.8448	6.1249		-0.876667	1.83613
	Trem2-shRNA-2	22.5808	15.9698	6.611		-0.390567	1.31091
	Trem2-shRNA-3	21.8865	15.6552	6.2313		-0.770267	1.70559
	Trem2-shRNA-4	21.7774	15.1182	6.6592		-0.342367	1.26783
	Trem2-shRNA-5	21.5695	14.8821	6.6874		-0.314167	1.24329
	Trem2-shRNA-6	21.0775	15.0666	6.0109		-0.990667	1.9871
		TNF-α	GAPDH	△CT		△△CT	2-△△CT
control-shRNA	control-1	22.985	15.8197	7.1653	6.74653	0.418767	0.748064
	control-2	22.136	15.7154	6.4206		-0.325933	1.25348
	control-3	22.3399	15.6862	6.6537		-0.0928333	1.06646
	control-4	22.0907	15.8612	6.2295		-0.517033	1.43101
	control-5	22.0729	15.8929	6.18		-0.566533	1.48096
	control-6	22.2314	15.7879	6.4435		-0.303033	1.23374
Trem2-shRNA	Trem2-shRNA-1	21.6176	15.8448	5.7728		-0.973733	1.96392
	Trem2-shRNA-2	21.7233	15.9698	5.7535		-0.993033	1.99037
	Trem2-shRNA-3	21.573	15.6552	5.9178		-0.828733	1.77613
	Trem2-shRNA-4	21.8301	16.1267	5.7034		-1.04313	2.0607
	Trem2-shRNA-5	21.4495	15.7748	5.6747		-1.07183	2.1021
	Trem2-shRNA-6	21.7216	15.6927	6.0289		-0.717633	1.64448
		il-10	GAPDH	△CT		△△CT	2-△△CT
control-shRNA	control-1	35.2636	15.8197	19.4439	19.3679	0.076	0.948684
	control-2	35.6879	15.7154	19.9725		0.6046	0.657654
	control-3	34.3735	15.6862	18.6873		-0.6806	1.60281
	control-4	34.5763	15.7578	18.8185		-0.5494	1.46348
	control-5	34.9102	15.4838	19.4264		0.0585	0.960262
	control-6	34.0447	14.9895	19.0552		-0.3127	1.24203
Trem2-shRNA	Trem2-shRNA-1	36.4141	15.8448	20.5693		1.2014	0.434853
	Trem2-shRNA-2	36.1765	15.9698	20.2067		0.8388	0.559108
	Trem2-shRNA-3	36.0775	15.6552	20.4223		1.0544	0.481497
	Trem2-shRNA-4	35.5924	15.1182	20.4742		1.1063	0.464484
	Trem2-shRNA-5	34.0696	14.8821	19.1875		-0.1804	1.1332
	Trem2-shRNA-6	34.6982	15.0666	19.6316		0.2637	0.832949
