# Supplementary material
Source: Research Square preprint supplement (doi:10.21203/rs.3.rs-9239420/v1)
Supplement: Supplementary file 9 [file d9a82be648c733db46a21d7d.xlsx]

## Sheet: Sheet1
Beheviour Test: Open Filed Test
Experient of OFT	Total distance	center			corner
Experient Name	Total distance(mm)	Center distance(mm)	Center time(s)	Entries in center	Corner distance(mm)	Center time(s)	Entries in corner	Rest time (s)
Control 1	2788.46	195.59	17.69	11	1631.08	201.94	35	37.81
Control 2	4661.96	145.08	3.75	10	2742.21	223.76	57	20.37
Control 3	4770.95	663.42	27.81	34	2218.38	175.68	46	14.87
Control 4	2802.08	195.74	5.12	9	1519.16	218.75	32	96.49
Control 5	3534.88	251.93	11	10	1890.91	187.81	48	41.93
Control 6	3486.7	197.13	11.75	12	1962.1	200.62	54	35.06
Control 7	3748.07	339.03	16.62	20	1960.99	176.2	49	23.56
Control 8	5639.07	412.24	6.88	20	3045.35	207.95	62	20
Control 9	5068.82	457.88	18.56	22	2557.3	173.75	68	12.38
Control 10	3677.73	177.18	6.25	11	2107.46	207.2	58	39.94
Control 11	1300.14	49	0.69	4	871.42	246.99	22	147.25
Control 12	4440.79	46.5	2	6	2739.73	214.13	94	15.2
Control 13	4195.22	189.29	6.75	14	2233.42	177.38	96	16.44
Control 14	4280.69	40.19	1.81	3	2520.01	202.63	98	21.5
Control 15	3282.37	18	0.81	1	2073.67	224.13	71	43.93
Control 16	3555.14	209.59	9.06	17	1785.98	191.94	74	39.38
Control 17	5613.63	37.2	1.19	3	3334.77	214.26	136	30.56
Control 18	2951.9	236.11	10.69	25	1459.66	187.8	56	36.44
Control 19	6404.67	69.44	2.37	7	3314.12	172.76	177	12.12
Control 20	4637.58	165.43	7.25	13	2446.62	194.7	107	27.01
shTrem2 1	1272.44	19.33	0.38	2	910.39	265.25	24	154.57
shTrem2 2	2637.04	56.26	2.12	5	1617.74	208.68	56	41.01
shTrem2 3	2893.85	256.2	5.94	28	1252.65	133.94	69	13.12
shTrem2 4	3713.77	61.98	0.63	14	2092.74	174.06	88	35.81
shTrem2 5	4157.92	306.37	11.62	26	1944.01	178.18	99	36.44
shTrem2 6	3100.79	119.64	4.13	10	1612.38	184.32	68	54.69
shTrem2 7	2902.25	172.6	6.81	12	1537.56	187.69	68	37.87
shTrem2 8	5063.23	379.14	16.81	33	2298.53	171.81	111	36.57
shTrem2 9	4595.44	446.14	15.81	31	2279.42	152.18	100	12.38
shTrem2 10	5608.35	130.86	5.81	10	3158.65	199.76	125	29.69
shTrem2 11	5292.14	476.66	13.19	20	2778.13	200	61	21.93
shTrem2 12	5578.21	200.84	6.62	11	3290.58	212.37	75	12.75
shTrem2 13	5146.77	304.84	11.38	11	2755.15	203.69	75	18.93
shTrem2 14	3947.48	297.24	13.06	13	2134.65	207.45	53	40.13
shTrem2 15	3965.35	314.54	14.06	19	2227.27	197.62	42	20.32
shTrem2 16	4770.95	663.42	27.81	34	2218.38	175.68	46	14.87
shTrem2 17	3534.88	251.93	11	10	1890.91	187.81	48	41.93
shTrem2 18	5639.07	412.24	6.88	20	3045.35	207.95	62	20
shTrem2 19	3677.73	177.18	6.25	11	2107.46	207.2	58	39.94
shTrem2 20	5146.77	304.84	11.38	11	2755.15	203.69	75	18.93
