# Supplementary material
Source: Research Square preprint supplement (doi:10.21203/rs.3.rs-9239420/v1)
Supplement: Supplementary file 10 [file f5cba10bd9ee27167c340fad.xlsx]

## Sheet: DEG-UP-KEGG-enriched
DEGs Upregulated KEGG Enriched Result of iMG cells derived from schizophrenia patients and controls
ID	Description	Test	TestAll	Ref	RefAll	Pvalue	FDR	richFactor	Gene_id	KEGG_id	URL
hsa04060	Cytokine-cytokine receptor interaction	78	1268	275	7681	3.58946e-07	0.000127067	0.283636	ENSG00000125845(BMP2)|ENSG00000205755(CRLF2)|ENSG00000158813(EDA)|ENSG00000127863(TNFRSF19)|ENSG00000172179(PRL)|ENSG00000171855(IFNB1)|ENSG00000186827(TNFRSF4)|ENSG00000102245(CD40LG)|ENSG00000277632(CCL3)|ENSG00000103522(IL21R)|ENSG00000159958(TNFRSF13C)|ENSG00000275302(CCL4)|ENSG00000276085(CCL3L1)|ENSG00000276085(CCL3L1)|ENSG00000179934(CCR8)|ENSG00000127318(IL22)|ENSG00000126353(CCR7)|ENSG00…	hsa:650|hsa:64109|hsa:1896|hsa:55504|hsa:5617|hsa:3456|hsa:7293|hsa:959|hsa:6348|hsa:50615|hsa:115650|hsa:6351|hsa:6349|hsa:414062|hsa:1237|hsa:50616|hsa:1236|hsa:55801|hsa:9560|hsa:388372|hsa:151449|hsa:5473|hsa:3572|hsa:5618|hsa:5197|hsa:112744|hsa:27189|hsa:6387|hsa:7048|hsa:3605|hsa:56477|hsa:643|hsa:5196|hsa:8743|hsa:3593|hsa:3553|hsa:282618|hsa:56300|hsa:3577|hsa:7850|hsa:3590|hsa:6369|hsa:…	http://www.kegg.jp/kegg-bin/show_pathway?hsa04060+hsa:650+hsa:64109+hsa:1896+hsa:55504+hsa:5617+hsa:3456+hsa:7293+hsa:959+hsa:6348+hsa:50615+hsa:115650+hsa:6351+hsa:6349+hsa:414062+hsa:1237+hsa:50616+hsa:1236+hsa:55801+hsa:9560+hsa:388372+hsa:151449+hsa:5473+hsa:3572+hsa:5618+hsa:5197+hsa:112744+hsa:27189+hsa:6387+hsa:7048+hsa:3605+hsa:56477+hsa:643+hsa:5196+hsa:8743+hsa:3593+hsa:3553+hsa:282618+…
hsa04640	Hematopoietic cell lineage	34	1268	96	7681	4.86383e-06	0.000860897	0.354167	ENSG00000198502(HLA-DRB5)|ENSG00000179344(HLA-DQB1)|ENSG00000107447(DNTT)|ENSG00000164171(ITGA2)|ENSG00000172116(CD8B)|ENSG00000049130(KITLG)|ENSG00000012124(CD22)|ENSG00000125538(IL1B)|ENSG00000115590(IL1R2)|ENSG00000137070(IL11RA)|ENSG00000232810(TNF)|ENSG00000198851(CD3E)|ENSG00000004468(CD38)|ENSG00000090554(FLT3LG)|ENSG00000259207(ITGB3)|ENSG00000178732(GP5)|ENSG00000173762(CD7)|ENSG00000156…	hsa:3127|hsa:3119|hsa:1791|hsa:3673|hsa:926|hsa:4254|hsa:933|hsa:3553|hsa:7850|hsa:3590|hsa:7124|hsa:916|hsa:952|hsa:2323|hsa:3690|hsa:2814|hsa:924|hsa:931|hsa:927|hsa:921|hsa:947|hsa:3568|hsa:2815|hsa:1604|hsa:925|hsa:3674|hsa:909|hsa:911|hsa:910|hsa:913|hsa:1378|hsa:3676|hsa:3655|hsa:1441	http://www.kegg.jp/kegg-bin/show_pathway?hsa04640+hsa:3127+hsa:3119+hsa:1791+hsa:3673+hsa:926+hsa:4254+hsa:933+hsa:3553+hsa:7850+hsa:3590+hsa:7124+hsa:916+hsa:952+hsa:2323+hsa:3690+hsa:2814+hsa:924+hsa:931+hsa:927+hsa:921+hsa:947+hsa:3568+hsa:2815+hsa:1604+hsa:925+hsa:3674+hsa:909+hsa:911+hsa:910+hsa:913+hsa:1378+hsa:3676+hsa:3655+hsa:1441
hsa05146	Amoebiasis	32	1268	100	7681	9.19804e-05	0.0108537	0.32	ENSG00000242550(SERPINB10)|ENSG00000182621(PLCB1)|ENSG00000164742(ADCY1)|ENSG00000171608(PIK3CD)|ENSG00000141404(GNAL)|ENSG00000197641(SERPINB13)|ENSG00000101333(PLCB4)|ENSG00000035403(VCL)|ENSG00000154229(PRKCA)|ENSG00000145675(PIK3R1)|ENSG00000118520(ARG1)|ENSG00000113302(IL12B)|ENSG00000169398(PTK2)|ENSG00000125538(IL1B)|ENSG00000170542(SERPINB9)|ENSG00000081181(ARG2)|ENSG00000100448(CTSG)|ENS…	hsa:5273|hsa:23236|hsa:107|hsa:5293|hsa:2774|hsa:5275|hsa:5332|hsa:7414|hsa:5578|hsa:5295|hsa:383|hsa:3593|hsa:5747|hsa:3553|hsa:5272|hsa:384|hsa:1511|hsa:7850|hsa:3912|hsa:7124|hsa:7040|hsa:5567|hsa:5579|hsa:4790|hsa:1277|hsa:909|hsa:911|hsa:910|hsa:913|hsa:2335|hsa:1285|hsa:1286	http://www.kegg.jp/kegg-bin/show_pathway?hsa05146+hsa:5273+hsa:23236+hsa:107+hsa:5293+hsa:2774+hsa:5275+hsa:5332+hsa:7414+hsa:5578+hsa:5295+hsa:383+hsa:3593+hsa:5747+hsa:3553+hsa:5272+hsa:384+hsa:1511+hsa:7850+hsa:3912+hsa:7124+hsa:7040+hsa:5567+hsa:5579+hsa:4790+hsa:1277+hsa:909+hsa:911+hsa:910+hsa:913+hsa:2335+hsa:1285+hsa:1286
hsa05202	Transcriptional misregulation in cancer	51	1268	188	7681	0.000135314	0.0119753	0.271277	ENSG00000102755(FLT1)|ENSG00000157554(ERG)|ENSG00000171988(JMJD1C)|ENSG00000104885(DOT1L)|ENSG00000184012(TMPRSS2)|ENSG00000164821(DEFA4)|ENSG00000196092(PAX5)|ENSG00000278828(H3C10)|ENSG00000033170(FUT8)|ENSG00000239839(DEFA3)|ENSG00000129315(CCNT1)|ENSG00000127152(BCL11B)|ENSG00000175832(ETV4)|ENSG00000173801(JUP)|ENSG00000144802(NFKBIZ)|ENSG00000109787(KLF3)|ENSG00000139318(DUSP6)|ENSG00000163…	hsa:2321|hsa:2078|hsa:221037|hsa:84444|hsa:7113|hsa:1669|hsa:5079|hsa:8357|hsa:2530|hsa:1668|hsa:904|hsa:64919|hsa:2118|hsa:3728|hsa:64332|hsa:51274|hsa:1848|hsa:7048|hsa:4297|hsa:4300|hsa:7185|hsa:4609|hsa:51384|hsa:4211|hsa:3480|hsa:5747|hsa:25942|hsa:7403|hsa:171558|hsa:3248|hsa:7850|hsa:8358|hsa:8842|hsa:890|hsa:4208|hsa:4149|hsa:8938|hsa:4616|hsa:6935|hsa:1667|hsa:3486|hsa:4790|hsa:3206|hsa:…	http://www.kegg.jp/kegg-bin/show_pathway?hsa05202+hsa:2321+hsa:2078+hsa:221037+hsa:84444+hsa:7113+hsa:1669+hsa:5079+hsa:8357+hsa:2530+hsa:1668+hsa:904+hsa:64919+hsa:2118+hsa:3728+hsa:64332+hsa:51274+hsa:1848+hsa:7048+hsa:4297+hsa:4300+hsa:7185+hsa:4609+hsa:51384+hsa:4211+hsa:3480+hsa:5747+hsa:25942+hsa:7403+hsa:171558+hsa:3248+hsa:7850+hsa:8358+hsa:8842+hsa:890+hsa:4208+hsa:4149+hsa:8938+hsa:4616…
hsa04514	Cell adhesion molecules	42	1268	149	7681	0.000210464	0.0147216	0.281879	ENSG00000134873(CLDN10)|ENSG00000150637(CD226)|ENSG00000179242(CDH4)|ENSG00000105426(PTPRS)|ENSG00000165300(SLITRK5)|ENSG00000102245(CD40LG)|ENSG00000198502(HLA-DRB5)|ENSG00000179344(HLA-DQB1)|ENSG00000091129(NRCAM)|ENSG00000038427(VCAN)|ENSG00000067141(NEO1)|ENSG00000196358(NTNG2)|ENSG00000184113(CLDN5)|ENSG00000144847(IGSF11)|ENSG00000172116(CD8B)|ENSG00000166086(JAM3)|ENSG00000172260(NEGR1)|EN…	hsa:9071|hsa:10666|hsa:1002|hsa:5802|hsa:26050|hsa:959|hsa:3127|hsa:3119|hsa:4897|hsa:1462|hsa:4756|hsa:84628|hsa:7122|hsa:152404|hsa:926|hsa:83700|hsa:257194|hsa:90952|hsa:54413|hsa:933|hsa:49861|hsa:26047|hsa:29851|hsa:5010|hsa:6401|hsa:6402|hsa:1493|hsa:5789|hsa:1001|hsa:999|hsa:6403|hsa:5788|hsa:940|hsa:23705|hsa:927|hsa:947|hsa:925|hsa:4359|hsa:3676|hsa:5133|hsa:3655|hsa:22854	http://www.kegg.jp/kegg-bin/show_pathway?hsa04514+hsa:9071+hsa:10666+hsa:1002+hsa:5802+hsa:26050+hsa:959+hsa:3127+hsa:3119+hsa:4897+hsa:1462+hsa:4756+hsa:84628+hsa:7122+hsa:152404+hsa:926+hsa:83700+hsa:257194+hsa:90952+hsa:54413+hsa:933+hsa:49861+hsa:26047+hsa:29851+hsa:5010+hsa:6401+hsa:6402+hsa:1493+hsa:5789+hsa:1001+hsa:999+hsa:6403+hsa:5788+hsa:940+hsa:23705+hsa:927+hsa:947+hsa:925+hsa:4359+h…
hsa04820	Cytoskeleton in muscle cells	58	1268	226	7681	0.000249519	0.0147216	0.256637	ENSG00000139734(DIAPH3)|ENSG00000100242(SUN2)|ENSG00000142173(COL6A2)|ENSG00000151150(ANK3)|ENSG00000137801(THBS1)|ENSG00000107438(PDLIM1)|ENSG00000101335(MYL9)|ENSG00000134769(DTNA)|ENSG00000038427(VCAN)|ENSG00000086967(MYBPC2)|ENSG00000164171(ITGA2)|ENSG00000127990(SGCE)|ENSG00000101470(TNNC2)|ENSG00000173801(JUP)|ENSG00000144821(MYH15)|ENSG00000198336(MYL4)|ENSG00000196091(MYBPC1)|ENSG00000035…	hsa:81624|hsa:25777|hsa:1292|hsa:288|hsa:7057|hsa:9124|hsa:10398|hsa:1837|hsa:1462|hsa:4606|hsa:3673|hsa:8910|hsa:7125|hsa:3728|hsa:22989|hsa:4635|hsa:4604|hsa:7414|hsa:7169|hsa:6711|hsa:23224|hsa:255631|hsa:7140|hsa:2274|hsa:10529|hsa:9499|hsa:131873|hsa:8515|hsa:51778|hsa:477|hsa:29765|hsa:3690|hsa:4629|hsa:57731|hsa:480|hsa:161176|hsa:9172|hsa:4628|hsa:27295|hsa:6444|hsa:476|hsa:1302|hsa:1297|…	http://www.kegg.jp/kegg-bin/show_pathway?hsa04820+hsa:81624+hsa:25777+hsa:1292+hsa:288+hsa:7057+hsa:9124+hsa:10398+hsa:1837+hsa:1462+hsa:4606+hsa:3673+hsa:8910+hsa:7125+hsa:3728+hsa:22989+hsa:4635+hsa:4604+hsa:7414+hsa:7169+hsa:6711+hsa:23224+hsa:255631+hsa:7140+hsa:2274+hsa:10529+hsa:9499+hsa:131873+hsa:8515+hsa:51778+hsa:477+hsa:29765+hsa:3690+hsa:4629+hsa:57731+hsa:480+hsa:161176+hsa:9172+hsa:…
hsa04024	cAMP signaling pathway	54	1268	215	7681	0.000705749	0.0249835	0.251163	ENSG00000128271(ADORA2A)|ENSG00000157087(ATP2B2)|ENSG00000133818(RRAS2)|ENSG00000078401(EDN1)|ENSG00000164742(ADCY1)|ENSG00000112164(GLP1R)|ENSG00000058404(CAMK2B)|ENSG00000152270(PDE3B)|ENSG00000171608(PIK3CD)|ENSG00000101335(MYL9)|ENSG00000101405(OXT)|ENSG00000131771(PPP1R1B)|ENSG00000113448(PDE4D)|ENSG00000138039(LHCGR)|ENSG00000043591(ADRB1)|ENSG00000152495(CAMK4)|ENSG00000152578(GRIA4)|ENSG0…	hsa:135|hsa:491|hsa:22800|hsa:1906|hsa:107|hsa:2740|hsa:816|hsa:5140|hsa:5293|hsa:10398|hsa:5020|hsa:84152|hsa:5144|hsa:3973|hsa:153|hsa:814|hsa:2893|hsa:2770|hsa:5142|hsa:5350|hsa:51196|hsa:2902|hsa:2905|hsa:5295|hsa:10451|hsa:64399|hsa:7434|hsa:208|hsa:673|hsa:11069|hsa:2735|hsa:51738|hsa:4792|hsa:477|hsa:3360|hsa:5602|hsa:818|hsa:54714|hsa:5727|hsa:1259|hsa:480|hsa:5139|hsa:2867|hsa:6262|hsa:1…	http://www.kegg.jp/kegg-bin/show_pathway?hsa04024+hsa:135+hsa:491+hsa:22800+hsa:1906+hsa:107+hsa:2740+hsa:816+hsa:5140+hsa:5293+hsa:10398+hsa:5020+hsa:84152+hsa:5144+hsa:3973+hsa:153+hsa:814+hsa:2893+hsa:2770+hsa:5142+hsa:5350+hsa:51196+hsa:2902+hsa:2905+hsa:5295+hsa:10451+hsa:64399+hsa:7434+hsa:208+hsa:673+hsa:11069+hsa:2735+hsa:51738+hsa:4792+hsa:477+hsa:3360+hsa:5602+hsa:818+hsa:54714+hsa:5727…
hsa04062	Chemokine signaling pathway	49	1268	189	7681	0.000574254	0.0249835	0.259259	ENSG00000182621(PLCB1)|ENSG00000186469(GNG2)|ENSG00000164742(ADCY1)|ENSG00000277632(CCL3)|ENSG00000171608(PIK3CD)|ENSG00000275302(CCL4)|ENSG00000276085(CCL3L1)|ENSG00000276085(CCL3L1)|ENSG00000179934(CCR8)|ENSG00000126353(CCR7)|ENSG00000276070(CCL4L2)|ENSG00000276070(CCL4L2)|ENSG00000101333(PLCB4)|ENSG00000127920(GNG11)|ENSG00000163736(PPBP)|ENSG00000198873(GRK5)|ENSG00000109272(PF4V1)|ENSG000001…	hsa:23236|hsa:54331|hsa:107|hsa:6348|hsa:5293|hsa:6351|hsa:6349|hsa:414062|hsa:1237|hsa:1236|hsa:9560|hsa:388372|hsa:5332|hsa:2791|hsa:5473|hsa:2869|hsa:5197|hsa:56288|hsa:2770|hsa:6387|hsa:5335|hsa:56477|hsa:643|hsa:5196|hsa:5295|hsa:10451|hsa:10235|hsa:5747|hsa:208|hsa:94235|hsa:673|hsa:3577|hsa:6369|hsa:1235|hsa:6846|hsa:3718|hsa:4792|hsa:1524|hsa:6375|hsa:3702|hsa:10681|hsa:5567|hsa:5579|hsa:…	http://www.kegg.jp/kegg-bin/show_pathway?hsa04062+hsa:23236+hsa:54331+hsa:107+hsa:6348+hsa:5293+hsa:6351+hsa:6349+hsa:414062+hsa:1237+hsa:1236+hsa:9560+hsa:388372+hsa:5332+hsa:2791+hsa:5473+hsa:2869+hsa:5197+hsa:56288+hsa:2770+hsa:6387+hsa:5335+hsa:56477+hsa:643+hsa:5196+hsa:5295+hsa:10451+hsa:10235+hsa:5747+hsa:208+hsa:94235+hsa:673+hsa:3577+hsa:6369+hsa:1235+hsa:6846+hsa:3718+hsa:4792+hsa:1524+…
hsa04512	ECM-receptor interaction	27	1268	87	7681	0.000549242	0.0249835	0.310345	ENSG00000142173(COL6A2)|ENSG00000168477(TNXB)|ENSG00000137801(THBS1)|ENSG00000041982(TNC)|ENSG00000164171(ITGA2)|ENSG00000088053(GP6)|ENSG00000164946(FREM1)|ENSG00000206384(COL6A6)|ENSG00000143127(ITGA10)|ENSG00000122012(SV2C)|ENSG00000091136(LAMB1)|ENSG00000116147(TNR)|ENSG00000109072(VTN)|ENSG00000259207(ITGB3)|ENSG00000178732(GP5)|ENSG00000112280(COL9A1)|ENSG00000152592(DMP1)|ENSG00000169704(G…	hsa:1292|hsa:7148|hsa:7057|hsa:3371|hsa:3673|hsa:51206|hsa:158326|hsa:131873|hsa:8515|hsa:22987|hsa:3912|hsa:7143|hsa:7448|hsa:3690|hsa:2814|hsa:1297|hsa:1758|hsa:2815|hsa:3693|hsa:1277|hsa:3674|hsa:2335|hsa:3676|hsa:1285|hsa:1286|hsa:3655|hsa:3339	http://www.kegg.jp/kegg-bin/show_pathway?hsa04512+hsa:1292+hsa:7148+hsa:7057+hsa:3371+hsa:3673+hsa:51206+hsa:158326+hsa:131873+hsa:8515+hsa:22987+hsa:3912+hsa:7143+hsa:7448+hsa:3690+hsa:2814+hsa:1297+hsa:1758+hsa:2815+hsa:3693+hsa:1277+hsa:3674+hsa:2335+hsa:3676+hsa:1285+hsa:1286+hsa:3655+hsa:3339
hsa05205	Proteoglycans in cancer	50	1268	195	7681	0.000665969	0.0249835	0.25641	ENSG00000154764(WNT7A)|ENSG00000133818(RRAS2)|ENSG00000151150(ANK3)|ENSG00000100234(TIMP3)|ENSG00000058404(CAMK2B)|ENSG00000147257(GPC3)|ENSG00000096433(ITPR3)|ENSG00000137801(THBS1)|ENSG00000171608(PIK3CD)|ENSG00000185386(MAPK11)|ENSG00000164171(ITGA2)|ENSG00000108379(WNT3)|ENSG00000075290(WNT8B)|ENSG00000138193(PLCE1)|ENSG00000124181(PLCG1)|ENSG00000090447(TFAP4)|ENSG00000154229(PRKCA)|ENSG0000…	hsa:7476|hsa:22800|hsa:288|hsa:7078|hsa:816|hsa:2719|hsa:3710|hsa:7057|hsa:5293|hsa:5600|hsa:3673|hsa:7473|hsa:7479|hsa:51196|hsa:5335|hsa:7023|hsa:5578|hsa:4609|hsa:51384|hsa:5295|hsa:10451|hsa:3480|hsa:3593|hsa:5747|hsa:208|hsa:286|hsa:388112|hsa:673|hsa:7430|hsa:7124|hsa:356|hsa:4060|hsa:7480|hsa:7471|hsa:818|hsa:7448|hsa:5727|hsa:3690|hsa:6199|hsa:2260|hsa:7040|hsa:3091|hsa:3791|hsa:5567|hsa:…	http://www.kegg.jp/kegg-bin/show_pathway?hsa05205+hsa:7476+hsa:22800+hsa:288+hsa:7078+hsa:816+hsa:2719+hsa:3710+hsa:7057+hsa:5293+hsa:5600+hsa:3673+hsa:7473+hsa:7479+hsa:51196+hsa:5335+hsa:7023+hsa:5578+hsa:4609+hsa:51384+hsa:5295+hsa:10451+hsa:3480+hsa:3593+hsa:5747+hsa:208+hsa:286+hsa:388112+hsa:673+hsa:7430+hsa:7124+hsa:356+hsa:4060+hsa:7480+hsa:7471+hsa:818+hsa:7448+hsa:5727+hsa:3690+hsa:6199…
hsa04015	Rap1 signaling pathway	50	1268	203	7681	0.00172418	0.0299958	0.246305	ENSG00000102678(FGF9)|ENSG00000102755(FLT1)|ENSG00000182621(PLCB1)|ENSG00000178184(PARD6G)|ENSG00000128271(ADORA2A)|ENSG00000164742(ADCY1)|ENSG00000077420(APBB1IP)|ENSG00000137801(THBS1)|ENSG00000171608(PIK3CD)|ENSG00000185386(MAPK11)|ENSG00000196405(EVL)|ENSG00000101333(PLCB4)|ENSG00000170962(PDGFD)|ENSG00000148498(PARD3)|ENSG00000127955(GNAI1)|ENSG00000138798(EGF)|ENSG00000138193(PLCE1)|ENSG000…	hsa:2254|hsa:2321|hsa:23236|hsa:84552|hsa:135|hsa:107|hsa:54518|hsa:7057|hsa:5293|hsa:5600|hsa:51466|hsa:5332|hsa:80310|hsa:56288|hsa:2770|hsa:1950|hsa:51196|hsa:4254|hsa:5335|hsa:5578|hsa:2902|hsa:5295|hsa:10451|hsa:10235|hsa:5606|hsa:27040|hsa:8631|hsa:3480|hsa:9693|hsa:208|hsa:2775|hsa:673|hsa:11069|hsa:5159|hsa:57121|hsa:284|hsa:3937|hsa:3690|hsa:2263|hsa:2260|hsa:51735|hsa:999|hsa:3791|hsa:2…	http://www.kegg.jp/kegg-bin/show_pathway?hsa04015+hsa:2254+hsa:2321+hsa:23236+hsa:84552+hsa:135+hsa:107+hsa:54518+hsa:7057+hsa:5293+hsa:5600+hsa:51466+hsa:5332+hsa:80310+hsa:56288+hsa:2770+hsa:1950+hsa:51196+hsa:4254+hsa:5335+hsa:5578+hsa:2902+hsa:5295+hsa:10451+hsa:10235+hsa:5606+hsa:27040+hsa:8631+hsa:3480+hsa:9693+hsa:208+hsa:2775+hsa:673+hsa:11069+hsa:5159+hsa:57121+hsa:284+hsa:3937+hsa:3690+…
hsa04061	Viral protein interaction with cytokine and cytokine receptor	28	1268	97	7681	0.0015406	0.0299958	0.28866	ENSG00000277632(CCL3)|ENSG00000275302(CCL4)|ENSG00000276085(CCL3L1)|ENSG00000276085(CCL3L1)|ENSG00000179934(CCR8)|ENSG00000126353(CCR7)|ENSG00000276070(CCL4L2)|ENSG00000276070(CCL4L2)|ENSG00000163736(PPBP)|ENSG00000134352(IL6ST)|ENSG00000109272(PF4V1)|ENSG00000107562(CXCL12)|ENSG00000151882(CCL28)|ENSG00000160683(CXCR5)|ENSG00000163737(PF4)|ENSG00000121858(TNFSF10)|ENSG00000163464(CXCR1)|ENSG0000…	hsa:6348|hsa:6351|hsa:6349|hsa:414062|hsa:1237|hsa:1236|hsa:9560|hsa:388372|hsa:5473|hsa:3572|hsa:5197|hsa:6387|hsa:56477|hsa:643|hsa:5196|hsa:8743|hsa:3577|hsa:6369|hsa:1235|hsa:4049|hsa:7124|hsa:6846|hsa:1524|hsa:146433|hsa:6375|hsa:6373|hsa:10803|hsa:6352	http://www.kegg.jp/kegg-bin/show_pathway?hsa04061+hsa:6348+hsa:6351+hsa:6349+hsa:414062+hsa:1237+hsa:1236+hsa:9560+hsa:388372+hsa:5473+hsa:3572+hsa:5197+hsa:6387+hsa:56477+hsa:643+hsa:5196+hsa:8743+hsa:3577+hsa:6369+hsa:1235+hsa:4049+hsa:7124+hsa:6846+hsa:1524+hsa:146433+hsa:6375+hsa:6373+hsa:10803+hsa:6352
hsa04110	Cell cycle	41	1268	158	7681	0.001535	0.0299958	0.259494	ENSG00000080986(NDC80)|ENSG00000077935(SMC1B)|ENSG00000129810(SGO1)|ENSG00000171320(ESCO2)|ENSG00000080839(RBL1)|ENSG00000146670(CDCA5)|ENSG00000093009(CDC45)|ENSG00000094804(CDC6)|ENSG00000101412(E2F1)|ENSG00000081377(CDC14B)|ENSG00000250254(PTTG2)|ENSG00000167513(CDT1)|ENSG00000133740(E2F5)|ENSG00000105173(CCNE1)|ENSG00000127564(PKMYT1)|ENSG00000118007(STAG1)|ENSG00000112742(TTK)|ENSG0000013699…	hsa:10403|hsa:27127|hsa:151648|hsa:157570|hsa:5933|hsa:113130|hsa:8318|hsa:990|hsa:1869|hsa:8555|hsa:10744|hsa:81620|hsa:1875|hsa:898|hsa:9088|hsa:10274|hsa:7272|hsa:4609|hsa:29882|hsa:4176|hsa:545|hsa:701|hsa:57082|hsa:4175|hsa:5347|hsa:890|hsa:4616|hsa:4088|hsa:7029|hsa:9212|hsa:7040|hsa:1032|hsa:5934|hsa:80174|hsa:995|hsa:1870|hsa:896|hsa:993|hsa:472|hsa:699|hsa:991	http://www.kegg.jp/kegg-bin/show_pathway?hsa04110+hsa:10403+hsa:27127+hsa:151648+hsa:157570+hsa:5933+hsa:113130+hsa:8318+hsa:990+hsa:1869+hsa:8555+hsa:10744+hsa:81620+hsa:1875+hsa:898+hsa:9088+hsa:10274+hsa:7272+hsa:4609+hsa:29882+hsa:4176+hsa:545+hsa:701+hsa:57082+hsa:4175+hsa:5347+hsa:890+hsa:4616+hsa:4088+hsa:7029+hsa:9212+hsa:7040+hsa:1032+hsa:5934+hsa:80174+hsa:995+hsa:1870+hsa:896+hsa:993+h…
hsa04611	Platelet activation	33	1268	121	7681	0.00177941	0.0299958	0.272727	ENSG00000182621(PLCB1)|ENSG00000108405(P2RX1)|ENSG00000164742(ADCY1)|ENSG00000077420(APBB1IP)|ENSG00000096433(ITPR3)|ENSG00000171608(PIK3CD)|ENSG00000172575(RASGRP1)|ENSG00000185386(MAPK11)|ENSG00000095303(PTGS1)|ENSG00000101333(PLCB4)|ENSG00000164171(ITGA2)|ENSG00000127955(GNAI1)|ENSG00000185532(PRKG1)|ENSG00000088053(GP6)|ENSG00000145675(PIK3R1)|ENSG00000068831(RASGRP2)|ENSG00000105221(AKT2)|EN…	hsa:23236|hsa:5023|hsa:107|hsa:54518|hsa:3710|hsa:5293|hsa:10125|hsa:5600|hsa:5742|hsa:5332|hsa:3673|hsa:2770|hsa:5592|hsa:51206|hsa:5295|hsa:10235|hsa:208|hsa:2534|hsa:5739|hsa:4638|hsa:3937|hsa:3690|hsa:2982|hsa:2983|hsa:2814|hsa:5567|hsa:6915|hsa:9002|hsa:2815|hsa:5593|hsa:1277|hsa:3674|hsa:64805	http://www.kegg.jp/kegg-bin/show_pathway?hsa04611+hsa:23236+hsa:5023+hsa:107+hsa:54518+hsa:3710+hsa:5293+hsa:10125+hsa:5600+hsa:5742+hsa:5332+hsa:3673+hsa:2770+hsa:5592+hsa:51206+hsa:5295+hsa:10235+hsa:208+hsa:2534+hsa:5739+hsa:4638+hsa:3937+hsa:3690+hsa:2982+hsa:2983+hsa:2814+hsa:5567+hsa:6915+hsa:9002+hsa:2815+hsa:5593+hsa:1277+hsa:3674+hsa:64805
hsa04650	Natural killer cell mediated cytotoxicity	33	1268	118	7681	0.00112249	0.0299958	0.279661	ENSG00000171855(IFNB1)|ENSG00000134539(KLRD1)|ENSG00000213809(KLRK1)|ENSG00000213809(KLRK1)|ENSG00000180644(PRF1)|ENSG00000171608(PIK3CD)|ENSG00000243772(KIR2DL3)|ENSG00000125498(KIR2DL1)|ENSG00000167633(KIR3DL1)|ENSG00000221957(KIR2DS4)|ENSG00000240403(KIR3DL2)|ENSG00000189430(NCR1)|ENSG00000124181(PLCG1)|ENSG00000154229(PRKCA)|ENSG00000121858(TNFSF10)|ENSG00000145675(PIK3R1)|ENSG00000134215(VAV…	hsa:3456|hsa:3824|hsa:22914|hsa:100528032|hsa:5551|hsa:5293|hsa:3804|hsa:3802|hsa:3811|hsa:3809|hsa:3812|hsa:9437|hsa:5335|hsa:5578|hsa:8743|hsa:5295|hsa:10451|hsa:27040|hsa:2534|hsa:673|hsa:3823|hsa:7124|hsa:356|hsa:117157|hsa:3937|hsa:3442|hsa:3821|hsa:5579|hsa:51744|hsa:25759|hsa:7535|hsa:2215|hsa:919	http://www.kegg.jp/kegg-bin/show_pathway?hsa04650+hsa:3456+hsa:3824+hsa:22914+hsa:100528032+hsa:5551+hsa:5293+hsa:3804+hsa:3802+hsa:3811+hsa:3809+hsa:3812+hsa:9437+hsa:5335+hsa:5578+hsa:8743+hsa:5295+hsa:10451+hsa:27040+hsa:2534+hsa:673+hsa:3823+hsa:7124+hsa:356+hsa:117157+hsa:3937+hsa:3442+hsa:3821+hsa:5579+hsa:51744+hsa:25759+hsa:7535+hsa:2215+hsa:919
hsa04660	T cell receptor signaling pathway	33	1268	120	7681	0.0015308	0.0299958	0.275	ENSG00000065675(PRKCQ)|ENSG00000100351(GRAP2)|ENSG00000102245(CD40LG)|ENSG00000171608(PIK3CD)|ENSG00000172575(RASGRP1)|ENSG00000185386(MAPK11)|ENSG00000114423(CBLB)|ENSG00000172116(CD8B)|ENSG00000124181(PLCG1)|ENSG00000145675(PIK3R1)|ENSG00000134215(VAV3)|ENSG00000213658(LAT)|ENSG00000105221(AKT2)|ENSG00000010810(FYN)|ENSG00000071051(NCK2)|ENSG00000072736(NFATC3)|ENSG00000232810(TNF)|ENSG00000163…	hsa:5588|hsa:9402|hsa:959|hsa:5293|hsa:10125|hsa:5600|hsa:868|hsa:926|hsa:5335|hsa:5295|hsa:10451|hsa:27040|hsa:208|hsa:2534|hsa:8440|hsa:4775|hsa:7124|hsa:29851|hsa:916|hsa:4792|hsa:5602|hsa:3702|hsa:84433|hsa:3937|hsa:1493|hsa:5788|hsa:940|hsa:4790|hsa:927|hsa:925|hsa:7535|hsa:919|hsa:5133	http://www.kegg.jp/kegg-bin/show_pathway?hsa04660+hsa:5588+hsa:9402+hsa:959+hsa:5293+hsa:10125+hsa:5600+hsa:868+hsa:926+hsa:5335+hsa:5295+hsa:10451+hsa:27040+hsa:208+hsa:2534+hsa:8440+hsa:4775+hsa:7124+hsa:29851+hsa:916+hsa:4792+hsa:5602+hsa:3702+hsa:84433+hsa:3937+hsa:1493+hsa:5788+hsa:940+hsa:4790+hsa:927+hsa:925+hsa:7535+hsa:919+hsa:5133
hsa04713	Circadian entrainment	27	1268	93	7681	0.00169003	0.0299958	0.290323	ENSG00000100346(CACNA1I)|ENSG00000182621(PLCB1)|ENSG00000186469(GNG2)|ENSG00000164742(ADCY1)|ENSG00000058404(CAMK2B)|ENSG00000096433(ITPR3)|ENSG00000101333(PLCB4)|ENSG00000127920(GNG11)|ENSG00000152578(GRIA4)|ENSG00000127955(GNAI1)|ENSG00000185532(PRKG1)|ENSG00000154229(PRKCA)|ENSG00000176884(GRIN1)|ENSG00000161509(GRIN2C)|ENSG00000167414(GNG8)|ENSG00000087258(GNAO1)|ENSG00000162728(KCNJ9)|ENSG00…	hsa:8911|hsa:23236|hsa:54331|hsa:107|hsa:816|hsa:3710|hsa:5332|hsa:2791|hsa:2893|hsa:2770|hsa:5592|hsa:5578|hsa:2902|hsa:2905|hsa:94235|hsa:2775|hsa:3765|hsa:6263|hsa:818|hsa:2982|hsa:2983|hsa:10681|hsa:6262|hsa:5567|hsa:5579|hsa:5593|hsa:775	http://www.kegg.jp/kegg-bin/show_pathway?hsa04713+hsa:8911+hsa:23236+hsa:54331+hsa:107+hsa:816+hsa:3710+hsa:5332+hsa:2791+hsa:2893+hsa:2770+hsa:5592+hsa:5578+hsa:2902+hsa:2905+hsa:94235+hsa:2775+hsa:3765+hsa:6263+hsa:818+hsa:2982+hsa:2983+hsa:10681+hsa:6262+hsa:5567+hsa:5579+hsa:5593+hsa:775
hsa04726	Serotonergic synapse	31	1268	111	7681	0.00160264	0.0299958	0.279279	ENSG00000182621(PLCB1)|ENSG00000102468(HTR2A)|ENSG00000186469(GNG2)|ENSG00000096433(ITPR3)|ENSG00000095303(PTGS1)|ENSG00000108576(SLC6A4)|ENSG00000163288(GABRB1)|ENSG00000101333(PLCB4)|ENSG00000127920(GNG11)|ENSG00000165646(SLC18A2)|ENSG00000139287(TPH2)|ENSG00000134716(CYP2J2)|ENSG00000127955(GNAI1)|ENSG00000154229(PRKCA)|ENSG00000167414(GNG8)|ENSG00000087258(GNAO1)|ENSG00000157764(BRAF)|ENSG000…	hsa:23236|hsa:3356|hsa:54331|hsa:3710|hsa:5742|hsa:6532|hsa:2560|hsa:5332|hsa:2791|hsa:6571|hsa:121278|hsa:1573|hsa:2770|hsa:5578|hsa:94235|hsa:2775|hsa:673|hsa:3765|hsa:1559|hsa:3360|hsa:1558|hsa:10681|hsa:773|hsa:5567|hsa:5579|hsa:3355|hsa:775|hsa:3359|hsa:7166|hsa:239|hsa:5743	http://www.kegg.jp/kegg-bin/show_pathway?hsa04726+hsa:23236+hsa:3356+hsa:54331+hsa:3710+hsa:5742+hsa:6532+hsa:2560+hsa:5332+hsa:2791+hsa:6571+hsa:121278+hsa:1573+hsa:2770+hsa:5578+hsa:94235+hsa:2775+hsa:673+hsa:3765+hsa:1559+hsa:3360+hsa:1558+hsa:10681+hsa:773+hsa:5567+hsa:5579+hsa:3355+hsa:775+hsa:3359+hsa:7166+hsa:239+hsa:5743
hsa04974	Protein digestion and absorption	28	1268	97	7681	0.0015406	0.0299958	0.28866	ENSG00000088386(SLC15A1)|ENSG00000142173(COL6A2)|ENSG00000182871(COL18A1)|ENSG00000106688(SLC1A1)|ENSG00000141434(MEP1B)|ENSG00000065618(COL17A1)|ENSG00000082293(COL19A1)|ENSG00000138079(SLC3A1)|ENSG00000123500(COL10A1)|ENSG00000100678(SLC8A3)|ENSG00000171502(COL24A1)|ENSG00000122121(XPNPEP2)|ENSG00000215018(COL28A1)|ENSG00000206384(COL6A6)|ENSG00000163751(CPA3)|ENSG00000018625(ATP1A2)|ENSG000000…	hsa:6564|hsa:1292|hsa:80781|hsa:6505|hsa:4225|hsa:1308|hsa:1310|hsa:6519|hsa:1300|hsa:6547|hsa:255631|hsa:7512|hsa:340267|hsa:131873|hsa:1359|hsa:477|hsa:5646|hsa:1305|hsa:480|hsa:476|hsa:1302|hsa:5222|hsa:1297|hsa:1277|hsa:3769|hsa:1307|hsa:1285|hsa:1286	http://www.kegg.jp/kegg-bin/show_pathway?hsa04974+hsa:6564+hsa:1292+hsa:80781+hsa:6505+hsa:4225+hsa:1308+hsa:1310+hsa:6519+hsa:1300+hsa:6547+hsa:255631+hsa:7512+hsa:340267+hsa:131873+hsa:1359+hsa:477+hsa:5646+hsa:1305+hsa:480+hsa:476+hsa:1302+hsa:5222+hsa:1297+hsa:1277+hsa:3769+hsa:1307+hsa:1285+hsa:1286
hsa05143	African trypanosomiasis	14	1268	36	7681	0.00107877	0.0299958	0.388889	ENSG00000182621(PLCB1)|ENSG00000101333(PLCB4)|ENSG00000154229(PRKCA)|ENSG00000244734(HBB)|ENSG00000113302(IL12B)|ENSG00000125538(IL1B)|ENSG00000188536(HBA2)|ENSG00000206172(HBA1)|ENSG00000232810(TNF)|ENSG00000117560(FASLG)|ENSG00000007908(SELE)|ENSG00000166501(PRKCB)|ENSG00000261701(HPR)|ENSG00000118137(APOA1)	hsa:23236|hsa:5332|hsa:5578|hsa:3043|hsa:3593|hsa:3553|hsa:3040|hsa:3039|hsa:7124|hsa:356|hsa:6401|hsa:5579|hsa:3250|hsa:335	http://www.kegg.jp/kegg-bin/show_pathway?hsa05143+hsa:23236+hsa:5332+hsa:5578+hsa:3043+hsa:3593+hsa:3553+hsa:3040+hsa:3039+hsa:7124+hsa:356+hsa:6401+hsa:5579+hsa:3250+hsa:335
hsa05340	Primary immunodeficiency	14	1268	37	7681	0.00147565	0.0299958	0.378378	ENSG00000128322(IGLL1)|ENSG00000160224(AIRE)|ENSG00000102245(CD40LG)|ENSG00000159958(TNFRSF13C)|ENSG00000105369(CD79A)|ENSG00000172116(CD8B)|ENSG00000163600(ICOS)|ENSG00000198851(CD3E)|ENSG00000105639(JAK3)|ENSG00000240505(TNFRSF13B)|ENSG00000081237(PTPRC)|ENSG00000254126(CD8B2)|ENSG00000153563(CD8A)|ENSG00000115085(ZAP70)	hsa:3543|hsa:326|hsa:959|hsa:115650|hsa:973|hsa:926|hsa:29851|hsa:916|hsa:3718|hsa:23495|hsa:5788|hsa:927|hsa:925|hsa:7535	http://www.kegg.jp/kegg-bin/show_pathway?hsa05340+hsa:3543+hsa:326+hsa:959+hsa:115650+hsa:973+hsa:926+hsa:29851+hsa:916+hsa:3718+hsa:23495+hsa:5788+hsa:927+hsa:925+hsa:7535
hsa04064	NF-kappa B signaling pathway	29	1268	103	7681	0.00195247	0.0314171	0.281553	ENSG00000065675(PRKCQ)|ENSG00000158813(EDA)|ENSG00000171791(BCL2)|ENSG00000102245(CD40LG)|ENSG00000159958(TNFRSF13C)|ENSG00000275302(CCL4)|ENSG00000276070(CCL4L2)|ENSG00000276070(CCL4L2)|ENSG00000107562(CXCL12)|ENSG00000056558(TRAF1)|ENSG00000124181(PLCG1)|ENSG00000118503(TNFAIP3)|ENSG00000213658(LAT)|ENSG00000104856(RELB)|ENSG00000125538(IL1B)|ENSG00000107201(DDX58)|ENSG00000226979(LTA)|ENSG0000…	hsa:5588|hsa:1896|hsa:596|hsa:959|hsa:115650|hsa:6351|hsa:9560|hsa:388372|hsa:6387|hsa:7185|hsa:5335|hsa:7128|hsa:27040|hsa:5971|hsa:3553|hsa:23586|hsa:4049|hsa:7124|hsa:10913|hsa:4050|hsa:4792|hsa:84433|hsa:4616|hsa:8737|hsa:5579|hsa:4790|hsa:472|hsa:7535|hsa:5743	http://www.kegg.jp/kegg-bin/show_pathway?hsa04064+hsa:5588+hsa:1896+hsa:596+hsa:959+hsa:115650+hsa:6351+hsa:9560+hsa:388372+hsa:6387+hsa:7185+hsa:5335+hsa:7128+hsa:27040+hsa:5971+hsa:3553+hsa:23586+hsa:4049+hsa:7124+hsa:10913+hsa:4050+hsa:4792+hsa:84433+hsa:4616+hsa:8737+hsa:5579+hsa:4790+hsa:472+hsa:7535+hsa:5743
hsa05165	Human papillomavirus infection	72	1268	319	7681	0.00253908	0.0374515	0.225705	ENSG00000142173(COL6A2)|ENSG00000106003(LFNG)|ENSG00000180138(CSNK1A1L)|ENSG00000154764(WNT7A)|ENSG00000178184(PARD6G)|ENSG00000157601(MX1)|ENSG00000183486(MX2)|ENSG00000171855(IFNB1)|ENSG00000080839(RBL1)|ENSG00000168477(TNXB)|ENSG00000137801(THBS1)|ENSG00000131899(LLGL1)|ENSG00000171608(PIK3CD)|ENSG00000101412(E2F1)|ENSG00000184384(MAML2)|ENSG00000041982(TNC)|ENSG00000164171(ITGA2)|ENSG00000164…	hsa:1292|hsa:3955|hsa:122011|hsa:7476|hsa:84552|hsa:4599|hsa:4600|hsa:3456|hsa:5933|hsa:7148|hsa:7057|hsa:3996|hsa:5293|hsa:1869|hsa:84441|hsa:3371|hsa:3673|hsa:23462|hsa:7473|hsa:7479|hsa:56288|hsa:898|hsa:1950|hsa:50617|hsa:6932|hsa:51384|hsa:5295|hsa:10379|hsa:5747|hsa:208|hsa:55534|hsa:545|hsa:131873|hsa:8313|hsa:8515|hsa:3912|hsa:7124|hsa:356|hsa:7143|hsa:5159|hsa:890|hsa:7480|hsa:7471|hsa:7…	http://www.kegg.jp/kegg-bin/show_pathway?hsa05165+hsa:1292+hsa:3955+hsa:122011+hsa:7476+hsa:84552+hsa:4599+hsa:4600+hsa:3456+hsa:5933+hsa:7148+hsa:7057+hsa:3996+hsa:5293+hsa:1869+hsa:84441+hsa:3371+hsa:3673+hsa:23462+hsa:7473+hsa:7479+hsa:56288+hsa:898+hsa:1950+hsa:50617+hsa:6932+hsa:51384+hsa:5295+hsa:10379+hsa:5747+hsa:208+hsa:55534+hsa:545+hsa:131873+hsa:8313+hsa:8515+hsa:3912+hsa:7124+hsa:356…
hsa05414	Dilated cardiomyopathy	28	1268	100	7681	0.00253066	0.0374515	0.28	ENSG00000164742(ADCY1)|ENSG00000134769(DTNA)|ENSG00000157445(CACNA2D3)|ENSG00000164171(ITGA2)|ENSG00000127990(SGCE)|ENSG00000043591(ADRB1)|ENSG00000100678(SLC8A3)|ENSG00000198523(PLN)|ENSG00000198467(TPM2)|ENSG00000075461(CACNG4)|ENSG00000143127(ITGA10)|ENSG00000232810(TNF)|ENSG00000165995(CACNB2)|ENSG00000259207(ITGB3)|ENSG00000105329(TGFB1)|ENSG00000198626(RYR2)|ENSG00000142875(PRKACB)|ENSG0000…	hsa:107|hsa:1837|hsa:55799|hsa:3673|hsa:8910|hsa:153|hsa:6547|hsa:5350|hsa:7169|hsa:27092|hsa:8515|hsa:7124|hsa:783|hsa:3690|hsa:7040|hsa:6262|hsa:5567|hsa:6444|hsa:59283|hsa:3693|hsa:775|hsa:6442|hsa:3674|hsa:785|hsa:7273|hsa:183|hsa:3676|hsa:3655	http://www.kegg.jp/kegg-bin/show_pathway?hsa05414+hsa:107+hsa:1837+hsa:55799+hsa:3673+hsa:8910+hsa:153+hsa:6547+hsa:5350+hsa:7169+hsa:27092+hsa:8515+hsa:7124+hsa:783+hsa:3690+hsa:7040+hsa:6262+hsa:5567+hsa:6444+hsa:59283+hsa:3693+hsa:775+hsa:6442+hsa:3674+hsa:785+hsa:7273+hsa:183+hsa:3676+hsa:3655
hsa04740	Olfactory transduction	65	1268	286	7681	0.00338508	0.0469994	0.227273	ENSG00000256574(OR13A1)|ENSG00000176555(OR4S1)|ENSG00000058404(CAMK2B)|ENSG00000141404(GNAL)|ENSG00000186642(PDE2A)|ENSG00000100678(SLC8A3)|ENSG00000185532(PRKG1)|ENSG00000169327(OR5AU1)|ENSG00000168124(OR1F1)|ENSG00000104490(NCALD)|ENSG00000171561(OR2AT4)|ENSG00000279270(OR52R1)|ENSG00000278870(OR51G1)|ENSG00000183251(OR51B4)|ENSG00000167355(OR51B5)|ENSG00000176239(OR51B6)|ENSG00000124657(OR2B6)…	hsa:79290|hsa:256148|hsa:816|hsa:2774|hsa:5138|hsa:6547|hsa:5592|hsa:390445|hsa:4992|hsa:83988|hsa:341152|hsa:119695|hsa:79324|hsa:79339|hsa:282763|hsa:390058|hsa:26212|hsa:26534|hsa:818|hsa:26686|hsa:347168|hsa:390152|hsa:390191|hsa:391191|hsa:390327|hsa:130075|hsa:346528|hsa:5567|hsa:79541|hsa:653166|hsa:125958|hsa:5593|hsa:390075|hsa:219981|hsa:390190|hsa:390064|hsa:390036|hsa:119772|hsa:25689…	http://www.kegg.jp/kegg-bin/show_pathway?hsa04740+hsa:79290+hsa:256148+hsa:816+hsa:2774+hsa:5138+hsa:6547+hsa:5592+hsa:390445+hsa:4992+hsa:83988+hsa:341152+hsa:119695+hsa:79324+hsa:79339+hsa:282763+hsa:390058+hsa:26212+hsa:26534+hsa:818+hsa:26686+hsa:347168+hsa:390152+hsa:390191+hsa:391191+hsa:390327+hsa:130075+hsa:346528+hsa:5567+hsa:79541+hsa:653166+hsa:125958+hsa:5593+hsa:390075+hsa:219981+hsa…
hsa05332	Graft-versus-host disease	14	1268	40	7681	0.00345193	0.0469994	0.35	ENSG00000134539(KLRD1)|ENSG00000198502(HLA-DRB5)|ENSG00000179344(HLA-DQB1)|ENSG00000180644(PRF1)|ENSG00000242019(KIR3DL3)|ENSG00000243772(KIR2DL3)|ENSG00000125498(KIR2DL1)|ENSG00000167633(KIR3DL1)|ENSG00000240403(KIR3DL2)|ENSG00000125538(IL1B)|ENSG00000232810(TNF)|ENSG00000117560(FASLG)|ENSG00000134545(KLRC1)|ENSG00000178562(CD28)	hsa:3824|hsa:3127|hsa:3119|hsa:5551|hsa:115653|hsa:3804|hsa:3802|hsa:3811|hsa:3812|hsa:3553|hsa:7124|hsa:356|hsa:3821|hsa:940	http://www.kegg.jp/kegg-bin/show_pathway?hsa05332+hsa:3824+hsa:3127+hsa:3119+hsa:5551+hsa:115653+hsa:3804+hsa:3802+hsa:3811+hsa:3812+hsa:3553+hsa:7124+hsa:356+hsa:3821+hsa:940
hsa04081	Hormone signaling	46	1268	193	7681	0.00505959	0.0654025	0.238342	ENSG00000120693(SMAD9)|ENSG00000147100(SLC16A2)|ENSG00000182621(PLCB1)|ENSG00000172179(PRL)|ENSG00000186469(GNG2)|ENSG00000122679(RAMP3)|ENSG00000164850(GPER1)|ENSG00000164742(ADCY1)|ENSG00000070019(GUCY2C)|ENSG00000112164(GLP1R)|ENSG00000171608(PIK3CD)|ENSG00000101405(OXT)|ENSG00000113389(NPR3)|ENSG00000150594(ADRA2A)|ENSG00000101333(PLCB4)|ENSG00000127920(GNG11)|ENSG00000138039(LHCGR)|ENSG00000…	hsa:4093|hsa:6567|hsa:23236|hsa:5617|hsa:54331|hsa:10268|hsa:2852|hsa:107|hsa:2984|hsa:2740|hsa:5293|hsa:5020|hsa:4883|hsa:150|hsa:5332|hsa:2791|hsa:3973|hsa:153|hsa:5618|hsa:2770|hsa:1734|hsa:5592|hsa:4988|hsa:5295|hsa:7434|hsa:3480|hsa:94235|hsa:4882|hsa:2775|hsa:4986|hsa:11069|hsa:552|hsa:51738|hsa:2100|hsa:7068|hsa:3690|hsa:10681|hsa:269|hsa:5567|hsa:30061|hsa:5593|hsa:7433|hsa:5021|hsa:3061|…	http://www.kegg.jp/kegg-bin/show_pathway?hsa04081+hsa:4093+hsa:6567+hsa:23236+hsa:5617+hsa:54331+hsa:10268+hsa:2852+hsa:107+hsa:2984+hsa:2740+hsa:5293+hsa:5020+hsa:4883+hsa:150+hsa:5332+hsa:2791+hsa:3973+hsa:153+hsa:5618+hsa:2770+hsa:1734+hsa:5592+hsa:4988+hsa:5295+hsa:7434+hsa:3480+hsa:94235+hsa:4882+hsa:2775+hsa:4986+hsa:11069+hsa:552+hsa:51738+hsa:2100+hsa:7068+hsa:3690+hsa:10681+hsa:269+hsa:5…
hsa04933	AGE-RAGE signaling pathway in diabetic complications	27	1268	100	7681	0.00517308	0.0654025	0.27	ENSG00000182621(PLCB1)|ENSG00000078401(EDN1)|ENSG00000171791(BCL2)|ENSG00000171608(PIK3CD)|ENSG00000185386(MAPK11)|ENSG00000101333(PLCB4)|ENSG00000163513(TGFBR2)|ENSG00000138193(PLCE1)|ENSG00000124181(PLCG1)|ENSG00000154229(PRKCA)|ENSG00000145675(PIK3R1)|ENSG00000117525(F3)|ENSG00000105221(AKT2)|ENSG00000125538(IL1B)|ENSG00000232810(TNF)|ENSG00000109339(MAPK10)|ENSG00000007908(SELE)|ENSG000001669…	hsa:23236|hsa:1906|hsa:596|hsa:5293|hsa:5600|hsa:5332|hsa:7048|hsa:51196|hsa:5335|hsa:5578|hsa:5295|hsa:2152|hsa:208|hsa:3553|hsa:7124|hsa:5602|hsa:6401|hsa:4088|hsa:7040|hsa:177|hsa:5579|hsa:4790|hsa:1277|hsa:2335|hsa:183|hsa:1285|hsa:1286	http://www.kegg.jp/kegg-bin/show_pathway?hsa04933+hsa:23236+hsa:1906+hsa:596+hsa:5293+hsa:5600+hsa:5332+hsa:7048+hsa:51196+hsa:5335+hsa:5578+hsa:5295+hsa:2152+hsa:208+hsa:3553+hsa:7124+hsa:5602+hsa:6401+hsa:4088+hsa:7040+hsa:177+hsa:5579+hsa:4790+hsa:1277+hsa:2335+hsa:183+hsa:1285+hsa:1286
hsa04360	Axon guidance	43	1268	179	7681	0.0056792	0.0693254	0.240223	ENSG00000178184(PARD6G)|ENSG00000196220(SRGAP3)|ENSG00000058404(CAMK2B)|ENSG00000075213(SEMA3A)|ENSG00000171608(PIK3CD)|ENSG00000101335(MYL9)|ENSG00000196935(SRGAP1)|ENSG00000143869(GDF7)|ENSG00000137672(TRPC6)|ENSG00000067141(NEO1)|ENSG00000196358(NTNG2)|ENSG00000099204(ABLIM1)|ENSG00000148498(PARD3)|ENSG00000127955(GNAI1)|ENSG00000107562(CXCL12)|ENSG00000124181(PLCG1)|ENSG00000154229(PRKCA)|ENS…	hsa:84552|hsa:9901|hsa:816|hsa:10371|hsa:5293|hsa:10398|hsa:57522|hsa:151449|hsa:7225|hsa:4756|hsa:84628|hsa:3983|hsa:56288|hsa:2770|hsa:6387|hsa:5335|hsa:5578|hsa:1073|hsa:5295|hsa:5747|hsa:7224|hsa:9860|hsa:2534|hsa:8440|hsa:4775|hsa:8633|hsa:91584|hsa:7222|hsa:85464|hsa:818|hsa:5727|hsa:2050|hsa:57556|hsa:84448|hsa:22885|hsa:2043|hsa:223117|hsa:1946|hsa:1942|hsa:54910|hsa:22854|hsa:54361|hsa:2…	http://www.kegg.jp/kegg-bin/show_pathway?hsa04360+hsa:84552+hsa:9901+hsa:816+hsa:10371+hsa:5293+hsa:10398+hsa:57522+hsa:151449+hsa:7225+hsa:4756+hsa:84628+hsa:3983+hsa:56288+hsa:2770+hsa:6387+hsa:5335+hsa:5578+hsa:1073+hsa:5295+hsa:5747+hsa:7224+hsa:9860+hsa:2534+hsa:8440+hsa:4775+hsa:8633+hsa:91584+hsa:7222+hsa:85464+hsa:818+hsa:5727+hsa:2050+hsa:57556+hsa:84448+hsa:22885+hsa:2043+hsa:223117+hsa…
hsa05200	Pathways in cancer	106	1268	514	7681	0.00653831	0.077152	0.206226	ENSG00000102678(FGF9)|ENSG00000125845(BMP2)|ENSG00000102096(PIM2)|ENSG00000182621(PLCB1)|ENSG00000154764(WNT7A)|ENSG00000101109(STK4)|ENSG00000186469(GNG2)|ENSG00000070018(LRP6)|ENSG00000078401(EDN1)|ENSG00000164742(ADCY1)|ENSG00000171791(BCL2)|ENSG00000058404(CAMK2B)|ENSG00000171608(PIK3CD)|ENSG00000172575(RASGRP1)|ENSG00000101412(E2F1)|ENSG00000101333(PLCB4)|ENSG00000095002(MSH2)|ENSG0000016417…	hsa:2254|hsa:650|hsa:11040|hsa:23236|hsa:7476|hsa:6789|hsa:54331|hsa:4040|hsa:1906|hsa:107|hsa:596|hsa:816|hsa:5293|hsa:10125|hsa:1869|hsa:5332|hsa:4436|hsa:3673|hsa:2791|hsa:23462|hsa:7473|hsa:3728|hsa:3572|hsa:7479|hsa:613|hsa:367|hsa:2770|hsa:6387|hsa:7048|hsa:898|hsa:1950|hsa:2113|hsa:7185|hsa:4254|hsa:6932|hsa:5335|hsa:5578|hsa:4609|hsa:51384|hsa:5295|hsa:10235|hsa:64399|hsa:2949|hsa:2946|hs…	http://www.kegg.jp/kegg-bin/show_pathway?hsa05200+hsa:2254+hsa:650+hsa:11040+hsa:23236+hsa:7476+hsa:6789+hsa:54331+hsa:4040+hsa:1906+hsa:107+hsa:596+hsa:816+hsa:5293+hsa:10125+hsa:1869+hsa:5332+hsa:4436+hsa:3673+hsa:2791+hsa:23462+hsa:7473+hsa:3728+hsa:3572+hsa:7479+hsa:613+hsa:367+hsa:2770+hsa:6387+hsa:7048+hsa:898+hsa:1950+hsa:2113+hsa:7185+hsa:4254+hsa:6932+hsa:5335+hsa:5578+hsa:4609+hsa:51384…
hsa04020	Calcium signaling pathway	54	1268	237	7681	0.00680022	0.0776542	0.227848	ENSG00000102678(FGF9)|ENSG00000102755(FLT1)|ENSG00000100346(CACNA1I)|ENSG00000182621(PLCB1)|ENSG00000102468(HTR2A)|ENSG00000108405(P2RX1)|ENSG00000227877(MRLN)|ENSG00000128271(ADORA2A)|ENSG00000157087(ATP2B2)|ENSG00000164742(ADCY1)|ENSG00000058404(CAMK2B)|ENSG00000096433(ITPR3)|ENSG00000141404(GNAL)|ENSG00000101333(PLCB4)|ENSG00000138039(LHCGR)|ENSG00000170962(PDGFD)|ENSG00000101470(TNNC2)|ENSG00…	hsa:2254|hsa:2321|hsa:8911|hsa:23236|hsa:3356|hsa:5023|hsa:100507027|hsa:135|hsa:491|hsa:107|hsa:816|hsa:3710|hsa:2774|hsa:5332|hsa:3973|hsa:80310|hsa:7125|hsa:153|hsa:814|hsa:6547|hsa:1950|hsa:5350|hsa:51196|hsa:5335|hsa:5578|hsa:2902|hsa:2905|hsa:4775|hsa:3274|hsa:552|hsa:952|hsa:844|hsa:5159|hsa:6263|hsa:3360|hsa:818|hsa:4638|hsa:2263|hsa:2260|hsa:6262|hsa:3791|hsa:773|hsa:777|hsa:5567|hsa:557…	http://www.kegg.jp/kegg-bin/show_pathway?hsa04020+hsa:2254+hsa:2321+hsa:8911+hsa:23236+hsa:3356+hsa:5023+hsa:100507027+hsa:135+hsa:491+hsa:107+hsa:816+hsa:3710+hsa:2774+hsa:5332+hsa:3973+hsa:80310+hsa:7125+hsa:153+hsa:814+hsa:6547+hsa:1950+hsa:5350+hsa:51196+hsa:5335+hsa:5578+hsa:2902+hsa:2905+hsa:4775+hsa:3274+hsa:552+hsa:952+hsa:844+hsa:5159+hsa:6263+hsa:3360+hsa:818+hsa:4638+hsa:2263+hsa:2260+…
hsa05410	Hypertrophic cardiomyopathy	25	1268	95	7681	0.0098296	0.10874	0.263158	ENSG00000078401(EDN1)|ENSG00000134769(DTNA)|ENSG00000157445(CACNA2D3)|ENSG00000164171(ITGA2)|ENSG00000127990(SGCE)|ENSG00000100678(SLC8A3)|ENSG00000198467(TPM2)|ENSG00000075461(CACNG4)|ENSG00000143127(ITGA10)|ENSG00000232810(TNF)|ENSG00000165995(CACNB2)|ENSG00000259207(ITGB3)|ENSG00000105329(TGFB1)|ENSG00000198626(RYR2)|ENSG00000170624(SGCD)|ENSG00000142408(CACNG8)|ENSG00000082781(ITGB5)|ENSG0000…	hsa:1906|hsa:1837|hsa:55799|hsa:3673|hsa:8910|hsa:6547|hsa:7169|hsa:27092|hsa:8515|hsa:7124|hsa:783|hsa:3690|hsa:7040|hsa:6262|hsa:6444|hsa:59283|hsa:3693|hsa:775|hsa:6442|hsa:3674|hsa:785|hsa:7273|hsa:183|hsa:3676|hsa:3655	http://www.kegg.jp/kegg-bin/show_pathway?hsa05410+hsa:1906+hsa:1837+hsa:55799+hsa:3673+hsa:8910+hsa:6547+hsa:7169+hsa:27092+hsa:8515+hsa:7124+hsa:783+hsa:3690+hsa:7040+hsa:6262+hsa:6444+hsa:59283+hsa:3693+hsa:775+hsa:6442+hsa:3674+hsa:785+hsa:7273+hsa:183+hsa:3676+hsa:3655
hsa04725	Cholinergic synapse	28	1268	110	7681	0.010502	0.112658	0.254545	ENSG00000182621(PLCB1)|ENSG00000186469(GNG2)|ENSG00000164742(ADCY1)|ENSG00000184185(KCNJ12)|ENSG00000171791(BCL2)|ENSG00000058404(CAMK2B)|ENSG00000096433(ITPR3)|ENSG00000171608(PIK3CD)|ENSG00000101333(PLCB4)|ENSG00000127920(GNG11)|ENSG00000152495(CAMK4)|ENSG00000127955(GNAI1)|ENSG00000075043(KCNQ2)|ENSG00000154229(PRKCA)|ENSG00000145675(PIK3R1)|ENSG00000105221(AKT2)|ENSG00000010810(FYN)|ENSG00000…	hsa:23236|hsa:54331|hsa:107|hsa:3768|hsa:596|hsa:816|hsa:3710|hsa:5293|hsa:5332|hsa:2791|hsa:814|hsa:2770|hsa:3785|hsa:5578|hsa:5295|hsa:208|hsa:2534|hsa:94235|hsa:2775|hsa:818|hsa:56479|hsa:10681|hsa:773|hsa:5567|hsa:5579|hsa:1131|hsa:1128|hsa:775	http://www.kegg.jp/kegg-bin/show_pathway?hsa04725+hsa:23236+hsa:54331+hsa:107+hsa:3768+hsa:596+hsa:816+hsa:3710+hsa:5293+hsa:5332+hsa:2791+hsa:814+hsa:2770+hsa:3785+hsa:5578+hsa:5295+hsa:208+hsa:2534+hsa:94235+hsa:2775+hsa:818+hsa:56479+hsa:10681+hsa:773+hsa:5567+hsa:5579+hsa:1131+hsa:1128+hsa:775
hsa04970	Salivary secretion	23	1268	87	7681	0.0122296	0.120258	0.264368	ENSG00000182621(PLCB1)|ENSG00000157087(ATP2B2)|ENSG00000164742(ADCY1)|ENSG00000134551(PRH2)|ENSG00000231887(PRH1)|ENSG00000096433(ITPR3)|ENSG00000101333(PLCB4)|ENSG00000090382(LYZ)|ENSG00000043591(ADRB1)|ENSG00000185532(PRKG1)|ENSG00000154229(PRKCA)|ENSG00000004468(CD38)|ENSG00000198838(RYR3)|ENSG00000018625(ATP1A2)|ENSG00000164116(GUCY1A1)|ENSG00000061918(GUCY1B1)|ENSG00000132681(ATP1A4)|ENSG000…	hsa:23236|hsa:491|hsa:107|hsa:5555|hsa:5554|hsa:3710|hsa:5332|hsa:4069|hsa:153|hsa:5592|hsa:5578|hsa:952|hsa:6263|hsa:477|hsa:2982|hsa:2983|hsa:480|hsa:5567|hsa:5579|hsa:476|hsa:490|hsa:1131|hsa:5593	http://www.kegg.jp/kegg-bin/show_pathway?hsa04970+hsa:23236+hsa:491+hsa:107+hsa:5555+hsa:5554+hsa:3710+hsa:5332+hsa:4069+hsa:153+hsa:5592+hsa:5578+hsa:952+hsa:6263+hsa:477+hsa:2982+hsa:2983+hsa:480+hsa:5567+hsa:5579+hsa:476+hsa:490+hsa:1131+hsa:5593
hsa05032	Morphine addiction	23	1268	87	7681	0.0122296	0.120258	0.264368	ENSG00000186469(GNG2)|ENSG00000164742(ADCY1)|ENSG00000152270(PDE3B)|ENSG00000113448(PDE4D)|ENSG00000163288(GABRB1)|ENSG00000127920(GNG11)|ENSG00000198873(GRK5)|ENSG00000186642(PDE2A)|ENSG00000127955(GNAI1)|ENSG00000184588(PDE4B)|ENSG00000154229(PRKCA)|ENSG00000112038(OPRM1)|ENSG00000171408(PDE7B)|ENSG00000167414(GNG8)|ENSG00000087258(GNAO1)|ENSG00000205268(PDE7A)|ENSG00000162728(KCNJ9)|ENSG000000…	hsa:54331|hsa:107|hsa:5140|hsa:5144|hsa:2560|hsa:2791|hsa:2869|hsa:5138|hsa:2770|hsa:5142|hsa:5578|hsa:4988|hsa:27115|hsa:94235|hsa:2775|hsa:5150|hsa:3765|hsa:10681|hsa:5139|hsa:10846|hsa:773|hsa:5567|hsa:5579	http://www.kegg.jp/kegg-bin/show_pathway?hsa05032+hsa:54331+hsa:107+hsa:5140+hsa:5144+hsa:2560+hsa:2791+hsa:2869+hsa:5138+hsa:2770+hsa:5142+hsa:5578+hsa:4988+hsa:27115+hsa:94235+hsa:2775+hsa:5150+hsa:3765+hsa:10681+hsa:5139+hsa:10846+hsa:773+hsa:5567+hsa:5579
hsa05412	Arrhythmogenic right ventricular cardiomyopathy	22	1268	82	7681	0.0118169	0.120258	0.268293	ENSG00000134769(DTNA)|ENSG00000157445(CACNA2D3)|ENSG00000164171(ITGA2)|ENSG00000127990(SGCE)|ENSG00000173801(JUP)|ENSG00000100678(SLC8A3)|ENSG00000081059(TCF7)|ENSG00000075461(CACNG4)|ENSG00000143127(ITGA10)|ENSG00000165995(CACNB2)|ENSG00000259207(ITGB3)|ENSG00000138795(LEF1)|ENSG00000198626(RYR2)|ENSG00000170624(SGCD)|ENSG00000142408(CACNG8)|ENSG00000082781(ITGB5)|ENSG00000151067(CACNA1C)|ENSG00…	hsa:1837|hsa:55799|hsa:3673|hsa:8910|hsa:3728|hsa:6547|hsa:6932|hsa:27092|hsa:8515|hsa:783|hsa:3690|hsa:51176|hsa:6262|hsa:6444|hsa:59283|hsa:3693|hsa:775|hsa:6442|hsa:3674|hsa:785|hsa:3676|hsa:3655	http://www.kegg.jp/kegg-bin/show_pathway?hsa05412+hsa:1837+hsa:55799+hsa:3673+hsa:8910+hsa:3728+hsa:6547+hsa:6932+hsa:27092+hsa:8515+hsa:783+hsa:3690+hsa:51176+hsa:6262+hsa:6444+hsa:59283+hsa:3693+hsa:775+hsa:6442+hsa:3674+hsa:785+hsa:3676+hsa:3655
hsa04510	Focal adhesion	45	1268	198	7681	0.0133044	0.123941	0.227273	ENSG00000102755(FLT1)|ENSG00000142173(COL6A2)|ENSG00000171791(BCL2)|ENSG00000168477(TNXB)|ENSG00000137801(THBS1)|ENSG00000171608(PIK3CD)|ENSG00000107242(PIP5K1B)|ENSG00000101335(MYL9)|ENSG00000041982(TNC)|ENSG00000164171(ITGA2)|ENSG00000170962(PDGFD)|ENSG00000138798(EGF)|ENSG00000035403(VCL)|ENSG00000154229(PRKCA)|ENSG00000145675(PIK3R1)|ENSG00000134215(VAV3)|ENSG00000140443(IGF1R)|ENSG0000016939…	hsa:2321|hsa:1292|hsa:596|hsa:7148|hsa:7057|hsa:5293|hsa:8395|hsa:10398|hsa:3371|hsa:3673|hsa:80310|hsa:1950|hsa:7414|hsa:5578|hsa:5295|hsa:10451|hsa:3480|hsa:5747|hsa:208|hsa:2534|hsa:673|hsa:131873|hsa:8515|hsa:3912|hsa:7143|hsa:5159|hsa:5602|hsa:4638|hsa:7448|hsa:55742|hsa:3690|hsa:3791|hsa:5579|hsa:1297|hsa:896|hsa:25759|hsa:3693|hsa:2317|hsa:1277|hsa:3674|hsa:2335|hsa:3676|hsa:1285|hsa:1286|…	http://www.kegg.jp/kegg-bin/show_pathway?hsa04510+hsa:2321+hsa:1292+hsa:596+hsa:7148+hsa:7057+hsa:5293+hsa:8395+hsa:10398+hsa:3371+hsa:3673+hsa:80310+hsa:1950+hsa:7414+hsa:5578+hsa:5295+hsa:10451+hsa:3480+hsa:5747+hsa:208+hsa:2534+hsa:673+hsa:131873+hsa:8515+hsa:3912+hsa:7143+hsa:5159+hsa:5602+hsa:4638+hsa:7448+hsa:55742+hsa:3690+hsa:3791+hsa:5579+hsa:1297+hsa:896+hsa:25759+hsa:3693+hsa:2317+hsa:…
hsa05142	Chagas disease	26	1268	102	7681	0.0131065	0.123941	0.254902	ENSG00000182621(PLCB1)|ENSG00000171855(IFNB1)|ENSG00000164742(ADCY1)|ENSG00000277632(CCL3)|ENSG00000171608(PIK3CD)|ENSG00000141404(GNAL)|ENSG00000185386(MAPK11)|ENSG00000276085(CCL3L1)|ENSG00000276085(CCL3L1)|ENSG00000101333(PLCB4)|ENSG00000127955(GNAI1)|ENSG00000163513(TGFBR2)|ENSG00000145675(PIK3R1)|ENSG00000113302(IL12B)|ENSG00000105221(AKT2)|ENSG00000125538(IL1B)|ENSG00000087258(GNAO1)|ENSG00…	hsa:23236|hsa:3456|hsa:107|hsa:6348|hsa:5293|hsa:2774|hsa:5600|hsa:6349|hsa:414062|hsa:5332|hsa:2770|hsa:7048|hsa:5295|hsa:3593|hsa:208|hsa:3553|hsa:2775|hsa:7124|hsa:916|hsa:356|hsa:4792|hsa:5602|hsa:7040|hsa:4790|hsa:919|hsa:6352	http://www.kegg.jp/kegg-bin/show_pathway?hsa05142+hsa:23236+hsa:3456+hsa:107+hsa:6348+hsa:5293+hsa:2774+hsa:5600+hsa:6349+hsa:414062+hsa:5332+hsa:2770+hsa:7048+hsa:5295+hsa:3593+hsa:208+hsa:3553+hsa:2775+hsa:7124+hsa:916+hsa:356+hsa:4792+hsa:5602+hsa:7040+hsa:4790+hsa:919+hsa:6352
hsa00910	Nitrogen metabolism	7	1268	17	7681	0.0138573	0.125375	0.411765	ENSG00000131686(CA6)|ENSG00000164879(CA3)|ENSG00000169239(CA5B)|ENSG00000174990(CA5A)|ENSG00000133742(CA1)|ENSG00000118298(CA14)|ENSG00000167434(CA4)	hsa:765|hsa:761|hsa:11238|hsa:763|hsa:759|hsa:23632|hsa:762	http://www.kegg.jp/kegg-bin/show_pathway?hsa00910+hsa:765+hsa:761+hsa:11238+hsa:763+hsa:759+hsa:23632+hsa:762
hsa04550	Signaling pathways regulating pluripotency of stem cells	32	1268	133	7681	0.0152292	0.125375	0.240602	ENSG00000120693(SMAD9)|ENSG00000154764(WNT7A)|ENSG00000008083(JARID2)|ENSG00000171608(PIK3CD)|ENSG00000185386(MAPK11)|ENSG00000108379(WNT3)|ENSG00000134352(IL6ST)|ENSG00000075290(WNT8B)|ENSG00000081059(TCF7)|ENSG00000136997(MYC)|ENSG00000002745(WNT16)|ENSG00000145675(PIK3R1)|ENSG00000212993(POU5F1B)|ENSG00000143995(MEIS1)|ENSG00000140443(IGF1R)|ENSG00000105221(AKT2)|ENSG00000255192(NANOGP8)|ENSG0…	hsa:4093|hsa:7476|hsa:3720|hsa:5293|hsa:5600|hsa:7473|hsa:3572|hsa:7479|hsa:6932|hsa:4609|hsa:51384|hsa:5295|hsa:5462|hsa:4211|hsa:3480|hsa:208|hsa:388112|hsa:5460|hsa:8313|hsa:7994|hsa:3718|hsa:7480|hsa:7471|hsa:4838|hsa:2263|hsa:4088|hsa:2260|hsa:5080|hsa:130399|hsa:10637|hsa:7044|hsa:54361	http://www.kegg.jp/kegg-bin/show_pathway?hsa04550+hsa:4093+hsa:7476+hsa:3720+hsa:5293+hsa:5600+hsa:7473+hsa:3572+hsa:7479+hsa:6932+hsa:4609+hsa:51384+hsa:5295+hsa:5462+hsa:4211+hsa:3480+hsa:208+hsa:388112+hsa:5460+hsa:8313+hsa:7994+hsa:3718+hsa:7480+hsa:7471+hsa:4838+hsa:2263+hsa:4088+hsa:2260+hsa:5080+hsa:130399+hsa:10637+hsa:7044+hsa:54361
hsa04659	Th17 cell differentiation	27	1268	108	7681	0.0150242	0.125375	0.25	ENSG00000065675(PRKCQ)|ENSG00000107485(GATA3)|ENSG00000198502(HLA-DRB5)|ENSG00000179344(HLA-DQB1)|ENSG00000103522(IL21R)|ENSG00000185386(MAPK11)|ENSG00000127318(IL22)|ENSG00000134352(IL6ST)|ENSG00000112116(IL17F)|ENSG00000163513(TGFBR2)|ENSG00000112115(IL17A)|ENSG00000124181(PLCG1)|ENSG00000069667(RORA)|ENSG00000213658(LAT)|ENSG00000125538(IL1B)|ENSG00000072736(NFATC3)|ENSG00000198851(CD3E)|ENSG0…	hsa:5588|hsa:2625|hsa:3127|hsa:3119|hsa:50615|hsa:5600|hsa:50616|hsa:3572|hsa:112744|hsa:7048|hsa:3605|hsa:5335|hsa:6095|hsa:27040|hsa:3553|hsa:4775|hsa:916|hsa:3718|hsa:4792|hsa:5602|hsa:4088|hsa:7040|hsa:3091|hsa:4790|hsa:7535|hsa:919|hsa:6097	http://www.kegg.jp/kegg-bin/show_pathway?hsa04659+hsa:5588+hsa:2625+hsa:3127+hsa:3119+hsa:50615+hsa:5600+hsa:50616+hsa:3572+hsa:112744+hsa:7048+hsa:3605+hsa:5335+hsa:6095+hsa:27040+hsa:3553+hsa:4775+hsa:916+hsa:3718+hsa:4792+hsa:5602+hsa:4088+hsa:7040+hsa:3091+hsa:4790+hsa:7535+hsa:919+hsa:6097
hsa04921	Oxytocin signaling pathway	35	1268	148	7681	0.0150033	0.125375	0.236486	ENSG00000182621(PLCB1)|ENSG00000164742(ADCY1)|ENSG00000184185(KCNJ12)|ENSG00000058404(CAMK2B)|ENSG00000096433(ITPR3)|ENSG00000101335(MYL9)|ENSG00000101405(OXT)|ENSG00000103319(EEF2K)|ENSG00000157445(CACNA2D3)|ENSG00000101333(PLCB4)|ENSG00000152495(CAMK4)|ENSG00000127955(GNAI1)|ENSG00000154229(PRKCA)|ENSG00000075461(CACNG4)|ENSG00000110931(CAMKK2)|ENSG00000159899(NPR2)|ENSG00000087258(GNAO1)|ENSG0…	hsa:23236|hsa:107|hsa:3768|hsa:816|hsa:3710|hsa:10398|hsa:5020|hsa:29904|hsa:55799|hsa:5332|hsa:814|hsa:2770|hsa:5578|hsa:27092|hsa:10645|hsa:4882|hsa:2775|hsa:4775|hsa:3765|hsa:783|hsa:952|hsa:6263|hsa:818|hsa:4208|hsa:4638|hsa:2982|hsa:2983|hsa:6262|hsa:5567|hsa:5579|hsa:59283|hsa:5021|hsa:775|hsa:785|hsa:5743	http://www.kegg.jp/kegg-bin/show_pathway?hsa04921+hsa:23236+hsa:107+hsa:3768+hsa:816+hsa:3710+hsa:10398+hsa:5020+hsa:29904+hsa:55799+hsa:5332+hsa:814+hsa:2770+hsa:5578+hsa:27092+hsa:10645+hsa:4882+hsa:2775+hsa:4775+hsa:3765+hsa:783+hsa:952+hsa:6263+hsa:818+hsa:4208+hsa:4638+hsa:2982+hsa:2983+hsa:6262+hsa:5567+hsa:5579+hsa:59283+hsa:5021+hsa:775+hsa:785+hsa:5743
hsa05226	Gastric cancer	34	1268	143	7681	0.0151005	0.125375	0.237762	ENSG00000102678(FGF9)|ENSG00000180138(CSNK1A1L)|ENSG00000154764(WNT7A)|ENSG00000070018(LRP6)|ENSG00000171791(BCL2)|ENSG00000171608(PIK3CD)|ENSG00000101412(E2F1)|ENSG00000108379(WNT3)|ENSG00000173801(JUP)|ENSG00000075290(WNT8B)|ENSG00000163513(TGFBR2)|ENSG00000105173(CCNE1)|ENSG00000138798(EGF)|ENSG00000081059(TCF7)|ENSG00000136997(MYC)|ENSG00000002745(WNT16)|ENSG00000145675(PIK3R1)|ENSG0000010522…	hsa:2254|hsa:122011|hsa:7476|hsa:4040|hsa:596|hsa:5293|hsa:1869|hsa:7473|hsa:3728|hsa:7479|hsa:7048|hsa:898|hsa:1950|hsa:6932|hsa:4609|hsa:51384|hsa:5295|hsa:208|hsa:673|hsa:8313|hsa:7480|hsa:7471|hsa:5243|hsa:4616|hsa:6199|hsa:2263|hsa:4088|hsa:7040|hsa:999|hsa:51176|hsa:1870|hsa:25759|hsa:83998|hsa:54361	http://www.kegg.jp/kegg-bin/show_pathway?hsa05226+hsa:2254+hsa:122011+hsa:7476+hsa:4040+hsa:596+hsa:5293+hsa:1869+hsa:7473+hsa:3728+hsa:7479+hsa:7048+hsa:898+hsa:1950+hsa:6932+hsa:4609+hsa:51384+hsa:5295+hsa:208+hsa:673+hsa:8313+hsa:7480+hsa:7471+hsa:5243+hsa:4616+hsa:6199+hsa:2263+hsa:4088+hsa:7040+hsa:999+hsa:51176+hsa:1870+hsa:25759+hsa:83998+hsa:54361
hsa04911	Insulin secretion	22	1268	84	7681	0.0156917	0.126247	0.261905	ENSG00000182621(PLCB1)|ENSG00000164742(ADCY1)|ENSG00000112164(GLP1R)|ENSG00000058404(CAMK2B)|ENSG00000096433(ITPR3)|ENSG00000101333(PLCB4)|ENSG00000126266(FFAR1)|ENSG00000154229(PRKCA)|ENSG00000091428(RAPGEF4)|ENSG00000135643(KCNMB4)|ENSG00000018625(ATP1A2)|ENSG00000148660(CAMK2G)|ENSG00000132681(ATP1A4)|ENSG00000213676(ATF6B)|ENSG00000198626(RYR2)|ENSG00000142875(PRKACB)|ENSG00000166501(PRKCB)|E…	hsa:23236|hsa:107|hsa:2740|hsa:816|hsa:3710|hsa:5332|hsa:2864|hsa:5578|hsa:11069|hsa:27345|hsa:477|hsa:818|hsa:480|hsa:1388|hsa:6262|hsa:5567|hsa:5579|hsa:476|hsa:3780|hsa:1131|hsa:6833|hsa:775	http://www.kegg.jp/kegg-bin/show_pathway?hsa04911+hsa:23236+hsa:107+hsa:2740+hsa:816+hsa:3710+hsa:5332+hsa:2864+hsa:5578+hsa:11069+hsa:27345+hsa:477+hsa:818+hsa:480+hsa:1388+hsa:6262+hsa:5567+hsa:5579+hsa:476+hsa:3780+hsa:1131+hsa:6833+hsa:775
hsa04923	Regulation of lipolysis in adipocytes	16	1268	56	7681	0.0162687	0.12798	0.285714	ENSG00000165269(AQP7)|ENSG00000164742(ADCY1)|ENSG00000152270(PDE3B)|ENSG00000171608(PIK3CD)|ENSG00000095303(PTGS1)|ENSG00000043591(ADRB1)|ENSG00000127955(GNAI1)|ENSG00000185532(PRKG1)|ENSG00000145675(PIK3R1)|ENSG00000105221(AKT2)|ENSG00000166819(PLIN1)|ENSG00000133328(PLAAT2)|ENSG00000142875(PRKACB)|ENSG00000138669(PRKG2)|ENSG00000073756(PTGS2)|ENSG00000050628(PTGER3)	hsa:364|hsa:107|hsa:5140|hsa:5293|hsa:5742|hsa:153|hsa:2770|hsa:5592|hsa:5295|hsa:208|hsa:5346|hsa:54979|hsa:5567|hsa:5593|hsa:5743|hsa:5733	http://www.kegg.jp/kegg-bin/show_pathway?hsa04923+hsa:364+hsa:107+hsa:5140+hsa:5293+hsa:5742+hsa:153+hsa:2770+hsa:5592+hsa:5295+hsa:208+hsa:5346+hsa:54979+hsa:5567+hsa:5593+hsa:5743+hsa:5733
hsa04082	Neuroactive ligand signaling	41	1268	181	7681	0.0185123	0.142464	0.226519	ENSG00000182621(PLCB1)|ENSG00000102468(HTR2A)|ENSG00000108405(P2RX1)|ENSG00000106688(SLC1A1)|ENSG00000186469(GNG2)|ENSG00000128271(ADORA2A)|ENSG00000164742(ADCY1)|ENSG00000141404(GNAL)|ENSG00000150594(ADRA2A)|ENSG00000108576(SLC6A4)|ENSG00000163288(GABRB1)|ENSG00000101333(PLCB4)|ENSG00000127920(GNG11)|ENSG00000163873(GRIK3)|ENSG00000165646(SLC18A2)|ENSG00000164082(GRM2)|ENSG00000043591(ADRB1)|ENS…	hsa:23236|hsa:3356|hsa:5023|hsa:6505|hsa:54331|hsa:135|hsa:107|hsa:2774|hsa:150|hsa:6532|hsa:2560|hsa:5332|hsa:2791|hsa:2899|hsa:6571|hsa:2912|hsa:153|hsa:2893|hsa:2770|hsa:5578|hsa:4988|hsa:2902|hsa:2905|hsa:2901|hsa:2743|hsa:94235|hsa:2775|hsa:3274|hsa:4986|hsa:3360|hsa:255061|hsa:10681|hsa:5567|hsa:5579|hsa:2913|hsa:1131|hsa:1128|hsa:3355|hsa:3359|hsa:9934|hsa:64805	http://www.kegg.jp/kegg-bin/show_pathway?hsa04082+hsa:23236+hsa:3356+hsa:5023+hsa:6505+hsa:54331+hsa:135+hsa:107+hsa:2774+hsa:150+hsa:6532+hsa:2560+hsa:5332+hsa:2791+hsa:2899+hsa:6571+hsa:2912+hsa:153+hsa:2893+hsa:2770+hsa:5578+hsa:4988+hsa:2902+hsa:2905+hsa:2901+hsa:2743+hsa:94235+hsa:2775+hsa:3274+hsa:4986+hsa:3360+hsa:255061+hsa:10681+hsa:5567+hsa:5579+hsa:2913+hsa:1131+hsa:1128+hsa:3355+hsa:3…
hsa05225	Hepatocellular carcinoma	37	1268	161	7681	0.0196723	0.14817	0.229814	ENSG00000180138(CSNK1A1L)|ENSG00000154764(WNT7A)|ENSG00000070018(LRP6)|ENSG00000171608(PIK3CD)|ENSG00000173473(SMARCC1)|ENSG00000101412(E2F1)|ENSG00000066117(SMARCD1)|ENSG00000108379(WNT3)|ENSG00000075290(WNT8B)|ENSG00000163513(TGFBR2)|ENSG00000081059(TCF7)|ENSG00000124181(PLCG1)|ENSG00000154229(PRKCA)|ENSG00000136997(MYC)|ENSG00000002745(WNT16)|ENSG00000145675(PIK3R1)|ENSG00000134201(GSTM5)|ENSG…	hsa:122011|hsa:7476|hsa:4040|hsa:5293|hsa:6599|hsa:1869|hsa:6602|hsa:7473|hsa:7479|hsa:7048|hsa:6932|hsa:5335|hsa:5578|hsa:4609|hsa:51384|hsa:5295|hsa:2949|hsa:2946|hsa:3480|hsa:55274|hsa:208|hsa:2944|hsa:673|hsa:8313|hsa:2938|hsa:7480|hsa:7471|hsa:4616|hsa:8110|hsa:6199|hsa:4088|hsa:7040|hsa:51176|hsa:5579|hsa:1870|hsa:25759|hsa:54361	http://www.kegg.jp/kegg-bin/show_pathway?hsa05225+hsa:122011+hsa:7476+hsa:4040+hsa:5293+hsa:6599+hsa:1869+hsa:6602+hsa:7473+hsa:7479+hsa:7048+hsa:6932+hsa:5335+hsa:5578+hsa:4609+hsa:51384+hsa:5295+hsa:2949+hsa:2946+hsa:3480+hsa:55274+hsa:208+hsa:2944+hsa:673+hsa:8313+hsa:2938+hsa:7480+hsa:7471+hsa:4616+hsa:8110+hsa:6199+hsa:4088+hsa:7040+hsa:51176+hsa:5579+hsa:1870+hsa:25759+hsa:54361
hsa04310	Wnt signaling pathway	38	1268	167	7681	0.0212453	0.150416	0.227545	ENSG00000180138(CSNK1A1L)|ENSG00000198768(APCDD1L)|ENSG00000182621(PLCB1)|ENSG00000154764(WNT7A)|ENSG00000070018(LRP6)|ENSG00000154856(APCDD1)|ENSG00000065717(TLE2)|ENSG00000058404(CAMK2B)|ENSG00000120057(SFRP5)|ENSG00000196781(TLE1)|ENSG00000101333(PLCB4)|ENSG00000015133(CCDC88C)|ENSG00000169071(ROR2)|ENSG00000108379(WNT3)|ENSG00000075290(WNT8B)|ENSG00000185483(ROR1)|ENSG00000081059(TCF7)|ENSG00…	hsa:122011|hsa:164284|hsa:23236|hsa:7476|hsa:4040|hsa:147495|hsa:7089|hsa:816|hsa:6425|hsa:7088|hsa:5332|hsa:440193|hsa:4920|hsa:7473|hsa:7479|hsa:4919|hsa:6932|hsa:5578|hsa:4609|hsa:51384|hsa:57680|hsa:8549|hsa:6423|hsa:4775|hsa:8313|hsa:7480|hsa:7471|hsa:5602|hsa:818|hsa:1487|hsa:4088|hsa:51176|hsa:5567|hsa:5579|hsa:54894|hsa:896|hsa:59352|hsa:54361	http://www.kegg.jp/kegg-bin/show_pathway?hsa04310+hsa:122011+hsa:164284+hsa:23236+hsa:7476+hsa:4040+hsa:147495+hsa:7089+hsa:816+hsa:6425+hsa:7088+hsa:5332+hsa:440193+hsa:4920+hsa:7473+hsa:7479+hsa:4919+hsa:6932+hsa:5578+hsa:4609+hsa:51384+hsa:57680+hsa:8549+hsa:6423+hsa:4775+hsa:8313+hsa:7480+hsa:7471+hsa:5602+hsa:818+hsa:1487+hsa:4088+hsa:51176+hsa:5567+hsa:5579+hsa:54894+hsa:896+hsa:59352+hsa:5…
hsa04620	Toll-like receptor signaling pathway	25	1268	101	7681	0.0211884	0.150416	0.247525	ENSG00000171855(IFNB1)|ENSG00000277632(CCL3)|ENSG00000171608(PIK3CD)|ENSG00000185386(MAPK11)|ENSG00000275302(CCL4)|ENSG00000276085(CCL3L1)|ENSG00000276085(CCL3L1)|ENSG00000196664(TLR7)|ENSG00000276070(CCL4L2)|ENSG00000276070(CCL4L2)|ENSG00000145675(PIK3R1)|ENSG00000213928(IRF9)|ENSG00000034152(MAP2K3)|ENSG00000113302(IL12B)|ENSG00000105221(AKT2)|ENSG00000125538(IL1B)|ENSG00000232810(TNF)|ENSG0000…	hsa:3456|hsa:6348|hsa:5293|hsa:5600|hsa:6351|hsa:6349|hsa:414062|hsa:51284|hsa:9560|hsa:388372|hsa:5295|hsa:10379|hsa:5606|hsa:3593|hsa:208|hsa:3553|hsa:7124|hsa:4792|hsa:5602|hsa:8737|hsa:3442|hsa:4790|hsa:6373|hsa:7100|hsa:6352	http://www.kegg.jp/kegg-bin/show_pathway?hsa04620+hsa:3456+hsa:6348+hsa:5293+hsa:5600+hsa:6351+hsa:6349+hsa:414062+hsa:51284+hsa:9560+hsa:388372+hsa:5295+hsa:10379+hsa:5606+hsa:3593+hsa:208+hsa:3553+hsa:7124+hsa:4792+hsa:5602+hsa:8737+hsa:3442+hsa:4790+hsa:6373+hsa:7100+hsa:6352
hsa05215	Prostate cancer	24	1268	96	7681	0.0210365	0.150416	0.25	ENSG00000157554(ERG)|ENSG00000184012(TMPRSS2)|ENSG00000171791(BCL2)|ENSG00000171608(PIK3CD)|ENSG00000101412(E2F1)|ENSG00000170962(PDGFD)|ENSG00000169083(AR)|ENSG00000105173(CCNE1)|ENSG00000138798(EGF)|ENSG00000081059(TCF7)|ENSG00000145675(PIK3R1)|ENSG00000140443(IGF1R)|ENSG00000105221(AKT2)|ENSG00000157764(BRAF)|ENSG00000115590(IL1R2)|ENSG00000113721(PDGFRB)|ENSG00000100906(NFKBIA)|ENSG0000014851…	hsa:2078|hsa:7113|hsa:596|hsa:5293|hsa:1869|hsa:80310|hsa:367|hsa:898|hsa:1950|hsa:6932|hsa:5295|hsa:3480|hsa:208|hsa:673|hsa:7850|hsa:5159|hsa:4792|hsa:6935|hsa:2263|hsa:2260|hsa:51176|hsa:4790|hsa:1870|hsa:3645	http://www.kegg.jp/kegg-bin/show_pathway?hsa05215+hsa:2078+hsa:7113+hsa:596+hsa:5293+hsa:1869+hsa:80310+hsa:367+hsa:898+hsa:1950+hsa:6932+hsa:5295+hsa:3480+hsa:208+hsa:673+hsa:7850+hsa:5159+hsa:4792+hsa:6935+hsa:2263+hsa:2260+hsa:51176+hsa:4790+hsa:1870+hsa:3645
hsa04730	Long-term depression	16	1268	58	7681	0.0226417	0.154138	0.275862	ENSG00000182621(PLCB1)|ENSG00000096433(ITPR3)|ENSG00000101333(PLCB4)|ENSG00000128266(GNAZ)|ENSG00000127955(GNAI1)|ENSG00000185532(PRKG1)|ENSG00000154229(PRKCA)|ENSG00000140443(IGF1R)|ENSG00000087258(GNAO1)|ENSG00000157764(BRAF)|ENSG00000164116(GUCY1A1)|ENSG00000061918(GUCY1B1)|ENSG00000141837(CACNA1A)|ENSG00000166501(PRKCB)|ENSG00000106341(PPP1R17)|ENSG00000138669(PRKG2)	hsa:23236|hsa:3710|hsa:5332|hsa:2781|hsa:2770|hsa:5592|hsa:5578|hsa:3480|hsa:2775|hsa:673|hsa:2982|hsa:2983|hsa:773|hsa:5579|hsa:10842|hsa:5593	http://www.kegg.jp/kegg-bin/show_pathway?hsa04730+hsa:23236+hsa:3710+hsa:5332+hsa:2781+hsa:2770+hsa:5592+hsa:5578+hsa:3480+hsa:2775+hsa:673+hsa:2982+hsa:2983+hsa:773+hsa:5579+hsa:10842+hsa:5593
hsa05206	MicroRNAs in cancer	44	1268	199	7681	0.0225775	0.154138	0.221106	ENSG00000208006(MIR16-1)|ENSG00000171791(BCL2)|ENSG00000168477(TNXB)|ENSG00000100234(TIMP3)|ENSG00000137801(THBS1)|ENSG00000146670(CDCA5)|ENSG00000171608(PIK3CD)|ENSG00000101412(E2F1)|ENSG00000041982(TNC)|ENSG00000108379(WNT3)|ENSG00000105173(CCNE1)|ENSG00000124181(PLCG1)|ENSG00000154229(PRKCA)|ENSG00000136997(MYC)|ENSG00000145675(PIK3R1)|ENSG00000207698(MIR32)|ENSG00000141564(RPTOR)|ENSG00000092…	hsa:406950|hsa:596|hsa:7148|hsa:7078|hsa:7057|hsa:113130|hsa:5293|hsa:1869|hsa:3371|hsa:7473|hsa:898|hsa:5335|hsa:5578|hsa:4609|hsa:5295|hsa:407036|hsa:57521|hsa:7430|hsa:407020|hsa:7143|hsa:5159|hsa:54541|hsa:5243|hsa:6935|hsa:3690|hsa:406890|hsa:5579|hsa:4790|hsa:2146|hsa:8091|hsa:995|hsa:1946|hsa:406893|hsa:1870|hsa:1942|hsa:8626|hsa:27086|hsa:9839|hsa:993|hsa:472|hsa:10018|hsa:5743|hsa:1788|h…	http://www.kegg.jp/kegg-bin/show_pathway?hsa05206+hsa:406950+hsa:596+hsa:7148+hsa:7078+hsa:7057+hsa:113130+hsa:5293+hsa:1869+hsa:3371+hsa:7473+hsa:898+hsa:5335+hsa:5578+hsa:4609+hsa:5295+hsa:407036+hsa:57521+hsa:7430+hsa:407020+hsa:7143+hsa:5159+hsa:54541+hsa:5243+hsa:6935+hsa:3690+hsa:406890+hsa:5579+hsa:4790+hsa:2146+hsa:8091+hsa:995+hsa:1946+hsa:406893+hsa:1870+hsa:1942+hsa:8626+hsa:27086+hsa:…
hsa05222	Small cell lung cancer	23	1268	92	7681	0.0235563	0.157338	0.25	ENSG00000171791(BCL2)|ENSG00000171608(PIK3CD)|ENSG00000101412(E2F1)|ENSG00000164171(ITGA2)|ENSG00000105173(CCNE1)|ENSG00000056558(TRAF1)|ENSG00000136997(MYC)|ENSG00000145675(PIK3R1)|ENSG00000169398(PTK2)|ENSG00000105221(AKT2)|ENSG00000091136(LAMB1)|ENSG00000100906(NFKBIA)|ENSG00000125952(MAX)|ENSG00000099860(GADD45B)|ENSG00000109320(NFKB1)|ENSG00000007968(E2F2)|ENSG00000076604(TRAF4)|ENSG00000005…	hsa:596|hsa:5293|hsa:1869|hsa:3673|hsa:898|hsa:7185|hsa:4609|hsa:5295|hsa:5747|hsa:208|hsa:3912|hsa:4792|hsa:4149|hsa:4616|hsa:4790|hsa:1870|hsa:9618|hsa:3674|hsa:2335|hsa:5743|hsa:1285|hsa:1286|hsa:3655	http://www.kegg.jp/kegg-bin/show_pathway?hsa05222+hsa:596+hsa:5293+hsa:1869+hsa:3673+hsa:898+hsa:7185+hsa:4609+hsa:5295+hsa:5747+hsa:208+hsa:3912+hsa:4792+hsa:4149+hsa:4616+hsa:4790+hsa:1870+hsa:9618+hsa:3674+hsa:2335+hsa:5743+hsa:1285+hsa:1286+hsa:3655
hsa04971	Gastric acid secretion	19	1268	73	7681	0.0251973	0.165182	0.260274	ENSG00000182621(PLCB1)|ENSG00000164742(ADCY1)|ENSG00000058404(CAMK2B)|ENSG00000096433(ITPR3)|ENSG00000101333(PLCB4)|ENSG00000147606(SLC26A7)|ENSG00000127955(GNAI1)|ENSG00000154229(PRKCA)|ENSG00000100433(KCNK10)|ENSG00000113749(HRH2)|ENSG00000092820(EZR)|ENSG00000018625(ATP1A2)|ENSG00000148660(CAMK2G)|ENSG00000065534(MYLK)|ENSG00000132681(ATP1A4)|ENSG00000142875(PRKACB)|ENSG00000166501(PRKCB)|ENSG…	hsa:23236|hsa:107|hsa:816|hsa:3710|hsa:5332|hsa:115111|hsa:2770|hsa:5578|hsa:54207|hsa:3274|hsa:7430|hsa:477|hsa:818|hsa:4638|hsa:480|hsa:5567|hsa:5579|hsa:476|hsa:1131	http://www.kegg.jp/kegg-bin/show_pathway?hsa04971+hsa:23236+hsa:107+hsa:816+hsa:3710+hsa:5332+hsa:115111+hsa:2770+hsa:5578+hsa:54207+hsa:3274+hsa:7430+hsa:477+hsa:818+hsa:4638+hsa:480+hsa:5567+hsa:5579+hsa:476+hsa:1131
hsa05144	Malaria	14	1268	50	7681	0.0281096	0.180924	0.28	ENSG00000213809(KLRK1)|ENSG00000213809(KLRK1)|ENSG00000102245(CD40LG)|ENSG00000137801(THBS1)|ENSG00000250361(GYPB)|ENSG00000244734(HBB)|ENSG00000125538(IL1B)|ENSG00000188536(HBA2)|ENSG00000206172(HBA1)|ENSG00000232810(TNF)|ENSG00000007908(SELE)|ENSG00000105329(TGFB1)|ENSG00000174175(SELP)|ENSG00000203710(CR1)	hsa:22914|hsa:100528032|hsa:959|hsa:7057|hsa:2994|hsa:3043|hsa:3553|hsa:3040|hsa:3039|hsa:7124|hsa:6401|hsa:7040|hsa:6403|hsa:1378	http://www.kegg.jp/kegg-bin/show_pathway?hsa05144+hsa:22914+hsa:100528032+hsa:959+hsa:7057+hsa:2994+hsa:3043+hsa:3553+hsa:3040+hsa:3039+hsa:7124+hsa:6401+hsa:7040+hsa:6403+hsa:1378
hsa05321	Inflammatory bowel disease	17	1268	65	7681	0.0316497	0.200071	0.261538	ENSG00000107485(GATA3)|ENSG00000198502(HLA-DRB5)|ENSG00000179344(HLA-DQB1)|ENSG00000103522(IL21R)|ENSG00000127318(IL22)|ENSG00000112116(IL17F)|ENSG00000112115(IL17A)|ENSG00000069667(RORA)|ENSG00000113302(IL12B)|ENSG00000125538(IL1B)|ENSG00000232810(TNF)|ENSG00000166949(SMAD3)|ENSG00000105329(TGFB1)|ENSG00000138378(STAT4)|ENSG00000109320(NFKB1)|ENSG00000187554(TLR5)|ENSG00000143365(RORC)	hsa:2625|hsa:3127|hsa:3119|hsa:50615|hsa:50616|hsa:112744|hsa:3605|hsa:6095|hsa:3593|hsa:3553|hsa:7124|hsa:4088|hsa:7040|hsa:6775|hsa:4790|hsa:7100|hsa:6097	http://www.kegg.jp/kegg-bin/show_pathway?hsa05321+hsa:2625+hsa:3127+hsa:3119+hsa:50615+hsa:50616+hsa:112744+hsa:3605+hsa:6095+hsa:3593+hsa:3553+hsa:7124+hsa:4088+hsa:7040+hsa:6775+hsa:4790+hsa:7100+hsa:6097
hsa04750	Inflammatory mediator regulation of TRP channels	23	1268	95	7681	0.033476	0.207904	0.242105	ENSG00000065675(PRKCQ)|ENSG00000182621(PLCB1)|ENSG00000102468(HTR2A)|ENSG00000164742(ADCY1)|ENSG00000058404(CAMK2B)|ENSG00000096433(ITPR3)|ENSG00000171608(PIK3CD)|ENSG00000185386(MAPK11)|ENSG00000101333(PLCB4)|ENSG00000134716(CYP2J2)|ENSG00000124181(PLCG1)|ENSG00000154229(PRKCA)|ENSG00000145675(PIK3R1)|ENSG00000034152(MAP2K3)|ENSG00000125538(IL1B)|ENSG00000110881(ASIC1)|ENSG00000109339(MAPK10)|EN…	hsa:5588|hsa:23236|hsa:3356|hsa:107|hsa:816|hsa:3710|hsa:5293|hsa:5600|hsa:5332|hsa:1573|hsa:5335|hsa:5578|hsa:5295|hsa:5606|hsa:3553|hsa:41|hsa:5602|hsa:818|hsa:5583|hsa:5567|hsa:5579|hsa:239|hsa:4914	http://www.kegg.jp/kegg-bin/show_pathway?hsa04750+hsa:5588+hsa:23236+hsa:3356+hsa:107+hsa:816+hsa:3710+hsa:5293+hsa:5600+hsa:5332+hsa:1573+hsa:5335+hsa:5578+hsa:5295+hsa:5606+hsa:3553+hsa:41+hsa:5602+hsa:818+hsa:5583+hsa:5567+hsa:5579+hsa:239+hsa:4914
hsa04350	TGF-beta signaling pathway	25	1268	106	7681	0.0368872	0.225139	0.235849	ENSG00000125845(BMP2)|ENSG00000120693(SMAD9)|ENSG00000080839(RBL1)|ENSG00000137801(THBS1)|ENSG00000118707(TGIF2)|ENSG00000049323(LTBP1)|ENSG00000143869(GDF7)|ENSG00000067141(NEO1)|ENSG00000133740(E2F5)|ENSG00000163513(TGFBR2)|ENSG00000183691(NOG)|ENSG00000136997(MYC)|ENSG00000169375(SIN3A)|ENSG00000232810(TNF)|ENSG00000156574(NODAL)|ENSG00000175634(RPS6KB2)|ENSG00000166949(SMAD3)|ENSG00000105329(…	hsa:650|hsa:4093|hsa:5933|hsa:7057|hsa:60436|hsa:4052|hsa:151449|hsa:4756|hsa:1875|hsa:7048|hsa:9241|hsa:4609|hsa:25942|hsa:7124|hsa:4838|hsa:6199|hsa:4088|hsa:7040|hsa:375387|hsa:269|hsa:7018|hsa:130399|hsa:10637|hsa:7044|hsa:64388	http://www.kegg.jp/kegg-bin/show_pathway?hsa04350+hsa:650+hsa:4093+hsa:5933+hsa:7057+hsa:60436+hsa:4052+hsa:151449+hsa:4756+hsa:1875+hsa:7048+hsa:9241+hsa:4609+hsa:25942+hsa:7124+hsa:4838+hsa:6199+hsa:4088+hsa:7040+hsa:375387+hsa:269+hsa:7018+hsa:130399+hsa:10637+hsa:7044+hsa:64388
hsa04540	Gap junction	21	1268	86	7681	0.0375644	0.225387	0.244186	ENSG00000178462(TUBAL3)|ENSG00000182621(PLCB1)|ENSG00000102468(HTR2A)|ENSG00000164742(ADCY1)|ENSG00000101162(TUBB1)|ENSG00000096433(ITPR3)|ENSG00000101333(PLCB4)|ENSG00000170962(PDGFD)|ENSG00000043591(ADRB1)|ENSG00000127955(GNAI1)|ENSG00000185532(PRKG1)|ENSG00000138798(EGF)|ENSG00000154229(PRKCA)|ENSG00000113721(PDGFRB)|ENSG00000164116(GUCY1A1)|ENSG00000061918(GUCY1B1)|ENSG00000142875(PRKACB)|ENS…	hsa:79861|hsa:23236|hsa:3356|hsa:107|hsa:81027|hsa:3710|hsa:5332|hsa:80310|hsa:153|hsa:2770|hsa:5592|hsa:1950|hsa:5578|hsa:5159|hsa:2982|hsa:2983|hsa:5567|hsa:5579|hsa:5593|hsa:112714|hsa:7277	http://www.kegg.jp/kegg-bin/show_pathway?hsa04540+hsa:79861+hsa:23236+hsa:3356+hsa:107+hsa:81027+hsa:3710+hsa:5332+hsa:80310+hsa:153+hsa:2770+hsa:5592+hsa:1950+hsa:5578+hsa:5159+hsa:2982+hsa:2983+hsa:5567+hsa:5579+hsa:5593+hsa:112714+hsa:7277
hsa04973	Carbohydrate digestion and absorption	12	1268	43	7681	0.0413247	0.243816	0.27907	ENSG00000182621(PLCB1)|ENSG00000171608(PIK3CD)|ENSG00000101333(PLCB4)|ENSG00000257743(MGAM2)|ENSG00000145675(PIK3R1)|ENSG00000105221(AKT2)|ENSG00000257335(MGAM)|ENSG00000156510(HKDC1)|ENSG00000018625(ATP1A2)|ENSG00000132681(ATP1A4)|ENSG00000166501(PRKCB)|ENSG00000163399(ATP1A1)	hsa:23236|hsa:5293|hsa:5332|hsa:93432|hsa:5295|hsa:208|hsa:8972|hsa:80201|hsa:477|hsa:480|hsa:5579|hsa:476	http://www.kegg.jp/kegg-bin/show_pathway?hsa04973+hsa:23236+hsa:5293+hsa:5332+hsa:93432+hsa:5295+hsa:208+hsa:8972+hsa:80201+hsa:477+hsa:480+hsa:5579+hsa:476
hsa04151	PI3K-Akt signaling pathway	68	1268	338	7681	0.0422505	0.245191	0.201183	ENSG00000102678(FGF9)|ENSG00000102755(FLT1)|ENSG00000142173(COL6A2)|ENSG00000081913(PHLPP1)|ENSG00000172179(PRL)|ENSG00000186469(GNG2)|ENSG00000171855(IFNB1)|ENSG00000171791(BCL2)|ENSG00000168477(TNXB)|ENSG00000137801(THBS1)|ENSG00000171608(PIK3CD)|ENSG00000041982(TNC)|ENSG00000164171(ITGA2)|ENSG00000127920(GNG11)|ENSG00000170962(PDGFD)|ENSG00000100721(TCL1A)|ENSG00000113494(PRLR)|ENSG00000105173…	hsa:2254|hsa:2321|hsa:1292|hsa:23239|hsa:5617|hsa:54331|hsa:3456|hsa:596|hsa:7148|hsa:7057|hsa:5293|hsa:3371|hsa:3673|hsa:2791|hsa:80310|hsa:8115|hsa:5618|hsa:898|hsa:1950|hsa:4254|hsa:5578|hsa:4609|hsa:5295|hsa:3480|hsa:5747|hsa:208|hsa:94235|hsa:131873|hsa:57521|hsa:8515|hsa:3912|hsa:356|hsa:7143|hsa:3718|hsa:5159|hsa:54541|hsa:2323|hsa:7448|hsa:57121|hsa:284|hsa:3690|hsa:3442|hsa:6199|hsa:2263…	http://www.kegg.jp/kegg-bin/show_pathway?hsa04151+hsa:2254+hsa:2321+hsa:1292+hsa:23239+hsa:5617+hsa:54331+hsa:3456+hsa:596+hsa:7148+hsa:7057+hsa:5293+hsa:3371+hsa:3673+hsa:2791+hsa:80310+hsa:8115+hsa:5618+hsa:898+hsa:1950+hsa:4254+hsa:5578+hsa:4609+hsa:5295+hsa:3480+hsa:5747+hsa:208+hsa:94235+hsa:131873+hsa:57521+hsa:8515+hsa:3912+hsa:356+hsa:7143+hsa:3718+hsa:5159+hsa:54541+hsa:2323+hsa:7448+hsa…
hsa04010	MAPK signaling pathway	59	1268	289	7681	0.0433806	0.247689	0.204152	ENSG00000102678(FGF9)|ENSG00000102755(FLT1)|ENSG00000100346(CACNA1I)|ENSG00000101109(STK4)|ENSG00000072133(RPS6KA6)|ENSG00000133818(RRAS2)|ENSG00000172575(RASGRP1)|ENSG00000185386(MAPK11)|ENSG00000157445(CACNA2D3)|ENSG00000153233(PTPRR)|ENSG00000113319(RASGRF2)|ENSG00000170962(PDGFD)|ENSG00000139318(DUSP6)|ENSG00000163513(TGFBR2)|ENSG00000138798(EGF)|ENSG00000155903(RASA2)|ENSG00000049130(KITLG)|…	hsa:2254|hsa:2321|hsa:8911|hsa:6789|hsa:27330|hsa:22800|hsa:10125|hsa:5600|hsa:55799|hsa:5801|hsa:5924|hsa:80310|hsa:1848|hsa:7048|hsa:1950|hsa:5922|hsa:4254|hsa:5578|hsa:27092|hsa:4609|hsa:10235|hsa:5606|hsa:5971|hsa:3480|hsa:9693|hsa:208|hsa:3553|hsa:1844|hsa:2122|hsa:4775|hsa:673|hsa:7124|hsa:783|hsa:356|hsa:5159|hsa:5602|hsa:4208|hsa:2323|hsa:4149|hsa:4616|hsa:284|hsa:2263|hsa:2260|hsa:7040|h…	http://www.kegg.jp/kegg-bin/show_pathway?hsa04010+hsa:2254+hsa:2321+hsa:8911+hsa:6789+hsa:27330+hsa:22800+hsa:10125+hsa:5600+hsa:55799+hsa:5801+hsa:5924+hsa:80310+hsa:1848+hsa:7048+hsa:1950+hsa:5922+hsa:4254+hsa:5578+hsa:27092+hsa:4609+hsa:10235+hsa:5606+hsa:5971+hsa:3480+hsa:9693+hsa:208+hsa:3553+hsa:1844+hsa:2122+hsa:4775+hsa:673+hsa:7124+hsa:783+hsa:356+hsa:5159+hsa:5602+hsa:4208+hsa:2323+hsa:…
hsa04270	Vascular smooth muscle contraction	29	1268	129	7681	0.0464379	0.260937	0.224806	ENSG00000065675(PRKCQ)|ENSG00000182621(PLCB1)|ENSG00000128271(ADORA2A)|ENSG00000122679(RAMP3)|ENSG00000078401(EDN1)|ENSG00000164742(ADCY1)|ENSG00000096433(ITPR3)|ENSG00000101335(MYL9)|ENSG00000101333(PLCB4)|ENSG00000185532(PRKG1)|ENSG00000154229(PRKCA)|ENSG00000160013(PTGIR)|ENSG00000159899(NPR2)|ENSG00000122786(CALD1)|ENSG00000157764(BRAF)|ENSG00000135643(KCNMB4)|ENSG00000166148(AVPR1A)|ENSG0000…	hsa:5588|hsa:23236|hsa:135|hsa:10268|hsa:1906|hsa:107|hsa:3710|hsa:10398|hsa:5332|hsa:5592|hsa:5578|hsa:5739|hsa:4882|hsa:800|hsa:673|hsa:27345|hsa:552|hsa:4638|hsa:5583|hsa:2982|hsa:2983|hsa:4629|hsa:4628|hsa:5567|hsa:5579|hsa:94274|hsa:775|hsa:10335|hsa:183	http://www.kegg.jp/kegg-bin/show_pathway?hsa04270+hsa:5588+hsa:23236+hsa:135+hsa:10268+hsa:1906+hsa:107+hsa:3710+hsa:10398+hsa:5332+hsa:5592+hsa:5578+hsa:5739+hsa:4882+hsa:800+hsa:673+hsa:27345+hsa:552+hsa:4638+hsa:5583+hsa:2982+hsa:2983+hsa:4629+hsa:4628+hsa:5567+hsa:5579+hsa:94274+hsa:775+hsa:10335+hsa:183
hsa05310	Asthma	9	1268	30	7681	0.0476372	0.263493	0.3	ENSG00000102245(CD40LG)|ENSG00000198502(HLA-DRB5)|ENSG00000179344(HLA-DQB1)|ENSG00000149534(MS4A2)|ENSG00000232810(TNF)|ENSG00000186652(PRG2)|ENSG00000169397(RNASE3)|ENSG00000121053(EPX)|ENSG00000179639(FCER1A)	hsa:959|hsa:3127|hsa:3119|hsa:2206|hsa:7124|hsa:5553|hsa:6037|hsa:8288|hsa:2205	http://www.kegg.jp/kegg-bin/show_pathway?hsa05310+hsa:959+hsa:3127+hsa:3119+hsa:2206+hsa:7124+hsa:5553+hsa:6037+hsa:8288+hsa:2205
hsa04919	Thyroid hormone signaling pathway	27	1268	120	7681	0.0527428	0.282893	0.225	ENSG00000180182(MED14)|ENSG00000147100(SLC16A2)|ENSG00000182621(PLCB1)|ENSG00000114166(KAT2B)|ENSG00000171608(PIK3CD)|ENSG00000101333(PLCB4)|ENSG00000042429(MED17)|ENSG00000211448(DIO2)|ENSG00000198523(PLN)|ENSG00000138193(PLCE1)|ENSG00000124181(PLCG1)|ENSG00000154229(PRKCA)|ENSG00000136997(MYC)|ENSG00000145675(PIK3R1)|ENSG00000105221(AKT2)|ENSG00000169375(SIN3A)|ENSG00000144893(MED12L)|ENSG00000…	hsa:9282|hsa:6567|hsa:23236|hsa:8850|hsa:5293|hsa:5332|hsa:9440|hsa:1734|hsa:5350|hsa:51196|hsa:5335|hsa:5578|hsa:4609|hsa:5295|hsa:208|hsa:25942|hsa:116931|hsa:7068|hsa:477|hsa:3690|hsa:480|hsa:23389|hsa:3091|hsa:5567|hsa:5579|hsa:476|hsa:54361	http://www.kegg.jp/kegg-bin/show_pathway?hsa04919+hsa:9282+hsa:6567+hsa:23236+hsa:8850+hsa:5293+hsa:5332+hsa:9440+hsa:1734+hsa:5350+hsa:51196+hsa:5335+hsa:5578+hsa:4609+hsa:5295+hsa:208+hsa:25942+hsa:116931+hsa:7068+hsa:477+hsa:3690+hsa:480+hsa:23389+hsa:3091+hsa:5567+hsa:5579+hsa:476+hsa:54361
hsa05235	PD-L1 expression and PD-1 checkpoint pathway in cancer	21	1268	89	7681	0.0523503	0.282893	0.235955	ENSG00000065675(PRKCQ)|ENSG00000171608(PIK3CD)|ENSG00000172575(RASGRP1)|ENSG00000185386(MAPK11)|ENSG00000138798(EGF)|ENSG00000124181(PLCG1)|ENSG00000145675(PIK3R1)|ENSG00000034152(MAP2K3)|ENSG00000213658(LAT)|ENSG00000105221(AKT2)|ENSG00000156127(BATF)|ENSG00000072736(NFATC3)|ENSG00000198851(CD3E)|ENSG00000100906(NFKBIA)|ENSG00000175634(RPS6KB2)|ENSG00000100644(HIF1A)|ENSG00000178562(CD28)|ENSG00…	hsa:5588|hsa:5293|hsa:10125|hsa:5600|hsa:1950|hsa:5335|hsa:5295|hsa:5606|hsa:27040|hsa:208|hsa:10538|hsa:4775|hsa:916|hsa:4792|hsa:6199|hsa:3091|hsa:940|hsa:4790|hsa:7535|hsa:919|hsa:5133	http://www.kegg.jp/kegg-bin/show_pathway?hsa05235+hsa:5588+hsa:5293+hsa:10125+hsa:5600+hsa:1950+hsa:5335+hsa:5295+hsa:5606+hsa:27040+hsa:208+hsa:10538+hsa:4775+hsa:916+hsa:4792+hsa:6199+hsa:3091+hsa:940+hsa:4790+hsa:7535+hsa:919+hsa:5133
hsa04014	Ras signaling pathway	46	1268	224	7681	0.062696	0.311062	0.205357	ENSG00000102678(FGF9)|ENSG00000102755(FLT1)|ENSG00000185989(RASA3)|ENSG00000101109(STK4)|ENSG00000186469(GNG2)|ENSG00000133818(RRAS2)|ENSG00000171608(PIK3CD)|ENSG00000172575(RASGRP1)|ENSG00000127920(GNG11)|ENSG00000113319(RASGRF2)|ENSG00000170962(PDGFD)|ENSG00000144837(PLA1A)|ENSG00000138798(EGF)|ENSG00000134954(ETS1)|ENSG00000138193(PLCE1)|ENSG00000155903(RASA2)|ENSG00000049130(KITLG)|ENSG000001…	hsa:2254|hsa:2321|hsa:22821|hsa:6789|hsa:54331|hsa:22800|hsa:5293|hsa:10125|hsa:2791|hsa:5924|hsa:80310|hsa:51365|hsa:1950|hsa:2113|hsa:51196|hsa:5922|hsa:4254|hsa:5335|hsa:5578|hsa:2902|hsa:5295|hsa:10235|hsa:27040|hsa:3480|hsa:208|hsa:94235|hsa:356|hsa:5159|hsa:5602|hsa:2323|hsa:54979|hsa:284|hsa:2263|hsa:10681|hsa:2260|hsa:3791|hsa:5567|hsa:5579|hsa:4790|hsa:1946|hsa:1942|hsa:5966|hsa:8831|hsa…	http://www.kegg.jp/kegg-bin/show_pathway?hsa04014+hsa:2254+hsa:2321+hsa:22821+hsa:6789+hsa:54331+hsa:22800+hsa:5293+hsa:10125+hsa:2791+hsa:5924+hsa:80310+hsa:51365+hsa:1950+hsa:2113+hsa:51196+hsa:5922+hsa:4254+hsa:5335+hsa:5578+hsa:2902+hsa:5295+hsa:10235+hsa:27040+hsa:3480+hsa:208+hsa:94235+hsa:356+hsa:5159+hsa:5602+hsa:2323+hsa:54979+hsa:284+hsa:2263+hsa:10681+hsa:2260+hsa:3791+hsa:5567+hsa:557…
hsa04080	Neuroactive ligand-receptor interaction	62	1268	312	7681	0.0623092	0.311062	0.198718	ENSG00000134489(HRH4)|ENSG00000182162(P2RY8)|ENSG00000102468(HTR2A)|ENSG00000108405(P2RX1)|ENSG00000168229(PTGDR)|ENSG00000172179(PRL)|ENSG00000128271(ADORA2A)|ENSG00000078401(EDN1)|ENSG00000112164(GLP1R)|ENSG00000101405(OXT)|ENSG00000188822(CNR2)|ENSG00000150594(ADRA2A)|ENSG00000163288(GABRB1)|ENSG00000163873(GRIK3)|ENSG00000138039(LHCGR)|ENSG00000164082(GRM2)|ENSG00000043591(ADRB1)|ENSG00000113…	hsa:59340|hsa:286530|hsa:3356|hsa:5023|hsa:5729|hsa:5617|hsa:135|hsa:1906|hsa:2740|hsa:5020|hsa:1269|hsa:150|hsa:2560|hsa:2899|hsa:3973|hsa:2912|hsa:153|hsa:5618|hsa:2893|hsa:1135|hsa:4988|hsa:2902|hsa:2905|hsa:1901|hsa:1241|hsa:7434|hsa:10874|hsa:2151|hsa:2901|hsa:2743|hsa:5739|hsa:1511|hsa:3274|hsa:257313|hsa:4986|hsa:552|hsa:51738|hsa:3640|hsa:7068|hsa:3360|hsa:4142|hsa:5646|hsa:6343|hsa:25506…	http://www.kegg.jp/kegg-bin/show_pathway?hsa04080+hsa:59340+hsa:286530+hsa:3356+hsa:5023+hsa:5729+hsa:5617+hsa:135+hsa:1906+hsa:2740+hsa:5020+hsa:1269+hsa:150+hsa:2560+hsa:2899+hsa:3973+hsa:2912+hsa:153+hsa:5618+hsa:2893+hsa:1135+hsa:4988+hsa:2902+hsa:2905+hsa:1901+hsa:1241+hsa:7434+hsa:10874+hsa:2151+hsa:2901+hsa:2743+hsa:5739+hsa:1511+hsa:3274+hsa:257313+hsa:4986+hsa:552+hsa:51738+hsa:3640+hsa:…
hsa04622	RIG-I-like receptor signaling pathway	16	1268	65	7681	0.0599758	0.311062	0.246154	ENSG00000101695(RNF125)|ENSG00000171855(IFNB1)|ENSG00000185386(MAPK11)|ENSG00000108771(DHX58)|ENSG00000124201(ZNFX1)|ENSG00000068308(OTUD5)|ENSG00000113302(IL12B)|ENSG00000107201(DDX58)|ENSG00000232810(TNF)|ENSG00000100906(NFKBIA)|ENSG00000109339(MAPK10)|ENSG00000184995(IFNE)|ENSG00000137275(RIPK1)|ENSG00000147873(IFNA5)|ENSG00000109320(NFKB1)|ENSG00000187608(ISG15)	hsa:54941|hsa:3456|hsa:5600|hsa:79132|hsa:57169|hsa:55593|hsa:3593|hsa:23586|hsa:7124|hsa:4792|hsa:5602|hsa:338376|hsa:8737|hsa:3442|hsa:4790|hsa:9636	http://www.kegg.jp/kegg-bin/show_pathway?hsa04622+hsa:54941+hsa:3456+hsa:5600+hsa:79132+hsa:57169+hsa:55593+hsa:3593+hsa:23586+hsa:7124+hsa:4792+hsa:5602+hsa:338376+hsa:8737+hsa:3442+hsa:4790+hsa:9636
hsa04814	Motor proteins	39	1268	186	7681	0.062742	0.311062	0.209677	ENSG00000178462(TUBAL3)|ENSG00000095777(MYO3A)|ENSG00000105877(DNAH11)|ENSG00000133454(MYO18B)|ENSG00000101162(TUBB1)|ENSG00000124721(DNAH8)|ENSG00000163808(KIF15)|ENSG00000159433(STARD9)|ENSG00000101335(MYL9)|ENSG00000164627(KIF6)|ENSG00000101470(TNNC2)|ENSG00000144821(MYH15)|ENSG00000198336(MYL4)|ENSG00000121621(KIF18A)|ENSG00000198467(TPM2)|ENSG00000196586(MYO6)|ENSG00000196169(KIF19)|ENSG0000…	hsa:79861|hsa:53904|hsa:8701|hsa:84700|hsa:81027|hsa:1769|hsa:56992|hsa:57519|hsa:10398|hsa:221458|hsa:7125|hsa:22989|hsa:4635|hsa:81930|hsa:7169|hsa:4646|hsa:124602|hsa:1768|hsa:7140|hsa:92558|hsa:3832|hsa:8632|hsa:9585|hsa:56171|hsa:55083|hsa:4629|hsa:4628|hsa:283446|hsa:1770|hsa:146909|hsa:9928|hsa:112714|hsa:25981|hsa:11004|hsa:140469|hsa:79659|hsa:23046|hsa:7277|hsa:3797	http://www.kegg.jp/kegg-bin/show_pathway?hsa04814+hsa:79861+hsa:53904+hsa:8701+hsa:84700+hsa:81027+hsa:1769+hsa:56992+hsa:57519+hsa:10398+hsa:221458+hsa:7125+hsa:22989+hsa:4635+hsa:81930+hsa:7169+hsa:4646+hsa:124602+hsa:1768+hsa:7140+hsa:92558+hsa:3832+hsa:8632+hsa:9585+hsa:56171+hsa:55083+hsa:4629+hsa:4628+hsa:283446+hsa:1770+hsa:146909+hsa:9928+hsa:112714+hsa:25981+hsa:11004+hsa:140469+hsa:7965…
hsa04925	Aldosterone synthesis and secretion	22	1268	96	7681	0.0632668	0.311062	0.229167	ENSG00000100346(CACNA1I)|ENSG00000182621(PLCB1)|ENSG00000157087(ATP2B2)|ENSG00000164742(ADCY1)|ENSG00000058404(CAMK2B)|ENSG00000096433(ITPR3)|ENSG00000101333(PLCB4)|ENSG00000140459(CYP11A1)|ENSG00000152495(CAMK4)|ENSG00000186642(PDE2A)|ENSG00000154229(PRKCA)|ENSG00000018625(ATP1A2)|ENSG00000148660(CAMK2G)|ENSG00000132681(ATP1A4)|ENSG00000213676(ATF6B)|ENSG00000142875(PRKACB)|ENSG00000166501(PRKCB…	hsa:8911|hsa:23236|hsa:491|hsa:107|hsa:816|hsa:3710|hsa:5332|hsa:1583|hsa:814|hsa:5138|hsa:5578|hsa:477|hsa:818|hsa:480|hsa:1388|hsa:5567|hsa:5579|hsa:23683|hsa:476|hsa:490|hsa:775|hsa:183	http://www.kegg.jp/kegg-bin/show_pathway?hsa04925+hsa:8911+hsa:23236+hsa:491+hsa:107+hsa:816+hsa:3710+hsa:5332+hsa:1583+hsa:814+hsa:5138+hsa:5578+hsa:477+hsa:818+hsa:480+hsa:1388+hsa:5567+hsa:5579+hsa:23683+hsa:476+hsa:490+hsa:775+hsa:183
hsa04926	Relaxin signaling pathway	28	1268	127	7681	0.0614727	0.311062	0.220472	ENSG00000182621(PLCB1)|ENSG00000186469(GNG2)|ENSG00000078401(EDN1)|ENSG00000164742(ADCY1)|ENSG00000171608(PIK3CD)|ENSG00000185386(MAPK11)|ENSG00000101333(PLCB4)|ENSG00000127920(GNG11)|ENSG00000127955(GNAI1)|ENSG00000163513(TGFBR2)|ENSG00000154229(PRKCA)|ENSG00000145675(PIK3R1)|ENSG00000105221(AKT2)|ENSG00000167414(GNG8)|ENSG00000087258(GNAO1)|ENSG00000248099(INSL3)|ENSG00000100906(NFKBIA)|ENSG000…	hsa:23236|hsa:54331|hsa:1906|hsa:107|hsa:5293|hsa:5600|hsa:5332|hsa:2791|hsa:2770|hsa:7048|hsa:5578|hsa:5295|hsa:208|hsa:94235|hsa:2775|hsa:3640|hsa:4792|hsa:5602|hsa:10681|hsa:7040|hsa:1388|hsa:5567|hsa:4790|hsa:25759|hsa:339403|hsa:1277|hsa:1285|hsa:1286	http://www.kegg.jp/kegg-bin/show_pathway?hsa04926+hsa:23236+hsa:54331+hsa:1906+hsa:107+hsa:5293+hsa:5600+hsa:5332+hsa:2791+hsa:2770+hsa:7048+hsa:5578+hsa:5295+hsa:208+hsa:94235+hsa:2775+hsa:3640+hsa:4792+hsa:5602+hsa:10681+hsa:7040+hsa:1388+hsa:5567+hsa:4790+hsa:25759+hsa:339403+hsa:1277+hsa:1285+hsa:1286
hsa04724	Glutamatergic synapse	25	1268	112	7681	0.065608	0.313855	0.223214	ENSG00000182621(PLCB1)|ENSG00000106688(SLC1A1)|ENSG00000186469(GNG2)|ENSG00000164742(ADCY1)|ENSG00000096433(ITPR3)|ENSG00000111371(SLC38A1)|ENSG00000101333(PLCB4)|ENSG00000127920(GNG11)|ENSG00000163873(GRIK3)|ENSG00000164082(GRM2)|ENSG00000152578(GRIA4)|ENSG00000127955(GNAI1)|ENSG00000154229(PRKCA)|ENSG00000088899(LZTS3)|ENSG00000176884(GRIN1)|ENSG00000161509(GRIN2C)|ENSG00000105737(GRIK5)|ENSG00…	hsa:23236|hsa:6505|hsa:54331|hsa:107|hsa:3710|hsa:81539|hsa:5332|hsa:2791|hsa:2899|hsa:2912|hsa:2893|hsa:2770|hsa:5578|hsa:9762|hsa:2902|hsa:2905|hsa:2901|hsa:94235|hsa:2775|hsa:10681|hsa:773|hsa:5567|hsa:5579|hsa:2913|hsa:775	http://www.kegg.jp/kegg-bin/show_pathway?hsa04724+hsa:23236+hsa:6505+hsa:54331+hsa:107+hsa:3710+hsa:81539+hsa:5332+hsa:2791+hsa:2899+hsa:2912+hsa:2893+hsa:2770+hsa:5578+hsa:9762+hsa:2902+hsa:2905+hsa:2901+hsa:94235+hsa:2775+hsa:10681+hsa:773+hsa:5567+hsa:5579+hsa:2913+hsa:775
hsa05210	Colorectal cancer	20	1268	86	7681	0.0651741	0.313855	0.232558	ENSG00000171791(BCL2)|ENSG00000171608(PIK3CD)|ENSG00000095002(MSH2)|ENSG00000163513(TGFBR2)|ENSG00000138798(EGF)|ENSG00000081059(TCF7)|ENSG00000136997(MYC)|ENSG00000145675(PIK3R1)|ENSG00000105221(AKT2)|ENSG00000157764(BRAF)|ENSG00000168646(AXIN2)|ENSG00000109339(MAPK10)|ENSG00000099860(GADD45B)|ENSG00000175634(RPS6KB2)|ENSG00000166949(SMAD3)|ENSG00000105329(TGFB1)|ENSG00000138795(LEF1)|ENSG000001…	hsa:596|hsa:5293|hsa:4436|hsa:7048|hsa:1950|hsa:6932|hsa:4609|hsa:5295|hsa:208|hsa:673|hsa:8313|hsa:5602|hsa:4616|hsa:6199|hsa:4088|hsa:7040|hsa:51176|hsa:2956|hsa:332|hsa:10018	http://www.kegg.jp/kegg-bin/show_pathway?hsa05210+hsa:596+hsa:5293+hsa:4436+hsa:7048+hsa:1950+hsa:6932+hsa:4609+hsa:5295+hsa:208+hsa:673+hsa:8313+hsa:5602+hsa:4616+hsa:6199+hsa:4088+hsa:7040+hsa:51176+hsa:2956+hsa:332+hsa:10018
hsa04022	cGMP-PKG signaling pathway	34	1268	160	7681	0.0669482	0.315054	0.2125	ENSG00000182621(PLCB1)|ENSG00000157087(ATP2B2)|ENSG00000164742(ADCY1)|ENSG00000096433(ITPR3)|ENSG00000152270(PDE3B)|ENSG00000101335(MYL9)|ENSG00000150594(ADRA2A)|ENSG00000101333(PLCB4)|ENSG00000137672(TRPC6)|ENSG00000043591(ADRB1)|ENSG00000186642(PDE2A)|ENSG00000127955(GNAI1)|ENSG00000100678(SLC8A3)|ENSG00000185532(PRKG1)|ENSG00000198523(PLN)|ENSG00000138735(PDE5A)|ENSG00000105221(AKT2)|ENSG00000…	hsa:23236|hsa:491|hsa:107|hsa:3710|hsa:5140|hsa:10398|hsa:150|hsa:5332|hsa:7225|hsa:153|hsa:5138|hsa:2770|hsa:6547|hsa:5592|hsa:5350|hsa:8654|hsa:208|hsa:4882|hsa:4775|hsa:27345|hsa:477|hsa:4208|hsa:4638|hsa:2982|hsa:2983|hsa:1259|hsa:480|hsa:5139|hsa:1388|hsa:476|hsa:490|hsa:5593|hsa:775|hsa:10335	http://www.kegg.jp/kegg-bin/show_pathway?hsa04022+hsa:23236+hsa:491+hsa:107+hsa:3710+hsa:5140+hsa:10398+hsa:150+hsa:5332+hsa:7225+hsa:153+hsa:5138+hsa:2770+hsa:6547+hsa:5592+hsa:5350+hsa:8654+hsa:208+hsa:4882+hsa:4775+hsa:27345+hsa:477+hsa:4208+hsa:4638+hsa:2982+hsa:2983+hsa:1259+hsa:480+hsa:5139+hsa:1388+hsa:476+hsa:490+hsa:5593+hsa:775+hsa:10335
hsa05217	Basal cell carcinoma	15	1268	61	7681	0.0676388	0.315054	0.245902	ENSG00000125845(BMP2)|ENSG00000154764(WNT7A)|ENSG00000108379(WNT3)|ENSG00000075290(WNT8B)|ENSG00000081059(TCF7)|ENSG00000002745(WNT16)|ENSG00000164161(HHIP)|ENSG00000111087(GLI1)|ENSG00000168646(AXIN2)|ENSG00000169884(WNT10B)|ENSG00000125084(WNT1)|ENSG00000099860(GADD45B)|ENSG00000185920(PTCH1)|ENSG00000138795(LEF1)|ENSG00000162552(WNT4)	hsa:650|hsa:7476|hsa:7473|hsa:7479|hsa:6932|hsa:51384|hsa:64399|hsa:2735|hsa:8313|hsa:7480|hsa:7471|hsa:4616|hsa:5727|hsa:51176|hsa:54361	http://www.kegg.jp/kegg-bin/show_pathway?hsa05217+hsa:650+hsa:7476+hsa:7473+hsa:7479+hsa:6932+hsa:51384+hsa:64399+hsa:2735+hsa:8313+hsa:7480+hsa:7471+hsa:4616+hsa:5727+hsa:51176+hsa:54361
hsa04148	Efferocytosis	33	1268	156	7681	0.0739597	0.340022	0.211538	ENSG00000182107(TMEM30B)|ENSG00000058404(CAMK2B)|ENSG00000137801(THBS1)|ENSG00000171044(XKR6)|ENSG00000185386(MAPK11)|ENSG00000183484(GPR132)|ENSG00000010327(STAB1)|ENSG00000113249(HAVCR1)|ENSG00000170989(S1PR1)|ENSG00000181790(ADGRB1)|ENSG00000118520(ARG1)|ENSG00000169398(PTK2)|ENSG00000158050(DUSP2)|ENSG00000072736(NFATC3)|ENSG00000081181(ARG2)|ENSG00000145850(TIMD4)|ENSG00000168329(CX3CR1)|ENS…	hsa:161291|hsa:816|hsa:7057|hsa:286046|hsa:5600|hsa:29933|hsa:23166|hsa:26762|hsa:1901|hsa:575|hsa:383|hsa:5747|hsa:1844|hsa:4775|hsa:384|hsa:91937|hsa:1524|hsa:9023|hsa:818|hsa:3690|hsa:4240|hsa:7040|hsa:1850|hsa:10396|hsa:3091|hsa:177|hsa:84465|hsa:5087|hsa:80824|hsa:3693|hsa:64805|hsa:5743|hsa:1788	http://www.kegg.jp/kegg-bin/show_pathway?hsa04148+hsa:161291+hsa:816+hsa:7057+hsa:286046+hsa:5600+hsa:29933+hsa:23166+hsa:26762+hsa:1901+hsa:575+hsa:383+hsa:5747+hsa:1844+hsa:4775+hsa:384+hsa:91937+hsa:1524+hsa:9023+hsa:818+hsa:3690+hsa:4240+hsa:7040+hsa:1850+hsa:10396+hsa:3091+hsa:177+hsa:84465+hsa:5087+hsa:80824+hsa:3693+hsa:64805+hsa:5743+hsa:1788
hsa04664	Fc epsilon RI signaling pathway	16	1268	67	7681	0.0757404	0.343745	0.238806	ENSG00000171608(PIK3CD)|ENSG00000185386(MAPK11)|ENSG00000124181(PLCG1)|ENSG00000154229(PRKCA)|ENSG00000149534(MS4A2)|ENSG00000145675(PIK3R1)|ENSG00000134215(VAV3)|ENSG00000034152(MAP2K3)|ENSG00000213658(LAT)|ENSG00000105221(AKT2)|ENSG00000010810(FYN)|ENSG00000232810(TNF)|ENSG00000109339(MAPK10)|ENSG00000043462(LCP2)|ENSG00000168918(INPP5D)|ENSG00000179639(FCER1A)	hsa:5293|hsa:5600|hsa:5335|hsa:5578|hsa:2206|hsa:5295|hsa:10451|hsa:5606|hsa:27040|hsa:208|hsa:2534|hsa:7124|hsa:5602|hsa:3937|hsa:3635|hsa:2205	http://www.kegg.jp/kegg-bin/show_pathway?hsa04664+hsa:5293+hsa:5600+hsa:5335+hsa:5578+hsa:2206+hsa:5295+hsa:10451+hsa:5606+hsa:27040+hsa:208+hsa:2534+hsa:7124+hsa:5602+hsa:3937+hsa:3635+hsa:2205
hsa05135	Yersinia infection	29	1268	136	7681	0.0824558	0.369486	0.213235	ENSG00000062598(ELMO2)|ENSG00000072133(RPS6KA6)|ENSG00000171855(IFNB1)|ENSG00000171608(PIK3CD)|ENSG00000107242(PIP5K1B)|ENSG00000185386(MAPK11)|ENSG00000172116(CD8B)|ENSG00000124181(PLCG1)|ENSG00000133627(ACTR3B)|ENSG00000145675(PIK3R1)|ENSG00000134215(VAV3)|ENSG00000034152(MAP2K3)|ENSG00000213658(LAT)|ENSG00000169398(PTK2)|ENSG00000105221(AKT2)|ENSG00000125538(IL1B)|ENSG00000072736(NFATC3)|ENSG0…	hsa:63916|hsa:27330|hsa:3456|hsa:5293|hsa:8395|hsa:5600|hsa:926|hsa:5335|hsa:57180|hsa:5295|hsa:10451|hsa:5606|hsa:27040|hsa:5747|hsa:208|hsa:3553|hsa:4775|hsa:7124|hsa:4792|hsa:5602|hsa:3937|hsa:2533|hsa:4790|hsa:927|hsa:114548|hsa:925|hsa:7535|hsa:2335|hsa:3676	http://www.kegg.jp/kegg-bin/show_pathway?hsa05135+hsa:63916+hsa:27330+hsa:3456+hsa:5293+hsa:8395+hsa:5600+hsa:926+hsa:5335+hsa:57180+hsa:5295+hsa:10451+hsa:5606+hsa:27040+hsa:5747+hsa:208+hsa:3553+hsa:4775+hsa:7124+hsa:4792+hsa:5602+hsa:3937+hsa:2533+hsa:4790+hsa:927+hsa:114548+hsa:925+hsa:7535+hsa:2335+hsa:3676
hsa04672	Intestinal immune network for IgA production	12	1268	48	7681	0.0862704	0.372436	0.25	ENSG00000102245(CD40LG)|ENSG00000198502(HLA-DRB5)|ENSG00000179344(HLA-DQB1)|ENSG00000159958(TNFRSF13C)|ENSG00000107562(CXCL12)|ENSG00000151882(CCL28)|ENSG00000163600(ICOS)|ENSG00000240505(TNFRSF13B)|ENSG00000105329(TGFB1)|ENSG00000178562(CD28)|ENSG00000173585(CCR9)|ENSG00000115232(ITGA4)	hsa:959|hsa:3127|hsa:3119|hsa:115650|hsa:6387|hsa:56477|hsa:29851|hsa:23495|hsa:7040|hsa:940|hsa:10803|hsa:3676	http://www.kegg.jp/kegg-bin/show_pathway?hsa04672+hsa:959+hsa:3127+hsa:3119+hsa:115650+hsa:6387+hsa:56477+hsa:29851+hsa:23495+hsa:7040+hsa:940+hsa:10803+hsa:3676
hsa04929	GnRH secretion	15	1268	63	7681	0.0854552	0.372436	0.238095	ENSG00000100346(CACNA1I)|ENSG00000182621(PLCB1)|ENSG00000164850(GPER1)|ENSG00000096433(ITPR3)|ENSG00000171608(PIK3CD)|ENSG00000101333(PLCB4)|ENSG00000154229(PRKCA)|ENSG00000145675(PIK3R1)|ENSG00000105221(AKT2)|ENSG00000072315(TRPC5)|ENSG00000162728(KCNJ9)|ENSG00000140009(ESR2)|ENSG00000166501(PRKCB)|ENSG00000105642(KCNN1)|ENSG00000151067(CACNA1C)	hsa:8911|hsa:23236|hsa:2852|hsa:3710|hsa:5293|hsa:5332|hsa:5578|hsa:5295|hsa:208|hsa:7224|hsa:3765|hsa:2100|hsa:5579|hsa:3780|hsa:775	http://www.kegg.jp/kegg-bin/show_pathway?hsa04929+hsa:8911+hsa:23236+hsa:2852+hsa:3710+hsa:5293+hsa:5332+hsa:5578+hsa:5295+hsa:208+hsa:7224+hsa:3765+hsa:2100+hsa:5579+hsa:3780+hsa:775
hsa05162	Measles	28	1268	131	7681	0.0847109	0.372436	0.21374	ENSG00000157601(MX1)|ENSG00000183486(MX2)|ENSG00000171855(IFNB1)|ENSG00000171791(BCL2)|ENSG00000171608(PIK3CD)|ENSG00000196664(TLR7)|ENSG00000114423(CBLB)|ENSG00000105173(CCNE1)|ENSG00000145675(PIK3R1)|ENSG00000213928(IRF9)|ENSG00000118503(TNFAIP3)|ENSG00000113302(IL12B)|ENSG00000105221(AKT2)|ENSG00000125538(IL1B)|ENSG00000107201(DDX58)|ENSG00000198851(CD3E)|ENSG00000117560(FASLG)|ENSG00000105639…	hsa:4599|hsa:4600|hsa:3456|hsa:596|hsa:5293|hsa:51284|hsa:868|hsa:898|hsa:5295|hsa:10379|hsa:7128|hsa:3593|hsa:208|hsa:3553|hsa:23586|hsa:916|hsa:356|hsa:3718|hsa:4792|hsa:5602|hsa:3442|hsa:940|hsa:4790|hsa:896|hsa:4938|hsa:4940|hsa:4939|hsa:5610	http://www.kegg.jp/kegg-bin/show_pathway?hsa05162+hsa:4599+hsa:4600+hsa:3456+hsa:596+hsa:5293+hsa:51284+hsa:868+hsa:898+hsa:5295+hsa:10379+hsa:7128+hsa:3593+hsa:208+hsa:3553+hsa:23586+hsa:916+hsa:356+hsa:3718+hsa:4792+hsa:5602+hsa:3442+hsa:940+hsa:4790+hsa:896+hsa:4938+hsa:4940+hsa:4939+hsa:5610
hsa01521	EGFR tyrosine kinase inhibitor resistance	18	1268	79	7681	0.0908156	0.387334	0.227848	ENSG00000171791(BCL2)|ENSG00000171608(PIK3CD)|ENSG00000157168(NRG1)|ENSG00000170962(PDGFD)|ENSG00000138798(EGF)|ENSG00000124181(PLCG1)|ENSG00000154229(PRKCA)|ENSG00000145675(PIK3R1)|ENSG00000140443(IGF1R)|ENSG00000105221(AKT2)|ENSG00000157764(BRAF)|ENSG00000113721(PDGFRB)|ENSG00000175634(RPS6KB2)|ENSG00000066468(FGFR2)|ENSG00000128052(KDR)|ENSG00000166501(PRKCB)|ENSG00000129946(SHC2)|ENSG00000153…	hsa:596|hsa:5293|hsa:3084|hsa:80310|hsa:1950|hsa:5335|hsa:5578|hsa:5295|hsa:3480|hsa:208|hsa:673|hsa:5159|hsa:6199|hsa:2263|hsa:3791|hsa:5579|hsa:25759|hsa:10018	http://www.kegg.jp/kegg-bin/show_pathway?hsa01521+hsa:596+hsa:5293+hsa:3084+hsa:80310+hsa:1950+hsa:5335+hsa:5578+hsa:5295+hsa:3480+hsa:208+hsa:673+hsa:5159+hsa:6199+hsa:2263+hsa:3791+hsa:5579+hsa:25759+hsa:10018
hsa04914	Progesterone-mediated oocyte maturation	24	1268	111	7681	0.0942371	0.397142	0.216216	ENSG00000072133(RPS6KA6)|ENSG00000164742(ADCY1)|ENSG00000152270(PDE3B)|ENSG00000171608(PIK3CD)|ENSG00000185386(MAPK11)|ENSG00000082175(PGR)|ENSG00000127955(GNAI1)|ENSG00000163806(SPDYA)|ENSG00000127564(PKMYT1)|ENSG00000176248(ANAPC2)|ENSG00000145675(PIK3R1)|ENSG00000072786(STK10)|ENSG00000140443(IGF1R)|ENSG00000105221(AKT2)|ENSG00000214300(SPDYE3)|ENSG00000157764(BRAF)|ENSG00000166851(PLK1)|ENSG0…	hsa:27330|hsa:107|hsa:5140|hsa:5293|hsa:5600|hsa:5241|hsa:2770|hsa:245711|hsa:9088|hsa:29882|hsa:5295|hsa:6793|hsa:3480|hsa:208|hsa:441272|hsa:673|hsa:5347|hsa:890|hsa:5602|hsa:5567|hsa:442572|hsa:995|hsa:993|hsa:699	http://www.kegg.jp/kegg-bin/show_pathway?hsa04914+hsa:27330+hsa:107+hsa:5140+hsa:5293+hsa:5600+hsa:5241+hsa:2770+hsa:245711+hsa:9088+hsa:29882+hsa:5295+hsa:6793+hsa:3480+hsa:208+hsa:441272+hsa:673+hsa:5347+hsa:890+hsa:5602+hsa:5567+hsa:442572+hsa:995+hsa:993+hsa:699
hsa04720	Long-term potentiation	15	1268	64	7681	0.0953895	0.397269	0.234375	ENSG00000182621(PLCB1)|ENSG00000072133(RPS6KA6)|ENSG00000164742(ADCY1)|ENSG00000058404(CAMK2B)|ENSG00000096433(ITPR3)|ENSG00000101333(PLCB4)|ENSG00000152495(CAMK4)|ENSG00000154229(PRKCA)|ENSG00000176884(GRIN1)|ENSG00000161509(GRIN2C)|ENSG00000157764(BRAF)|ENSG00000148660(CAMK2G)|ENSG00000142875(PRKACB)|ENSG00000166501(PRKCB)|ENSG00000151067(CACNA1C)	hsa:23236|hsa:27330|hsa:107|hsa:816|hsa:3710|hsa:5332|hsa:814|hsa:5578|hsa:2902|hsa:2905|hsa:673|hsa:818|hsa:5567|hsa:5579|hsa:775	http://www.kegg.jp/kegg-bin/show_pathway?hsa04720+hsa:23236+hsa:27330+hsa:107+hsa:816+hsa:3710+hsa:5332+hsa:814+hsa:5578+hsa:2902+hsa:2905+hsa:673+hsa:818+hsa:5567+hsa:5579+hsa:775
hsa05030	Cocaine addiction	11	1268	44	7681	0.0978751	0.400053	0.25	ENSG00000131771(PPP1R1B)|ENSG00000176749(CDK5R1)|ENSG00000165646(SLC18A2)|ENSG00000164082(GRM2)|ENSG00000127955(GNAI1)|ENSG00000176884(GRIN1)|ENSG00000161509(GRIN2C)|ENSG00000213676(ATF6B)|ENSG00000142875(PRKACB)|ENSG00000109320(NFKB1)|ENSG00000198822(GRM3)	hsa:84152|hsa:8851|hsa:6571|hsa:2912|hsa:2770|hsa:2902|hsa:2905|hsa:1388|hsa:5567|hsa:4790|hsa:2913	http://www.kegg.jp/kegg-bin/show_pathway?hsa05030+hsa:84152+hsa:8851+hsa:6571+hsa:2912+hsa:2770+hsa:2902+hsa:2905+hsa:1388+hsa:5567+hsa:4790+hsa:2913
hsa05169	Epstein-Barr virus infection	39	1268	193	7681	0.0983182	0.400053	0.202073	ENSG00000171855(IFNB1)|ENSG00000171791(BCL2)|ENSG00000168032(ENTPD3)|ENSG00000198502(HLA-DRB5)|ENSG00000179344(HLA-DQB1)|ENSG00000171608(PIK3CD)|ENSG00000185386(MAPK11)|ENSG00000101412(E2F1)|ENSG00000105173(CCNE1)|ENSG00000136997(MYC)|ENSG00000145675(PIK3R1)|ENSG00000213928(IRF9)|ENSG00000034152(MAP2K3)|ENSG00000118503(TNFAIP3)|ENSG00000104856(RELB)|ENSG00000105221(AKT2)|ENSG00000169375(SIN3A)|EN…	hsa:3456|hsa:596|hsa:956|hsa:3127|hsa:3119|hsa:5293|hsa:5600|hsa:1869|hsa:898|hsa:4609|hsa:5295|hsa:10379|hsa:5606|hsa:7128|hsa:5971|hsa:208|hsa:25942|hsa:23586|hsa:7124|hsa:916|hsa:3718|hsa:4792|hsa:890|hsa:5602|hsa:4616|hsa:8737|hsa:3442|hsa:4734|hsa:4790|hsa:1870|hsa:896|hsa:4938|hsa:4940|hsa:4939|hsa:864|hsa:919|hsa:10018|hsa:5610|hsa:9636	http://www.kegg.jp/kegg-bin/show_pathway?hsa05169+hsa:3456+hsa:596+hsa:956+hsa:3127+hsa:3119+hsa:5293+hsa:5600+hsa:1869+hsa:898+hsa:4609+hsa:5295+hsa:10379+hsa:5606+hsa:7128+hsa:5971+hsa:208+hsa:25942+hsa:23586+hsa:7124+hsa:916+hsa:3718+hsa:4792+hsa:890+hsa:5602+hsa:4616+hsa:8737+hsa:3442+hsa:4734+hsa:4790+hsa:1870+hsa:896+hsa:4938+hsa:4940+hsa:4939+hsa:864+hsa:919+hsa:10018+hsa:5610+hsa:9636
hsa05161	Hepatitis B	32	1268	155	7681	0.100447	0.401491	0.206452	ENSG00000171855(IFNB1)|ENSG00000179388(EGR3)|ENSG00000171791(BCL2)|ENSG00000171608(PIK3CD)|ENSG00000185386(MAPK11)|ENSG00000101412(E2F1)|ENSG00000163513(TGFBR2)|ENSG00000105173(CCNE1)|ENSG00000154229(PRKCA)|ENSG00000136997(MYC)|ENSG00000145675(PIK3R1)|ENSG00000034152(MAP2K3)|ENSG00000105221(AKT2)|ENSG00000072736(NFATC3)|ENSG00000157764(BRAF)|ENSG00000107201(DDX58)|ENSG00000232810(TNF)|ENSG0000011…	hsa:3456|hsa:1960|hsa:596|hsa:5293|hsa:5600|hsa:1869|hsa:7048|hsa:898|hsa:5578|hsa:4609|hsa:5295|hsa:5606|hsa:208|hsa:4775|hsa:673|hsa:23586|hsa:7124|hsa:356|hsa:3718|hsa:4792|hsa:890|hsa:5602|hsa:3442|hsa:4088|hsa:7040|hsa:1388|hsa:6775|hsa:5579|hsa:4790|hsa:1870|hsa:332|hsa:3339	http://www.kegg.jp/kegg-bin/show_pathway?hsa05161+hsa:3456+hsa:1960+hsa:596+hsa:5293+hsa:5600+hsa:1869+hsa:7048+hsa:898+hsa:5578+hsa:4609+hsa:5295+hsa:5606+hsa:208+hsa:4775+hsa:673+hsa:23586+hsa:7124+hsa:356+hsa:3718+hsa:4792+hsa:890+hsa:5602+hsa:3442+hsa:4088+hsa:7040+hsa:1388+hsa:6775+hsa:5579+hsa:4790+hsa:1870+hsa:332+hsa:3339
hsa05207	Chemical carcinogenesis - receptor activation	38	1268	188	7681	0.101337	0.401491	0.202128	ENSG00000102678(FGF9)|ENSG00000072133(RPS6KA6)|ENSG00000164742(ADCY1)|ENSG00000171791(BCL2)|ENSG00000171608(PIK3CD)|ENSG00000120915(EPHX2)|ENSG00000094804(CDC6)|ENSG00000101412(E2F1)|ENSG00000140505(CYP1A2)|ENSG00000043591(ADRB1)|ENSG00000169083(AR)|ENSG00000082175(PGR)|ENSG00000135226(UGT2B28)|ENSG00000127955(GNAI1)|ENSG00000138798(EGF)|ENSG00000154229(PRKCA)|ENSG00000136997(MYC)|ENSG00000145675…	hsa:2254|hsa:27330|hsa:107|hsa:596|hsa:5293|hsa:2053|hsa:990|hsa:1869|hsa:1544|hsa:153|hsa:367|hsa:5241|hsa:54490|hsa:2770|hsa:1950|hsa:5578|hsa:4609|hsa:5295|hsa:2949|hsa:2946|hsa:208|hsa:2944|hsa:2938|hsa:2100|hsa:7471|hsa:6199|hsa:1388|hsa:406890|hsa:773|hsa:5567|hsa:5579|hsa:4790|hsa:896|hsa:7367|hsa:332|hsa:993|hsa:775|hsa:253152	http://www.kegg.jp/kegg-bin/show_pathway?hsa05207+hsa:2254+hsa:27330+hsa:107+hsa:596+hsa:5293+hsa:2053+hsa:990+hsa:1869+hsa:1544+hsa:153+hsa:367+hsa:5241+hsa:54490+hsa:2770+hsa:1950+hsa:5578+hsa:4609+hsa:5295+hsa:2949+hsa:2946+hsa:208+hsa:2944+hsa:2938+hsa:2100+hsa:7471+hsa:6199+hsa:1388+hsa:406890+hsa:773+hsa:5567+hsa:5579+hsa:4790+hsa:896+hsa:7367+hsa:332+hsa:993+hsa:775+hsa:253152
hsa05214	Glioma	17	1268	75	7681	0.102074	0.401491	0.226667	ENSG00000058404(CAMK2B)|ENSG00000171608(PIK3CD)|ENSG00000101412(E2F1)|ENSG00000152495(CAMK4)|ENSG00000138798(EGF)|ENSG00000124181(PLCG1)|ENSG00000154229(PRKCA)|ENSG00000145675(PIK3R1)|ENSG00000140443(IGF1R)|ENSG00000105221(AKT2)|ENSG00000157764(BRAF)|ENSG00000113721(PDGFRB)|ENSG00000148660(CAMK2G)|ENSG00000099860(GADD45B)|ENSG00000166501(PRKCB)|ENSG00000007968(E2F2)|ENSG00000129946(SHC2)	hsa:816|hsa:5293|hsa:1869|hsa:814|hsa:1950|hsa:5335|hsa:5578|hsa:5295|hsa:3480|hsa:208|hsa:673|hsa:5159|hsa:818|hsa:4616|hsa:5579|hsa:1870|hsa:25759	http://www.kegg.jp/kegg-bin/show_pathway?hsa05214+hsa:816+hsa:5293+hsa:1869+hsa:814+hsa:1950+hsa:5335+hsa:5578+hsa:5295+hsa:3480+hsa:208+hsa:673+hsa:5159+hsa:818+hsa:4616+hsa:5579+hsa:1870+hsa:25759
hsa04261	Adrenergic signaling in cardiomyocytes	31	1268	150	7681	0.103488	0.401875	0.206667	ENSG00000182621(PLCB1)|ENSG00000157087(ATP2B2)|ENSG00000164742(ADCY1)|ENSG00000171791(BCL2)|ENSG00000058404(CAMK2B)|ENSG00000185386(MAPK11)|ENSG00000157445(CACNA2D3)|ENSG00000101333(PLCB4)|ENSG00000043591(ADRB1)|ENSG00000198336(MYL4)|ENSG00000127955(GNAI1)|ENSG00000100678(SLC8A3)|ENSG00000198523(PLN)|ENSG00000198467(TPM2)|ENSG00000154229(PRKCA)|ENSG00000075461(CACNG4)|ENSG00000105221(AKT2)|ENSG00…	hsa:23236|hsa:491|hsa:107|hsa:596|hsa:816|hsa:5600|hsa:55799|hsa:5332|hsa:153|hsa:4635|hsa:2770|hsa:6547|hsa:5350|hsa:7169|hsa:5578|hsa:27092|hsa:208|hsa:11069|hsa:783|hsa:477|hsa:818|hsa:480|hsa:1388|hsa:6262|hsa:5567|hsa:476|hsa:490|hsa:59283|hsa:775|hsa:785|hsa:183	http://www.kegg.jp/kegg-bin/show_pathway?hsa04261+hsa:23236+hsa:491+hsa:107+hsa:596+hsa:816+hsa:5600+hsa:55799+hsa:5332+hsa:153+hsa:4635+hsa:2770+hsa:6547+hsa:5350+hsa:7169+hsa:5578+hsa:27092+hsa:208+hsa:11069+hsa:783+hsa:477+hsa:818+hsa:480+hsa:1388+hsa:6262+hsa:5567+hsa:476+hsa:490+hsa:59283+hsa:775+hsa:785+hsa:183
hsa05323	Rheumatoid arthritis	20	1268	91	7681	0.104442	0.401875	0.21978	ENSG00000102755(FLT1)|ENSG00000198502(HLA-DRB5)|ENSG00000277632(CCL3)|ENSG00000179344(HLA-DQB1)|ENSG00000276085(CCL3L1)|ENSG00000276085(CCL3L1)|ENSG00000107562(CXCL12)|ENSG00000105929(ATP6V0A4)|ENSG00000112115(IL17A)|ENSG00000125538(IL1B)|ENSG00000232810(TNF)|ENSG00000227507(LTB)|ENSG00000213760(ATP6V1G2)|ENSG00000154188(ANGPT1)|ENSG00000163599(CTLA4)|ENSG00000105329(TGFB1)|ENSG00000178562(CD28)|…	hsa:2321|hsa:3127|hsa:6348|hsa:3119|hsa:6349|hsa:414062|hsa:6387|hsa:50617|hsa:3605|hsa:3553|hsa:7124|hsa:4050|hsa:534|hsa:284|hsa:1493|hsa:7040|hsa:940|hsa:155066|hsa:127124|hsa:6352	http://www.kegg.jp/kegg-bin/show_pathway?hsa05323+hsa:2321+hsa:3127+hsa:6348+hsa:3119+hsa:6349+hsa:414062+hsa:6387+hsa:50617+hsa:3605+hsa:3553+hsa:7124+hsa:4050+hsa:534+hsa:284+hsa:1493+hsa:7040+hsa:940+hsa:155066+hsa:127124+hsa:6352
hsa00512	Mucin type O-glycan biosynthesis	9	1268	35	7681	0.110545	0.402741	0.257143	ENSG00000110328(GALNT18)|ENSG00000100626(GALNT16)|ENSG00000176928(GCNT4)|ENSG00000184005(ST6GALNAC3)|ENSG00000158089(GALNT14)|ENSG00000182870(GALNT9)|ENSG00000136542(GALNT5)|ENSG00000070526(ST6GALNAC1)|ENSG00000115339(GALNT3)	hsa:374378|hsa:57452|hsa:51301|hsa:256435|hsa:79623|hsa:50614|hsa:11227|hsa:55808|hsa:2591	http://www.kegg.jp/kegg-bin/show_pathway?hsa00512+hsa:374378+hsa:57452+hsa:51301+hsa:256435+hsa:79623+hsa:50614+hsa:11227+hsa:55808+hsa:2591
hsa00604	Glycosphingolipid biosynthesis - ganglio series	5	1268	16	7681	0.109608	0.402741	0.3125	ENSG00000101638(ST8SIA5)|ENSG00000117069(ST6GALNAC5)|ENSG00000184005(ST6GALNAC3)|ENSG00000160408(ST6GALNAC6)|ENSG00000115525(ST3GAL5)	hsa:29906|hsa:81849|hsa:256435|hsa:30815|hsa:8869	http://www.kegg.jp/kegg-bin/show_pathway?hsa00604+hsa:29906+hsa:81849+hsa:256435+hsa:30815+hsa:8869
hsa04210	Apoptosis	28	1268	135	7681	0.113243	0.402741	0.207407	ENSG00000102699(PARP4)|ENSG00000178462(TUBAL3)|ENSG00000171791(BCL2)|ENSG00000096433(ITPR3)|ENSG00000180644(PRF1)|ENSG00000171608(PIK3CD)|ENSG00000056558(TRAF1)|ENSG00000121858(TNFSF10)|ENSG00000145675(PIK3R1)|ENSG00000105221(AKT2)|ENSG00000163629(PTPN13)|ENSG00000232810(TNF)|ENSG00000117560(FASLG)|ENSG00000100906(NFKBIA)|ENSG00000109339(MAPK10)|ENSG00000099860(GADD45B)|ENSG00000137275(RIPK1)|ENS…	hsa:143|hsa:79861|hsa:596|hsa:3710|hsa:5551|hsa:5293|hsa:7185|hsa:8743|hsa:5295|hsa:208|hsa:5783|hsa:7124|hsa:356|hsa:4792|hsa:5602|hsa:4616|hsa:8737|hsa:8722|hsa:8739|hsa:1521|hsa:4790|hsa:56616|hsa:112714|hsa:332|hsa:472|hsa:10018|hsa:7277|hsa:4914	http://www.kegg.jp/kegg-bin/show_pathway?hsa04210+hsa:143+hsa:79861+hsa:596+hsa:3710+hsa:5551+hsa:5293+hsa:7185+hsa:8743+hsa:5295+hsa:208+hsa:5783+hsa:7124+hsa:356+hsa:4792+hsa:5602+hsa:4616+hsa:8737+hsa:8722+hsa:8739+hsa:1521+hsa:4790+hsa:56616+hsa:112714+hsa:332+hsa:472+hsa:10018+hsa:7277+hsa:4914
hsa04658	Th1 and Th2 cell differentiation	20	1268	92	7681	0.113769	0.402741	0.217391	ENSG00000065675(PRKCQ)|ENSG00000107485(GATA3)|ENSG00000198502(HLA-DRB5)|ENSG00000179344(HLA-DQB1)|ENSG00000185386(MAPK11)|ENSG00000184384(MAML2)|ENSG00000124181(PLCG1)|ENSG00000213658(LAT)|ENSG00000113302(IL12B)|ENSG00000196782(MAML3)|ENSG00000072736(NFATC3)|ENSG00000198851(CD3E)|ENSG00000105639(JAK3)|ENSG00000100906(NFKBIA)|ENSG00000109339(MAPK10)|ENSG00000138378(STAT4)|ENSG00000109320(NFKB1)|EN…	hsa:5588|hsa:2625|hsa:3127|hsa:3119|hsa:5600|hsa:84441|hsa:5335|hsa:27040|hsa:3593|hsa:55534|hsa:4775|hsa:916|hsa:3718|hsa:4792|hsa:5602|hsa:6775|hsa:4790|hsa:7535|hsa:864|hsa:919	http://www.kegg.jp/kegg-bin/show_pathway?hsa04658+hsa:5588+hsa:2625+hsa:3127+hsa:3119+hsa:5600+hsa:84441+hsa:5335+hsa:27040+hsa:3593+hsa:55534+hsa:4775+hsa:916+hsa:3718+hsa:4792+hsa:5602+hsa:6775+hsa:4790+hsa:7535+hsa:864+hsa:919
hsa04670	Leukocyte transendothelial migration	23	1268	108	7681	0.113459	0.402741	0.212963	ENSG00000134873(CLDN10)|ENSG00000171608(PIK3CD)|ENSG00000101335(MYL9)|ENSG00000185386(MAPK11)|ENSG00000127955(GNAI1)|ENSG00000107562(CXCL12)|ENSG00000184113(CLDN5)|ENSG00000035403(VCL)|ENSG00000166086(JAM3)|ENSG00000124181(PLCG1)|ENSG00000154229(PRKCA)|ENSG00000149564(ESAM)|ENSG00000145675(PIK3R1)|ENSG00000134215(VAV3)|ENSG00000169398(PTK2)|ENSG00000171217(CLDN20)|ENSG00000091428(RAPGEF4)|ENSG000…	hsa:9071|hsa:5293|hsa:10398|hsa:5600|hsa:2770|hsa:6387|hsa:7122|hsa:7414|hsa:83700|hsa:5335|hsa:5578|hsa:90952|hsa:5295|hsa:10451|hsa:5747|hsa:49861|hsa:11069|hsa:7294|hsa:7430|hsa:5010|hsa:3702|hsa:5579|hsa:3676	http://www.kegg.jp/kegg-bin/show_pathway?hsa04670+hsa:9071+hsa:5293+hsa:10398+hsa:5600+hsa:2770+hsa:6387+hsa:7122+hsa:7414+hsa:83700+hsa:5335+hsa:5578+hsa:90952+hsa:5295+hsa:10451+hsa:5747+hsa:49861+hsa:11069+hsa:7294+hsa:7430+hsa:5010+hsa:3702+hsa:5579+hsa:3676
hsa04742	Taste transduction	18	1268	81	7681	0.109672	0.402741	0.222222	ENSG00000182621(PLCB1)|ENSG00000212126(TAS2R50)|ENSG00000121318(TAS2R10)|ENSG00000256436(TAS2R31)|ENSG00000256188(TAS2R30)|ENSG00000186136(TAS2R42)|ENSG00000096433(ITPR3)|ENSG00000101333(PLCB4)|ENSG00000127366(TAS2R5)|ENSG00000169432(SCN9A)|ENSG00000141837(CACNA1A)|ENSG00000142875(PRKACB)|ENSG00000133019(CHRM3)|ENSG00000153253(SCN3A)|ENSG00000179097(HTR1F)|ENSG00000151067(CACNA1C)|ENSG00000166736…	hsa:23236|hsa:259296|hsa:50839|hsa:259290|hsa:259293|hsa:353164|hsa:3710|hsa:5332|hsa:54429|hsa:6335|hsa:773|hsa:5567|hsa:1131|hsa:6328|hsa:3355|hsa:775|hsa:3359|hsa:6326	http://www.kegg.jp/kegg-bin/show_pathway?hsa04742+hsa:23236+hsa:259296+hsa:50839+hsa:259290+hsa:259293+hsa:353164+hsa:3710+hsa:5332+hsa:54429+hsa:6335+hsa:773+hsa:5567+hsa:1131+hsa:6328+hsa:3355+hsa:775+hsa:3359+hsa:6326
hsa04916	Melanogenesis	21	1268	97	7681	0.110752	0.402741	0.216495	ENSG00000182621(PLCB1)|ENSG00000154764(WNT7A)|ENSG00000078401(EDN1)|ENSG00000164742(ADCY1)|ENSG00000058404(CAMK2B)|ENSG00000101333(PLCB4)|ENSG00000108379(WNT3)|ENSG00000075290(WNT8B)|ENSG00000127955(GNAI1)|ENSG00000049130(KITLG)|ENSG00000081059(TCF7)|ENSG00000154229(PRKCA)|ENSG00000002745(WNT16)|ENSG00000087258(GNAO1)|ENSG00000169884(WNT10B)|ENSG00000125084(WNT1)|ENSG00000148660(CAMK2G)|ENSG00000…	hsa:23236|hsa:7476|hsa:1906|hsa:107|hsa:816|hsa:5332|hsa:7473|hsa:7479|hsa:2770|hsa:4254|hsa:6932|hsa:5578|hsa:51384|hsa:2775|hsa:7480|hsa:7471|hsa:818|hsa:51176|hsa:5567|hsa:5579|hsa:54361	http://www.kegg.jp/kegg-bin/show_pathway?hsa04916+hsa:23236+hsa:7476+hsa:1906+hsa:107+hsa:816+hsa:5332+hsa:7473+hsa:7479+hsa:2770+hsa:4254+hsa:6932+hsa:5578+hsa:51384+hsa:2775+hsa:7480+hsa:7471+hsa:818+hsa:51176+hsa:5567+hsa:5579+hsa:54361
hsa05220	Chronic myeloid leukemia	17	1268	76	7681	0.112272	0.402741	0.223684	ENSG00000171608(PIK3CD)|ENSG00000101412(E2F1)|ENSG00000186716(BCR)|ENSG00000163513(TGFBR2)|ENSG00000136997(MYC)|ENSG00000145675(PIK3R1)|ENSG00000105221(AKT2)|ENSG00000085276(MECOM)|ENSG00000157764(BRAF)|ENSG00000100906(NFKBIA)|ENSG00000099860(GADD45B)|ENSG00000159692(CTBP1)|ENSG00000166949(SMAD3)|ENSG00000105329(TGFB1)|ENSG00000109320(NFKB1)|ENSG00000007968(E2F2)|ENSG00000129946(SHC2)	hsa:5293|hsa:1869|hsa:613|hsa:7048|hsa:4609|hsa:5295|hsa:208|hsa:2122|hsa:673|hsa:4792|hsa:4616|hsa:1487|hsa:4088|hsa:7040|hsa:4790|hsa:1870|hsa:25759	http://www.kegg.jp/kegg-bin/show_pathway?hsa05220+hsa:5293+hsa:1869+hsa:613+hsa:7048+hsa:4609+hsa:5295+hsa:208+hsa:2122+hsa:673+hsa:4792+hsa:4616+hsa:1487+hsa:4088+hsa:7040+hsa:4790+hsa:1870+hsa:25759
hsa05163	Human cytomegalovirus infection	43	1268	218	7681	0.115512	0.404864	0.197248	ENSG00000182621(PLCB1)|ENSG00000186469(GNG2)|ENSG00000171855(IFNB1)|ENSG00000164742(ADCY1)|ENSG00000096433(ITPR3)|ENSG00000277632(CCL3)|ENSG00000171608(PIK3CD)|ENSG00000185386(MAPK11)|ENSG00000275302(CCL4)|ENSG00000276085(CCL3L1)|ENSG00000276085(CCL3L1)|ENSG00000101412(E2F1)|ENSG00000276070(CCL4L2)|ENSG00000276070(CCL4L2)|ENSG00000101333(PLCB4)|ENSG00000127920(GNG11)|ENSG00000127955(GNAI1)|ENSG00…	hsa:23236|hsa:54331|hsa:3456|hsa:107|hsa:3710|hsa:6348|hsa:5293|hsa:5600|hsa:6351|hsa:6349|hsa:414062|hsa:1869|hsa:9560|hsa:388372|hsa:5332|hsa:2791|hsa:2770|hsa:6387|hsa:5578|hsa:4609|hsa:5295|hsa:5747|hsa:208|hsa:3553|hsa:94235|hsa:2775|hsa:4775|hsa:7124|hsa:356|hsa:4792|hsa:8737|hsa:3690|hsa:3442|hsa:6199|hsa:10681|hsa:1388|hsa:5567|hsa:5579|hsa:4790|hsa:1870|hsa:6352|hsa:5743|hsa:5733	http://www.kegg.jp/kegg-bin/show_pathway?hsa05163+hsa:23236+hsa:54331+hsa:3456+hsa:107+hsa:3710+hsa:6348+hsa:5293+hsa:5600+hsa:6351+hsa:6349+hsa:414062+hsa:1869+hsa:9560+hsa:388372+hsa:5332+hsa:2791+hsa:2770+hsa:6387+hsa:5578+hsa:4609+hsa:5295+hsa:5747+hsa:208+hsa:3553+hsa:94235+hsa:2775+hsa:4775+hsa:7124+hsa:356+hsa:4792+hsa:8737+hsa:3690+hsa:3442+hsa:6199+hsa:10681+hsa:1388+hsa:5567+hsa:5579+hs…
hsa04612	Antigen processing and presentation	16	1268	72	7681	0.126202	0.429571	0.222222	ENSG00000183542(KLRC4)|ENSG00000134539(KLRD1)|ENSG00000198502(HLA-DRB5)|ENSG00000179344(HLA-DQB1)|ENSG00000242019(KIR3DL3)|ENSG00000243772(KIR2DL3)|ENSG00000125498(KIR2DL1)|ENSG00000167633(KIR3DL1)|ENSG00000221957(KIR2DS4)|ENSG00000240403(KIR3DL2)|ENSG00000172116(CD8B)|ENSG00000205810(KLRC3)|ENSG00000232810(TNF)|ENSG00000134545(KLRC1)|ENSG00000254126(CD8B2)|ENSG00000153563(CD8A)	hsa:8302|hsa:3824|hsa:3127|hsa:3119|hsa:115653|hsa:3804|hsa:3802|hsa:3811|hsa:3809|hsa:3812|hsa:926|hsa:3823|hsa:7124|hsa:3821|hsa:927|hsa:925	http://www.kegg.jp/kegg-bin/show_pathway?hsa04612+hsa:8302+hsa:3824+hsa:3127+hsa:3119+hsa:115653+hsa:3804+hsa:3802+hsa:3811+hsa:3809+hsa:3812+hsa:926+hsa:3823+hsa:7124+hsa:3821+hsa:927+hsa:925
hsa04918	Thyroid hormone synthesis	16	1268	72	7681	0.126202	0.429571	0.222222	ENSG00000182621(PLCB1)|ENSG00000164742(ADCY1)|ENSG00000096433(ITPR3)|ENSG00000115705(TPO)|ENSG00000164294(GPX8)|ENSG00000101333(PLCB4)|ENSG00000154229(PRKCA)|ENSG00000116157(GPX7)|ENSG00000042832(TG)|ENSG00000018625(ATP1A2)|ENSG00000176153(GPX2)|ENSG00000132681(ATP1A4)|ENSG00000213676(ATF6B)|ENSG00000142875(PRKACB)|ENSG00000166501(PRKCB)|ENSG00000163399(ATP1A1)	hsa:23236|hsa:107|hsa:3710|hsa:7173|hsa:493869|hsa:5332|hsa:5578|hsa:2882|hsa:7038|hsa:477|hsa:2877|hsa:480|hsa:1388|hsa:5567|hsa:5579|hsa:476	http://www.kegg.jp/kegg-bin/show_pathway?hsa04918+hsa:23236+hsa:107+hsa:3710+hsa:7173+hsa:493869+hsa:5332+hsa:5578+hsa:2882+hsa:7038+hsa:477+hsa:2877+hsa:480+hsa:1388+hsa:5567+hsa:5579+hsa:476
hsa05224	Breast cancer	29	1268	142	7681	0.125554	0.429571	0.204225	ENSG00000102678(FGF9)|ENSG00000180138(CSNK1A1L)|ENSG00000154764(WNT7A)|ENSG00000070018(LRP6)|ENSG00000171608(PIK3CD)|ENSG00000101412(E2F1)|ENSG00000164683(HEY1)|ENSG00000108379(WNT3)|ENSG00000075290(WNT8B)|ENSG00000082175(PGR)|ENSG00000138798(EGF)|ENSG00000081059(TCF7)|ENSG00000136997(MYC)|ENSG00000002745(WNT16)|ENSG00000145675(PIK3R1)|ENSG00000140443(IGF1R)|ENSG00000105221(AKT2)|ENSG00000157764(…	hsa:2254|hsa:122011|hsa:7476|hsa:4040|hsa:5293|hsa:1869|hsa:23462|hsa:7473|hsa:7479|hsa:5241|hsa:1950|hsa:6932|hsa:4609|hsa:51384|hsa:5295|hsa:3480|hsa:208|hsa:673|hsa:8313|hsa:2100|hsa:7480|hsa:7471|hsa:4616|hsa:6199|hsa:2260|hsa:51176|hsa:1870|hsa:25759|hsa:54361	http://www.kegg.jp/kegg-bin/show_pathway?hsa05224+hsa:2254+hsa:122011+hsa:7476+hsa:4040+hsa:5293+hsa:1869+hsa:23462+hsa:7473+hsa:7479+hsa:5241+hsa:1950+hsa:6932+hsa:4609+hsa:51384+hsa:5295+hsa:3480+hsa:208+hsa:673+hsa:8313+hsa:2100+hsa:7480+hsa:7471+hsa:4616+hsa:6199+hsa:2260+hsa:51176+hsa:1870+hsa:25759+hsa:54361
hsa04810	Regulation of actin cytoskeleton	43	1268	221	7681	0.135062	0.451055	0.19457	ENSG00000102678(FGF9)|ENSG00000182957(SPATA13)|ENSG00000139734(DIAPH3)|ENSG00000133818(RRAS2)|ENSG00000171608(PIK3CD)|ENSG00000107242(PIP5K1B)|ENSG00000101335(MYL9)|ENSG00000164171(ITGA2)|ENSG00000170962(PDGFD)|ENSG00000107562(CXCL12)|ENSG00000138798(EGF)|ENSG00000035403(VCL)|ENSG00000165410(CFL2)|ENSG00000133627(ACTR3B)|ENSG00000145675(PIK3R1)|ENSG00000134215(VAV3)|ENSG00000112290(WASF1)|ENSG000…	hsa:2254|hsa:221178|hsa:81624|hsa:22800|hsa:5293|hsa:8395|hsa:10398|hsa:3673|hsa:80310|hsa:6387|hsa:1950|hsa:7414|hsa:1073|hsa:57180|hsa:5295|hsa:10451|hsa:8936|hsa:5747|hsa:208|hsa:26999|hsa:3687|hsa:3681|hsa:673|hsa:8515|hsa:7430|hsa:5159|hsa:85464|hsa:4638|hsa:57121|hsa:3690|hsa:2263|hsa:4629|hsa:2260|hsa:4628|hsa:50649|hsa:1131|hsa:1128|hsa:3645|hsa:3693|hsa:3674|hsa:2335|hsa:3676|hsa:3655	http://www.kegg.jp/kegg-bin/show_pathway?hsa04810+hsa:2254+hsa:221178+hsa:81624+hsa:22800+hsa:5293+hsa:8395+hsa:10398+hsa:3673+hsa:80310+hsa:6387+hsa:1950+hsa:7414+hsa:1073+hsa:57180+hsa:5295+hsa:10451+hsa:8936+hsa:5747+hsa:208+hsa:26999+hsa:3687+hsa:3681+hsa:673+hsa:8515+hsa:7430+hsa:5159+hsa:85464+hsa:4638+hsa:57121+hsa:3690+hsa:2263+hsa:4629+hsa:2260+hsa:4628+hsa:50649+hsa:1131+hsa:1128+hsa:36…
hsa04972	Pancreatic secretion	20	1268	94	7681	0.133902	0.451055	0.212766	ENSG00000041353(RAB27B)|ENSG00000182621(PLCB1)|ENSG00000157087(ATP2B2)|ENSG00000164742(ADCY1)|ENSG00000096433(ITPR3)|ENSG00000101333(PLCB4)|ENSG00000091138(SLC26A3)|ENSG00000154229(PRKCA)|ENSG00000163751(CPA3)|ENSG00000004468(CD38)|ENSG00000018625(ATP1A2)|ENSG00000010438(PRSS3)|ENSG00000070031(SCT)|ENSG00000132681(ATP1A4)|ENSG00000080493(SLC4A4)|ENSG00000198626(RYR2)|ENSG00000166501(PRKCB)|ENSG00…	hsa:5874|hsa:23236|hsa:491|hsa:107|hsa:3710|hsa:5332|hsa:1811|hsa:5578|hsa:1359|hsa:952|hsa:477|hsa:5646|hsa:6343|hsa:480|hsa:8671|hsa:6262|hsa:5579|hsa:476|hsa:490|hsa:1131	http://www.kegg.jp/kegg-bin/show_pathway?hsa04972+hsa:5874+hsa:23236+hsa:491+hsa:107+hsa:3710+hsa:5332+hsa:1811+hsa:5578+hsa:1359+hsa:952+hsa:477+hsa:5646+hsa:6343+hsa:480+hsa:8671+hsa:6262+hsa:5579+hsa:476+hsa:490+hsa:1131
hsa04961	Endocrine and other factor-regulated calcium reabsorption	12	1268	52	7681	0.138192	0.452962	0.230769	ENSG00000182621(PLCB1)|ENSG00000157087(ATP2B2)|ENSG00000101333(PLCB4)|ENSG00000100678(SLC8A3)|ENSG00000154229(PRKCA)|ENSG00000018625(ATP1A2)|ENSG00000197959(DNM3)|ENSG00000132681(ATP1A4)|ENSG00000142875(PRKACB)|ENSG00000166501(PRKCB)|ENSG00000163399(ATP1A1)|ENSG00000070961(ATP2B1)	hsa:23236|hsa:491|hsa:5332|hsa:6547|hsa:5578|hsa:477|hsa:26052|hsa:480|hsa:5567|hsa:5579|hsa:476|hsa:490	http://www.kegg.jp/kegg-bin/show_pathway?hsa04961+hsa:23236+hsa:491+hsa:5332+hsa:6547+hsa:5578+hsa:477+hsa:26052+hsa:480+hsa:5567+hsa:5579+hsa:476+hsa:490
hsa05164	Influenza A	32	1268	160	7681	0.137567	0.452962	0.2	ENSG00000184012(TMPRSS2)|ENSG00000157601(MX1)|ENSG00000183486(MX2)|ENSG00000171855(IFNB1)|ENSG00000198502(HLA-DRB5)|ENSG00000179344(HLA-DQB1)|ENSG00000171608(PIK3CD)|ENSG00000196664(TLR7)|ENSG00000154229(PRKCA)|ENSG00000121858(TNFSF10)|ENSG00000145675(PIK3R1)|ENSG00000213928(IRF9)|ENSG00000113302(IL12B)|ENSG00000105221(AKT2)|ENSG00000125538(IL1B)|ENSG00000107201(DDX58)|ENSG00000232810(TNF)|ENSG00…	hsa:7113|hsa:4599|hsa:4600|hsa:3456|hsa:3127|hsa:3119|hsa:5293|hsa:51284|hsa:5578|hsa:8743|hsa:5295|hsa:10379|hsa:3593|hsa:208|hsa:3553|hsa:23586|hsa:7124|hsa:356|hsa:4792|hsa:64499|hsa:7177|hsa:5646|hsa:3442|hsa:5579|hsa:4790|hsa:114548|hsa:896|hsa:4938|hsa:4940|hsa:4939|hsa:6352|hsa:5610	http://www.kegg.jp/kegg-bin/show_pathway?hsa05164+hsa:7113+hsa:4599+hsa:4600+hsa:3456+hsa:3127+hsa:3119+hsa:5293+hsa:51284+hsa:5578+hsa:8743+hsa:5295+hsa:10379+hsa:3593+hsa:208+hsa:3553+hsa:23586+hsa:7124+hsa:356+hsa:4792+hsa:64499+hsa:7177+hsa:5646+hsa:3442+hsa:5579+hsa:4790+hsa:114548+hsa:896+hsa:4938+hsa:4940+hsa:4939+hsa:6352+hsa:5610
hsa04012	ErbB signaling pathway	18	1268	84	7681	0.142124	0.455903	0.214286	ENSG00000058404(CAMK2B)|ENSG00000171608(PIK3CD)|ENSG00000157168(NRG1)|ENSG00000114423(CBLB)|ENSG00000138798(EGF)|ENSG00000124181(PLCG1)|ENSG00000154229(PRKCA)|ENSG00000136997(MYC)|ENSG00000145675(PIK3R1)|ENSG00000169398(PTK2)|ENSG00000105221(AKT2)|ENSG00000071051(NCK2)|ENSG00000157764(BRAF)|ENSG00000109339(MAPK10)|ENSG00000148660(CAMK2G)|ENSG00000175634(RPS6KB2)|ENSG00000166501(PRKCB)|ENSG0000012…	hsa:816|hsa:5293|hsa:3084|hsa:868|hsa:1950|hsa:5335|hsa:5578|hsa:4609|hsa:5295|hsa:5747|hsa:208|hsa:8440|hsa:673|hsa:5602|hsa:818|hsa:6199|hsa:5579|hsa:25759	http://www.kegg.jp/kegg-bin/show_pathway?hsa04012+hsa:816+hsa:5293+hsa:3084+hsa:868+hsa:1950+hsa:5335+hsa:5578+hsa:4609+hsa:5295+hsa:5747+hsa:208+hsa:8440+hsa:673+hsa:5602+hsa:818+hsa:6199+hsa:5579+hsa:25759
hsa04940	Type I diabetes mellitus	10	1268	42	7681	0.142953	0.455903	0.238095	ENSG00000198502(HLA-DRB5)|ENSG00000179344(HLA-DQB1)|ENSG00000180644(PRF1)|ENSG00000113302(IL12B)|ENSG00000125538(IL1B)|ENSG00000226979(LTA)|ENSG00000232810(TNF)|ENSG00000117560(FASLG)|ENSG00000178562(CD28)|ENSG00000054356(PTPRN)	hsa:3127|hsa:3119|hsa:5551|hsa:3593|hsa:3553|hsa:4049|hsa:7124|hsa:356|hsa:940|hsa:5798	http://www.kegg.jp/kegg-bin/show_pathway?hsa04940+hsa:3127+hsa:3119+hsa:5551+hsa:3593+hsa:3553+hsa:4049+hsa:7124+hsa:356+hsa:940+hsa:5798
hsa04964	Proximal tubule bicarbonate reclamation	6	1268	22	7681	0.141803	0.455903	0.272727	ENSG00000167434(CA4)|ENSG00000018625(ATP1A2)|ENSG00000132681(ATP1A4)|ENSG00000080493(SLC4A4)|ENSG00000240583(AQP1)|ENSG00000163399(ATP1A1)	hsa:762|hsa:477|hsa:480|hsa:8671|hsa:358|hsa:476	http://www.kegg.jp/kegg-bin/show_pathway?hsa04964+hsa:762+hsa:477+hsa:480+hsa:8671+hsa:358+hsa:476
hsa04072	Phospholipase D signaling pathway	29	1268	145	7681	0.151508	0.478874	0.2	ENSG00000100055(CYTH4)|ENSG00000182621(PLCB1)|ENSG00000133818(RRAS2)|ENSG00000164742(ADCY1)|ENSG00000171608(PIK3CD)|ENSG00000107242(PIP5K1B)|ENSG00000101333(PLCB4)|ENSG00000170962(PDGFD)|ENSG00000164082(GRM2)|ENSG00000138798(EGF)|ENSG00000049130(KITLG)|ENSG00000124181(PLCG1)|ENSG00000154229(PRKCA)|ENSG00000149534(MS4A2)|ENSG00000145675(PIK3R1)|ENSG00000105221(AKT2)|ENSG00000010810(FYN)|ENSG000001…	hsa:27128|hsa:23236|hsa:22800|hsa:107|hsa:5293|hsa:8395|hsa:5332|hsa:80310|hsa:2912|hsa:1950|hsa:4254|hsa:5335|hsa:5578|hsa:2206|hsa:5295|hsa:208|hsa:2534|hsa:3577|hsa:11069|hsa:552|hsa:5159|hsa:26052|hsa:1606|hsa:57121|hsa:2913|hsa:25759|hsa:8527|hsa:183|hsa:2205	http://www.kegg.jp/kegg-bin/show_pathway?hsa04072+hsa:27128+hsa:23236+hsa:22800+hsa:107+hsa:5293+hsa:8395+hsa:5332+hsa:80310+hsa:2912+hsa:1950+hsa:4254+hsa:5335+hsa:5578+hsa:2206+hsa:5295+hsa:208+hsa:2534+hsa:3577+hsa:11069+hsa:552+hsa:5159+hsa:26052+hsa:1606+hsa:57121+hsa:2913+hsa:25759+hsa:8527+hsa:183+hsa:2205
hsa04924	Renin secretion	15	1268	69	7681	0.15532	0.480146	0.217391	ENSG00000182621(PLCB1)|ENSG00000078401(EDN1)|ENSG00000096433(ITPR3)|ENSG00000152270(PDE3B)|ENSG00000101333(PLCB4)|ENSG00000043591(ADRB1)|ENSG00000127955(GNAI1)|ENSG00000164116(GUCY1A1)|ENSG00000061918(GUCY1B1)|ENSG00000172572(PDE3A)|ENSG00000240583(AQP1)|ENSG00000142875(PRKACB)|ENSG00000138669(PRKG2)|ENSG00000151067(CACNA1C)|ENSG00000135744(AGT)	hsa:23236|hsa:1906|hsa:3710|hsa:5140|hsa:5332|hsa:153|hsa:2770|hsa:2982|hsa:2983|hsa:5139|hsa:358|hsa:5567|hsa:5593|hsa:775|hsa:183	http://www.kegg.jp/kegg-bin/show_pathway?hsa04924+hsa:23236+hsa:1906+hsa:3710+hsa:5140+hsa:5332+hsa:153+hsa:2770+hsa:2982+hsa:2983+hsa:5139+hsa:358+hsa:5567+hsa:5593+hsa:775+hsa:183
hsa05231	Choline metabolism in cancer	20	1268	96	7681	0.15598	0.480146	0.208333	ENSG00000132970(WASF3)|ENSG00000171608(PIK3CD)|ENSG00000107242(PIP5K1B)|ENSG00000170962(PDGFD)|ENSG00000138798(EGF)|ENSG00000102230(PCYT1B)|ENSG00000124181(PLCG1)|ENSG00000154229(PRKCA)|ENSG00000145675(PIK3R1)|ENSG00000112290(WASF1)|ENSG00000105221(AKT2)|ENSG00000113721(PDGFRB)|ENSG00000109339(MAPK10)|ENSG00000065357(DGKA)|ENSG00000175634(RPS6KB2)|ENSG00000100644(HIF1A)|ENSG00000129353(SLC44A2)|E…	hsa:10810|hsa:5293|hsa:8395|hsa:80310|hsa:1950|hsa:9468|hsa:5335|hsa:5578|hsa:5295|hsa:8936|hsa:208|hsa:5159|hsa:5602|hsa:1606|hsa:6199|hsa:3091|hsa:57153|hsa:80736|hsa:5579|hsa:8527	http://www.kegg.jp/kegg-bin/show_pathway?hsa05231+hsa:10810+hsa:5293+hsa:8395+hsa:80310+hsa:1950+hsa:9468+hsa:5335+hsa:5578+hsa:5295+hsa:8936+hsa:208+hsa:5159+hsa:5602+hsa:1606+hsa:6199+hsa:3091+hsa:57153+hsa:80736+hsa:5579+hsa:8527
hsa05417	Lipid and atherosclerosis	40	1268	207	7681	0.155919	0.480146	0.193237	ENSG00000182621(PLCB1)|ENSG00000171855(IFNB1)|ENSG00000171791(BCL2)|ENSG00000102245(CD40LG)|ENSG00000058404(CAMK2B)|ENSG00000277632(CCL3)|ENSG00000171608(PIK3CD)|ENSG00000185386(MAPK11)|ENSG00000276085(CCL3L1)|ENSG00000276085(CCL3L1)|ENSG00000101333(PLCB4)|ENSG00000134716(CYP2J2)|ENSG00000124181(PLCG1)|ENSG00000154229(PRKCA)|ENSG00000121858(TNFSF10)|ENSG00000145675(PIK3R1)|ENSG00000134215(VAV3)|E…	hsa:23236|hsa:3456|hsa:596|hsa:959|hsa:816|hsa:6348|hsa:5293|hsa:5600|hsa:6349|hsa:414062|hsa:5332|hsa:1573|hsa:5335|hsa:5578|hsa:8743|hsa:5295|hsa:10451|hsa:5606|hsa:3593|hsa:5747|hsa:208|hsa:3553|hsa:4775|hsa:7124|hsa:356|hsa:5451|hsa:4792|hsa:1559|hsa:1558|hsa:5602|hsa:818|hsa:6401|hsa:3442|hsa:5452|hsa:6403|hsa:177|hsa:4790|hsa:114548|hsa:335|hsa:6352	http://www.kegg.jp/kegg-bin/show_pathway?hsa05417+hsa:23236+hsa:3456+hsa:596+hsa:959+hsa:816+hsa:6348+hsa:5293+hsa:5600+hsa:6349+hsa:414062+hsa:5332+hsa:1573+hsa:5335+hsa:5578+hsa:8743+hsa:5295+hsa:10451+hsa:5606+hsa:3593+hsa:5747+hsa:208+hsa:3553+hsa:4775+hsa:7124+hsa:356+hsa:5451+hsa:4792+hsa:1559+hsa:1558+hsa:5602+hsa:818+hsa:6401+hsa:3442+hsa:5452+hsa:6403+hsa:177+hsa:4790+hsa:114548+hsa:335+…
hsa04520	Adherens junction	19	1268	91	7681	0.161118	0.491689	0.208791	ENSG00000132970(WASF3)|ENSG00000176105(YES1)|ENSG00000136153(LMO7)|ENSG00000149177(PTPRJ)|ENSG00000101335(MYL9)|ENSG00000148498(PARD3)|ENSG00000163513(TGFBR2)|ENSG00000035403(VCL)|ENSG00000081059(TCF7)|ENSG00000112290(WASF1)|ENSG00000140443(IGF1R)|ENSG00000010810(FYN)|ENSG00000166949(SMAD3)|ENSG00000077782(FGFR1)|ENSG00000039068(CDH1)|ENSG00000138795(LEF1)|ENSG00000105538(RASIP1)|ENSG00000127329(…	hsa:10810|hsa:7525|hsa:4008|hsa:5795|hsa:10398|hsa:56288|hsa:7048|hsa:7414|hsa:6932|hsa:8936|hsa:3480|hsa:2534|hsa:4088|hsa:2260|hsa:999|hsa:51176|hsa:54922|hsa:5787|hsa:117178	http://www.kegg.jp/kegg-bin/show_pathway?hsa04520+hsa:10810+hsa:7525+hsa:4008+hsa:5795+hsa:10398+hsa:56288+hsa:7048+hsa:7414+hsa:6932+hsa:8936+hsa:3480+hsa:2534+hsa:4088+hsa:2260+hsa:999+hsa:51176+hsa:54922+hsa:5787+hsa:117178
hsa00590	Arachidonic acid metabolism	13	1268	59	7681	0.164601	0.498024	0.220339	ENSG00000124212(PTGIS)|ENSG00000120915(EPHX2)|ENSG00000095303(PTGS1)|ENSG00000186529(CYP4F3)|ENSG00000134716(CYP2J2)|ENSG00000163803(PLB1)|ENSG00000107317(PTGDS)|ENSG00000164120(HPGD)|ENSG00000138109(CYP2C9)|ENSG00000138115(CYP2C8)|ENSG00000133328(PLAAT2)|ENSG00000108839(ALOX12)|ENSG00000073756(PTGS2)	hsa:5740|hsa:2053|hsa:5742|hsa:4051|hsa:1573|hsa:151056|hsa:5730|hsa:3248|hsa:1559|hsa:1558|hsa:54979|hsa:239|hsa:5743	http://www.kegg.jp/kegg-bin/show_pathway?hsa00590+hsa:5740+hsa:2053+hsa:5742+hsa:4051+hsa:1573+hsa:151056+hsa:5730+hsa:3248+hsa:1559+hsa:1558+hsa:54979+hsa:239+hsa:5743
hsa03430	Mismatch repair	6	1268	23	7681	0.166613	0.499838	0.26087	ENSG00000204086(RPA4)|ENSG00000095002(MSH2)|ENSG00000119684(MLH3)|ENSG00000132383(RPA1)|ENSG00000116062(MSH6)|ENSG00000174371(EXO1)	hsa:29935|hsa:4436|hsa:27030|hsa:6117|hsa:2956|hsa:9156	http://www.kegg.jp/kegg-bin/show_pathway?hsa03430+hsa:29935+hsa:4436+hsa:27030+hsa:6117+hsa:2956+hsa:9156
hsa04934	Cushing syndrome	29	1268	148	7681	0.180329	0.536442	0.195946	ENSG00000100346(CACNA1I)|ENSG00000182621(PLCB1)|ENSG00000154764(WNT7A)|ENSG00000164742(ADCY1)|ENSG00000058404(CAMK2B)|ENSG00000096433(ITPR3)|ENSG00000101412(E2F1)|ENSG00000101333(PLCB4)|ENSG00000108379(WNT3)|ENSG00000140459(CYP11A1)|ENSG00000075290(WNT8B)|ENSG00000127955(GNAI1)|ENSG00000105173(CCNE1)|ENSG00000118058(KMT2A)|ENSG00000081059(TCF7)|ENSG00000002745(WNT16)|ENSG00000157764(BRAF)|ENSG000…	hsa:8911|hsa:23236|hsa:7476|hsa:107|hsa:816|hsa:3710|hsa:1869|hsa:5332|hsa:7473|hsa:1583|hsa:7479|hsa:2770|hsa:898|hsa:4297|hsa:6932|hsa:51384|hsa:673|hsa:8313|hsa:7480|hsa:7471|hsa:818|hsa:51176|hsa:1388|hsa:5567|hsa:1870|hsa:5087|hsa:775|hsa:183|hsa:54361	http://www.kegg.jp/kegg-bin/show_pathway?hsa04934+hsa:8911+hsa:23236+hsa:7476+hsa:107+hsa:816+hsa:3710+hsa:1869+hsa:5332+hsa:7473+hsa:1583+hsa:7479+hsa:2770+hsa:898+hsa:4297+hsa:6932+hsa:51384+hsa:673+hsa:8313+hsa:7480+hsa:7471+hsa:818+hsa:51176+hsa:1388+hsa:5567+hsa:1870+hsa:5087+hsa:775+hsa:183+hsa:54361
hsa00240	Pyrimidine metabolism	12	1268	55	7681	0.186089	0.548962	0.218182	ENSG00000100024(UPB1)|ENSG00000168032(ENTPD3)|ENSG00000185013(NT5C1B)|ENSG00000171793(CTPS1)|ENSG00000154269(ENPP3)|ENSG00000205309(NT5M)|ENSG00000122643(NT5C3A)|ENSG00000197594(ENPP1)|ENSG00000167900(TK1)|ENSG00000135318(NT5E)|ENSG00000171848(RRM2)|ENSG00000116981(NT5C1A)	hsa:51733|hsa:956|hsa:93034|hsa:1503|hsa:5169|hsa:56953|hsa:51251|hsa:5167|hsa:7083|hsa:4907|hsa:6241|hsa:84618	http://www.kegg.jp/kegg-bin/show_pathway?hsa00240+hsa:51733+hsa:956+hsa:93034+hsa:1503+hsa:5169+hsa:56953+hsa:51251+hsa:5167+hsa:7083+hsa:4907+hsa:6241+hsa:84618
hsa05320	Autoimmune thyroid disease	10	1268	45	7681	0.198012	0.579308	0.222222	ENSG00000102245(CD40LG)|ENSG00000198502(HLA-DRB5)|ENSG00000179344(HLA-DQB1)|ENSG00000180644(PRF1)|ENSG00000115705(TPO)|ENSG00000042832(TG)|ENSG00000117560(FASLG)|ENSG00000163599(CTLA4)|ENSG00000147873(IFNA5)|ENSG00000178562(CD28)	hsa:959|hsa:3127|hsa:3119|hsa:5551|hsa:7173|hsa:7038|hsa:356|hsa:1493|hsa:3442|hsa:940	http://www.kegg.jp/kegg-bin/show_pathway?hsa05320+hsa:959+hsa:3127+hsa:3119+hsa:5551+hsa:7173+hsa:7038+hsa:356+hsa:1493+hsa:3442+hsa:940
hsa04728	Dopaminergic synapse	25	1268	128	7681	0.206629	0.59379	0.195312	ENSG00000182621(PLCB1)|ENSG00000186469(GNG2)|ENSG00000058404(CAMK2B)|ENSG00000096433(ITPR3)|ENSG00000141404(GNAL)|ENSG00000185386(MAPK11)|ENSG00000131771(PPP1R1B)|ENSG00000101333(PLCB4)|ENSG00000127920(GNG11)|ENSG00000165646(SLC18A2)|ENSG00000152578(GRIA4)|ENSG00000127955(GNAI1)|ENSG00000154229(PRKCA)|ENSG00000105221(AKT2)|ENSG00000167414(GNG8)|ENSG00000087258(GNAO1)|ENSG00000162728(KCNJ9)|ENSG00…	hsa:23236|hsa:54331|hsa:816|hsa:3710|hsa:2774|hsa:5600|hsa:84152|hsa:5332|hsa:2791|hsa:6571|hsa:2893|hsa:2770|hsa:5578|hsa:208|hsa:94235|hsa:2775|hsa:3765|hsa:5602|hsa:818|hsa:10681|hsa:1388|hsa:773|hsa:5567|hsa:5579|hsa:775	http://www.kegg.jp/kegg-bin/show_pathway?hsa04728+hsa:23236+hsa:54331+hsa:816+hsa:3710+hsa:2774+hsa:5600+hsa:84152+hsa:5332+hsa:2791+hsa:6571+hsa:2893+hsa:2770+hsa:5578+hsa:208+hsa:94235+hsa:2775+hsa:3765+hsa:5602+hsa:818+hsa:10681+hsa:1388+hsa:773+hsa:5567+hsa:5579+hsa:775
hsa05160	Hepatitis C	28	1268	145	7681	0.207994	0.59379	0.193103	ENSG00000134873(CLDN10)|ENSG00000157601(MX1)|ENSG00000183486(MX2)|ENSG00000171855(IFNB1)|ENSG00000171608(PIK3CD)|ENSG00000101412(E2F1)|ENSG00000184113(CLDN5)|ENSG00000138798(EGF)|ENSG00000136997(MYC)|ENSG00000145675(PIK3R1)|ENSG00000213928(IRF9)|ENSG00000105221(AKT2)|ENSG00000157764(BRAF)|ENSG00000171217(CLDN20)|ENSG00000107201(DDX58)|ENSG00000232810(TNF)|ENSG00000117560(FASLG)|ENSG00000185745(IF…	hsa:9071|hsa:4599|hsa:4600|hsa:3456|hsa:5293|hsa:1869|hsa:7122|hsa:1950|hsa:4609|hsa:5295|hsa:10379|hsa:208|hsa:673|hsa:49861|hsa:23586|hsa:7124|hsa:356|hsa:3434|hsa:4792|hsa:5010|hsa:8737|hsa:3442|hsa:4790|hsa:1870|hsa:4938|hsa:4940|hsa:4939|hsa:5610	http://www.kegg.jp/kegg-bin/show_pathway?hsa05160+hsa:9071+hsa:4599+hsa:4600+hsa:3456+hsa:5293+hsa:1869+hsa:7122+hsa:1950+hsa:4609+hsa:5295+hsa:10379+hsa:208+hsa:673+hsa:49861+hsa:23586+hsa:7124+hsa:356+hsa:3434+hsa:4792+hsa:5010+hsa:8737+hsa:3442+hsa:4790+hsa:1870+hsa:4938+hsa:4940+hsa:4939+hsa:5610
hsa05221	Acute myeloid leukemia	14	1268	67	7681	0.206247	0.59379	0.208955	ENSG00000102096(PIM2)|ENSG00000171608(PIK3CD)|ENSG00000173801(JUP)|ENSG00000139318(DUSP6)|ENSG00000081059(TCF7)|ENSG00000136997(MYC)|ENSG00000145675(PIK3R1)|ENSG00000105221(AKT2)|ENSG00000157764(BRAF)|ENSG00000145386(CCNA2)|ENSG00000175634(RPS6KB2)|ENSG00000138795(LEF1)|ENSG00000109320(NFKB1)|ENSG00000109906(ZBTB16)	hsa:11040|hsa:5293|hsa:3728|hsa:1848|hsa:6932|hsa:4609|hsa:5295|hsa:208|hsa:673|hsa:890|hsa:6199|hsa:51176|hsa:4790|hsa:7704	http://www.kegg.jp/kegg-bin/show_pathway?hsa05221+hsa:11040+hsa:5293+hsa:3728+hsa:1848+hsa:6932+hsa:4609+hsa:5295+hsa:208+hsa:673+hsa:890+hsa:6199+hsa:51176+hsa:4790+hsa:7704
hsa04070	Phosphatidylinositol signaling system	19	1268	95	7681	0.213201	0.602453	0.2	ENSG00000182621(PLCB1)|ENSG00000100330(MTMR3)|ENSG00000096433(ITPR3)|ENSG00000171608(PIK3CD)|ENSG00000107242(PIP5K1B)|ENSG00000068383(INPP5A)|ENSG00000101333(PLCB4)|ENSG00000138193(PLCE1)|ENSG00000124181(PLCG1)|ENSG00000154229(PRKCA)|ENSG00000145675(PIK3R1)|ENSG00000109452(INPP4B)|ENSG00000063601(MTMR1)|ENSG00000065357(DGKA)|ENSG00000168918(INPP5D)|ENSG00000166501(PRKCB)|ENSG00000077044(DGKD)|ENS…	hsa:23236|hsa:8897|hsa:3710|hsa:5293|hsa:8395|hsa:3632|hsa:5332|hsa:51196|hsa:5335|hsa:5578|hsa:5295|hsa:8821|hsa:8776|hsa:1606|hsa:3635|hsa:5579|hsa:8527|hsa:5287|hsa:3707	http://www.kegg.jp/kegg-bin/show_pathway?hsa04070+hsa:23236+hsa:8897+hsa:3710+hsa:5293+hsa:8395+hsa:3632+hsa:5332+hsa:51196+hsa:5335+hsa:5578+hsa:5295+hsa:8821+hsa:8776+hsa:1606+hsa:3635+hsa:5579+hsa:8527+hsa:5287+hsa:3707
hsa04662	B cell receptor signaling pathway	17	1268	84	7681	0.214432	0.602453	0.202381	ENSG00000171608(PIK3CD)|ENSG00000239961(LILRA4)|ENSG00000105369(CD79A)|ENSG00000153064(BANK1)|ENSG00000145675(PIK3R1)|ENSG00000134215(VAV3)|ENSG00000012124(CD22)|ENSG00000105221(AKT2)|ENSG00000072736(NFATC3)|ENSG00000100906(NFKBIA)|ENSG00000198286(CARD11)|ENSG00000136573(BLK)|ENSG00000168918(INPP5D)|ENSG00000166501(PRKCB)|ENSG00000109320(NFKB1)|ENSG00000185885(IFITM1)|ENSG00000131042(LILRB2)	hsa:5293|hsa:23547|hsa:973|hsa:55024|hsa:5295|hsa:10451|hsa:933|hsa:208|hsa:4775|hsa:4792|hsa:84433|hsa:640|hsa:3635|hsa:5579|hsa:4790|hsa:8519|hsa:10288	http://www.kegg.jp/kegg-bin/show_pathway?hsa04662+hsa:5293+hsa:23547+hsa:973+hsa:55024+hsa:5295+hsa:10451+hsa:933+hsa:208+hsa:4775+hsa:4792+hsa:84433+hsa:640+hsa:3635+hsa:5579+hsa:4790+hsa:8519+hsa:10288
hsa00230	Purine metabolism	24	1268	124	7681	0.226356	0.630946	0.193548	ENSG00000160191(PDE9A)|ENSG00000164742(ADCY1)|ENSG00000070019(GUCY2C)|ENSG00000168032(ENTPD3)|ENSG00000152270(PDE3B)|ENSG00000113448(PDE4D)|ENSG00000185013(NT5C1B)|ENSG00000186642(PDE2A)|ENSG00000184588(PDE4B)|ENSG00000154027(AK5)|ENSG00000138735(PDE5A)|ENSG00000171408(PDE7B)|ENSG00000154269(ENPP3)|ENSG00000159899(NPR2)|ENSG00000205268(PDE7A)|ENSG00000205309(NT5M)|ENSG00000164116(GUCY1A1)|ENSG000…	hsa:5152|hsa:107|hsa:2984|hsa:956|hsa:5140|hsa:5144|hsa:93034|hsa:5138|hsa:5142|hsa:26289|hsa:8654|hsa:27115|hsa:5169|hsa:4882|hsa:5150|hsa:56953|hsa:2982|hsa:2983|hsa:5139|hsa:10846|hsa:5167|hsa:4907|hsa:6241|hsa:84618	http://www.kegg.jp/kegg-bin/show_pathway?hsa00230+hsa:5152+hsa:107+hsa:2984+hsa:956+hsa:5140+hsa:5144+hsa:93034+hsa:5138+hsa:5142+hsa:26289+hsa:8654+hsa:27115+hsa:5169+hsa:4882+hsa:5150+hsa:56953+hsa:2982+hsa:2983+hsa:5139+hsa:10846+hsa:5167+hsa:4907+hsa:6241+hsa:84618
hsa04530	Tight junction	31	1268	164	7681	0.229891	0.635792	0.189024	ENSG00000178462(TUBAL3)|ENSG00000134873(CLDN10)|ENSG00000178184(PARD6G)|ENSG00000131899(LLGL1)|ENSG00000101335(MYL9)|ENSG00000166025(AMOTL1)|ENSG00000148498(PARD3)|ENSG00000184113(CLDN5)|ENSG00000166086(JAM3)|ENSG00000133627(ACTR3B)|ENSG00000119139(TJP2)|ENSG00000109756(RAPGEF2)|ENSG00000171217(CLDN20)|ENSG00000092820(EZR)|ENSG00000013297(CLDN11)|ENSG00000109339(MAPK10)|ENSG00000095203(EPB41L4B)|…	hsa:79861|hsa:9071|hsa:84552|hsa:3996|hsa:10398|hsa:154810|hsa:56288|hsa:7122|hsa:83700|hsa:57180|hsa:9414|hsa:9693|hsa:49861|hsa:7430|hsa:5010|hsa:5602|hsa:54566|hsa:4629|hsa:51735|hsa:123720|hsa:4628|hsa:4734|hsa:5567|hsa:1740|hsa:23370|hsa:112714|hsa:909|hsa:911|hsa:910|hsa:913|hsa:7277	http://www.kegg.jp/kegg-bin/show_pathway?hsa04530+hsa:79861+hsa:9071+hsa:84552+hsa:3996+hsa:10398+hsa:154810+hsa:56288+hsa:7122+hsa:83700+hsa:57180+hsa:9414+hsa:9693+hsa:49861+hsa:7430+hsa:5010+hsa:5602+hsa:54566+hsa:4629+hsa:51735+hsa:123720+hsa:4628+hsa:4734+hsa:5567+hsa:1740+hsa:23370+hsa:112714+hsa:909+hsa:911+hsa:910+hsa:913+hsa:7277
hsa04960	Aldosterone-regulated sodium reabsorption	8	1268	36	7681	0.233837	0.641693	0.222222	ENSG00000171608(PIK3CD)|ENSG00000154229(PRKCA)|ENSG00000145675(PIK3R1)|ENSG00000151623(NR3C2)|ENSG00000018625(ATP1A2)|ENSG00000132681(ATP1A4)|ENSG00000166501(PRKCB)|ENSG00000163399(ATP1A1)	hsa:5293|hsa:5578|hsa:5295|hsa:4306|hsa:477|hsa:480|hsa:5579|hsa:476	http://www.kegg.jp/kegg-bin/show_pathway?hsa04960+hsa:5293+hsa:5578+hsa:5295+hsa:4306+hsa:477+hsa:480+hsa:5579+hsa:476
hsa04066	HIF-1 signaling pathway	21	1268	108	7681	0.238297	0.648844	0.194444	ENSG00000102755(FLT1)|ENSG00000078401(EDN1)|ENSG00000166796(LDHC)|ENSG00000171791(BCL2)|ENSG00000058404(CAMK2B)|ENSG00000171608(PIK3CD)|ENSG00000138798(EGF)|ENSG00000124181(PLCG1)|ENSG00000154229(PRKCA)|ENSG00000145675(PIK3R1)|ENSG00000140443(IGF1R)|ENSG00000105221(AKT2)|ENSG00000156510(HKDC1)|ENSG00000148660(CAMK2G)|ENSG00000154188(ANGPT1)|ENSG00000175634(RPS6KB2)|ENSG00000100644(HIF1A)|ENSG0000…	hsa:2321|hsa:1906|hsa:3948|hsa:596|hsa:816|hsa:5293|hsa:1950|hsa:5335|hsa:5578|hsa:5295|hsa:3480|hsa:208|hsa:80201|hsa:818|hsa:284|hsa:6199|hsa:3091|hsa:5579|hsa:4790|hsa:5163|hsa:7018	http://www.kegg.jp/kegg-bin/show_pathway?hsa04066+hsa:2321+hsa:1906+hsa:3948+hsa:596+hsa:816+hsa:5293+hsa:1950+hsa:5335+hsa:5578+hsa:5295+hsa:3480+hsa:208+hsa:80201+hsa:818+hsa:284+hsa:6199+hsa:3091+hsa:5579+hsa:4790+hsa:5163+hsa:7018
hsa05218	Melanoma	14	1268	69	7681	0.240109	0.648844	0.202899	ENSG00000102678(FGF9)|ENSG00000171608(PIK3CD)|ENSG00000101412(E2F1)|ENSG00000170962(PDGFD)|ENSG00000138798(EGF)|ENSG00000145675(PIK3R1)|ENSG00000140443(IGF1R)|ENSG00000105221(AKT2)|ENSG00000157764(BRAF)|ENSG00000113721(PDGFRB)|ENSG00000099860(GADD45B)|ENSG00000077782(FGFR1)|ENSG00000039068(CDH1)|ENSG00000007968(E2F2)	hsa:2254|hsa:5293|hsa:1869|hsa:80310|hsa:1950|hsa:5295|hsa:3480|hsa:208|hsa:673|hsa:5159|hsa:4616|hsa:2260|hsa:999|hsa:1870	http://www.kegg.jp/kegg-bin/show_pathway?hsa05218+hsa:2254+hsa:5293+hsa:1869+hsa:80310+hsa:1950+hsa:5295+hsa:3480+hsa:208+hsa:673+hsa:5159+hsa:4616+hsa:2260+hsa:999+hsa:1870
hsa03250	Viral life cycle - HIV-1	13	1268	64	7681	0.249739	0.662855	0.203125	ENSG00000164985(PSIP1)|ENSG00000157601(MX1)|ENSG00000183486(MX2)|ENSG00000114166(KAT2B)|ENSG00000128383(APOBEC3A)|ENSG00000128383(APOBEC3A)|ENSG00000129315(CCNT1)|ENSG00000166963(MAP1A)|ENSG00000149557(FEZ1)|ENSG00000171843(MLLT3)|ENSG00000131711(MAP1B)|ENSG00000124789(NUP153)|ENSG00000213246(SUPT4H1)	hsa:11168|hsa:4599|hsa:4600|hsa:8850|hsa:200315|hsa:100913187|hsa:904|hsa:4130|hsa:9638|hsa:4300|hsa:4131|hsa:9972|hsa:6827	http://www.kegg.jp/kegg-bin/show_pathway?hsa03250+hsa:11168+hsa:4599+hsa:4600+hsa:8850+hsa:200315+hsa:100913187+hsa:904+hsa:4130+hsa:9638+hsa:4300+hsa:4131+hsa:9972+hsa:6827
hsa04723	Retrograde endocannabinoid signaling	27	1268	143	7681	0.250911	0.662855	0.188811	ENSG00000198888(MT-ND1)|ENSG00000198763(MT-ND2)|ENSG00000198840(MT-ND3)|ENSG00000198886(MT-ND4)|ENSG00000198786(MT-ND5)|ENSG00000178127(NDUFV2)|ENSG00000182621(PLCB1)|ENSG00000186469(GNG2)|ENSG00000164742(ADCY1)|ENSG00000096433(ITPR3)|ENSG00000185386(MAPK11)|ENSG00000163288(GABRB1)|ENSG00000101333(PLCB4)|ENSG00000127920(GNG11)|ENSG00000152578(GRIA4)|ENSG00000127955(GNAI1)|ENSG00000154229(PRKCA)|E…	hsa:4535|hsa:4536|hsa:4537|hsa:4538|hsa:4540|hsa:4729|hsa:23236|hsa:54331|hsa:107|hsa:3710|hsa:5600|hsa:2560|hsa:5332|hsa:2791|hsa:2893|hsa:2770|hsa:5578|hsa:94235|hsa:2775|hsa:3765|hsa:5602|hsa:10681|hsa:773|hsa:5567|hsa:5579|hsa:775|hsa:5743	http://www.kegg.jp/kegg-bin/show_pathway?hsa04723+hsa:4535+hsa:4536+hsa:4537+hsa:4538+hsa:4540+hsa:4729+hsa:23236+hsa:54331+hsa:107+hsa:3710+hsa:5600+hsa:2560+hsa:5332+hsa:2791+hsa:2893+hsa:2770+hsa:5578+hsa:94235+hsa:2775+hsa:3765+hsa:5602+hsa:10681+hsa:773+hsa:5567+hsa:5579+hsa:775+hsa:5743
hsa05031	Amphetamine addiction	13	1268	64	7681	0.249739	0.662855	0.203125	ENSG00000058404(CAMK2B)|ENSG00000131771(PPP1R1B)|ENSG00000165646(SLC18A2)|ENSG00000152495(CAMK4)|ENSG00000152578(GRIA4)|ENSG00000154229(PRKCA)|ENSG00000176884(GRIN1)|ENSG00000161509(GRIN2C)|ENSG00000148660(CAMK2G)|ENSG00000213676(ATF6B)|ENSG00000142875(PRKACB)|ENSG00000166501(PRKCB)|ENSG00000151067(CACNA1C)	hsa:816|hsa:84152|hsa:6571|hsa:814|hsa:2893|hsa:5578|hsa:2902|hsa:2905|hsa:818|hsa:1388|hsa:5567|hsa:5579|hsa:775	http://www.kegg.jp/kegg-bin/show_pathway?hsa05031+hsa:816+hsa:84152+hsa:6571+hsa:814+hsa:2893+hsa:5578+hsa:2902+hsa:2905+hsa:818+hsa:1388+hsa:5567+hsa:5579+hsa:775
hsa04613	Neutrophil extracellular trap formation	33	1268	178	7681	0.258099	0.672767	0.185393	ENSG00000182621(PLCB1)|ENSG00000196787(H2AC11)|ENSG00000278828(H3C10)|ENSG00000171608(PIK3CD)|ENSG00000100429(HDAC10)|ENSG00000185386(MAPK11)|ENSG00000196664(TLR7)|ENSG00000101333(PLCB4)|ENSG00000124181(PLCG1)|ENSG00000154229(PRKCA)|ENSG00000145675(PIK3R1)|ENSG00000105221(AKT2)|ENSG00000124635(H2BC11)|ENSG00000276368(H2AC14)|ENSG00000197238(H4C11)|ENSG00000100448(CTSG)|ENSG00000286522(H3C2)|ENSG0…	hsa:23236|hsa:8969|hsa:8357|hsa:5293|hsa:83933|hsa:5600|hsa:51284|hsa:5332|hsa:5335|hsa:5578|hsa:5295|hsa:208|hsa:8970|hsa:8331|hsa:8363|hsa:1511|hsa:8358|hsa:3690|hsa:9734|hsa:6403|hsa:8348|hsa:177|hsa:5579|hsa:4790|hsa:8334|hsa:8343|hsa:8345|hsa:8365|hsa:2215|hsa:3674|hsa:92815|hsa:1378|hsa:8349	http://www.kegg.jp/kegg-bin/show_pathway?hsa04613+hsa:23236+hsa:8969+hsa:8357+hsa:5293+hsa:83933+hsa:5600+hsa:51284+hsa:5332+hsa:5335+hsa:5578+hsa:5295+hsa:208+hsa:8970+hsa:8331+hsa:8363+hsa:1511+hsa:8358+hsa:3690+hsa:9734+hsa:6403+hsa:8348+hsa:177+hsa:5579+hsa:4790+hsa:8334+hsa:8343+hsa:8345+hsa:8365+hsa:2215+hsa:3674+hsa:92815+hsa:1378+hsa:8349
hsa05330	Allograft rejection	8	1268	37	7681	0.258464	0.672767	0.216216	ENSG00000102245(CD40LG)|ENSG00000198502(HLA-DRB5)|ENSG00000179344(HLA-DQB1)|ENSG00000180644(PRF1)|ENSG00000113302(IL12B)|ENSG00000232810(TNF)|ENSG00000117560(FASLG)|ENSG00000178562(CD28)	hsa:959|hsa:3127|hsa:3119|hsa:5551|hsa:3593|hsa:7124|hsa:356|hsa:940	http://www.kegg.jp/kegg-bin/show_pathway?hsa05330+hsa:959+hsa:3127+hsa:3119+hsa:5551+hsa:3593+hsa:7124+hsa:356+hsa:940
hsa04625	C-type lectin receptor signaling pathway	20	1268	104	7681	0.261854	0.676615	0.192308	ENSG00000133818(RRAS2)|ENSG00000179388(EGR3)|ENSG00000096433(ITPR3)|ENSG00000165682(CLEC1B)|ENSG00000171608(PIK3CD)|ENSG00000185386(MAPK11)|ENSG00000114423(CBLB)|ENSG00000145675(PIK3R1)|ENSG00000213928(IRF9)|ENSG00000104856(RELB)|ENSG00000113302(IL12B)|ENSG00000105221(AKT2)|ENSG00000125538(IL1B)|ENSG00000072736(NFATC3)|ENSG00000232810(TNF)|ENSG00000100906(NFKBIA)|ENSG00000109339(MAPK10)|ENSG00000…	hsa:22800|hsa:1960|hsa:3710|hsa:51266|hsa:5293|hsa:5600|hsa:868|hsa:5295|hsa:10379|hsa:5971|hsa:3593|hsa:208|hsa:3553|hsa:4775|hsa:7124|hsa:4792|hsa:5602|hsa:4790|hsa:114548|hsa:5743	http://www.kegg.jp/kegg-bin/show_pathway?hsa04625+hsa:22800+hsa:1960+hsa:3710+hsa:51266+hsa:5293+hsa:5600+hsa:868+hsa:5295+hsa:10379+hsa:5971+hsa:3593+hsa:208+hsa:3553+hsa:4775+hsa:7124+hsa:4792+hsa:5602+hsa:4790+hsa:114548+hsa:5743
hsa04068	FoxO signaling pathway	24	1268	127	7681	0.26532	0.680604	0.188976	ENSG00000101109(STK4)|ENSG00000171608(PIK3CD)|ENSG00000185386(MAPK11)|ENSG00000163513(TGFBR2)|ENSG00000138798(EGF)|ENSG00000156804(FBXO32)|ENSG00000142731(PLK4)|ENSG00000121858(TNFSF10)|ENSG00000145675(PIK3R1)|ENSG00000170989(S1PR1)|ENSG00000140443(IGF1R)|ENSG00000105221(AKT2)|ENSG00000127528(KLF2)|ENSG00000157764(BRAF)|ENSG00000166851(PLK1)|ENSG00000117560(FASLG)|ENSG00000109339(MAPK10)|ENSG0000…	hsa:6789|hsa:5293|hsa:5600|hsa:7048|hsa:1950|hsa:114907|hsa:10733|hsa:8743|hsa:5295|hsa:1901|hsa:3480|hsa:208|hsa:10365|hsa:673|hsa:5347|hsa:356|hsa:5602|hsa:4616|hsa:4088|hsa:7040|hsa:1032|hsa:5934|hsa:472|hsa:10018	http://www.kegg.jp/kegg-bin/show_pathway?hsa04068+hsa:6789+hsa:5293+hsa:5600+hsa:7048+hsa:1950+hsa:114907+hsa:10733+hsa:8743+hsa:5295+hsa:1901+hsa:3480+hsa:208+hsa:10365+hsa:673+hsa:5347+hsa:356+hsa:5602+hsa:4616+hsa:4088+hsa:7040+hsa:1032+hsa:5934+hsa:472+hsa:10018
hsa00591	Linoleic acid metabolism	6	1268	27	7681	0.280334	0.693972	0.222222	ENSG00000140505(CYP1A2)|ENSG00000134716(CYP2J2)|ENSG00000163803(PLB1)|ENSG00000138109(CYP2C9)|ENSG00000138115(CYP2C8)|ENSG00000133328(PLAAT2)	hsa:1544|hsa:1573|hsa:151056|hsa:1559|hsa:1558|hsa:54979	http://www.kegg.jp/kegg-bin/show_pathway?hsa00591+hsa:1544+hsa:1573+hsa:151056+hsa:1559+hsa:1558+hsa:54979
hsa01524	Platinum drug resistance	14	1268	71	7681	0.275975	0.693972	0.197183	ENSG00000171791(BCL2)|ENSG00000171608(PIK3CD)|ENSG00000095002(MSH2)|ENSG00000145675(PIK3R1)|ENSG00000134201(GSTM5)|ENSG00000213366(GSTM2)|ENSG00000105221(AKT2)|ENSG00000134184(GSTM1)|ENSG00000131747(TOP2A)|ENSG00000243955(GSTA1)|ENSG00000117560(FASLG)|ENSG00000116062(MSH6)|ENSG00000089685(BIRC5)|ENSG00000149311(ATM)	hsa:596|hsa:5293|hsa:4436|hsa:5295|hsa:2949|hsa:2946|hsa:208|hsa:2944|hsa:7153|hsa:2938|hsa:356|hsa:2956|hsa:332|hsa:472	http://www.kegg.jp/kegg-bin/show_pathway?hsa01524+hsa:596+hsa:5293+hsa:4436+hsa:5295+hsa:2949+hsa:2946+hsa:208+hsa:2944+hsa:7153+hsa:2938+hsa:356+hsa:2956+hsa:332+hsa:472
hsa04390	Hippo signaling pathway	28	1268	151	7681	0.279138	0.693972	0.18543	ENSG00000125845(BMP2)|ENSG00000154764(WNT7A)|ENSG00000178184(PARD6G)|ENSG00000151208(DLG5)|ENSG00000131899(LLGL1)|ENSG00000148204(CRB2)|ENSG00000143869(GDF7)|ENSG00000108379(WNT3)|ENSG00000075290(WNT8B)|ENSG00000148498(PARD3)|ENSG00000163513(TGFBR2)|ENSG00000081059(TCF7)|ENSG00000169435(RASSF6)|ENSG00000136997(MYC)|ENSG00000002745(WNT16)|ENSG00000168646(AXIN2)|ENSG00000169884(WNT10B)|ENSG00000125…	hsa:650|hsa:7476|hsa:84552|hsa:9231|hsa:3996|hsa:286204|hsa:151449|hsa:7473|hsa:7479|hsa:56288|hsa:7048|hsa:6932|hsa:166824|hsa:4609|hsa:51384|hsa:8313|hsa:7480|hsa:7471|hsa:4088|hsa:23286|hsa:7040|hsa:999|hsa:51176|hsa:1740|hsa:896|hsa:332|hsa:23418|hsa:54361	http://www.kegg.jp/kegg-bin/show_pathway?hsa04390+hsa:650+hsa:7476+hsa:84552+hsa:9231+hsa:3996+hsa:286204+hsa:151449+hsa:7473+hsa:7479+hsa:56288+hsa:7048+hsa:6932+hsa:166824+hsa:4609+hsa:51384+hsa:8313+hsa:7480+hsa:7471+hsa:4088+hsa:23286+hsa:7040+hsa:999+hsa:51176+hsa:1740+hsa:896+hsa:332+hsa:23418+hsa:54361
hsa04978	Mineral absorption	12	1268	60	7681	0.279938	0.693972	0.2	ENSG00000157087(ATP2B2)|ENSG00000119121(TRPM6)|ENSG00000164647(STEAP1)|ENSG00000157214(STEAP2)|ENSG00000100678(SLC8A3)|ENSG00000091138(SLC26A3)|ENSG00000018625(ATP1A2)|ENSG00000132681(ATP1A4)|ENSG00000163399(ATP1A1)|ENSG00000070961(ATP2B1)|ENSG00000091513(TF)|ENSG00000138449(SLC40A1)	hsa:491|hsa:140803|hsa:26872|hsa:261729|hsa:6547|hsa:1811|hsa:477|hsa:480|hsa:476|hsa:490|hsa:7018|hsa:30061	http://www.kegg.jp/kegg-bin/show_pathway?hsa04978+hsa:491+hsa:140803+hsa:26872+hsa:261729+hsa:6547+hsa:1811+hsa:477+hsa:480+hsa:476+hsa:490+hsa:7018+hsa:30061
hsa05034	Alcoholism	32	1268	174	7681	0.278285	0.693972	0.183908	ENSG00000186469(GNG2)|ENSG00000128271(ADORA2A)|ENSG00000196787(H2AC11)|ENSG00000278828(H3C10)|ENSG00000100429(HDAC10)|ENSG00000131771(PPP1R1B)|ENSG00000127920(GNG11)|ENSG00000165646(SLC18A2)|ENSG00000152495(CAMK4)|ENSG00000127955(GNAI1)|ENSG00000176884(GRIN1)|ENSG00000161509(GRIN2C)|ENSG00000110931(CAMKK2)|ENSG00000167414(GNG8)|ENSG00000124635(H2BC11)|ENSG00000276368(H2AC14)|ENSG00000197238(H4C11…	hsa:54331|hsa:135|hsa:8969|hsa:8357|hsa:83933|hsa:84152|hsa:2791|hsa:6571|hsa:814|hsa:2770|hsa:2902|hsa:2905|hsa:10645|hsa:94235|hsa:8970|hsa:8331|hsa:8363|hsa:2775|hsa:673|hsa:8358|hsa:10681|hsa:9734|hsa:8348|hsa:1388|hsa:5567|hsa:8334|hsa:8343|hsa:8345|hsa:8365|hsa:25759|hsa:92815|hsa:8349	http://www.kegg.jp/kegg-bin/show_pathway?hsa05034+hsa:54331+hsa:135+hsa:8969+hsa:8357+hsa:83933+hsa:84152+hsa:2791+hsa:6571+hsa:814+hsa:2770+hsa:2902+hsa:2905+hsa:10645+hsa:94235+hsa:8970+hsa:8331+hsa:8363+hsa:2775+hsa:673+hsa:8358+hsa:10681+hsa:9734+hsa:8348+hsa:1388+hsa:5567+hsa:8334+hsa:8343+hsa:8345+hsa:8365+hsa:25759+hsa:92815+hsa:8349
hsa04371	Apelin signaling pathway	25	1268	134	7681	0.282421	0.694284	0.186567	ENSG00000182621(PLCB1)|ENSG00000186469(GNG2)|ENSG00000133818(RRAS2)|ENSG00000164742(ADCY1)|ENSG00000096433(ITPR3)|ENSG00000152270(PDE3B)|ENSG00000101333(PLCB4)|ENSG00000127920(GNG11)|ENSG00000152495(CAMK4)|ENSG00000198336(MYL4)|ENSG00000127955(GNAI1)|ENSG00000100678(SLC8A3)|ENSG00000105221(AKT2)|ENSG00000167414(GNG8)|ENSG00000127528(KLF2)|ENSG00000198838(RYR3)|ENSG00000166819(PLIN1)|ENSG000000811…	hsa:23236|hsa:54331|hsa:22800|hsa:107|hsa:3710|hsa:5140|hsa:5332|hsa:2791|hsa:814|hsa:4635|hsa:2770|hsa:6547|hsa:208|hsa:94235|hsa:10365|hsa:6263|hsa:5346|hsa:4208|hsa:4638|hsa:6199|hsa:10681|hsa:4088|hsa:999|hsa:6262|hsa:5567	http://www.kegg.jp/kegg-bin/show_pathway?hsa04371+hsa:23236+hsa:54331+hsa:22800+hsa:107+hsa:3710+hsa:5140+hsa:5332+hsa:2791+hsa:814+hsa:4635+hsa:2770+hsa:6547+hsa:208+hsa:94235+hsa:10365+hsa:6263+hsa:5346+hsa:4208+hsa:4638+hsa:6199+hsa:10681+hsa:4088+hsa:999+hsa:6262+hsa:5567
hsa00515	Mannose type O-glycan biosynthesis	5	1268	22	7681	0.292252	0.707403	0.227273	ENSG00000133424(LARGE1)|ENSG00000181027(FKRP)|ENSG00000109956(B3GAT1)|ENSG00000214960(CRPPA)|ENSG00000165905(LARGE2)	hsa:9215|hsa:79147|hsa:27087|hsa:729920|hsa:120071	http://www.kegg.jp/kegg-bin/show_pathway?hsa00515+hsa:9215+hsa:79147+hsa:27087+hsa:729920+hsa:120071
hsa00562	Inositol phosphate metabolism	14	1268	72	7681	0.294543	0.707403	0.194444	ENSG00000182621(PLCB1)|ENSG00000100330(MTMR3)|ENSG00000171608(PIK3CD)|ENSG00000107242(PIP5K1B)|ENSG00000068383(INPP5A)|ENSG00000101333(PLCB4)|ENSG00000138193(PLCE1)|ENSG00000124181(PLCG1)|ENSG00000109452(INPP4B)|ENSG00000063601(MTMR1)|ENSG00000114805(PLCH1)|ENSG00000168918(INPP5D)|ENSG00000133056(PIK3C2B)|ENSG00000143772(ITPKB)	hsa:23236|hsa:8897|hsa:5293|hsa:8395|hsa:3632|hsa:5332|hsa:51196|hsa:5335|hsa:8821|hsa:8776|hsa:23007|hsa:3635|hsa:5287|hsa:3707	http://www.kegg.jp/kegg-bin/show_pathway?hsa00562+hsa:23236+hsa:8897+hsa:5293+hsa:8395+hsa:3632+hsa:5332+hsa:51196+hsa:5335+hsa:8821+hsa:8776+hsa:23007+hsa:3635+hsa:5287+hsa:3707
hsa02010	ABC transporters	9	1268	44	7681	0.29575	0.707403	0.204545	ENSG00000164825(DEFB1)|ENSG00000154258(ABCA9)|ENSG00000173208(ABCD2)|ENSG00000154262(ABCA6)|ENSG00000144452(ABCA12)|ENSG00000005471(ABCB4)|ENSG00000085563(ABCB1)|ENSG00000006071(ABCC8)|ENSG00000143921(ABCG8)	hsa:1672|hsa:10350|hsa:225|hsa:23460|hsa:26154|hsa:5244|hsa:5243|hsa:6833|hsa:64241	http://www.kegg.jp/kegg-bin/show_pathway?hsa02010+hsa:1672+hsa:10350+hsa:225+hsa:23460+hsa:26154+hsa:5244+hsa:5243+hsa:6833+hsa:64241
hsa04930	Type II diabetes mellitus	9	1268	44	7681	0.29575	0.707403	0.204545	ENSG00000171608(PIK3CD)|ENSG00000145675(PIK3R1)|ENSG00000156510(HKDC1)|ENSG00000232810(TNF)|ENSG00000109339(MAPK10)|ENSG00000141837(CACNA1A)|ENSG00000198216(CACNA1E)|ENSG00000006071(ABCC8)|ENSG00000151067(CACNA1C)	hsa:5293|hsa:5295|hsa:80201|hsa:7124|hsa:5602|hsa:773|hsa:777|hsa:6833|hsa:775	http://www.kegg.jp/kegg-bin/show_pathway?hsa04930+hsa:5293+hsa:5295+hsa:80201+hsa:7124+hsa:5602+hsa:773+hsa:777+hsa:6833+hsa:775
hsa03271	Virion - Rotavirus	1	1268	2	7681	0.302931	0.719715	0.5	ENSG00000164171(ITGA2)	hsa:3673	http://www.kegg.jp/kegg-bin/show_pathway?hsa03271+hsa:3673
hsa04666	Fc gamma R-mediated phagocytosis	18	1268	96	7681	0.315407	0.73943	0.1875	ENSG00000132970(WASF3)|ENSG00000078053(AMPH)|ENSG00000171608(PIK3CD)|ENSG00000107242(PIP5K1B)|ENSG00000124181(PLCG1)|ENSG00000154229(PRKCA)|ENSG00000165410(CFL2)|ENSG00000133627(ACTR3B)|ENSG00000145675(PIK3R1)|ENSG00000134215(VAV3)|ENSG00000112290(WASF1)|ENSG00000213658(LAT)|ENSG00000105221(AKT2)|ENSG00000175634(RPS6KB2)|ENSG00000168918(INPP5D)|ENSG00000081237(PTPRC)|ENSG00000166501(PRKCB)|ENSG00…	hsa:10810|hsa:273|hsa:5293|hsa:8395|hsa:5335|hsa:5578|hsa:1073|hsa:57180|hsa:5295|hsa:10451|hsa:8936|hsa:27040|hsa:208|hsa:6199|hsa:3635|hsa:5788|hsa:5579|hsa:2215	http://www.kegg.jp/kegg-bin/show_pathway?hsa04666+hsa:10810+hsa:273+hsa:5293+hsa:8395+hsa:5335+hsa:5578+hsa:1073+hsa:57180+hsa:5295+hsa:10451+hsa:8936+hsa:27040+hsa:208+hsa:6199+hsa:3635+hsa:5788+hsa:5579+hsa:2215
hsa05204	Chemical carcinogenesis - DNA adducts	11	1268	56	7681	0.313939	0.73943	0.196429	ENSG00000140505(CYP1A2)|ENSG00000135226(UGT2B28)|ENSG00000134201(GSTM5)|ENSG00000213366(GSTM2)|ENSG00000134184(GSTM1)|ENSG00000243955(GSTA1)|ENSG00000138109(CYP2C9)|ENSG00000138115(CYP2C8)|ENSG00000196502(SULT1A1)|ENSG00000197888(UGT2B17)|ENSG00000073756(PTGS2)	hsa:1544|hsa:54490|hsa:2949|hsa:2946|hsa:2944|hsa:2938|hsa:1559|hsa:1558|hsa:6817|hsa:7367|hsa:5743	http://www.kegg.jp/kegg-bin/show_pathway?hsa05204+hsa:1544+hsa:54490+hsa:2949+hsa:2946+hsa:2944+hsa:2938+hsa:1559+hsa:1558+hsa:6817+hsa:7367+hsa:5743
hsa04614	Renin-angiotensin system	5	1268	23	7681	0.327152	0.75694	0.217391	ENSG00000113441(LNPEP)|ENSG00000100448(CTSG)|ENSG00000163751(CPA3)|ENSG00000130368(MAS1)|ENSG00000135744(AGT)	hsa:4012|hsa:1511|hsa:1359|hsa:4142|hsa:183	http://www.kegg.jp/kegg-bin/show_pathway?hsa04614+hsa:4012+hsa:1511+hsa:1359+hsa:4142+hsa:183
hsa04977	Vitamin digestion and absorption	5	1268	23	7681	0.327152	0.75694	0.217391	ENSG00000107611(CUBN)|ENSG00000166126(AMN)|ENSG00000163803(PLB1)|ENSG00000170482(SLC23A1)|ENSG00000118137(APOA1)	hsa:8029|hsa:81693|hsa:151056|hsa:9963|hsa:335	http://www.kegg.jp/kegg-bin/show_pathway?hsa04977+hsa:8029+hsa:81693+hsa:151056+hsa:9963+hsa:335
hsa00514	Other types of O-glycan biosynthesis	9	1268	46	7681	0.345003	0.787942	0.195652	ENSG00000106003(LFNG)|ENSG00000110328(GALNT18)|ENSG00000100626(GALNT16)|ENSG00000158089(GALNT14)|ENSG00000144057(ST6GAL2)|ENSG00000182870(GALNT9)|ENSG00000136542(GALNT5)|ENSG00000073849(ST6GAL1)|ENSG00000115339(GALNT3)	hsa:3955|hsa:374378|hsa:57452|hsa:79623|hsa:84620|hsa:50614|hsa:11227|hsa:6480|hsa:2591	http://www.kegg.jp/kegg-bin/show_pathway?hsa00514+hsa:3955+hsa:374378+hsa:57452+hsa:79623+hsa:84620+hsa:50614+hsa:11227+hsa:6480+hsa:2591
hsa04218	Cellular senescence	28	1268	156	7681	0.344421	0.787942	0.179487	ENSG00000133818(RRAS2)|ENSG00000080839(RBL1)|ENSG00000101057(MYBL2)|ENSG00000096433(ITPR3)|ENSG00000171608(PIK3CD)|ENSG00000185386(MAPK11)|ENSG00000101412(E2F1)|ENSG00000133740(E2F5)|ENSG00000163513(TGFBR2)|ENSG00000105173(CCNE1)|ENSG00000134954(ETS1)|ENSG00000136997(MYC)|ENSG00000145675(PIK3R1)|ENSG00000034152(MAP2K3)|ENSG00000105221(AKT2)|ENSG00000072736(NFATC3)|ENSG00000175054(ATR)|ENSG0000014…	hsa:22800|hsa:5933|hsa:4605|hsa:3710|hsa:5293|hsa:5600|hsa:1869|hsa:1875|hsa:7048|hsa:898|hsa:2113|hsa:4609|hsa:5295|hsa:5606|hsa:208|hsa:4775|hsa:545|hsa:890|hsa:4616|hsa:4088|hsa:7040|hsa:5934|hsa:3486|hsa:4790|hsa:1870|hsa:896|hsa:993|hsa:472	http://www.kegg.jp/kegg-bin/show_pathway?hsa04218+hsa:22800+hsa:5933+hsa:4605+hsa:3710+hsa:5293+hsa:5600+hsa:1869+hsa:1875+hsa:7048+hsa:898+hsa:2113+hsa:4609+hsa:5295+hsa:5606+hsa:208+hsa:4775+hsa:545+hsa:890+hsa:4616+hsa:4088+hsa:7040+hsa:5934+hsa:3486+hsa:4790+hsa:1870+hsa:896+hsa:993+hsa:472
hsa04623	Cytosolic DNA-sensing pathway	14	1268	75	7681	0.352181	0.792731	0.186667	ENSG00000124256(ZBP1)|ENSG00000171855(IFNB1)|ENSG00000058600(POLR3E)|ENSG00000275302(CCL4)|ENSG00000276070(CCL4L2)|ENSG00000276070(CCL4L2)|ENSG00000125538(IL1B)|ENSG00000107201(DDX58)|ENSG00000100906(NFKBIA)|ENSG00000137275(RIPK1)|ENSG00000147873(IFNA5)|ENSG00000109320(NFKB1)|ENSG00000162711(NLRP3)|ENSG00000271503(CCL5)	hsa:81030|hsa:3456|hsa:55718|hsa:6351|hsa:9560|hsa:388372|hsa:3553|hsa:23586|hsa:4792|hsa:8737|hsa:3442|hsa:4790|hsa:114548|hsa:6352	http://www.kegg.jp/kegg-bin/show_pathway?hsa04623+hsa:81030+hsa:3456+hsa:55718+hsa:6351+hsa:9560+hsa:388372+hsa:3553+hsa:23586+hsa:4792+hsa:8737+hsa:3442+hsa:4790+hsa:114548+hsa:6352
hsa04935	Growth hormone synthesis, secretion and action	21	1268	116	7681	0.357848	0.792731	0.181034	ENSG00000182621(PLCB1)|ENSG00000164742(ADCY1)|ENSG00000096433(ITPR3)|ENSG00000171608(PIK3CD)|ENSG00000185386(MAPK11)|ENSG00000101333(PLCB4)|ENSG00000127955(GNAI1)|ENSG00000124181(PLCG1)|ENSG00000154229(PRKCA)|ENSG00000145675(PIK3R1)|ENSG00000034152(MAP2K3)|ENSG00000169398(PTK2)|ENSG00000105221(AKT2)|ENSG00000157017(GHRL)|ENSG00000109339(MAPK10)|ENSG00000213676(ATF6B)|ENSG00000146674(IGFBP3)|ENSG0…	hsa:23236|hsa:107|hsa:3710|hsa:5293|hsa:5600|hsa:5332|hsa:2770|hsa:5335|hsa:5578|hsa:5295|hsa:5606|hsa:5747|hsa:208|hsa:51738|hsa:5602|hsa:1388|hsa:3486|hsa:5567|hsa:5579|hsa:25759|hsa:775	http://www.kegg.jp/kegg-bin/show_pathway?hsa04935+hsa:23236+hsa:107+hsa:3710+hsa:5293+hsa:5600+hsa:5332+hsa:2770+hsa:5335+hsa:5578+hsa:5295+hsa:5606+hsa:5747+hsa:208+hsa:51738+hsa:5602+hsa:1388+hsa:3486+hsa:5567+hsa:5579+hsa:25759+hsa:775
hsa05140	Leishmaniasis	14	1268	75	7681	0.352181	0.792731	0.186667	ENSG00000198502(HLA-DRB5)|ENSG00000179344(HLA-DQB1)|ENSG00000185386(MAPK11)|ENSG00000113302(IL12B)|ENSG00000125538(IL1B)|ENSG00000232810(TNF)|ENSG00000100906(NFKBIA)|ENSG00000105329(TGFB1)|ENSG00000166501(PRKCB)|ENSG00000109320(NFKB1)|ENSG00000162747(FCGR3B)|ENSG00000203710(CR1)|ENSG00000073756(PTGS2)|ENSG00000115232(ITGA4)	hsa:3127|hsa:3119|hsa:5600|hsa:3593|hsa:3553|hsa:7124|hsa:4792|hsa:7040|hsa:5579|hsa:4790|hsa:2215|hsa:1378|hsa:5743|hsa:3676	http://www.kegg.jp/kegg-bin/show_pathway?hsa05140+hsa:3127+hsa:3119+hsa:5600+hsa:3593+hsa:3553+hsa:7124+hsa:4792+hsa:7040+hsa:5579+hsa:4790+hsa:2215+hsa:1378+hsa:5743+hsa:3676
hsa05170	Human immunodeficiency virus 1 infection	36	1268	204	7681	0.357151	0.792731	0.176471	ENSG00000186469(GNG2)|ENSG00000171855(IFNB1)|ENSG00000128383(APOBEC3A)|ENSG00000128383(APOBEC3A)|ENSG00000171791(BCL2)|ENSG00000096433(ITPR3)|ENSG00000171608(PIK3CD)|ENSG00000185386(MAPK11)|ENSG00000127920(GNG11)|ENSG00000127955(GNAI1)|ENSG00000124181(PLCG1)|ENSG00000154229(PRKCA)|ENSG00000165410(CFL2)|ENSG00000145675(PIK3R1)|ENSG00000034152(MAP2K3)|ENSG00000169398(PTK2)|ENSG00000105221(AKT2)|ENS…	hsa:54331|hsa:3456|hsa:200315|hsa:100913187|hsa:596|hsa:3710|hsa:5293|hsa:5600|hsa:2791|hsa:2770|hsa:5335|hsa:5578|hsa:1073|hsa:5295|hsa:5606|hsa:5747|hsa:208|hsa:94235|hsa:2775|hsa:4775|hsa:545|hsa:130340|hsa:7124|hsa:916|hsa:356|hsa:4792|hsa:5602|hsa:8737|hsa:3442|hsa:6199|hsa:10681|hsa:5579|hsa:4790|hsa:995|hsa:472|hsa:919	http://www.kegg.jp/kegg-bin/show_pathway?hsa05170+hsa:54331+hsa:3456+hsa:200315+hsa:100913187+hsa:596+hsa:3710+hsa:5293+hsa:5600+hsa:2791+hsa:2770+hsa:5335+hsa:5578+hsa:1073+hsa:5295+hsa:5606+hsa:5747+hsa:208+hsa:94235+hsa:2775+hsa:4775+hsa:545+hsa:130340+hsa:7124+hsa:916+hsa:356+hsa:4792+hsa:5602+hsa:8737+hsa:3442+hsa:6199+hsa:10681+hsa:5579+hsa:4790+hsa:995+hsa:472+hsa:919
hsa05213	Endometrial cancer	11	1268	58	7681	0.358297	0.792731	0.189655	ENSG00000171608(PIK3CD)|ENSG00000138798(EGF)|ENSG00000081059(TCF7)|ENSG00000136997(MYC)|ENSG00000145675(PIK3R1)|ENSG00000105221(AKT2)|ENSG00000157764(BRAF)|ENSG00000168646(AXIN2)|ENSG00000099860(GADD45B)|ENSG00000039068(CDH1)|ENSG00000138795(LEF1)	hsa:5293|hsa:1950|hsa:6932|hsa:4609|hsa:5295|hsa:208|hsa:673|hsa:8313|hsa:4616|hsa:999|hsa:51176	http://www.kegg.jp/kegg-bin/show_pathway?hsa05213+hsa:5293+hsa:1950+hsa:6932+hsa:4609+hsa:5295+hsa:208+hsa:673+hsa:8313+hsa:4616+hsa:999+hsa:51176
hsa05219	Bladder cancer	8	1268	41	7681	0.362985	0.798115	0.195122	ENSG00000100373(UPK3A)|ENSG00000137801(THBS1)|ENSG00000101412(E2F1)|ENSG00000138798(EGF)|ENSG00000136997(MYC)|ENSG00000157764(BRAF)|ENSG00000039068(CDH1)|ENSG00000007968(E2F2)	hsa:7380|hsa:7057|hsa:1869|hsa:1950|hsa:4609|hsa:673|hsa:999|hsa:1870	http://www.kegg.jp/kegg-bin/show_pathway?hsa05219+hsa:7380+hsa:7057+hsa:1869+hsa:1950+hsa:4609+hsa:673+hsa:999+hsa:1870
hsa04150	mTOR signaling pathway	27	1268	152	7681	0.370022	0.807605	0.177632	ENSG00000176641(RNF152)|ENSG00000154764(WNT7A)|ENSG00000072133(RPS6KA6)|ENSG00000070018(LRP6)|ENSG00000171608(PIK3CD)|ENSG00000164327(RICTOR)|ENSG00000108379(WNT3)|ENSG00000075290(WNT8B)|ENSG00000103091(WDR59)|ENSG00000154229(PRKCA)|ENSG00000002745(WNT16)|ENSG00000145675(PIK3R1)|ENSG00000140443(IGF1R)|ENSG00000105221(AKT2)|ENSG00000157764(BRAF)|ENSG00000141564(RPTOR)|ENSG00000266173(STRADA)|ENSG0…	hsa:220441|hsa:7476|hsa:27330|hsa:4040|hsa:5293|hsa:253260|hsa:7473|hsa:7479|hsa:79726|hsa:5578|hsa:51384|hsa:5295|hsa:3480|hsa:208|hsa:673|hsa:57521|hsa:92335|hsa:7124|hsa:54541|hsa:7480|hsa:7471|hsa:534|hsa:6199|hsa:5579|hsa:127124|hsa:23175|hsa:54361	http://www.kegg.jp/kegg-bin/show_pathway?hsa04150+hsa:220441+hsa:7476+hsa:27330+hsa:4040+hsa:5293+hsa:253260+hsa:7473+hsa:7479+hsa:79726+hsa:5578+hsa:51384+hsa:5295+hsa:3480+hsa:208+hsa:673+hsa:57521+hsa:92335+hsa:7124+hsa:54541+hsa:7480+hsa:7471+hsa:534+hsa:6199+hsa:5579+hsa:127124+hsa:23175+hsa:54361
hsa05212	Pancreatic cancer	14	1268	76	7681	0.371863	0.807605	0.184211	ENSG00000171608(PIK3CD)|ENSG00000101412(E2F1)|ENSG00000163513(TGFBR2)|ENSG00000138798(EGF)|ENSG00000145675(PIK3R1)|ENSG00000105221(AKT2)|ENSG00000157764(BRAF)|ENSG00000109339(MAPK10)|ENSG00000099860(GADD45B)|ENSG00000175634(RPS6KB2)|ENSG00000166949(SMAD3)|ENSG00000105329(TGFB1)|ENSG00000109320(NFKB1)|ENSG00000007968(E2F2)	hsa:5293|hsa:1869|hsa:7048|hsa:1950|hsa:5295|hsa:208|hsa:673|hsa:5602|hsa:4616|hsa:6199|hsa:4088|hsa:7040|hsa:4790|hsa:1870	http://www.kegg.jp/kegg-bin/show_pathway?hsa05212+hsa:5293+hsa:1869+hsa:7048+hsa:1950+hsa:5295+hsa:208+hsa:673+hsa:5602+hsa:4616+hsa:6199+hsa:4088+hsa:7040+hsa:4790+hsa:1870
hsa04260	Cardiac muscle contraction	15	1268	82	7681	0.375313	0.810126	0.182927	ENSG00000198804(MT-CO1)|ENSG00000198727(MT-CYB)|ENSG00000157445(CACNA2D3)|ENSG00000198336(MYL4)|ENSG00000100678(SLC8A3)|ENSG00000198467(TPM2)|ENSG00000075461(CACNG4)|ENSG00000165995(CACNB2)|ENSG00000018625(ATP1A2)|ENSG00000132681(ATP1A4)|ENSG00000198626(RYR2)|ENSG00000163399(ATP1A1)|ENSG00000142408(CACNG8)|ENSG00000151067(CACNA1C)|ENSG00000182389(CACNB4)	hsa:4512|hsa:4519|hsa:55799|hsa:4635|hsa:6547|hsa:7169|hsa:27092|hsa:783|hsa:477|hsa:480|hsa:6262|hsa:476|hsa:59283|hsa:775|hsa:785	http://www.kegg.jp/kegg-bin/show_pathway?hsa04260+hsa:4512+hsa:4519+hsa:55799+hsa:4635+hsa:6547+hsa:7169+hsa:27092+hsa:783+hsa:477+hsa:480+hsa:6262+hsa:476+hsa:59283+hsa:775+hsa:785
hsa04370	VEGF signaling pathway	11	1268	59	7681	0.380819	0.817031	0.186441	ENSG00000171608(PIK3CD)|ENSG00000185386(MAPK11)|ENSG00000124181(PLCG1)|ENSG00000154229(PRKCA)|ENSG00000145675(PIK3R1)|ENSG00000169398(PTK2)|ENSG00000105221(AKT2)|ENSG00000128052(KDR)|ENSG00000166501(PRKCB)|ENSG00000129946(SHC2)|ENSG00000073756(PTGS2)	hsa:5293|hsa:5600|hsa:5335|hsa:5578|hsa:5295|hsa:5747|hsa:208|hsa:3791|hsa:5579|hsa:25759|hsa:5743	http://www.kegg.jp/kegg-bin/show_pathway?hsa04370+hsa:5293+hsa:5600+hsa:5335+hsa:5578+hsa:5295+hsa:5747+hsa:208+hsa:3791+hsa:5579+hsa:25759+hsa:5743
hsa04950	Maturity onset diabetes of the young	4	1268	19	7681	0.385626	0.822359	0.210526	ENSG00000170608(FOXA3)|ENSG00000116833(NR5A2)|ENSG00000007372(PAX6)|ENSG00000275410(HNF1B)	hsa:3171|hsa:2494|hsa:5080|hsa:6928	http://www.kegg.jp/kegg-bin/show_pathway?hsa04950+hsa:3171+hsa:2494+hsa:5080+hsa:6928
hsa00740	Riboflavin metabolism	2	1268	8	7681	0.390399	0.82535	0.25	ENSG00000154269(ENPP3)|ENSG00000197594(ENPP1)	hsa:5169|hsa:5167	http://www.kegg.jp/kegg-bin/show_pathway?hsa00740+hsa:5169+hsa:5167
hsa04976	Bile secretion	14	1268	77	7681	0.391692	0.82535	0.181818	ENSG00000164742(ADCY1)|ENSG00000135226(UGT2B28)|ENSG00000018625(ATP1A2)|ENSG00000005471(ABCB4)|ENSG00000085563(ABCB1)|ENSG00000070031(SCT)|ENSG00000132681(ATP1A4)|ENSG00000080493(SLC4A4)|ENSG00000240583(AQP1)|ENSG00000142875(PRKACB)|ENSG00000163399(ATP1A1)|ENSG00000137204(SLC22A7)|ENSG00000197888(UGT2B17)|ENSG00000143921(ABCG8)	hsa:107|hsa:54490|hsa:477|hsa:5244|hsa:5243|hsa:6343|hsa:480|hsa:8671|hsa:358|hsa:5567|hsa:476|hsa:10864|hsa:7367|hsa:64241	http://www.kegg.jp/kegg-bin/show_pathway?hsa04976+hsa:107+hsa:54490+hsa:477+hsa:5244+hsa:5243+hsa:6343+hsa:480+hsa:8671+hsa:358+hsa:5567+hsa:476+hsa:10864+hsa:7367+hsa:64241
hsa04630	JAK-STAT signaling pathway	27	1268	154	7681	0.398096	0.833881	0.175325	ENSG00000205755(CRLF2)|ENSG00000172179(PRL)|ENSG00000171855(IFNB1)|ENSG00000171791(BCL2)|ENSG00000171608(PIK3CD)|ENSG00000103522(IL21R)|ENSG00000127318(IL22)|ENSG00000111536(IL26)|ENSG00000134352(IL6ST)|ENSG00000113494(PRLR)|ENSG00000138798(EGF)|ENSG00000136997(MYC)|ENSG00000145675(PIK3R1)|ENSG00000213928(IRF9)|ENSG00000113302(IL12B)|ENSG00000105221(AKT2)|ENSG00000182393(IFNL1)|ENSG00000137070(IL…	hsa:64109|hsa:5617|hsa:3456|hsa:596|hsa:5293|hsa:50615|hsa:50616|hsa:55801|hsa:3572|hsa:5618|hsa:1950|hsa:4609|hsa:5295|hsa:10379|hsa:3593|hsa:208|hsa:282618|hsa:3590|hsa:3718|hsa:5159|hsa:338376|hsa:3442|hsa:6775|hsa:896|hsa:3568|hsa:4352|hsa:1441	http://www.kegg.jp/kegg-bin/show_pathway?hsa04630+hsa:64109+hsa:5617+hsa:3456+hsa:596+hsa:5293+hsa:50615+hsa:50616+hsa:55801+hsa:3572+hsa:5618+hsa:1950+hsa:4609+hsa:5295+hsa:10379+hsa:3593+hsa:208+hsa:282618+hsa:3590+hsa:3718+hsa:5159+hsa:338376+hsa:3442+hsa:6775+hsa:896+hsa:3568+hsa:4352+hsa:1441
hsa00760	Nicotinate and nicotinamide metabolism	7	1268	37	7681	0.412233	0.843529	0.189189	ENSG00000185013(NT5C1B)|ENSG00000154269(ENPP3)|ENSG00000004468(CD38)|ENSG00000205309(NT5M)|ENSG00000197594(ENPP1)|ENSG00000135318(NT5E)|ENSG00000116981(NT5C1A)	hsa:93034|hsa:5169|hsa:952|hsa:56953|hsa:5167|hsa:4907|hsa:84618	http://www.kegg.jp/kegg-bin/show_pathway?hsa00760+hsa:93034+hsa:5169+hsa:952+hsa:56953+hsa:5167+hsa:4907+hsa:84618
hsa04610	Complement and coagulation cascades	14	1268	78	7681	0.411614	0.843529	0.179487	ENSG00000120885(CLU)|ENSG00000117525(F3)|ENSG00000164220(F2RL2)|ENSG00000140678(ITGAX)|ENSG00000175899(A2M)|ENSG00000124491(F13A1)|ENSG00000198734(F5)|ENSG00000123843(C4BPB)|ENSG00000109072(VTN)|ENSG00000003436(TFPI)|ENSG00000127533(F2RL3)|ENSG00000196352(CD55)|ENSG00000135919(SERPINE2)|ENSG00000203710(CR1)	hsa:1191|hsa:2152|hsa:2151|hsa:3687|hsa:2|hsa:2162|hsa:2153|hsa:725|hsa:7448|hsa:7035|hsa:9002|hsa:1604|hsa:5270|hsa:1378	http://www.kegg.jp/kegg-bin/show_pathway?hsa04610+hsa:1191+hsa:2152+hsa:2151+hsa:3687+hsa:2+hsa:2162+hsa:2153+hsa:725+hsa:7448+hsa:7035+hsa:9002+hsa:1604+hsa:5270+hsa:1378
hsa05216	Thyroid cancer	7	1268	37	7681	0.412233	0.843529	0.189189	ENSG00000081059(TCF7)|ENSG00000136997(MYC)|ENSG00000157764(BRAF)|ENSG00000099860(GADD45B)|ENSG00000039068(CDH1)|ENSG00000138795(LEF1)|ENSG00000198400(NTRK1)	hsa:6932|hsa:4609|hsa:673|hsa:4616|hsa:999|hsa:51176|hsa:4914	http://www.kegg.jp/kegg-bin/show_pathway?hsa05216+hsa:6932+hsa:4609+hsa:673+hsa:4616+hsa:999+hsa:51176+hsa:4914
hsa05223	Non-small cell lung cancer	13	1268	72	7681	0.409284	0.843529	0.180556	ENSG00000101109(STK4)|ENSG00000171608(PIK3CD)|ENSG00000101412(E2F1)|ENSG00000138798(EGF)|ENSG00000124181(PLCG1)|ENSG00000154229(PRKCA)|ENSG00000145675(PIK3R1)|ENSG00000105221(AKT2)|ENSG00000157764(BRAF)|ENSG00000105639(JAK3)|ENSG00000099860(GADD45B)|ENSG00000166501(PRKCB)|ENSG00000007968(E2F2)	hsa:6789|hsa:5293|hsa:1869|hsa:1950|hsa:5335|hsa:5578|hsa:5295|hsa:208|hsa:673|hsa:3718|hsa:4616|hsa:5579|hsa:1870	http://www.kegg.jp/kegg-bin/show_pathway?hsa05223+hsa:6789+hsa:5293+hsa:1869+hsa:1950+hsa:5335+hsa:5578+hsa:5295+hsa:208+hsa:673+hsa:3718+hsa:4616+hsa:5579+hsa:1870
hsa05130	Pathogenic Escherichia coli infection	33	1268	191	7681	0.416289	0.846934	0.172775	ENSG00000132970(WASF3)|ENSG00000100055(CYTH4)|ENSG00000178462(TUBAL3)|ENSG00000134873(CLDN10)|ENSG00000101162(TUBB1)|ENSG00000185386(MAPK11)|ENSG00000184113(CLDN5)|ENSG00000196586(MYO6)|ENSG00000133627(ACTR3B)|ENSG00000121858(TNFSF10)|ENSG00000112290(WASF1)|ENSG00000125538(IL1B)|ENSG00000010810(FYN)|ENSG00000071051(NCK2)|ENSG00000055163(CYFIP2)|ENSG00000171217(CLDN20)|ENSG00000176986(SEC24C)|ENSG…	hsa:10810|hsa:27128|hsa:79861|hsa:9071|hsa:81027|hsa:5600|hsa:7122|hsa:4646|hsa:57180|hsa:8743|hsa:8936|hsa:3553|hsa:2534|hsa:8440|hsa:26999|hsa:49861|hsa:9632|hsa:7430|hsa:7124|hsa:356|hsa:4792|hsa:5010|hsa:5602|hsa:57121|hsa:8737|hsa:4629|hsa:4628|hsa:283446|hsa:4790|hsa:114548|hsa:112714|hsa:7100|hsa:7277	http://www.kegg.jp/kegg-bin/show_pathway?hsa05130+hsa:10810+hsa:27128+hsa:79861+hsa:9071+hsa:81027+hsa:5600+hsa:7122+hsa:4646+hsa:57180+hsa:8743+hsa:8936+hsa:3553+hsa:2534+hsa:8440+hsa:26999+hsa:49861+hsa:9632+hsa:7430+hsa:7124+hsa:356+hsa:4792+hsa:5010+hsa:5602+hsa:57121+hsa:8737+hsa:4629+hsa:4628+hsa:283446+hsa:4790+hsa:114548+hsa:112714+hsa:7100+hsa:7277
hsa00310	Lysine degradation	11	1268	61	7681	0.42616	0.862061	0.180328	ENSG00000104885(DOT1L)|ENSG00000116731(PRDM2)|ENSG00000101945(SUV39H1)|ENSG00000005483(KMT2E)|ENSG00000118058(KMT2A)|ENSG00000152952(PLOD2)|ENSG00000085276(MECOM)|ENSG00000106462(EZH2)|ENSG00000185420(SMYD3)|ENSG00000139718(SETD1B)|ENSG00000116539(ASH1L)	hsa:84444|hsa:7799|hsa:6839|hsa:55904|hsa:4297|hsa:5352|hsa:2122|hsa:2146|hsa:64754|hsa:23067|hsa:55870	http://www.kegg.jp/kegg-bin/show_pathway?hsa00310+hsa:84444+hsa:7799+hsa:6839+hsa:55904+hsa:4297+hsa:5352+hsa:2122+hsa:2146+hsa:64754+hsa:23067+hsa:55870
hsa01522	Endocrine resistance	17	1268	97	7681	0.435076	0.864522	0.175258	ENSG00000164850(GPER1)|ENSG00000164742(ADCY1)|ENSG00000171791(BCL2)|ENSG00000171608(PIK3CD)|ENSG00000185386(MAPK11)|ENSG00000101412(E2F1)|ENSG00000145675(PIK3R1)|ENSG00000140443(IGF1R)|ENSG00000169398(PTK2)|ENSG00000105221(AKT2)|ENSG00000157764(BRAF)|ENSG00000140009(ESR2)|ENSG00000109339(MAPK10)|ENSG00000175634(RPS6KB2)|ENSG00000142875(PRKACB)|ENSG00000007968(E2F2)|ENSG00000129946(SHC2)	hsa:2852|hsa:107|hsa:596|hsa:5293|hsa:5600|hsa:1869|hsa:5295|hsa:3480|hsa:5747|hsa:208|hsa:673|hsa:2100|hsa:5602|hsa:6199|hsa:5567|hsa:1870|hsa:25759	http://www.kegg.jp/kegg-bin/show_pathway?hsa01522+hsa:2852+hsa:107+hsa:596+hsa:5293+hsa:5600+hsa:1869+hsa:5295+hsa:3480+hsa:5747+hsa:208+hsa:673+hsa:2100+hsa:5602+hsa:6199+hsa:5567+hsa:1870+hsa:25759
hsa04071	Sphingolipid signaling pathway	21	1268	121	7681	0.438087	0.864522	0.173554	ENSG00000172296(SPTLC3)|ENSG00000182621(PLCB1)|ENSG00000171791(BCL2)|ENSG00000171608(PIK3CD)|ENSG00000185386(MAPK11)|ENSG00000101333(PLCB4)|ENSG00000127955(GNAI1)|ENSG00000154229(PRKCA)|ENSG00000149534(MS4A2)|ENSG00000145675(PIK3R1)|ENSG00000170989(S1PR1)|ENSG00000105221(AKT2)|ENSG00000010810(FYN)|ENSG00000196542(SPTSSB)|ENSG00000232810(TNF)|ENSG00000109339(MAPK10)|ENSG00000154227(CERS3)|ENSG0000…	hsa:55304|hsa:23236|hsa:596|hsa:5293|hsa:5600|hsa:5332|hsa:2770|hsa:5578|hsa:2206|hsa:5295|hsa:1901|hsa:208|hsa:2534|hsa:165679|hsa:7124|hsa:5602|hsa:204219|hsa:53637|hsa:5579|hsa:4790|hsa:2205	http://www.kegg.jp/kegg-bin/show_pathway?hsa04071+hsa:55304+hsa:23236+hsa:596+hsa:5293+hsa:5600+hsa:5332+hsa:2770+hsa:5578+hsa:2206+hsa:5295+hsa:1901+hsa:208+hsa:2534+hsa:165679+hsa:7124+hsa:5602+hsa:204219+hsa:53637+hsa:5579+hsa:4790+hsa:2205
hsa04114	Oocyte meiosis	24	1268	139	7681	0.439587	0.864522	0.172662	ENSG00000077935(SMC1B)|ENSG00000072133(RPS6KA6)|ENSG00000129810(SGO1)|ENSG00000164742(ADCY1)|ENSG00000058404(CAMK2B)|ENSG00000096433(ITPR3)|ENSG00000185386(MAPK11)|ENSG00000250254(PTTG2)|ENSG00000169083(AR)|ENSG00000082175(PGR)|ENSG00000163806(SPDYA)|ENSG00000105173(CCNE1)|ENSG00000127564(PKMYT1)|ENSG00000176248(ANAPC2)|ENSG00000140443(IGF1R)|ENSG00000214300(SPDYE3)|ENSG00000166851(PLK1)|ENSG0000…	hsa:27127|hsa:27330|hsa:151648|hsa:107|hsa:816|hsa:3710|hsa:5600|hsa:10744|hsa:367|hsa:5241|hsa:245711|hsa:898|hsa:9088|hsa:29882|hsa:3480|hsa:441272|hsa:5347|hsa:818|hsa:10734|hsa:5567|hsa:442572|hsa:995|hsa:699|hsa:991	http://www.kegg.jp/kegg-bin/show_pathway?hsa04114+hsa:27127+hsa:27330+hsa:151648+hsa:107+hsa:816+hsa:3710+hsa:5600+hsa:10744+hsa:367+hsa:5241+hsa:245711+hsa:898+hsa:9088+hsa:29882+hsa:3480+hsa:441272+hsa:5347+hsa:818+hsa:10734+hsa:5567+hsa:442572+hsa:995+hsa:699+hsa:991
hsa04966	Collecting duct acid secretion	5	1268	26	7681	0.432927	0.864522	0.192308	ENSG00000105929(ATP6V0A4)|ENSG00000213760(ATP6V1G2)|ENSG00000171130(ATP6V0E2)|ENSG00000151418(ATP6V1G3)|ENSG00000004939(SLC4A1)	hsa:50617|hsa:534|hsa:155066|hsa:127124|hsa:6521	http://www.kegg.jp/kegg-bin/show_pathway?hsa04966+hsa:50617+hsa:534+hsa:155066+hsa:127124+hsa:6521
hsa05171	Coronavirus disease - COVID-19	37	1268	216	7681	0.430294	0.864522	0.171296	ENSG00000100316(RPL3)|ENSG00000184012(TMPRSS2)|ENSG00000157601(MX1)|ENSG00000183486(MX2)|ENSG00000171855(IFNB1)|ENSG00000198034(RPS4X)|ENSG00000171608(PIK3CD)|ENSG00000185386(MAPK11)|ENSG00000196664(TLR7)|ENSG00000134352(IL6ST)|ENSG00000124181(PLCG1)|ENSG00000154229(PRKCA)|ENSG00000071082(RPL31)|ENSG00000145675(PIK3R1)|ENSG00000213928(IRF9)|ENSG00000145425(RPS3A)|ENSG00000113302(IL12B)|ENSG000001…	hsa:6122|hsa:7113|hsa:4599|hsa:4600|hsa:3456|hsa:6191|hsa:5293|hsa:5600|hsa:51284|hsa:3572|hsa:5335|hsa:5578|hsa:6160|hsa:5295|hsa:10379|hsa:6189|hsa:3593|hsa:3553|hsa:2162|hsa:23586|hsa:7124|hsa:4792|hsa:5602|hsa:4142|hsa:3442|hsa:6403|hsa:5579|hsa:4790|hsa:6161|hsa:6208|hsa:6222|hsa:114548|hsa:4938|hsa:4940|hsa:4939|hsa:5610|hsa:9636	http://www.kegg.jp/kegg-bin/show_pathway?hsa05171+hsa:6122+hsa:7113+hsa:4599+hsa:4600+hsa:3456+hsa:6191+hsa:5293+hsa:5600+hsa:51284+hsa:3572+hsa:5335+hsa:5578+hsa:6160+hsa:5295+hsa:10379+hsa:6189+hsa:3593+hsa:3553+hsa:2162+hsa:23586+hsa:7124+hsa:4792+hsa:5602+hsa:4142+hsa:3442+hsa:6403+hsa:5579+hsa:4790+hsa:6161+hsa:6208+hsa:6222+hsa:114548+hsa:4938+hsa:4940+hsa:4939+hsa:5610+hsa:9636
hsa03266	Virion - Herpesvirus	2	1268	9	7681	0.452097	0.865093	0.222222	ENSG00000121716(PILRB)|ENSG00000259207(ITGB3)	hsa:29990|hsa:3690	http://www.kegg.jp/kegg-bin/show_pathway?hsa03266+hsa:29990+hsa:3690
hsa04115	p53 signaling pathway	13	1268	74	7681	0.45079	0.865093	0.175676	ENSG00000171791(BCL2)|ENSG00000137801(THBS1)|ENSG00000080546(SESN1)|ENSG00000149212(SESN3)|ENSG00000105173(CCNE1)|ENSG00000181790(ADGRB1)|ENSG00000175054(ATR)|ENSG00000099860(GADD45B)|ENSG00000146674(IGFBP3)|ENSG00000112576(CCND3)|ENSG00000149311(ATM)|ENSG00000171848(RRM2)|ENSG00000198625(MDM4)	hsa:596|hsa:7057|hsa:27244|hsa:143686|hsa:898|hsa:575|hsa:545|hsa:4616|hsa:3486|hsa:896|hsa:472|hsa:6241|hsa:4194	http://www.kegg.jp/kegg-bin/show_pathway?hsa04115+hsa:596+hsa:7057+hsa:27244+hsa:143686+hsa:898+hsa:575+hsa:545+hsa:4616+hsa:3486+hsa:896+hsa:472+hsa:6241+hsa:4194
hsa04927	Cortisol synthesis and secretion	11	1268	62	7681	0.448826	0.865093	0.177419	ENSG00000100346(CACNA1I)|ENSG00000182621(PLCB1)|ENSG00000164742(ADCY1)|ENSG00000096433(ITPR3)|ENSG00000101333(PLCB4)|ENSG00000140459(CYP11A1)|ENSG00000213676(ATF6B)|ENSG00000142875(PRKACB)|ENSG00000185630(PBX1)|ENSG00000151067(CACNA1C)|ENSG00000135744(AGT)	hsa:8911|hsa:23236|hsa:107|hsa:3710|hsa:5332|hsa:1583|hsa:1388|hsa:5567|hsa:5087|hsa:775|hsa:183	http://www.kegg.jp/kegg-bin/show_pathway?hsa04927+hsa:8911+hsa:23236+hsa:107+hsa:3710+hsa:5332+hsa:1583+hsa:1388+hsa:5567+hsa:5087+hsa:775+hsa:183
hsa05120	Epithelial cell signaling in Helicobacter pylori infection	12	1268	68	7681	0.449901	0.865093	0.176471	ENSG00000185386(MAPK11)|ENSG00000105929(ATP6V0A4)|ENSG00000166086(JAM3)|ENSG00000124181(PLCG1)|ENSG00000163464(CXCR1)|ENSG00000100906(NFKBIA)|ENSG00000109339(MAPK10)|ENSG00000213760(ATP6V1G2)|ENSG00000109320(NFKB1)|ENSG00000171130(ATP6V0E2)|ENSG00000151418(ATP6V1G3)|ENSG00000271503(CCL5)	hsa:5600|hsa:50617|hsa:83700|hsa:5335|hsa:3577|hsa:4792|hsa:5602|hsa:534|hsa:4790|hsa:155066|hsa:127124|hsa:6352	http://www.kegg.jp/kegg-bin/show_pathway?hsa05120+hsa:5600+hsa:50617+hsa:83700+hsa:5335+hsa:3577+hsa:4792+hsa:5602+hsa:534+hsa:4790+hsa:155066+hsa:127124+hsa:6352
hsa05230	Central carbon metabolism in cancer	12	1268	68	7681	0.449901	0.865093	0.176471	ENSG00000166796(LDHC)|ENSG00000171608(PIK3CD)|ENSG00000136997(MYC)|ENSG00000145675(PIK3R1)|ENSG00000105221(AKT2)|ENSG00000156510(HKDC1)|ENSG00000113721(PDGFRB)|ENSG00000066468(FGFR2)|ENSG00000077782(FGFR1)|ENSG00000100644(HIF1A)|ENSG00000152256(PDK1)|ENSG00000198400(NTRK1)	hsa:3948|hsa:5293|hsa:4609|hsa:5295|hsa:208|hsa:80201|hsa:5159|hsa:2263|hsa:2260|hsa:3091|hsa:5163|hsa:4914	http://www.kegg.jp/kegg-bin/show_pathway?hsa05230+hsa:3948+hsa:5293+hsa:4609+hsa:5295+hsa:208+hsa:80201+hsa:5159+hsa:2263+hsa:2260+hsa:3091+hsa:5163+hsa:4914
hsa00500	Starch and sucrose metabolism	6	1268	33	7681	0.469047	0.880342	0.181818	ENSG00000249948(GBA3)|ENSG00000257743(MGAM2)|ENSG00000154269(ENPP3)|ENSG00000257335(MGAM)|ENSG00000156510(HKDC1)|ENSG00000197594(ENPP1)	hsa:57733|hsa:93432|hsa:5169|hsa:8972|hsa:80201|hsa:5167	http://www.kegg.jp/kegg-bin/show_pathway?hsa00500+hsa:57733+hsa:93432+hsa:5169+hsa:8972+hsa:80201+hsa:5167
hsa00532	Glycosaminoglycan biosynthesis - chondroitin sulfate / dermatan sulfate	4	1268	21	7681	0.465273	0.880342	0.190476	ENSG00000147408(CSGALNACT1)|ENSG00000171451(DSEL)|ENSG00000111962(UST)|ENSG00000136213(CHST12)	hsa:55790|hsa:92126|hsa:10090|hsa:55501	http://www.kegg.jp/kegg-bin/show_pathway?hsa00532+hsa:55790+hsa:92126+hsa:10090+hsa:55501
hsa00770	Pantothenate and CoA biosynthesis	4	1268	21	7681	0.465273	0.880342	0.190476	ENSG00000100024(UPB1)|ENSG00000154269(ENPP3)|ENSG00000152782(PANK1)|ENSG00000197594(ENPP1)	hsa:51733|hsa:5169|hsa:53354|hsa:5167	http://www.kegg.jp/kegg-bin/show_pathway?hsa00770+hsa:51733+hsa:5169+hsa:53354+hsa:5167
hsa04380	Osteoclast differentiation	23	1268	135	7681	0.470013	0.880342	0.17037	ENSG00000171855(IFNB1)|ENSG00000096433(ITPR3)|ENSG00000171608(PIK3CD)|ENSG00000185386(MAPK11)|ENSG00000239961(LILRA4)|ENSG00000152495(CAMK4)|ENSG00000163513(TGFBR2)|ENSG00000145675(PIK3R1)|ENSG00000213928(IRF9)|ENSG00000104856(RELB)|ENSG00000105221(AKT2)|ENSG00000125538(IL1B)|ENSG00000010810(FYN)|ENSG00000115641(FHL2)|ENSG00000232810(TNF)|ENSG00000100906(NFKBIA)|ENSG00000109339(MAPK10)|ENSG000000…	hsa:3456|hsa:3710|hsa:5293|hsa:5600|hsa:23547|hsa:814|hsa:7048|hsa:5295|hsa:10379|hsa:5971|hsa:208|hsa:3553|hsa:2534|hsa:2274|hsa:7124|hsa:4792|hsa:5602|hsa:3937|hsa:3690|hsa:7040|hsa:4790|hsa:10288|hsa:2215	http://www.kegg.jp/kegg-bin/show_pathway?hsa04380+hsa:3456+hsa:3710+hsa:5293+hsa:5600+hsa:23547+hsa:814+hsa:7048+hsa:5295+hsa:10379+hsa:5971+hsa:208+hsa:3553+hsa:2534+hsa:2274+hsa:7124+hsa:4792+hsa:5602+hsa:3937+hsa:3690+hsa:7040+hsa:4790+hsa:10288+hsa:2215
hsa04668	TNF signaling pathway	20	1268	118	7681	0.487123	0.902836	0.169492	ENSG00000171855(IFNB1)|ENSG00000078401(EDN1)|ENSG00000171608(PIK3CD)|ENSG00000185386(MAPK11)|ENSG00000056558(TRAF1)|ENSG00000145675(PIK3R1)|ENSG00000034152(MAP2K3)|ENSG00000118503(TNFAIP3)|ENSG00000105221(AKT2)|ENSG00000125538(IL1B)|ENSG00000226979(LTA)|ENSG00000232810(TNF)|ENSG00000100906(NFKBIA)|ENSG00000109339(MAPK10)|ENSG00000007908(SELE)|ENSG00000137275(RIPK1)|ENSG00000213676(ATF6B)|ENSG0000…	hsa:3456|hsa:1906|hsa:5293|hsa:5600|hsa:7185|hsa:5295|hsa:5606|hsa:7128|hsa:208|hsa:3553|hsa:4049|hsa:7124|hsa:4792|hsa:5602|hsa:6401|hsa:8737|hsa:1388|hsa:4790|hsa:6352|hsa:5743	http://www.kegg.jp/kegg-bin/show_pathway?hsa04668+hsa:3456+hsa:1906+hsa:5293+hsa:5600+hsa:7185+hsa:5295+hsa:5606+hsa:7128+hsa:208+hsa:3553+hsa:4049+hsa:7124+hsa:4792+hsa:5602+hsa:6401+hsa:8737+hsa:1388+hsa:4790+hsa:6352+hsa:5743
hsa05418	Fluid shear stress and atherosclerosis	23	1268	136	7681	0.485404	0.902836	0.169118	ENSG00000078401(EDN1)|ENSG00000171791(BCL2)|ENSG00000171608(PIK3CD)|ENSG00000185386(MAPK11)|ENSG00000177688(SUMO4)|ENSG00000145675(PIK3R1)|ENSG00000134201(GSTM5)|ENSG00000213366(GSTM2)|ENSG00000169398(PTK2)|ENSG00000105221(AKT2)|ENSG00000125538(IL1B)|ENSG00000134184(GSTM1)|ENSG00000127528(KLF2)|ENSG00000115590(IL1R2)|ENSG00000243955(GSTA1)|ENSG00000232810(TNF)|ENSG00000109339(MAPK10)|ENSG00000081…	hsa:1906|hsa:596|hsa:5293|hsa:5600|hsa:387082|hsa:5295|hsa:2949|hsa:2946|hsa:5747|hsa:208|hsa:3553|hsa:2944|hsa:10365|hsa:7850|hsa:2938|hsa:7124|hsa:5602|hsa:4208|hsa:6401|hsa:3690|hsa:3791|hsa:4790|hsa:3674	http://www.kegg.jp/kegg-bin/show_pathway?hsa05418+hsa:1906+hsa:596+hsa:5293+hsa:5600+hsa:387082+hsa:5295+hsa:2949+hsa:2946+hsa:5747+hsa:208+hsa:3553+hsa:2944+hsa:10365+hsa:7850+hsa:2938+hsa:7124+hsa:5602+hsa:4208+hsa:6401+hsa:3690+hsa:3791+hsa:4790+hsa:3674
hsa04211	Longevity regulating pathway	15	1268	88	7681	0.490451	0.90427	0.170455	ENSG00000164742(ADCY1)|ENSG00000171608(PIK3CD)|ENSG00000080546(SESN1)|ENSG00000152495(CAMK4)|ENSG00000149212(SESN3)|ENSG00000023287(RB1CC1)|ENSG00000145675(PIK3R1)|ENSG00000110931(CAMKK2)|ENSG00000140443(IGF1R)|ENSG00000105221(AKT2)|ENSG00000141564(RPTOR)|ENSG00000175634(RPS6KB2)|ENSG00000213676(ATF6B)|ENSG00000142875(PRKACB)|ENSG00000109320(NFKB1)	hsa:107|hsa:5293|hsa:27244|hsa:814|hsa:143686|hsa:9821|hsa:5295|hsa:10645|hsa:3480|hsa:208|hsa:57521|hsa:6199|hsa:1388|hsa:5567|hsa:4790	http://www.kegg.jp/kegg-bin/show_pathway?hsa04211+hsa:107+hsa:5293+hsa:27244+hsa:814+hsa:143686+hsa:9821+hsa:5295+hsa:10645+hsa:3480+hsa:208+hsa:57521+hsa:6199+hsa:1388+hsa:5567+hsa:4790
hsa00982	Drug metabolism - cytochrome P450	10	1268	58	7681	0.494776	0.907517	0.172414	ENSG00000140505(CYP1A2)|ENSG00000135226(UGT2B28)|ENSG00000134201(GSTM5)|ENSG00000213366(GSTM2)|ENSG00000134184(GSTM1)|ENSG00000243955(GSTA1)|ENSG00000138109(CYP2C9)|ENSG00000138115(CYP2C8)|ENSG00000094963(FMO2)|ENSG00000197888(UGT2B17)	hsa:1544|hsa:54490|hsa:2949|hsa:2946|hsa:2944|hsa:2938|hsa:1559|hsa:1558|hsa:2327|hsa:7367	http://www.kegg.jp/kegg-bin/show_pathway?hsa00982+hsa:1544+hsa:54490+hsa:2949+hsa:2946+hsa:2944+hsa:2938+hsa:1559+hsa:1558+hsa:2327+hsa:7367
hsa00062	Fatty acid elongation	5	1268	28	7681	0.501601	0.913369	0.178571	ENSG00000118402(ELOVL4)|ENSG00000170522(ELOVL6)|ENSG00000221988(PPT2)|ENSG00000196407(THEM5)|ENSG00000159445(THEM4)	hsa:6785|hsa:79071|hsa:9374|hsa:284486|hsa:117145	http://www.kegg.jp/kegg-bin/show_pathway?hsa00062+hsa:6785+hsa:79071+hsa:9374+hsa:284486+hsa:117145
hsa05166	Human T-cell leukemia virus 1 infection	37	1268	222	7681	0.503127	0.913369	0.166667	ENSG00000114166(KAT2B)|ENSG00000164742(ADCY1)|ENSG00000198502(HLA-DRB5)|ENSG00000179344(HLA-DQB1)|ENSG00000171608(PIK3CD)|ENSG00000105662(CRTC1)|ENSG00000159958(TNFRSF13C)|ENSG00000101412(E2F1)|ENSG00000250254(PTTG2)|ENSG00000163513(TGFBR2)|ENSG00000105173(CCNE1)|ENSG00000134954(ETS1)|ENSG00000136997(MYC)|ENSG00000176248(ANAPC2)|ENSG00000145675(PIK3R1)|ENSG00000104856(RELB)|ENSG00000105221(AKT2)|…	hsa:8850|hsa:107|hsa:3127|hsa:3119|hsa:5293|hsa:23373|hsa:115650|hsa:1869|hsa:10744|hsa:7048|hsa:898|hsa:2113|hsa:4609|hsa:29882|hsa:5295|hsa:5971|hsa:208|hsa:4775|hsa:545|hsa:701|hsa:7850|hsa:4049|hsa:7124|hsa:916|hsa:3718|hsa:4792|hsa:890|hsa:5602|hsa:4088|hsa:7040|hsa:1388|hsa:5567|hsa:4790|hsa:1870|hsa:896|hsa:472|hsa:991	http://www.kegg.jp/kegg-bin/show_pathway?hsa05166+hsa:8850+hsa:107+hsa:3127+hsa:3119+hsa:5293+hsa:23373+hsa:115650+hsa:1869+hsa:10744+hsa:7048+hsa:898+hsa:2113+hsa:4609+hsa:29882+hsa:5295+hsa:5971+hsa:208+hsa:4775+hsa:545+hsa:701+hsa:7850+hsa:4049+hsa:7124+hsa:916+hsa:3718+hsa:4792+hsa:890+hsa:5602+hsa:4088+hsa:7040+hsa:1388+hsa:5567+hsa:4790+hsa:1870+hsa:896+hsa:472+hsa:991
hsa03273	Virion - Lassa virus and SFTS virus	3	1268	16	7681	0.506417	0.914651	0.1875	ENSG00000184226(PCDH9)|ENSG00000133392(MYH11)|ENSG00000133026(MYH10)	hsa:5101|hsa:4629|hsa:4628	http://www.kegg.jp/kegg-bin/show_pathway?hsa03273+hsa:5101+hsa:4629+hsa:4628
hsa05100	Bacterial invasion of epithelial cells	13	1268	77	7681	0.512398	0.920756	0.168831	ENSG00000062598(ELMO2)|ENSG00000171608(PIK3CD)|ENSG00000035403(VCL)|ENSG00000125354(SEPTIN6)|ENSG00000114790(ARHGEF26)|ENSG00000133627(ACTR3B)|ENSG00000145675(PIK3R1)|ENSG00000112290(WASF1)|ENSG00000169398(PTK2)|ENSG00000197959(DNM3)|ENSG00000039068(CDH1)|ENSG00000129946(SHC2)|ENSG00000115414(FN1)	hsa:63916|hsa:5293|hsa:7414|hsa:23157|hsa:26084|hsa:57180|hsa:5295|hsa:8936|hsa:5747|hsa:26052|hsa:999|hsa:25759|hsa:2335	http://www.kegg.jp/kegg-bin/show_pathway?hsa05100+hsa:63916+hsa:5293+hsa:7414+hsa:23157+hsa:26084+hsa:57180+hsa:5295+hsa:8936+hsa:5747+hsa:26052+hsa:999+hsa:25759+hsa:2335
hsa04928	Parathyroid hormone synthesis, secretion and action	19	1268	114	7681	0.521336	0.932086	0.166667	ENSG00000107485(GATA3)|ENSG00000182621(PLCB1)|ENSG00000070018(LRP6)|ENSG00000164742(ADCY1)|ENSG00000171791(BCL2)|ENSG00000096433(ITPR3)|ENSG00000113448(PDE4D)|ENSG00000101333(PLCB4)|ENSG00000127955(GNAI1)|ENSG00000184588(PDE4B)|ENSG00000154229(PRKCA)|ENSG00000137270(GCM1)|ENSG00000157764(BRAF)|ENSG00000081189(MEF2C)|ENSG00000198648(STK39)|ENSG00000077782(FGFR1)|ENSG00000213676(ATF6B)|ENSG00000142…	hsa:2625|hsa:23236|hsa:4040|hsa:107|hsa:596|hsa:3710|hsa:5144|hsa:5332|hsa:2770|hsa:5142|hsa:5578|hsa:8521|hsa:673|hsa:4208|hsa:27347|hsa:2260|hsa:1388|hsa:5567|hsa:5579	http://www.kegg.jp/kegg-bin/show_pathway?hsa04928+hsa:2625+hsa:23236+hsa:4040+hsa:107+hsa:596+hsa:3710+hsa:5144+hsa:5332+hsa:2770+hsa:5142+hsa:5578+hsa:8521+hsa:673+hsa:4208+hsa:27347+hsa:2260+hsa:1388+hsa:5567+hsa:5579
hsa04917	Prolactin signaling pathway	11	1268	66	7681	0.537827	0.956737	0.166667	ENSG00000172179(PRL)|ENSG00000171608(PIK3CD)|ENSG00000185386(MAPK11)|ENSG00000138039(LHCGR)|ENSG00000113494(PRLR)|ENSG00000145675(PIK3R1)|ENSG00000105221(AKT2)|ENSG00000140009(ESR2)|ENSG00000109339(MAPK10)|ENSG00000109320(NFKB1)|ENSG00000129946(SHC2)	hsa:5617|hsa:5293|hsa:5600|hsa:3973|hsa:5618|hsa:5295|hsa:208|hsa:2100|hsa:5602|hsa:4790|hsa:25759	http://www.kegg.jp/kegg-bin/show_pathway?hsa04917+hsa:5617+hsa:5293+hsa:5600+hsa:3973+hsa:5618+hsa:5295+hsa:208+hsa:2100+hsa:5602+hsa:4790+hsa:25759
hsa00120	Primary bile acid biosynthesis	3	1268	17	7681	0.549648	0.971516	0.176471	ENSG00000036530(CYP46A1)|ENSG00000138135(CH25H)|ENSG00000180432(CYP8B1)	hsa:10858|hsa:9023|hsa:1582	http://www.kegg.jp/kegg-bin/show_pathway?hsa00120+hsa:10858+hsa:9023+hsa:1582
hsa04722	Neurotrophin signaling pathway	19	1268	116	7681	0.554368	0.971516	0.163793	ENSG00000072133(RPS6KA6)|ENSG00000166681(BEX3)|ENSG00000171791(BCL2)|ENSG00000058404(CAMK2B)|ENSG00000171608(PIK3CD)|ENSG00000185386(MAPK11)|ENSG00000152495(CAMK4)|ENSG00000124181(PLCG1)|ENSG00000145675(PIK3R1)|ENSG00000105221(AKT2)|ENSG00000157764(BRAF)|ENSG00000134070(IRAK2)|ENSG00000117560(FASLG)|ENSG00000100906(NFKBIA)|ENSG00000109339(MAPK10)|ENSG00000148660(CAMK2G)|ENSG00000109320(NFKB1)|ENS…	hsa:27330|hsa:27018|hsa:596|hsa:816|hsa:5293|hsa:5600|hsa:814|hsa:5335|hsa:5295|hsa:208|hsa:673|hsa:3656|hsa:356|hsa:4792|hsa:5602|hsa:818|hsa:4790|hsa:25759|hsa:4914	http://www.kegg.jp/kegg-bin/show_pathway?hsa04722+hsa:27330+hsa:27018+hsa:596+hsa:816+hsa:5293+hsa:5600+hsa:814+hsa:5335+hsa:5295+hsa:208+hsa:673+hsa:3656+hsa:356+hsa:4792+hsa:5602+hsa:818+hsa:4790+hsa:25759+hsa:4914
hsa05168	Herpes simplex virus 1 infection	28	1268	171	7681	0.551686	0.971516	0.163743	ENSG00000171855(IFNB1)|ENSG00000171791(BCL2)|ENSG00000198502(HLA-DRB5)|ENSG00000179344(HLA-DQB1)|ENSG00000171608(PIK3CD)|ENSG00000126759(CFP)|ENSG00000145675(PIK3R1)|ENSG00000213928(IRF9)|ENSG00000113302(IL12B)|ENSG00000105221(AKT2)|ENSG00000125538(IL1B)|ENSG00000121716(PILRB)|ENSG00000107201(DDX58)|ENSG00000226979(LTA)|ENSG00000232810(TNF)|ENSG00000117560(FASLG)|ENSG00000143190(POU2F1)|ENSG00000…	hsa:3456|hsa:596|hsa:3127|hsa:3119|hsa:5293|hsa:5199|hsa:5295|hsa:10379|hsa:3593|hsa:208|hsa:3553|hsa:29990|hsa:23586|hsa:4049|hsa:7124|hsa:356|hsa:5451|hsa:4792|hsa:3690|hsa:3442|hsa:56829|hsa:5452|hsa:4790|hsa:4938|hsa:4940|hsa:4939|hsa:6352|hsa:5610	http://www.kegg.jp/kegg-bin/show_pathway?hsa05168+hsa:3456+hsa:596+hsa:3127+hsa:3119+hsa:5293+hsa:5199+hsa:5295+hsa:10379+hsa:3593+hsa:208+hsa:3553+hsa:29990+hsa:23586+hsa:4049+hsa:7124+hsa:356+hsa:5451+hsa:4792+hsa:3690+hsa:3442+hsa:56829+hsa:5452+hsa:4790+hsa:4938+hsa:4940+hsa:4939+hsa:6352+hsa:5610
hsa05416	Viral myocarditis	11	1268	67	7681	0.559349	0.975417	0.164179	ENSG00000102245(CD40LG)|ENSG00000198502(HLA-DRB5)|ENSG00000179344(HLA-DQB1)|ENSG00000180644(PRF1)|ENSG00000134769(DTNA)|ENSG00000127990(SGCE)|ENSG00000010810(FYN)|ENSG00000178562(CD28)|ENSG00000170624(SGCD)|ENSG00000196352(CD55)|ENSG00000108823(SGCA)	hsa:959|hsa:3127|hsa:3119|hsa:5551|hsa:1837|hsa:8910|hsa:2534|hsa:940|hsa:6444|hsa:1604|hsa:6442	http://www.kegg.jp/kegg-bin/show_pathway?hsa05416+hsa:959+hsa:3127+hsa:3119+hsa:5551+hsa:1837+hsa:8910+hsa:2534+hsa:940+hsa:6444+hsa:1604+hsa:6442
hsa00830	Retinol metabolism	9	1268	55	7681	0.568142	0.976797	0.163636	ENSG00000162496(DHRS3)|ENSG00000128918(ALDH1A2)|ENSG00000140505(CYP1A2)|ENSG00000135226(UGT2B28)|ENSG00000116745(RPE65)|ENSG00000138109(CYP2C9)|ENSG00000138115(CYP2C8)|ENSG00000170786(SDR16C5)|ENSG00000197888(UGT2B17)	hsa:9249|hsa:8854|hsa:1544|hsa:54490|hsa:6121|hsa:1559|hsa:1558|hsa:195814|hsa:7367	http://www.kegg.jp/kegg-bin/show_pathway?hsa00830+hsa:9249+hsa:8854+hsa:1544+hsa:54490+hsa:6121+hsa:1559+hsa:1558+hsa:195814+hsa:7367
hsa01523	Antifolate resistance	5	1268	30	7681	0.566788	0.976797	0.166667	ENSG00000125538(IL1B)|ENSG00000165457(FOLR2)|ENSG00000232810(TNF)|ENSG00000109320(NFKB1)|ENSG00000108839(ALOX12)	hsa:3553|hsa:2350|hsa:7124|hsa:4790|hsa:239	http://www.kegg.jp/kegg-bin/show_pathway?hsa01523+hsa:3553+hsa:2350+hsa:7124+hsa:4790+hsa:239
hsa04727	GABAergic synapse	14	1268	86	7681	0.568419	0.976797	0.162791	ENSG00000186469(GNG2)|ENSG00000164742(ADCY1)|ENSG00000111371(SLC38A1)|ENSG00000163288(GABRB1)|ENSG00000127920(GNG11)|ENSG00000127955(GNAI1)|ENSG00000154229(PRKCA)|ENSG00000167414(GNG8)|ENSG00000087258(GNAO1)|ENSG00000069966(GNB5)|ENSG00000141837(CACNA1A)|ENSG00000142875(PRKACB)|ENSG00000166501(PRKCB)|ENSG00000151067(CACNA1C)	hsa:54331|hsa:107|hsa:81539|hsa:2560|hsa:2791|hsa:2770|hsa:5578|hsa:94235|hsa:2775|hsa:10681|hsa:773|hsa:5567|hsa:5579|hsa:775	http://www.kegg.jp/kegg-bin/show_pathway?hsa04727+hsa:54331+hsa:107+hsa:81539+hsa:2560+hsa:2791+hsa:2770+hsa:5578+hsa:94235+hsa:2775+hsa:10681+hsa:773+hsa:5567+hsa:5579+hsa:775
hsa05110	Vibrio cholerae infection	8	1268	49	7681	0.573583	0.980911	0.163265	ENSG00000105929(ATP6V0A4)|ENSG00000124181(PLCG1)|ENSG00000154229(PRKCA)|ENSG00000119139(TJP2)|ENSG00000213760(ATP6V1G2)|ENSG00000142875(PRKACB)|ENSG00000171130(ATP6V0E2)|ENSG00000151418(ATP6V1G3)	hsa:50617|hsa:5335|hsa:5578|hsa:9414|hsa:534|hsa:5567|hsa:155066|hsa:127124	http://www.kegg.jp/kegg-bin/show_pathway?hsa05110+hsa:50617+hsa:5335+hsa:5578+hsa:9414+hsa:534+hsa:5567+hsa:155066+hsa:127124
hsa00232	Caffeine metabolism	1	1268	5	7681	0.594393	0.995684	0.2	ENSG00000140505(CYP1A2)	hsa:1544	http://www.kegg.jp/kegg-bin/show_pathway?hsa00232+hsa:1544
hsa00450	Selenocompound metabolism	3	1268	18	7681	0.590556	0.995684	0.166667	ENSG00000241644(INMT)|ENSG00000132330(SCLY)|ENSG00000116984(MTR)	hsa:11185|hsa:51540|hsa:4548	http://www.kegg.jp/kegg-bin/show_pathway?hsa00450+hsa:11185+hsa:51540+hsa:4548
hsa00524	Neomycin, kanamycin and gentamicin biosynthesis	1	1268	5	7681	0.594393	0.995684	0.2	ENSG00000156510(HKDC1)	hsa:80201	http://www.kegg.jp/kegg-bin/show_pathway?hsa00524+hsa:80201
hsa04215	Apoptosis - multiple species	5	1268	31	7681	0.597686	0.995684	0.16129	ENSG00000171791(BCL2)|ENSG00000109339(MAPK10)|ENSG00000184047(DIABLO)|ENSG00000089685(BIRC5)|ENSG00000153094(BCL2L11)	hsa:596|hsa:5602|hsa:56616|hsa:332|hsa:10018	http://www.kegg.jp/kegg-bin/show_pathway?hsa04215+hsa:596+hsa:5602+hsa:56616+hsa:332+hsa:10018
hsa05203	Viral carcinogenesis	32	1268	199	7681	0.595644	0.995684	0.160804	ENSG00000114166(KAT2B)|ENSG00000179388(EGR3)|ENSG00000080839(RBL1)|ENSG00000171608(PIK3CD)|ENSG00000100429(HDAC10)|ENSG00000179934(CCR8)|ENSG00000134352(IL6ST)|ENSG00000105173(CCNE1)|ENSG00000155903(RASA2)|ENSG00000056558(TRAF1)|ENSG00000145675(PIK3R1)|ENSG00000213928(IRF9)|ENSG00000124635(H2BC11)|ENSG00000197238(H4C11)|ENSG00000105639(JAK3)|ENSG00000100906(NFKBIA)|ENSG00000145386(CCNA2)|ENSG0000…	hsa:8850|hsa:1960|hsa:5933|hsa:5293|hsa:83933|hsa:1237|hsa:3572|hsa:898|hsa:5922|hsa:7185|hsa:5295|hsa:10379|hsa:8970|hsa:8363|hsa:3718|hsa:4792|hsa:890|hsa:9734|hsa:5934|hsa:8348|hsa:1388|hsa:5567|hsa:4790|hsa:23352|hsa:8343|hsa:8345|hsa:5966|hsa:896|hsa:8365|hsa:5610|hsa:991|hsa:8349	http://www.kegg.jp/kegg-bin/show_pathway?hsa05203+hsa:8850+hsa:1960+hsa:5933+hsa:5293+hsa:83933+hsa:1237+hsa:3572+hsa:898+hsa:5922+hsa:7185+hsa:5295+hsa:10379+hsa:8970+hsa:8363+hsa:3718+hsa:4792+hsa:890+hsa:9734+hsa:5934+hsa:8348+hsa:1388+hsa:5567+hsa:4790+hsa:23352+hsa:8343+hsa:8345+hsa:5966+hsa:896+hsa:8365+hsa:5610+hsa:991+hsa:8349
hsa05322	Systemic lupus erythematosus	20	1268	125	7681	0.599098	0.995684	0.16	ENSG00000196787(H2AC11)|ENSG00000278828(H3C10)|ENSG00000102245(CD40LG)|ENSG00000198502(HLA-DRB5)|ENSG00000179344(HLA-DQB1)|ENSG00000124635(H2BC11)|ENSG00000276368(H2AC14)|ENSG00000197238(H4C11)|ENSG00000100448(CTSG)|ENSG00000286522(H3C2)|ENSG00000232810(TNF)|ENSG00000178562(CD28)|ENSG00000274641(H2BC17)|ENSG00000180573(H2AC6)|ENSG00000277224(H2BC7)|ENSG00000275713(H2BC9)|ENSG00000158406(H4C8)|ENS…	hsa:8969|hsa:8357|hsa:959|hsa:3127|hsa:3119|hsa:8970|hsa:8331|hsa:8363|hsa:1511|hsa:8358|hsa:7124|hsa:940|hsa:8348|hsa:8334|hsa:8343|hsa:8345|hsa:8365|hsa:2215|hsa:92815|hsa:8349	http://www.kegg.jp/kegg-bin/show_pathway?hsa05322+hsa:8969+hsa:8357+hsa:959+hsa:3127+hsa:3119+hsa:8970+hsa:8331+hsa:8363+hsa:1511+hsa:8358+hsa:7124+hsa:940+hsa:8348+hsa:8334+hsa:8343+hsa:8345+hsa:8365+hsa:2215+hsa:92815+hsa:8349
hsa00010	Glycolysis / Gluconeogenesis	3	1268	63	7681	0.998995	1	0.047619	ENSG00000154930(ACSS1)|ENSG00000166796(LDHC)|ENSG00000156510(HKDC1)	hsa:84532|hsa:3948|hsa:80201	http://www.kegg.jp/kegg-bin/show_pathway?hsa00010+hsa:84532+hsa:3948+hsa:80201
hsa00030	Pentose phosphate pathway	3	1268	31	7681	0.906217	1	0.0967742	ENSG00000130988(RGN)|ENSG00000007350(TKTL1)|ENSG00000168237(GLYCTK)	hsa:9104|hsa:8277|hsa:132158	http://www.kegg.jp/kegg-bin/show_pathway?hsa00030+hsa:9104+hsa:8277+hsa:132158
hsa00040	Pentose and glucuronate interconversions	3	1268	26	7681	0.827498	1	0.115385	ENSG00000135226(UGT2B28)|ENSG00000214960(CRPPA)|ENSG00000197888(UGT2B17)	hsa:54490|hsa:729920|hsa:7367	http://www.kegg.jp/kegg-bin/show_pathway?hsa00040+hsa:54490+hsa:729920+hsa:7367
hsa00051	Fructose and mannose metabolism	2	1268	33	7681	0.980649	1	0.0606061	ENSG00000112699(GMDS)|ENSG00000156510(HKDC1)	hsa:2762|hsa:80201	http://www.kegg.jp/kegg-bin/show_pathway?hsa00051+hsa:2762+hsa:80201
hsa00052	Galactose metabolism	3	1268	29	7681	0.879717	1	0.103448	ENSG00000257743(MGAM2)|ENSG00000257335(MGAM)|ENSG00000156510(HKDC1)	hsa:93432|hsa:8972|hsa:80201	http://www.kegg.jp/kegg-bin/show_pathway?hsa00052+hsa:93432+hsa:8972+hsa:80201
hsa00053	Ascorbate and aldarate metabolism	3	1268	21	7681	0.698095	1	0.142857	ENSG00000130988(RGN)|ENSG00000135226(UGT2B28)|ENSG00000197888(UGT2B17)	hsa:9104|hsa:54490|hsa:7367	http://www.kegg.jp/kegg-bin/show_pathway?hsa00053+hsa:9104+hsa:54490+hsa:7367
hsa00061	Fatty acid biosynthesis	2	1268	18	7681	0.823135	1	0.111111	ENSG00000103740(ACSBG1)|ENSG00000176715(ACSF3)	hsa:23205|hsa:197322	http://www.kegg.jp/kegg-bin/show_pathway?hsa00061+hsa:23205+hsa:197322
hsa00071	Fatty acid degradation	1	1268	41	7681	0.9994	1	0.0243902	ENSG00000103740(ACSBG1)	hsa:23205	http://www.kegg.jp/kegg-bin/show_pathway?hsa00071+hsa:23205
hsa00130	Ubiquinone and other terpenoid-quinone biosynthesis	1	1268	12	7681	0.885453	1	0.0833333	ENSG00000198650(TAT)	hsa:6898	http://www.kegg.jp/kegg-bin/show_pathway?hsa00130+hsa:6898
hsa00140	Steroid hormone biosynthesis	4	1268	54	7681	0.985029	1	0.0740741	ENSG00000140505(CYP1A2)|ENSG00000140459(CYP11A1)|ENSG00000135226(UGT2B28)|ENSG00000197888(UGT2B17)	hsa:1544|hsa:1583|hsa:54490|hsa:7367	http://www.kegg.jp/kegg-bin/show_pathway?hsa00140+hsa:1544+hsa:1583+hsa:54490+hsa:7367
hsa00190	Oxidative phosphorylation	15	1268	133	7681	0.965765	1	0.112782	ENSG00000198888(MT-ND1)|ENSG00000198763(MT-ND2)|ENSG00000198804(MT-CO1)|ENSG00000228253(MT-ATP8)|ENSG00000198899(MT-ATP6)|ENSG00000198840(MT-ND3)|ENSG00000198886(MT-ND4)|ENSG00000198786(MT-ND5)|ENSG00000198727(MT-CYB)|ENSG00000178127(NDUFV2)|ENSG00000075673(ATP12A)|ENSG00000105929(ATP6V0A4)|ENSG00000213760(ATP6V1G2)|ENSG00000171130(ATP6V0E2)|ENSG00000151418(ATP6V1G3)	hsa:4535|hsa:4536|hsa:4512|hsa:4509|hsa:4508|hsa:4537|hsa:4538|hsa:4540|hsa:4519|hsa:4729|hsa:479|hsa:50617|hsa:534|hsa:155066|hsa:127124	http://www.kegg.jp/kegg-bin/show_pathway?hsa00190+hsa:4535+hsa:4536+hsa:4512+hsa:4509+hsa:4508+hsa:4537+hsa:4538+hsa:4540+hsa:4519+hsa:4729+hsa:479+hsa:50617+hsa:534+hsa:155066+hsa:127124
hsa00220	Arginine biosynthesis	2	1268	22	7681	0.89929	1	0.0909091	ENSG00000118520(ARG1)|ENSG00000081181(ARG2)	hsa:383|hsa:384	http://www.kegg.jp/kegg-bin/show_pathway?hsa00220+hsa:383+hsa:384
hsa00250	Alanine, aspartate and glutamate metabolism	1	1268	34	7681	0.997864	1	0.0294118	ENSG00000131459(GFPT2)	hsa:9945	http://www.kegg.jp/kegg-bin/show_pathway?hsa00250+hsa:9945
hsa00260	Glycine, serine and threonine metabolism	5	1268	38	7681	0.775286	1	0.131579	ENSG00000123453(SARDH)|ENSG00000158578(ALAS2)|ENSG00000178445(GLDC)|ENSG00000168237(GLYCTK)|ENSG00000092621(PHGDH)	hsa:1757|hsa:212|hsa:2731|hsa:132158|hsa:26227	http://www.kegg.jp/kegg-bin/show_pathway?hsa00260+hsa:1757+hsa:212+hsa:2731+hsa:132158+hsa:26227
hsa00270	Cysteine and methionine metabolism	6	1268	52	7681	0.88012	1	0.115385	ENSG00000166796(LDHC)|ENSG00000132840(BHMT2)|ENSG00000198650(TAT)|ENSG00000092621(PHGDH)|ENSG00000116984(MTR)|ENSG00000119772(DNMT3A)	hsa:3948|hsa:23743|hsa:6898|hsa:26227|hsa:4548|hsa:1788	http://www.kegg.jp/kegg-bin/show_pathway?hsa00270+hsa:3948+hsa:23743+hsa:6898+hsa:26227+hsa:4548+hsa:1788
hsa00280	Valine, leucine and isoleucine degradation	3	1268	48	7681	0.990695	1	0.0625	ENSG00000083720(OXCT1)|ENSG00000176715(ACSF3)|ENSG00000131844(MCCC2)	hsa:5019|hsa:197322|hsa:64087	http://www.kegg.jp/kegg-bin/show_pathway?hsa00280+hsa:5019+hsa:197322+hsa:64087
hsa00330	Arginine and proline metabolism	4	1268	48	7681	0.96775	1	0.0833333	ENSG00000116771(AGMAT)|ENSG00000118520(ARG1)|ENSG00000081181(ARG2)|ENSG00000172508(CARNS1)	hsa:79814|hsa:383|hsa:384|hsa:57571	http://www.kegg.jp/kegg-bin/show_pathway?hsa00330+hsa:79814+hsa:383+hsa:384+hsa:57571
hsa00340	Histidine metabolism	2	1268	21	7681	0.883789	1	0.0952381	ENSG00000140287(HDC)|ENSG00000172508(CARNS1)	hsa:3067|hsa:57571	http://www.kegg.jp/kegg-bin/show_pathway?hsa00340+hsa:3067+hsa:57571
hsa00350	Tyrosine metabolism	4	1268	32	7681	0.798319	1	0.125	ENSG00000115705(TPO)|ENSG00000123454(DBH)|ENSG00000113924(HGD)|ENSG00000198650(TAT)	hsa:7173|hsa:1621|hsa:3081|hsa:6898	http://www.kegg.jp/kegg-bin/show_pathway?hsa00350+hsa:7173+hsa:1621+hsa:3081+hsa:6898
hsa00360	Phenylalanine metabolism	1	1268	16	7681	0.944416	1	0.0625	ENSG00000198650(TAT)	hsa:6898	http://www.kegg.jp/kegg-bin/show_pathway?hsa00360+hsa:6898
hsa00380	Tryptophan metabolism	5	1268	43	7681	0.860237	1	0.116279	ENSG00000241644(INMT)|ENSG00000140505(CYP1A2)|ENSG00000139287(TPH2)|ENSG00000118514(ALDH8A1)|ENSG00000129167(TPH1)	hsa:11185|hsa:1544|hsa:121278|hsa:64577|hsa:7166	http://www.kegg.jp/kegg-bin/show_pathway?hsa00380+hsa:11185+hsa:1544+hsa:121278+hsa:64577+hsa:7166
hsa00400	Phenylalanine, tyrosine and tryptophan biosynthesis	1	1268	6	7681	0.661395	1	0.166667	ENSG00000198650(TAT)	hsa:6898	http://www.kegg.jp/kegg-bin/show_pathway?hsa00400+hsa:6898
hsa00410	beta-Alanine metabolism	2	1268	31	7681	0.973665	1	0.0645161	ENSG00000100024(UPB1)|ENSG00000172508(CARNS1)	hsa:51733|hsa:57571	http://www.kegg.jp/kegg-bin/show_pathway?hsa00410+hsa:51733+hsa:57571
hsa00430	Taurine and hypotaurine metabolism	1	1268	16	7681	0.944416	1	0.0625	ENSG00000094963(FMO2)	hsa:2327	http://www.kegg.jp/kegg-bin/show_pathway?hsa00430+hsa:2327
hsa00440	Phosphonate and phosphinate metabolism	1	1268	6	7681	0.661395	1	0.166667	ENSG00000102230(PCYT1B)	hsa:9468	http://www.kegg.jp/kegg-bin/show_pathway?hsa00440+hsa:9468
hsa00480	Glutathione metabolism	8	1268	53	7681	0.666409	1	0.150943	ENSG00000164294(GPX8)|ENSG00000116157(GPX7)|ENSG00000134201(GSTM5)|ENSG00000213366(GSTM2)|ENSG00000134184(GSTM1)|ENSG00000243955(GSTA1)|ENSG00000176153(GPX2)|ENSG00000171848(RRM2)	hsa:493869|hsa:2882|hsa:2949|hsa:2946|hsa:2944|hsa:2938|hsa:2877|hsa:6241	http://www.kegg.jp/kegg-bin/show_pathway?hsa00480+hsa:493869+hsa:2882+hsa:2949+hsa:2946+hsa:2944+hsa:2938+hsa:2877+hsa:6241
hsa00510	N-Glycan biosynthesis	4	1268	54	7681	0.985029	1	0.0740741	ENSG00000182858(ALG12)|ENSG00000033170(FUT8)|ENSG00000144057(ST6GAL2)|ENSG00000073849(ST6GAL1)	hsa:79087|hsa:2530|hsa:84620|hsa:6480	http://www.kegg.jp/kegg-bin/show_pathway?hsa00510+hsa:79087+hsa:2530+hsa:84620+hsa:6480
hsa00511	Other glycan degradation	2	1268	17	7681	0.797293	1	0.117647	ENSG00000104774(MAN2B1)|ENSG00000204099(NEU4)	hsa:4125|hsa:129807	http://www.kegg.jp/kegg-bin/show_pathway?hsa00511+hsa:4125+hsa:129807
hsa00513	Various types of N-glycan biosynthesis	3	1268	42	7681	0.97827	1	0.0714286	ENSG00000182858(ALG12)|ENSG00000033170(FUT8)|ENSG00000182272(B4GALNT4)	hsa:79087|hsa:2530|hsa:338707	http://www.kegg.jp/kegg-bin/show_pathway?hsa00513+hsa:79087+hsa:2530+hsa:338707
hsa00520	Amino sugar and nucleotide sugar metabolism	2	1268	38	7681	0.991151	1	0.0526316	ENSG00000131459(GFPT2)|ENSG00000156510(HKDC1)	hsa:9945|hsa:80201	http://www.kegg.jp/kegg-bin/show_pathway?hsa00520+hsa:9945+hsa:80201
hsa00533	Glycosaminoglycan biosynthesis - keratan sulfate	2	1268	13	7681	0.658182	1	0.153846	ENSG00000033170(FUT8)|ENSG00000170340(B3GNT2)	hsa:2530|hsa:10678	http://www.kegg.jp/kegg-bin/show_pathway?hsa00533+hsa:2530+hsa:10678
hsa00534	Glycosaminoglycan biosynthesis - heparan sulfate / heparin	3	1268	24	7681	0.782738	1	0.125	ENSG00000171004(HS6ST2)|ENSG00000166507(NDST2)|ENSG00000182197(EXT1)	hsa:90161|hsa:8509|hsa:2131	http://www.kegg.jp/kegg-bin/show_pathway?hsa00534+hsa:90161+hsa:8509+hsa:2131
hsa00541	Biosynthesis of various nucleotide sugars	1	1268	19	7681	0.967692	1	0.0526316	ENSG00000112699(GMDS)	hsa:2762	http://www.kegg.jp/kegg-bin/show_pathway?hsa00541+hsa:2762
hsa00561	Glycerolipid metabolism	6	1268	60	7681	0.946126	1	0.1	ENSG00000166035(LIPC)|ENSG00000006530(AGK)|ENSG00000065357(DGKA)|ENSG00000168237(GLYCTK)|ENSG00000134324(LPIN1)|ENSG00000077044(DGKD)	hsa:3990|hsa:55750|hsa:1606|hsa:132158|hsa:23175|hsa:8527	http://www.kegg.jp/kegg-bin/show_pathway?hsa00561+hsa:3990+hsa:55750+hsa:1606+hsa:132158+hsa:23175+hsa:8527
hsa00563	Glycosylphosphatidylinositol (GPI)-anchor biosynthesis	2	1268	29	7681	0.964273	1	0.0689655	ENSG00000112293(GPLD1)|ENSG00000197121(PGAP1)	hsa:2822|hsa:80055	http://www.kegg.jp/kegg-bin/show_pathway?hsa00563+hsa:2822+hsa:80055
hsa00564	Glycerophospholipid metabolism	11	1268	99	7681	0.950464	1	0.111111	ENSG00000153395(LPCAT1)|ENSG00000144837(PLA1A)|ENSG00000166428(PLD4)|ENSG00000163803(PLB1)|ENSG00000102230(PCYT1B)|ENSG00000065357(DGKA)|ENSG00000133328(PLAAT2)|ENSG00000143845(ETNK2)|ENSG00000173868(PHOSPHO1)|ENSG00000134324(LPIN1)|ENSG00000077044(DGKD)	hsa:79888|hsa:51365|hsa:122618|hsa:151056|hsa:9468|hsa:1606|hsa:54979|hsa:55224|hsa:162466|hsa:23175|hsa:8527	http://www.kegg.jp/kegg-bin/show_pathway?hsa00564+hsa:79888+hsa:51365+hsa:122618+hsa:151056+hsa:9468+hsa:1606+hsa:54979+hsa:55224+hsa:162466+hsa:23175+hsa:8527
hsa00565	Ether lipid metabolism	6	1268	46	7681	0.794033	1	0.130435	ENSG00000153395(LPCAT1)|ENSG00000166428(PLD4)|ENSG00000174607(UGT8)|ENSG00000163803(PLB1)|ENSG00000136960(ENPP2)|ENSG00000133328(PLAAT2)	hsa:79888|hsa:122618|hsa:7368|hsa:151056|hsa:5168|hsa:54979	http://www.kegg.jp/kegg-bin/show_pathway?hsa00565+hsa:79888+hsa:122618+hsa:7368+hsa:151056+hsa:5168+hsa:54979
hsa00592	alpha-Linolenic acid metabolism	2	1268	23	7681	0.912844	1	0.0869565	ENSG00000163803(PLB1)|ENSG00000133328(PLAAT2)	hsa:151056|hsa:54979	http://www.kegg.jp/kegg-bin/show_pathway?hsa00592+hsa:151056+hsa:54979
hsa00600	Sphingolipid metabolism	5	1268	53	7681	0.951748	1	0.0943396	ENSG00000172296(SPTLC3)|ENSG00000174607(UGT8)|ENSG00000103056(SMPD3)|ENSG00000154227(CERS3)|ENSG00000204099(NEU4)	hsa:55304|hsa:7368|hsa:55512|hsa:204219|hsa:129807	http://www.kegg.jp/kegg-bin/show_pathway?hsa00600+hsa:55304+hsa:7368+hsa:55512+hsa:204219+hsa:129807
hsa00601	Glycosphingolipid biosynthesis - lacto and neolacto series	4	1268	27	7681	0.673453	1	0.148148	ENSG00000175164(ABO)|ENSG00000110080(ST3GAL4)|ENSG00000172318(B3GALT1)|ENSG00000170340(B3GNT2)	hsa:28|hsa:6484|hsa:8708|hsa:10678	http://www.kegg.jp/kegg-bin/show_pathway?hsa00601+hsa:28+hsa:6484+hsa:8708+hsa:10678
hsa00603	Glycosphingolipid biosynthesis - globo and isoglobo series	1	1268	15	7681	0.9334	1	0.0666667	ENSG00000175164(ABO)	hsa:28	http://www.kegg.jp/kegg-bin/show_pathway?hsa00603+hsa:28
hsa00620	Pyruvate metabolism	2	1268	44	7681	0.996603	1	0.0454545	ENSG00000154930(ACSS1)|ENSG00000166796(LDHC)	hsa:84532|hsa:3948	http://www.kegg.jp/kegg-bin/show_pathway?hsa00620+hsa:84532+hsa:3948
hsa00630	Glyoxylate and dicarboxylate metabolism	3	1268	28	7681	0.864113	1	0.107143	ENSG00000154930(ACSS1)|ENSG00000178445(GLDC)|ENSG00000168237(GLYCTK)	hsa:84532|hsa:2731|hsa:132158	http://www.kegg.jp/kegg-bin/show_pathway?hsa00630+hsa:84532+hsa:2731+hsa:132158
hsa00640	Propanoate metabolism	2	1268	32	7681	0.977417	1	0.0625	ENSG00000154930(ACSS1)|ENSG00000166796(LDHC)	hsa:84532|hsa:3948	http://www.kegg.jp/kegg-bin/show_pathway?hsa00640+hsa:84532+hsa:3948
hsa00650	Butanoate metabolism	1	1268	27	7681	0.992407	1	0.037037	ENSG00000083720(OXCT1)	hsa:5019	http://www.kegg.jp/kegg-bin/show_pathway?hsa00650+hsa:5019
hsa00670	One carbon pool by folate	4	1268	36	7681	0.867751	1	0.111111	ENSG00000123453(SARDH)|ENSG00000132840(BHMT2)|ENSG00000178445(GLDC)|ENSG00000116984(MTR)	hsa:1757|hsa:23743|hsa:2731|hsa:4548	http://www.kegg.jp/kegg-bin/show_pathway?hsa00670+hsa:1757+hsa:23743+hsa:2731+hsa:4548
hsa00730	Thiamine metabolism	2	1268	13	7681	0.658182	1	0.153846	ENSG00000162551(ALPL)|ENSG00000154027(AK5)	hsa:249|hsa:26289	http://www.kegg.jp/kegg-bin/show_pathway?hsa00730+hsa:249+hsa:26289
hsa00750	Vitamin B6 metabolism	1	1268	6	7681	0.661395	1	0.166667	ENSG00000241360(PDXP)	hsa:57026	http://www.kegg.jp/kegg-bin/show_pathway?hsa00750+hsa:57026
hsa00785	Lipoic acid metabolism	1	1268	18	7681	0.961286	1	0.0555556	ENSG00000178445(GLDC)	hsa:2731	http://www.kegg.jp/kegg-bin/show_pathway?hsa00785+hsa:2731
hsa00790	Folate biosynthesis	3	1268	24	7681	0.782738	1	0.125	ENSG00000139287(TPH2)|ENSG00000162551(ALPL)|ENSG00000129167(TPH1)	hsa:121278|hsa:249|hsa:7166	http://www.kegg.jp/kegg-bin/show_pathway?hsa00790+hsa:121278+hsa:249+hsa:7166
hsa00860	Porphyrin metabolism	3	1268	36	7681	0.950902	1	0.0833333	ENSG00000135226(UGT2B28)|ENSG00000158578(ALAS2)|ENSG00000197888(UGT2B17)	hsa:54490|hsa:212|hsa:7367	http://www.kegg.jp/kegg-bin/show_pathway?hsa00860+hsa:54490+hsa:212+hsa:7367
hsa00900	Terpenoid backbone biosynthesis	1	1268	23	7681	0.984334	1	0.0434783	ENSG00000148459(PDSS1)	hsa:23590	http://www.kegg.jp/kegg-bin/show_pathway?hsa00900+hsa:23590
hsa00920	Sulfur metabolism	1	1268	10	7681	0.835589	1	0.1	ENSG00000143416(SELENBP1)	hsa:8991	http://www.kegg.jp/kegg-bin/show_pathway?hsa00920+hsa:8991
hsa00970	Aminoacyl-tRNA biosynthesis	1	1268	44	7681	0.999652	1	0.0227273	ENSG00000112855(HARS2)	hsa:23438	http://www.kegg.jp/kegg-bin/show_pathway?hsa00970+hsa:23438
hsa00980	Metabolism of xenobiotics by cytochrome P450	9	1268	63	7681	0.73391	1	0.142857	ENSG00000140505(CYP1A2)|ENSG00000135226(UGT2B28)|ENSG00000197446(CYP2F1)|ENSG00000134201(GSTM5)|ENSG00000213366(GSTM2)|ENSG00000134184(GSTM1)|ENSG00000243955(GSTA1)|ENSG00000138109(CYP2C9)|ENSG00000197888(UGT2B17)	hsa:1544|hsa:54490|hsa:1572|hsa:2949|hsa:2946|hsa:2944|hsa:2938|hsa:1559|hsa:7367	http://www.kegg.jp/kegg-bin/show_pathway?hsa00980+hsa:1544+hsa:54490+hsa:1572+hsa:2949+hsa:2946+hsa:2944+hsa:2938+hsa:1559+hsa:7367
hsa00983	Drug metabolism - other enzymes	9	1268	67	7681	0.798459	1	0.134328	ENSG00000100024(UPB1)|ENSG00000135226(UGT2B28)|ENSG00000134201(GSTM5)|ENSG00000213366(GSTM2)|ENSG00000134184(GSTM1)|ENSG00000243955(GSTA1)|ENSG00000197888(UGT2B17)|ENSG00000167900(TK1)|ENSG00000171848(RRM2)	hsa:51733|hsa:54490|hsa:2949|hsa:2946|hsa:2944|hsa:2938|hsa:7367|hsa:7083|hsa:6241	http://www.kegg.jp/kegg-bin/show_pathway?hsa00983+hsa:51733+hsa:54490+hsa:2949+hsa:2946+hsa:2944+hsa:2938+hsa:7367+hsa:7083+hsa:6241
hsa01040	Biosynthesis of unsaturated fatty acids	2	1268	27	7681	0.951704	1	0.0740741	ENSG00000118402(ELOVL4)|ENSG00000170522(ELOVL6)	hsa:6785|hsa:79071	http://www.kegg.jp/kegg-bin/show_pathway?hsa01040+hsa:6785+hsa:79071
hsa01100	Metabolic pathways	200	1268	1499	7681	0.999926	1	0.133422	ENSG00000198888(MT-ND1)|ENSG00000198763(MT-ND2)|ENSG00000198804(MT-CO1)|ENSG00000228253(MT-ATP8)|ENSG00000198899(MT-ATP6)|ENSG00000198840(MT-ND3)|ENSG00000198886(MT-ND4)|ENSG00000198786(MT-ND5)|ENSG00000198727(MT-CYB)|ENSG00000178127(NDUFV2)|ENSG00000172296(SPTLC3)|ENSG00000241360(PDXP)|ENSG00000130988(RGN)|ENSG00000182858(ALG12)|ENSG00000124212(PTGIS)|ENSG00000182621(PLCB1)|ENSG00000160191(PDE9A…	hsa:4535|hsa:4536|hsa:4512|hsa:4509|hsa:4508|hsa:4537|hsa:4538|hsa:4540|hsa:4519|hsa:4729|hsa:55304|hsa:57026|hsa:9104|hsa:79087|hsa:5740|hsa:23236|hsa:5152|hsa:479|hsa:374378|hsa:84444|hsa:2762|hsa:84532|hsa:51733|hsa:55790|hsa:8897|hsa:57452|hsa:730249|hsa:29906|hsa:11185|hsa:107|hsa:2984|hsa:3948|hsa:956|hsa:2530|hsa:9249|hsa:765|hsa:79888|hsa:5140|hsa:5293|hsa:8395|hsa:2053|hsa:7799|hsa:8277|…	http://www.kegg.jp/kegg-bin/show_pathway?hsa01100+hsa:4535+hsa:4536+hsa:4512+hsa:4509+hsa:4508+hsa:4537+hsa:4538+hsa:4540+hsa:4519+hsa:4729+hsa:55304+hsa:57026+hsa:9104+hsa:79087+hsa:5740+hsa:23236+hsa:5152+hsa:479+hsa:374378+hsa:84444+hsa:2762+hsa:84532+hsa:51733+hsa:55790+hsa:8897+hsa:57452+hsa:730249+hsa:29906+hsa:11185+hsa:107+hsa:2984+hsa:3948+hsa:956+hsa:2530+hsa:9249+hsa:765+hsa:79888+hsa:…
hsa01200	Carbon metabolism	7	1268	111	7681	0.999655	1	0.0630631	ENSG00000130988(RGN)|ENSG00000154930(ACSS1)|ENSG00000007350(TKTL1)|ENSG00000178445(GLDC)|ENSG00000156510(HKDC1)|ENSG00000168237(GLYCTK)|ENSG00000092621(PHGDH)	hsa:9104|hsa:84532|hsa:8277|hsa:2731|hsa:80201|hsa:132158|hsa:26227	http://www.kegg.jp/kegg-bin/show_pathway?hsa01200+hsa:9104+hsa:84532+hsa:8277+hsa:2731+hsa:80201+hsa:132158+hsa:26227
hsa01212	Fatty acid metabolism	5	1268	57	7681	0.969535	1	0.0877193	ENSG00000118402(ELOVL4)|ENSG00000103740(ACSBG1)|ENSG00000176715(ACSF3)|ENSG00000170522(ELOVL6)|ENSG00000221988(PPT2)	hsa:6785|hsa:23205|hsa:197322|hsa:79071|hsa:9374	http://www.kegg.jp/kegg-bin/show_pathway?hsa01212+hsa:6785+hsa:23205+hsa:197322+hsa:79071+hsa:9374
hsa01230	Biosynthesis of amino acids	5	1268	72	7681	0.995243	1	0.0694444	ENSG00000007350(TKTL1)|ENSG00000118520(ARG1)|ENSG00000081181(ARG2)|ENSG00000092621(PHGDH)|ENSG00000116984(MTR)	hsa:8277|hsa:383|hsa:384|hsa:26227|hsa:4548	http://www.kegg.jp/kegg-bin/show_pathway?hsa01230+hsa:8277+hsa:383+hsa:384+hsa:26227+hsa:4548
hsa01232	Nucleotide metabolism	12	1268	82	7681	0.721632	1	0.146341	ENSG00000168032(ENTPD3)|ENSG00000185013(NT5C1B)|ENSG00000171793(CTPS1)|ENSG00000154027(AK5)|ENSG00000154269(ENPP3)|ENSG00000205309(NT5M)|ENSG00000122643(NT5C3A)|ENSG00000197594(ENPP1)|ENSG00000167900(TK1)|ENSG00000135318(NT5E)|ENSG00000171848(RRM2)|ENSG00000116981(NT5C1A)	hsa:956|hsa:93034|hsa:1503|hsa:26289|hsa:5169|hsa:56953|hsa:51251|hsa:5167|hsa:7083|hsa:4907|hsa:6241|hsa:84618	http://www.kegg.jp/kegg-bin/show_pathway?hsa01232+hsa:956+hsa:93034+hsa:1503+hsa:26289+hsa:5169+hsa:56953+hsa:51251+hsa:5167+hsa:7083+hsa:4907+hsa:6241+hsa:84618
hsa01240	Biosynthesis of cofactors	11	1268	141	7681	0.999275	1	0.0780142	ENSG00000241360(PDXP)|ENSG00000130988(RGN)|ENSG00000162496(DHRS3)|ENSG00000171793(CTPS1)|ENSG00000135226(UGT2B28)|ENSG00000162551(ALPL)|ENSG00000158578(ALAS2)|ENSG00000154027(AK5)|ENSG00000170786(SDR16C5)|ENSG00000152782(PANK1)|ENSG00000197888(UGT2B17)	hsa:57026|hsa:9104|hsa:9249|hsa:1503|hsa:54490|hsa:249|hsa:212|hsa:26289|hsa:195814|hsa:53354|hsa:7367	http://www.kegg.jp/kegg-bin/show_pathway?hsa01240+hsa:57026+hsa:9104+hsa:9249+hsa:1503+hsa:54490+hsa:249+hsa:212+hsa:26289+hsa:195814+hsa:53354+hsa:7367
hsa01250	Biosynthesis of nucleotide sugars	3	1268	37	7681	0.957025	1	0.0810811	ENSG00000112699(GMDS)|ENSG00000131459(GFPT2)|ENSG00000156510(HKDC1)	hsa:2762|hsa:9945|hsa:80201	http://www.kegg.jp/kegg-bin/show_pathway?hsa01250+hsa:2762+hsa:9945+hsa:80201
hsa03008	Ribosome biogenesis in eukaryotes	6	1268	78	7681	0.99304	1	0.0769231	ENSG00000112159(MDN1)|ENSG00000105202(FBL)|ENSG00000055044(NOP58)|ENSG00000079313(REXO1)|ENSG00000134987(WDR36)|ENSG00000119285(HEATR1)	hsa:23195|hsa:2091|hsa:51602|hsa:57455|hsa:134430|hsa:55127	http://www.kegg.jp/kegg-bin/show_pathway?hsa03008+hsa:23195+hsa:2091+hsa:51602+hsa:57455+hsa:134430+hsa:55127
hsa03010	Ribosome	7	1268	132	7681	0.99998	1	0.0530303	ENSG00000100316(RPL3)|ENSG00000198034(RPS4X)|ENSG00000071082(RPL31)|ENSG00000145425(RPS3A)|ENSG00000144713(RPL32)|ENSG00000164587(RPS14)|ENSG00000231500(RPS18)	hsa:6122|hsa:6191|hsa:6160|hsa:6189|hsa:6161|hsa:6208|hsa:6222	http://www.kegg.jp/kegg-bin/show_pathway?hsa03010+hsa:6122+hsa:6191+hsa:6160+hsa:6189+hsa:6161+hsa:6208+hsa:6222
hsa03013	Nucleocytoplasmic transport	9	1268	106	7681	0.994636	1	0.0849057	ENSG00000065150(IPO5)|ENSG00000108559(NUP88)|ENSG00000170935(NCBP2L)|ENSG00000030066(NUP160)|ENSG00000132182(NUP210)|ENSG00000177688(SUMO4)|ENSG00000124789(NUP153)|ENSG00000169180(XPO6)|ENSG00000198563(DDX39B)	hsa:3843|hsa:4927|hsa:392517|hsa:23279|hsa:23225|hsa:387082|hsa:9972|hsa:23214|hsa:7919	http://www.kegg.jp/kegg-bin/show_pathway?hsa03013+hsa:3843+hsa:4927+hsa:392517+hsa:23279+hsa:23225+hsa:387082+hsa:9972+hsa:23214+hsa:7919
hsa03015	mRNA surveillance pathway	8	1268	93	7681	0.991083	1	0.0860215	ENSG00000218823(PAPOLB)|ENSG00000170935(NCBP2L)|ENSG00000151846(PABPC3)|ENSG00000177613(CSTF2T)|ENSG00000198563(DDX39B)|ENSG00000070756(PABPC1)|ENSG00000164091(WDR82)|ENSG00000153944(MSI2)	hsa:56903|hsa:392517|hsa:5042|hsa:23283|hsa:7919|hsa:26986|hsa:80335|hsa:124540	http://www.kegg.jp/kegg-bin/show_pathway?hsa03015+hsa:56903+hsa:392517+hsa:5042+hsa:23283+hsa:7919+hsa:26986+hsa:80335+hsa:124540
hsa03018	RNA degradation	7	1268	76	7681	0.976908	1	0.0921053	ENSG00000151846(PABPC3)|ENSG00000110367(DDX6)|ENSG00000138035(PNPT1)|ENSG00000080802(CNOT4)|ENSG00000070756(PABPC1)|ENSG00000121274(TENT4B)|ENSG00000138767(CNOT6L)	hsa:5042|hsa:1656|hsa:87178|hsa:4850|hsa:26986|hsa:64282|hsa:246175	http://www.kegg.jp/kegg-bin/show_pathway?hsa03018+hsa:5042+hsa:1656+hsa:87178+hsa:4850+hsa:26986+hsa:64282+hsa:246175
hsa03020	RNA polymerase	1	1268	34	7681	0.997864	1	0.0294118	ENSG00000058600(POLR3E)	hsa:55718	http://www.kegg.jp/kegg-bin/show_pathway?hsa03020+hsa:55718
hsa03022	Basal transcription factors	2	1268	43	7681	0.996011	1	0.0465116	ENSG00000141384(TAF4B)|ENSG00000270647(TAF15)	hsa:6875|hsa:8148	http://www.kegg.jp/kegg-bin/show_pathway?hsa03022+hsa:6875+hsa:8148
hsa03030	DNA replication	4	1268	36	7681	0.867751	1	0.111111	ENSG00000204086(RPA4)|ENSG00000166508(MCM7)|ENSG00000076003(MCM6)|ENSG00000132383(RPA1)	hsa:29935|hsa:4176|hsa:4175|hsa:6117	http://www.kegg.jp/kegg-bin/show_pathway?hsa03030+hsa:29935+hsa:4176+hsa:4175+hsa:6117
hsa03040	Spliceosome	13	1268	152	7681	0.998619	1	0.0855263	ENSG00000160201(U2AF1)|ENSG00000170935(NCBP2L)|ENSG00000104897(SF3A2)|ENSG00000207357(RNU6-2)|ENSG00000092199(HNRNPC)|ENSG00000198563(DDX39B)|ENSG00000161265(U2AF1L4)|ENSG00000277610(RNVU1-4)|ENSG00000277610(RNVU1-4)|ENSG00000201183(RNVU1-3)|ENSG00000207205(RNVU1-15)|ENSG00000113649(TCERG1)|ENSG00000199377(RNU5F-1)	hsa:7307|hsa:392517|hsa:8175|hsa:103625684|hsa:3183|hsa:7919|hsa:199746|hsa:101954264|hsa:101954268|hsa:101954272|hsa:101954267|hsa:10915|hsa:26828	http://www.kegg.jp/kegg-bin/show_pathway?hsa03040+hsa:7307+hsa:392517+hsa:8175+hsa:103625684+hsa:3183+hsa:7919+hsa:199746+hsa:101954264+hsa:101954268+hsa:101954272+hsa:101954267+hsa:10915+hsa:26828
hsa03050	Proteasome	2	1268	46	7681	0.99754	1	0.0434783	ENSG00000068878(PSME4)|ENSG00000106588(PSMA2)	hsa:23198|hsa:5683	http://www.kegg.jp/kegg-bin/show_pathway?hsa03050+hsa:23198+hsa:5683
hsa03082	ATP-dependent chromatin remodeling	13	1268	111	7681	0.938576	1	0.117117	ENSG00000196787(H2AC11)|ENSG00000173473(SMARCC1)|ENSG00000066117(SMARCD1)|ENSG00000102038(SMARCA1)|ENSG00000130024(PHF10)|ENSG00000276368(H2AC14)|ENSG00000110987(BCL7A)|ENSG00000171634(BPTF)|ENSG00000205683(DPF3)|ENSG00000180573(H2AC6)|ENSG00000170004(CHD3)|ENSG00000258315(C17orf49)|ENSG00000181218(H2AW)	hsa:8969|hsa:6599|hsa:6602|hsa:6594|hsa:55274|hsa:8331|hsa:605|hsa:2186|hsa:8110|hsa:8334|hsa:1107|hsa:124944|hsa:92815	http://www.kegg.jp/kegg-bin/show_pathway?hsa03082+hsa:8969+hsa:6599+hsa:6602+hsa:6594+hsa:55274+hsa:8331+hsa:605+hsa:2186+hsa:8110+hsa:8334+hsa:1107+hsa:124944+hsa:92815
hsa03083	Polycomb repressive complex	13	1268	82	7681	0.610106	1	0.158537	ENSG00000171456(ASXL1)|ENSG00000102098(SCML2)|ENSG00000008083(JARID2)|ENSG00000141431(ASXL3)|ENSG00000185513(L3MBTL1)|ENSG00000158321(AUTS2)|ENSG00000198945(L3MBTL3)|ENSG00000119403(PHF19)|ENSG00000173894(CBX2)|ENSG00000125952(MAX)|ENSG00000178999(AURKB)|ENSG00000106462(EZH2)|ENSG00000204406(MBD5)	hsa:171023|hsa:10389|hsa:3720|hsa:80816|hsa:26013|hsa:26053|hsa:84456|hsa:26147|hsa:84733|hsa:4149|hsa:9212|hsa:2146|hsa:55777	http://www.kegg.jp/kegg-bin/show_pathway?hsa03083+hsa:171023+hsa:10389+hsa:3720+hsa:80816+hsa:26013+hsa:26053+hsa:84456+hsa:26147+hsa:84733+hsa:4149+hsa:9212+hsa:2146+hsa:55777
hsa03264	Virion - Flavivirus and Alphavirus	1	1268	6	7681	0.661395	1	0.166667	ENSG00000113249(HAVCR1)	hsa:26762	http://www.kegg.jp/kegg-bin/show_pathway?hsa03264+hsa:26762
hsa03265	Virion - Ebolavirus, Lyssavirus and Morbillivirus	1	1268	12	7681	0.885453	1	0.0833333	ENSG00000138435(CHRNA1)	hsa:1134	http://www.kegg.jp/kegg-bin/show_pathway?hsa03265+hsa:1134
hsa03272	Virion - Hepatitis viruses	6	1268	42	7681	0.714193	1	0.142857	ENSG00000134873(CLDN10)|ENSG00000184113(CLDN5)|ENSG00000119888(EPCAM)|ENSG00000171217(CLDN20)|ENSG00000013297(CLDN11)|ENSG00000142798(HSPG2)	hsa:9071|hsa:7122|hsa:4072|hsa:49861|hsa:5010|hsa:3339	http://www.kegg.jp/kegg-bin/show_pathway?hsa03272+hsa:9071+hsa:7122+hsa:4072+hsa:49861+hsa:5010+hsa:3339
hsa03320	PPAR signaling pathway	5	1268	70	7681	0.993843	1	0.0714286	ENSG00000165269(AQP7)|ENSG00000103740(ACSBG1)|ENSG00000166819(PLIN1)|ENSG00000180432(CYP8B1)|ENSG00000118137(APOA1)	hsa:364|hsa:23205|hsa:5346|hsa:1582|hsa:335	http://www.kegg.jp/kegg-bin/show_pathway?hsa03320+hsa:364+hsa:23205+hsa:5346+hsa:1582+hsa:335
hsa03410	Base excision repair	5	1268	44	7681	0.873537	1	0.113636	ENSG00000102699(PARP4)|ENSG00000140398(NEIL1)|ENSG00000109674(NEIL3)|ENSG00000154328(NEIL2)|ENSG00000132781(MUTYH)	hsa:143|hsa:79661|hsa:55247|hsa:252969|hsa:4595	http://www.kegg.jp/kegg-bin/show_pathway?hsa03410+hsa:143+hsa:79661+hsa:55247+hsa:252969+hsa:4595
hsa03420	Nucleotide excision repair	2	1268	62	7681	0.999823	1	0.0322581	ENSG00000204086(RPA4)|ENSG00000132383(RPA1)	hsa:29935|hsa:6117	http://www.kegg.jp/kegg-bin/show_pathway?hsa03420+hsa:29935+hsa:6117
hsa03440	Homologous recombination	6	1268	41	7681	0.691234	1	0.146341	ENSG00000204086(RPA4)|ENSG00000197275(RAD54B)|ENSG00000100038(TOP3B)|ENSG00000139351(SYCP3)|ENSG00000132383(RPA1)|ENSG00000149311(ATM)	hsa:29935|hsa:25788|hsa:8940|hsa:50511|hsa:6117|hsa:472	http://www.kegg.jp/kegg-bin/show_pathway?hsa03440+hsa:29935+hsa:25788+hsa:8940+hsa:50511+hsa:6117+hsa:472
hsa03450	Non-homologous end-joining	1	1268	13	7681	0.904392	1	0.0769231	ENSG00000107447(DNTT)	hsa:1791	http://www.kegg.jp/kegg-bin/show_pathway?hsa03450+hsa:1791
hsa03460	Fanconi anemia pathway	6	1268	53	7681	0.89103	1	0.113208	ENSG00000187790(FANCM)|ENSG00000204086(RPA4)|ENSG00000158169(FANCC)|ENSG00000100038(TOP3B)|ENSG00000175054(ATR)|ENSG00000132383(RPA1)	hsa:57697|hsa:29935|hsa:2176|hsa:8940|hsa:545|hsa:6117	http://www.kegg.jp/kegg-bin/show_pathway?hsa03460+hsa:57697+hsa:29935+hsa:2176+hsa:8940+hsa:545+hsa:6117
hsa04120	Ubiquitin mediated proteolysis	12	1268	140	7681	0.997959	1	0.0857143	ENSG00000160224(AIRE)|ENSG00000003096(KLHL13)|ENSG00000103657(HERC1)|ENSG00000175063(UBE2C)|ENSG00000114423(CBLB)|ENSG00000123124(WWP1)|ENSG00000101871(MID1)|ENSG00000185345(PRKN)|ENSG00000176248(ANAPC2)|ENSG00000138641(HERC3)|ENSG00000069869(NEDD4)|ENSG00000117399(CDC20)	hsa:326|hsa:90293|hsa:8925|hsa:11065|hsa:868|hsa:11059|hsa:4281|hsa:5071|hsa:29882|hsa:8916|hsa:4734|hsa:991	http://www.kegg.jp/kegg-bin/show_pathway?hsa04120+hsa:326+hsa:90293+hsa:8925+hsa:11065+hsa:868+hsa:11059+hsa:4281+hsa:5071+hsa:29882+hsa:8916+hsa:4734+hsa:991
hsa04130	SNARE interactions in vesicular transport	1	1268	33	7681	0.99744	1	0.030303	ENSG00000124222(STX16)	hsa:8675	http://www.kegg.jp/kegg-bin/show_pathway?hsa04130+hsa:8675
hsa04136	Autophagy - other	3	1268	31	7681	0.906217	1	0.0967742	ENSG00000181652(ATG9B)|ENSG00000141564(RPTOR)|ENSG00000198925(ATG9A)	hsa:285973|hsa:57521|hsa:79065	http://www.kegg.jp/kegg-bin/show_pathway?hsa04136+hsa:285973+hsa:57521+hsa:79065
hsa04137	Mitophagy - animal	8	1268	102	7681	0.99678	1	0.0784314	ENSG00000133818(RRAS2)|ENSG00000101412(E2F1)|ENSG00000185345(PRKN)|ENSG00000181652(ATG9B)|ENSG00000109339(MAPK10)|ENSG00000146574(CCZ1B)|ENSG00000100644(HIF1A)|ENSG00000198925(ATG9A)	hsa:22800|hsa:1869|hsa:5071|hsa:285973|hsa:5602|hsa:221960|hsa:3091|hsa:79065	http://www.kegg.jp/kegg-bin/show_pathway?hsa04137+hsa:22800+hsa:1869+hsa:5071+hsa:285973+hsa:5602+hsa:221960+hsa:3091+hsa:79065
hsa04140	Autophagy - animal	19	1268	164	7681	0.970396	1	0.115854	ENSG00000065675(PRKCQ)|ENSG00000133818(RRAS2)|ENSG00000100330(MTMR3)|ENSG00000171791(BCL2)|ENSG00000171608(PIK3CD)|ENSG00000023287(RB1CC1)|ENSG00000145675(PIK3R1)|ENSG00000110931(CAMKK2)|ENSG00000140443(IGF1R)|ENSG00000105221(AKT2)|ENSG00000181652(ATG9B)|ENSG00000141564(RPTOR)|ENSG00000145016(RUBCN)|ENSG00000168209(DDIT4)|ENSG00000109339(MAPK10)|ENSG00000175634(RPS6KB2)|ENSG00000100644(HIF1A)|ENS…	hsa:5588|hsa:22800|hsa:8897|hsa:596|hsa:5293|hsa:9821|hsa:5295|hsa:10645|hsa:3480|hsa:208|hsa:285973|hsa:57521|hsa:9711|hsa:54541|hsa:5602|hsa:6199|hsa:3091|hsa:5567|hsa:79065	http://www.kegg.jp/kegg-bin/show_pathway?hsa04140+hsa:5588+hsa:22800+hsa:8897+hsa:596+hsa:5293+hsa:9821+hsa:5295+hsa:10645+hsa:3480+hsa:208+hsa:285973+hsa:57521+hsa:9711+hsa:54541+hsa:5602+hsa:6199+hsa:3091+hsa:5567+hsa:79065
hsa04141	Protein processing in endoplasmic reticulum	6	1268	167	7681	1	1	0.0359281	ENSG00000171791(BCL2)|ENSG00000185345(PRKN)|ENSG00000176986(SEC24C)|ENSG00000109339(MAPK10)|ENSG00000075826(SEC31B)|ENSG00000213676(ATF6B)	hsa:596|hsa:5071|hsa:9632|hsa:5602|hsa:25956|hsa:1388	http://www.kegg.jp/kegg-bin/show_pathway?hsa04141+hsa:596+hsa:5071+hsa:9632+hsa:5602+hsa:25956+hsa:1388
hsa04142	Lysosome	8	1268	133	7681	0.999932	1	0.0601504	ENSG00000105929(ATP6V0A4)|ENSG00000100448(CTSG)|ENSG00000152056(AP1S3)|ENSG00000104774(MAN2B1)|ENSG00000174080(CTSF)|ENSG00000221988(PPT2)|ENSG00000172543(CTSW)|ENSG00000196188(CTSE)	hsa:50617|hsa:1511|hsa:130340|hsa:4125|hsa:8722|hsa:9374|hsa:1521|hsa:1510	http://www.kegg.jp/kegg-bin/show_pathway?hsa04142+hsa:50617+hsa:1511+hsa:130340+hsa:4125+hsa:8722+hsa:9374+hsa:1521+hsa:1510
hsa04144	Endocytosis	37	1268	248	7681	0.777774	1	0.149194	ENSG00000100055(CYTH4)|ENSG00000178184(PARD6G)|ENSG00000120645(IQSEC3)|ENSG00000147010(SH3KBP1)|ENSG00000078053(AMPH)|ENSG00000107242(PIP5K1B)|ENSG00000157978(LDLRAP1)|ENSG00000090565(RAB11FIP3)|ENSG00000013016(EHD3)|ENSG00000114423(CBLB)|ENSG00000198873(GRK5)|ENSG00000196814(MVB12B)|ENSG00000103966(EHD4)|ENSG00000123124(WWP1)|ENSG00000148498(PARD3)|ENSG00000059915(PSD)|ENSG00000163513(TGFBR2)|EN…	hsa:27128|hsa:84552|hsa:440073|hsa:30011|hsa:273|hsa:8395|hsa:26119|hsa:9727|hsa:30845|hsa:868|hsa:2869|hsa:89853|hsa:30844|hsa:11059|hsa:56288|hsa:5662|hsa:7048|hsa:57180|hsa:10938|hsa:3480|hsa:30846|hsa:3577|hsa:2350|hsa:29924|hsa:8729|hsa:155382|hsa:414189|hsa:26052|hsa:116987|hsa:2263|hsa:4088|hsa:4734|hsa:79720|hsa:9744|hsa:22905|hsa:64744|hsa:131890	http://www.kegg.jp/kegg-bin/show_pathway?hsa04144+hsa:27128+hsa:84552+hsa:440073+hsa:30011+hsa:273+hsa:8395+hsa:26119+hsa:9727+hsa:30845+hsa:868+hsa:2869+hsa:89853+hsa:30844+hsa:11059+hsa:56288+hsa:5662+hsa:7048+hsa:57180+hsa:10938+hsa:3480+hsa:30846+hsa:3577+hsa:2350+hsa:29924+hsa:8729+hsa:155382+hsa:414189+hsa:26052+hsa:116987+hsa:2263+hsa:4088+hsa:4734+hsa:79720+hsa:9744+hsa:22905+hsa:64744+hs…
hsa04145	Phagosome	20	1268	147	7681	0.858605	1	0.136054	ENSG00000178462(TUBAL3)|ENSG00000101162(TUBB1)|ENSG00000137801(THBS1)|ENSG00000198502(HLA-DRB5)|ENSG00000179344(HLA-DQB1)|ENSG00000118004(COLEC11)|ENSG00000164171(ITGA2)|ENSG00000186431(FCAR)|ENSG00000105929(ATP6V0A4)|ENSG00000102879(CORO1A)|ENSG00000133661(SFTPD)|ENSG00000213760(ATP6V1G2)|ENSG00000259207(ITGB3)|ENSG00000171130(ATP6V0E2)|ENSG00000151418(ATP6V1G3)|ENSG00000152086(TUBA3E)|ENSG00000…	hsa:79861|hsa:81027|hsa:7057|hsa:3127|hsa:3119|hsa:78989|hsa:3673|hsa:2204|hsa:50617|hsa:11151|hsa:6441|hsa:534|hsa:3690|hsa:155066|hsa:127124|hsa:112714|hsa:3693|hsa:2215|hsa:79659|hsa:7277	http://www.kegg.jp/kegg-bin/show_pathway?hsa04145+hsa:79861+hsa:81027+hsa:7057+hsa:3127+hsa:3119+hsa:78989+hsa:3673+hsa:2204+hsa:50617+hsa:11151+hsa:6441+hsa:534+hsa:3690+hsa:155066+hsa:127124+hsa:112714+hsa:3693+hsa:2215+hsa:79659+hsa:7277
hsa04146	Peroxisome	3	1268	81	7681	0.999939	1	0.037037	ENSG00000120915(EPHX2)|ENSG00000124587(PEX6)|ENSG00000173208(ABCD2)	hsa:2053|hsa:5190|hsa:225	http://www.kegg.jp/kegg-bin/show_pathway?hsa04146+hsa:2053+hsa:5190+hsa:225
hsa04152	AMPK signaling pathway	10	1268	118	7681	0.996386	1	0.0847458	ENSG00000171608(PIK3CD)|ENSG00000103319(EEF2K)|ENSG00000145675(PIK3R1)|ENSG00000110931(CAMKK2)|ENSG00000140443(IGF1R)|ENSG00000105221(AKT2)|ENSG00000141564(RPTOR)|ENSG00000266173(STRADA)|ENSG00000145386(CCNA2)|ENSG00000175634(RPS6KB2)	hsa:5293|hsa:29904|hsa:5295|hsa:10645|hsa:3480|hsa:208|hsa:57521|hsa:92335|hsa:890|hsa:6199	http://www.kegg.jp/kegg-bin/show_pathway?hsa04152+hsa:5293+hsa:29904+hsa:5295+hsa:10645+hsa:3480+hsa:208+hsa:57521+hsa:92335+hsa:890+hsa:6199
hsa04213	Longevity regulating pathway - multiple species	8	1268	59	7681	0.780372	1	0.135593	ENSG00000164742(ADCY1)|ENSG00000171608(PIK3CD)|ENSG00000145675(PIK3R1)|ENSG00000140443(IGF1R)|ENSG00000105221(AKT2)|ENSG00000141564(RPTOR)|ENSG00000175634(RPS6KB2)|ENSG00000142875(PRKACB)	hsa:107|hsa:5293|hsa:5295|hsa:3480|hsa:208|hsa:57521|hsa:6199|hsa:5567	http://www.kegg.jp/kegg-bin/show_pathway?hsa04213+hsa:107+hsa:5293+hsa:5295+hsa:3480+hsa:208+hsa:57521+hsa:6199+hsa:5567
hsa04216	Ferroptosis	2	1268	40	7681	0.993556	1	0.05	ENSG00000091513(TF)|ENSG00000138449(SLC40A1)	hsa:7018|hsa:30061	http://www.kegg.jp/kegg-bin/show_pathway?hsa04216+hsa:7018+hsa:30061
hsa04217	Necroptosis	22	1268	146	7681	0.715432	1	0.150685	ENSG00000124256(ZBP1)|ENSG00000196787(H2AC11)|ENSG00000171855(IFNB1)|ENSG00000171791(BCL2)|ENSG00000058404(CAMK2B)|ENSG00000121858(TNFSF10)|ENSG00000213928(IRF9)|ENSG00000118503(TNFAIP3)|ENSG00000125538(IL1B)|ENSG00000276368(H2AC14)|ENSG00000232810(TNF)|ENSG00000117560(FASLG)|ENSG00000105639(JAK3)|ENSG00000109339(MAPK10)|ENSG00000148660(CAMK2G)|ENSG00000137275(RIPK1)|ENSG00000147873(IFNA5)|ENSG00…	hsa:81030|hsa:8969|hsa:3456|hsa:596|hsa:816|hsa:8743|hsa:10379|hsa:7128|hsa:3553|hsa:8331|hsa:7124|hsa:356|hsa:3718|hsa:5602|hsa:818|hsa:8737|hsa:3442|hsa:6775|hsa:8334|hsa:114548|hsa:92815|hsa:5610	http://www.kegg.jp/kegg-bin/show_pathway?hsa04217+hsa:81030+hsa:8969+hsa:3456+hsa:596+hsa:816+hsa:8743+hsa:10379+hsa:7128+hsa:3553+hsa:8331+hsa:7124+hsa:356+hsa:3718+hsa:5602+hsa:818+hsa:8737+hsa:3442+hsa:6775+hsa:8334+hsa:114548+hsa:92815+hsa:5610
hsa04330	Notch signaling pathway	9	1268	62	7681	0.715784	1	0.145161	ENSG00000106003(LFNG)|ENSG00000114166(KAT2B)|ENSG00000065717(TLE2)|ENSG00000196781(TLE1)|ENSG00000184384(MAML2)|ENSG00000164683(HEY1)|ENSG00000196782(MAML3)|ENSG00000171611(PTCRA)|ENSG00000159692(CTBP1)	hsa:3955|hsa:8850|hsa:7089|hsa:7088|hsa:84441|hsa:23462|hsa:55534|hsa:171558|hsa:1487	http://www.kegg.jp/kegg-bin/show_pathway?hsa04330+hsa:3955+hsa:8850+hsa:7089+hsa:7088+hsa:84441+hsa:23462+hsa:55534+hsa:171558+hsa:1487
hsa04340	Hedgehog signaling pathway	8	1268	55	7681	0.707945	1	0.145455	ENSG00000180138(CSNK1A1L)|ENSG00000171791(BCL2)|ENSG00000164161(HHIP)|ENSG00000111087(GLI1)|ENSG00000133275(CSNK1G2)|ENSG00000185920(PTCH1)|ENSG00000142875(PRKACB)|ENSG00000054392(HHAT)	hsa:122011|hsa:596|hsa:64399|hsa:2735|hsa:1455|hsa:5727|hsa:5567|hsa:55733	http://www.kegg.jp/kegg-bin/show_pathway?hsa04340+hsa:122011+hsa:596+hsa:64399+hsa:2735+hsa:1455+hsa:5727+hsa:5567+hsa:55733
hsa04392	Hippo signaling pathway - multiple species	4	1268	28	7681	0.702095	1	0.142857	ENSG00000169435(RASSF6)|ENSG00000196159(FAT4)|ENSG00000113645(WWC1)|ENSG00000166341(DCHS1)	hsa:166824|hsa:79633|hsa:23286|hsa:8642	http://www.kegg.jp/kegg-bin/show_pathway?hsa04392+hsa:166824+hsa:79633+hsa:23286+hsa:8642
hsa04621	NOD-like receptor signaling pathway	26	1268	173	7681	0.732423	1	0.150289	ENSG00000182621(PLCB1)|ENSG00000091592(NLRP1)|ENSG00000164821(DEFA4)|ENSG00000171855(IFNB1)|ENSG00000171791(BCL2)|ENSG00000239839(DEFA3)|ENSG00000096433(ITPR3)|ENSG00000185386(MAPK11)|ENSG00000101333(PLCB4)|ENSG00000213928(IRF9)|ENSG00000118503(TNFAIP3)|ENSG00000125538(IL1B)|ENSG00000232810(TNF)|ENSG00000100906(NFKBIA)|ENSG00000109339(MAPK10)|ENSG00000265972(TXNIP)|ENSG00000137275(RIPK1)|ENSG0000…	hsa:23236|hsa:22861|hsa:1669|hsa:3456|hsa:596|hsa:1668|hsa:3710|hsa:5600|hsa:5332|hsa:10379|hsa:7128|hsa:3553|hsa:7124|hsa:4792|hsa:5602|hsa:10628|hsa:8737|hsa:3442|hsa:1667|hsa:4790|hsa:171389|hsa:114548|hsa:4938|hsa:4940|hsa:4939|hsa:6352	http://www.kegg.jp/kegg-bin/show_pathway?hsa04621+hsa:23236+hsa:22861+hsa:1669+hsa:3456+hsa:596+hsa:1668+hsa:3710+hsa:5600+hsa:5332+hsa:10379+hsa:7128+hsa:3553+hsa:7124+hsa:4792+hsa:5602+hsa:10628+hsa:8737+hsa:3442+hsa:1667+hsa:4790+hsa:171389+hsa:114548+hsa:4938+hsa:4940+hsa:4939+hsa:6352
hsa04657	IL-17 signaling pathway	14	1268	93	7681	0.690573	1	0.150538	ENSG00000185386(MAPK11)|ENSG00000112116(IL17F)|ENSG00000148346(LCN2)|ENSG00000124391(IL17C)|ENSG00000112115(IL17A)|ENSG00000118503(TNFAIP3)|ENSG00000125538(IL1B)|ENSG00000232810(TNF)|ENSG00000100906(NFKBIA)|ENSG00000109339(MAPK10)|ENSG00000163701(IL17RE)|ENSG00000109320(NFKB1)|ENSG00000076604(TRAF4)|ENSG00000073756(PTGS2)	hsa:5600|hsa:112744|hsa:3934|hsa:27189|hsa:3605|hsa:7128|hsa:3553|hsa:7124|hsa:4792|hsa:5602|hsa:132014|hsa:4790|hsa:9618|hsa:5743	http://www.kegg.jp/kegg-bin/show_pathway?hsa04657+hsa:5600+hsa:112744+hsa:3934+hsa:27189+hsa:3605+hsa:7128+hsa:3553+hsa:7124+hsa:4792+hsa:5602+hsa:132014+hsa:4790+hsa:9618+hsa:5743
hsa04710	Circadian rhythm	4	1268	33	7681	0.818009	1	0.121212	ENSG00000198963(RORB)|ENSG00000069667(RORA)|ENSG00000170485(NPAS2)|ENSG00000143365(RORC)	hsa:6096|hsa:6095|hsa:4862|hsa:6097	http://www.kegg.jp/kegg-bin/show_pathway?hsa04710+hsa:6096+hsa:6095+hsa:4862+hsa:6097
hsa04714	Thermogenesis	24	1268	230	7681	0.99698	1	0.104348	ENSG00000198888(MT-ND1)|ENSG00000198763(MT-ND2)|ENSG00000198804(MT-CO1)|ENSG00000228253(MT-ATP8)|ENSG00000198899(MT-ATP6)|ENSG00000198840(MT-ND3)|ENSG00000198886(MT-ND4)|ENSG00000198786(MT-ND5)|ENSG00000198727(MT-CYB)|ENSG00000178127(NDUFV2)|ENSG00000072133(RPS6KA6)|ENSG00000164742(ADCY1)|ENSG00000173473(SMARCC1)|ENSG00000185386(MAPK11)|ENSG00000066117(SMARCD1)|ENSG00000185532(PRKG1)|ENSG00000034…	hsa:4535|hsa:4536|hsa:4512|hsa:4509|hsa:4508|hsa:4537|hsa:4538|hsa:4540|hsa:4519|hsa:4729|hsa:27330|hsa:107|hsa:6599|hsa:5600|hsa:6602|hsa:5592|hsa:5606|hsa:57521|hsa:5346|hsa:8110|hsa:6199|hsa:2260|hsa:5567|hsa:5593	http://www.kegg.jp/kegg-bin/show_pathway?hsa04714+hsa:4535+hsa:4536+hsa:4512+hsa:4509+hsa:4508+hsa:4537+hsa:4538+hsa:4540+hsa:4519+hsa:4729+hsa:27330+hsa:107+hsa:6599+hsa:5600+hsa:6602+hsa:5592+hsa:5606+hsa:57521+hsa:5346+hsa:8110+hsa:6199+hsa:2260+hsa:5567+hsa:5593
hsa04721	Synaptic vesicle cycle	10	1268	75	7681	0.814511	1	0.133333	ENSG00000106688(SLC1A1)|ENSG00000108576(SLC6A4)|ENSG00000067715(SYT1)|ENSG00000165646(SLC18A2)|ENSG00000105929(ATP6V0A4)|ENSG00000197959(DNM3)|ENSG00000213760(ATP6V1G2)|ENSG00000141837(CACNA1A)|ENSG00000171130(ATP6V0E2)|ENSG00000151418(ATP6V1G3)	hsa:6505|hsa:6532|hsa:6857|hsa:6571|hsa:50617|hsa:26052|hsa:534|hsa:773|hsa:155066|hsa:127124	http://www.kegg.jp/kegg-bin/show_pathway?hsa04721+hsa:6505+hsa:6532+hsa:6857+hsa:6571+hsa:50617+hsa:26052+hsa:534+hsa:773+hsa:155066+hsa:127124
hsa04744	Phototransduction	3	1268	28	7681	0.864113	1	0.107143	ENSG00000074621(SLC24A1)|ENSG00000198515(CNGA1)|ENSG00000114124(GRK7)	hsa:9187|hsa:1259|hsa:131890	http://www.kegg.jp/kegg-bin/show_pathway?hsa04744+hsa:9187+hsa:1259+hsa:131890
hsa04910	Insulin signaling pathway	16	1268	133	7681	0.940795	1	0.120301	ENSG00000188191(PRKAR1B)|ENSG00000152270(PDE3B)|ENSG00000171608(PIK3CD)|ENSG00000068383(INPP5A)|ENSG00000114423(CBLB)|ENSG00000049769(PPP1R3F)|ENSG00000005249(PRKAR2B)|ENSG00000145675(PIK3R1)|ENSG00000105221(AKT2)|ENSG00000157764(BRAF)|ENSG00000156510(HKDC1)|ENSG00000141564(RPTOR)|ENSG00000109339(MAPK10)|ENSG00000175634(RPS6KB2)|ENSG00000142875(PRKACB)|ENSG00000129946(SHC2)	hsa:5575|hsa:5140|hsa:5293|hsa:3632|hsa:868|hsa:89801|hsa:5577|hsa:5295|hsa:208|hsa:673|hsa:80201|hsa:57521|hsa:5602|hsa:6199|hsa:5567|hsa:25759	http://www.kegg.jp/kegg-bin/show_pathway?hsa04910+hsa:5575+hsa:5140+hsa:5293+hsa:3632+hsa:868+hsa:89801+hsa:5577+hsa:5295+hsa:208+hsa:673+hsa:80201+hsa:57521+hsa:5602+hsa:6199+hsa:5567+hsa:25759
hsa04912	GnRH signaling pathway	13	1268	92	7681	0.772158	1	0.141304	ENSG00000182621(PLCB1)|ENSG00000164742(ADCY1)|ENSG00000058404(CAMK2B)|ENSG00000096433(ITPR3)|ENSG00000185386(MAPK11)|ENSG00000101333(PLCB4)|ENSG00000154229(PRKCA)|ENSG00000034152(MAP2K3)|ENSG00000109339(MAPK10)|ENSG00000148660(CAMK2G)|ENSG00000142875(PRKACB)|ENSG00000166501(PRKCB)|ENSG00000151067(CACNA1C)	hsa:23236|hsa:107|hsa:816|hsa:3710|hsa:5600|hsa:5332|hsa:5578|hsa:5606|hsa:5602|hsa:818|hsa:5567|hsa:5579|hsa:775	http://www.kegg.jp/kegg-bin/show_pathway?hsa04912+hsa:23236+hsa:107+hsa:816+hsa:3710+hsa:5600+hsa:5332+hsa:5578+hsa:5606+hsa:5602+hsa:818+hsa:5567+hsa:5579+hsa:775
hsa04913	Ovarian steroidogenesis	7	1268	49	7681	0.72079	1	0.142857	ENSG00000164742(ADCY1)|ENSG00000138039(LHCGR)|ENSG00000140459(CYP11A1)|ENSG00000134716(CYP2J2)|ENSG00000140443(IGF1R)|ENSG00000142875(PRKACB)|ENSG00000073756(PTGS2)	hsa:107|hsa:3973|hsa:1583|hsa:1573|hsa:3480|hsa:5567|hsa:5743	http://www.kegg.jp/kegg-bin/show_pathway?hsa04913+hsa:107+hsa:3973+hsa:1583+hsa:1573+hsa:3480+hsa:5567+hsa:5743
hsa04915	Estrogen signaling pathway	19	1268	125	7681	0.69108	1	0.152	ENSG00000182621(PLCB1)|ENSG00000164850(GPER1)|ENSG00000164742(ADCY1)|ENSG00000171791(BCL2)|ENSG00000096433(ITPR3)|ENSG00000171608(PIK3CD)|ENSG00000101333(PLCB4)|ENSG00000082175(PGR)|ENSG00000127955(GNAI1)|ENSG00000112038(OPRM1)|ENSG00000145675(PIK3R1)|ENSG00000105221(AKT2)|ENSG00000087258(GNAO1)|ENSG00000162728(KCNJ9)|ENSG00000140009(ESR2)|ENSG00000213676(ATF6B)|ENSG00000142875(PRKACB)|ENSG000001…	hsa:23236|hsa:2852|hsa:107|hsa:596|hsa:3710|hsa:5293|hsa:5332|hsa:5241|hsa:2770|hsa:4988|hsa:5295|hsa:208|hsa:2775|hsa:3765|hsa:2100|hsa:1388|hsa:5567|hsa:25759|hsa:3885	http://www.kegg.jp/kegg-bin/show_pathway?hsa04915+hsa:23236+hsa:2852+hsa:107+hsa:596+hsa:3710+hsa:5293+hsa:5332+hsa:5241+hsa:2770+hsa:4988+hsa:5295+hsa:208+hsa:2775+hsa:3765+hsa:2100+hsa:1388+hsa:5567+hsa:25759+hsa:3885
hsa04920	Adipocytokine signaling pathway	8	1268	69	7681	0.902456	1	0.115942	ENSG00000065675(PRKCQ)|ENSG00000103740(ACSBG1)|ENSG00000110931(CAMKK2)|ENSG00000105221(AKT2)|ENSG00000232810(TNF)|ENSG00000100906(NFKBIA)|ENSG00000109339(MAPK10)|ENSG00000109320(NFKB1)	hsa:5588|hsa:23205|hsa:10645|hsa:208|hsa:7124|hsa:4792|hsa:5602|hsa:4790	http://www.kegg.jp/kegg-bin/show_pathway?hsa04920+hsa:5588+hsa:23205+hsa:10645+hsa:208+hsa:7124+hsa:4792+hsa:5602+hsa:4790
hsa04922	Glucagon signaling pathway	10	1268	102	7681	0.981239	1	0.0980392	ENSG00000182621(PLCB1)|ENSG00000142178(SIK1)|ENSG00000166796(LDHC)|ENSG00000058404(CAMK2B)|ENSG00000096433(ITPR3)|ENSG00000152270(PDE3B)|ENSG00000101333(PLCB4)|ENSG00000105221(AKT2)|ENSG00000148660(CAMK2G)|ENSG00000142875(PRKACB)	hsa:23236|hsa:150094|hsa:3948|hsa:816|hsa:3710|hsa:5140|hsa:5332|hsa:208|hsa:818|hsa:5567	http://www.kegg.jp/kegg-bin/show_pathway?hsa04922+hsa:23236+hsa:150094+hsa:3948+hsa:816+hsa:3710+hsa:5140+hsa:5332+hsa:208+hsa:818+hsa:5567
hsa04931	Insulin resistance	15	1268	103	7681	0.742923	1	0.145631	ENSG00000065675(PRKCQ)|ENSG00000072133(RPS6KA6)|ENSG00000171608(PIK3CD)|ENSG00000145675(PIK3R1)|ENSG00000175727(MLXIP)|ENSG00000105221(AKT2)|ENSG00000131459(GFPT2)|ENSG00000232810(TNF)|ENSG00000100906(NFKBIA)|ENSG00000109339(MAPK10)|ENSG00000198408(OGA)|ENSG00000175634(RPS6KB2)|ENSG00000166501(PRKCB)|ENSG00000109320(NFKB1)|ENSG00000135744(AGT)	hsa:5588|hsa:27330|hsa:5293|hsa:5295|hsa:22877|hsa:208|hsa:9945|hsa:7124|hsa:4792|hsa:5602|hsa:10724|hsa:6199|hsa:5579|hsa:4790|hsa:183	http://www.kegg.jp/kegg-bin/show_pathway?hsa04931+hsa:5588+hsa:27330+hsa:5293+hsa:5295+hsa:22877+hsa:208+hsa:9945+hsa:7124+hsa:4792+hsa:5602+hsa:10724+hsa:6199+hsa:5579+hsa:4790+hsa:183
hsa04932	Non-alcoholic fatty liver disease	15	1268	153	7681	0.993885	1	0.0980392	ENSG00000198804(MT-CO1)|ENSG00000198727(MT-CYB)|ENSG00000178127(NDUFV2)|ENSG00000171608(PIK3CD)|ENSG00000185386(MAPK11)|ENSG00000145675(PIK3R1)|ENSG00000175727(MLXIP)|ENSG00000105221(AKT2)|ENSG00000125538(IL1B)|ENSG00000232810(TNF)|ENSG00000117560(FASLG)|ENSG00000109339(MAPK10)|ENSG00000105329(TGFB1)|ENSG00000109320(NFKB1)|ENSG00000153094(BCL2L11)	hsa:4512|hsa:4519|hsa:4729|hsa:5293|hsa:5600|hsa:5295|hsa:22877|hsa:208|hsa:3553|hsa:7124|hsa:356|hsa:5602|hsa:7040|hsa:4790|hsa:10018	http://www.kegg.jp/kegg-bin/show_pathway?hsa04932+hsa:4512+hsa:4519+hsa:4729+hsa:5293+hsa:5600+hsa:5295+hsa:22877+hsa:208+hsa:3553+hsa:7124+hsa:356+hsa:5602+hsa:7040+hsa:4790+hsa:10018
hsa04936	Alcoholic liver disease	18	1268	133	7681	0.853996	1	0.135338	ENSG00000171855(IFNB1)|ENSG00000185386(MAPK11)|ENSG00000112115(IL17A)|ENSG00000081059(TCF7)|ENSG00000034152(MAP2K3)|ENSG00000110931(CAMKK2)|ENSG00000113302(IL12B)|ENSG00000105221(AKT2)|ENSG00000125538(IL1B)|ENSG00000232810(TNF)|ENSG00000117560(FASLG)|ENSG00000100906(NFKBIA)|ENSG00000109339(MAPK10)|ENSG00000137275(RIPK1)|ENSG00000147873(IFNA5)|ENSG00000138795(LEF1)|ENSG00000109320(NFKB1)|ENSG00000…	hsa:3456|hsa:5600|hsa:3605|hsa:6932|hsa:5606|hsa:10645|hsa:3593|hsa:208|hsa:3553|hsa:7124|hsa:356|hsa:4792|hsa:5602|hsa:8737|hsa:3442|hsa:51176|hsa:4790|hsa:23175	http://www.kegg.jp/kegg-bin/show_pathway?hsa04936+hsa:3456+hsa:5600+hsa:3605+hsa:6932+hsa:5606+hsa:10645+hsa:3593+hsa:208+hsa:3553+hsa:7124+hsa:356+hsa:4792+hsa:5602+hsa:8737+hsa:3442+hsa:51176+hsa:4790+hsa:23175
hsa04962	Vasopressin-regulated water reabsorption	2	1268	42	7681	0.995317	1	0.047619	ENSG00000142875(PRKACB)|ENSG00000187240(DYNC2H1)	hsa:5567|hsa:79659	http://www.kegg.jp/kegg-bin/show_pathway?hsa04962+hsa:5567+hsa:79659
hsa04975	Fat digestion and absorption	3	1268	37	7681	0.957025	1	0.0810811	ENSG00000015520(NPC1L1)|ENSG00000118137(APOA1)|ENSG00000143921(ABCG8)	hsa:29881|hsa:335|hsa:64241	http://www.kegg.jp/kegg-bin/show_pathway?hsa04975+hsa:29881+hsa:335+hsa:64241
hsa04979	Cholesterol metabolism	6	1268	48	7681	0.826954	1	0.125	ENSG00000007944(MYLIP)|ENSG00000157978(LDLRAP1)|ENSG00000166035(LIPC)|ENSG00000021762(OSBPL5)|ENSG00000118137(APOA1)|ENSG00000143921(ABCG8)	hsa:29116|hsa:26119|hsa:3990|hsa:114879|hsa:335|hsa:64241	http://www.kegg.jp/kegg-bin/show_pathway?hsa04979+hsa:29116+hsa:26119+hsa:3990+hsa:114879+hsa:335+hsa:64241
hsa04980	Cobalamin transport and metabolism	1	1268	18	7681	0.961286	1	0.0555556	ENSG00000116984(MTR)	hsa:4548	http://www.kegg.jp/kegg-bin/show_pathway?hsa04980+hsa:4548
hsa04981	Folate transport and metabolism	3	1268	27	7681	0.846754	1	0.111111	ENSG00000132840(BHMT2)|ENSG00000165457(FOLR2)|ENSG00000116984(MTR)	hsa:23743|hsa:2350|hsa:4548	http://www.kegg.jp/kegg-bin/show_pathway?hsa04981+hsa:23743+hsa:2350+hsa:4548
hsa05010	Alzheimer disease	50	1268	377	7681	0.967747	1	0.132626	ENSG00000198888(MT-ND1)|ENSG00000198763(MT-ND2)|ENSG00000198804(MT-CO1)|ENSG00000228253(MT-ATP8)|ENSG00000198899(MT-ATP6)|ENSG00000198840(MT-ND3)|ENSG00000198886(MT-ND4)|ENSG00000198786(MT-ND5)|ENSG00000198727(MT-CYB)|ENSG00000178127(NDUFV2)|ENSG00000178462(TUBAL3)|ENSG00000180138(CSNK1A1L)|ENSG00000182240(BACE2)|ENSG00000182621(PLCB1)|ENSG00000154764(WNT7A)|ENSG00000166313(APBB1)|ENSG00000070018…	hsa:4535|hsa:4536|hsa:4512|hsa:4509|hsa:4508|hsa:4537|hsa:4538|hsa:4540|hsa:4519|hsa:4729|hsa:79861|hsa:122011|hsa:25825|hsa:23236|hsa:7476|hsa:322|hsa:4040|hsa:81027|hsa:3710|hsa:5293|hsa:8851|hsa:5332|hsa:7473|hsa:7479|hsa:29986|hsa:9821|hsa:2902|hsa:51384|hsa:2905|hsa:5295|hsa:208|hsa:3553|hsa:673|hsa:8313|hsa:7124|hsa:6263|hsa:5683|hsa:7480|hsa:7471|hsa:5602|hsa:177|hsa:4790|hsa:1131|hsa:1128…	http://www.kegg.jp/kegg-bin/show_pathway?hsa05010+hsa:4535+hsa:4536+hsa:4512+hsa:4509+hsa:4508+hsa:4537+hsa:4538+hsa:4540+hsa:4519+hsa:4729+hsa:79861+hsa:122011+hsa:25825+hsa:23236+hsa:7476+hsa:322+hsa:4040+hsa:81027+hsa:3710+hsa:5293+hsa:8851+hsa:5332+hsa:7473+hsa:7479+hsa:29986+hsa:9821+hsa:2902+hsa:51384+hsa:2905+hsa:5295+hsa:208+hsa:3553+hsa:673+hsa:8313+hsa:7124+hsa:6263+hsa:5683+hsa:7480+hs…
hsa05012	Parkinson disease	28	1268	261	7681	0.997228	1	0.10728	ENSG00000198888(MT-ND1)|ENSG00000198763(MT-ND2)|ENSG00000198804(MT-CO1)|ENSG00000228253(MT-ATP8)|ENSG00000198899(MT-ATP6)|ENSG00000198840(MT-ND3)|ENSG00000198886(MT-ND4)|ENSG00000198786(MT-ND5)|ENSG00000198727(MT-CYB)|ENSG00000178127(NDUFV2)|ENSG00000178462(TUBAL3)|ENSG00000128271(ADORA2A)|ENSG00000101162(TUBB1)|ENSG00000058404(CAMK2B)|ENSG00000096433(ITPR3)|ENSG00000141404(GNAL)|ENSG00000165646(…	hsa:4535|hsa:4536|hsa:4512|hsa:4509|hsa:4508|hsa:4537|hsa:4538|hsa:4540|hsa:4519|hsa:4729|hsa:79861|hsa:135|hsa:81027|hsa:816|hsa:3710|hsa:2774|hsa:6571|hsa:2770|hsa:29986|hsa:5335|hsa:5071|hsa:6263|hsa:5683|hsa:5602|hsa:818|hsa:5567|hsa:112714|hsa:7277	http://www.kegg.jp/kegg-bin/show_pathway?hsa05012+hsa:4535+hsa:4536+hsa:4512+hsa:4509+hsa:4508+hsa:4537+hsa:4538+hsa:4540+hsa:4519+hsa:4729+hsa:79861+hsa:135+hsa:81027+hsa:816+hsa:3710+hsa:2774+hsa:6571+hsa:2770+hsa:29986+hsa:5335+hsa:5071+hsa:6263+hsa:5683+hsa:5602+hsa:818+hsa:5567+hsa:112714+hsa:7277
hsa05014	Amyotrophic lateral sclerosis	40	1268	355	7681	0.998236	1	0.112676	ENSG00000198888(MT-ND1)|ENSG00000198763(MT-ND2)|ENSG00000198804(MT-CO1)|ENSG00000228253(MT-ATP8)|ENSG00000198899(MT-ATP6)|ENSG00000198840(MT-ND3)|ENSG00000198886(MT-ND4)|ENSG00000198786(MT-ND5)|ENSG00000198727(MT-CYB)|ENSG00000178127(NDUFV2)|ENSG00000178462(TUBAL3)|ENSG00000108559(NUP88)|ENSG00000105877(DNAH11)|ENSG00000171791(BCL2)|ENSG00000030066(NUP160)|ENSG00000101162(TUBB1)|ENSG00000124721(D…	hsa:4535|hsa:4536|hsa:4512|hsa:4509|hsa:4508|hsa:4537|hsa:4538|hsa:4540|hsa:4519|hsa:4729|hsa:79861|hsa:4927|hsa:8701|hsa:596|hsa:23279|hsa:81027|hsa:1769|hsa:3710|hsa:493869|hsa:3084|hsa:5600|hsa:23225|hsa:9821|hsa:5071|hsa:2882|hsa:1768|hsa:2902|hsa:2905|hsa:5606|hsa:9972|hsa:8632|hsa:7124|hsa:56171|hsa:5683|hsa:9782|hsa:2877|hsa:1770|hsa:112714|hsa:25981|hsa:7277	http://www.kegg.jp/kegg-bin/show_pathway?hsa05014+hsa:4535+hsa:4536+hsa:4512+hsa:4509+hsa:4508+hsa:4537+hsa:4538+hsa:4540+hsa:4519+hsa:4729+hsa:79861+hsa:4927+hsa:8701+hsa:596+hsa:23279+hsa:81027+hsa:1769+hsa:3710+hsa:493869+hsa:3084+hsa:5600+hsa:23225+hsa:9821+hsa:5071+hsa:2882+hsa:1768+hsa:2902+hsa:2905+hsa:5606+hsa:9972+hsa:8632+hsa:7124+hsa:56171+hsa:5683+hsa:9782+hsa:2877+hsa:1770+hsa:112714…
hsa05016	Huntington disease	33	1268	300	7681	0.997638	1	0.11	ENSG00000198888(MT-ND1)|ENSG00000198763(MT-ND2)|ENSG00000198804(MT-CO1)|ENSG00000228253(MT-ATP8)|ENSG00000198899(MT-ATP6)|ENSG00000198840(MT-ND3)|ENSG00000198886(MT-ND4)|ENSG00000198786(MT-ND5)|ENSG00000198727(MT-CYB)|ENSG00000178127(NDUFV2)|ENSG00000178462(TUBAL3)|ENSG00000182621(PLCB1)|ENSG00000141384(TAF4B)|ENSG00000105877(DNAH11)|ENSG00000101162(TUBB1)|ENSG00000124721(DNAH8)|ENSG00000164294(G…	hsa:4535|hsa:4536|hsa:4512|hsa:4509|hsa:4508|hsa:4537|hsa:4538|hsa:4540|hsa:4519|hsa:4729|hsa:79861|hsa:23236|hsa:6875|hsa:8701|hsa:81027|hsa:1769|hsa:493869|hsa:5332|hsa:2893|hsa:9821|hsa:2882|hsa:1768|hsa:2902|hsa:25942|hsa:8632|hsa:56171|hsa:5683|hsa:5602|hsa:2877|hsa:1770|hsa:112714|hsa:25981|hsa:7277	http://www.kegg.jp/kegg-bin/show_pathway?hsa05016+hsa:4535+hsa:4536+hsa:4512+hsa:4509+hsa:4508+hsa:4537+hsa:4538+hsa:4540+hsa:4519+hsa:4729+hsa:79861+hsa:23236+hsa:6875+hsa:8701+hsa:81027+hsa:1769+hsa:493869+hsa:5332+hsa:2893+hsa:9821+hsa:2882+hsa:1768+hsa:2902+hsa:25942+hsa:8632+hsa:56171+hsa:5683+hsa:5602+hsa:2877+hsa:1770+hsa:112714+hsa:25981+hsa:7277
hsa05017	Spinocerebellar ataxia	18	1268	136	7681	0.877832	1	0.132353	ENSG00000182621(PLCB1)|ENSG00000096433(ITPR3)|ENSG00000171608(PIK3CD)|ENSG00000101333(PLCB4)|ENSG00000023287(RB1CC1)|ENSG00000154229(PRKCA)|ENSG00000069667(RORA)|ENSG00000176884(GRIN1)|ENSG00000161509(GRIN2C)|ENSG00000145675(PIK3R1)|ENSG00000105221(AKT2)|ENSG00000106588(PSMA2)|ENSG00000138741(TRPC3)|ENSG00000109339(MAPK10)|ENSG00000141837(CACNA1A)|ENSG00000166501(PRKCB)|ENSG00000055917(PUM2)|ENSG…	hsa:23236|hsa:3710|hsa:5293|hsa:5332|hsa:9821|hsa:5578|hsa:6095|hsa:2902|hsa:2905|hsa:5295|hsa:208|hsa:5683|hsa:7222|hsa:5602|hsa:773|hsa:5579|hsa:23369|hsa:1600	http://www.kegg.jp/kegg-bin/show_pathway?hsa05017+hsa:23236+hsa:3710+hsa:5293+hsa:5332+hsa:9821+hsa:5578+hsa:6095+hsa:2902+hsa:2905+hsa:5295+hsa:208+hsa:5683+hsa:7222+hsa:5602+hsa:773+hsa:5579+hsa:23369+hsa:1600
hsa05020	Prion disease	31	1268	268	7681	0.991589	1	0.115672	ENSG00000198888(MT-ND1)|ENSG00000198763(MT-ND2)|ENSG00000198804(MT-CO1)|ENSG00000228253(MT-ATP8)|ENSG00000198899(MT-ATP6)|ENSG00000198840(MT-ND3)|ENSG00000198886(MT-ND4)|ENSG00000198786(MT-ND5)|ENSG00000198727(MT-CYB)|ENSG00000178127(NDUFV2)|ENSG00000178462(TUBAL3)|ENSG00000101162(TUBB1)|ENSG00000096433(ITPR3)|ENSG00000171608(PIK3CD)|ENSG00000185386(MAPK11)|ENSG00000176884(GRIN1)|ENSG00000161509(…	hsa:4535|hsa:4536|hsa:4512|hsa:4509|hsa:4508|hsa:4537|hsa:4538|hsa:4540|hsa:4519|hsa:4729|hsa:79861|hsa:81027|hsa:3710|hsa:5293|hsa:5600|hsa:2902|hsa:2905|hsa:5295|hsa:3553|hsa:2534|hsa:7124|hsa:6263|hsa:5683|hsa:5602|hsa:1388|hsa:6262|hsa:5567|hsa:112714|hsa:775|hsa:6352|hsa:7277	http://www.kegg.jp/kegg-bin/show_pathway?hsa05020+hsa:4535+hsa:4536+hsa:4512+hsa:4509+hsa:4508+hsa:4537+hsa:4538+hsa:4540+hsa:4519+hsa:4729+hsa:79861+hsa:81027+hsa:3710+hsa:5293+hsa:5600+hsa:2902+hsa:2905+hsa:5295+hsa:3553+hsa:2534+hsa:7124+hsa:6263+hsa:5683+hsa:5602+hsa:1388+hsa:6262+hsa:5567+hsa:112714+hsa:775+hsa:6352+hsa:7277
hsa05022	Pathways of neurodegeneration - multiple diseases	66	1268	464	7681	0.925959	1	0.142241	ENSG00000198888(MT-ND1)|ENSG00000198763(MT-ND2)|ENSG00000198804(MT-CO1)|ENSG00000228253(MT-ATP8)|ENSG00000198899(MT-ATP6)|ENSG00000198840(MT-ND3)|ENSG00000198886(MT-ND4)|ENSG00000198786(MT-ND5)|ENSG00000198727(MT-CYB)|ENSG00000178127(NDUFV2)|ENSG00000178462(TUBAL3)|ENSG00000180138(CSNK1A1L)|ENSG00000182621(PLCB1)|ENSG00000154764(WNT7A)|ENSG00000070018(LRP6)|ENSG00000105877(DNAH11)|ENSG00000171791…	hsa:4535|hsa:4536|hsa:4512|hsa:4509|hsa:4508|hsa:4537|hsa:4538|hsa:4540|hsa:4519|hsa:4729|hsa:79861|hsa:122011|hsa:23236|hsa:7476|hsa:4040|hsa:8701|hsa:596|hsa:81027|hsa:1769|hsa:816|hsa:3710|hsa:493869|hsa:5600|hsa:8851|hsa:5332|hsa:7473|hsa:7479|hsa:2893|hsa:5335|hsa:9821|hsa:5071|hsa:5578|hsa:2882|hsa:1768|hsa:2902|hsa:51384|hsa:2905|hsa:5606|hsa:3553|hsa:673|hsa:8313|hsa:8632|hsa:7124|hsa:356…	http://www.kegg.jp/kegg-bin/show_pathway?hsa05022+hsa:4535+hsa:4536+hsa:4512+hsa:4509+hsa:4508+hsa:4537+hsa:4538+hsa:4540+hsa:4519+hsa:4729+hsa:79861+hsa:122011+hsa:23236+hsa:7476+hsa:4040+hsa:8701+hsa:596+hsa:81027+hsa:1769+hsa:816+hsa:3710+hsa:493869+hsa:5600+hsa:8851+hsa:5332+hsa:7473+hsa:7479+hsa:2893+hsa:5335+hsa:9821+hsa:5071+hsa:5578+hsa:2882+hsa:1768+hsa:2902+hsa:51384+hsa:2905+hsa:5606+h…
hsa05033	Nicotine addiction	5	1268	34	7681	0.682412	1	0.147059	ENSG00000163288(GABRB1)|ENSG00000152578(GRIA4)|ENSG00000176884(GRIN1)|ENSG00000161509(GRIN2C)|ENSG00000141837(CACNA1A)	hsa:2560|hsa:2893|hsa:2902|hsa:2905|hsa:773	http://www.kegg.jp/kegg-bin/show_pathway?hsa05033+hsa:2560+hsa:2893+hsa:2902+hsa:2905+hsa:773
hsa05131	Shigellosis	38	1268	242	7681	0.661221	1	0.157025	ENSG00000100055(CYTH4)|ENSG00000065675(PRKCQ)|ENSG00000062598(ELMO2)|ENSG00000160201(U2AF1)|ENSG00000182621(PLCB1)|ENSG00000171855(IFNB1)|ENSG00000171791(BCL2)|ENSG00000278828(H3C10)|ENSG00000096433(ITPR3)|ENSG00000171608(PIK3CD)|ENSG00000101335(MYL9)|ENSG00000185386(MAPK11)|ENSG00000101333(PLCB4)|ENSG00000035403(VCL)|ENSG00000138193(PLCE1)|ENSG00000124181(PLCG1)|ENSG00000125354(SEPTIN6)|ENSG0000…	hsa:27128|hsa:5588|hsa:63916|hsa:7307|hsa:23236|hsa:3456|hsa:596|hsa:8357|hsa:3710|hsa:5293|hsa:10398|hsa:5600|hsa:5332|hsa:7414|hsa:51196|hsa:5335|hsa:23157|hsa:57180|hsa:5295|hsa:8936|hsa:5747|hsa:208|hsa:3553|hsa:80201|hsa:57521|hsa:8358|hsa:7124|hsa:199746|hsa:4792|hsa:5602|hsa:8737|hsa:6199|hsa:10318|hsa:4790|hsa:114548|hsa:472|hsa:7100|hsa:6352	http://www.kegg.jp/kegg-bin/show_pathway?hsa05131+hsa:27128+hsa:5588+hsa:63916+hsa:7307+hsa:23236+hsa:3456+hsa:596+hsa:8357+hsa:3710+hsa:5293+hsa:10398+hsa:5600+hsa:5332+hsa:7414+hsa:51196+hsa:5335+hsa:23157+hsa:57180+hsa:5295+hsa:8936+hsa:5747+hsa:208+hsa:3553+hsa:80201+hsa:57521+hsa:8358+hsa:7124+hsa:199746+hsa:4792+hsa:5602+hsa:8737+hsa:6199+hsa:10318+hsa:4790+hsa:114548+hsa:472+hsa:7100+hsa:6…
hsa05132	Salmonella infection	34	1268	245	7681	0.88967	1	0.138776	ENSG00000132970(WASF3)|ENSG00000100055(CYTH4)|ENSG00000178462(TUBAL3)|ENSG00000062598(ELMO2)|ENSG00000171791(BCL2)|ENSG00000101162(TUBB1)|ENSG00000171608(PIK3CD)|ENSG00000101335(MYL9)|ENSG00000185386(MAPK11)|ENSG00000185567(AHNAK2)|ENSG00000196586(MYO6)|ENSG00000081059(TCF7)|ENSG00000136997(MYC)|ENSG00000114790(ARHGEF26)|ENSG00000133627(ACTR3B)|ENSG00000121858(TNFSF10)|ENSG00000034152(MAP2K3)|ENS…	hsa:10810|hsa:27128|hsa:79861|hsa:63916|hsa:596|hsa:81027|hsa:5293|hsa:10398|hsa:5600|hsa:113146|hsa:4646|hsa:6932|hsa:4609|hsa:26084|hsa:57180|hsa:8743|hsa:5606|hsa:208|hsa:3553|hsa:26999|hsa:7124|hsa:4792|hsa:5602|hsa:8737|hsa:51429|hsa:51176|hsa:5788|hsa:4790|hsa:114548|hsa:112714|hsa:7100|hsa:79659|hsa:7277|hsa:5287	http://www.kegg.jp/kegg-bin/show_pathway?hsa05132+hsa:10810+hsa:27128+hsa:79861+hsa:63916+hsa:596+hsa:81027+hsa:5293+hsa:10398+hsa:5600+hsa:113146+hsa:4646+hsa:6932+hsa:4609+hsa:26084+hsa:57180+hsa:8743+hsa:5606+hsa:208+hsa:3553+hsa:26999+hsa:7124+hsa:4792+hsa:5602+hsa:8737+hsa:51429+hsa:51176+hsa:5788+hsa:4790+hsa:114548+hsa:112714+hsa:7100+hsa:79659+hsa:7277+hsa:5287
hsa05133	Pertussis	10	1268	76	7681	0.827244	1	0.131579	ENSG00000185386(MAPK11)|ENSG00000127955(GNAI1)|ENSG00000165410(CFL2)|ENSG00000113302(IL12B)|ENSG00000125538(IL1B)|ENSG00000232810(TNF)|ENSG00000109339(MAPK10)|ENSG00000123843(C4BPB)|ENSG00000109320(NFKB1)|ENSG00000162711(NLRP3)	hsa:5600|hsa:2770|hsa:1073|hsa:3593|hsa:3553|hsa:7124|hsa:5602|hsa:725|hsa:4790|hsa:114548	http://www.kegg.jp/kegg-bin/show_pathway?hsa05133+hsa:5600+hsa:2770+hsa:1073+hsa:3593+hsa:3553+hsa:7124+hsa:5602+hsa:725+hsa:4790+hsa:114548
hsa05134	Legionellosis	7	1268	55	7681	0.825575	1	0.127273	ENSG00000113302(IL12B)|ENSG00000125538(IL1B)|ENSG00000232810(TNF)|ENSG00000100906(NFKBIA)|ENSG00000109320(NFKB1)|ENSG00000187554(TLR5)|ENSG00000203710(CR1)	hsa:3593|hsa:3553|hsa:7124|hsa:4792|hsa:4790|hsa:7100|hsa:1378	http://www.kegg.jp/kegg-bin/show_pathway?hsa05134+hsa:3593+hsa:3553+hsa:7124+hsa:4792+hsa:4790+hsa:7100+hsa:1378
hsa05145	Toxoplasmosis	17	1268	111	7681	0.672678	1	0.153153	ENSG00000171791(BCL2)|ENSG00000102245(CD40LG)|ENSG00000198502(HLA-DRB5)|ENSG00000179344(HLA-DQB1)|ENSG00000185386(MAPK11)|ENSG00000127955(GNAI1)|ENSG00000034152(MAP2K3)|ENSG00000113302(IL12B)|ENSG00000105221(AKT2)|ENSG00000087258(GNAO1)|ENSG00000091136(LAMB1)|ENSG00000232810(TNF)|ENSG00000100906(NFKBIA)|ENSG00000109339(MAPK10)|ENSG00000105329(TGFB1)|ENSG00000109320(NFKB1)|ENSG00000091409(ITGA6)	hsa:596|hsa:959|hsa:3127|hsa:3119|hsa:5600|hsa:2770|hsa:5606|hsa:3593|hsa:208|hsa:2775|hsa:3912|hsa:7124|hsa:4792|hsa:5602|hsa:7040|hsa:4790|hsa:3655	http://www.kegg.jp/kegg-bin/show_pathway?hsa05145+hsa:596+hsa:959+hsa:3127+hsa:3119+hsa:5600+hsa:2770+hsa:5606+hsa:3593+hsa:208+hsa:2775+hsa:3912+hsa:7124+hsa:4792+hsa:5602+hsa:7040+hsa:4790+hsa:3655
hsa05150	Staphylococcus aureus infection	10	1268	76	7681	0.827244	1	0.131579	ENSG00000164821(DEFA4)|ENSG00000164825(DEFB1)|ENSG00000239839(DEFA3)|ENSG00000198502(HLA-DRB5)|ENSG00000179344(HLA-DQB1)|ENSG00000186431(FCAR)|ENSG00000206047(DEFA1)|ENSG00000174175(SELP)|ENSG00000162747(FCGR3B)|ENSG00000131737(KRT34)	hsa:1669|hsa:1672|hsa:1668|hsa:3127|hsa:3119|hsa:2204|hsa:1667|hsa:6403|hsa:2215|hsa:3885	http://www.kegg.jp/kegg-bin/show_pathway?hsa05150+hsa:1669+hsa:1672+hsa:1668+hsa:3127+hsa:3119+hsa:2204+hsa:1667+hsa:6403+hsa:2215+hsa:3885
hsa05152	Tuberculosis	21	1268	171	7681	0.950739	1	0.122807	ENSG00000171855(IFNB1)|ENSG00000171791(BCL2)|ENSG00000058404(CAMK2B)|ENSG00000198502(HLA-DRB5)|ENSG00000179344(HLA-DQB1)|ENSG00000185386(MAPK11)|ENSG00000105929(ATP6V0A4)|ENSG00000102879(CORO1A)|ENSG00000113302(IL12B)|ENSG00000105221(AKT2)|ENSG00000125538(IL1B)|ENSG00000140678(ITGAX)|ENSG00000232810(TNF)|ENSG00000134070(IRAK2)|ENSG00000109339(MAPK10)|ENSG00000148660(CAMK2G)|ENSG00000147873(IFNA5)…	hsa:3456|hsa:596|hsa:816|hsa:3127|hsa:3119|hsa:5600|hsa:50617|hsa:11151|hsa:3593|hsa:208|hsa:3553|hsa:3687|hsa:7124|hsa:3656|hsa:5602|hsa:818|hsa:3442|hsa:7040|hsa:4790|hsa:2215|hsa:1378	http://www.kegg.jp/kegg-bin/show_pathway?hsa05152+hsa:3456+hsa:596+hsa:816+hsa:3127+hsa:3119+hsa:5600+hsa:50617+hsa:11151+hsa:3593+hsa:208+hsa:3553+hsa:3687+hsa:7124+hsa:3656+hsa:5602+hsa:818+hsa:3442+hsa:7040+hsa:4790+hsa:2215+hsa:1378
hsa05167	Kaposi sarcoma-associated herpesvirus infection	27	1268	186	7681	0.798051	1	0.145161	ENSG00000186469(GNG2)|ENSG00000171855(IFNB1)|ENSG00000096433(ITPR3)|ENSG00000171608(PIK3CD)|ENSG00000185386(MAPK11)|ENSG00000179934(CCR8)|ENSG00000101412(E2F1)|ENSG00000127920(GNG11)|ENSG00000134352(IL6ST)|ENSG00000081059(TCF7)|ENSG00000124181(PLCG1)|ENSG00000136997(MYC)|ENSG00000145675(PIK3R1)|ENSG00000213928(IRF9)|ENSG00000105221(AKT2)|ENSG00000167414(GNG8)|ENSG00000072736(NFATC3)|ENSG000001009…	hsa:54331|hsa:3456|hsa:3710|hsa:5293|hsa:5600|hsa:1237|hsa:1869|hsa:2791|hsa:3572|hsa:6932|hsa:5335|hsa:4609|hsa:5295|hsa:10379|hsa:208|hsa:94235|hsa:4775|hsa:4792|hsa:5602|hsa:3442|hsa:10681|hsa:3091|hsa:51176|hsa:4790|hsa:1870|hsa:5610|hsa:5743	http://www.kegg.jp/kegg-bin/show_pathway?hsa05167+hsa:54331+hsa:3456+hsa:3710+hsa:5293+hsa:5600+hsa:1237+hsa:1869+hsa:2791+hsa:3572+hsa:6932+hsa:5335+hsa:4609+hsa:5295+hsa:10379+hsa:208+hsa:94235+hsa:4775+hsa:4792+hsa:5602+hsa:3442+hsa:10681+hsa:3091+hsa:51176+hsa:4790+hsa:1870+hsa:5610+hsa:5743
hsa05208	Chemical carcinogenesis - reactive oxygen species	31	1268	220	7681	0.858985	1	0.140909	ENSG00000198888(MT-ND1)|ENSG00000198763(MT-ND2)|ENSG00000198804(MT-CO1)|ENSG00000228253(MT-ATP8)|ENSG00000198899(MT-ATP6)|ENSG00000198840(MT-ND3)|ENSG00000198886(MT-ND4)|ENSG00000198786(MT-ND5)|ENSG00000198727(MT-CYB)|ENSG00000178127(NDUFV2)|ENSG00000149177(PTPRJ)|ENSG00000171608(PIK3CD)|ENSG00000120915(EPHX2)|ENSG00000185386(MAPK11)|ENSG00000140505(CYP1A2)|ENSG00000197446(CYP2F1)|ENSG00000138798…	hsa:4535|hsa:4536|hsa:4512|hsa:4509|hsa:4508|hsa:4537|hsa:4538|hsa:4540|hsa:4519|hsa:4729|hsa:5795|hsa:5293|hsa:2053|hsa:5600|hsa:1544|hsa:1572|hsa:1950|hsa:5295|hsa:2949|hsa:2946|hsa:5747|hsa:208|hsa:2944|hsa:673|hsa:2938|hsa:4792|hsa:5602|hsa:3091|hsa:4790|hsa:23683|hsa:253152	http://www.kegg.jp/kegg-bin/show_pathway?hsa05208+hsa:4535+hsa:4536+hsa:4512+hsa:4509+hsa:4508+hsa:4537+hsa:4538+hsa:4540+hsa:4519+hsa:4729+hsa:5795+hsa:5293+hsa:2053+hsa:5600+hsa:1544+hsa:1572+hsa:1950+hsa:5295+hsa:2949+hsa:2946+hsa:5747+hsa:208+hsa:2944+hsa:673+hsa:2938+hsa:4792+hsa:5602+hsa:3091+hsa:4790+hsa:23683+hsa:253152
hsa05211	Renal cell carcinoma	7	1268	68	7681	0.947093	1	0.102941	ENSG00000171608(PIK3CD)|ENSG00000134954(ETS1)|ENSG00000145675(PIK3R1)|ENSG00000105221(AKT2)|ENSG00000157764(BRAF)|ENSG00000105329(TGFB1)|ENSG00000100644(HIF1A)	hsa:5293|hsa:2113|hsa:5295|hsa:208|hsa:673|hsa:7040|hsa:3091	http://www.kegg.jp/kegg-bin/show_pathway?hsa05211+hsa:5293+hsa:2113+hsa:5295+hsa:208+hsa:673+hsa:7040+hsa:3091
hsa05415	Diabetic cardiomyopathy	32	1268	200	7681	0.607842	1	0.16	ENSG00000198888(MT-ND1)|ENSG00000198763(MT-ND2)|ENSG00000198804(MT-CO1)|ENSG00000228253(MT-ATP8)|ENSG00000198899(MT-ATP6)|ENSG00000198840(MT-ND3)|ENSG00000198886(MT-ND4)|ENSG00000198786(MT-ND5)|ENSG00000198727(MT-CYB)|ENSG00000178127(NDUFV2)|ENSG00000182621(PLCB1)|ENSG00000058404(CAMK2B)|ENSG00000171608(PIK3CD)|ENSG00000185386(MAPK11)|ENSG00000101333(PLCB4)|ENSG00000163513(TGFBR2)|ENSG00000198523…	hsa:4535|hsa:4536|hsa:4512|hsa:4509|hsa:4508|hsa:4537|hsa:4538|hsa:4540|hsa:4519|hsa:4729|hsa:23236|hsa:816|hsa:5293|hsa:5600|hsa:5332|hsa:7048|hsa:5350|hsa:5578|hsa:5295|hsa:208|hsa:9945|hsa:5602|hsa:818|hsa:4088|hsa:7040|hsa:6262|hsa:177|hsa:5579|hsa:4790|hsa:5164|hsa:1277|hsa:183	http://www.kegg.jp/kegg-bin/show_pathway?hsa05415+hsa:4535+hsa:4536+hsa:4512+hsa:4509+hsa:4508+hsa:4537+hsa:4538+hsa:4540+hsa:4519+hsa:4729+hsa:23236+hsa:816+hsa:5293+hsa:5600+hsa:5332+hsa:7048+hsa:5350+hsa:5578+hsa:5295+hsa:208+hsa:9945+hsa:5602+hsa:818+hsa:4088+hsa:7040+hsa:6262+hsa:177+hsa:5579+hsa:4790+hsa:5164+hsa:1277+hsa:183

## Sheet: DEG-DOWN-KEGG-enriched
DEGs Downregulated KEGG Enriched Result of iMG cells derived from schizophrenia patients and controls
ID	Description	Test	TestAll	Ref	RefAll	Pvalue	FDR	richFactor	Gene_id	KEGG_id	URL
hsa04142	Lysosome	67	1431	133	7681	6.94325e-17	2.51345e-14	0.503759	ENSG00000185896(LAMP1)|ENSG00000134575(ACP2)|ENSG00000170266(GLB1)|ENSG00000110719(TCIRG1)|ENSG00000068001(HYAL2)|ENSG00000198951(NAGA)|ENSG00000162511(LAPTM5)|ENSG00000100600(LGMN)|ENSG00000101160(CTSZ)|ENSG00000049860(HEXB)|ENSG00000113273(ARSB)|ENSG00000106367(AP1S1)|ENSG00000135535(CD164)|ENSG00000119655(NPC2)|ENSG00000141012(GALNS)|ENSG00000064601(CTSA)|ENSG00000177879(AP3S1)|ENSG00000102393…	hsa:3916|hsa:53|hsa:2720|hsa:10312|hsa:8692|hsa:4668|hsa:7805|hsa:5641|hsa:1522|hsa:3074|hsa:411|hsa:1174|hsa:8763|hsa:10577|hsa:2588|hsa:5476|hsa:1176|hsa:2717|hsa:245972|hsa:9741|hsa:3920|hsa:2519|hsa:26503|hsa:6272|hsa:537|hsa:27074|hsa:23659|hsa:427|hsa:1514|hsa:175|hsa:4074|hsa:2548|hsa:1515|hsa:1211|hsa:2760|hsa:1508|hsa:5660|hsa:3988|hsa:9114|hsa:54|hsa:4758|hsa:968|hsa:57192|hsa:1512|hsa:…	http://www.kegg.jp/kegg-bin/show_pathway?hsa04142+hsa:3916+hsa:53+hsa:2720+hsa:10312+hsa:8692+hsa:4668+hsa:7805+hsa:5641+hsa:1522+hsa:3074+hsa:411+hsa:1174+hsa:8763+hsa:10577+hsa:2588+hsa:5476+hsa:1176+hsa:2717+hsa:245972+hsa:9741+hsa:3920+hsa:2519+hsa:26503+hsa:6272+hsa:537+hsa:27074+hsa:23659+hsa:427+hsa:1514+hsa:175+hsa:4074+hsa:2548+hsa:1515+hsa:1211+hsa:2760+hsa:1508+hsa:5660+hsa:3988+hsa:91…
hsa01100	Metabolic pathways	394	1431	1499	7681	1.48893e-16	2.69497e-14	0.262842	ENSG00000141401(IMPA2)|ENSG00000179630(LACC1)|ENSG00000133116(KL)|ENSG00000167315(ACAA2)|ENSG00000131069(ACSS2)|ENSG00000169084(DHRSX)|ENSG00000100344(PNPLA3)|ENSG00000004961(HCCS)|ENSG00000170191(NANP)|ENSG00000274276(CBSL)|ENSG00000159228(CBR1)|ENSG00000151632(AKR1C2)|ENSG00000160209(PDXK)|ENSG00000131828(PDHA1)|ENSG00000165609(NUDT5)|ENSG00000160200(CBS)|ENSG00000185808(PIGP)|ENSG00000198610(A…	hsa:3613|hsa:144811|hsa:9365|hsa:10449|hsa:55902|hsa:207063|hsa:80339|hsa:3052|hsa:140838|hsa:102724560|hsa:873|hsa:1646|hsa:8566|hsa:5160|hsa:11164|hsa:875|hsa:51227|hsa:1109|hsa:8612|hsa:8803|hsa:847|hsa:283871|hsa:240|hsa:522|hsa:27231|hsa:5092|hsa:9942|hsa:641371|hsa:9562|hsa:5149|hsa:529|hsa:586|hsa:53|hsa:2879|hsa:514|hsa:216|hsa:4337|hsa:29968|hsa:4257|hsa:5723|hsa:50814|hsa:55361|hsa:8015…	http://www.kegg.jp/kegg-bin/show_pathway?hsa01100+hsa:3613+hsa:144811+hsa:9365+hsa:10449+hsa:55902+hsa:207063+hsa:80339+hsa:3052+hsa:140838+hsa:102724560+hsa:873+hsa:1646+hsa:8566+hsa:5160+hsa:11164+hsa:875+hsa:51227+hsa:1109+hsa:8612+hsa:8803+hsa:847+hsa:283871+hsa:240+hsa:522+hsa:27231+hsa:5092+hsa:9942+hsa:641371+hsa:9562+hsa:5149+hsa:529+hsa:586+hsa:53+hsa:2879+hsa:514+hsa:216+hsa:4337+hsa:29…
hsa04145	Phagosome	68	1431	147	7681	1.02633e-14	1.23844e-12	0.462585	ENSG00000158270(COLEC12)|ENSG00000100365(NCF4)|ENSG00000185896(LAMP1)|ENSG00000165168(CYBB)|ENSG00000260314(MRC1)|ENSG00000144635(DYNC1LI1)|ENSG00000173391(OLR1)|ENSG00000206503(HLA-A)|ENSG00000131100(ATP6V1E1)|ENSG00000176014(TUBB6)|ENSG00000038945(MSR1)|ENSG00000147416(ATP6V1B2)|ENSG00000106803(SEC61B)|ENSG00000049245(VAMP3)|ENSG00000110719(TCIRG1)|ENSG00000174130(TLR6)|ENSG00000079950(STX7)|EN…	hsa:81035|hsa:4689|hsa:3916|hsa:1536|hsa:4360|hsa:51143|hsa:4973|hsa:3105|hsa:529|hsa:84617|hsa:4481|hsa:526|hsa:10952|hsa:9341|hsa:10312|hsa:10333|hsa:8417|hsa:7099|hsa:53407|hsa:523|hsa:528|hsa:245972|hsa:8411|hsa:8992|hsa:3920|hsa:537|hsa:718|hsa:9554|hsa:3134|hsa:51382|hsa:3684|hsa:1514|hsa:4074|hsa:3685|hsa:4353|hsa:715|hsa:3109|hsa:3108|hsa:9114|hsa:7879|hsa:83547|hsa:929|hsa:30835|hsa:3117…	http://www.kegg.jp/kegg-bin/show_pathway?hsa04145+hsa:81035+hsa:4689+hsa:3916+hsa:1536+hsa:4360+hsa:51143+hsa:4973+hsa:3105+hsa:529+hsa:84617+hsa:4481+hsa:526+hsa:10952+hsa:9341+hsa:10312+hsa:10333+hsa:8417+hsa:7099+hsa:53407+hsa:523+hsa:528+hsa:245972+hsa:8411+hsa:8992+hsa:3920+hsa:537+hsa:718+hsa:9554+hsa:3134+hsa:51382+hsa:3684+hsa:1514+hsa:4074+hsa:3685+hsa:4353+hsa:715+hsa:3109+hsa:3108+hsa:…
hsa05323	Rheumatoid arthritis	44	1431	91	7681	9.0388e-11	8.18011e-09	0.483516	ENSG00000102524(TNFSF13B)|ENSG00000170345(FOS)|ENSG00000131100(ATP6V1E1)|ENSG00000147416(ATP6V1B2)|ENSG00000110719(TCIRG1)|ENSG00000108691(CCL2)|ENSG00000163735(CXCL5)|ENSG00000163739(CXCL1)|ENSG00000136869(TLR4)|ENSG00000164400(CSF2)|ENSG00000169429(CXCL8)|ENSG00000124875(CXCL6)|ENSG00000114573(ATP6V1A)|ENSG00000155097(ATP6V1C1)|ENSG00000114013(CD86)|ENSG00000147614(ATP6V0D2)|ENSG00000113732(ATP…	hsa:10673|hsa:2353|hsa:529|hsa:526|hsa:10312|hsa:6347|hsa:6374|hsa:2919|hsa:7099|hsa:1437|hsa:3576|hsa:6372|hsa:523|hsa:528|hsa:942|hsa:245972|hsa:8992|hsa:537|hsa:3458|hsa:3600|hsa:51382|hsa:1514|hsa:1435|hsa:3109|hsa:3108|hsa:7422|hsa:9114|hsa:54|hsa:3117|hsa:3118|hsa:3120|hsa:9296|hsa:3552|hsa:3122|hsa:4312|hsa:3111|hsa:3113|hsa:3115|hsa:535|hsa:4314|hsa:533|hsa:3725|hsa:8741|hsa:1513	http://www.kegg.jp/kegg-bin/show_pathway?hsa05323+hsa:10673+hsa:2353+hsa:529+hsa:526+hsa:10312+hsa:6347+hsa:6374+hsa:2919+hsa:7099+hsa:1437+hsa:3576+hsa:6372+hsa:523+hsa:528+hsa:942+hsa:245972+hsa:8992+hsa:537+hsa:3458+hsa:3600+hsa:51382+hsa:1514+hsa:1435+hsa:3109+hsa:3108+hsa:7422+hsa:9114+hsa:54+hsa:3117+hsa:3118+hsa:3120+hsa:9296+hsa:3552+hsa:3122+hsa:4312+hsa:3111+hsa:3113+hsa:3115+hsa:535+hs…
hsa00190	Oxidative phosphorylation	55	1431	133	7681	7.67308e-10	5.55531e-08	0.413534	ENSG00000154723(ATP5PF)|ENSG00000131100(ATP6V1E1)|ENSG00000124172(ATP5F1E)|ENSG00000147416(ATP6V1B2)|ENSG00000110717(NDUFS8)|ENSG00000110719(TCIRG1)|ENSG00000172115(CYCS)|ENSG00000233954(UQCRHL)|ENSG00000131174(COX7B)|ENSG00000178741(COX5A)|ENSG00000184076(UQCR10)|ENSG00000173660(UQCRH)|ENSG00000127184(COX7C)|ENSG00000126267(COX6B1)|ENSG00000161281(COX7A1)|ENSG00000115944(COX7A2L)|ENSG00000164258…	hsa:522|hsa:529|hsa:514|hsa:526|hsa:4728|hsa:10312|hsa:54205|hsa:440567|hsa:1349|hsa:9377|hsa:29796|hsa:7388|hsa:1350|hsa:1340|hsa:1346|hsa:9167|hsa:4724|hsa:1355|hsa:27068|hsa:523|hsa:528|hsa:245972|hsa:8992|hsa:537|hsa:6392|hsa:1329|hsa:4702|hsa:51382|hsa:1351|hsa:4708|hsa:4706|hsa:9551|hsa:374291|hsa:515|hsa:4712|hsa:4707|hsa:9114|hsa:4726|hsa:4713|hsa:4695|hsa:9296|hsa:4718|hsa:10063|hsa:4696…	http://www.kegg.jp/kegg-bin/show_pathway?hsa00190+hsa:522+hsa:529+hsa:514+hsa:526+hsa:4728+hsa:10312+hsa:54205+hsa:440567+hsa:1349+hsa:9377+hsa:29796+hsa:7388+hsa:1350+hsa:1340+hsa:1346+hsa:9167+hsa:4724+hsa:1355+hsa:27068+hsa:523+hsa:528+hsa:245972+hsa:8992+hsa:537+hsa:6392+hsa:1329+hsa:4702+hsa:51382+hsa:1351+hsa:4708+hsa:4706+hsa:9551+hsa:374291+hsa:515+hsa:4712+hsa:4707+hsa:9114+hsa:4726+hsa:…
hsa05208	Chemical carcinogenesis - reactive oxygen species	71	1431	220	7681	6.18469e-07	3.73143e-05	0.322727	ENSG00000159228(CBR1)|ENSG00000151632(AKR1C2)|ENSG00000198610(AKR1C4)|ENSG00000121691(CAT)|ENSG00000154723(ATP5PF)|ENSG00000005022(SLC25A5)|ENSG00000170345(FOS)|ENSG00000124172(ATP5F1E)|ENSG00000008394(MGST1)|ENSG00000213341(CHUK)|ENSG00000148834(GSTO1)|ENSG00000110717(NDUFS8)|ENSG00000233954(UQCRHL)|ENSG00000100292(HMOX1)|ENSG00000019991(HGF)|ENSG00000133433(GSTT2B)|ENSG00000138061(CYP1B1)|ENSG0…	hsa:873|hsa:1646|hsa:1109|hsa:847|hsa:522|hsa:292|hsa:2353|hsa:514|hsa:4257|hsa:1147|hsa:9446|hsa:4728|hsa:440567|hsa:3162|hsa:3082|hsa:653689|hsa:1545|hsa:1349|hsa:9377|hsa:29796|hsa:7388|hsa:1543|hsa:1350|hsa:1340|hsa:1346|hsa:9167|hsa:4724|hsa:1728|hsa:7416|hsa:4025|hsa:5337|hsa:10861|hsa:6392|hsa:1329|hsa:4702|hsa:6648|hsa:1351|hsa:4708|hsa:4706|hsa:374291|hsa:2947|hsa:515|hsa:4712|hsa:4707|h…	http://www.kegg.jp/kegg-bin/show_pathway?hsa05208+hsa:873+hsa:1646+hsa:1109+hsa:847+hsa:522+hsa:292+hsa:2353+hsa:514+hsa:4257+hsa:1147+hsa:9446+hsa:4728+hsa:440567+hsa:3162+hsa:3082+hsa:653689+hsa:1545+hsa:1349+hsa:9377+hsa:29796+hsa:7388+hsa:1543+hsa:1350+hsa:1340+hsa:1346+hsa:9167+hsa:4724+hsa:1728+hsa:7416+hsa:4025+hsa:5337+hsa:10861+hsa:6392+hsa:1329+hsa:4702+hsa:6648+hsa:1351+hsa:4708+hsa:47…
hsa04146	Peroxisome	34	1431	81	7681	8.89715e-07	4.6011e-05	0.419753	ENSG00000100372(SLC25A17)|ENSG00000107537(PHYH)|ENSG00000121691(CAT)|ENSG00000197601(FAR1)|ENSG00000142655(PEX14)|ENSG00000101473(ACOT8)|ENSG00000156968(MPV17L)|ENSG00000101417(PXMP4)|ENSG00000117305(HMGCL)|ENSG00000115204(MPV17)|ENSG00000101986(ABCD1)|ENSG00000112874(NUDT12)|ENSG00000157326(DHRS4)|ENSG00000104823(ECH1)|ENSG00000162928(PEX13)|ENSG00000140876(NUDT7)|ENSG00000126432(PRDX5)|ENSG0000…	hsa:10478|hsa:5264|hsa:847|hsa:84188|hsa:5195|hsa:10005|hsa:255027|hsa:11264|hsa:3155|hsa:4358|hsa:215|hsa:83594|hsa:10901|hsa:1891|hsa:5194|hsa:283927|hsa:25824|hsa:8528|hsa:2182|hsa:6648|hsa:1962|hsa:10654|hsa:84769|hsa:1384|hsa:8800|hsa:51703|hsa:92960|hsa:51|hsa:3295|hsa:51555|hsa:3417|hsa:5824|hsa:5052|hsa:8540	http://www.kegg.jp/kegg-bin/show_pathway?hsa04146+hsa:10478+hsa:5264+hsa:847+hsa:84188+hsa:5195+hsa:10005+hsa:255027+hsa:11264+hsa:3155+hsa:4358+hsa:215+hsa:83594+hsa:10901+hsa:1891+hsa:5194+hsa:283927+hsa:25824+hsa:8528+hsa:2182+hsa:6648+hsa:1962+hsa:10654+hsa:84769+hsa:1384+hsa:8800+hsa:51703+hsa:92960+hsa:51+hsa:3295+hsa:51555+hsa:3417+hsa:5824+hsa:5052+hsa:8540
hsa05150	Staphylococcus aureus infection	31	1431	76	7681	5.52173e-06	0.000249859	0.407895	ENSG00000197766(CFD)|ENSG00000171860(C3AR1)|ENSG00000169403(PTAFR)|ENSG00000128422(KRT17)|ENSG00000111057(KRT18)|ENSG00000197405(C5AR1)|ENSG00000125730(C3)|ENSG00000169896(ITGAM)|ENSG00000171049(FPR2)|ENSG00000182326(C1S)|ENSG00000159403(C1R)|ENSG00000242574(HLA-DMB)|ENSG00000204257(HLA-DMA)|ENSG00000000971(CFH)|ENSG00000237541(HLA-DQA2)|ENSG00000237541(HLA-DQA2)|ENSG00000232629(HLA-DQB2)|ENSG000…	hsa:1675|hsa:719|hsa:5724|hsa:3872|hsa:3875|hsa:728|hsa:718|hsa:3684|hsa:2358|hsa:716|hsa:715|hsa:3109|hsa:3108|hsa:3075|hsa:3117|hsa:3118|hsa:3120|hsa:3122|hsa:717|hsa:3111|hsa:3113|hsa:3115|hsa:820|hsa:712|hsa:714|hsa:713|hsa:2213|hsa:2212|hsa:3586|hsa:8689|hsa:2209	http://www.kegg.jp/kegg-bin/show_pathway?hsa05150+hsa:1675+hsa:719+hsa:5724+hsa:3872+hsa:3875+hsa:728+hsa:718+hsa:3684+hsa:2358+hsa:716+hsa:715+hsa:3109+hsa:3108+hsa:3075+hsa:3117+hsa:3118+hsa:3120+hsa:3122+hsa:717+hsa:3111+hsa:3113+hsa:3115+hsa:820+hsa:712+hsa:714+hsa:713+hsa:2213+hsa:2212+hsa:3586+hsa:8689+hsa:2209
hsa05152	Tuberculosis	55	1431	171	7681	1.27019e-05	0.0005109	0.321637	ENSG00000185896(LAMP1)|ENSG00000172216(CEBPB)|ENSG00000260314(MRC1)|ENSG00000166523(CLEC4E)|ENSG00000015475(BID)|ENSG00000110719(TCIRG1)|ENSG00000172115(CYCS)|ENSG00000153879(CEBPG)|ENSG00000165025(SYK)|ENSG00000174130(TLR6)|ENSG00000174125(TLR1)|ENSG00000136869(TLR4)|ENSG00000104312(RIPK2)|ENSG00000147614(ATP6V0D2)|ENSG00000096968(JAK2)|ENSG00000102189(EEA1)|ENSG00000005893(LAMP2)|ENSG0000018779…	hsa:3916|hsa:1051|hsa:4360|hsa:26253|hsa:637|hsa:10312|hsa:54205|hsa:1054|hsa:6850|hsa:10333|hsa:7096|hsa:7099|hsa:8767|hsa:245972|hsa:3717|hsa:8411|hsa:3920|hsa:64170|hsa:537|hsa:3458|hsa:718|hsa:3684|hsa:581|hsa:1594|hsa:3109|hsa:3108|hsa:9114|hsa:7879|hsa:929|hsa:30835|hsa:7421|hsa:3117|hsa:3118|hsa:3120|hsa:3552|hsa:1509|hsa:8877|hsa:4261|hsa:3122|hsa:972|hsa:3111|hsa:3113|hsa:3115|hsa:1379|h…	http://www.kegg.jp/kegg-bin/show_pathway?hsa05152+hsa:3916+hsa:1051+hsa:4360+hsa:26253+hsa:637+hsa:10312+hsa:54205+hsa:1054+hsa:6850+hsa:10333+hsa:7096+hsa:7099+hsa:8767+hsa:245972+hsa:3717+hsa:8411+hsa:3920+hsa:64170+hsa:537+hsa:3458+hsa:718+hsa:3684+hsa:581+hsa:1594+hsa:3109+hsa:3108+hsa:9114+hsa:7879+hsa:929+hsa:30835+hsa:7421+hsa:3117+hsa:3118+hsa:3120+hsa:3552+hsa:1509+hsa:8877+hsa:4261+hsa:…
hsa00380	Tryptophan metabolism	20	1431	43	7681	2.65039e-05	0.00095789	0.465116	ENSG00000121691(CAT)|ENSG00000188676(IDO2)|ENSG00000131203(IDO1)|ENSG00000138061(CYP1B1)|ENSG00000140465(CYP1A1)|ENSG00000162882(HAAO)|ENSG00000189221(MAOA)|ENSG00000111275(ALDH2)|ENSG00000104951(IL4I1)|ENSG00000120437(ACAT2)|ENSG00000164904(ALDH7A1)|ENSG00000113790(EHHADH)|ENSG00000115919(KYNU)|ENSG00000002726(AOC1)|ENSG00000138356(AOX1)|ENSG00000072210(ALDH3A2)|ENSG00000127884(ECHS1)|ENSG000001…	hsa:847|hsa:169355|hsa:3620|hsa:1545|hsa:1543|hsa:23498|hsa:4128|hsa:217|hsa:259307|hsa:39|hsa:501|hsa:1962|hsa:8942|hsa:26|hsa:316|hsa:224|hsa:1892|hsa:6999|hsa:3033|hsa:125061	http://www.kegg.jp/kegg-bin/show_pathway?hsa00380+hsa:847+hsa:169355+hsa:3620+hsa:1545+hsa:1543+hsa:23498+hsa:4128+hsa:217+hsa:259307+hsa:39+hsa:501+hsa:1962+hsa:8942+hsa:26+hsa:316+hsa:224+hsa:1892+hsa:6999+hsa:3033+hsa:125061
hsa04216	Ferroptosis	19	1431	40	7681	2.91071e-05	0.00095789	0.475	ENSG00000165168(CYBB)|ENSG00000167468(GPX4)|ENSG00000167996(FTH1)|ENSG00000100292(HMOX1)|ENSG00000001084(GCLC)|ENSG00000140941(MAP1LC3B)|ENSG00000258102(MAP1LC3B2)|ENSG00000057663(ATG5)|ENSG00000151012(SLC7A11)|ENSG00000023909(GCLM)|ENSG00000068366(ACSL4)|ENSG00000087086(FTL)|ENSG00000115107(STEAP3)|ENSG00000141504(SAT2)|ENSG00000197142(ACSL5)|ENSG00000072274(TFRC)|ENSG00000168003(SLC3A2)|ENSG000…	hsa:1536|hsa:2879|hsa:2495|hsa:3162|hsa:2729|hsa:81631|hsa:643246|hsa:9474|hsa:23657|hsa:2730|hsa:2182|hsa:2512|hsa:55240|hsa:112483|hsa:51703|hsa:7037|hsa:6520|hsa:4891|hsa:440738	http://www.kegg.jp/kegg-bin/show_pathway?hsa04216+hsa:1536+hsa:2879+hsa:2495+hsa:3162+hsa:2729+hsa:81631+hsa:643246+hsa:9474+hsa:23657+hsa:2730+hsa:2182+hsa:2512+hsa:55240+hsa:112483+hsa:51703+hsa:7037+hsa:6520+hsa:4891+hsa:440738
hsa04612	Antigen processing and presentation	28	1431	72	7681	4.41461e-05	0.00133174	0.388889	ENSG00000206503(HLA-A)|ENSG00000100600(LGMN)|ENSG00000109971(HSPA8)|ENSG00000100911(PSME2)|ENSG00000111537(IFNG)|ENSG00000204642(HLA-F)|ENSG00000135047(CTSL)|ENSG00000216490(IFI30)|ENSG00000164733(CTSB)|ENSG00000242574(HLA-DMB)|ENSG00000204257(HLA-DMA)|ENSG00000204389(HSPA1A)|ENSG00000204388(HSPA1B)|ENSG00000237541(HLA-DQA2)|ENSG00000237541(HLA-DQA2)|ENSG00000232629(HLA-DQB2)|ENSG00000166710(B2M)…	hsa:3105|hsa:5641|hsa:3312|hsa:5721|hsa:3458|hsa:3134|hsa:1514|hsa:10437|hsa:1508|hsa:3109|hsa:3108|hsa:3303|hsa:3304|hsa:3117|hsa:3118|hsa:3120|hsa:567|hsa:3306|hsa:4261|hsa:3122|hsa:821|hsa:972|hsa:3135|hsa:3111|hsa:3113|hsa:3115|hsa:3310|hsa:1520	http://www.kegg.jp/kegg-bin/show_pathway?hsa04612+hsa:3105+hsa:5641+hsa:3312+hsa:5721+hsa:3458+hsa:3134+hsa:1514+hsa:10437+hsa:1508+hsa:3109+hsa:3108+hsa:3303+hsa:3304+hsa:3117+hsa:3118+hsa:3120+hsa:567+hsa:3306+hsa:4261+hsa:3122+hsa:821+hsa:972+hsa:3135+hsa:3111+hsa:3113+hsa:3115+hsa:3310+hsa:1520
hsa01200	Carbon metabolism	38	1431	111	7681	6.13688e-05	0.00170888	0.342342	ENSG00000131069(ACSS2)|ENSG00000131828(PDHA1)|ENSG00000136143(SUCLA2)|ENSG00000121691(CAT)|ENSG00000184207(PGP)|ENSG00000135069(PSAT1)|ENSG00000146733(PSPH)|ENSG00000120053(GOT1)|ENSG00000173599(PC)|ENSG00000160211(G6PD)|ENSG00000065833(ME1)|ENSG00000101911(PRPS2)|ENSG00000136872(ALDOB)|ENSG00000159399(HK2)|ENSG00000177156(TALDO1)|ENSG00000163541(SUCLG1)|ENSG00000204370(SDHD)|ENSG00000160883(HK3)…	hsa:55902|hsa:5160|hsa:8803|hsa:847|hsa:283871|hsa:29968|hsa:5723|hsa:2805|hsa:5091|hsa:2539|hsa:4199|hsa:5634|hsa:229|hsa:3099|hsa:6888|hsa:8802|hsa:6392|hsa:3101|hsa:39|hsa:226|hsa:84076|hsa:48|hsa:7167|hsa:1892|hsa:2203|hsa:6120|hsa:5315|hsa:51|hsa:5226|hsa:1737|hsa:9563|hsa:10993|hsa:113675|hsa:4190|hsa:3417|hsa:6390|hsa:7086|hsa:2271	http://www.kegg.jp/kegg-bin/show_pathway?hsa01200+hsa:55902+hsa:5160+hsa:8803+hsa:847+hsa:283871+hsa:29968+hsa:5723+hsa:2805+hsa:5091+hsa:2539+hsa:4199+hsa:5634+hsa:229+hsa:3099+hsa:6888+hsa:8802+hsa:6392+hsa:3101+hsa:39+hsa:226+hsa:84076+hsa:48+hsa:7167+hsa:1892+hsa:2203+hsa:6120+hsa:5315+hsa:51+hsa:5226+hsa:1737+hsa:9563+hsa:10993+hsa:113675+hsa:4190+hsa:3417+hsa:6390+hsa:7086+hsa:2271
hsa00480	Glutathione metabolism	22	1431	53	7681	9.16943e-05	0.00221289	0.415094	ENSG00000167468(GPX4)|ENSG00000008394(MGST1)|ENSG00000128965(CHAC1)|ENSG00000148834(GSTO1)|ENSG00000160211(G6PD)|ENSG00000133433(GSTT2B)|ENSG00000001084(GCLC)|ENSG00000117862(TXNDC12)|ENSG00000048392(RRM2B)|ENSG00000023909(GCLM)|ENSG00000211445(GPX3)|ENSG00000102172(SMS)|ENSG00000006625(GGCT)|ENSG00000134202(GSTM3)|ENSG00000143198(MGST3)|ENSG00000104687(GSR)|ENSG00000002549(LAP3)|ENSG00000085871(…	hsa:2879|hsa:4257|hsa:79094|hsa:9446|hsa:2539|hsa:653689|hsa:2729|hsa:51060|hsa:50484|hsa:2730|hsa:2878|hsa:6611|hsa:79017|hsa:2947|hsa:4259|hsa:2936|hsa:51056|hsa:4258|hsa:5226|hsa:2876|hsa:2950|hsa:3417	http://www.kegg.jp/kegg-bin/show_pathway?hsa00480+hsa:2879+hsa:4257+hsa:79094+hsa:9446+hsa:2539+hsa:653689+hsa:2729+hsa:51060+hsa:50484+hsa:2730+hsa:2878+hsa:6611+hsa:79017+hsa:2947+hsa:4259+hsa:2936+hsa:51056+hsa:4258+hsa:5226+hsa:2876+hsa:2950+hsa:3417
hsa04932	Non-alcoholic fatty liver disease	48	1431	153	7681	8.98907e-05	0.00221289	0.313725	ENSG00000185950(IRS2)|ENSG00000171105(INSR)|ENSG00000025434(NR1H3)|ENSG00000170345(FOS)|ENSG00000015475(BID)|ENSG00000110717(NDUFS8)|ENSG00000172115(CYCS)|ENSG00000233954(UQCRHL)|ENSG00000245848(CEBPA)|ENSG00000186350(RXRA)|ENSG00000131174(COX7B)|ENSG00000178741(COX5A)|ENSG00000184076(UQCR10)|ENSG00000173660(UQCRH)|ENSG00000127184(COX7C)|ENSG00000126267(COX6B1)|ENSG00000161281(COX7A1)|ENSG0000011…	hsa:8660|hsa:3643|hsa:10062|hsa:2353|hsa:637|hsa:4728|hsa:54205|hsa:440567|hsa:1050|hsa:6256|hsa:1349|hsa:9377|hsa:29796|hsa:7388|hsa:1350|hsa:1340|hsa:1346|hsa:9167|hsa:4724|hsa:3576|hsa:6392|hsa:1329|hsa:4702|hsa:1351|hsa:4708|hsa:581|hsa:4706|hsa:79602|hsa:374291|hsa:4712|hsa:4707|hsa:4726|hsa:4713|hsa:4695|hsa:3552|hsa:4718|hsa:4696|hsa:1347|hsa:4711|hsa:7384|hsa:5468|hsa:6390|hsa:1649|hsa:53…	http://www.kegg.jp/kegg-bin/show_pathway?hsa04932+hsa:8660+hsa:3643+hsa:10062+hsa:2353+hsa:637+hsa:4728+hsa:54205+hsa:440567+hsa:1050+hsa:6256+hsa:1349+hsa:9377+hsa:29796+hsa:7388+hsa:1350+hsa:1340+hsa:1346+hsa:9167+hsa:4724+hsa:3576+hsa:6392+hsa:1329+hsa:4702+hsa:1351+hsa:4708+hsa:581+hsa:4706+hsa:79602+hsa:374291+hsa:4712+hsa:4707+hsa:4726+hsa:4713+hsa:4695+hsa:3552+hsa:4718+hsa:4696+hsa:1347+h…
hsa05020	Prion disease	74	1431	268	7681	0.000160805	0.00363822	0.276119	ENSG00000100365(NCF4)|ENSG00000165168(CYBB)|ENSG00000154723(ATP5PF)|ENSG00000146592(CREB5)|ENSG00000005022(SLC25A5)|ENSG00000124172(ATP5F1E)|ENSG00000176014(TUBB6)|ENSG00000198785(GRIN3A)|ENSG00000110717(NDUFS8)|ENSG00000172115(CYCS)|ENSG00000233954(UQCRHL)|ENSG00000277791(PSMB3)|ENSG00000136930(PSMB7)|ENSG00000131174(COX7B)|ENSG00000178741(COX5A)|ENSG00000184076(UQCR10)|ENSG00000126067(PSMB2)|EN…	hsa:4689|hsa:1536|hsa:522|hsa:9586|hsa:292|hsa:514|hsa:84617|hsa:116443|hsa:4728|hsa:54205|hsa:440567|hsa:5691|hsa:5695|hsa:1349|hsa:9377|hsa:29796|hsa:5690|hsa:7388|hsa:5693|hsa:1350|hsa:5685|hsa:1340|hsa:1346|hsa:7979|hsa:9167|hsa:4724|hsa:3312|hsa:10488|hsa:7416|hsa:6261|hsa:6392|hsa:1329|hsa:4702|hsa:1351|hsa:4708|hsa:581|hsa:4706|hsa:374291|hsa:515|hsa:4712|hsa:4707|hsa:3915|hsa:10105|hsa:33…	http://www.kegg.jp/kegg-bin/show_pathway?hsa05020+hsa:4689+hsa:1536+hsa:522+hsa:9586+hsa:292+hsa:514+hsa:84617+hsa:116443+hsa:4728+hsa:54205+hsa:440567+hsa:5691+hsa:5695+hsa:1349+hsa:9377+hsa:29796+hsa:5690+hsa:7388+hsa:5693+hsa:1350+hsa:5685+hsa:1340+hsa:1346+hsa:7979+hsa:9167+hsa:4724+hsa:3312+hsa:10488+hsa:7416+hsa:6261+hsa:6392+hsa:1329+hsa:4702+hsa:1351+hsa:4708+hsa:581+hsa:4706+hsa:374291+h…
hsa00520	Amino sugar and nucleotide sugar metabolism	17	1431	38	7681	0.000192758	0.00410462	0.447368	ENSG00000013375(PGM3)|ENSG00000049860(HEXB)|ENSG00000102032(RENBP)|ENSG00000156958(GALK2)|ENSG00000159399(HK2)|ENSG00000197355(UAP1L1)|ENSG00000113552(GNPDA1)|ENSG00000160883(HK3)|ENSG00000109814(UGDH)|ENSG00000133063(CHIT1)|ENSG00000162066(AMDHD2)|ENSG00000213614(HEXA)|ENSG00000117308(GALE)|ENSG00000108479(GALK1)|ENSG00000198380(GFPT1)|ENSG00000144591(GMPPA)|ENSG00000254685(FPGT)	hsa:5238|hsa:3074|hsa:5973|hsa:2585|hsa:3099|hsa:91373|hsa:10007|hsa:3101|hsa:7358|hsa:1118|hsa:51005|hsa:3073|hsa:2582|hsa:2584|hsa:2673|hsa:29926|hsa:8790	http://www.kegg.jp/kegg-bin/show_pathway?hsa00520+hsa:5238+hsa:3074+hsa:5973+hsa:2585+hsa:3099+hsa:91373+hsa:10007+hsa:3101+hsa:7358+hsa:1118+hsa:51005+hsa:3073+hsa:2582+hsa:2584+hsa:2673+hsa:29926+hsa:8790
hsa05140	Leishmaniasis	27	1431	75	7681	0.000274401	0.00551851	0.36	ENSG00000100365(NCF4)|ENSG00000165168(CYBB)|ENSG00000170345(FOS)|ENSG00000136869(TLR4)|ENSG00000096968(JAK2)|ENSG00000111537(IFNG)|ENSG00000125730(C3)|ENSG00000169896(ITGAM)|ENSG00000242574(HLA-DMB)|ENSG00000204257(HLA-DMA)|ENSG00000111679(PTPN6)|ENSG00000237541(HLA-DQA2)|ENSG00000237541(HLA-DQA2)|ENSG00000232629(HLA-DQB2)|ENSG00000115008(IL1A)|ENSG00000204287(HLA-DRA)|ENSG00000158517(NCF1)|ENSG0…	hsa:4689|hsa:1536|hsa:2353|hsa:7099|hsa:3717|hsa:3458|hsa:718|hsa:3684|hsa:3109|hsa:3108|hsa:5777|hsa:3117|hsa:3118|hsa:3120|hsa:3552|hsa:3122|hsa:653361|hsa:3111|hsa:3113|hsa:3115|hsa:1379|hsa:6772|hsa:4688|hsa:2212|hsa:3586|hsa:3725|hsa:2209	http://www.kegg.jp/kegg-bin/show_pathway?hsa05140+hsa:4689+hsa:1536+hsa:2353+hsa:7099+hsa:3717+hsa:3458+hsa:718+hsa:3684+hsa:3109+hsa:3108+hsa:5777+hsa:3117+hsa:3118+hsa:3120+hsa:3552+hsa:3122+hsa:653361+hsa:3111+hsa:3113+hsa:3115+hsa:1379+hsa:6772+hsa:4688+hsa:2212+hsa:3586+hsa:3725+hsa:2209
hsa04130	SNARE interactions in vesicular transport	15	1431	33	7681	0.000369736	0.00704445	0.454545	ENSG00000049245(VAMP3)|ENSG00000105829(BET1)|ENSG00000079950(STX7)|ENSG00000166900(STX3)|ENSG00000099940(SNAP29)|ENSG00000168818(STX18)|ENSG00000135604(STX11)|ENSG00000118640(VAMP8)|ENSG00000099365(STX1B)|ENSG00000103496(STX4)|ENSG00000168899(VAMP5)|ENSG00000265808(SEC22B)|ENSG00000100568(VTI1B)|ENSG00000117533(VAMP4)|ENSG00000170310(STX8)	hsa:9341|hsa:10282|hsa:8417|hsa:6809|hsa:9342|hsa:53407|hsa:8676|hsa:8673|hsa:112755|hsa:6810|hsa:10791|hsa:9554|hsa:10490|hsa:8674|hsa:9482	http://www.kegg.jp/kegg-bin/show_pathway?hsa04130+hsa:9341+hsa:10282+hsa:8417+hsa:6809+hsa:9342+hsa:53407+hsa:8676+hsa:8673+hsa:112755+hsa:6810+hsa:10791+hsa:9554+hsa:10490+hsa:8674+hsa:9482
hsa05310	Asthma	14	1431	30	7681	0.000414465	0.00750181	0.466667	ENSG00000101017(CD40)|ENSG00000145839(IL9)|ENSG00000164399(IL3)|ENSG00000242574(HLA-DMB)|ENSG00000204257(HLA-DMA)|ENSG00000237541(HLA-DQA2)|ENSG00000237541(HLA-DQA2)|ENSG00000232629(HLA-DQB2)|ENSG00000204287(HLA-DRA)|ENSG00000204252(HLA-DOA)|ENSG00000231389(HLA-DPA1)|ENSG00000223865(HLA-DPB1)|ENSG00000158869(FCER1G)|ENSG00000136634(IL10)	hsa:958|hsa:3578|hsa:3562|hsa:3109|hsa:3108|hsa:3117|hsa:3118|hsa:3120|hsa:3122|hsa:3111|hsa:3113|hsa:3115|hsa:2207|hsa:3586	http://www.kegg.jp/kegg-bin/show_pathway?hsa05310+hsa:958+hsa:3578+hsa:3562+hsa:3109+hsa:3108+hsa:3117+hsa:3118+hsa:3120+hsa:3122+hsa:3111+hsa:3113+hsa:3115+hsa:2207+hsa:3586
hsa05330	Allograft rejection	16	1431	37	7681	0.000475042	0.00818881	0.432432	ENSG00000206503(HLA-A)|ENSG00000101017(CD40)|ENSG00000114013(CD86)|ENSG00000111537(IFNG)|ENSG00000204642(HLA-F)|ENSG00000242574(HLA-DMB)|ENSG00000204257(HLA-DMA)|ENSG00000237541(HLA-DQA2)|ENSG00000237541(HLA-DQA2)|ENSG00000232629(HLA-DQB2)|ENSG00000204287(HLA-DRA)|ENSG00000204632(HLA-G)|ENSG00000204252(HLA-DOA)|ENSG00000231389(HLA-DPA1)|ENSG00000223865(HLA-DPB1)|ENSG00000136634(IL10)	hsa:3105|hsa:958|hsa:942|hsa:3458|hsa:3134|hsa:3109|hsa:3108|hsa:3117|hsa:3118|hsa:3120|hsa:3122|hsa:3135|hsa:3111|hsa:3113|hsa:3115|hsa:3586	http://www.kegg.jp/kegg-bin/show_pathway?hsa05330+hsa:3105+hsa:958+hsa:942+hsa:3458+hsa:3134+hsa:3109+hsa:3108+hsa:3117+hsa:3118+hsa:3120+hsa:3122+hsa:3135+hsa:3111+hsa:3113+hsa:3115+hsa:3586
hsa04672	Intestinal immune network for IgA production	19	1431	48	7681	0.000561544	0.00883821	0.395833	ENSG00000134470(IL15RA)|ENSG00000160223(ICOSLG)|ENSG00000102524(TNFSF13B)|ENSG00000101017(CD40)|ENSG00000114013(CD86)|ENSG00000164136(IL15)|ENSG00000242574(HLA-DMB)|ENSG00000204257(HLA-DMA)|ENSG00000237541(HLA-DQA2)|ENSG00000237541(HLA-DQA2)|ENSG00000232629(HLA-DQB2)|ENSG00000111321(LTBR)|ENSG00000204287(HLA-DRA)|ENSG00000099866(MADCAM1)|ENSG00000204252(HLA-DOA)|ENSG00000231389(HLA-DPA1)|ENSG0000…	hsa:3601|hsa:23308|hsa:10673|hsa:958|hsa:942|hsa:3600|hsa:3109|hsa:3108|hsa:3117|hsa:3118|hsa:3120|hsa:4055|hsa:3122|hsa:8174|hsa:3111|hsa:3113|hsa:3115|hsa:3586|hsa:8741	http://www.kegg.jp/kegg-bin/show_pathway?hsa04672+hsa:3601+hsa:23308+hsa:10673+hsa:958+hsa:942+hsa:3600+hsa:3109+hsa:3108+hsa:3117+hsa:3118+hsa:3120+hsa:4055+hsa:3122+hsa:8174+hsa:3111+hsa:3113+hsa:3115+hsa:3586+hsa:8741
hsa04979	Cholesterol metabolism	19	1431	48	7681	0.000561544	0.00883821	0.395833	ENSG00000100300(TSPO)|ENSG00000101558(VAPA)|ENSG00000163956(LRPAP1)|ENSG00000100979(PLTP)|ENSG00000167910(CYP7A1)|ENSG00000119655(NPC2)|ENSG00000213585(VDAC1)|ENSG00000123384(LRP1)|ENSG00000134243(SORT1)|ENSG00000167772(ANGPTL4)|ENSG00000107798(LIPA)|ENSG00000144959(NCEH1)|ENSG00000057252(SOAT1)|ENSG00000130203(APOE)|ENSG00000130208(APOC1)|ENSG00000234906(APOC2)|ENSG00000073060(SCARB1)|ENSG000001…	hsa:706|hsa:9218|hsa:4043|hsa:5360|hsa:1581|hsa:10577|hsa:7416|hsa:4035|hsa:6272|hsa:51129|hsa:3988|hsa:57552|hsa:6646|hsa:348|hsa:341|hsa:344|hsa:949|hsa:1593|hsa:64240	http://www.kegg.jp/kegg-bin/show_pathway?hsa04979+hsa:706+hsa:9218+hsa:4043+hsa:5360+hsa:1581+hsa:10577+hsa:7416+hsa:4035+hsa:6272+hsa:51129+hsa:3988+hsa:57552+hsa:6646+hsa:348+hsa:341+hsa:344+hsa:949+hsa:1593+hsa:64240
hsa05012	Parkinson disease	70	1431	261	7681	0.000596329	0.00899463	0.268199	ENSG00000100348(TXN2)|ENSG00000148482(SLC39A12)|ENSG00000154723(ATP5PF)|ENSG00000005022(SLC25A5)|ENSG00000036565(SLC18A1)|ENSG00000124172(ATP5F1E)|ENSG00000176014(TUBB6)|ENSG00000136810(TXN)|ENSG00000110717(NDUFS8)|ENSG00000172115(CYCS)|ENSG00000233954(UQCRHL)|ENSG00000277791(PSMB3)|ENSG00000154277(UCHL1)|ENSG00000136930(PSMB7)|ENSG00000131174(COX7B)|ENSG00000178741(COX5A)|ENSG00000184076(UQCR10)…	hsa:25828|hsa:221074|hsa:522|hsa:292|hsa:6570|hsa:514|hsa:84617|hsa:7295|hsa:4728|hsa:54205|hsa:440567|hsa:5691|hsa:7345|hsa:5695|hsa:1349|hsa:9377|hsa:29796|hsa:5690|hsa:7388|hsa:5693|hsa:1350|hsa:5685|hsa:1340|hsa:1346|hsa:7979|hsa:9167|hsa:4724|hsa:4128|hsa:201266|hsa:7416|hsa:6392|hsa:1329|hsa:4702|hsa:1351|hsa:4708|hsa:55630|hsa:581|hsa:4706|hsa:374291|hsa:515|hsa:4712|hsa:4707|hsa:10105|hsa…	http://www.kegg.jp/kegg-bin/show_pathway?hsa05012+hsa:25828+hsa:221074+hsa:522+hsa:292+hsa:6570+hsa:514+hsa:84617+hsa:7295+hsa:4728+hsa:54205+hsa:440567+hsa:5691+hsa:7345+hsa:5695+hsa:1349+hsa:9377+hsa:29796+hsa:5690+hsa:7388+hsa:5693+hsa:1350+hsa:5685+hsa:1340+hsa:1346+hsa:7979+hsa:9167+hsa:4724+hsa:4128+hsa:201266+hsa:7416+hsa:6392+hsa:1329+hsa:4702+hsa:1351+hsa:4708+hsa:55630+hsa:581+hsa:4706+…
hsa01240	Biosynthesis of cofactors	42	1431	141	7681	0.000810567	0.0108676	0.297872	ENSG00000160209(PDXK)|ENSG00000060982(BCAT1)|ENSG00000124615(MOCS1)|ENSG00000135069(PSAT1)|ENSG00000173614(NMNAT1)|ENSG00000196715(VKORC1L1)|ENSG00000188676(IDO2)|ENSG00000103485(QPRT)|ENSG00000135002(RFK)|ENSG00000131203(IDO1)|ENSG00000001084(GCLC)|ENSG00000127125(PPCS)|ENSG00000162882(HAAO)|ENSG00000181019(NQO1)|ENSG00000111275(ALDH2)|ENSG00000115486(GGCX)|ENSG00000014919(COX15)|ENSG00000162433…	hsa:8566|hsa:586|hsa:4337|hsa:29968|hsa:64802|hsa:154807|hsa:169355|hsa:23475|hsa:55312|hsa:3620|hsa:2729|hsa:79717|hsa:23498|hsa:1728|hsa:217|hsa:2677|hsa:1355|hsa:205|hsa:79001|hsa:2730|hsa:6697|hsa:122622|hsa:8942|hsa:158067|hsa:8836|hsa:84274|hsa:7358|hsa:224|hsa:93100|hsa:55163|hsa:6999|hsa:27235|hsa:8630|hsa:211|hsa:51805|hsa:102157402|hsa:125061|hsa:10797|hsa:65220|hsa:10327|hsa:204|hsa:29…	http://www.kegg.jp/kegg-bin/show_pathway?hsa01240+hsa:8566+hsa:586+hsa:4337+hsa:29968+hsa:64802+hsa:154807+hsa:169355+hsa:23475+hsa:55312+hsa:3620+hsa:2729+hsa:79717+hsa:23498+hsa:1728+hsa:217+hsa:2677+hsa:1355+hsa:205+hsa:79001+hsa:2730+hsa:6697+hsa:122622+hsa:8942+hsa:158067+hsa:8836+hsa:84274+hsa:7358+hsa:224+hsa:93100+hsa:55163+hsa:6999+hsa:27235+hsa:8630+hsa:211+hsa:51805+hsa:102157402+hsa:1…
hsa04940	Type I diabetes mellitus	17	1431	42	7681	0.000803643	0.0108676	0.404762	ENSG00000003147(ICA1)|ENSG00000206503(HLA-A)|ENSG00000114013(CD86)|ENSG00000111537(IFNG)|ENSG00000204642(HLA-F)|ENSG00000242574(HLA-DMB)|ENSG00000204257(HLA-DMA)|ENSG00000237541(HLA-DQA2)|ENSG00000237541(HLA-DQA2)|ENSG00000232629(HLA-DQB2)|ENSG00000115008(IL1A)|ENSG00000128683(GAD1)|ENSG00000204287(HLA-DRA)|ENSG00000204632(HLA-G)|ENSG00000204252(HLA-DOA)|ENSG00000231389(HLA-DPA1)|ENSG00000223865(…	hsa:3382|hsa:3105|hsa:942|hsa:3458|hsa:3134|hsa:3109|hsa:3108|hsa:3117|hsa:3118|hsa:3120|hsa:3552|hsa:2571|hsa:3122|hsa:3135|hsa:3111|hsa:3113|hsa:3115	http://www.kegg.jp/kegg-bin/show_pathway?hsa04940+hsa:3382+hsa:3105+hsa:942+hsa:3458+hsa:3134+hsa:3109+hsa:3108+hsa:3117+hsa:3118+hsa:3120+hsa:3552+hsa:2571+hsa:3122+hsa:3135+hsa:3111+hsa:3113+hsa:3115
hsa05110	Vibrio cholerae infection	19	1431	49	7681	0.000759344	0.0108676	0.387755	ENSG00000100196(KDELR3)|ENSG00000131100(ATP6V1E1)|ENSG00000147416(ATP6V1B2)|ENSG00000106803(SEC61B)|ENSG00000110719(TCIRG1)|ENSG00000114573(ATP6V1A)|ENSG00000155097(ATP6V1C1)|ENSG00000147614(ATP6V0D2)|ENSG00000113732(ATP6V0E1)|ENSG00000071553(ATP6AP1)|ENSG00000100554(ATP6V1D)|ENSG00000105438(KDELR1)|ENSG00000159720(ATP6V0D1)|ENSG00000136240(KDELR2)|ENSG00000128524(ATP6V1F)|ENSG00000104067(TJP1)|E…	hsa:11015|hsa:529|hsa:526|hsa:10952|hsa:10312|hsa:523|hsa:528|hsa:245972|hsa:8992|hsa:537|hsa:51382|hsa:10945|hsa:9114|hsa:11014|hsa:9296|hsa:7082|hsa:535|hsa:533|hsa:109	http://www.kegg.jp/kegg-bin/show_pathway?hsa05110+hsa:11015+hsa:529+hsa:526+hsa:10952+hsa:10312+hsa:523+hsa:528+hsa:245972+hsa:8992+hsa:537+hsa:51382+hsa:10945+hsa:9114+hsa:11014+hsa:9296+hsa:7082+hsa:535+hsa:533+hsa:109
hsa04966	Collecting duct acid secretion	12	1431	26	7681	0.00120931	0.0156347	0.461538	ENSG00000131100(ATP6V1E1)|ENSG00000147416(ATP6V1B2)|ENSG00000110719(TCIRG1)|ENSG00000104267(CA2)|ENSG00000114573(ATP6V1A)|ENSG00000155097(ATP6V1C1)|ENSG00000147614(ATP6V0D2)|ENSG00000113732(ATP6V0E1)|ENSG00000100554(ATP6V1D)|ENSG00000159720(ATP6V0D1)|ENSG00000128524(ATP6V1F)|ENSG00000033627(ATP6V0A1)	hsa:529|hsa:526|hsa:10312|hsa:760|hsa:523|hsa:528|hsa:245972|hsa:8992|hsa:51382|hsa:9114|hsa:9296|hsa:535	http://www.kegg.jp/kegg-bin/show_pathway?hsa04966+hsa:529+hsa:526+hsa:10312+hsa:760+hsa:523+hsa:528+hsa:245972+hsa:8992+hsa:51382+hsa:9114+hsa:9296+hsa:535
hsa05016	Huntington disease	77	1431	300	7681	0.00130757	0.016322	0.256667	ENSG00000198959(TGM2)|ENSG00000099817(POLR2E)|ENSG00000154723(ATP5PF)|ENSG00000146592(CREB5)|ENSG00000005022(SLC25A5)|ENSG00000158486(DNAH3)|ENSG00000100246(DNAL4)|ENSG00000124172(ATP5F1E)|ENSG00000176014(TUBB6)|ENSG00000148572(NRBF2)|ENSG00000110717(NDUFS8)|ENSG00000172115(CYCS)|ENSG00000233954(UQCRHL)|ENSG00000277791(PSMB3)|ENSG00000127946(HIP1)|ENSG00000100142(POLR2F)|ENSG00000131966(ACTR10)|E…	hsa:7052|hsa:5434|hsa:522|hsa:9586|hsa:292|hsa:55567|hsa:10126|hsa:514|hsa:84617|hsa:29982|hsa:4728|hsa:54205|hsa:440567|hsa:5691|hsa:3092|hsa:5435|hsa:55860|hsa:5695|hsa:1349|hsa:9377|hsa:7802|hsa:29796|hsa:5690|hsa:7388|hsa:5693|hsa:1350|hsa:5685|hsa:1340|hsa:1346|hsa:7979|hsa:9167|hsa:4724|hsa:3066|hsa:10488|hsa:7416|hsa:2878|hsa:6392|hsa:6506|hsa:1329|hsa:4702|hsa:6648|hsa:1175|hsa:1351|hsa:2…	http://www.kegg.jp/kegg-bin/show_pathway?hsa05016+hsa:7052+hsa:5434+hsa:522+hsa:9586+hsa:292+hsa:55567+hsa:10126+hsa:514+hsa:84617+hsa:29982+hsa:4728+hsa:54205+hsa:440567+hsa:5691+hsa:3092+hsa:5435+hsa:55860+hsa:5695+hsa:1349+hsa:9377+hsa:7802+hsa:29796+hsa:5690+hsa:7388+hsa:5693+hsa:1350+hsa:5685+hsa:1340+hsa:1346+hsa:7979+hsa:9167+hsa:4724+hsa:3066+hsa:10488+hsa:7416+hsa:2878+hsa:6392+hsa:6506+…
hsa00511	Other glycan degradation	9	1431	17	7681	0.00151267	0.0176641	0.529412	ENSG00000170266(GLB1)|ENSG00000049860(HEXB)|ENSG00000001036(FUCA2)|ENSG00000038002(AGA)|ENSG00000204386(NEU1)|ENSG00000213614(HEXA)|ENSG00000109323(MANBA)|ENSG00000177628(GBA)|ENSG00000179163(FUCA1)	hsa:2720|hsa:3074|hsa:2519|hsa:175|hsa:4758|hsa:3073|hsa:4126|hsa:2629|hsa:2517	http://www.kegg.jp/kegg-bin/show_pathway?hsa00511+hsa:2720+hsa:3074+hsa:2519+hsa:175+hsa:4758+hsa:3073+hsa:4126+hsa:2629+hsa:2517
hsa00620	Pyruvate metabolism	17	1431	44	7681	0.00148856	0.0176641	0.386364	ENSG00000131069(ACSS2)|ENSG00000131828(PDHA1)|ENSG00000173599(PC)|ENSG00000171989(LDHAL6B)|ENSG00000065833(ME1)|ENSG00000111275(ALDH2)|ENSG00000100889(PCK2)|ENSG00000120437(ACAT2)|ENSG00000164904(ALDH7A1)|ENSG00000063854(HAGH)|ENSG00000166816(LDHD)|ENSG00000072210(ALDH3A2)|ENSG00000067225(PKM)|ENSG00000150768(DLAT)|ENSG00000014641(MDH1)|ENSG00000117448(AKR1A1)|ENSG00000091483(FH)	hsa:55902|hsa:5160|hsa:5091|hsa:92483|hsa:4199|hsa:217|hsa:5106|hsa:39|hsa:501|hsa:3029|hsa:197257|hsa:224|hsa:5315|hsa:1737|hsa:4190|hsa:10327|hsa:2271	http://www.kegg.jp/kegg-bin/show_pathway?hsa00620+hsa:55902+hsa:5160+hsa:5091+hsa:92483+hsa:4199+hsa:217+hsa:5106+hsa:39+hsa:501+hsa:3029+hsa:197257+hsa:224+hsa:5315+hsa:1737+hsa:4190+hsa:10327+hsa:2271
hsa04721	Synaptic vesicle cycle	25	1431	75	7681	0.00164594	0.0180555	0.333333	ENSG00000132639(SNAP25)|ENSG00000131100(ATP6V1E1)|ENSG00000036565(SLC18A1)|ENSG00000147416(ATP6V1B2)|ENSG00000110719(TCIRG1)|ENSG00000166900(STX3)|ENSG00000114573(ATP6V1A)|ENSG00000155097(ATP6V1C1)|ENSG00000099365(STX1B)|ENSG00000147614(ATP6V0D2)|ENSG00000113732(ATP6V0E1)|ENSG00000110436(SLC1A2)|ENSG00000100554(ATP6V1D)|ENSG00000042753(AP2S1)|ENSG00000198722(UNC13B)|ENSG00000122705(CLTA)|ENSG0000…	hsa:6616|hsa:529|hsa:6570|hsa:526|hsa:10312|hsa:6809|hsa:523|hsa:528|hsa:112755|hsa:245972|hsa:8992|hsa:6506|hsa:51382|hsa:1175|hsa:10497|hsa:1211|hsa:9114|hsa:57030|hsa:9296|hsa:440279|hsa:6507|hsa:23025|hsa:535|hsa:6539|hsa:533	http://www.kegg.jp/kegg-bin/show_pathway?hsa04721+hsa:6616+hsa:529+hsa:6570+hsa:526+hsa:10312+hsa:6809+hsa:523+hsa:528+hsa:112755+hsa:245972+hsa:8992+hsa:6506+hsa:51382+hsa:1175+hsa:10497+hsa:1211+hsa:9114+hsa:57030+hsa:9296+hsa:440279+hsa:6507+hsa:23025+hsa:535+hsa:6539+hsa:533
hsa05416	Viral myocarditis	23	1431	67	7681	0.00160154	0.0180555	0.343284	ENSG00000101680(LAMA1)|ENSG00000206503(HLA-A)|ENSG00000015475(BID)|ENSG00000172115(CYCS)|ENSG00000110092(CCND1)|ENSG00000092054(MYH7)|ENSG00000101017(CD40)|ENSG00000114013(CD86)|ENSG00000172164(SNTB1)|ENSG00000197616(MYH6)|ENSG00000204642(HLA-F)|ENSG00000242574(HLA-DMB)|ENSG00000204257(HLA-DMA)|ENSG00000237541(HLA-DQA2)|ENSG00000237541(HLA-DQA2)|ENSG00000232629(HLA-DQB2)|ENSG00000123096(SSPN)|ENS…	hsa:284217|hsa:3105|hsa:637|hsa:54205|hsa:595|hsa:4625|hsa:958|hsa:942|hsa:6641|hsa:4624|hsa:3134|hsa:3109|hsa:3108|hsa:3117|hsa:3118|hsa:3120|hsa:8082|hsa:3122|hsa:27|hsa:3135|hsa:3111|hsa:3113|hsa:3115	http://www.kegg.jp/kegg-bin/show_pathway?hsa05416+hsa:284217+hsa:3105+hsa:637+hsa:54205+hsa:595+hsa:4625+hsa:958+hsa:942+hsa:6641+hsa:4624+hsa:3134+hsa:3109+hsa:3108+hsa:3117+hsa:3118+hsa:3120+hsa:8082+hsa:3122+hsa:27+hsa:3135+hsa:3111+hsa:3113+hsa:3115
hsa04714	Thermogenesis	61	1431	230	7681	0.00175409	0.0186759	0.265217	ENSG00000101493(ZNF516)|ENSG00000154723(ATP5PF)|ENSG00000146592(CREB5)|ENSG00000124172(ATP5F1E)|ENSG00000110717(NDUFS8)|ENSG00000233954(UQCRHL)|ENSG00000117676(RPS6KA1)|ENSG00000131174(COX7B)|ENSG00000178741(COX5A)|ENSG00000184076(UQCR10)|ENSG00000173660(UQCRH)|ENSG00000127184(COX7C)|ENSG00000126267(COX6B1)|ENSG00000161281(COX7A1)|ENSG00000115944(COX7A2L)|ENSG00000164258(NDUFS4)|ENSG00000183978(C…	hsa:9658|hsa:522|hsa:9586|hsa:514|hsa:4728|hsa:440567|hsa:6195|hsa:1349|hsa:9377|hsa:29796|hsa:7388|hsa:1350|hsa:1340|hsa:1346|hsa:9167|hsa:4724|hsa:28958|hsa:1355|hsa:10488|hsa:6009|hsa:65260|hsa:114|hsa:493753|hsa:6392|hsa:1329|hsa:2182|hsa:4702|hsa:1351|hsa:4708|hsa:4706|hsa:9551|hsa:374291|hsa:6604|hsa:515|hsa:4712|hsa:4707|hsa:84335|hsa:788|hsa:1374|hsa:4726|hsa:4713|hsa:4695|hsa:51703|hsa:5…	http://www.kegg.jp/kegg-bin/show_pathway?hsa04714+hsa:9658+hsa:522+hsa:9586+hsa:514+hsa:4728+hsa:440567+hsa:6195+hsa:1349+hsa:9377+hsa:29796+hsa:7388+hsa:1350+hsa:1340+hsa:1346+hsa:9167+hsa:4724+hsa:28958+hsa:1355+hsa:10488+hsa:6009+hsa:65260+hsa:114+hsa:493753+hsa:6392+hsa:1329+hsa:2182+hsa:4702+hsa:1351+hsa:4708+hsa:4706+hsa:9551+hsa:374291+hsa:6604+hsa:515+hsa:4712+hsa:4707+hsa:84335+hsa:788+h…
hsa05120	Epithelial cell signaling in Helicobacter pylori infection	23	1431	68	7681	0.00200177	0.020704	0.338235	ENSG00000131100(ATP6V1E1)|ENSG00000147416(ATP6V1B2)|ENSG00000213341(CHUK)|ENSG00000110719(TCIRG1)|ENSG00000163739(CXCL1)|ENSG00000169429(CXCL8)|ENSG00000114573(ATP6V1A)|ENSG00000155097(ATP6V1C1)|ENSG00000147614(ATP6V0D2)|ENSG00000113732(ATP6V0E1)|ENSG00000071553(ATP6AP1)|ENSG00000149269(PAK1)|ENSG00000100554(ATP6V1D)|ENSG00000180871(CXCR2)|ENSG00000105976(MET)|ENSG00000159720(ATP6V0D1)|ENSG000001…	hsa:529|hsa:526|hsa:1147|hsa:10312|hsa:2919|hsa:3576|hsa:523|hsa:528|hsa:245972|hsa:8992|hsa:537|hsa:5058|hsa:51382|hsa:3579|hsa:4233|hsa:9114|hsa:1839|hsa:9296|hsa:7082|hsa:535|hsa:533|hsa:3725|hsa:50848	http://www.kegg.jp/kegg-bin/show_pathway?hsa05120+hsa:529+hsa:526+hsa:1147+hsa:10312+hsa:2919+hsa:3576+hsa:523+hsa:528+hsa:245972+hsa:8992+hsa:537+hsa:5058+hsa:51382+hsa:3579+hsa:4233+hsa:9114+hsa:1839+hsa:9296+hsa:7082+hsa:535+hsa:533+hsa:3725+hsa:50848
hsa00600	Sphingolipid metabolism	19	1431	53	7681	0.0022566	0.0226913	0.358491	ENSG00000141934(PLPP2)|ENSG00000170266(GLB1)|ENSG00000168350(DEGS2)|ENSG00000049860(HEXB)|ENSG00000162407(PLPP3)|ENSG00000090054(SPTLC1)|ENSG00000102393(GLA)|ENSG00000135587(SMPD2)|ENSG00000104763(ASAH1)|ENSG00000135454(B4GALNT1)|ENSG00000196743(GM2A)|ENSG00000197746(PSAP)|ENSG00000204386(NEU1)|ENSG00000148154(UGCG)|ENSG00000176170(SPHK1)|ENSG00000213614(HEXA)|ENSG00000078124(ACER3)|ENSG000001776…	hsa:8612|hsa:2720|hsa:123099|hsa:3074|hsa:8613|hsa:10558|hsa:2717|hsa:6610|hsa:427|hsa:2583|hsa:2760|hsa:5660|hsa:4758|hsa:7357|hsa:8877|hsa:3073|hsa:55331|hsa:2629|hsa:166929	http://www.kegg.jp/kegg-bin/show_pathway?hsa00600+hsa:8612+hsa:2720+hsa:123099+hsa:3074+hsa:8613+hsa:10558+hsa:2717+hsa:6610+hsa:427+hsa:2583+hsa:2760+hsa:5660+hsa:4758+hsa:7357+hsa:8877+hsa:3073+hsa:55331+hsa:2629+hsa:166929
hsa00130	Ubiquinone and other terpenoid-quinone biosynthesis	7	1431	12	7681	0.0025289	0.0247423	0.583333	ENSG00000196715(VKORC1L1)|ENSG00000181019(NQO1)|ENSG00000115486(GGCX)|ENSG00000167397(VKORC1)|ENSG00000110871(COQ5)|ENSG00000173085(COQ2)|ENSG00000132423(COQ3)	hsa:154807|hsa:1728|hsa:2677|hsa:79001|hsa:84274|hsa:27235|hsa:51805	http://www.kegg.jp/kegg-bin/show_pathway?hsa00130+hsa:154807+hsa:1728+hsa:2677+hsa:79001+hsa:84274+hsa:27235+hsa:51805
hsa00020	Citrate cycle (TCA cycle)	12	1431	28	7681	0.00264032	0.0251525	0.428571	ENSG00000131828(PDHA1)|ENSG00000136143(SUCLA2)|ENSG00000173599(PC)|ENSG00000100889(PCK2)|ENSG00000163541(SUCLG1)|ENSG00000204370(SDHD)|ENSG00000122729(ACO1)|ENSG00000150768(DLAT)|ENSG00000014641(MDH1)|ENSG00000138413(IDH1)|ENSG00000117118(SDHB)|ENSG00000091483(FH)	hsa:5160|hsa:8803|hsa:5091|hsa:5106|hsa:8802|hsa:6392|hsa:48|hsa:1737|hsa:4190|hsa:3417|hsa:6390|hsa:2271	http://www.kegg.jp/kegg-bin/show_pathway?hsa00020+hsa:5160+hsa:8803+hsa:5091+hsa:5106+hsa:8802+hsa:6392+hsa:48+hsa:1737+hsa:4190+hsa:3417+hsa:6390+hsa:2271
hsa03320	PPAR signaling pathway	23	1431	70	7681	0.00306099	0.0284122	0.328571	ENSG00000173391(OLR1)|ENSG00000025434(NR1H3)|ENSG00000099194(SCD)|ENSG00000100979(PLTP)|ENSG00000065833(ME1)|ENSG00000121769(FABP3)|ENSG00000147872(PLIN2)|ENSG00000186350(RXRA)|ENSG00000170323(FABP4)|ENSG00000167910(CYP7A1)|ENSG00000198814(GK)|ENSG00000100889(PCK2)|ENSG00000068366(ACSL4)|ENSG00000113790(EHHADH)|ENSG00000110090(CPT1A)|ENSG00000167772(ANGPTL4)|ENSG00000197142(ACSL5)|ENSG00000196611…	hsa:4973|hsa:10062|hsa:6319|hsa:5360|hsa:4199|hsa:2170|hsa:123|hsa:6256|hsa:2167|hsa:1581|hsa:2710|hsa:5106|hsa:2182|hsa:1962|hsa:1374|hsa:51129|hsa:51703|hsa:4312|hsa:51|hsa:7316|hsa:5468|hsa:1593|hsa:1622	http://www.kegg.jp/kegg-bin/show_pathway?hsa03320+hsa:4973+hsa:10062+hsa:6319+hsa:5360+hsa:4199+hsa:2170+hsa:123+hsa:6256+hsa:2167+hsa:1581+hsa:2710+hsa:5106+hsa:2182+hsa:1962+hsa:1374+hsa:51129+hsa:51703+hsa:4312+hsa:51+hsa:7316+hsa:5468+hsa:1593+hsa:1622
hsa05415	Diabetic cardiomyopathy	53	1431	200	7681	0.00346562	0.0313638	0.265	ENSG00000100365(NCF4)|ENSG00000131828(PDHA1)|ENSG00000165168(CYBB)|ENSG00000154723(ATP5PF)|ENSG00000171105(INSR)|ENSG00000005022(SLC25A5)|ENSG00000124172(ATP5F1E)|ENSG00000110717(NDUFS8)|ENSG00000160211(G6PD)|ENSG00000233954(UQCRHL)|ENSG00000087245(MMP2)|ENSG00000004799(PDK4)|ENSG00000131174(COX7B)|ENSG00000178741(COX5A)|ENSG00000184076(UQCR10)|ENSG00000173660(UQCRH)|ENSG00000127184(COX7C)|ENSG00…	hsa:4689|hsa:5160|hsa:1536|hsa:522|hsa:3643|hsa:292|hsa:514|hsa:4728|hsa:2539|hsa:440567|hsa:4313|hsa:5166|hsa:1349|hsa:9377|hsa:29796|hsa:7388|hsa:1350|hsa:1340|hsa:1346|hsa:9167|hsa:4724|hsa:7416|hsa:6392|hsa:1329|hsa:4702|hsa:1351|hsa:4708|hsa:4706|hsa:374291|hsa:515|hsa:4712|hsa:4707|hsa:10105|hsa:2936|hsa:4726|hsa:5331|hsa:4713|hsa:4695|hsa:1509|hsa:653361|hsa:4718|hsa:4696|hsa:1347|hsa:4711…	http://www.kegg.jp/kegg-bin/show_pathway?hsa05415+hsa:4689+hsa:5160+hsa:1536+hsa:522+hsa:3643+hsa:292+hsa:514+hsa:4728+hsa:2539+hsa:440567+hsa:4313+hsa:5166+hsa:1349+hsa:9377+hsa:29796+hsa:7388+hsa:1350+hsa:1340+hsa:1346+hsa:9167+hsa:4724+hsa:7416+hsa:6392+hsa:1329+hsa:4702+hsa:1351+hsa:4708+hsa:4706+hsa:374291+hsa:515+hsa:4712+hsa:4707+hsa:10105+hsa:2936+hsa:4726+hsa:5331+hsa:4713+hsa:4695+hsa:1…
hsa05010	Alzheimer disease	91	1431	377	7681	0.00373232	0.0329536	0.241379	ENSG00000185950(IRS2)|ENSG00000165168(CYBB)|ENSG00000148482(SLC39A12)|ENSG00000154723(ATP5PF)|ENSG00000171105(INSR)|ENSG00000005022(SLC25A5)|ENSG00000124172(ATP5F1E)|ENSG00000176014(TUBB6)|ENSG00000148572(NRBF2)|ENSG00000015475(BID)|ENSG00000213341(CHUK)|ENSG00000110717(NDUFS8)|ENSG00000138613(APH1B)|ENSG00000172115(CYCS)|ENSG00000233954(UQCRHL)|ENSG00000277791(PSMB3)|ENSG00000162337(LRP5)|ENSG00…	hsa:8660|hsa:1536|hsa:221074|hsa:522|hsa:3643|hsa:292|hsa:514|hsa:84617|hsa:29982|hsa:637|hsa:1147|hsa:4728|hsa:83464|hsa:54205|hsa:440567|hsa:5691|hsa:4041|hsa:5695|hsa:1349|hsa:9377|hsa:29796|hsa:5690|hsa:7388|hsa:5693|hsa:57142|hsa:1350|hsa:5685|hsa:1340|hsa:1346|hsa:7979|hsa:9167|hsa:4724|hsa:8322|hsa:201266|hsa:7416|hsa:4035|hsa:6392|hsa:1329|hsa:4702|hsa:1020|hsa:1351|hsa:4708|hsa:55630|hsa…	http://www.kegg.jp/kegg-bin/show_pathway?hsa05010+hsa:8660+hsa:1536+hsa:221074+hsa:522+hsa:3643+hsa:292+hsa:514+hsa:84617+hsa:29982+hsa:637+hsa:1147+hsa:4728+hsa:83464+hsa:54205+hsa:440567+hsa:5691+hsa:4041+hsa:5695+hsa:1349+hsa:9377+hsa:29796+hsa:5690+hsa:7388+hsa:5693+hsa:57142+hsa:1350+hsa:5685+hsa:1340+hsa:1346+hsa:7979+hsa:9167+hsa:4724+hsa:8322+hsa:201266+hsa:7416+hsa:4035+hsa:6392+hsa:1329…
hsa00531	Glycosaminoglycan degradation	9	1431	19	7681	0.00401958	0.0330702	0.473684	ENSG00000170266(GLB1)|ENSG00000068001(HYAL2)|ENSG00000049860(HEXB)|ENSG00000113273(ARSB)|ENSG00000141012(GALNS)|ENSG00000213614(HEXA)|ENSG00000135677(GNS)|ENSG00000108784(NAGLU)|ENSG00000186792(HYAL3)	hsa:2720|hsa:8692|hsa:3074|hsa:411|hsa:2588|hsa:3073|hsa:2799|hsa:4669|hsa:8372	http://www.kegg.jp/kegg-bin/show_pathway?hsa00531+hsa:2720+hsa:8692+hsa:3074+hsa:411+hsa:2588+hsa:3073+hsa:2799+hsa:4669+hsa:8372
hsa00541	Biosynthesis of various nucleotide sugars	9	1431	19	7681	0.00401958	0.0330702	0.473684	ENSG00000170191(NANP)|ENSG00000095380(NANS)|ENSG00000065615(CYB5R4)|ENSG00000197355(UAP1L1)|ENSG00000111726(CMAS)|ENSG00000159348(CYB5R1)|ENSG00000109814(UGDH)|ENSG00000144591(GMPPA)|ENSG00000135838(NPL)	hsa:140838|hsa:54187|hsa:51167|hsa:91373|hsa:55907|hsa:51706|hsa:7358|hsa:29926|hsa:80896	http://www.kegg.jp/kegg-bin/show_pathway?hsa00541+hsa:140838+hsa:54187+hsa:51167+hsa:91373+hsa:55907+hsa:51706+hsa:7358+hsa:29926+hsa:80896
hsa05332	Graft-versus-host disease	15	1431	40	7681	0.00389733	0.0330702	0.375	ENSG00000206503(HLA-A)|ENSG00000114013(CD86)|ENSG00000111537(IFNG)|ENSG00000204642(HLA-F)|ENSG00000242574(HLA-DMB)|ENSG00000204257(HLA-DMA)|ENSG00000237541(HLA-DQA2)|ENSG00000237541(HLA-DQA2)|ENSG00000232629(HLA-DQB2)|ENSG00000115008(IL1A)|ENSG00000204287(HLA-DRA)|ENSG00000204632(HLA-G)|ENSG00000204252(HLA-DOA)|ENSG00000231389(HLA-DPA1)|ENSG00000223865(HLA-DPB1)	hsa:3105|hsa:942|hsa:3458|hsa:3134|hsa:3109|hsa:3108|hsa:3117|hsa:3118|hsa:3120|hsa:3552|hsa:3122|hsa:3135|hsa:3111|hsa:3113|hsa:3115	http://www.kegg.jp/kegg-bin/show_pathway?hsa05332+hsa:3105+hsa:942+hsa:3458+hsa:3134+hsa:3109+hsa:3108+hsa:3117+hsa:3118+hsa:3120+hsa:3552+hsa:3122+hsa:3135+hsa:3111+hsa:3113+hsa:3115
hsa00051	Fructose and mannose metabolism	13	1431	33	7681	0.00431066	0.0341801	0.393939	ENSG00000136872(ALDOB)|ENSG00000159399(HK2)|ENSG00000085662(AKR1B1)|ENSG00000198074(AKR1B10)|ENSG00000160883(HK3)|ENSG00000149925(ALDOA)|ENSG00000111669(TPI1)|ENSG00000165140(FBP1)|ENSG00000123836(PFKFB2)|ENSG00000140263(SORD)|ENSG00000114268(PFKFB4)|ENSG00000144591(GMPPA)|ENSG00000254685(FPGT)	hsa:229|hsa:3099|hsa:231|hsa:57016|hsa:3101|hsa:226|hsa:7167|hsa:2203|hsa:5208|hsa:6652|hsa:5210|hsa:29926|hsa:8790	http://www.kegg.jp/kegg-bin/show_pathway?hsa00051+hsa:229+hsa:3099+hsa:231+hsa:57016+hsa:3101+hsa:226+hsa:7167+hsa:2203+hsa:5208+hsa:6652+hsa:5210+hsa:29926+hsa:8790
hsa00270	Cysteine and methionine metabolism	18	1431	52	7681	0.00449718	0.0341801	0.346154	ENSG00000179630(LACC1)|ENSG00000274276(CBSL)|ENSG00000160200(CBS)|ENSG00000060982(BCAT1)|ENSG00000135069(PSAT1)|ENSG00000120053(GOT1)|ENSG00000182551(ADI1)|ENSG00000171989(LDHAL6B)|ENSG00000128309(MPST)|ENSG00000001084(GCLC)|ENSG00000168710(AHCYL1)|ENSG00000023909(GCLM)|ENSG00000104951(IL4I1)|ENSG00000102172(SMS)|ENSG00000135094(SDS)|ENSG00000139410(SDSL)|ENSG00000014641(MDH1)|ENSG00000149089(API…	hsa:144811|hsa:102724560|hsa:875|hsa:586|hsa:29968|hsa:2805|hsa:55256|hsa:92483|hsa:4357|hsa:2729|hsa:10768|hsa:2730|hsa:259307|hsa:6611|hsa:10993|hsa:113675|hsa:4190|hsa:51074	http://www.kegg.jp/kegg-bin/show_pathway?hsa00270+hsa:144811+hsa:102724560+hsa:875+hsa:586+hsa:29968+hsa:2805+hsa:55256+hsa:92483+hsa:4357+hsa:2729+hsa:10768+hsa:2730+hsa:259307+hsa:6611+hsa:10993+hsa:113675+hsa:4190+hsa:51074
hsa00360	Phenylalanine metabolism	8	1431	16	7681	0.00441131	0.0341801	0.5	ENSG00000120053(GOT1)|ENSG00000006534(ALDH3B1)|ENSG00000131471(AOC3)|ENSG00000131480(AOC2)|ENSG00000189221(MAOA)|ENSG00000171759(PAH)|ENSG00000104951(IL4I1)|ENSG00000108602(ALDH3A1)	hsa:2805|hsa:221|hsa:8639|hsa:314|hsa:4128|hsa:5053|hsa:259307|hsa:218	http://www.kegg.jp/kegg-bin/show_pathway?hsa00360+hsa:2805+hsa:221+hsa:8639+hsa:314+hsa:4128+hsa:5053+hsa:259307+hsa:218
hsa00561	Glycerolipid metabolism	20	1431	60	7681	0.00462659	0.0341801	0.333333	ENSG00000100344(PNPLA3)|ENSG00000141934(PLPP2)|ENSG00000132793(LPIN3)|ENSG00000162407(PLPP3)|ENSG00000138678(GPAT3)|ENSG00000111275(ALDH2)|ENSG00000198814(GK)|ENSG00000102393(GLA)|ENSG00000062282(DGAT2)|ENSG00000085662(AKR1B1)|ENSG00000198074(AKR1B10)|ENSG00000169692(AGPAT2)|ENSG00000164904(ALDH7A1)|ENSG00000058866(DGKG)|ENSG00000185000(DGAT1)|ENSG00000072210(ALDH3A2)|ENSG00000157680(DGKI)|ENSG00…	hsa:80339|hsa:8612|hsa:64900|hsa:8613|hsa:84803|hsa:217|hsa:2710|hsa:2717|hsa:84649|hsa:231|hsa:57016|hsa:10555|hsa:501|hsa:1608|hsa:8694|hsa:224|hsa:9162|hsa:11343|hsa:116255|hsa:10327	http://www.kegg.jp/kegg-bin/show_pathway?hsa00561+hsa:80339+hsa:8612+hsa:64900+hsa:8613+hsa:84803+hsa:217+hsa:2710+hsa:2717+hsa:84649+hsa:231+hsa:57016+hsa:10555+hsa:501+hsa:1608+hsa:8694+hsa:224+hsa:9162+hsa:11343+hsa:116255+hsa:10327
hsa01230	Biosynthesis of amino acids	23	1431	72	7681	0.00455661	0.0341801	0.319444	ENSG00000274276(CBSL)|ENSG00000160200(CBS)|ENSG00000060982(BCAT1)|ENSG00000135069(PSAT1)|ENSG00000146733(PSPH)|ENSG00000120053(GOT1)|ENSG00000173599(PC)|ENSG00000101911(PRPS2)|ENSG00000136872(ALDOB)|ENSG00000171759(PAH)|ENSG00000177156(TALDO1)|ENSG00000149925(ALDOA)|ENSG00000151005(TKTL2)|ENSG00000122729(ACO1)|ENSG00000111669(TPI1)|ENSG00000197713(RPE)|ENSG00000067225(PKM)|ENSG00000135821(GLUL)|E…	hsa:102724560|hsa:875|hsa:586|hsa:29968|hsa:5723|hsa:2805|hsa:5091|hsa:5634|hsa:229|hsa:5053|hsa:6888|hsa:226|hsa:84076|hsa:48|hsa:7167|hsa:6120|hsa:5315|hsa:2752|hsa:10993|hsa:113675|hsa:162417|hsa:3417|hsa:7086	http://www.kegg.jp/kegg-bin/show_pathway?hsa01230+hsa:102724560+hsa:875+hsa:586+hsa:29968+hsa:5723+hsa:2805+hsa:5091+hsa:5634+hsa:229+hsa:5053+hsa:6888+hsa:226+hsa:84076+hsa:48+hsa:7167+hsa:6120+hsa:5315+hsa:2752+hsa:10993+hsa:113675+hsa:162417+hsa:3417+hsa:7086
hsa01250	Biosynthesis of nucleotide sugars	14	1431	37	7681	0.00476004	0.0344627	0.378378	ENSG00000170191(NANP)|ENSG00000095380(NANS)|ENSG00000013375(PGM3)|ENSG00000156958(GALK2)|ENSG00000159399(HK2)|ENSG00000197355(UAP1L1)|ENSG00000111726(CMAS)|ENSG00000160883(HK3)|ENSG00000109814(UGDH)|ENSG00000117308(GALE)|ENSG00000108479(GALK1)|ENSG00000198380(GFPT1)|ENSG00000144591(GMPPA)|ENSG00000254685(FPGT)	hsa:140838|hsa:54187|hsa:5238|hsa:2585|hsa:3099|hsa:91373|hsa:55907|hsa:3101|hsa:7358|hsa:2582|hsa:2584|hsa:2673|hsa:29926|hsa:8790	http://www.kegg.jp/kegg-bin/show_pathway?hsa01250+hsa:140838+hsa:54187+hsa:5238+hsa:2585+hsa:3099+hsa:91373+hsa:55907+hsa:3101+hsa:7358+hsa:2582+hsa:2584+hsa:2673+hsa:29926+hsa:8790
hsa00071	Fatty acid degradation	15	1431	41	7681	0.00510743	0.0362527	0.365854	ENSG00000167315(ACAA2)|ENSG00000167969(ECI1)|ENSG00000138029(HADHB)|ENSG00000111275(ALDH2)|ENSG00000068366(ACSL4)|ENSG00000120437(ACAT2)|ENSG00000164904(ALDH7A1)|ENSG00000113790(EHHADH)|ENSG00000110090(CPT1A)|ENSG00000072210(ALDH3A2)|ENSG00000127884(ECHS1)|ENSG00000197142(ACSL5)|ENSG00000161533(ACOX1)|ENSG00000138796(HADH)|ENSG00000072778(ACADVL)	hsa:10449|hsa:1632|hsa:3032|hsa:217|hsa:2182|hsa:39|hsa:501|hsa:1962|hsa:1374|hsa:224|hsa:1892|hsa:51703|hsa:51|hsa:3033|hsa:37	http://www.kegg.jp/kegg-bin/show_pathway?hsa00071+hsa:10449+hsa:1632+hsa:3032+hsa:217+hsa:2182+hsa:39+hsa:501+hsa:1962+hsa:1374+hsa:224+hsa:1892+hsa:51703+hsa:51+hsa:3033+hsa:37
hsa00260	Glycine, serine and threonine metabolism	14	1431	38	7681	0.00626962	0.0428227	0.368421	ENSG00000274276(CBSL)|ENSG00000160200(CBS)|ENSG00000135069(PSAT1)|ENSG00000146733(PSPH)|ENSG00000131471(AOC3)|ENSG00000131480(AOC2)|ENSG00000189221(MAOA)|ENSG00000164904(ALDH7A1)|ENSG00000171766(GATM)|ENSG00000023330(ALAS1)|ENSG00000167720(SRR)|ENSG00000135094(SDS)|ENSG00000139410(SDSL)|ENSG00000016391(CHDH)	hsa:102724560|hsa:875|hsa:29968|hsa:5723|hsa:8639|hsa:314|hsa:4128|hsa:501|hsa:2628|hsa:211|hsa:63826|hsa:10993|hsa:113675|hsa:55349	http://www.kegg.jp/kegg-bin/show_pathway?hsa00260+hsa:102724560+hsa:875+hsa:29968+hsa:5723+hsa:8639+hsa:314+hsa:4128+hsa:501+hsa:2628+hsa:211+hsa:63826+hsa:10993+hsa:113675+hsa:55349
hsa04260	Cardiac muscle contraction	25	1431	82	7681	0.00626128	0.0428227	0.304878	ENSG00000233954(UQCRHL)|ENSG00000090020(SLC9A1)|ENSG00000198363(ASPH)|ENSG00000131174(COX7B)|ENSG00000178741(COX5A)|ENSG00000184076(UQCR10)|ENSG00000137731(FXYD2)|ENSG00000173660(UQCRH)|ENSG00000092054(MYH7)|ENSG00000127184(COX7C)|ENSG00000126267(COX6B1)|ENSG00000153956(CACNA2D1)|ENSG00000161281(COX7A1)|ENSG00000115944(COX7A2L)|ENSG00000183023(SLC8A1)|ENSG00000069849(ATP1B3)|ENSG00000197616(MYH6)…	hsa:440567|hsa:6548|hsa:444|hsa:1349|hsa:9377|hsa:29796|hsa:486|hsa:7388|hsa:4625|hsa:1350|hsa:1340|hsa:781|hsa:1346|hsa:9167|hsa:6546|hsa:483|hsa:4624|hsa:1329|hsa:1351|hsa:482|hsa:481|hsa:7139|hsa:1347|hsa:7384|hsa:776	http://www.kegg.jp/kegg-bin/show_pathway?hsa04260+hsa:440567+hsa:6548+hsa:444+hsa:1349+hsa:9377+hsa:29796+hsa:486+hsa:7388+hsa:4625+hsa:1350+hsa:1340+hsa:781+hsa:1346+hsa:9167+hsa:6546+hsa:483+hsa:4624+hsa:1329+hsa:1351+hsa:482+hsa:481+hsa:7139+hsa:1347+hsa:7384+hsa:776
hsa04610	Complement and coagulation cascades	24	1431	78	7681	0.0064459	0.0432114	0.307692	ENSG00000178726(THBD)|ENSG00000155659(VSIG4)|ENSG00000197766(CFD)|ENSG00000171860(C3AR1)|ENSG00000085063(CD59)|ENSG00000101000(PROCR)|ENSG00000011422(PLAUR)|ENSG00000197405(C5AR1)|ENSG00000125730(C3)|ENSG00000169896(ITGAM)|ENSG00000197249(SERPINA1)|ENSG00000182326(C1S)|ENSG00000159403(C1R)|ENSG00000104368(PLAT)|ENSG00000000971(CFH)|ENSG00000167711(SERPINF2)|ENSG00000149131(SERPING1)|ENSG000001662…	hsa:7056|hsa:11326|hsa:1675|hsa:719|hsa:966|hsa:10544|hsa:5329|hsa:728|hsa:718|hsa:3684|hsa:5265|hsa:716|hsa:715|hsa:5327|hsa:3075|hsa:5345|hsa:710|hsa:717|hsa:1379|hsa:712|hsa:714|hsa:713|hsa:5624|hsa:3078	http://www.kegg.jp/kegg-bin/show_pathway?hsa04610+hsa:7056+hsa:11326+hsa:1675+hsa:719+hsa:966+hsa:10544+hsa:5329+hsa:728+hsa:718+hsa:3684+hsa:5265+hsa:716+hsa:715+hsa:5327+hsa:3075+hsa:5345+hsa:710+hsa:717+hsa:1379+hsa:712+hsa:714+hsa:713+hsa:5624+hsa:3078
hsa00030	Pentose phosphate pathway	12	1431	31	7681	0.00708618	0.0450035	0.387097	ENSG00000023697(DERA)|ENSG00000160211(G6PD)|ENSG00000101911(PRPS2)|ENSG00000136872(ALDOB)|ENSG00000177156(TALDO1)|ENSG00000149925(ALDOA)|ENSG00000151005(TKTL2)|ENSG00000165140(FBP1)|ENSG00000197713(RPE)|ENSG00000142657(PGD)|ENSG00000049239(H6PD)|ENSG00000163931(TKT)	hsa:51071|hsa:2539|hsa:5634|hsa:229|hsa:6888|hsa:226|hsa:84076|hsa:2203|hsa:6120|hsa:5226|hsa:9563|hsa:7086	http://www.kegg.jp/kegg-bin/show_pathway?hsa00030+hsa:51071+hsa:2539+hsa:5634+hsa:229+hsa:6888+hsa:226+hsa:84076+hsa:2203+hsa:6120+hsa:5226+hsa:9563+hsa:7086
hsa00120	Primary bile acid biosynthesis	8	1431	17	7681	0.00698787	0.0450035	0.470588	ENSG00000198610(AKR1C4)|ENSG00000101473(ACOT8)|ENSG00000172817(CYP7B1)|ENSG00000146233(CYP39A1)|ENSG00000167910(CYP7A1)|ENSG00000099377(HSD3B7)|ENSG00000133835(HSD17B4)|ENSG00000135929(CYP27A1)	hsa:1109|hsa:10005|hsa:9420|hsa:51302|hsa:1581|hsa:80270|hsa:3295|hsa:1593	http://www.kegg.jp/kegg-bin/show_pathway?hsa00120+hsa:1109+hsa:10005+hsa:9420+hsa:51302+hsa:1581+hsa:80270+hsa:3295+hsa:1593
hsa00410	beta-Alanine metabolism	12	1431	31	7681	0.00708618	0.0450035	0.387097	ENSG00000006534(ALDH3B1)|ENSG00000131471(AOC3)|ENSG00000131480(AOC2)|ENSG00000111275(ALDH2)|ENSG00000164904(ALDH7A1)|ENSG00000113790(EHHADH)|ENSG00000072210(ALDH3A2)|ENSG00000108602(ALDH3A1)|ENSG00000127884(ECHS1)|ENSG00000147647(DPYS)|ENSG00000128683(GAD1)|ENSG00000161533(ACOX1)	hsa:221|hsa:8639|hsa:314|hsa:217|hsa:501|hsa:1962|hsa:224|hsa:218|hsa:1892|hsa:1807|hsa:2571|hsa:51	http://www.kegg.jp/kegg-bin/show_pathway?hsa00410+hsa:221+hsa:8639+hsa:314+hsa:217+hsa:501+hsa:1962+hsa:224+hsa:218+hsa:1892+hsa:1807+hsa:2571+hsa:51
hsa04640	Hematopoietic cell lineage	28	1431	96	7681	0.00773779	0.0482945	0.291667	ENSG00000185291(IL3RA)|ENSG00000122025(FLT3)|ENSG00000085063(CD59)|ENSG00000124334(IL9R)|ENSG00000104432(IL7)|ENSG00000164400(CSF2)|ENSG00000105383(CD33)|ENSG00000198223(CSF2RA)|ENSG00000164399(IL3)|ENSG00000169896(ITGAM)|ENSG00000184371(CSF1)|ENSG00000158473(CD1D)|ENSG00000242574(HLA-DMB)|ENSG00000204257(HLA-DMA)|ENSG00000170458(CD14)|ENSG00000104921(FCER2)|ENSG00000237541(HLA-DQA2)|ENSG00000237…	hsa:3563|hsa:2322|hsa:966|hsa:3581|hsa:3574|hsa:1437|hsa:945|hsa:1438|hsa:3562|hsa:3684|hsa:1435|hsa:912|hsa:3109|hsa:3108|hsa:929|hsa:2208|hsa:3117|hsa:3118|hsa:3120|hsa:3552|hsa:928|hsa:3122|hsa:7037|hsa:3111|hsa:3113|hsa:3115|hsa:1379|hsa:2209	http://www.kegg.jp/kegg-bin/show_pathway?hsa04640+hsa:3563+hsa:2322+hsa:966+hsa:3581+hsa:3574+hsa:1437+hsa:945+hsa:1438+hsa:3562+hsa:3684+hsa:1435+hsa:912+hsa:3109+hsa:3108+hsa:929+hsa:2208+hsa:3117+hsa:3118+hsa:3120+hsa:3552+hsa:928+hsa:3122+hsa:7037+hsa:3111+hsa:3113+hsa:3115+hsa:1379+hsa:2209
hsa00010	Glycolysis / Gluconeogenesis	20	1431	63	7681	0.00848034	0.0514825	0.31746	ENSG00000131069(ACSS2)|ENSG00000131828(PDHA1)|ENSG00000107789(MINPP1)|ENSG00000006534(ALDH3B1)|ENSG00000171989(LDHAL6B)|ENSG00000111275(ALDH2)|ENSG00000136872(ALDOB)|ENSG00000159399(HK2)|ENSG00000100889(PCK2)|ENSG00000160883(HK3)|ENSG00000164904(ALDH7A1)|ENSG00000149925(ALDOA)|ENSG00000072210(ALDH3A2)|ENSG00000108602(ALDH3A1)|ENSG00000111669(TPI1)|ENSG00000165140(FBP1)|ENSG00000067225(PKM)|ENSG00…	hsa:55902|hsa:5160|hsa:9562|hsa:221|hsa:92483|hsa:217|hsa:229|hsa:3099|hsa:5106|hsa:3101|hsa:501|hsa:226|hsa:224|hsa:218|hsa:7167|hsa:2203|hsa:5315|hsa:1737|hsa:92579|hsa:10327	http://www.kegg.jp/kegg-bin/show_pathway?hsa00010+hsa:55902+hsa:5160+hsa:9562+hsa:221+hsa:92483+hsa:217+hsa:229+hsa:3099+hsa:5106+hsa:3101+hsa:501+hsa:226+hsa:224+hsa:218+hsa:7167+hsa:2203+hsa:5315+hsa:1737+hsa:92579+hsa:10327
hsa00062	Fatty acid elongation	11	1431	28	7681	0.00863025	0.0514825	0.392857	ENSG00000167315(ACAA2)|ENSG00000184227(ACOT1)|ENSG00000074696(HACD3)|ENSG00000138029(HADHB)|ENSG00000149084(HSD17B12)|ENSG00000119915(ELOVL3)|ENSG00000177465(ACOT4)|ENSG00000127884(ECHS1)|ENSG00000138796(HADH)|ENSG00000131238(PPT1)|ENSG00000097021(ACOT7)	hsa:10449|hsa:641371|hsa:51495|hsa:3032|hsa:51144|hsa:83401|hsa:122970|hsa:1892|hsa:3033|hsa:5538|hsa:11332	http://www.kegg.jp/kegg-bin/show_pathway?hsa00062+hsa:10449+hsa:641371+hsa:51495+hsa:3032+hsa:51144+hsa:83401+hsa:122970+hsa:1892+hsa:3033+hsa:5538+hsa:11332
hsa05134	Legionellosis	18	1431	55	7681	0.00867522	0.0514825	0.327273	ENSG00000172115(CYCS)|ENSG00000163739(CXCL1)|ENSG00000136869(TLR4)|ENSG00000109971(HSPA8)|ENSG00000169429(CXCL8)|ENSG00000103490(PYCARD)|ENSG00000125730(C3)|ENSG00000265808(SEC22B)|ENSG00000138069(RAB1A)|ENSG00000169896(ITGAM)|ENSG00000204389(HSPA1A)|ENSG00000204388(HSPA1B)|ENSG00000170458(CD14)|ENSG00000152700(SAR1B)|ENSG00000197721(CR1L)|ENSG00000137752(CASP1)|ENSG00000091106(NLRC4)|ENSG0000017…	hsa:54205|hsa:2919|hsa:7099|hsa:3312|hsa:3576|hsa:29108|hsa:718|hsa:9554|hsa:5861|hsa:3684|hsa:3303|hsa:3304|hsa:929|hsa:51128|hsa:1379|hsa:834|hsa:58484|hsa:3310	http://www.kegg.jp/kegg-bin/show_pathway?hsa05134+hsa:54205+hsa:2919+hsa:7099+hsa:3312+hsa:3576+hsa:29108+hsa:718+hsa:9554+hsa:5861+hsa:3684+hsa:3303+hsa:3304+hsa:929+hsa:51128+hsa:1379+hsa:834+hsa:58484+hsa:3310
hsa04060	Cytokine-cytokine receptor interaction	67	1431	275	7681	0.00953596	0.0556777	0.243636	ENSG00000099985(OSM)|ENSG00000128342(LIF)|ENSG00000185291(IL3RA)|ENSG00000100368(CSF2RB)|ENSG00000134470(IL15RA)|ENSG00000131080(EDA2R)|ENSG00000105246(EBI3)|ENSG00000102524(TNFSF13B)|ENSG00000172458(IL17D)|ENSG00000131724(IL13RA1)|ENSG00000108688(CCL7)|ENSG00000275385(CCL18)|ENSG00000275718(CCL15)|ENSG00000124334(IL9R)|ENSG00000108691(CCL2)|ENSG00000185436(IFNLR1)|ENSG00000173530(TNFRSF10D)|ENSG…	hsa:5008|hsa:3976|hsa:3563|hsa:1439|hsa:3601|hsa:60401|hsa:10148|hsa:10673|hsa:53342|hsa:3597|hsa:6354|hsa:6362|hsa:6359|hsa:3581|hsa:6347|hsa:163702|hsa:8793|hsa:6361|hsa:6367|hsa:3574|hsa:6355|hsa:6374|hsa:85480|hsa:2919|hsa:1437|hsa:3576|hsa:958|hsa:6372|hsa:3578|hsa:1438|hsa:246778|hsa:51330|hsa:27177|hsa:3562|hsa:3458|hsa:8744|hsa:8740|hsa:3600|hsa:26525|hsa:8794|hsa:3579|hsa:6363|hsa:1489|h…	http://www.kegg.jp/kegg-bin/show_pathway?hsa04060+hsa:5008+hsa:3976+hsa:3563+hsa:1439+hsa:3601+hsa:60401+hsa:10148+hsa:10673+hsa:53342+hsa:3597+hsa:6354+hsa:6362+hsa:6359+hsa:3581+hsa:6347+hsa:163702+hsa:8793+hsa:6361+hsa:6367+hsa:3574+hsa:6355+hsa:6374+hsa:85480+hsa:2919+hsa:1437+hsa:3576+hsa:958+hsa:6372+hsa:3578+hsa:1438+hsa:246778+hsa:51330+hsa:27177+hsa:3562+hsa:3458+hsa:8744+hsa:8740+hsa:36…
hsa05145	Toxoplasmosis	31	1431	111	7681	0.0103172	0.059283	0.279279	ENSG00000101680(LAMA1)|ENSG00000012779(ALOX5)|ENSG00000053747(LAMA3)|ENSG00000213341(CHUK)|ENSG00000172115(CYCS)|ENSG00000154589(LY96)|ENSG00000136869(TLR4)|ENSG00000109971(HSPA8)|ENSG00000101017(CD40)|ENSG00000096968(JAK2)|ENSG00000111537(IFNG)|ENSG00000135862(LAMC1)|ENSG00000242574(HLA-DMB)|ENSG00000204257(HLA-DMA)|ENSG00000108179(PPIF)|ENSG00000204389(HSPA1A)|ENSG00000204388(HSPA1B)|ENSG000002…	hsa:284217|hsa:240|hsa:3909|hsa:1147|hsa:54205|hsa:23643|hsa:7099|hsa:3312|hsa:958|hsa:3717|hsa:3458|hsa:3915|hsa:3109|hsa:3108|hsa:10105|hsa:3303|hsa:3304|hsa:3117|hsa:3118|hsa:3120|hsa:146850|hsa:4261|hsa:3122|hsa:3913|hsa:3111|hsa:3113|hsa:3115|hsa:6772|hsa:1234|hsa:3310|hsa:3586	http://www.kegg.jp/kegg-bin/show_pathway?hsa05145+hsa:284217+hsa:240+hsa:3909+hsa:1147+hsa:54205+hsa:23643+hsa:7099+hsa:3312+hsa:958+hsa:3717+hsa:3458+hsa:3915+hsa:3109+hsa:3108+hsa:10105+hsa:3303+hsa:3304+hsa:3117+hsa:3118+hsa:3120+hsa:146850+hsa:4261+hsa:3122+hsa:3913+hsa:3111+hsa:3113+hsa:3115+hsa:6772+hsa:1234+hsa:3310+hsa:3586
hsa00750	Vitamin B6 metabolism	4	1431	6	7681	0.0130677	0.0727773	0.666667	ENSG00000160209(PDXK)|ENSG00000135069(PSAT1)|ENSG00000138356(AOX1)|ENSG00000108439(PNPO)	hsa:8566|hsa:29968|hsa:316|hsa:55163	http://www.kegg.jp/kegg-bin/show_pathway?hsa00750+hsa:8566+hsa:29968+hsa:316+hsa:55163
hsa01212	Fatty acid metabolism	18	1431	57	7681	0.0128804	0.0727773	0.315789	ENSG00000167315(ACAA2)|ENSG00000099194(SCD)|ENSG00000074696(HACD3)|ENSG00000138029(HADHB)|ENSG00000149084(HSD17B12)|ENSG00000068366(ACSL4)|ENSG00000120437(ACAT2)|ENSG00000113790(EHHADH)|ENSG00000119915(ELOVL3)|ENSG00000149485(FADS1)|ENSG00000110090(CPT1A)|ENSG00000127884(ECHS1)|ENSG00000197142(ACSL5)|ENSG00000161533(ACOX1)|ENSG00000138796(HADH)|ENSG00000133835(HSD17B4)|ENSG00000131238(PPT1)|ENSG0…	hsa:10449|hsa:6319|hsa:51495|hsa:3032|hsa:51144|hsa:2182|hsa:39|hsa:1962|hsa:83401|hsa:3992|hsa:1374|hsa:1892|hsa:51703|hsa:51|hsa:3033|hsa:3295|hsa:5538|hsa:37	http://www.kegg.jp/kegg-bin/show_pathway?hsa01212+hsa:10449+hsa:6319+hsa:51495+hsa:3032+hsa:51144+hsa:2182+hsa:39+hsa:1962+hsa:83401+hsa:3992+hsa:1374+hsa:1892+hsa:51703+hsa:51+hsa:3033+hsa:3295+hsa:5538+hsa:37
hsa05320	Autoimmune thyroid disease	15	1431	45	7681	0.0132829	0.0728547	0.333333	ENSG00000206503(HLA-A)|ENSG00000101017(CD40)|ENSG00000114013(CD86)|ENSG00000204642(HLA-F)|ENSG00000242574(HLA-DMB)|ENSG00000204257(HLA-DMA)|ENSG00000237541(HLA-DQA2)|ENSG00000237541(HLA-DQA2)|ENSG00000232629(HLA-DQB2)|ENSG00000204287(HLA-DRA)|ENSG00000204632(HLA-G)|ENSG00000204252(HLA-DOA)|ENSG00000231389(HLA-DPA1)|ENSG00000223865(HLA-DPB1)|ENSG00000136634(IL10)	hsa:3105|hsa:958|hsa:942|hsa:3134|hsa:3109|hsa:3108|hsa:3117|hsa:3118|hsa:3120|hsa:3122|hsa:3135|hsa:3111|hsa:3113|hsa:3115|hsa:3586	http://www.kegg.jp/kegg-bin/show_pathway?hsa05320+hsa:3105+hsa:958+hsa:942+hsa:3134+hsa:3109+hsa:3108+hsa:3117+hsa:3118+hsa:3120+hsa:3122+hsa:3135+hsa:3111+hsa:3113+hsa:3115+hsa:3586
hsa04514	Cell adhesion molecules	39	1431	149	7681	0.0136508	0.0737548	0.261745	ENSG00000165246(NLGN4Y)|ENSG00000160223(ICOSLG)|ENSG00000197646(PDCD1LG2)|ENSG00000120217(CD274)|ENSG00000253958(CLDN23)|ENSG00000105855(ITGB8)|ENSG00000206503(HLA-A)|ENSG00000124145(SDC4)|ENSG00000179542(SLITRK4)|ENSG00000162512(SDC3)|ENSG00000073008(PVR)|ENSG00000088827(SIGLEC1)|ENSG00000101017(CD40)|ENSG00000110400(NECTIN1)|ENSG00000114013(CD86)|ENSG00000142949(PTPRF)|ENSG00000169439(SDC2)|ENS…	hsa:22829|hsa:23308|hsa:80380|hsa:29126|hsa:137075|hsa:3696|hsa:3105|hsa:6385|hsa:139065|hsa:9672|hsa:5817|hsa:6614|hsa:958|hsa:5818|hsa:942|hsa:5792|hsa:6383|hsa:6693|hsa:3134|hsa:3684|hsa:3685|hsa:3109|hsa:9069|hsa:3108|hsa:80381|hsa:965|hsa:3117|hsa:3118|hsa:3120|hsa:3122|hsa:8174|hsa:3135|hsa:3111|hsa:3113|hsa:3115|hsa:5819|hsa:6382|hsa:1366|hsa:50848	http://www.kegg.jp/kegg-bin/show_pathway?hsa04514+hsa:22829+hsa:23308+hsa:80380+hsa:29126+hsa:137075+hsa:3696+hsa:3105+hsa:6385+hsa:139065+hsa:9672+hsa:5817+hsa:6614+hsa:958+hsa:5818+hsa:942+hsa:5792+hsa:6383+hsa:6693+hsa:3134+hsa:3684+hsa:3685+hsa:3109+hsa:9069+hsa:3108+hsa:80381+hsa:965+hsa:3117+hsa:3118+hsa:3120+hsa:3122+hsa:8174+hsa:3135+hsa:3111+hsa:3113+hsa:3115+hsa:5819+hsa:6382+hsa:1366+h…
hsa03050	Proteasome	15	1431	46	7681	0.0164042	0.0873283	0.326087	ENSG00000132963(POMP)|ENSG00000125818(PSMF1)|ENSG00000277791(PSMB3)|ENSG00000136930(PSMB7)|ENSG00000126067(PSMB2)|ENSG00000100804(PSMB5)|ENSG00000041357(PSMA4)|ENSG00000127922(SEM1)|ENSG00000205220(PSMB10)|ENSG00000100911(PSME2)|ENSG00000111537(IFNG)|ENSG00000115233(PSMD14)|ENSG00000240065(PSMB9)|ENSG00000099341(PSMD8)|ENSG00000142507(PSMB6)	hsa:51371|hsa:9491|hsa:5691|hsa:5695|hsa:5690|hsa:5693|hsa:5685|hsa:7979|hsa:5699|hsa:5721|hsa:3458|hsa:10213|hsa:5698|hsa:5714|hsa:5694	http://www.kegg.jp/kegg-bin/show_pathway?hsa03050+hsa:51371+hsa:9491+hsa:5691+hsa:5695+hsa:5690+hsa:5693+hsa:5685+hsa:7979+hsa:5699+hsa:5721+hsa:3458+hsa:10213+hsa:5698+hsa:5714+hsa:5694
hsa04061	Viral protein interaction with cytokine and cytokine receptor	27	1431	97	7681	0.016666	0.0874364	0.278351	ENSG00000108688(CCL7)|ENSG00000275385(CCL18)|ENSG00000275718(CCL15)|ENSG00000108691(CCL2)|ENSG00000173530(TNFRSF10D)|ENSG00000102970(CCL17)|ENSG00000102962(CCL22)|ENSG00000108700(CCL8)|ENSG00000163735(CXCL5)|ENSG00000163739(CXCL1)|ENSG00000169429(CXCL8)|ENSG00000124875(CXCL6)|ENSG00000125735(TNFSF14)|ENSG00000173535(TNFRSF10C)|ENSG00000180871(CXCR2)|ENSG00000172724(CCL19)|ENSG00000184371(CSF1)|EN…	hsa:6354|hsa:6362|hsa:6359|hsa:6347|hsa:8793|hsa:6361|hsa:6367|hsa:6355|hsa:6374|hsa:2919|hsa:3576|hsa:6372|hsa:8740|hsa:8794|hsa:3579|hsa:6363|hsa:1435|hsa:4055|hsa:4283|hsa:10563|hsa:1230|hsa:1234|hsa:3586|hsa:11009|hsa:29949|hsa:50604|hsa:8764	http://www.kegg.jp/kegg-bin/show_pathway?hsa04061+hsa:6354+hsa:6362+hsa:6359+hsa:6347+hsa:8793+hsa:6361+hsa:6367+hsa:6355+hsa:6374+hsa:2919+hsa:3576+hsa:6372+hsa:8740+hsa:8794+hsa:3579+hsa:6363+hsa:1435+hsa:4055+hsa:4283+hsa:10563+hsa:1230+hsa:1234+hsa:3586+hsa:11009+hsa:29949+hsa:50604+hsa:8764
hsa01040	Biosynthesis of unsaturated fatty acids	10	1431	27	7681	0.0189522	0.0966293	0.37037	ENSG00000184227(ACOT1)|ENSG00000099194(SCD)|ENSG00000074696(HACD3)|ENSG00000149084(HSD17B12)|ENSG00000119915(ELOVL3)|ENSG00000149485(FADS1)|ENSG00000177465(ACOT4)|ENSG00000161533(ACOX1)|ENSG00000133835(HSD17B4)|ENSG00000097021(ACOT7)	hsa:641371|hsa:6319|hsa:51495|hsa:51144|hsa:83401|hsa:3992|hsa:122970|hsa:51|hsa:3295|hsa:11332	http://www.kegg.jp/kegg-bin/show_pathway?hsa01040+hsa:641371+hsa:6319+hsa:51495+hsa:51144+hsa:83401+hsa:3992+hsa:122970+hsa:51+hsa:3295+hsa:11332
hsa04150	mTOR signaling pathway	39	1431	152	7681	0.0188306	0.0966293	0.256579	ENSG00000102547(CAB39L)|ENSG00000171105(INSR)|ENSG00000131100(ATP6V1E1)|ENSG00000147416(ATP6V1B2)|ENSG00000187840(EIF4EBP1)|ENSG00000213341(CHUK)|ENSG00000177058(SLC38A9)|ENSG00000162337(LRP5)|ENSG00000130766(SESN2)|ENSG00000117676(RPS6KA1)|ENSG00000132793(LPIN3)|ENSG00000116954(RRAGC)|ENSG00000025039(RRAGD)|ENSG00000174804(FZD4)|ENSG00000114573(ATP6V1A)|ENSG00000155097(ATP6V1C1)|ENSG00000109270(…	hsa:81617|hsa:3643|hsa:529|hsa:526|hsa:1978|hsa:1147|hsa:153129|hsa:4041|hsa:83667|hsa:6195|hsa:64900|hsa:64121|hsa:58528|hsa:8322|hsa:523|hsa:528|hsa:8649|hsa:6009|hsa:389541|hsa:57600|hsa:51256|hsa:107080638|hsa:51382|hsa:55004|hsa:10670|hsa:84335|hsa:8321|hsa:2535|hsa:201163|hsa:9296|hsa:7855|hsa:7474|hsa:6520|hsa:28956|hsa:6446|hsa:1856|hsa:10542|hsa:55437|hsa:8324	http://www.kegg.jp/kegg-bin/show_pathway?hsa04150+hsa:81617+hsa:3643+hsa:529+hsa:526+hsa:1978+hsa:1147+hsa:153129+hsa:4041+hsa:83667+hsa:6195+hsa:64900+hsa:64121+hsa:58528+hsa:8322+hsa:523+hsa:528+hsa:8649+hsa:6009+hsa:389541+hsa:57600+hsa:51256+hsa:107080638+hsa:51382+hsa:55004+hsa:10670+hsa:84335+hsa:8321+hsa:2535+hsa:201163+hsa:9296+hsa:7855+hsa:7474+hsa:6520+hsa:28956+hsa:6446+hsa:1856+hsa:10…
hsa00290	Valine, leucine and isoleucine biosynthesis	3	1431	4	7681	0.0222198	0.111716	0.75	ENSG00000060982(BCAT1)|ENSG00000135094(SDS)|ENSG00000139410(SDSL)	hsa:586|hsa:10993|hsa:113675	http://www.kegg.jp/kegg-bin/show_pathway?hsa00290+hsa:586+hsa:10993+hsa:113675
hsa00790	Folate biosynthesis	9	1431	24	7681	0.023476	0.116415	0.375	ENSG00000159228(CBR1)|ENSG00000166228(PCBD1)|ENSG00000124615(MOCS1)|ENSG00000151552(QDPR)|ENSG00000085662(AKR1B1)|ENSG00000198074(AKR1B10)|ENSG00000171759(PAH)|ENSG00000116096(SPR)|ENSG00000137563(GGH)	hsa:873|hsa:5092|hsa:4337|hsa:5860|hsa:231|hsa:57016|hsa:5053|hsa:6697|hsa:8836	http://www.kegg.jp/kegg-bin/show_pathway?hsa00790+hsa:873+hsa:5092+hsa:4337+hsa:5860+hsa:231+hsa:57016+hsa:5053+hsa:6697+hsa:8836
hsa00920	Sulfur metabolism	5	1431	10	7681	0.0244921	0.119812	0.5	ENSG00000128309(MPST)|ENSG00000138801(PAPSS1)|ENSG00000105755(ETHE1)|ENSG00000137767(SQOR)|ENSG00000139531(SUOX)	hsa:4357|hsa:9061|hsa:23474|hsa:58472|hsa:6821	http://www.kegg.jp/kegg-bin/show_pathway?hsa00920+hsa:4357+hsa:9061+hsa:23474+hsa:58472+hsa:6821
hsa00350	Tyrosine metabolism	11	1431	32	7681	0.0252874	0.122054	0.34375	ENSG00000093010(COMT)|ENSG00000120053(GOT1)|ENSG00000006534(ALDH3B1)|ENSG00000131471(AOC3)|ENSG00000131480(AOC2)|ENSG00000189221(MAOA)|ENSG00000104951(IL4I1)|ENSG00000138356(AOX1)|ENSG00000108602(ALDH3A1)|ENSG00000100577(GSTZ1)|ENSG00000103876(FAH)	hsa:1312|hsa:2805|hsa:221|hsa:8639|hsa:314|hsa:4128|hsa:259307|hsa:316|hsa:218|hsa:2954|hsa:2184	http://www.kegg.jp/kegg-bin/show_pathway?hsa00350+hsa:1312+hsa:2805+hsa:221+hsa:8639+hsa:314+hsa:4128+hsa:259307+hsa:316+hsa:218+hsa:2954+hsa:2184
hsa00340	Histidine metabolism	8	1431	21	7681	0.0291115	0.138663	0.380952	ENSG00000006534(ALDH3B1)|ENSG00000189221(MAOA)|ENSG00000111275(ALDH2)|ENSG00000164904(ALDH7A1)|ENSG00000150540(HNMT)|ENSG00000002726(AOC1)|ENSG00000072210(ALDH3A2)|ENSG00000108602(ALDH3A1)	hsa:221|hsa:4128|hsa:217|hsa:501|hsa:3176|hsa:26|hsa:224|hsa:218	http://www.kegg.jp/kegg-bin/show_pathway?hsa00340+hsa:221+hsa:4128+hsa:217+hsa:501+hsa:3176+hsa:26+hsa:224+hsa:218
hsa00052	Galactose metabolism	10	1431	29	7681	0.0315681	0.148411	0.344828	ENSG00000170266(GLB1)|ENSG00000102393(GLA)|ENSG00000159399(HK2)|ENSG00000085662(AKR1B1)|ENSG00000198074(AKR1B10)|ENSG00000160883(HK3)|ENSG00000171298(GAA)|ENSG00000117308(GALE)|ENSG00000141349(G6PC3)|ENSG00000108479(GALK1)	hsa:2720|hsa:2717|hsa:3099|hsa:231|hsa:57016|hsa:3101|hsa:2548|hsa:2582|hsa:92579|hsa:2584	http://www.kegg.jp/kegg-bin/show_pathway?hsa00052+hsa:2720+hsa:2717+hsa:3099+hsa:231+hsa:57016+hsa:3101+hsa:2548+hsa:2582+hsa:92579+hsa:2584
hsa04380	Osteoclast differentiation	34	1431	135	7681	0.0347582	0.159272	0.251852	ENSG00000100365(NCF4)|ENSG00000170345(FOS)|ENSG00000101307(SIRPB1)|ENSG00000213341(CHUK)|ENSG00000198053(SIRPA)|ENSG00000165025(SYK)|ENSG00000010671(BTK)|ENSG00000095970(TREM2)|ENSG00000125740(FOSB)|ENSG00000239998(LILRA2)|ENSG00000186818(LILRB4)|ENSG00000111537(IFNG)|ENSG00000161011(SQSTM1)|ENSG00000175592(FOSL1)|ENSG00000184371(CSF1)|ENSG00000102575(ACP5)|ENSG00000115008(IL1A)|ENSG00000011600(T…	hsa:4689|hsa:2353|hsa:10326|hsa:1147|hsa:140885|hsa:6850|hsa:695|hsa:54209|hsa:2354|hsa:11027|hsa:11006|hsa:3458|hsa:8878|hsa:8061|hsa:1435|hsa:54|hsa:3552|hsa:7305|hsa:653361|hsa:126014|hsa:10990|hsa:4286|hsa:6772|hsa:4688|hsa:11025|hsa:102725035|hsa:107987425|hsa:107987462|hsa:5468|hsa:2213|hsa:2212|hsa:3725|hsa:1513|hsa:2209	http://www.kegg.jp/kegg-bin/show_pathway?hsa04380+hsa:4689+hsa:2353+hsa:10326+hsa:1147+hsa:140885+hsa:6850+hsa:695+hsa:54209+hsa:2354+hsa:11027+hsa:11006+hsa:3458+hsa:8878+hsa:8061+hsa:1435+hsa:54+hsa:3552+hsa:7305+hsa:653361+hsa:126014+hsa:10990+hsa:4286+hsa:6772+hsa:4688+hsa:11025+hsa:102725035+hsa:107987425+hsa:107987462+hsa:5468+hsa:2213+hsa:2212+hsa:3725+hsa:1513+hsa:2209
hsa05133	Pertussis	21	1431	76	7681	0.0346899	0.159272	0.276316	ENSG00000170345(FOS)|ENSG00000154589(LY96)|ENSG00000163735(CXCL5)|ENSG00000136869(TLR4)|ENSG00000169429(CXCL8)|ENSG00000124875(CXCL6)|ENSG00000103490(PYCARD)|ENSG00000125730(C3)|ENSG00000169896(ITGAM)|ENSG00000182326(C1S)|ENSG00000159403(C1R)|ENSG00000170458(CD14)|ENSG00000115008(IL1A)|ENSG00000149131(SERPING1)|ENSG00000166278(C2)|ENSG00000137752(CASP1)|ENSG00000173372(C1QA)|ENSG00000159189(C1QC)…	hsa:2353|hsa:23643|hsa:6374|hsa:7099|hsa:3576|hsa:6372|hsa:29108|hsa:718|hsa:3684|hsa:716|hsa:715|hsa:929|hsa:3552|hsa:710|hsa:717|hsa:834|hsa:712|hsa:714|hsa:713|hsa:3586|hsa:3725	http://www.kegg.jp/kegg-bin/show_pathway?hsa05133+hsa:2353+hsa:23643+hsa:6374+hsa:7099+hsa:3576+hsa:6372+hsa:29108+hsa:718+hsa:3684+hsa:716+hsa:715+hsa:929+hsa:3552+hsa:710+hsa:717+hsa:834+hsa:712+hsa:714+hsa:713+hsa:3586+hsa:3725
hsa00040	Pentose and glucuronate interconversions	9	1431	26	7681	0.0395293	0.17887	0.346154	ENSG00000133116(KL)|ENSG00000093217(XYLB)|ENSG00000085662(AKR1B1)|ENSG00000198074(AKR1B10)|ENSG00000104808(DHDH)|ENSG00000109814(UGDH)|ENSG00000197713(RPE)|ENSG00000140263(SORD)|ENSG00000117448(AKR1A1)	hsa:9365|hsa:9942|hsa:231|hsa:57016|hsa:27294|hsa:7358|hsa:6120|hsa:6652|hsa:10327	http://www.kegg.jp/kegg-bin/show_pathway?hsa00040+hsa:9365+hsa:9942+hsa:231+hsa:57016+hsa:27294+hsa:7358+hsa:6120+hsa:6652+hsa:10327
hsa00603	Glycosphingolipid biosynthesis - globo and isoglobo series	6	1431	15	7681	0.0448545	0.191027	0.4	ENSG00000198951(NAGA)|ENSG00000049860(HEXB)|ENSG00000102393(GLA)|ENSG00000169255(B3GALNT1)|ENSG00000148288(GBGT1)|ENSG00000213614(HEXA)	hsa:4668|hsa:3074|hsa:2717|hsa:8706|hsa:26301|hsa:3073	http://www.kegg.jp/kegg-bin/show_pathway?hsa00603+hsa:4668+hsa:3074+hsa:2717+hsa:8706+hsa:26301+hsa:3073
hsa00740	Riboflavin metabolism	4	1431	8	7681	0.0444799	0.191027	0.5	ENSG00000134575(ACP2)|ENSG00000135002(RFK)|ENSG00000090013(BLVRB)|ENSG00000102575(ACP5)	hsa:53|hsa:55312|hsa:645|hsa:54	http://www.kegg.jp/kegg-bin/show_pathway?hsa00740+hsa:53+hsa:55312+hsa:645+hsa:54
hsa04978	Mineral absorption	17	1431	60	7681	0.0432791	0.191027	0.283333	ENSG00000167996(FTH1)|ENSG00000100292(HMOX1)|ENSG00000137731(FXYD2)|ENSG00000183023(SLC8A1)|ENSG00000169715(MT1E)|ENSG00000205362(MT1A)|ENSG00000069849(ATP1B3)|ENSG00000147804(SLC39A4)|ENSG00000087086(FTL)|ENSG00000129244(ATP1B2)|ENSG00000111424(VDR)|ENSG00000136868(SLC31A1)|ENSG00000143153(ATP1B1)|ENSG00000177556(ATOX1)|ENSG00000110911(SLC11A2)|ENSG00000170385(SLC30A1)|ENSG00000071967(CYBRD1)	hsa:2495|hsa:3162|hsa:486|hsa:6546|hsa:4493|hsa:4489|hsa:483|hsa:55630|hsa:2512|hsa:482|hsa:7421|hsa:1317|hsa:481|hsa:475|hsa:4891|hsa:7779|hsa:79901	http://www.kegg.jp/kegg-bin/show_pathway?hsa04978+hsa:2495+hsa:3162+hsa:486+hsa:6546+hsa:4493+hsa:4489+hsa:483+hsa:55630+hsa:2512+hsa:482+hsa:7421+hsa:1317+hsa:481+hsa:475+hsa:4891+hsa:7779+hsa:79901
hsa05014	Amyotrophic lateral sclerosis	79	1431	355	7681	0.0443941	0.191027	0.222535	ENSG00000121691(CAT)|ENSG00000147206(NXF3)|ENSG00000154723(ATP5PF)|ENSG00000250479(CHCHD10)|ENSG00000158486(DNAH3)|ENSG00000100246(DNAL4)|ENSG00000124172(ATP5F1E)|ENSG00000176014(TUBB6)|ENSG00000148572(NRBF2)|ENSG00000015475(BID)|ENSG00000110717(NDUFS8)|ENSG00000172115(CYCS)|ENSG00000233954(UQCRHL)|ENSG00000277791(PSMB3)|ENSG00000131966(ACTR10)|ENSG00000136930(PSMB7)|ENSG00000131174(COX7B)|ENSG00…	hsa:847|hsa:56000|hsa:522|hsa:400916|hsa:55567|hsa:10126|hsa:514|hsa:84617|hsa:29982|hsa:637|hsa:4728|hsa:54205|hsa:440567|hsa:5691|hsa:55860|hsa:5695|hsa:1349|hsa:9377|hsa:7802|hsa:29796|hsa:5690|hsa:7388|hsa:5693|hsa:1350|hsa:5685|hsa:55255|hsa:1340|hsa:1346|hsa:7979|hsa:81631|hsa:9167|hsa:4724|hsa:283|hsa:643246|hsa:7416|hsa:2878|hsa:6392|hsa:6506|hsa:1329|hsa:55916|hsa:4702|hsa:9896|hsa:5861|…	http://www.kegg.jp/kegg-bin/show_pathway?hsa05014+hsa:847+hsa:56000+hsa:522+hsa:400916+hsa:55567+hsa:10126+hsa:514+hsa:84617+hsa:29982+hsa:637+hsa:4728+hsa:54205+hsa:440567+hsa:5691+hsa:55860+hsa:5695+hsa:1349+hsa:9377+hsa:7802+hsa:29796+hsa:5690+hsa:7388+hsa:5693+hsa:1350+hsa:5685+hsa:55255+hsa:1340+hsa:1346+hsa:7979+hsa:81631+hsa:9167+hsa:4724+hsa:283+hsa:643246+hsa:7416+hsa:2878+hsa:6392+hsa:6…
hsa05022	Pathways of neurodegeneration - multiple diseases	101	1431	464	7681	0.0437922	0.191027	0.217672	ENSG00000101327(PDYN)|ENSG00000165168(CYBB)|ENSG00000121691(CAT)|ENSG00000154723(ATP5PF)|ENSG00000005022(SLC25A5)|ENSG00000158486(DNAH3)|ENSG00000100246(DNAL4)|ENSG00000124172(ATP5F1E)|ENSG00000176014(TUBB6)|ENSG00000148572(NRBF2)|ENSG00000015475(BID)|ENSG00000110717(NDUFS8)|ENSG00000172115(CYCS)|ENSG00000233954(UQCRHL)|ENSG00000277791(PSMB3)|ENSG00000162337(LRP5)|ENSG00000127946(HIP1)|ENSG000001…	hsa:5173|hsa:1536|hsa:847|hsa:522|hsa:292|hsa:55567|hsa:10126|hsa:514|hsa:84617|hsa:29982|hsa:637|hsa:4728|hsa:54205|hsa:440567|hsa:5691|hsa:4041|hsa:3092|hsa:55860|hsa:7345|hsa:5695|hsa:1349|hsa:9377|hsa:7802|hsa:29796|hsa:5690|hsa:7388|hsa:5693|hsa:1350|hsa:5685|hsa:55255|hsa:1340|hsa:1346|hsa:7979|hsa:81631|hsa:9167|hsa:4724|hsa:8322|hsa:643246|hsa:7416|hsa:6261|hsa:2878|hsa:6392|hsa:1329|hsa:…	http://www.kegg.jp/kegg-bin/show_pathway?hsa05022+hsa:5173+hsa:1536+hsa:847+hsa:522+hsa:292+hsa:55567+hsa:10126+hsa:514+hsa:84617+hsa:29982+hsa:637+hsa:4728+hsa:54205+hsa:440567+hsa:5691+hsa:4041+hsa:3092+hsa:55860+hsa:7345+hsa:5695+hsa:1349+hsa:9377+hsa:7802+hsa:29796+hsa:5690+hsa:7388+hsa:5693+hsa:1350+hsa:5685+hsa:55255+hsa:1340+hsa:1346+hsa:7979+hsa:81631+hsa:9167+hsa:4724+hsa:8322+hsa:643246…
hsa00280	Valine, leucine and isoleucine degradation	14	1431	48	7681	0.0505597	0.210375	0.291667	ENSG00000167315(ACAA2)|ENSG00000060982(BCAT1)|ENSG00000117305(HMGCL)|ENSG00000138029(HADHB)|ENSG00000106049(HIBADH)|ENSG00000111275(ALDH2)|ENSG00000104951(IL4I1)|ENSG00000120437(ACAT2)|ENSG00000164904(ALDH7A1)|ENSG00000113790(EHHADH)|ENSG00000138356(AOX1)|ENSG00000072210(ALDH3A2)|ENSG00000127884(ECHS1)|ENSG00000138796(HADH)	hsa:10449|hsa:586|hsa:3155|hsa:3032|hsa:11112|hsa:217|hsa:259307|hsa:39|hsa:501|hsa:1962|hsa:316|hsa:224|hsa:1892|hsa:3033	http://www.kegg.jp/kegg-bin/show_pathway?hsa00280+hsa:10449+hsa:586+hsa:3155+hsa:3032+hsa:11112+hsa:217+hsa:259307+hsa:39+hsa:501+hsa:1962+hsa:316+hsa:224+hsa:1892+hsa:3033
hsa00330	Arginine and proline metabolism	14	1431	48	7681	0.0505597	0.210375	0.291667	ENSG00000120053(GOT1)|ENSG00000104879(CKM)|ENSG00000189221(MAOA)|ENSG00000111275(ALDH2)|ENSG00000166165(CKB)|ENSG00000102172(SMS)|ENSG00000164904(ALDH7A1)|ENSG00000171766(GATM)|ENSG00000002726(AOC1)|ENSG00000072210(ALDH3A2)|ENSG00000141504(SAT2)|ENSG00000122884(P4HA1)|ENSG00000002549(LAP3)|ENSG00000072682(P4HA2)	hsa:2805|hsa:1158|hsa:4128|hsa:217|hsa:1152|hsa:6611|hsa:501|hsa:2628|hsa:26|hsa:224|hsa:112483|hsa:5033|hsa:51056|hsa:8974	http://www.kegg.jp/kegg-bin/show_pathway?hsa00330+hsa:2805+hsa:1158+hsa:4128+hsa:217+hsa:1152+hsa:6611+hsa:501+hsa:2628+hsa:26+hsa:224+hsa:112483+hsa:5033+hsa:51056+hsa:8974
hsa05418	Fluid shear stress and atherosclerosis	33	1431	136	7681	0.0591078	0.243148	0.242647	ENSG00000178726(THBD)|ENSG00000100348(TXN2)|ENSG00000100311(PDGFB)|ENSG00000170345(FOS)|ENSG00000124145(SDC4)|ENSG00000008394(MGST1)|ENSG00000213341(CHUK)|ENSG00000136810(TXN)|ENSG00000148834(GSTO1)|ENSG00000108691(CCL2)|ENSG00000100292(HMOX1)|ENSG00000087245(MMP2)|ENSG00000133433(GSTT2B)|ENSG00000181019(NQO1)|ENSG00000169439(SDC2)|ENSG00000111537(IFNG)|ENSG00000135047(CTSL)|ENSG00000134202(GSTM3…	hsa:7056|hsa:25828|hsa:5155|hsa:2353|hsa:6385|hsa:4257|hsa:1147|hsa:7295|hsa:9446|hsa:6347|hsa:3162|hsa:4313|hsa:653689|hsa:1728|hsa:6383|hsa:3458|hsa:1514|hsa:2947|hsa:8878|hsa:3685|hsa:4259|hsa:5327|hsa:59341|hsa:7422|hsa:3552|hsa:9817|hsa:658|hsa:4258|hsa:653361|hsa:4688|hsa:2950|hsa:6382|hsa:3725	http://www.kegg.jp/kegg-bin/show_pathway?hsa05418+hsa:7056+hsa:25828+hsa:5155+hsa:2353+hsa:6385+hsa:4257+hsa:1147+hsa:7295+hsa:9446+hsa:6347+hsa:3162+hsa:4313+hsa:653689+hsa:1728+hsa:6383+hsa:3458+hsa:1514+hsa:2947+hsa:8878+hsa:3685+hsa:4259+hsa:5327+hsa:59341+hsa:7422+hsa:3552+hsa:9817+hsa:658+hsa:4258+hsa:653361+hsa:4688+hsa:2950+hsa:6382+hsa:3725
hsa00140	Steroid hormone biosynthesis	15	1431	54	7681	0.064652	0.260045	0.277778	ENSG00000151632(AKR1C2)|ENSG00000198610(AKR1C4)|ENSG00000093010(COMT)|ENSG00000172817(CYP7B1)|ENSG00000138061(CYP1B1)|ENSG00000140465(CYP1A1)|ENSG00000167910(CYP7A1)|ENSG00000149084(HSD17B12)|ENSG00000106258(CYP3A5)|ENSG00000160870(CYP3A7)|ENSG00000145545(SRD5A1)|ENSG00000117594(HSD11B1)|ENSG00000198189(HSD17B11)|ENSG00000025423(HSD17B6)|ENSG00000108786(HSD17B1)	hsa:1646|hsa:1109|hsa:1312|hsa:9420|hsa:1545|hsa:1543|hsa:1581|hsa:51144|hsa:1577|hsa:1551|hsa:6715|hsa:3290|hsa:51170|hsa:8630|hsa:3292	http://www.kegg.jp/kegg-bin/show_pathway?hsa00140+hsa:1646+hsa:1109+hsa:1312+hsa:9420+hsa:1545+hsa:1543+hsa:1581+hsa:51144+hsa:1577+hsa:1551+hsa:6715+hsa:3290+hsa:51170+hsa:8630+hsa:3292
hsa04148	Efferocytosis	37	1431	156	7681	0.0642485	0.260045	0.237179	ENSG00000172216(CEBPB)|ENSG00000012779(ALOX5)|ENSG00000025434(NR1H3)|ENSG00000068650(ATP11A)|ENSG00000120875(DUSP4)|ENSG00000101307(SIRPB1)|ENSG00000198053(SIRPA)|ENSG00000006715(VPS41)|ENSG00000110218(PANX1)|ENSG00000186350(RXRA)|ENSG00000050820(BCAR1)|ENSG00000040487(SLC66A1)|ENSG00000142512(SIGLEC10)|ENSG00000096968(JAK2)|ENSG00000123384(LRP1)|ENSG00000103066(PLA2G15)|ENSG00000150760(DOCK1)|EN…	hsa:1051|hsa:240|hsa:10062|hsa:23250|hsa:1846|hsa:10326|hsa:140885|hsa:27072|hsa:24145|hsa:6256|hsa:9564|hsa:54896|hsa:89790|hsa:3717|hsa:4035|hsa:23659|hsa:1793|hsa:3685|hsa:558|hsa:1374|hsa:8754|hsa:3988|hsa:5777|hsa:7879|hsa:8578|hsa:8877|hsa:55754|hsa:5029|hsa:5031|hsa:834|hsa:6446|hsa:712|hsa:714|hsa:713|hsa:5468|hsa:3586|hsa:338382	http://www.kegg.jp/kegg-bin/show_pathway?hsa04148+hsa:1051+hsa:240+hsa:10062+hsa:23250+hsa:1846+hsa:10326+hsa:140885+hsa:27072+hsa:24145+hsa:6256+hsa:9564+hsa:54896+hsa:89790+hsa:3717+hsa:4035+hsa:23659+hsa:1793+hsa:3685+hsa:558+hsa:1374+hsa:8754+hsa:3988+hsa:5777+hsa:7879+hsa:8578+hsa:8877+hsa:55754+hsa:5029+hsa:5031+hsa:834+hsa:6446+hsa:712+hsa:714+hsa:713+hsa:5468+hsa:3586+hsa:338382
hsa00980	Metabolism of xenobiotics by cytochrome P450	17	1431	63	7681	0.0654655	0.260423	0.269841	ENSG00000159228(CBR1)|ENSG00000008394(MGST1)|ENSG00000148834(GSTO1)|ENSG00000006534(ALDH3B1)|ENSG00000162482(AKR7A3)|ENSG00000133433(GSTT2B)|ENSG00000138061(CYP1B1)|ENSG00000140465(CYP1A1)|ENSG00000104808(DHDH)|ENSG00000106258(CYP3A5)|ENSG00000134202(GSTM3)|ENSG00000167600(CYP2S1)|ENSG00000143198(MGST3)|ENSG00000108602(ALDH3A1)|ENSG00000117594(HSD11B1)|ENSG00000085871(MGST2)|ENSG00000084207(GSTP1)	hsa:873|hsa:4257|hsa:9446|hsa:221|hsa:22977|hsa:653689|hsa:1545|hsa:1543|hsa:27294|hsa:1577|hsa:2947|hsa:29785|hsa:4259|hsa:218|hsa:3290|hsa:4258|hsa:2950	http://www.kegg.jp/kegg-bin/show_pathway?hsa00980+hsa:873+hsa:4257+hsa:9446+hsa:221+hsa:22977+hsa:653689+hsa:1545+hsa:1543+hsa:27294+hsa:1577+hsa:2947+hsa:29785+hsa:4259+hsa:218+hsa:3290+hsa:4258+hsa:2950
hsa03266	Virion - Herpesvirus	4	1431	9	7681	0.0685183	0.269605	0.444444	ENSG00000110400(NECTIN1)|ENSG00000085514(PILRA)|ENSG00000130202(NECTIN2)|ENSG00000157873(TNFRSF14)	hsa:5818|hsa:29992|hsa:5819|hsa:8764	http://www.kegg.jp/kegg-bin/show_pathway?hsa03266+hsa:5818+hsa:29992+hsa:5819+hsa:8764
hsa00730	Thiamine metabolism	5	1431	13	7681	0.0769267	0.299435	0.384615	ENSG00000259431(THTPA)|ENSG00000162433(AK4)|ENSG00000165695(AK8)|ENSG00000135778(NTPCR)|ENSG00000004455(AK2)	hsa:79178|hsa:205|hsa:158067|hsa:84284|hsa:204	http://www.kegg.jp/kegg-bin/show_pathway?hsa00730+hsa:79178+hsa:205+hsa:158067+hsa:84284+hsa:204
hsa04630	JAK-STAT signaling pathway	36	1431	154	7681	0.0800001	0.308085	0.233766	ENSG00000099985(OSM)|ENSG00000128342(LIF)|ENSG00000185291(IL3RA)|ENSG00000100368(CSF2RB)|ENSG00000134470(IL15RA)|ENSG00000100311(PDGFB)|ENSG00000180008(SOCS4)|ENSG00000170677(SOCS6)|ENSG00000131724(IL13RA1)|ENSG00000124334(IL9R)|ENSG00000185436(IFNLR1)|ENSG00000110092(CCND1)|ENSG00000104432(IL7)|ENSG00000145777(TSLP)|ENSG00000164400(CSF2)|ENSG00000145839(IL9)|ENSG00000198223(CSF2RA)|ENSG000000969…	hsa:5008|hsa:3976|hsa:3563|hsa:1439|hsa:3601|hsa:5155|hsa:122809|hsa:9306|hsa:3597|hsa:3581|hsa:163702|hsa:595|hsa:3574|hsa:85480|hsa:1437|hsa:3578|hsa:1438|hsa:3717|hsa:5156|hsa:246778|hsa:3562|hsa:3458|hsa:1026|hsa:3600|hsa:1489|hsa:316|hsa:5777|hsa:10254|hsa:3467|hsa:59067|hsa:6772|hsa:133396|hsa:3586|hsa:11009|hsa:29949|hsa:50604	http://www.kegg.jp/kegg-bin/show_pathway?hsa04630+hsa:5008+hsa:3976+hsa:3563+hsa:1439+hsa:3601+hsa:5155+hsa:122809+hsa:9306+hsa:3597+hsa:3581+hsa:163702+hsa:595+hsa:3574+hsa:85480+hsa:1437+hsa:3578+hsa:1438+hsa:3717+hsa:5156+hsa:246778+hsa:3562+hsa:3458+hsa:1026+hsa:3600+hsa:1489+hsa:316+hsa:5777+hsa:10254+hsa:3467+hsa:59067+hsa:6772+hsa:133396+hsa:3586+hsa:11009+hsa:29949+hsa:50604
hsa00400	Phenylalanine, tyrosine and tryptophan biosynthesis	3	1431	6	7681	0.0827001	0.311848	0.5	ENSG00000120053(GOT1)|ENSG00000171759(PAH)|ENSG00000104951(IL4I1)	hsa:2805|hsa:5053|hsa:259307	http://www.kegg.jp/kegg-bin/show_pathway?hsa00400+hsa:2805+hsa:5053+hsa:259307
hsa04140	Autophagy - animal	38	1431	164	7681	0.082117	0.311848	0.231707	ENSG00000185896(LAMP1)|ENSG00000185950(IRS2)|ENSG00000101844(ATG4A)|ENSG00000148572(NRBF2)|ENSG00000196730(DAPK1)|ENSG00000006715(VPS41)|ENSG00000116954(RRAGC)|ENSG00000079950(STX7)|ENSG00000164253(WDR41)|ENSG00000140941(MAP1LC3B)|ENSG00000025039(RRAGD)|ENSG00000099940(SNAP29)|ENSG00000258102(MAP1LC3B2)|ENSG00000125703(ATG4C)|ENSG00000158186(MRAS)|ENSG00000057663(ATG5)|ENSG00000118640(VAMP8)|ENSG…	hsa:3916|hsa:8660|hsa:115201|hsa:29982|hsa:1612|hsa:27072|hsa:64121|hsa:8417|hsa:55255|hsa:81631|hsa:58528|hsa:9342|hsa:643246|hsa:84938|hsa:22808|hsa:9474|hsa:8673|hsa:6009|hsa:51100|hsa:3920|hsa:5861|hsa:1514|hsa:10670|hsa:8878|hsa:84335|hsa:1508|hsa:5516|hsa:55062|hsa:6237|hsa:7879|hsa:23001|hsa:1509|hsa:7316|hsa:64689|hsa:60673|hsa:11337|hsa:338382|hsa:440738	http://www.kegg.jp/kegg-bin/show_pathway?hsa04140+hsa:3916+hsa:8660+hsa:115201+hsa:29982+hsa:1612+hsa:27072+hsa:64121+hsa:8417+hsa:55255+hsa:81631+hsa:58528+hsa:9342+hsa:643246+hsa:84938+hsa:22808+hsa:9474+hsa:8673+hsa:6009+hsa:51100+hsa:3920+hsa:5861+hsa:1514+hsa:10670+hsa:8878+hsa:84335+hsa:1508+hsa:5516+hsa:55062+hsa:6237+hsa:7879+hsa:23001+hsa:1509+hsa:7316+hsa:64689+hsa:60673+hsa:11337+hsa:3…
hsa05204	Chemical carcinogenesis - DNA adducts	15	1431	56	7681	0.0846781	0.316015	0.267857	ENSG00000159228(CBR1)|ENSG00000151632(AKR1C2)|ENSG00000008394(MGST1)|ENSG00000148834(GSTO1)|ENSG00000133433(GSTT2B)|ENSG00000138061(CYP1B1)|ENSG00000140465(CYP1A1)|ENSG00000171428(NAT1)|ENSG00000106258(CYP3A5)|ENSG00000160870(CYP3A7)|ENSG00000134202(GSTM3)|ENSG00000143198(MGST3)|ENSG00000117594(HSD11B1)|ENSG00000085871(MGST2)|ENSG00000084207(GSTP1)	hsa:873|hsa:1646|hsa:4257|hsa:9446|hsa:653689|hsa:1545|hsa:1543|hsa:9|hsa:1577|hsa:1551|hsa:2947|hsa:4259|hsa:3290|hsa:4258|hsa:2950	http://www.kegg.jp/kegg-bin/show_pathway?hsa05204+hsa:873+hsa:1646+hsa:4257+hsa:9446+hsa:653689+hsa:1545+hsa:1543+hsa:9+hsa:1577+hsa:1551+hsa:2947+hsa:4259+hsa:3290+hsa:4258+hsa:2950
hsa04144	Endocytosis	55	1431	248	7681	0.0864934	0.319496	0.221774	ENSG00000255112(CHMP1B)|ENSG00000168461(RAB31)|ENSG00000133104(SPART)|ENSG00000206503(HLA-A)|ENSG00000155975(VPS37A)|ENSG00000170248(PDCD6IP)|ENSG00000156675(RAB11FIP1)|ENSG00000069329(VPS35)|ENSG00000241685(ARPC1A)|ENSG00000137486(ARRB1)|ENSG00000130724(CHMP2A)|ENSG00000153071(DAB2)|ENSG00000147164(SNX12)|ENSG00000164695(CHMP4C)|ENSG00000086065(CHMP5)|ENSG00000099290(WASHC2A)|ENSG00000109971(HSP…	hsa:57132|hsa:11031|hsa:23111|hsa:3105|hsa:137492|hsa:10015|hsa:80223|hsa:55737|hsa:10552|hsa:408|hsa:27243|hsa:1601|hsa:29934|hsa:92421|hsa:51510|hsa:387680|hsa:3312|hsa:8723|hsa:8724|hsa:9829|hsa:5156|hsa:8411|hsa:23096|hsa:6643|hsa:51100|hsa:5337|hsa:10096|hsa:138429|hsa:116988|hsa:3134|hsa:3579|hsa:1175|hsa:830|hsa:9765|hsa:9559|hsa:1211|hsa:378|hsa:644150|hsa:3303|hsa:3304|hsa:10254|hsa:7879…	http://www.kegg.jp/kegg-bin/show_pathway?hsa04144+hsa:57132+hsa:11031+hsa:23111+hsa:3105+hsa:137492+hsa:10015+hsa:80223+hsa:55737+hsa:10552+hsa:408+hsa:27243+hsa:1601+hsa:29934+hsa:92421+hsa:51510+hsa:387680+hsa:3312+hsa:8723+hsa:8724+hsa:9829+hsa:5156+hsa:8411+hsa:23096+hsa:6643+hsa:51100+hsa:5337+hsa:10096+hsa:138429+hsa:116988+hsa:3134+hsa:3579+hsa:1175+hsa:830+hsa:9765+hsa:9559+hsa:1211+hsa:3…
hsa04964	Proximal tubule bicarbonate reclamation	7	1431	22	7681	0.0987028	0.360913	0.318182	ENSG00000137731(FXYD2)|ENSG00000104267(CA2)|ENSG00000100889(PCK2)|ENSG00000069849(ATP1B3)|ENSG00000129244(ATP1B2)|ENSG00000143153(ATP1B1)|ENSG00000014641(MDH1)	hsa:486|hsa:760|hsa:5106|hsa:483|hsa:482|hsa:481|hsa:4190	http://www.kegg.jp/kegg-bin/show_pathway?hsa04964+hsa:486+hsa:760+hsa:5106+hsa:483+hsa:482+hsa:481+hsa:4190
hsa05322	Systemic lupus erythematosus	29	1431	125	7681	0.115377	0.417664	0.232	ENSG00000197561(ELANE)|ENSG00000101017(CD40)|ENSG00000114013(CD86)|ENSG00000111537(IFNG)|ENSG00000125730(C3)|ENSG00000274997(H2AC12)|ENSG00000276410(H2BC3)|ENSG00000287080(H3C3)|ENSG00000182326(C1S)|ENSG00000159403(C1R)|ENSG00000242574(HLA-DMB)|ENSG00000204257(HLA-DMA)|ENSG00000237541(HLA-DQA2)|ENSG00000237541(HLA-DQA2)|ENSG00000232629(HLA-DQB2)|ENSG00000276903(H2AC16)|ENSG00000275379(H3C11)|ENSG…	hsa:1991|hsa:958|hsa:942|hsa:3458|hsa:718|hsa:85235|hsa:3018|hsa:8352|hsa:716|hsa:715|hsa:3109|hsa:3108|hsa:3117|hsa:3118|hsa:3120|hsa:8332|hsa:8354|hsa:3122|hsa:717|hsa:8339|hsa:3111|hsa:3113|hsa:3115|hsa:712|hsa:714|hsa:713|hsa:2212|hsa:3586|hsa:2209	http://www.kegg.jp/kegg-bin/show_pathway?hsa05322+hsa:1991+hsa:958+hsa:942+hsa:3458+hsa:718+hsa:85235+hsa:3018+hsa:8352+hsa:716+hsa:715+hsa:3109+hsa:3108+hsa:3117+hsa:3118+hsa:3120+hsa:8332+hsa:8354+hsa:3122+hsa:717+hsa:8339+hsa:3111+hsa:3113+hsa:3115+hsa:712+hsa:714+hsa:713+hsa:2212+hsa:3586+hsa:2209
hsa00900	Terpenoid backbone biosynthesis	7	1431	23	7681	0.120149	0.430634	0.304348	ENSG00000116237(ICMT)|ENSG00000117682(DHDDS)|ENSG00000153989(NUS1)|ENSG00000116005(PCYOX1)|ENSG00000120437(ACAT2)|ENSG00000163344(PMVK)|ENSG00000084073(ZMPSTE24)	hsa:23463|hsa:79947|hsa:116150|hsa:51449|hsa:39|hsa:10654|hsa:10269	http://www.kegg.jp/kegg-bin/show_pathway?hsa00900+hsa:23463+hsa:79947+hsa:116150+hsa:51449+hsa:39+hsa:10654+hsa:10269
hsa05144	Malaria	13	1431	50	7681	0.124745	0.442724	0.26	ENSG00000108691(CCL2)|ENSG00000019991(HGF)|ENSG00000136869(TLR4)|ENSG00000169429(CXCL8)|ENSG00000101017(CD40)|ENSG00000169439(SDC2)|ENSG00000123384(LRP1)|ENSG00000111537(IFNG)|ENSG00000110651(CD81)|ENSG00000105976(MET)|ENSG00000197721(CR1L)|ENSG00000115884(SDC1)|ENSG00000136634(IL10)	hsa:6347|hsa:3082|hsa:7099|hsa:3576|hsa:958|hsa:6383|hsa:4035|hsa:3458|hsa:975|hsa:4233|hsa:1379|hsa:6382|hsa:3586	http://www.kegg.jp/kegg-bin/show_pathway?hsa05144+hsa:6347+hsa:3082+hsa:7099+hsa:3576+hsa:958+hsa:6383+hsa:4035+hsa:3458+hsa:975+hsa:4233+hsa:1379+hsa:6382+hsa:3586
hsa00565	Ether lipid metabolism	12	1431	46	7681	0.134099	0.46001	0.26087	ENSG00000141934(PLPP2)|ENSG00000087253(LPCAT2)|ENSG00000162407(PLPP3)|ENSG00000105499(PLA2G4C)|ENSG00000075651(PLD1)|ENSG00000105223(PLD3)|ENSG00000164303(ENPP6)|ENSG00000116711(PLA2G4A)|ENSG00000146070(PLA2G7)|ENSG00000176485(PLAAT3)|ENSG00000129219(PLD2)|ENSG00000018510(AGPS)	hsa:8612|hsa:54947|hsa:8613|hsa:8605|hsa:5337|hsa:23646|hsa:133121|hsa:5321|hsa:7941|hsa:11145|hsa:5338|hsa:8540	http://www.kegg.jp/kegg-bin/show_pathway?hsa00565+hsa:8612+hsa:54947+hsa:8613+hsa:8605+hsa:5337+hsa:23646+hsa:133121+hsa:5321+hsa:7941+hsa:11145+hsa:5338+hsa:8540
hsa00630	Glyoxylate and dicarboxylate metabolism	8	1431	28	7681	0.134699	0.46001	0.285714	ENSG00000131069(ACSS2)|ENSG00000121691(CAT)|ENSG00000184207(PGP)|ENSG00000120437(ACAT2)|ENSG00000122729(ACO1)|ENSG00000135821(GLUL)|ENSG00000183077(AFMID)|ENSG00000014641(MDH1)	hsa:55902|hsa:847|hsa:283871|hsa:39|hsa:48|hsa:2752|hsa:125061|hsa:4190	http://www.kegg.jp/kegg-bin/show_pathway?hsa00630+hsa:55902+hsa:847+hsa:283871+hsa:39+hsa:48+hsa:2752+hsa:125061+hsa:4190
hsa04392	Hippo signaling pathway - multiple species	8	1431	28	7681	0.134699	0.46001	0.285714	ENSG00000150457(LATS2)|ENSG00000197905(TEAD4)|ENSG00000107551(RASSF4)|ENSG00000142279(WTIP)|ENSG00000151748(SAV1)|ENSG00000139926(FRMD6)|ENSG00000104375(STK3)|ENSG00000149269(PAK1)	hsa:26524|hsa:7004|hsa:83937|hsa:126374|hsa:60485|hsa:122786|hsa:6788|hsa:5058	http://www.kegg.jp/kegg-bin/show_pathway?hsa04392+hsa:26524+hsa:7004+hsa:83937+hsa:126374+hsa:60485+hsa:122786+hsa:6788+hsa:5058
hsa04657	IL-17 signaling pathway	22	1431	93	7681	0.132765	0.46001	0.236559	ENSG00000172216(CEBPB)|ENSG00000172458(IL17D)|ENSG00000170345(FOS)|ENSG00000213341(CHUK)|ENSG00000108688(CCL7)|ENSG00000108691(CCL2)|ENSG00000102970(CCL17)|ENSG00000163735(CXCL5)|ENSG00000163739(CXCL1)|ENSG00000164400(CSF2)|ENSG00000056972(TRAF3IP2)|ENSG00000169429(CXCL8)|ENSG00000124875(CXCL6)|ENSG00000125740(FOSB)|ENSG00000111537(IFNG)|ENSG00000163220(S100A9)|ENSG00000175592(FOSL1)|ENSG00000069…	hsa:1051|hsa:53342|hsa:2353|hsa:1147|hsa:6354|hsa:6347|hsa:6361|hsa:6374|hsa:2919|hsa:1437|hsa:10758|hsa:3576|hsa:6372|hsa:2354|hsa:3458|hsa:6280|hsa:8061|hsa:5597|hsa:4312|hsa:55540|hsa:4314|hsa:3725	http://www.kegg.jp/kegg-bin/show_pathway?hsa04657+hsa:1051+hsa:53342+hsa:2353+hsa:1147+hsa:6354+hsa:6347+hsa:6361+hsa:6374+hsa:2919+hsa:1437+hsa:10758+hsa:3576+hsa:6372+hsa:2354+hsa:3458+hsa:6280+hsa:8061+hsa:5597+hsa:4312+hsa:55540+hsa:4314+hsa:3725
hsa00760	Nicotinate and nicotinamide metabolism	10	1431	37	7681	0.136064	0.460328	0.27027	ENSG00000077009(NMRK2)|ENSG00000173614(NMNAT1)|ENSG00000103485(QPRT)|ENSG00000112874(NUDT12)|ENSG00000144130(NT5DC4)|ENSG00000138356(AOX1)|ENSG00000109743(BST1)|ENSG00000166741(NNMT)|ENSG00000147813(NAPRT)|ENSG00000008130(NADK)	hsa:27231|hsa:64802|hsa:23475|hsa:83594|hsa:284958|hsa:316|hsa:683|hsa:4837|hsa:93100|hsa:65220	http://www.kegg.jp/kegg-bin/show_pathway?hsa00760+hsa:27231+hsa:64802+hsa:23475+hsa:83594+hsa:284958+hsa:316+hsa:683+hsa:4837+hsa:93100+hsa:65220
hsa05321	Inflammatory bowel disease	16	1431	65	7681	0.139809	0.468618	0.246154	ENSG00000136869(TLR4)|ENSG00000111537(IFNG)|ENSG00000242574(HLA-DMB)|ENSG00000204257(HLA-DMA)|ENSG00000237541(HLA-DQA2)|ENSG00000237541(HLA-DQA2)|ENSG00000232629(HLA-DQB2)|ENSG00000115008(IL1A)|ENSG00000138684(IL21)|ENSG00000204287(HLA-DRA)|ENSG00000204252(HLA-DOA)|ENSG00000231389(HLA-DPA1)|ENSG00000223865(HLA-DPB1)|ENSG00000115415(STAT1)|ENSG00000136634(IL10)|ENSG00000177606(JUN)	hsa:7099|hsa:3458|hsa:3109|hsa:3108|hsa:3117|hsa:3118|hsa:3120|hsa:3552|hsa:59067|hsa:3122|hsa:3111|hsa:3113|hsa:3115|hsa:6772|hsa:3586|hsa:3725	http://www.kegg.jp/kegg-bin/show_pathway?hsa05321+hsa:7099+hsa:3458+hsa:3109+hsa:3108+hsa:3117+hsa:3118+hsa:3120+hsa:3552+hsa:59067+hsa:3122+hsa:3111+hsa:3113+hsa:3115+hsa:6772+hsa:3586+hsa:3725
hsa03272	Virion - Hepatitis viruses	11	1431	42	7681	0.144329	0.47933	0.261905	ENSG00000255112(CHMP1B)|ENSG00000185896(LAMP1)|ENSG00000253958(CLDN23)|ENSG00000170248(PDCD6IP)|ENSG00000005893(LAMP2)|ENSG00000110651(CD81)|ENSG00000157224(CLDN12)|ENSG00000135404(CD63)|ENSG00000010278(CD9)|ENSG00000073060(SCARB1)|ENSG00000181885(CLDN7)	hsa:57132|hsa:3916|hsa:137075|hsa:10015|hsa:3920|hsa:975|hsa:9069|hsa:967|hsa:928|hsa:949|hsa:1366	http://www.kegg.jp/kegg-bin/show_pathway?hsa03272+hsa:57132+hsa:3916+hsa:137075+hsa:10015+hsa:3920+hsa:975+hsa:9069+hsa:967+hsa:928+hsa:949+hsa:1366
hsa00100	Steroid biosynthesis	6	1431	20	7681	0.153108	0.503866	0.3	ENSG00000147383(NSDHL)|ENSG00000116133(DHCR24)|ENSG00000052802(MSMO1)|ENSG00000111012(CYP27B1)|ENSG00000107798(LIPA)|ENSG00000057252(SOAT1)	hsa:50814|hsa:1718|hsa:6307|hsa:1594|hsa:3988|hsa:6646	http://www.kegg.jp/kegg-bin/show_pathway?hsa00100+hsa:50814+hsa:1718+hsa:6307+hsa:1594+hsa:3988+hsa:6646
hsa03273	Virion - Lassa virus and SFTS virus	5	1431	16	7681	0.162285	0.529252	0.3125	ENSG00000185896(LAMP1)|ENSG00000005893(LAMP2)|ENSG00000090659(CD209)|ENSG00000072274(TFRC)|ENSG00000118257(NRP2)	hsa:3916|hsa:3920|hsa:30835|hsa:7037|hsa:8828	http://www.kegg.jp/kegg-bin/show_pathway?hsa03273+hsa:3916+hsa:3920+hsa:30835+hsa:7037+hsa:8828
hsa00250	Alanine, aspartate and glutamate metabolism	9	1431	34	7681	0.167922	0.542748	0.264706	ENSG00000162174(ASRGL1)|ENSG00000120053(GOT1)|ENSG00000114021(NIT2)|ENSG00000185100(ADSS1)|ENSG00000203797(DDO)|ENSG00000104951(IL4I1)|ENSG00000128683(GAD1)|ENSG00000135821(GLUL)|ENSG00000198380(GFPT1)	hsa:80150|hsa:2805|hsa:56954|hsa:122622|hsa:8528|hsa:259307|hsa:2571|hsa:2752|hsa:2673	http://www.kegg.jp/kegg-bin/show_pathway?hsa00250+hsa:80150+hsa:2805+hsa:56954+hsa:122622+hsa:8528+hsa:259307+hsa:2571+hsa:2752+hsa:2673
hsa03265	Virion - Ebolavirus, Lyssavirus and Morbillivirus	4	1431	12	7681	0.170196	0.545231	0.333333	ENSG00000090659(CD209)|ENSG00000072694(FCGR2B)|ENSG00000141505(ASGR1)|ENSG00000143217(NECTIN4)	hsa:30835|hsa:2213|hsa:432|hsa:81607	http://www.kegg.jp/kegg-bin/show_pathway?hsa03265+hsa:30835+hsa:2213+hsa:432+hsa:81607
hsa00982	Drug metabolism - cytochrome P450	14	1431	58	7681	0.17903	0.568499	0.241379	ENSG00000008394(MGST1)|ENSG00000148834(GSTO1)|ENSG00000006534(ALDH3B1)|ENSG00000133433(GSTT2B)|ENSG00000189221(MAOA)|ENSG00000106258(CYP3A5)|ENSG00000134202(GSTM3)|ENSG00000138356(AOX1)|ENSG00000143198(MGST3)|ENSG00000108602(ALDH3A1)|ENSG00000076258(FMO4)|ENSG00000010932(FMO1)|ENSG00000085871(MGST2)|ENSG00000084207(GSTP1)	hsa:4257|hsa:9446|hsa:221|hsa:653689|hsa:4128|hsa:1577|hsa:2947|hsa:316|hsa:4259|hsa:218|hsa:2329|hsa:2326|hsa:4258|hsa:2950	http://www.kegg.jp/kegg-bin/show_pathway?hsa00982+hsa:4257+hsa:9446+hsa:221+hsa:653689+hsa:4128+hsa:1577+hsa:2947+hsa:316+hsa:4259+hsa:218+hsa:2329+hsa:2326+hsa:4258+hsa:2950
hsa00053	Ascorbate and aldarate metabolism	6	1431	21	7681	0.182535	0.569634	0.285714	ENSG00000133116(KL)|ENSG00000111275(ALDH2)|ENSG00000164904(ALDH7A1)|ENSG00000109814(UGDH)|ENSG00000072210(ALDH3A2)|ENSG00000117448(AKR1A1)	hsa:9365|hsa:217|hsa:501|hsa:7358|hsa:224|hsa:10327	http://www.kegg.jp/kegg-bin/show_pathway?hsa00053+hsa:9365+hsa:217+hsa:501+hsa:7358+hsa:224+hsa:10327
hsa00770	Pantothenate and CoA biosynthesis	6	1431	21	7681	0.182535	0.569634	0.285714	ENSG00000060982(BCAT1)|ENSG00000127125(PPCS)|ENSG00000112299(VNN1)|ENSG00000111275(ALDH2)|ENSG00000072210(ALDH3A2)|ENSG00000147647(DPYS)	hsa:586|hsa:79717|hsa:8876|hsa:217|hsa:224|hsa:1807	http://www.kegg.jp/kegg-bin/show_pathway?hsa00770+hsa:586+hsa:79717+hsa:8876+hsa:217+hsa:224+hsa:1807
hsa04913	Ovarian steroidogenesis	12	1431	49	7681	0.188666	0.583736	0.244898	ENSG00000012779(ALOX5)|ENSG00000171105(INSR)|ENSG00000184227(ACOT1)|ENSG00000138061(CYP1B1)|ENSG00000140465(CYP1A1)|ENSG00000105499(PLA2G4C)|ENSG00000155897(ADCY8)|ENSG00000177465(ACOT4)|ENSG00000116711(PLA2G4A)|ENSG00000073060(SCARB1)|ENSG00000108786(HSD17B1)|ENSG00000138031(ADCY3)	hsa:240|hsa:3643|hsa:641371|hsa:1545|hsa:1543|hsa:8605|hsa:114|hsa:122970|hsa:5321|hsa:949|hsa:3292|hsa:109	http://www.kegg.jp/kegg-bin/show_pathway?hsa04913+hsa:240+hsa:3643+hsa:641371+hsa:1545+hsa:1543+hsa:8605+hsa:114+hsa:122970+hsa:5321+hsa:949+hsa:3292+hsa:109
hsa04213	Longevity regulating pathway - multiple species	14	1431	59	7681	0.196949	0.6042	0.237288	ENSG00000185950(IRS2)|ENSG00000121691(CAT)|ENSG00000171105(INSR)|ENSG00000196591(HDAC2)|ENSG00000109971(HSPA8)|ENSG00000057663(ATG5)|ENSG00000155897(ADCY8)|ENSG00000112096(SOD2)|ENSG00000204673(AKT1S1)|ENSG00000204389(HSPA1A)|ENSG00000204388(HSPA1B)|ENSG00000173110(HSPA6)|ENSG00000115592(PRKAG3)|ENSG00000138031(ADCY3)	hsa:8660|hsa:847|hsa:3643|hsa:3066|hsa:3312|hsa:9474|hsa:114|hsa:6648|hsa:84335|hsa:3303|hsa:3304|hsa:3310|hsa:53632|hsa:109	http://www.kegg.jp/kegg-bin/show_pathway?hsa04213+hsa:8660+hsa:847+hsa:3643+hsa:3066+hsa:3312+hsa:9474+hsa:114+hsa:6648+hsa:84335+hsa:3303+hsa:3304+hsa:3310+hsa:53632+hsa:109
hsa04115	p53 signaling pathway	17	1431	74	7681	0.204731	0.622796	0.22973	ENSG00000015475(BID)|ENSG00000130222(GADD45G)|ENSG00000183765(CHEK2)|ENSG00000172115(CYCS)|ENSG00000110092(CCND1)|ENSG00000130766(SESN2)|ENSG00000115129(TP53I3)|ENSG00000048392(RRM2B)|ENSG00000124762(CDKN1A)|ENSG00000105327(BBC3)|ENSG00000087088(BAX)|ENSG00000042286(AIFM2)|ENSG00000135446(CDK4)|ENSG00000115107(STEAP3)|ENSG00000161642(ZNF385A)|ENSG00000163743(RCHY1)|ENSG00000135679(MDM2)	hsa:637|hsa:10912|hsa:11200|hsa:54205|hsa:595|hsa:83667|hsa:9540|hsa:50484|hsa:1026|hsa:27113|hsa:581|hsa:84883|hsa:1019|hsa:55240|hsa:25946|hsa:25898|hsa:4193	http://www.kegg.jp/kegg-bin/show_pathway?hsa04115+hsa:637+hsa:10912+hsa:11200+hsa:54205+hsa:595+hsa:83667+hsa:9540+hsa:50484+hsa:1026+hsa:27113+hsa:581+hsa:84883+hsa:1019+hsa:55240+hsa:25946+hsa:25898+hsa:4193
hsa00564	Glycerophospholipid metabolism	22	1431	99	7681	0.210716	0.63566	0.222222	ENSG00000141934(PLPP2)|ENSG00000167588(GPD1)|ENSG00000132793(LPIN3)|ENSG00000087253(LPCAT2)|ENSG00000162407(PLPP3)|ENSG00000163624(CDS1)|ENSG00000138678(GPAT3)|ENSG00000105499(PLA2G4C)|ENSG00000075651(PLD1)|ENSG00000105223(PLD3)|ENSG00000169692(AGPAT2)|ENSG00000103066(PLA2G15)|ENSG00000058866(DGKG)|ENSG00000032444(PNPLA6)|ENSG00000116711(PLA2G4A)|ENSG00000157680(DGKI)|ENSG00000115159(GPD2)|ENSG00…	hsa:8612|hsa:2819|hsa:64900|hsa:54947|hsa:8613|hsa:1040|hsa:84803|hsa:8605|hsa:5337|hsa:23646|hsa:10555|hsa:23659|hsa:1608|hsa:10908|hsa:5321|hsa:9162|hsa:2820|hsa:11313|hsa:79143|hsa:11145|hsa:5338|hsa:166929	http://www.kegg.jp/kegg-bin/show_pathway?hsa00564+hsa:8612+hsa:2819+hsa:64900+hsa:54947+hsa:8613+hsa:1040+hsa:84803+hsa:8605+hsa:5337+hsa:23646+hsa:10555+hsa:23659+hsa:1608+hsa:10908+hsa:5321+hsa:9162+hsa:2820+hsa:11313+hsa:79143+hsa:11145+hsa:5338+hsa:166929
hsa05219	Bladder cancer	10	1431	41	7681	0.221457	0.662541	0.243902	ENSG00000196730(DAPK1)|ENSG00000110092(CCND1)|ENSG00000087245(MMP2)|ENSG00000169429(CXCL8)|ENSG00000124762(CDKN1A)|ENSG00000135446(CDK4)|ENSG00000112715(VEGFA)|ENSG00000113070(HBEGF)|ENSG00000196611(MMP1)|ENSG00000135679(MDM2)	hsa:1612|hsa:595|hsa:4313|hsa:3576|hsa:1026|hsa:1019|hsa:7422|hsa:1839|hsa:4312|hsa:4193	http://www.kegg.jp/kegg-bin/show_pathway?hsa05219+hsa:1612+hsa:595+hsa:4313+hsa:3576+hsa:1026+hsa:1019+hsa:7422+hsa:1839+hsa:4312+hsa:4193
hsa00650	Butanoate metabolism	7	1431	27	7681	0.22592	0.670353	0.259259	ENSG00000117305(HMGCL)|ENSG00000120437(ACAT2)|ENSG00000113790(EHHADH)|ENSG00000127884(ECHS1)|ENSG00000183549(ACSM5)|ENSG00000128683(GAD1)|ENSG00000138796(HADH)	hsa:3155|hsa:39|hsa:1962|hsa:1892|hsa:54988|hsa:2571|hsa:3033	http://www.kegg.jp/kegg-bin/show_pathway?hsa00650+hsa:3155+hsa:39+hsa:1962+hsa:1892+hsa:54988+hsa:2571+hsa:3033
hsa00524	Neomycin, kanamycin and gentamicin biosynthesis	2	1431	5	7681	0.234902	0.680277	0.4	ENSG00000159399(HK2)|ENSG00000160883(HK3)	hsa:3099|hsa:3101	http://www.kegg.jp/kegg-bin/show_pathway?hsa00524+hsa:3099+hsa:3101
hsa00640	Propanoate metabolism	8	1431	32	7681	0.234509	0.680277	0.25	ENSG00000131069(ACSS2)|ENSG00000136143(SUCLA2)|ENSG00000171989(LDHAL6B)|ENSG00000163541(SUCLG1)|ENSG00000113790(EHHADH)|ENSG00000127884(ECHS1)|ENSG00000161533(ACOX1)|ENSG00000093144(ECHDC1)	hsa:55902|hsa:8803|hsa:92483|hsa:8802|hsa:1962|hsa:1892|hsa:51|hsa:55862	http://www.kegg.jp/kegg-bin/show_pathway?hsa00640+hsa:55902+hsa:8803+hsa:92483+hsa:8802+hsa:1962+hsa:1892+hsa:51+hsa:55862
hsa03260	Virion - Human immunodeficiency virus	2	1431	5	7681	0.234902	0.680277	0.4	ENSG00000090659(CD209)|ENSG00000160791(CCR5)	hsa:30835|hsa:1234	http://www.kegg.jp/kegg-bin/show_pathway?hsa03260+hsa:30835+hsa:1234
hsa04975	Fat digestion and absorption	9	1431	37	7681	0.240834	0.69192	0.243243	ENSG00000141934(PLPP2)|ENSG00000162407(PLPP3)|ENSG00000062282(DGAT2)|ENSG00000169692(AGPAT2)|ENSG00000120437(ACAT2)|ENSG00000185000(DGAT1)|ENSG00000138823(MTTP)|ENSG00000073060(SCARB1)|ENSG00000138075(ABCG5)	hsa:8612|hsa:8613|hsa:84649|hsa:10555|hsa:39|hsa:8694|hsa:4547|hsa:949|hsa:64240	http://www.kegg.jp/kegg-bin/show_pathway?hsa04975+hsa:8612+hsa:8613+hsa:84649+hsa:10555+hsa:39+hsa:8694+hsa:4547+hsa:949+hsa:64240
hsa04961	Endocrine and other factor-regulated calcium reabsorption	12	1431	52	7681	0.251782	0.717679	0.230769	ENSG00000133116(KL)|ENSG00000137731(FXYD2)|ENSG00000167751(KLK2)|ENSG00000183023(SLC8A1)|ENSG00000069849(ATP1B3)|ENSG00000042753(AP2S1)|ENSG00000122705(CLTA)|ENSG00000129244(ATP1B2)|ENSG00000149782(PLCB3)|ENSG00000127412(TRPV5)|ENSG00000111424(VDR)|ENSG00000143153(ATP1B1)	hsa:9365|hsa:486|hsa:3817|hsa:6546|hsa:483|hsa:1175|hsa:1211|hsa:482|hsa:5331|hsa:56302|hsa:7421|hsa:481	http://www.kegg.jp/kegg-bin/show_pathway?hsa04961+hsa:9365+hsa:486+hsa:3817+hsa:6546+hsa:483+hsa:1175+hsa:1211+hsa:482+hsa:5331+hsa:56302+hsa:7421+hsa:481
hsa00983	Drug metabolism - other enzymes	15	1431	67	7681	0.25624	0.719061	0.223881	ENSG00000137364(TPMT)|ENSG00000008394(MGST1)|ENSG00000148834(GSTO1)|ENSG00000133433(GSTT2B)|ENSG00000048392(RRM2B)|ENSG00000198848(CES1)|ENSG00000171428(NAT1)|ENSG00000134202(GSTM3)|ENSG00000005381(MPO)|ENSG00000143198(MGST3)|ENSG00000166548(TK2)|ENSG00000147647(DPYS)|ENSG00000085871(MGST2)|ENSG00000158825(CDA)|ENSG00000084207(GSTP1)	hsa:7172|hsa:4257|hsa:9446|hsa:653689|hsa:50484|hsa:1066|hsa:9|hsa:2947|hsa:4353|hsa:4259|hsa:7084|hsa:1807|hsa:4258|hsa:978|hsa:2950	http://www.kegg.jp/kegg-bin/show_pathway?hsa00983+hsa:7172+hsa:4257+hsa:9446+hsa:653689+hsa:50484+hsa:1066+hsa:9+hsa:2947+hsa:4353+hsa:4259+hsa:7084+hsa:1807+hsa:4258+hsa:978+hsa:2950
hsa05221	Acute myeloid leukemia	15	1431	67	7681	0.25624	0.719061	0.223881	ENSG00000133101(CCNA1)|ENSG00000159216(RUNX1)|ENSG00000122025(FLT3)|ENSG00000187840(EIF4EBP1)|ENSG00000213341(CHUK)|ENSG00000148737(TCF7L2)|ENSG00000110092(CCND1)|ENSG00000245848(CEBPA)|ENSG00000164400(CSF2)|ENSG00000164399(IL3)|ENSG00000169896(ITGAM)|ENSG00000092067(CEBPE)|ENSG00000005381(MPO)|ENSG00000170458(CD14)|ENSG00000150337(FCGR1A)	hsa:8900|hsa:861|hsa:2322|hsa:1978|hsa:1147|hsa:6934|hsa:595|hsa:1050|hsa:1437|hsa:3562|hsa:3684|hsa:1053|hsa:4353|hsa:929|hsa:2209	http://www.kegg.jp/kegg-bin/show_pathway?hsa05221+hsa:8900+hsa:861+hsa:2322+hsa:1978+hsa:1147+hsa:6934+hsa:595+hsa:1050+hsa:1437+hsa:3562+hsa:3684+hsa:1053+hsa:4353+hsa:929+hsa:2209
hsa04723	Retrograde endocannabinoid signaling	30	1431	143	7681	0.263348	0.733323	0.20979	ENSG00000110717(NDUFS8)|ENSG00000164258(NDUFS4)|ENSG00000172380(GNG12)|ENSG00000174021(GNG5)|ENSG00000146276(GABRR1)|ENSG00000117480(FAAH)|ENSG00000155897(ADCY8)|ENSG00000119421(NDUFA8)|ENSG00000090266(NDUFB2)|ENSG00000004779(NDUFAB1)|ENSG00000115286(NDUFS7)|ENSG00000165264(NDUFB6)|ENSG00000183648(NDUFB1)|ENSG00000104888(SLC17A7)|ENSG00000145494(NDUFS6)|ENSG00000149782(PLCB3)|ENSG00000099795(NDUF…	hsa:4728|hsa:4724|hsa:55970|hsa:2787|hsa:2569|hsa:2166|hsa:114|hsa:4702|hsa:4708|hsa:4706|hsa:374291|hsa:4712|hsa:4707|hsa:57030|hsa:4726|hsa:5331|hsa:4713|hsa:4695|hsa:2790|hsa:59345|hsa:4718|hsa:4696|hsa:57406|hsa:4711|hsa:776|hsa:11343|hsa:4725|hsa:4720|hsa:109|hsa:4709	http://www.kegg.jp/kegg-bin/show_pathway?hsa04723+hsa:4728+hsa:4724+hsa:55970+hsa:2787+hsa:2569+hsa:2166+hsa:114+hsa:4702+hsa:4708+hsa:4706+hsa:374291+hsa:4712+hsa:4707+hsa:57030+hsa:4726+hsa:5331+hsa:4713+hsa:4695+hsa:2790+hsa:59345+hsa:4718+hsa:4696+hsa:57406+hsa:4711+hsa:776+hsa:11343+hsa:4725+hsa:4720+hsa:109+hsa:4709
hsa04973	Carbohydrate digestion and absorption	10	1431	43	7681	0.270529	0.74757	0.232558	ENSG00000137731(FXYD2)|ENSG00000159399(HK2)|ENSG00000069849(ATP1B3)|ENSG00000160883(HK3)|ENSG00000129244(ATP1B2)|ENSG00000149782(PLCB3)|ENSG00000143153(ATP1B1)|ENSG00000137700(SLC37A4)|ENSG00000141349(G6PC3)|ENSG00000157388(CACNA1D)	hsa:486|hsa:3099|hsa:483|hsa:3101|hsa:482|hsa:5331|hsa:481|hsa:2542|hsa:92579|hsa:776	http://www.kegg.jp/kegg-bin/show_pathway?hsa04973+hsa:486+hsa:3099+hsa:483+hsa:3101+hsa:482+hsa:5331+hsa:481+hsa:2542+hsa:92579+hsa:776
hsa04211	Longevity regulating pathway	19	1431	88	7681	0.274861	0.753785	0.215909	ENSG00000133116(KL)|ENSG00000185950(IRS2)|ENSG00000121691(CAT)|ENSG00000146592(CREB5)|ENSG00000171105(INSR)|ENSG00000187840(EIF4EBP1)|ENSG00000130766(SESN2)|ENSG00000107175(CREB3)|ENSG00000057663(ATG5)|ENSG00000106615(RHEB)|ENSG00000155897(ADCY8)|ENSG00000112096(SOD2)|ENSG00000087088(BAX)|ENSG00000006831(ADIPOR2)|ENSG00000204673(AKT1S1)|ENSG00000132170(PPARG)|ENSG00000123395(ATG101)|ENSG000001155…	hsa:9365|hsa:8660|hsa:847|hsa:9586|hsa:3643|hsa:1978|hsa:83667|hsa:10488|hsa:9474|hsa:6009|hsa:114|hsa:6648|hsa:581|hsa:79602|hsa:84335|hsa:5468|hsa:60673|hsa:53632|hsa:109	http://www.kegg.jp/kegg-bin/show_pathway?hsa04211+hsa:9365+hsa:8660+hsa:847+hsa:9586+hsa:3643+hsa:1978+hsa:83667+hsa:10488+hsa:9474+hsa:6009+hsa:114+hsa:6648+hsa:581+hsa:79602+hsa:84335+hsa:5468+hsa:60673+hsa:53632+hsa:109
hsa04928	Parathyroid hormone synthesis, secretion and action	24	1431	114	7681	0.286023	0.774425	0.210526	ENSG00000133116(KL)|ENSG00000146592(CREB5)|ENSG00000088256(GNA11)|ENSG00000170345(FOS)|ENSG00000162337(LRP5)|ENSG00000186350(RXRA)|ENSG00000137486(ARRB1)|ENSG00000102996(MMP15)|ENSG00000107175(CREB3)|ENSG00000075651(PLD1)|ENSG00000155897(ADCY8)|ENSG00000124762(CDKN1A)|ENSG00000157227(MMP14)|ENSG00000111012(CYP27B1)|ENSG00000149782(PLCB3)|ENSG00000146535(GNA12)|ENSG00000127412(TRPV5)|ENSG000001114…	hsa:9365|hsa:9586|hsa:2767|hsa:2353|hsa:4041|hsa:6256|hsa:408|hsa:4324|hsa:10488|hsa:5337|hsa:114|hsa:1026|hsa:4323|hsa:1594|hsa:5331|hsa:2768|hsa:56302|hsa:7421|hsa:1839|hsa:5744|hsa:1958|hsa:5338|hsa:6446|hsa:109	http://www.kegg.jp/kegg-bin/show_pathway?hsa04928+hsa:9365+hsa:9586+hsa:2767+hsa:2353+hsa:4041+hsa:6256+hsa:408+hsa:4324+hsa:10488+hsa:5337+hsa:114+hsa:1026+hsa:4323+hsa:1594+hsa:5331+hsa:2768+hsa:56302+hsa:7421+hsa:1839+hsa:5744+hsa:1958+hsa:5338+hsa:6446+hsa:109
hsa05200	Pathways in cancer	101	1431	514	7681	0.286666	0.774425	0.196498	ENSG00000133101(CCNA1)|ENSG00000136160(EDNRB)|ENSG00000134871(COL4A2)|ENSG00000185291(IL3RA)|ENSG00000101384(JAG1)|ENSG00000100368(CSF2RB)|ENSG00000159216(RUNX1)|ENSG00000122025(FLT3)|ENSG00000134470(IL15RA)|ENSG00000101680(LAMA1)|ENSG00000100311(PDGFB)|ENSG00000088256(GNA11)|ENSG00000170345(FOS)|ENSG00000008394(MGST1)|ENSG00000015475(BID)|ENSG00000167034(NKX3-1)|ENSG00000130222(GADD45G)|ENSG0000…	hsa:8900|hsa:1910|hsa:1284|hsa:3563|hsa:182|hsa:1439|hsa:861|hsa:2322|hsa:3601|hsa:284217|hsa:5155|hsa:2767|hsa:2353|hsa:4257|hsa:637|hsa:4824|hsa:10912|hsa:3909|hsa:1147|hsa:3597|hsa:9446|hsa:1612|hsa:54205|hsa:3162|hsa:6934|hsa:4041|hsa:595|hsa:4313|hsa:1050|hsa:3082|hsa:653689|hsa:6256|hsa:2277|hsa:3574|hsa:1488|hsa:5228|hsa:8322|hsa:3066|hsa:1728|hsa:3576|hsa:51684|hsa:2034|hsa:55970|hsa:2787…	http://www.kegg.jp/kegg-bin/show_pathway?hsa05200+hsa:8900+hsa:1910+hsa:1284+hsa:3563+hsa:182+hsa:1439+hsa:861+hsa:2322+hsa:3601+hsa:284217+hsa:5155+hsa:2767+hsa:2353+hsa:4257+hsa:637+hsa:4824+hsa:10912+hsa:3909+hsa:1147+hsa:3597+hsa:9446+hsa:1612+hsa:54205+hsa:3162+hsa:6934+hsa:4041+hsa:595+hsa:4313+hsa:1050+hsa:3082+hsa:653689+hsa:6256+hsa:2277+hsa:3574+hsa:1488+hsa:5228+hsa:8322+hsa:3066+hsa:1…
hsa04625	C-type lectin receptor signaling pathway	22	1431	104	7681	0.288845	0.774533	0.211538	ENSG00000166523(CLEC4E)|ENSG00000166527(CLEC4D)|ENSG00000172458(IL17D)|ENSG00000205846(CLEC6A)|ENSG00000213341(CHUK)|ENSG00000165025(SYK)|ENSG00000102970(CCL17)|ENSG00000102962(CCL22)|ENSG00000158186(MRAS)|ENSG00000103490(PYCARD)|ENSG00000187796(CARD9)|ENSG00000149269(PAK1)|ENSG00000126458(RRAS)|ENSG00000090659(CD209)|ENSG00000122877(EGR2)|ENSG00000115415(STAT1)|ENSG00000137752(CASP1)|ENSG0000015…	hsa:26253|hsa:338339|hsa:53342|hsa:93978|hsa:1147|hsa:6850|hsa:6361|hsa:6367|hsa:22808|hsa:29108|hsa:64170|hsa:5058|hsa:6237|hsa:30835|hsa:1959|hsa:6772|hsa:834|hsa:2207|hsa:8915|hsa:4193|hsa:3586|hsa:3725	http://www.kegg.jp/kegg-bin/show_pathway?hsa04625+hsa:26253+hsa:338339+hsa:53342+hsa:93978+hsa:1147+hsa:6850+hsa:6361+hsa:6367+hsa:22808+hsa:29108+hsa:64170+hsa:5058+hsa:6237+hsa:30835+hsa:1959+hsa:6772+hsa:834+hsa:2207+hsa:8915+hsa:4193+hsa:3586+hsa:3725
hsa00510	N-Glycan biosynthesis	12	1431	54	7681	0.297541	0.780506	0.222222	ENSG00000169084(DHRSX)|ENSG00000129562(DAD1)|ENSG00000139133(ALG10)|ENSG00000198856(OSTC)|ENSG00000172339(ALG14)|ENSG00000136908(DPM2)|ENSG00000134825(TMEM258)|ENSG00000167130(DOLPP1)|ENSG00000175283(DOLK)|ENSG00000131446(MGAT1)|ENSG00000159063(ALG8)|ENSG00000179085(DPM3)	hsa:207063|hsa:1603|hsa:84920|hsa:58505|hsa:199857|hsa:8818|hsa:746|hsa:57171|hsa:22845|hsa:4245|hsa:79053|hsa:54344	http://www.kegg.jp/kegg-bin/show_pathway?hsa00510+hsa:207063+hsa:1603+hsa:84920+hsa:58505+hsa:199857+hsa:8818+hsa:746+hsa:57171+hsa:22845+hsa:4245+hsa:79053+hsa:54344
hsa05030	Cocaine addiction	10	1431	44	7681	0.296234	0.780506	0.227273	ENSG00000101327(PDYN)|ENSG00000146592(CREB5)|ENSG00000036565(SLC18A1)|ENSG00000198785(GRIN3A)|ENSG00000189221(MAOA)|ENSG00000107175(CREB3)|ENSG00000125740(FOSB)|ENSG00000164885(CDK5)|ENSG00000105464(GRIN2D)|ENSG00000177606(JUN)	hsa:5173|hsa:9586|hsa:6570|hsa:116443|hsa:4128|hsa:10488|hsa:2354|hsa:1020|hsa:2906|hsa:3725	http://www.kegg.jp/kegg-bin/show_pathway?hsa05030+hsa:5173+hsa:9586+hsa:6570+hsa:116443+hsa:4128+hsa:10488+hsa:2354+hsa:1020+hsa:2906+hsa:3725
hsa05168	Herpes simplex virus 1 infection	35	1431	171	7681	0.294942	0.780506	0.204678	ENSG00000147206(NXF3)|ENSG00000206503(HLA-A)|ENSG00000015475(BID)|ENSG00000187840(EIF4EBP1)|ENSG00000213341(CHUK)|ENSG00000108691(CCL2)|ENSG00000172115(CYCS)|ENSG00000165025(SYK)|ENSG00000110400(NECTIN1)|ENSG00000096968(JAK2)|ENSG00000106615(RHEB)|ENSG00000187796(CARD9)|ENSG00000085514(PILRA)|ENSG00000111537(IFNG)|ENSG00000125730(C3)|ENSG00000125735(TNFSF14)|ENSG00000204642(HLA-F)|ENSG00000087088…	hsa:56000|hsa:3105|hsa:637|hsa:1978|hsa:1147|hsa:6347|hsa:54205|hsa:6850|hsa:5818|hsa:3717|hsa:6009|hsa:64170|hsa:29992|hsa:3458|hsa:718|hsa:8740|hsa:3134|hsa:581|hsa:3109|hsa:3108|hsa:3117|hsa:3118|hsa:3120|hsa:567|hsa:3122|hsa:684|hsa:972|hsa:3135|hsa:3111|hsa:3113|hsa:3115|hsa:5819|hsa:6772|hsa:8891|hsa:8764	http://www.kegg.jp/kegg-bin/show_pathway?hsa05168+hsa:56000+hsa:3105+hsa:637+hsa:1978+hsa:1147+hsa:6347+hsa:54205+hsa:6850+hsa:5818+hsa:3717+hsa:6009+hsa:64170+hsa:29992+hsa:3458+hsa:718+hsa:8740+hsa:3134+hsa:581+hsa:3109+hsa:3108+hsa:3117+hsa:3118+hsa:3120+hsa:567+hsa:3122+hsa:684+hsa:972+hsa:3135+hsa:3111+hsa:3113+hsa:3115+hsa:5819+hsa:6772+hsa:8891+hsa:8764
hsa00470	D-Amino acid metabolism	2	1431	6	7681	0.311003	0.804165	0.333333	ENSG00000203797(DDO)|ENSG00000167720(SRR)	hsa:8528|hsa:63826	http://www.kegg.jp/kegg-bin/show_pathway?hsa00470+hsa:8528+hsa:63826
hsa03264	Virion - Flavivirus and Alphavirus	2	1431	6	7681	0.311003	0.804165	0.333333	ENSG00000090659(CD209)|ENSG00000167085(PHB)	hsa:30835|hsa:5245	http://www.kegg.jp/kegg-bin/show_pathway?hsa03264+hsa:30835+hsa:5245
hsa00830	Retinol metabolism	12	1431	55	7681	0.321241	0.824745	0.218182	ENSG00000165092(ALDH1A1)|ENSG00000140465(CYP1A1)|ENSG00000157326(DHRS4)|ENSG00000121039(RDH10)|ENSG00000042445(RETSAT)|ENSG00000185000(DGAT1)|ENSG00000106258(CYP3A5)|ENSG00000160870(CYP3A7)|ENSG00000167600(CYP2S1)|ENSG00000138356(AOX1)|ENSG00000025423(HSD17B6)|ENSG00000073737(DHRS9)	hsa:216|hsa:1543|hsa:10901|hsa:157506|hsa:54884|hsa:8694|hsa:1577|hsa:1551|hsa:29785|hsa:316|hsa:8630|hsa:10170	http://www.kegg.jp/kegg-bin/show_pathway?hsa00830+hsa:216+hsa:1543+hsa:10901+hsa:157506+hsa:54884+hsa:8694+hsa:1577+hsa:1551+hsa:29785+hsa:316+hsa:8630+hsa:10170
hsa04666	Fc gamma R-mediated phagocytosis	20	1431	96	7681	0.327181	0.834082	0.208333	ENSG00000141934(PLPP2)|ENSG00000165025(SYK)|ENSG00000241685(ARPC1A)|ENSG00000162407(PLPP3)|ENSG00000101336(HCK)|ENSG00000105499(PLA2G4C)|ENSG00000075651(PLD1)|ENSG00000115091(ACTR3)|ENSG00000149269(PAK1)|ENSG00000148180(GSN)|ENSG00000150760(DOCK1)|ENSG00000106683(LIMK1)|ENSG00000162704(ARPC5)|ENSG00000116711(PLA2G4A)|ENSG00000176170(SPHK1)|ENSG00000158517(NCF1)|ENSG00000129219(PLD2)|ENSG000000726…	hsa:8612|hsa:6850|hsa:10552|hsa:8613|hsa:3055|hsa:8605|hsa:5337|hsa:10096|hsa:5058|hsa:2934|hsa:1793|hsa:3984|hsa:10092|hsa:5321|hsa:8877|hsa:653361|hsa:5338|hsa:2213|hsa:2212|hsa:2209	http://www.kegg.jp/kegg-bin/show_pathway?hsa04666+hsa:8612+hsa:6850+hsa:10552+hsa:8613+hsa:3055+hsa:8605+hsa:5337+hsa:10096+hsa:5058+hsa:2934+hsa:1793+hsa:3984+hsa:10092+hsa:5321+hsa:8877+hsa:653361+hsa:5338+hsa:2213+hsa:2212+hsa:2209
hsa00430	Taurine and hypotaurine metabolism	4	1431	16	7681	0.347162	0.851996	0.25	ENSG00000181915(ADO)|ENSG00000076258(FMO4)|ENSG00000010932(FMO1)|ENSG00000128683(GAD1)	hsa:84890|hsa:2329|hsa:2326|hsa:2571	http://www.kegg.jp/kegg-bin/show_pathway?hsa00430+hsa:84890+hsa:2329+hsa:2326+hsa:2571
hsa00604	Glycosphingolipid biosynthesis - ganglio series	4	1431	16	7681	0.347162	0.851996	0.25	ENSG00000170266(GLB1)|ENSG00000049860(HEXB)|ENSG00000135454(B4GALNT1)|ENSG00000213614(HEXA)	hsa:2720|hsa:3074|hsa:2583|hsa:3073	http://www.kegg.jp/kegg-bin/show_pathway?hsa00604+hsa:2720+hsa:3074+hsa:2583+hsa:3073
hsa00670	One carbon pool by folate	8	1431	36	7681	0.352264	0.851996	0.222222	ENSG00000274276(CBSL)|ENSG00000160200(CBS)|ENSG00000136010(ALDH1L2)|ENSG00000168710(AHCYL1)|ENSG00000164904(ALDH7A1)|ENSG00000136371(MTHFS)|ENSG00000016391(CHDH)|ENSG00000065911(MTHFD2)	hsa:102724560|hsa:875|hsa:160428|hsa:10768|hsa:501|hsa:10588|hsa:55349|hsa:10797	http://www.kegg.jp/kegg-bin/show_pathway?hsa00670+hsa:102724560+hsa:875+hsa:160428+hsa:10768+hsa:501+hsa:10588+hsa:55349+hsa:10797
hsa01210	2-Oxocarboxylic acid metabolism	7	1431	31	7681	0.353037	0.851996	0.225806	ENSG00000131828(PDHA1)|ENSG00000060982(BCAT1)|ENSG00000120053(GOT1)|ENSG00000122729(ACO1)|ENSG00000150768(DLAT)|ENSG00000161653(NAGS)|ENSG00000138413(IDH1)	hsa:5160|hsa:586|hsa:2805|hsa:48|hsa:1737|hsa:162417|hsa:3417	http://www.kegg.jp/kegg-bin/show_pathway?hsa01210+hsa:5160+hsa:586+hsa:2805+hsa:48+hsa:1737+hsa:162417+hsa:3417
hsa01320	Sulfur cycle	1	1431	2	7681	0.337918	0.851996	0.5	ENSG00000138801(PAPSS1)	hsa:9061	http://www.kegg.jp/kegg-bin/show_pathway?hsa01320+hsa:9061
hsa04136	Autophagy - other	7	1431	31	7681	0.353037	0.851996	0.225806	ENSG00000101844(ATG4A)|ENSG00000125703(ATG4C)|ENSG00000057663(ATG5)|ENSG00000104695(PPP2CB)|ENSG00000070540(WIPI1)|ENSG00000123395(ATG101)|ENSG00000170296(GABARAP)	hsa:115201|hsa:84938|hsa:9474|hsa:5516|hsa:55062|hsa:60673|hsa:11337	http://www.kegg.jp/kegg-bin/show_pathway?hsa04136+hsa:115201+hsa:84938+hsa:9474+hsa:5516+hsa:55062+hsa:60673+hsa:11337
hsa04974	Protein digestion and absorption	20	1431	97	7681	0.345449	0.851996	0.206186	ENSG00000134871(COL4A2)|ENSG00000204291(COL15A1)|ENSG00000137731(FXYD2)|ENSG00000104783(KCNN4)|ENSG00000183023(SLC8A1)|ENSG00000105281(SLC1A5)|ENSG00000069849(ATP1B3)|ENSG00000169436(COL22A1)|ENSG00000155465(SLC7A7)|ENSG00000186335(SLC36A2)|ENSG00000129244(ATP1B2)|ENSG00000112818(MEP1A)|ENSG00000186334(SLC36A3)|ENSG00000143153(ATP1B1)|ENSG00000175538(KCNE3)|ENSG00000180773(SLC36A4)|ENSG0000013750…	hsa:1284|hsa:1306|hsa:486|hsa:3783|hsa:6546|hsa:6510|hsa:483|hsa:169044|hsa:9056|hsa:153201|hsa:482|hsa:4224|hsa:285641|hsa:481|hsa:10008|hsa:120103|hsa:5547|hsa:6520|hsa:1298|hsa:1296	http://www.kegg.jp/kegg-bin/show_pathway?hsa04974+hsa:1284+hsa:1306+hsa:486+hsa:3783+hsa:6546+hsa:6510+hsa:483+hsa:169044+hsa:9056+hsa:153201+hsa:482+hsa:4224+hsa:285641+hsa:481+hsa:10008+hsa:120103+hsa:5547+hsa:6520+hsa:1298+hsa:1296
hsa05166	Human T-cell leukemia virus 1 infection	44	1431	222	7681	0.348596	0.851996	0.198198	ENSG00000133101(CCNA1)|ENSG00000157557(ETS2)|ENSG00000134470(IL15RA)|ENSG00000100300(TSPO)|ENSG00000099250(NRP1)|ENSG00000146592(CREB5)|ENSG00000005022(SLC25A5)|ENSG00000206503(HLA-A)|ENSG00000170345(FOS)|ENSG00000183765(CHEK2)|ENSG00000213341(CHUK)|ENSG00000110092(CCND1)|ENSG00000164400(CSF2)|ENSG00000101017(CD40)|ENSG00000107175(CREB3)|ENSG00000213585(VDAC1)|ENSG00000155897(ADCY8)|ENSG000001247…	hsa:8900|hsa:2114|hsa:3601|hsa:706|hsa:8829|hsa:9586|hsa:292|hsa:3105|hsa:2353|hsa:11200|hsa:1147|hsa:595|hsa:1437|hsa:958|hsa:10488|hsa:7416|hsa:114|hsa:1026|hsa:3600|hsa:3134|hsa:55697|hsa:10393|hsa:581|hsa:1019|hsa:8061|hsa:3109|hsa:3108|hsa:3117|hsa:3118|hsa:3120|hsa:1959|hsa:567|hsa:4055|hsa:3122|hsa:821|hsa:1958|hsa:3135|hsa:25847|hsa:3111|hsa:3113|hsa:3115|hsa:51529|hsa:3725|hsa:109	http://www.kegg.jp/kegg-bin/show_pathway?hsa05166+hsa:8900+hsa:2114+hsa:3601+hsa:706+hsa:8829+hsa:9586+hsa:292+hsa:3105+hsa:2353+hsa:11200+hsa:1147+hsa:595+hsa:1437+hsa:958+hsa:10488+hsa:7416+hsa:114+hsa:1026+hsa:3600+hsa:3134+hsa:55697+hsa:10393+hsa:581+hsa:1019+hsa:8061+hsa:3109+hsa:3108+hsa:3117+hsa:3118+hsa:3120+hsa:1959+hsa:567+hsa:4055+hsa:3122+hsa:821+hsa:1958+hsa:3135+hsa:25847+hsa:3111+h…
hsa04976	Bile secretion	16	1431	77	7681	0.357165	0.85625	0.207792	ENSG00000090020(SLC9A1)|ENSG00000186350(RXRA)|ENSG00000137731(FXYD2)|ENSG00000104267(CA2)|ENSG00000167910(CYP7A1)|ENSG00000108846(ABCC3)|ENSG00000155897(ADCY8)|ENSG00000069849(ATP1B3)|ENSG00000144959(NCEH1)|ENSG00000129244(ATP1B2)|ENSG00000186198(SLC51B)|ENSG00000143153(ATP1B1)|ENSG00000118777(ABCG2)|ENSG00000073060(SCARB1)|ENSG00000138031(ADCY3)|ENSG00000138075(ABCG5)	hsa:6548|hsa:6256|hsa:486|hsa:760|hsa:1581|hsa:8714|hsa:114|hsa:483|hsa:57552|hsa:482|hsa:123264|hsa:481|hsa:9429|hsa:949|hsa:109|hsa:64240	http://www.kegg.jp/kegg-bin/show_pathway?hsa04976+hsa:6548+hsa:6256+hsa:486+hsa:760+hsa:1581+hsa:8714+hsa:114+hsa:483+hsa:57552+hsa:482+hsa:123264+hsa:481+hsa:9429+hsa:949+hsa:109+hsa:64240
hsa04918	Thyroid hormone synthesis	15	1431	72	7681	0.360234	0.857926	0.208333	ENSG00000146592(CREB5)|ENSG00000137731(FXYD2)|ENSG00000107175(CREB3)|ENSG00000155897(ADCY8)|ENSG00000069849(ATP1B3)|ENSG00000211445(GPX3)|ENSG00000104687(GSR)|ENSG00000129244(ATP1B2)|ENSG00000149782(PLCB3)|ENSG00000143153(ATP1B1)|ENSG00000127022(CANX)|ENSG00000233276(GPX1)|ENSG00000141505(ASGR1)|ENSG00000138031(ADCY3)|ENSG00000125618(PAX8)	hsa:9586|hsa:486|hsa:10488|hsa:114|hsa:483|hsa:2878|hsa:2936|hsa:482|hsa:5331|hsa:481|hsa:821|hsa:2876|hsa:432|hsa:109|hsa:7849	http://www.kegg.jp/kegg-bin/show_pathway?hsa04918+hsa:9586+hsa:486+hsa:10488+hsa:114+hsa:483+hsa:2878+hsa:2936+hsa:482+hsa:5331+hsa:481+hsa:821+hsa:2876+hsa:432+hsa:109+hsa:7849
hsa04072	Phospholipase D signaling pathway	29	1431	145	7681	0.36721	0.868823	0.2	ENSG00000100311(PDGFB)|ENSG00000141934(PLPP2)|ENSG00000171105(INSR)|ENSG00000165025(SYK)|ENSG00000162407(PLPP3)|ENSG00000169429(CXCL8)|ENSG00000105499(PLA2G4C)|ENSG00000158186(MRAS)|ENSG00000134853(PDGFRA)|ENSG00000106615(RHEB)|ENSG00000075651(PLD1)|ENSG00000155897(ADCY8)|ENSG00000169692(AGPAT2)|ENSG00000180871(CXCR2)|ENSG00000006451(RALA)|ENSG00000058866(DGKG)|ENSG00000147145(LPAR4)|ENSG00000144…	hsa:5155|hsa:8612|hsa:3643|hsa:6850|hsa:8613|hsa:3576|hsa:8605|hsa:22808|hsa:5156|hsa:6009|hsa:5337|hsa:114|hsa:10555|hsa:3579|hsa:5898|hsa:1608|hsa:2846|hsa:5899|hsa:6237|hsa:5331|hsa:2768|hsa:1902|hsa:146850|hsa:5321|hsa:8877|hsa:9162|hsa:5338|hsa:2207|hsa:109	http://www.kegg.jp/kegg-bin/show_pathway?hsa04072+hsa:5155+hsa:8612+hsa:3643+hsa:6850+hsa:8613+hsa:3576+hsa:8605+hsa:22808+hsa:5156+hsa:6009+hsa:5337+hsa:114+hsa:10555+hsa:3579+hsa:5898+hsa:1608+hsa:2846+hsa:5899+hsa:6237+hsa:5331+hsa:2768+hsa:1902+hsa:146850+hsa:5321+hsa:8877+hsa:9162+hsa:5338+hsa:2207+hsa:109
hsa05216	Thyroid cancer	8	1431	37	7681	0.383004	0.900307	0.216216	ENSG00000130222(GADD45G)|ENSG00000148737(TCF7L2)|ENSG00000110092(CCND1)|ENSG00000186350(RXRA)|ENSG00000124762(CDKN1A)|ENSG00000087088(BAX)|ENSG00000132170(PPARG)|ENSG00000125618(PAX8)	hsa:10912|hsa:6934|hsa:595|hsa:6256|hsa:1026|hsa:581|hsa:5468|hsa:7849	http://www.kegg.jp/kegg-bin/show_pathway?hsa05216+hsa:10912+hsa:6934+hsa:595+hsa:6256+hsa:1026+hsa:581+hsa:5468+hsa:7849
hsa05211	Renal cell carcinoma	14	1431	68	7681	0.385963	0.901411	0.205882	ENSG00000100311(PDGFB)|ENSG00000019991(HGF)|ENSG00000116016(EPAS1)|ENSG00000172379(ARNT2)|ENSG00000163235(TGFA)|ENSG00000124762(CDKN1A)|ENSG00000149269(PAK1)|ENSG00000154582(ELOC)|ENSG00000105976(MET)|ENSG00000112715(VEGFA)|ENSG00000154803(FLCN)|ENSG00000103363(ELOB)|ENSG00000177606(JUN)|ENSG00000091483(FH)	hsa:5155|hsa:3082|hsa:2034|hsa:9915|hsa:7039|hsa:1026|hsa:5058|hsa:6921|hsa:4233|hsa:7422|hsa:201163|hsa:6923|hsa:3725|hsa:2271	http://www.kegg.jp/kegg-bin/show_pathway?hsa05211+hsa:5155+hsa:3082+hsa:2034+hsa:9915+hsa:7039+hsa:1026+hsa:5058+hsa:6921+hsa:4233+hsa:7422+hsa:201163+hsa:6923+hsa:3725+hsa:2271
hsa04662	B cell receptor signaling pathway	17	1431	84	7681	0.394865	0.91629	0.202381	ENSG00000170345(FOS)|ENSG00000155629(PIK3AP1)|ENSG00000213341(CHUK)|ENSG00000165025(SYK)|ENSG00000010671(BTK)|ENSG00000239998(LILRA2)|ENSG00000186818(LILRB4)|ENSG00000110651(CD81)|ENSG00000111679(PTPN6)|ENSG00000105609(LILRB5)|ENSG00000204577(LILRB3)|ENSG00000204577(LILRB3)|ENSG00000204577(LILRB3)|ENSG00000204577(LILRB3)|ENSG00000142867(BCL10)|ENSG00000072694(FCGR2B)|ENSG00000177606(JUN)	hsa:2353|hsa:118788|hsa:1147|hsa:6850|hsa:695|hsa:11027|hsa:11006|hsa:975|hsa:5777|hsa:10990|hsa:11025|hsa:102725035|hsa:107987425|hsa:107987462|hsa:8915|hsa:2213|hsa:3725	http://www.kegg.jp/kegg-bin/show_pathway?hsa04662+hsa:2353+hsa:118788+hsa:1147+hsa:6850+hsa:695+hsa:11027+hsa:11006+hsa:975+hsa:5777+hsa:10990+hsa:11025+hsa:102725035+hsa:107987425+hsa:107987462+hsa:8915+hsa:2213+hsa:3725
hsa05146	Amoebiasis	20	1431	100	7681	0.401413	0.925551	0.2	ENSG00000134871(COL4A2)|ENSG00000101680(LAMA1)|ENSG00000088256(GNA11)|ENSG00000053747(LAMA3)|ENSG00000163739(CXCL1)|ENSG00000136869(TLR4)|ENSG00000164400(CSF2)|ENSG00000169429(CXCL8)|ENSG00000111537(IFNG)|ENSG00000169896(ITGAM)|ENSG00000106211(HSPB1)|ENSG00000135862(LAMC1)|ENSG00000158473(CD1D)|ENSG00000075785(RAB7A)|ENSG00000149782(PLCB3)|ENSG00000170458(CD14)|ENSG00000172037(LAMB2)|ENSG00000136…	hsa:1284|hsa:284217|hsa:2767|hsa:3909|hsa:2919|hsa:7099|hsa:1437|hsa:3576|hsa:3458|hsa:3684|hsa:3315|hsa:3915|hsa:912|hsa:7879|hsa:5331|hsa:929|hsa:3913|hsa:3586|hsa:338382|hsa:5052	http://www.kegg.jp/kegg-bin/show_pathway?hsa05146+hsa:1284+hsa:284217+hsa:2767+hsa:3909+hsa:2919+hsa:7099+hsa:1437+hsa:3576+hsa:3458+hsa:3684+hsa:3315+hsa:3915+hsa:912+hsa:7879+hsa:5331+hsa:929+hsa:3913+hsa:3586+hsa:338382+hsa:5052
hsa05031	Amphetamine addiction	13	1431	64	7681	0.413782	0.948031	0.203125	ENSG00000101327(PDYN)|ENSG00000146592(CREB5)|ENSG00000170345(FOS)|ENSG00000036565(SLC18A1)|ENSG00000198785(GRIN3A)|ENSG00000189221(MAOA)|ENSG00000196591(HDAC2)|ENSG00000107175(CREB3)|ENSG00000125740(FOSB)|ENSG00000198576(ARC)|ENSG00000105464(GRIN2D)|ENSG00000157388(CACNA1D)|ENSG00000177606(JUN)	hsa:5173|hsa:9586|hsa:2353|hsa:6570|hsa:116443|hsa:4128|hsa:3066|hsa:10488|hsa:2354|hsa:23237|hsa:2906|hsa:776|hsa:3725	http://www.kegg.jp/kegg-bin/show_pathway?hsa05031+hsa:5173+hsa:9586+hsa:2353+hsa:6570+hsa:116443+hsa:4128+hsa:3066+hsa:10488+hsa:2354+hsa:23237+hsa:2906+hsa:776+hsa:3725
hsa00500	Starch and sucrose metabolism	7	1431	33	7681	0.419467	0.949044	0.212121	ENSG00000114480(GBE1)|ENSG00000100504(PYGL)|ENSG00000159399(HK2)|ENSG00000160883(HK3)|ENSG00000171298(GAA)|ENSG00000163754(GYG1)|ENSG00000141349(G6PC3)	hsa:2632|hsa:5836|hsa:3099|hsa:3101|hsa:2548|hsa:2992|hsa:92579	http://www.kegg.jp/kegg-bin/show_pathway?hsa00500+hsa:2632+hsa:5836+hsa:3099+hsa:3101+hsa:2548+hsa:2992+hsa:92579
hsa00590	Arachidonic acid metabolism	12	1431	59	7681	0.419142	0.949044	0.20339	ENSG00000159228(CBR1)|ENSG00000012779(ALOX5)|ENSG00000167468(GPX4)|ENSG00000148344(PTGES)|ENSG00000105499(PLA2G4C)|ENSG00000111144(LTA4H)|ENSG00000059377(TBXAS1)|ENSG00000106853(PTGR1)|ENSG00000179593(ALOX15B)|ENSG00000116711(PLA2G4A)|ENSG00000176485(PLAAT3)|ENSG00000157870(PRXL2B)	hsa:873|hsa:240|hsa:2879|hsa:9536|hsa:8605|hsa:4048|hsa:6916|hsa:22949|hsa:247|hsa:5321|hsa:11145|hsa:127281	http://www.kegg.jp/kegg-bin/show_pathway?hsa00590+hsa:873+hsa:240+hsa:2879+hsa:9536+hsa:8605+hsa:4048+hsa:6916+hsa:22949+hsa:247+hsa:5321+hsa:11145+hsa:127281
hsa05167	Kaposi sarcoma-associated herpesvirus infection	36	1431	186	7681	0.428579	0.963638	0.193548	ENSG00000100311(PDGFB)|ENSG00000206503(HLA-A)|ENSG00000159200(RCAN1)|ENSG00000170345(FOS)|ENSG00000015475(BID)|ENSG00000213341(CHUK)|ENSG00000172115(CYCS)|ENSG00000148737(TCF7L2)|ENSG00000110092(CCND1)|ENSG00000165025(SYK)|ENSG00000163739(CXCL1)|ENSG00000140941(MAP1LC3B)|ENSG00000164400(CSF2)|ENSG00000101336(HCK)|ENSG00000169429(CXCL8)|ENSG00000172380(GNG12)|ENSG00000258102(MAP1LC3B2)|ENSG0000017…	hsa:5155|hsa:3105|hsa:1827|hsa:2353|hsa:637|hsa:1147|hsa:54205|hsa:6934|hsa:595|hsa:6850|hsa:2919|hsa:81631|hsa:1437|hsa:3055|hsa:3576|hsa:55970|hsa:643246|hsa:2787|hsa:942|hsa:3717|hsa:1026|hsa:718|hsa:3134|hsa:581|hsa:1019|hsa:7422|hsa:2790|hsa:59345|hsa:146850|hsa:3135|hsa:6772|hsa:7316|hsa:1230|hsa:1234|hsa:3725|hsa:440738	http://www.kegg.jp/kegg-bin/show_pathway?hsa05167+hsa:5155+hsa:3105+hsa:1827+hsa:2353+hsa:637+hsa:1147+hsa:54205+hsa:6934+hsa:595+hsa:6850+hsa:2919+hsa:81631+hsa:1437+hsa:3055+hsa:3576+hsa:55970+hsa:643246+hsa:2787+hsa:942+hsa:3717+hsa:1026+hsa:718+hsa:3134+hsa:581+hsa:1019+hsa:7422+hsa:2790+hsa:59345+hsa:146850+hsa:3135+hsa:6772+hsa:7316+hsa:1230+hsa:1234+hsa:3725+hsa:440738
hsa04614	Renin-angiotensin system	5	1431	23	7681	0.43203	0.9654	0.217391	ENSG00000182220(ATP6AP2)|ENSG00000064601(CTSA)|ENSG00000167751(KLK2)|ENSG00000138792(ENPEP)|ENSG00000137509(PRCP)	hsa:10159|hsa:5476|hsa:3817|hsa:2028|hsa:5547	http://www.kegg.jp/kegg-bin/show_pathway?hsa04614+hsa:10159+hsa:5476+hsa:3817+hsa:2028+hsa:5547
hsa05132	Salmonella infection	47	1431	245	7681	0.436977	0.970464	0.191837	ENSG00000100348(TXN2)|ENSG00000165169(DYNLT3)|ENSG00000144635(DYNC1LI1)|ENSG00000170345(FOS)|ENSG00000176014(TUBB6)|ENSG00000273749(CYFIP1)|ENSG00000213341(CHUK)|ENSG00000136810(TXN)|ENSG00000215375(MYL5)|ENSG00000172115(CYCS)|ENSG00000006715(VPS41)|ENSG00000148737(TCF7L2)|ENSG00000241685(ARPC1A)|ENSG00000131966(ACTR10)|ENSG00000174130(TLR6)|ENSG00000180209(MYLPF)|ENSG00000154589(LY96)|ENSG000001…	hsa:25828|hsa:6990|hsa:51143|hsa:2353|hsa:84617|hsa:23191|hsa:1147|hsa:7295|hsa:4636|hsa:54205|hsa:27072|hsa:6934|hsa:10552|hsa:55860|hsa:10333|hsa:29895|hsa:23643|hsa:26263|hsa:7099|hsa:8767|hsa:3576|hsa:29108|hsa:112574|hsa:9367|hsa:10096|hsa:5058|hsa:5898|hsa:257364|hsa:581|hsa:4074|hsa:8655|hsa:6237|hsa:302|hsa:7879|hsa:10092|hsa:83547|hsa:929|hsa:55207|hsa:8677|hsa:834|hsa:84790|hsa:58484|hs…	http://www.kegg.jp/kegg-bin/show_pathway?hsa05132+hsa:25828+hsa:6990+hsa:51143+hsa:2353+hsa:84617+hsa:23191+hsa:1147+hsa:7295+hsa:4636+hsa:54205+hsa:27072+hsa:6934+hsa:10552+hsa:55860+hsa:10333+hsa:29895+hsa:23643+hsa:26263+hsa:7099+hsa:8767+hsa:3576+hsa:29108+hsa:112574+hsa:9367+hsa:10096+hsa:5058+hsa:5898+hsa:257364+hsa:581+hsa:4074+hsa:8655+hsa:6237+hsa:302+hsa:7879+hsa:10092+hsa:83547+hsa:929…
hsa04152	AMPK signaling pathway	23	1431	118	7681	0.441659	0.974881	0.194915	ENSG00000133101(CCNA1)|ENSG00000102547(CAB39L)|ENSG00000185950(IRS2)|ENSG00000146592(CREB5)|ENSG00000171105(INSR)|ENSG00000187840(EIF4EBP1)|ENSG00000099194(SCD)|ENSG00000110092(CCND1)|ENSG00000107175(CREB3)|ENSG00000106615(RHEB)|ENSG00000100889(PCK2)|ENSG00000006831(ADIPOR2)|ENSG00000204673(AKT1S1)|ENSG00000110090(CPT1A)|ENSG00000104695(PPP2CB)|ENSG00000165140(FBP1)|ENSG00000123836(PFKFB2)|ENSG00…	hsa:8900|hsa:81617|hsa:8660|hsa:9586|hsa:3643|hsa:1978|hsa:6319|hsa:595|hsa:10488|hsa:6009|hsa:5106|hsa:79602|hsa:84335|hsa:1374|hsa:5516|hsa:2203|hsa:5208|hsa:5210|hsa:92579|hsa:5468|hsa:53632|hsa:55437|hsa:10890	http://www.kegg.jp/kegg-bin/show_pathway?hsa04152+hsa:8900+hsa:81617+hsa:8660+hsa:9586+hsa:3643+hsa:1978+hsa:6319+hsa:595+hsa:10488+hsa:6009+hsa:5106+hsa:79602+hsa:84335+hsa:1374+hsa:5516+hsa:2203+hsa:5208+hsa:5210+hsa:92579+hsa:5468+hsa:53632+hsa:55437+hsa:10890
hsa00230	Purine metabolism	24	1431	124	7681	0.453835	0.984061	0.193548	ENSG00000179630(LACC1)|ENSG00000165609(NUDT5)|ENSG00000139053(PDE6H)|ENSG00000001561(ENPP4)|ENSG00000170502(NUDT9)|ENSG00000101911(PRPS2)|ENSG00000138801(PAPSS1)|ENSG00000048392(RRM2B)|ENSG00000162433(AK4)|ENSG00000155897(ADCY8)|ENSG00000100938(GMPR2)|ENSG00000185100(ADSS1)|ENSG00000101890(GUCY2F)|ENSG00000184508(HDDC3)|ENSG00000133805(AMPD3)|ENSG00000144130(NT5DC4)|ENSG00000165695(AK8)|ENSG00000…	hsa:144811|hsa:11164|hsa:5149|hsa:22875|hsa:53343|hsa:5634|hsa:9061|hsa:50484|hsa:205|hsa:114|hsa:51292|hsa:122622|hsa:2986|hsa:374659|hsa:272|hsa:284958|hsa:158067|hsa:131870|hsa:318|hsa:3000|hsa:84284|hsa:102157402|hsa:204|hsa:109	http://www.kegg.jp/kegg-bin/show_pathway?hsa00230+hsa:144811+hsa:11164+hsa:5149+hsa:22875+hsa:53343+hsa:5634+hsa:9061+hsa:50484+hsa:205+hsa:114+hsa:51292+hsa:122622+hsa:2986+hsa:374659+hsa:272+hsa:284958+hsa:158067+hsa:131870+hsa:318+hsa:3000+hsa:84284+hsa:102157402+hsa:204+hsa:109
hsa01524	Platinum drug resistance	14	1431	71	7681	0.45431	0.984061	0.197183	ENSG00000008394(MGST1)|ENSG00000015475(BID)|ENSG00000148834(GSTO1)|ENSG00000172115(CYCS)|ENSG00000133433(GSTT2B)|ENSG00000124762(CDKN1A)|ENSG00000105327(BBC3)|ENSG00000087088(BAX)|ENSG00000134202(GSTM3)|ENSG00000143198(MGST3)|ENSG00000136868(SLC31A1)|ENSG00000085871(MGST2)|ENSG00000084207(GSTP1)|ENSG00000135679(MDM2)	hsa:4257|hsa:637|hsa:9446|hsa:54205|hsa:653689|hsa:1026|hsa:27113|hsa:581|hsa:2947|hsa:4259|hsa:1317|hsa:4258|hsa:2950|hsa:4193	http://www.kegg.jp/kegg-bin/show_pathway?hsa01524+hsa:4257+hsa:637+hsa:9446+hsa:54205+hsa:653689+hsa:1026+hsa:27113+hsa:581+hsa:2947+hsa:4259+hsa:1317+hsa:4258+hsa:2950+hsa:4193
hsa04122	Sulfur relay system	2	1431	8	7681	0.45588	0.984061	0.25	ENSG00000128309(MPST)|ENSG00000124217(MOCS3)	hsa:4357|hsa:27304	http://www.kegg.jp/kegg-bin/show_pathway?hsa04122+hsa:4357+hsa:27304
hsa05202	Transcriptional misregulation in cancer	36	1431	188	7681	0.456691	0.984061	0.191489	ENSG00000133101(CCNA1)|ENSG00000159216(RUNX1)|ENSG00000172216(CEBPB)|ENSG00000122025(FLT3)|ENSG00000130222(GADD45G)|ENSG00000245848(CEBPA)|ENSG00000186350(RXRA)|ENSG00000196591(HDAC2)|ENSG00000197561(ELANE)|ENSG00000164400(CSF2)|ENSG00000169429(CXCL8)|ENSG00000101017(CD40)|ENSG00000114013(CD86)|ENSG00000172379(ARNT2)|ENSG00000164399(IL3)|ENSG00000124762(CDKN1A)|ENSG00000169896(ITGAM)|ENSG00000087…	hsa:8900|hsa:861|hsa:1051|hsa:2322|hsa:10912|hsa:1050|hsa:6256|hsa:3066|hsa:1991|hsa:1437|hsa:3576|hsa:958|hsa:942|hsa:9915|hsa:3562|hsa:1026|hsa:3684|hsa:581|hsa:1053|hsa:8352|hsa:2119|hsa:4353|hsa:5327|hsa:4233|hsa:929|hsa:51513|hsa:26471|hsa:8354|hsa:6692|hsa:4286|hsa:5468|hsa:4314|hsa:1649|hsa:4193|hsa:7849|hsa:2209	http://www.kegg.jp/kegg-bin/show_pathway?hsa05202+hsa:8900+hsa:861+hsa:1051+hsa:2322+hsa:10912+hsa:1050+hsa:6256+hsa:3066+hsa:1991+hsa:1437+hsa:3576+hsa:958+hsa:942+hsa:9915+hsa:3562+hsa:1026+hsa:3684+hsa:581+hsa:1053+hsa:8352+hsa:2119+hsa:4353+hsa:5327+hsa:4233+hsa:929+hsa:51513+hsa:26471+hsa:8354+hsa:6692+hsa:4286+hsa:5468+hsa:4314+hsa:1649+hsa:4193+hsa:7849+hsa:2209
hsa04210	Apoptosis	26	1431	135	7681	0.460081	0.985498	0.192593	ENSG00000185291(IL3RA)|ENSG00000100368(CSF2RB)|ENSG00000170345(FOS)|ENSG00000015475(BID)|ENSG00000130222(GADD45G)|ENSG00000213341(CHUK)|ENSG00000172115(CYCS)|ENSG00000101160(CTSZ)|ENSG00000164399(IL3)|ENSG00000135047(CTSL)|ENSG00000105327(BBC3)|ENSG00000087088(BAX)|ENSG00000136943(CTSV)|ENSG00000164733(CTSB)|ENSG00000140939(NOL3)|ENSG00000103811(CTSH)|ENSG00000109861(CTSC)|ENSG00000117984(CTSD)|E…	hsa:3563|hsa:1439|hsa:2353|hsa:637|hsa:10912|hsa:1147|hsa:54205|hsa:1522|hsa:3562|hsa:1514|hsa:27113|hsa:581|hsa:1515|hsa:1508|hsa:8996|hsa:1512|hsa:1075|hsa:1509|hsa:10039|hsa:84790|hsa:1649|hsa:3725|hsa:5414|hsa:1513|hsa:1520|hsa:4000	http://www.kegg.jp/kegg-bin/show_pathway?hsa04210+hsa:3563+hsa:1439+hsa:2353+hsa:637+hsa:10912+hsa:1147+hsa:54205+hsa:1522+hsa:3562+hsa:1514+hsa:27113+hsa:581+hsa:1515+hsa:1508+hsa:8996+hsa:1512+hsa:1075+hsa:1509+hsa:10039+hsa:84790+hsa:1649+hsa:3725+hsa:5414+hsa:1513+hsa:1520+hsa:4000
hsa04621	NOD-like receptor signaling pathway	33	1431	173	7681	0.470935	0.991153	0.190751	ENSG00000100348(TXN2)|ENSG00000165168(CYBB)|ENSG00000142185(TRPM2)|ENSG00000213341(CHUK)|ENSG00000136810(TXN)|ENSG00000108691(CCL2)|ENSG00000110218(PANX1)|ENSG00000163739(CXCL1)|ENSG00000140941(MAP1LC3B)|ENSG00000136869(TLR4)|ENSG00000132357(CARD6)|ENSG00000104312(RIPK2)|ENSG00000169429(CXCL8)|ENSG00000258102(MAP1LC3B2)|ENSG00000057663(ATG5)|ENSG00000103490(PYCARD)|ENSG00000213585(VDAC1)|ENSG0000…	hsa:25828|hsa:1536|hsa:7226|hsa:1147|hsa:7295|hsa:6347|hsa:24145|hsa:2919|hsa:81631|hsa:7099|hsa:84674|hsa:8767|hsa:3576|hsa:643246|hsa:9474|hsa:29108|hsa:7416|hsa:64170|hsa:115362|hsa:5027|hsa:1508|hsa:5331|hsa:7205|hsa:6772|hsa:834|hsa:58484|hsa:820|hsa:7531|hsa:11337|hsa:3725|hsa:2633|hsa:388646|hsa:440738	http://www.kegg.jp/kegg-bin/show_pathway?hsa04621+hsa:25828+hsa:1536+hsa:7226+hsa:1147+hsa:7295+hsa:6347+hsa:24145+hsa:2919+hsa:81631+hsa:7099+hsa:84674+hsa:8767+hsa:3576+hsa:643246+hsa:9474+hsa:29108+hsa:7416+hsa:64170+hsa:115362+hsa:5027+hsa:1508+hsa:5331+hsa:7205+hsa:6772+hsa:834+hsa:58484+hsa:820+hsa:7531+hsa:11337+hsa:3725+hsa:2633+hsa:388646+hsa:440738
hsa04820	Cytoskeleton in muscle cells	43	1431	226	7681	0.46591	0.991153	0.190265	ENSG00000134871(COL4A2)|ENSG00000101680(LAMA1)|ENSG00000105855(ITGB8)|ENSG00000124145(SDC4)|ENSG00000215375(MYL5)|ENSG00000162512(SDC3)|ENSG00000134755(DSC2)|ENSG00000046604(DSG2)|ENSG00000180209(MYLPF)|ENSG00000105048(TNNT1)|ENSG00000183386(FHL3)|ENSG00000092054(MYH7)|ENSG00000104879(CKM)|ENSG00000148677(ANKRD1)|ENSG00000169439(SDC2)|ENSG00000069849(ATP1B3)|ENSG00000221986(MYBPHL)|ENSG0000017216…	hsa:1284|hsa:284217|hsa:3696|hsa:6385|hsa:4636|hsa:9672|hsa:1824|hsa:1829|hsa:29895|hsa:7138|hsa:2275|hsa:4625|hsa:1158|hsa:27063|hsa:6383|hsa:483|hsa:343263|hsa:6641|hsa:7136|hsa:4624|hsa:10611|hsa:830|hsa:58529|hsa:272|hsa:3685|hsa:114793|hsa:9260|hsa:1634|hsa:482|hsa:1465|hsa:4608|hsa:481|hsa:8082|hsa:3679|hsa:7139|hsa:8572|hsa:7135|hsa:287|hsa:1298|hsa:6382|hsa:72|hsa:58|hsa:4000	http://www.kegg.jp/kegg-bin/show_pathway?hsa04820+hsa:1284+hsa:284217+hsa:3696+hsa:6385+hsa:4636+hsa:9672+hsa:1824+hsa:1829+hsa:29895+hsa:7138+hsa:2275+hsa:4625+hsa:1158+hsa:27063+hsa:6383+hsa:483+hsa:343263+hsa:6641+hsa:7136+hsa:4624+hsa:10611+hsa:830+hsa:58529+hsa:272+hsa:3685+hsa:114793+hsa:9260+hsa:1634+hsa:482+hsa:1465+hsa:4608+hsa:481+hsa:8082+hsa:3679+hsa:7139+hsa:8572+hsa:7135+hsa:287+hsa…
hsa05217	Basal cell carcinoma	12	1431	61	7681	0.468544	0.991153	0.196721	ENSG00000130222(GADD45G)|ENSG00000148737(TCF7L2)|ENSG00000174804(FZD4)|ENSG00000107882(SUFU)|ENSG00000124762(CDKN1A)|ENSG00000087088(BAX)|ENSG00000157240(FZD1)|ENSG00000180340(FZD2)|ENSG00000163251(FZD5)|ENSG00000114251(WNT5A)|ENSG00000004975(DVL2)|ENSG00000155760(FZD7)	hsa:10912|hsa:6934|hsa:8322|hsa:51684|hsa:1026|hsa:581|hsa:8321|hsa:2535|hsa:7855|hsa:7474|hsa:1856|hsa:8324	http://www.kegg.jp/kegg-bin/show_pathway?hsa05217+hsa:10912+hsa:6934+hsa:8322+hsa:51684+hsa:1026+hsa:581+hsa:8321+hsa:2535+hsa:7855+hsa:7474+hsa:1856+hsa:8324
hsa00061	Fatty acid biosynthesis	2	1431	18	7681	0.87507	1	0.111111	ENSG00000068366(ACSL4)|ENSG00000197142(ACSL5)	hsa:2182|hsa:51703	http://www.kegg.jp/kegg-bin/show_pathway?hsa00061+hsa:2182+hsa:51703
hsa00220	Arginine biosynthesis	3	1431	22	7681	0.805876	1	0.136364	ENSG00000120053(GOT1)|ENSG00000135821(GLUL)|ENSG00000161653(NAGS)	hsa:2805|hsa:2752|hsa:162417	http://www.kegg.jp/kegg-bin/show_pathway?hsa00220+hsa:2805+hsa:2752+hsa:162417
hsa00232	Caffeine metabolism	1	1431	5	7681	0.6434	1	0.2	ENSG00000171428(NAT1)	hsa:9	http://www.kegg.jp/kegg-bin/show_pathway?hsa00232+hsa:9
hsa00240	Pyrimidine metabolism	7	1431	55	7681	0.909082	1	0.127273	ENSG00000048392(RRM2B)|ENSG00000144130(NT5DC4)|ENSG00000164978(NUDT2)|ENSG00000166548(TK2)|ENSG00000147647(DPYS)|ENSG00000129187(DCTD)|ENSG00000158825(CDA)	hsa:50484|hsa:284958|hsa:318|hsa:7084|hsa:1807|hsa:1635|hsa:978	http://www.kegg.jp/kegg-bin/show_pathway?hsa00240+hsa:50484+hsa:284958+hsa:318+hsa:7084+hsa:1807+hsa:1635+hsa:978
hsa00310	Lysine degradation	9	1431	61	7681	0.827179	1	0.147541	ENSG00000106397(PLOD3)|ENSG00000111275(ALDH2)|ENSG00000120437(ACAT2)|ENSG00000164904(ALDH7A1)|ENSG00000113790(EHHADH)|ENSG00000072210(ALDH3A2)|ENSG00000127884(ECHS1)|ENSG00000138796(HADH)|ENSG00000083444(PLOD1)	hsa:8985|hsa:217|hsa:39|hsa:501|hsa:1962|hsa:224|hsa:1892|hsa:3033|hsa:5351	http://www.kegg.jp/kegg-bin/show_pathway?hsa00310+hsa:8985+hsa:217+hsa:39+hsa:501+hsa:1962+hsa:224+hsa:1892+hsa:3033+hsa:5351
hsa00450	Selenocompound metabolism	3	1431	18	7681	0.678942	1	0.166667	ENSG00000138801(PAPSS1)|ENSG00000179918(SEPHS2)|ENSG00000198431(TXNRD1)	hsa:9061|hsa:22928|hsa:7296	http://www.kegg.jp/kegg-bin/show_pathway?hsa00450+hsa:9061+hsa:22928+hsa:7296
hsa00512	Mucin type O-glycan biosynthesis	5	1431	35	7681	0.80761	1	0.142857	ENSG00000139629(GALNT6)|ENSG00000171155(C1GALT1C1)|ENSG00000109586(GALNT7)|ENSG00000070731(ST6GALNAC2)|ENSG00000223658(C1GALT1C1L)	hsa:11226|hsa:29071|hsa:51809|hsa:10610|hsa:728819	http://www.kegg.jp/kegg-bin/show_pathway?hsa00512+hsa:11226+hsa:29071+hsa:51809+hsa:10610+hsa:728819
hsa00513	Various types of N-glycan biosynthesis	7	1431	42	7681	0.689604	1	0.166667	ENSG00000049860(HEXB)|ENSG00000129562(DAD1)|ENSG00000198856(OSTC)|ENSG00000172339(ALG14)|ENSG00000134825(TMEM258)|ENSG00000131446(MGAT1)|ENSG00000213614(HEXA)	hsa:3074|hsa:1603|hsa:58505|hsa:199857|hsa:746|hsa:4245|hsa:3073	http://www.kegg.jp/kegg-bin/show_pathway?hsa00513+hsa:3074+hsa:1603+hsa:58505+hsa:199857+hsa:746+hsa:4245+hsa:3073
hsa00514	Other types of O-glycan biosynthesis	6	1431	46	7681	0.882127	1	0.130435	ENSG00000106397(PLOD3)|ENSG00000139629(GALNT6)|ENSG00000171155(C1GALT1C1)|ENSG00000109586(GALNT7)|ENSG00000169733(RFNG)|ENSG00000223658(C1GALT1C1L)	hsa:8985|hsa:11226|hsa:29071|hsa:51809|hsa:5986|hsa:728819	http://www.kegg.jp/kegg-bin/show_pathway?hsa00514+hsa:8985+hsa:11226+hsa:29071+hsa:51809+hsa:5986+hsa:728819
hsa00515	Mannose type O-glycan biosynthesis	1	1431	22	7681	0.989354	1	0.0454545	ENSG00000174684(B4GAT1)	hsa:11041	http://www.kegg.jp/kegg-bin/show_pathway?hsa00515+hsa:11041
hsa00532	Glycosaminoglycan biosynthesis - chondroitin sulfate / dermatan sulfate	3	1431	21	7681	0.77884	1	0.142857	ENSG00000122863(CHST3)|ENSG00000171310(CHST11)|ENSG00000180767(CHST13)	hsa:9469|hsa:50515|hsa:166012	http://www.kegg.jp/kegg-bin/show_pathway?hsa00532+hsa:9469+hsa:50515+hsa:166012
hsa00534	Glycosaminoglycan biosynthesis - heparan sulfate / heparin	3	1431	24	7681	0.851627	1	0.125	ENSG00000122254(HS3ST2)|ENSG00000138604(GLCE)|ENSG00000070614(NDST1)	hsa:9956|hsa:26035|hsa:3340	http://www.kegg.jp/kegg-bin/show_pathway?hsa00534+hsa:9956+hsa:26035+hsa:3340
hsa00562	Inositol phosphate metabolism	8	1431	72	7681	0.970675	1	0.111111	ENSG00000141401(IMPA2)|ENSG00000107789(MINPP1)|ENSG00000155252(PI4K2A)|ENSG00000122126(OCRL)|ENSG00000167103(PIP5KL1)|ENSG00000112367(FIG4)|ENSG00000111669(TPI1)|ENSG00000149782(PLCB3)	hsa:3613|hsa:9562|hsa:55361|hsa:4952|hsa:138429|hsa:9896|hsa:7167|hsa:5331	http://www.kegg.jp/kegg-bin/show_pathway?hsa00562+hsa:3613+hsa:9562+hsa:55361+hsa:4952+hsa:138429+hsa:9896+hsa:7167+hsa:5331
hsa00563	Glycosylphosphatidylinositol (GPI)-anchor biosynthesis	5	1431	29	7681	0.650901	1	0.172414	ENSG00000185808(PIGP)|ENSG00000142892(PIGK)|ENSG00000136908(DPM2)|ENSG00000197858(GPAA1)|ENSG00000151665(PIGF)	hsa:51227|hsa:10026|hsa:8818|hsa:8733|hsa:5281	http://www.kegg.jp/kegg-bin/show_pathway?hsa00563+hsa:51227+hsa:10026+hsa:8818+hsa:8733+hsa:5281
hsa00591	Linoleic acid metabolism	3	1431	27	7681	0.902582	1	0.111111	ENSG00000105499(PLA2G4C)|ENSG00000116711(PLA2G4A)|ENSG00000176485(PLAAT3)	hsa:8605|hsa:5321|hsa:11145	http://www.kegg.jp/kegg-bin/show_pathway?hsa00591+hsa:8605+hsa:5321+hsa:11145
hsa00592	alpha-Linolenic acid metabolism	4	1431	23	7681	0.64458	1	0.173913	ENSG00000105499(PLA2G4C)|ENSG00000116711(PLA2G4A)|ENSG00000161533(ACOX1)|ENSG00000176485(PLAAT3)	hsa:8605|hsa:5321|hsa:51|hsa:11145	http://www.kegg.jp/kegg-bin/show_pathway?hsa00592+hsa:8605+hsa:5321+hsa:51+hsa:11145
hsa00601	Glycosphingolipid biosynthesis - lacto and neolacto series	4	1431	27	7681	0.768417	1	0.148148	ENSG00000064225(ST3GAL6)|ENSG00000169255(B3GALNT1)|ENSG00000176597(B3GNT5)|ENSG00000156413(FUT6)	hsa:10402|hsa:8706|hsa:84002|hsa:2528	http://www.kegg.jp/kegg-bin/show_pathway?hsa00601+hsa:10402+hsa:8706+hsa:84002+hsa:2528
hsa00785	Lipoic acid metabolism	2	1431	18	7681	0.87507	1	0.111111	ENSG00000131828(PDHA1)|ENSG00000150768(DLAT)	hsa:5160|hsa:1737	http://www.kegg.jp/kegg-bin/show_pathway?hsa00785+hsa:5160+hsa:1737
hsa00860	Porphyrin metabolism	7	1431	36	7681	0.517294	1	0.194444	ENSG00000004961(HCCS)|ENSG00000167996(FTH1)|ENSG00000100292(HMOX1)|ENSG00000014919(COX15)|ENSG00000090013(BLVRB)|ENSG00000087086(FTL)|ENSG00000023330(ALAS1)	hsa:3052|hsa:2495|hsa:3162|hsa:1355|hsa:645|hsa:2512|hsa:211	http://www.kegg.jp/kegg-bin/show_pathway?hsa00860+hsa:3052+hsa:2495+hsa:3162+hsa:1355+hsa:645+hsa:2512+hsa:211
hsa00910	Nitrogen metabolism	3	1431	17	7681	0.638986	1	0.176471	ENSG00000074410(CA12)|ENSG00000104267(CA2)|ENSG00000135821(GLUL)	hsa:771|hsa:760|hsa:2752	http://www.kegg.jp/kegg-bin/show_pathway?hsa00910+hsa:771+hsa:760+hsa:2752
hsa00970	Aminoacyl-tRNA biosynthesis	7	1431	44	7681	0.737241	1	0.159091	ENSG00000134440(NARS1)|ENSG00000140105(WARS1)|ENSG00000162396(PARS2)|ENSG00000059691(GATB)|ENSG00000090861(AARS1)|ENSG00000179115(FARSA)|ENSG00000113407(TARS1)	hsa:4677|hsa:7453|hsa:25973|hsa:5188|hsa:16|hsa:2193|hsa:6897	http://www.kegg.jp/kegg-bin/show_pathway?hsa00970+hsa:4677+hsa:7453+hsa:25973+hsa:5188+hsa:16+hsa:2193+hsa:6897
hsa01232	Nucleotide metabolism	15	1431	82	7681	0.576566	1	0.182927	ENSG00000179630(LACC1)|ENSG00000048392(RRM2B)|ENSG00000162433(AK4)|ENSG00000100938(GMPR2)|ENSG00000185100(ADSS1)|ENSG00000133805(AMPD3)|ENSG00000144130(NT5DC4)|ENSG00000165695(AK8)|ENSG00000198585(NUDT16)|ENSG00000166548(TK2)|ENSG00000129187(DCTD)|ENSG00000135778(NTPCR)|ENSG00000085231(AK6)|ENSG00000158825(CDA)|ENSG00000004455(AK2)	hsa:144811|hsa:50484|hsa:205|hsa:51292|hsa:122622|hsa:272|hsa:284958|hsa:158067|hsa:131870|hsa:7084|hsa:1635|hsa:84284|hsa:102157402|hsa:978|hsa:204	http://www.kegg.jp/kegg-bin/show_pathway?hsa01232+hsa:144811+hsa:50484+hsa:205+hsa:51292+hsa:122622+hsa:272+hsa:284958+hsa:158067+hsa:131870+hsa:7084+hsa:1635+hsa:84284+hsa:102157402+hsa:978+hsa:204
hsa01521	EGFR tyrosine kinase inhibitor resistance	11	1431	79	7681	0.893268	1	0.139241	ENSG00000100311(PDGFB)|ENSG00000187840(EIF4EBP1)|ENSG00000019991(HGF)|ENSG00000096968(JAK2)|ENSG00000134853(PDGFRA)|ENSG00000163235(TGFA)|ENSG00000087088(BAX)|ENSG00000167601(AXL)|ENSG00000105976(MET)|ENSG00000112715(VEGFA)|ENSG00000065361(ERBB3)	hsa:5155|hsa:1978|hsa:3082|hsa:3717|hsa:5156|hsa:7039|hsa:581|hsa:558|hsa:4233|hsa:7422|hsa:2065	http://www.kegg.jp/kegg-bin/show_pathway?hsa01521+hsa:5155+hsa:1978+hsa:3082+hsa:3717+hsa:5156+hsa:7039+hsa:581+hsa:558+hsa:4233+hsa:7422+hsa:2065
hsa01522	Endocrine resistance	12	1431	97	7681	0.963353	1	0.123711	ENSG00000101384(JAG1)|ENSG00000170345(FOS)|ENSG00000110092(CCND1)|ENSG00000087245(MMP2)|ENSG00000155897(ADCY8)|ENSG00000124762(CDKN1A)|ENSG00000087088(BAX)|ENSG00000135446(CDK4)|ENSG00000113070(HBEGF)|ENSG00000135679(MDM2)|ENSG00000177606(JUN)|ENSG00000138031(ADCY3)	hsa:182|hsa:2353|hsa:595|hsa:4313|hsa:114|hsa:1026|hsa:581|hsa:1019|hsa:1839|hsa:4193|hsa:3725|hsa:109	http://www.kegg.jp/kegg-bin/show_pathway?hsa01522+hsa:182+hsa:2353+hsa:595+hsa:4313+hsa:114+hsa:1026+hsa:581+hsa:1019+hsa:1839+hsa:4193+hsa:3725+hsa:109
hsa01523	Antifolate resistance	5	1431	30	7681	0.681738	1	0.166667	ENSG00000213341(CHUK)|ENSG00000108846(ABCC3)|ENSG00000137563(GGH)|ENSG00000118777(ABCG2)|ENSG00000110203(FOLR3)	hsa:1147|hsa:8714|hsa:8836|hsa:9429|hsa:2352	http://www.kegg.jp/kegg-bin/show_pathway?hsa01523+hsa:1147+hsa:8714+hsa:8836+hsa:9429+hsa:2352
hsa02010	ABC transporters	8	1431	44	7681	0.59172	1	0.181818	ENSG00000160179(ABCG1)|ENSG00000101986(ABCD1)|ENSG00000108846(ABCC3)|ENSG00000121270(ABCC11)|ENSG00000091262(ABCC6)|ENSG00000118777(ABCG2)|ENSG00000004846(ABCB5)|ENSG00000138075(ABCG5)	hsa:9619|hsa:215|hsa:8714|hsa:85320|hsa:368|hsa:9429|hsa:340273|hsa:64240	http://www.kegg.jp/kegg-bin/show_pathway?hsa02010+hsa:9619+hsa:215+hsa:8714+hsa:85320+hsa:368+hsa:9429+hsa:340273+hsa:64240
hsa03008	Ribosome biogenesis in eukaryotes	7	1431	78	7681	0.994445	1	0.0897436	ENSG00000147206(NXF3)|ENSG00000242372(EIF6)|ENSG00000101888(NXT2)|ENSG00000178718(RPP25)|ENSG00000164967(RPP25L)|ENSG00000182117(NOP10)|ENSG00000085231(AK6)	hsa:56000|hsa:3692|hsa:55916|hsa:54913|hsa:138716|hsa:55505|hsa:102157402	http://www.kegg.jp/kegg-bin/show_pathway?hsa03008+hsa:56000+hsa:3692+hsa:55916+hsa:54913+hsa:138716+hsa:55505+hsa:102157402
hsa03010	Ribosome	17	1431	132	7681	0.97059	1	0.128788	ENSG00000280969(RPS4Y2)|ENSG00000140986(RPL3L)|ENSG00000171421(MRPL36)|ENSG00000182180(MRPS16)|ENSG00000185088(RPS27L)|ENSG00000243147(MRPL33)|ENSG00000172172(MRPL13)|ENSG00000137547(MRPL15)|ENSG00000105364(MRPL4)|ENSG00000008988(RPS20)|ENSG00000120333(MRPS14)|ENSG00000037241(RPL26L1)|ENSG00000174547(MRPL11)|ENSG00000130312(MRPL34)|ENSG00000128626(MRPS12)|ENSG00000132313(MRPL35)|ENSG00000116898(M…	hsa:140032|hsa:6123|hsa:64979|hsa:51021|hsa:51065|hsa:9553|hsa:28998|hsa:29088|hsa:51073|hsa:6224|hsa:63931|hsa:51121|hsa:65003|hsa:64981|hsa:6183|hsa:51318|hsa:64960	http://www.kegg.jp/kegg-bin/show_pathway?hsa03010+hsa:140032+hsa:6123+hsa:64979+hsa:51021+hsa:51065+hsa:9553+hsa:28998+hsa:29088+hsa:51073+hsa:6224+hsa:63931+hsa:51121+hsa:65003+hsa:64981+hsa:6183+hsa:51318+hsa:64960
hsa03013	Nucleocytoplasmic transport	4	1431	106	7681	0.999999	1	0.0377358	ENSG00000147206(NXF3)|ENSG00000109133(TMEM33)|ENSG00000101888(NXT2)|ENSG00000117408(IPO13)	hsa:56000|hsa:55161|hsa:55916|hsa:9670	http://www.kegg.jp/kegg-bin/show_pathway?hsa03013+hsa:56000+hsa:55161+hsa:55916+hsa:9670
hsa03015	mRNA surveillance pathway	6	1431	93	7681	0.999813	1	0.0645161	ENSG00000147206(NXF3)|ENSG00000119203(CPSF3)|ENSG00000152684(PELO)|ENSG00000101888(NXT2)|ENSG00000165934(CPSF2)|ENSG00000104695(PPP2CB)	hsa:56000|hsa:51692|hsa:53918|hsa:55916|hsa:53981|hsa:5516	http://www.kegg.jp/kegg-bin/show_pathway?hsa03015+hsa:56000+hsa:51692+hsa:53918+hsa:55916+hsa:53981+hsa:5516
hsa03018	RNA degradation	7	1431	76	7681	0.99275	1	0.0921053	ENSG00000154640(BTG3)|ENSG00000171311(EXOSC1)|ENSG00000135698(MPHOSPH6)|ENSG00000164167(LSM6)|ENSG00000178896(EXOSC4)|ENSG00000130520(LSM4)|ENSG00000198585(NUDT16)	hsa:10950|hsa:51013|hsa:10200|hsa:11157|hsa:54512|hsa:25804|hsa:131870	http://www.kegg.jp/kegg-bin/show_pathway?hsa03018+hsa:10950+hsa:51013+hsa:10200+hsa:11157+hsa:54512+hsa:25804+hsa:131870
hsa03020	RNA polymerase	2	1431	34	7681	0.992162	1	0.0588235	ENSG00000099817(POLR2E)|ENSG00000100142(POLR2F)	hsa:5434|hsa:5435	http://www.kegg.jp/kegg-bin/show_pathway?hsa03020+hsa:5434+hsa:5435
hsa03022	Basal transcription factors	8	1431	43	7681	0.563678	1	0.186047	ENSG00000197265(GTF2E2)|ENSG00000272047(GTF2H5)|ENSG00000134058(CDK7)|ENSG00000273841(TAF9)|ENSG00000183474(GTF2H2C)|ENSG00000104884(ERCC2)|ENSG00000197780(TAF13)|ENSG00000120656(TAF12)	hsa:2961|hsa:404672|hsa:1022|hsa:6880|hsa:728340|hsa:2068|hsa:6884|hsa:6883	http://www.kegg.jp/kegg-bin/show_pathway?hsa03022+hsa:2961+hsa:404672+hsa:1022+hsa:6880+hsa:728340+hsa:2068+hsa:6884+hsa:6883
hsa03030	DNA replication	2	1431	36	7681	0.99455	1	0.0555556	ENSG00000132646(PCNA)|ENSG00000172922(RNASEH2C)	hsa:5111|hsa:84153	http://www.kegg.jp/kegg-bin/show_pathway?hsa03030+hsa:5111+hsa:84153
hsa03040	Spliceosome	7	1431	152	7681	1	1	0.0460526	ENSG00000106245(BUD31)|ENSG00000109971(HSPA8)|ENSG00000164167(LSM6)|ENSG00000130520(LSM4)|ENSG00000204389(HSPA1A)|ENSG00000204388(HSPA1B)|ENSG00000173110(HSPA6)	hsa:8896|hsa:3312|hsa:11157|hsa:25804|hsa:3303|hsa:3304|hsa:3310	http://www.kegg.jp/kegg-bin/show_pathway?hsa03040+hsa:8896+hsa:3312+hsa:11157+hsa:25804+hsa:3303+hsa:3304+hsa:3310
hsa03060	Protein export	6	1431	31	7681	0.531203	1	0.193548	ENSG00000182093(GET1)|ENSG00000106803(SEC61B)|ENSG00000114902(SPCS1)|ENSG00000129128(SPCS3)|ENSG00000168701(TMEM208)|ENSG00000198356(GET3)	hsa:7485|hsa:10952|hsa:28972|hsa:60559|hsa:29100|hsa:439	http://www.kegg.jp/kegg-bin/show_pathway?hsa03060+hsa:7485+hsa:10952+hsa:28972+hsa:60559+hsa:29100+hsa:439
hsa03082	ATP-dependent chromatin remodeling	6	1431	111	7681	0.99999	1	0.0540541	ENSG00000196591(HDAC2)|ENSG00000274997(H2AC12)|ENSG00000082014(SMARCD3)|ENSG00000276903(H2AC16)|ENSG00000115274(INO80B)|ENSG00000105619(TFPT)	hsa:3066|hsa:85235|hsa:6604|hsa:8332|hsa:83444|hsa:29844	http://www.kegg.jp/kegg-bin/show_pathway?hsa03082+hsa:3066+hsa:85235+hsa:6604+hsa:8332+hsa:83444+hsa:29844
hsa03083	Polycomb repressive complex	8	1431	82	7681	0.991219	1	0.097561	ENSG00000198176(TFDP1)|ENSG00000277258(PCGF2)|ENSG00000196591(HDAC2)|ENSG00000196981(WDR5B)|ENSG00000156374(PCGF6)|ENSG00000141570(CBX8)|ENSG00000169016(E2F6)|ENSG00000115289(PCGF1)	hsa:7027|hsa:7703|hsa:3066|hsa:54554|hsa:84108|hsa:57332|hsa:1876|hsa:84759	http://www.kegg.jp/kegg-bin/show_pathway?hsa03083+hsa:7027+hsa:7703+hsa:3066+hsa:54554+hsa:84108+hsa:57332+hsa:1876+hsa:84759
hsa03250	Viral life cycle - HIV-1	7	1431	64	7681	0.967112	1	0.109375	ENSG00000170248(PDCD6IP)|ENSG00000132824(SERINC3)|ENSG00000130479(MAP1S)|ENSG00000100298(APOBEC3H)|ENSG00000135272(MDFIC)|ENSG00000130303(BST2)|ENSG00000160791(CCR5)	hsa:10015|hsa:10955|hsa:55201|hsa:164668|hsa:29969|hsa:684|hsa:1234	http://www.kegg.jp/kegg-bin/show_pathway?hsa03250+hsa:10015+hsa:10955+hsa:55201+hsa:164668+hsa:29969+hsa:684+hsa:1234
hsa03267	Virion - Adenovirus	1	1431	4	7681	0.5617	1	0.25	ENSG00000114013(CD86)	hsa:942	http://www.kegg.jp/kegg-bin/show_pathway?hsa03267+hsa:942
hsa03410	Base excision repair	3	1431	44	7681	0.993144	1	0.0681818	ENSG00000132646(PCNA)|ENSG00000041880(PARP3)|ENSG00000123415(SMUG1)	hsa:5111|hsa:10039|hsa:23583	http://www.kegg.jp/kegg-bin/show_pathway?hsa03410+hsa:5111+hsa:10039+hsa:23583
hsa03420	Nucleotide excision repair	7	1431	62	7681	0.95837	1	0.112903	ENSG00000099817(POLR2E)|ENSG00000132646(PCNA)|ENSG00000100142(POLR2F)|ENSG00000272047(GTF2H5)|ENSG00000134058(CDK7)|ENSG00000183474(GTF2H2C)|ENSG00000104884(ERCC2)	hsa:5434|hsa:5111|hsa:5435|hsa:404672|hsa:1022|hsa:728340|hsa:2068	http://www.kegg.jp/kegg-bin/show_pathway?hsa03420+hsa:5434+hsa:5111+hsa:5435+hsa:404672+hsa:1022+hsa:728340+hsa:2068
[truncated: 148 more rows]
