# Supplementary material
Source: Research Square preprint supplement (doi:10.21203/rs.3.rs-9239420/v1)
Supplement: Supplementary file 11 [file fb654aca8eeedd6406a81dda.xlsx]

## Sheet: Sheet 1
DEGs of iMG cells derived from schizophrenia patients and controls
gene_id	Count_ Ctrl-7	Count_ Ctrl-8	Count_ Ctrl-9	Count_ Ctrl-10	Count_ Ctrl-11	Count_ Ctrl-12	Count_ Ctrl-13	Count_ Ctrl-14	Count_ Ctrl-15	Count_ Ctrl-16	Count_ Ctrl-17	Count_ Ctrl-18	Count_ Ctrl-19	Count_ Ctrl-20	Count_ Ctrl-21	Count_ Ctrl-22	Count_ Ctrl-23	Count_ Ctrl-24	Count_ SCZ-1	Count_ SCZ-2	Count_ SCZ-3	Count_ SCZ-4	Count_ SCZ-5	Count_ SCZ-26	Count_ SCZ-27	Count_ SCZ-6	Count_ SCZ-7	Count_ SCZ-8	Count_ SCZ-9	Count_ SCZ-10	Count_ SCZ-28	Count_ SCZ-29	Count_ SCZ-16	Count_ SCZ-17	Count_ SCZ-18	Count_ SCZ-19	Count_ SCZ-20	Count_ SCZ-30	Count_ SCZ-31	Count_ SCZ-21	Count_ SCZ-22	Count_ SCZ-23	Count_ SCZ-24	Count_ SCZ-25	Count_ SCZ-32	Count_ SCZ-33	FPKM_ Ctrl-7	FPKM_ Ctrl-8	FPKM_ Ctrl-9
ENSG00000186827	19	11	7	5	5	25	10	17	15	12	10	8	0	1	4	10	0	4	13	25	25	30	28	11	11	17	33	17	32	30	18	25	34	27	39	53	36	32	34	7	17	10	13	15	8	3	0.356374	0.232707	0.133116
ENSG00000186891	82	105	74	63	82	68	97	69	106	82	112	94	13	8	21	20	12	43	41	24	68	51	36	23	7	23	48	47	63	58	27	31	68	124	92	134	99	69	92	54	87	63	52	91	72	45	2.08379	3.0095	1.90657
ENSG00000160072	80	46	67	71	86	63	59	59	78	60	79	58	10	29	12	18	35	33	21	23	9	23	13	8	4	29	32	15	18	30	18	25	68	82	74	102	98	81	42	67	111	98	61	79	78	83	0.336183	0.218026	0.285457
ENSG00000041988	245	220	240	173	262	209	169	174	219	190	220	170	64	65	81	68	92	95	99	110	67	108	88	39	44	129	121	110	153	135	62	126	196	208	202	193	234	157	153	259	305	283	210	214	241	291	1.94332	1.96818	1.93005
ENSG00000260179	9	2	12	4	2	9	7	1	5	3	7	4	2	5	1	1	3	2	6	19	19	4	3	6	0	6	5	12	10	4	15	6	1	3	1	8	2	2	2	10	1	6	6	7	11	2	0.186578	0.0467642	0.25222
ENSG00000234396	0	0	6	0	1	0	0	0	0	0	0	0	0	0	0	0	0	0	0	0	0	0	0	0	0	0	0	0	0	0	0	0	0	0	0	0	0	0	0	0	0	0	0	0	0	0	0	0	0.602697
ENSG00000225972	6	2	11	3	3	5	2	1	4	3	3	8	3	8	6	6	7	12	16	19	11	10	10	8	11	26	18	14	25	21	6	18	21	12	12	11	10	7	8	9	20	14	16	17	21	7	0.520948	0.195856	0.968312
ENSG00000224315	2	5	0	0	2	2	8	4	7	10	2	7	0	0	0	0	0	0	6	3	2	7	11	0	3	2	6	0	0	0	4	2	0	0	0	0	0	0	0	0	0	6	2	8	2	0	0.0918884	0.259099	0
ENSG00000198744	3	1	4	1	1	1	3	2	0	1	0	3	4	4	8	5	1	2	0	2	1	3	1	1	6	10	3	5	3	0	3	2	0	4	1	4	3	4	4	1	4	1	3	5	1	7	0.177141	0.0665984	0.239463
ENSG00000279928	0	0	0	0	0	0	0	0	0	0	0	0	0	0	0	0	0	0	7	8	9	9	4	6	15	53	51	15	36	65	38	30	0	0	0	0	0	0	0	0	0	1	2	1	2	0	0	0	0
ENSG00000228037	32	44	49	32	35	39	53	64	54	80	75	82	26	17	23	15	25	27	28	40	37	34	44	48	23	32	47	24	35	40	15	15	88	77	102	102	105	89	67	79	178	131	121	123	108	155	1.65106	2.56053	2.56323
ENSG00000142611	0	3	0	0	6	4	0	2	0	2	4	0	1	4	0	1	4	1	0	0	0	4	0	0	0	5	6	8	5	6	14	0	0	0	0	0	0	0	0	2	0	0	0	0	0	0	0	0.0111895	0
ENSG00000225630	817	702	789	638	891	786	1062	1031	1101	1242	1143	1094	221	211	199	208	210	291	3134	3110	3257	3015	3203	2029	1911	4769	4473	2863	4263	4187	2704	2812	521	638	593	541	620	567	502	1342	1908	1843	1432	1584	1669	1653	25.276	24.4956	24.7481
ENSG00000067606	17	23	29	18	13	15	21	16	18	25	25	39	6	10	5	4	8	6	20	24	18	26	19	15	21	40	28	22	42	22	18	18	11	21	8	9	10	17	21	44	55	49	58	34	70	70	0.0713553	0.108885	0.123411
ENSG00000131584	32	20	22	19	35	55	36	40	32	31	30	27	34	17	19	12	14	21	19	18	9	24	13	12	8	27	26	19	18	34	20	32	27	34	29	35	45	29	22	45	34	45	38	37	32	36	0.118705	0.0836782	0.0827408
ENSG00000227589	2	0	1	0	1	0	0	0	0	0	0	0	0	0	0	0	0	0	0	0	0	0	0	0	0	0	4	0	0	2	0	2	0	0	0	0	0	0	4	2	8	2	2	3	6	0	0.0856731	0	0.0434304
ENSG00000237402	2	1	3	0	0	0	0	0	2	0	0	0	0	0	0	0	0	1	0	0	1	0	0	0	0	0	2	0	0	0	0	0	0	1	0	0	0	0	0	1	0	0	0	0	0	0	0.17698	0.0998063	0.26915
ENSG00000169972	97	90	79	91	108	91	86	86	102	102	103	99	26	25	28	33	35	26	13	20	12	21	17	9	19	25	13	14	36	19	6	20	42	45	38	35	31	41	30	53	54	61	83	60	57	69	1.27409	1.33332	1.05204
ENSG00000157911	14	11	18	10	8	12	8	11	5	12	16	13	7	4	4	2	4	16	4	5	6	1	7	0	3	6	8	11	6	20	8	11	9	6	13	19	17	14	15	13	16	18	13	6	6	2	0.119562	0.105955	0.155853
ENSG00000269896	8	3	4	4	0	2	0	0	0	0	0	0	0	0	0	0	0	4	0	0	0	0	0	0	0	4	3	4	4	2	2	4	2	2	0	1	0	0	0	2	2	2	8	4	6	10	0.107349	0.0454042	0.0544189
ENSG00000237973	131	107	131	87	147	127	94	97	75	115	118	87	146	124	173	159	178	207	268	281	326	261	289	196	149	889	854	585	857	868	499	484	202	276	275	233	242	206	172	255	434	342	326	356	327	378	2.74215	2.52621	2.78017
ENSG00000224051	18	31	29	31	31	34	21	21	23	35	25	28	11	12	10	11	5	8	2	2	7	3	0	0	0	10	10	4	4	13	4	6	12	8	7	9	20	9	3	9	19	12	8	22	16	8	0.227545	0.441999	0.371683
ENSG00000228463	20	14	15	10	28	23	20	14	25	8	20	25	14	21	23	14	12	28	7	4	14	8	2	7	4	12	10	19	16	20	9	22	33	25	37	33	47	30	32	23	23	50	13	35	25	48	0.0785476	0.0620149	0.0597274
ENSG00000238260	3	3	2	0	1	0	0	0	0	0	0	0	0	0	0	0	0	0	0	0	0	0	0	1	2	0	0	0	0	0	0	0	0	0	0	0	0	0	0	2	4	1	2	0	2	3	0.155782	0.175704	0.105294
ENSG00000260972	0	0	0	0	0	0	0	0	0	0	0	0	0	0	0	0	0	0	0	0	1	0	0	0	0	0	0	0	0	0	0	0	0	0	0	0	0	0	0	0	0	0	0	0	0	0	0	0	0
ENSG00000157933	82	66	77	69	83	83	51	66	62	62	64	66	48	57	83	65	59	72	164	156	192	125	153	80	76	138	115	75	103	90	64	46	53	102	68	86	80	76	88	92	75	104	88	85	79	98	0.404351	0.367074	0.384959
ENSG00000162591	169	137	169	133	195	122	126	141	146	161	132	151	154	83	138	104	187	169	252	256	346	286	328	183	190	193	130	139	136	202	107	115	352	346	366	366	316	298	305	384	609	594	498	441	548	555	0.605087	0.553244	0.613476
ENSG00000224340	0	0	0	0	0	0	0	0	0	0	0	0	0	0	0	0	0	0	0	0	0	0	0	0	0	0	0	0	0	0	0	0	0	0	0	0	0	0	0	0	1	2	1	0	0	0	0	0	0
ENSG00000270035	0	0	0	0	0	0	0	0	0	0	2	0	0	0	0	0	0	0	0	0	0	0	0	0	0	0	0	0	0	0	0	0	0	2	0	0	0	0	0	0	0	0	0	0	0	1	0	0	0
ENSG00000169962	9	10	6	4	4	2	2	2	0	6	2	2	4	2	0	3	9	2	2	0	5	4	2	0	0	0	0	0	0	0	0	0	4	3	2	2	6	10	6	6	4	0	2	0	2	2	0.0836515	0.104833	0.0565408
ENSG00000226545	3	5	4	3	0	0	0	0	0	1	4	0	0	0	0	0	0	0	4	0	0	2	0	0	2	1	3	1	1	3	0	0	0	0	0	0	0	0	0	0	1	0	0	1	2	0	0.233485	0.438907	0.315629
ENSG00000268663	0	2	2	0	0	0	0	0	0	0	0	0	0	0	0	0	0	0	0	0	0	0	0	0	0	0	0	0	0	0	0	0	0	0	0	0	0	0	0	0	0	0	0	0	0	0	0	0.171836	0.154465
ENSG00000116285	254	266	269	234	275	292	185	214	176	252	236	211	80	70	92	74	87	125	86	99	98	68	99	65	59	83	97	65	97	117	62	91	200	206	164	168	200	196	170	50	48	35	23	25	29	56	1.96312	2.31878	2.10788
ENSG00000142655	112	71	92	85	94	94	96	137	127	125	97	134	188	196	224	180	219	246	21	25	40	46	27	24	22	32	45	27	49	52	25	24	27	40	32	45	23	48	36	15	19	29	23	29	25	26	1.23379	0.882156	1.02752
ENSG00000232596	0	0	0	0	0	0	0	0	0	0	0	0	0	0	0	0	0	0	0	0	0	0	0	0	0	0	0	0	0	0	0	0	0	0	0	0	0	0	0	0	0	0	0	0	0	0	0	0	0
ENSG00000232663	0	0	0	0	0	0	0	0	0	0	0	0	0	0	0	0	0	0	3	5	4	7	3	3	2	1	4	4	2	0	0	0	0	5	4	5	2	2	4	3	21	4	11	8	14	7	0	0	0
ENSG00000240409	0	0	0	0	0	0	0	0	0	0	0	1	0	0	0	0	0	0	3	0	1	2	0	0	0	3	3	0	1	0	3	1	0	0	0	0	0	0	0	0	0	0	0	0	0	0	0	0	0
ENSG00000229344	1	3	2	1	0	1	2	4	1	2	3	3	8	5	5	7	8	1	2	2	0	4	5	6	3	1	1	2	6	4	2	1	3	3	4	4	2	2	3	3	9	11	6	5	3	1	0.0473589	0.160246	0.0960309
ENSG00000231510	0	0	0	0	0	0	0	0	0	0	0	0	0	0	0	0	0	0	0	0	0	0	0	0	0	0	1	0	0	0	0	0	0	0	0	0	0	0	0	0	0	0	0	0	0	0	0	0	0
ENSG00000149527	2	1	2	9	8	6	4	6	2	4	0	7	4	4	3	6	9	3	4	17	13	7	6	6	3	1	16	3	8	19	2	3	1	3	0	8	6	5	2	5	3	6	1	3	1	4	0.00597627	0.00337027	0.00605913
ENSG00000284739	0	0	0	0	0	0	0	0	0	0	0	0	0	0	0	0	0	0	0	0	0	0	0	0	0	0	0	0	0	0	2	0	0	0	0	0	0	0	0	0	0	0	0	0	0	0	0	0	0
ENSG00000007923	392	294	302	293	374	396	364	390	306	360	397	359	195	253	225	212	245	280	439	453	433	428	482	293	307	482	459	342	474	485	311	313	292	234	252	284	263	194	225	343	370	374	357	345	418	484	2.49087	2.10707	1.94559
ENSG00000171621	187	182	215	160	202	202	110	138	134	166	123	152	100	67	133	70	83	118	15	9	27	15	14	18	8	54	27	20	34	35	22	17	63	81	67	81	55	46	79	46	57	53	55	45	70	73	1.7822	1.95637	2.07746
ENSG00000272235	0	0	0	0	0	0	0	0	0	0	0	0	0	0	0	0	0	0	0	0	0	0	0	0	0	4	1	4	4	2	4	0	1	0	0	0	3	1	0	0	0	0	0	0	0	0	0	0	0
ENSG00000236679	5	8	4	3	6	2	3	1	9	0	3	0	3	3	2	2	4	3	0	0	0	4	1	3	2	6	5	2	1	4	2	0	5	0	2	1	6	1	1	0	0	5	3	1	0	7	0.419465	0.756972	0.340224
ENSG00000162441	1322	1178	1291	1107	1371	1257	1079	1047	1092	1172	1331	1193	1352	1325	1680	1481	1712	1844	447	373	410	413	484	303	278	567	596	369	567	597	359	395	850	953	862	924	1107	871	780	887	1161	1028	908	887	1177	1208	7.82176	7.86109	7.74424
ENSG00000230021	0	0	3	0	0	4	1	0	3	2	3	0	6	0	2	1	0	12	8	1	1	2	3	3	0	2	5	5	1	2	0	2	2	1	0	1	0	3	3	0	1	1	2	2	3	0	0	0	0.017878
ENSG00000287356	0	0	0	0	0	0	2	0	0	2	0	1	2	0	0	2	2	2	0	0	2	2	1	2	0	2	2	0	1	3	0	4	0	0	0	0	0	0	0	0	0	0	3	0	9	0	0	0	0
ENSG00000224387	0	0	0	0	0	2	0	0	0	0	0	2	0	5	2	0	4	4	0	2	0	1	0	2	0	0	0	0	0	0	0	0	0	7	6	0	5	1	2	2	0	2	2	3	2	0	0	0	0
ENSG00000187017	3	0	5	0	0	4	1	2	8	0	2	1	2	0	0	0	2	0	4	9	3	2	4	3	3	3	2	1	0	0	0	0	5	11	1	8	15	2	8	2	2	2	0	5	2	0	0.0139379	0	0.0235519
ENSG00000285629	1	0	0	0	0	0	0	0	0	0	0	0	0	0	0	0	0	0	0	0	0	0	0	0	0	1	0	0	0	0	0	0	0	0	0	0	0	0	0	0	0	0	0	0	0	0	0.0487161	0	0
ENSG00000227372	60	86	93	85	87	65	85	132	118	123	107	101	40	44	61	62	52	50	44	59	65	50	63	44	38	118	76	51	94	98	66	69	147	198	200	171	164	106	163	87	107	141	92	81	87	110	0.199766	0.322948	0.313929
ENSG00000142583	44	54	61	58	63	35	35	29	44	42	46	37	41	34	28	39	37	57	41	44	27	35	29	32	28	50	64	41	107	57	31	33	18	24	50	35	25	22	13	65	108	78	59	100	74	67	0.214286	0.29662	0.301197
ENSG00000223663	2	0	4	1	0	5	10	4	8	11	2	4	1	0	4	8	2	4	0	0	2	0	0	0	0	4	6	0	6	1	0	2	10	9	5	10	10	12	17	0	0	0	0	0	0	0	0.176015	0	0.356911
ENSG00000107404	110	114	109	67	125	123	102	57	89	103	91	90	71	65	112	63	77	72	67	59	99	56	79	44	43	45	52	31	43	52	26	27	129	147	121	131	144	101	108	90	150	180	90	139	104	104	0.915215	1.06979	0.919468
ENSG00000177000	276	243	285	207	257	245	229	202	248	299	293	265	185	175	200	212	219	253	114	110	124	127	119	69	58	199	202	112	183	187	89	80	197	184	173	187	190	132	163	152	181	214	160	207	144	201	0.774295	0.768898	0.810629
ENSG00000272161	0	0	0	0	0	0	0	0	0	0	0	0	0	0	0	0	0	0	0	0	0	0	0	0	0	0	0	0	0	0	0	0	0	0	0	0	0	0	0	0	10	0	0	0	5	0	0	0	0
ENSG00000237094	1	1	1	0	1	4	1	2	5	0	16	0	0	0	2	0	1	0	30	32	47	33	23	29	20	49	17	23	29	10	13	9	2	0	4	15	0	7	0	1	1	5	1	1	3	15	0.00520612	0.00587191	0.0052783
ENSG00000069424	1186	1037	1150	971	1211	1180	916	835	1045	1041	1066	1007	542	544	704	681	633	681	491	458	503	523	478	323	255	550	506	347	503	496	368	321	1018	1014	1004	1030	961	855	855	713	906	935	777	844	755	835	2.21053	2.18	2.17315
ENSG00000074800	13304	11822	12979	10661	13940	12805	11945	11026	12363	12873	13386	12387	6330	5979	7483	6749	7777	8554	3702	3853	4324	3603	4204	2564	2510	6572	6066	4090	6108	6259	3793	4307	13832	15185	14072	15281	16089	12522	12283	8839	11829	11631	9587	10926	10508	11784	82.3817	82.5666	81.4834
ENSG00000234546	65	71	76	45	56	58	47	60	36	36	39	25	41	36	54	54	46	50	2	2	10	0	2	1	0	0	0	0	0	0	0	0	2	0	14	5	6	4	4	6	10	10	11	8	6	8	0.980579	1.20807	1.16242
ENSG00000116786	640	565	565	469	662	498	519	513	536	617	592	457	313	260	377	347	351	415	294	276	372	311	375	210	197	380	290	274	346	334	228	219	283	390	316	345	377	258	210	160	259	275	146	234	209	252	5.00029	4.97885	4.47552
ENSG00000287727	13	22	8	12	14	21	5	0	12	4	8	0	4	8	8	4	4	12	36	22	24	34	20	15	26	9	12	19	21	37	10	8	6	0	10	5	11	6	8	11	8	17	8	16	6	23	0.145996	0.278666	0.0910892
ENSG00000176022	83	59	78	64	78	75	51	72	66	78	54	49	61	53	87	66	81	74	71	67	77	60	81	38	37	72	54	55	87	47	43	50	64	98	82	90	84	72	63	83	92	145	97	90	44	100	0.955721	0.766249	0.910599
ENSG00000228423	38	19	19	33	32	23	34	25	33	53	45	33	13	17	16	18	7	19	58	60	66	67	71	48	42	80	58	44	71	79	37	37	57	47	46	45	53	37	56	79	86	91	72	117	106	101	3.47692	1.96078	1.76256
ENSG00000286448	0	0	0	0	0	0	0	0	0	0	0	0	0	2	2	0	0	1	0	0	0	0	0	0	0	0	0	0	0	0	0	0	0	0	0	0	0	0	0	0	0	0	0	0	0	0	0	0	0
ENSG00000162496	2584	2161	2474	2001	2574	2461	2161	2026	2193	2251	2373	2277	1999	1877	2383	2133	2440	2439	7088	7543	8241	7264	8241	4501	4519	11776	10884	7548	10890	11519	6622	6523	4649	5190	4811	5039	5332	4098	4117	3289	4619	4695	3814	4101	3957	4383	23.744	22.3965	23.0484
ENSG00000131686	25	19	12	14	18	13	12	17	25	24	33	7	6	10	5	10	6	7	190	199	224	248	214	157	134	270	276	196	189	248	179	136	239	267	245	272	291	241	266	617	840	864	654	782	762	801	0.303332	0.260014	0.147618
ENSG00000229305	0	0	0	0	0	0	0	0	0	0	0	0	0	0	0	0	0	0	0	0	0	1	0	0	0	0	0	0	0	0	0	0	0	0	0	0	0	0	0	0	0	0	0	0	0	0	0	0	0
ENSG00000284703	0	0	0	0	0	0	0	0	0	0	0	0	0	0	0	0	0	0	6	2	5	0	11	0	0	6	4	2	7	3	1	5	0	0	0	0	0	0	0	1	0	2	2	2	2	0	0	0	0
ENSG00000226457	13	11	13	8	10	14	8	11	19	22	9	8	4	0	2	2	2	2	9	7	8	15	9	11	6	34	16	34	17	22	11	20	24	32	15	28	28	21	16	8	26	5	13	11	19	13	1.10206	1.05176	1.11734
ENSG00000162494	0	0	0	0	0	0	0	0	2	2	2	2	0	0	0	0	0	0	0	0	0	0	0	0	0	0	0	0	0	0	0	0	0	0	0	0	0	0	0	0	0	0	0	0	2	0	0	0	0
ENSG00000173614	309	291	310	215	298	280	211	198	257	248	298	274	138	144	193	147	195	221	50	43	38	45	30	44	32	67	54	36	61	82	54	35	80	61	93	64	103	70	60	149	232	241	172	209	183	191	2.16493	2.29955	2.20205
ENSG00000248527	2683	2536	2822	2287	2918	2740	2807	2571	2779	3042	3159	2670	2491	2323	3018	2794	3011	3414	7034	7736	8169	7347	8257	5043	4736	9727	9087	5957	8670	9124	5282	4820	4118	4478	4214	4454	4539	3812	3745	5752	7300	7495	5658	6574	6878	7369	127.251	135.66	135.699
ENSG00000215720	0	0	2	0	0	0	1	1	0	2	0	3	0	0	0	0	0	0	0	0	0	0	2	0	0	0	0	0	0	0	2	0	0	0	0	0	0	0	0	2	0	1	0	2	1	0	0	0	0.0922438
ENSG00000279804	0	0	0	0	0	0	0	0	0	0	0	0	0	0	0	0	0	0	2	0	0	0	0	0	0	0	0	0	0	0	0	0	0	0	0	0	0	0	0	0	0	0	0	0	0	0	0	0	0
ENSG00000116273	43	42	48	32	44	32	71	67	70	62	68	69	62	52	48	27	43	56	21	24	29	13	27	24	19	36	21	16	31	42	11	10	70	118	109	83	92	95	91	59	48	61	36	46	45	61	0.382392	0.421264	0.432774
ENSG00000285701	2	2	0	0	2	0	1	0	0	2	0	0	5	0	3	0	2	2	4	1	10	3	8	0	1	0	0	0	0	0	0	0	0	0	0	0	0	0	0	3	4	9	0	4	0	2	0.0847737	0.095615	0
ENSG00000233623	0	0	0	0	0	0	0	0	1	0	0	2	0	0	0	0	0	0	0	4	0	4	2	2	1	2	2	2	1	0	0	0	0	0	0	0	0	0	0	0	0	0	0	0	0	0	0	0	0
ENSG00000162592	0	1	0	0	0	0	4	0	2	2	3	2	0	0	2	0	4	0	1	2	0	2	2	1	2	8	6	3	11	1	2	1	4	0	0	0	1	0	0	2	0	0	4	2	1	3	0	0.00859587	0
ENSG00000116254	2	0	0	0	0	0	2	0	0	0	0	3	0	0	2	3	0	0	2	3	4	2	7	6	0	4	3	0	4	10	0	0	0	0	0	0	0	0	0	6	4	0	1	2	2	2	0.0063996	0	0
ENSG00000049245	2828	2483	2903	2231	3021	2654	2490	2607	2560	2955	2961	2826	2184	2086	2836	2445	2713	2878	906	815	959	929	921	714	662	980	941	637	831	960	649	811	920	1016	950	968	991	870	901	671	893	912	669	830	861	979	33.4215	33.0969	34.7835
ENSG00000179743	166	193	165	149	179	143	171	155	149	138	162	176	65	87	81	76	108	108	454	453	486	432	489	296	261	392	341	257	361	411	260	247	233	221	220	238	281	204	180	597	739	768	614	656	662	729	2.16805	2.84305	2.18487
ENSG00000204624	2	0	1	2	1	4	0	0	0	0	0	0	0	6	6	5	0	8	0	8	4	5	2	0	1	4	4	6	5	0	4	0	0	0	0	0	0	0	0	0	0	0	0	2	0	0	0.0105552	0	0.00535074
ENSG00000284708	3	4	3	14	4	2	2	3	9	0	4	6	0	0	2	0	4	2	0	4	4	0	3	0	0	1	0	0	3	6	0	0	16	28	39	32	24	46	20	8	7	9	10	6	11	8	0.0462733	0.069588	0.0469148
ENSG00000171603	131	105	172	101	174	133	103	117	162	135	127	110	49	60	88	45	59	78	197	205	267	192	238	137	141	285	324	193	252	261	181	218	421	460	418	441	470	445	421	208	303	309	258	321	258	264	0.807315	0.729837	1.07468
ENSG00000280113	0	0	0	0	0	0	6	7	0	6	4	10	0	0	0	2	6	4	6	4	5	2	12	6	8	2	0	0	0	0	0	0	2	2	3	6	2	2	2	0	0	0	0	0	0	0	0	0	0
ENSG00000142606	3	3	0	1	3	2	2	2	2	2	2	3	2	0	2	7	1	4	0	0	0	0	0	0	0	0	0	1	0	0	0	0	0	0	0	0	0	0	0	0	2	0	0	0	0	0	0.0250378	0.0282398	0
ENSG00000177674	3378	3144	3399	2855	3694	3527	3583	3310	3488	3698	3859	3703	840	833	1080	936	1043	1087	299	323	352	320	342	214	189	830	759	551	867	840	482	489	622	575	588	559	691	417	440	432	534	445	444	457	383	488	44.8071	47.0364	45.7107
ENSG00000162572	16	20	11	9	14	15	0	4	0	0	5	2	12	15	13	8	10	19	27	34	15	33	25	25	21	28	31	14	20	18	12	13	11	10	5	2	4	14	7	30	54	57	33	63	49	72	0.128393	0.181015	0.0894937
ENSG00000171608	754	643	749	618	827	694	690	706	681	795	780	663	356	280	316	301	347	394	1354	1246	1464	1273	1321	836	854	1809	1732	1056	1763	1754	1029	1243	1770	1997	1939	2042	2202	1559	1570	1416	1920	1961	1420	1694	1721	1854	3.84546	3.69873	3.87291
ENSG00000225931	1	0	4	1	2	0	2	2	4	0	5	3	0	1	0	4	1	3	7	1	2	2	1	0	0	2	1	4	0	4	0	0	0	5	2	2	3	1	3	1	0	3	1	2	1	4	0.0249027	0	0.100992
ENSG00000171729	169	168	148	154	233	217	165	136	169	141	174	222	175	149	223	209	224	249	4	4	6	11	6	2	4	23	23	29	30	23	11	22	49	62	37	89	78	64	61	11	28	23	4	26	12	35	2.439	2.73464	2.16554
ENSG00000228150	16	15	15	23	10	14	31	24	31	25	31	35	13	10	11	7	14	23	8	17	17	17	11	5	19	13	11	7	19	22	19	8	9	11	20	15	19	19	20	25	41	40	21	34	20	42	1.1745	1.24191	1.11636
ENSG00000175262	4	0	2	0	1	2	1	0	1	0	0	0	0	0	0	0	0	0	0	1	0	0	2	0	2	1	6	0	2	2	0	4	0	0	0	0	1	0	0	2	1	1	0	2	2	5	0.0361587	0	0.01833
ENSG00000279457	83	74	81	105	142	93	68	75	76	81	108	75	36	33	67	67	59	68	34	22	50	60	56	25	30	51	25	31	52	53	40	29	41	45	39	54	55	50	28	59	79	44	32	62	58	74	1.91897	1.92968	1.89869
ENSG00000162571	3	2	0	0	0	0	0	0	0	0	2	0	0	0	0	0	0	1	7	2	9	3	1	2	3	0	3	2	9	3	0	1	1	2	1	1	0	0	2	0	0	2	0	0	0	0	0.0242362	0.0182238	0
ENSG00000231181	11	4	8	2	5	18	2	13	2	2	2	6	0	0	2	6	3	3	40	22	30	48	52	26	33	27	12	13	32	27	20	15	1	3	3	2	3	0	0	8	16	12	16	17	16	21	0.635575	0.260675	0.468645
ENSG00000238173	0	0	0	0	0	0	0	0	0	0	0	0	0	0	0	0	0	0	0	0	0	0	0	0	0	0	0	0	0	0	0	0	0	0	0	0	0	0	0	0	0	0	0	0	0	0	0	0	0
ENSG00000158109	365	324	354	371	396	377	302	355	314	397	412	346	242	229	289	251	238	288	259	324	297	281	324	180	176	297	263	196	252	274	191	206	295	290	240	243	245	241	204	323	373	464	306	366	376	435	4.91006	4.91591	4.8281
ENSG00000229393	0	0	0	0	0	0	1	4	2	2	4	1	0	0	0	0	0	0	1	0	0	0	0	0	0	0	0	0	0	0	0	0	1	1	0	0	1	0	0	0	0	0	0	1	0	0	0	0	0
ENSG00000269978	0	0	0	0	0	0	0	0	1	3	2	6	6	0	2	2	0	4	0	0	0	1	0	0	0	0	0	0	0	0	0	0	0	0	0	0	0	0	0	0	0	0	0	0	0	0	0	0	0
ENSG00000037637	1028	1008	1072	941	1170	1042	982	1004	1136	1139	1296	1160	308	354	393	413	445	445	1270	1380	1387	1263	1418	908	831	1776	1697	1077	1534	1578	978	1174	654	746	707	756	767	618	571	986	1414	1334	1096	1224	1202	1363	3.68555	4.07601	3.89658
ENSG00000184163	0	0	0	4	7	4	2	8	1	3	3	0	2	0	3	6	10	8	1	1	1	2	1	0	2	4	8	3	4	5	0	7	8	8	3	1	2	2	2	6	6	9	5	4	5	3	0	0	0
ENSG00000159423	24	12	8	16	33	20	36	28	40	16	42	23	33	25	20	28	30	30	6	6	6	4	13	0	3	10	13	14	18	22	13	1	5	13	10	10	10	11	9	36	44	39	32	36	29	39	0.213428	0.120361	0.072129
ENSG00000142599	358	258	360	260	341	370	328	298	325	388	372	347	189	135	202	230	260	223	347	352	363	323	356	245	206	347	297	230	337	291	181	168	406	459	412	500	460	449	413	343	450	497	376	420	426	514	0.819371	0.666012	0.835371
ENSG00000011021	444	413	397	401	516	487	555	582	623	577	690	615	223	232	285	307	269	327	360	379	396	326	369	259	273	390	446	259	341	413	254	258	376	434	410	362	448	336	386	359	394	441	339	402	426	476	1.75464	1.84085	1.59065
ENSG00000272482	3	4	2	2	2	2	0	0	0	0	1	0	4	0	2	4	2	0	3	3	1	0	2	0	6	1	0	2	4	0	4	6	2	2	2	2	2	2	1	0	0	0	0	1	1	2	0.280859	0.422369	0.189835
ENSG00000284747	5	2	12	3	11	9	15	13	29	13	16	17	3	3	5	5	5	2	9	11	9	4	10	5	9	11	10	4	14	9	4	8	23	24	31	32	24	29	29	24	30	22	37	33	35	25	0.0392356	0.0177013	0.095471
ENSG00000215912	7	2	9	6	5	6	12	19	11	4	8	14	20	5	8	18	21	5	12	1	11	6	13	8	1	4	9	2	9	15	2	12	20	10	20	11	20	11	3	18	29	36	28	32	30	61	0.0256514	0.00826624	0.0334376
ENSG00000120952	0	0	0	0	0	0	0	0	0	0	0	0	0	0	0	0	0	0	0	0	0	0	2	0	0	0	0	0	0	0	0	0	0	0	0	0	0	0	0	0	0	0	0	0	0	0	0	0	0
ENSG00000142615	2	3	3	3	0	1	8	3	6	1	6	3	0	0	0	0	1	0	0	2	1	2	1	0	3	2	0	0	0	4	2	0	0	0	0	0	0	2	0	0	1	0	0	0	0	0	0.0425264	0.0719473	0.0646739
ENSG00000215704	0	0	2	0	0	2	1	7	8	6	1	2	0	0	0	0	0	0	3	5	4	4	5	3	3	9	8	5	11	5	1	9	2	4	2	1	1	2	1	0	2	3	0	0	0	0	0	0	0.0451988
ENSG00000065526	3713	3249	3651	2993	3924	3581	3742	3739	4065	4348	4365	4186	1361	1361	1640	1493	1705	1829	2751	3042	3233	2693	3246	1920	1902	2775	2454	1612	2440	2541	1411	1467	3590	3810	3524	3548	3866	3519	3110	4090	5982	5606	4265	5055	5052	5738	8.36533	8.25605	8.33968
ENSG00000175756	1547	1451	1600	1274	1678	1436	1327	1285	1293	1467	1353	1422	421	386	503	483	521	586	264	353	305	274	281	175	182	676	635	399	544	631	399	439	790	876	842	968	946	791	640	515	722	694	600	610	583	654	29.9378	31.671	31.3927
ENSG00000229484	0	0	0	0	0	0	0	0	2	2	4	2	4	0	1	2	0	0	2	0	4	3	6	9	2	1	9	5	1	6	4	0	0	0	0	0	0	0	0	0	0	3	6	3	10	2	0	0	0
ENSG00000157916	3685	3490	3844	3175	4150	3895	2588	2503	2729	2794	2843	2699	3216	3066	4017	3421	3939	4218	810	843	978	749	864	573	492	1204	1035	707	1086	1101	701	770	1890	1937	1805	2077	2139	1666	1780	1916	2337	2331	1851	2035	2020	2394	20.9212	22.3481	22.1265
ENSG00000157881	151	175	197	177	208	217	138	157	177	153	158	150	94	101	119	86	87	113	25	39	33	32	51	9	24	93	101	41	85	106	53	37	223	257	289	281	270	186	222	149	229	191	152	194	153	205	0.961576	1.25693	1.2719
ENSG00000116213	303	257	309	288	288	262	347	348	362	409	436	389	96	106	142	112	139	144	88	96	120	109	116	63	72	134	104	69	114	105	65	89	182	233	161	212	248	144	189	234	304	326	289	283	322	301	1.28197	1.2264	1.32548
ENSG00000283611	0	2	0	0	0	0	0	0	0	0	0	0	0	0	0	0	0	0	0	0	0	0	0	0	0	2	0	2	2	0	0	0	0	0	0	0	0	0	0	5	5	1	7	3	3	2	0	0.164096	0
ENSG00000238290	0	0	0	0	0	0	0	0	0	0	4	0	0	0	0	0	0	0	0	0	0	0	0	0	0	0	0	0	1	0	0	2	0	0	0	0	0	0	0	0	0	0	0	0	0	0	0	0	0
ENSG00000225387	0	0	0	0	0	0	0	0	0	0	0	0	0	0	0	0	0	0	0	0	0	0	0	0	0	0	1	0	0	0	0	0	0	0	0	0	0	0	0	0	0	0	0	0	0	0	0	0	0
ENSG00000127463	491	441	468	376	528	469	426	409	451	478	496	462	371	370	428	451	458	490	527	496	515	532	587	306	311	479	502	360	459	491	301	351	352	401	392	404	469	391	379	596	680	714	538	669	674	664	1.6516	1.67312	1.59606
ENSG00000048707	610	559	641	520	659	692	543	497	566	535	596	579	292	281	367	303	347	370	908	945	1135	978	1182	679	660	1054	949	635	943	988	614	625	481	572	496	523	544	480	481	956	1297	1233	1003	1100	1078	1217	0.948683	0.980546	1.01072
ENSG00000158748	0	0	0	0	0	0	0	0	0	0	0	0	0	0	0	0	0	0	0	0	0	0	3	0	2	0	0	0	0	0	0	0	2	4	4	8	2	6	2	0	0	0	0	0	0	0	0	0	0
ENSG00000225196	2	0	2	0	0	0	0	0	0	0	0	0	0	0	0	0	0	0	4	0	2	2	0	1	0	0	0	0	0	0	0	0	0	0	0	0	0	0	0	0	0	0	0	0	0	0	0.204423	0	0.207257
ENSG00000130762	17	18	16	20	19	11	16	14	9	18	28	26	6	2	10	3	10	5	4	7	0	2	0	0	1	0	0	0	0	2	0	0	1	0	2	2	6	4	2	0	0	0	0	0	0	0	0.103133	0.123164	0.0984119
ENSG00000187144	28	22	11	20	26	28	12	28	21	35	22	28	17	5	25	13	14	32	50	38	42	35	28	17	23	66	46	32	34	39	28	30	47	46	44	40	46	41	31	17	44	46	37	49	35	50	0.200703	0.177862	0.0799405
ENSG00000162444	167	125	176	131	170	184	119	131	132	160	190	150	541	535	734	551	707	748	42	53	55	47	74	24	19	87	85	80	72	92	61	75	3	5	4	10	6	14	0	0	2	0	1	12	2	0	6.25742	5.28267	6.68607
ENSG00000279169	0	0	0	0	0	0	0	0	0	0	0	0	0	0	0	0	0	0	0	0	0	0	0	0	0	0	0	0	0	0	0	0	0	0	0	0	0	0	0	0	3	0	0	0	0	0	0	0	0
ENSG00000180758	364	295	354	264	352	324	363	342	371	437	389	375	165	168	173	177	190	218	62	92	76	82	68	52	43	113	62	69	65	93	70	59	30	32	28	42	30	36	28	75	116	99	69	115	99	119	2.21658	2.02614	2.18557
ENSG00000229010	0	0	0	0	0	0	5	6	0	4	0	1	0	0	0	0	0	0	1	4	6	1	2	0	3	15	4	4	8	5	7	1	4	8	1	9	11	7	17	0	0	0	2	3	4	1	0	0	0
ENSG00000184677	253	263	266	236	315	265	270	293	268	307	381	284	224	228	286	234	284	294	360	412	436	418	390	263	187	427	358	181	367	378	220	236	420	430	407	378	410	349	382	528	594	545	527	476	522	618	0.891219	1.04492	0.950004
ENSG00000230679	48	27	36	39	62	59	27	16	27	38	17	33	42	26	32	33	42	30	70	65	74	56	77	45	41	94	73	34	47	66	41	43	33	54	64	67	62	33	43	58	44	61	62	65	42	55	3.39987	2.157	2.58525
ENSG00000270136	0	0	0	0	0	0	0	3	0	0	2	0	0	0	0	0	0	0	0	0	0	0	0	0	0	0	3	0	1	0	0	0	0	0	0	0	0	0	0	0	2	2	0	0	0	3	0	0	0
ENSG00000132879	135	117	161	161	178	151	142	146	150	167	154	128	75	38	83	93	77	66	179	160	241	220	239	107	98	160	133	89	136	119	78	66	334	344	295	306	323	200	271	219	302	270	273	234	261	291	1.23627	1.20846	1.49481
ENSG00000187545	0	0	0	0	0	0	0	0	0	0	0	0	0	0	0	0	0	0	0	0	0	0	0	0	0	0	0	0	0	3	0	0	0	0	0	0	0	0	0	0	0	0	0	0	0	0	0	0	0
ENSG00000288398	50	42	53	40	58	55	72	67	85	74	71	73	8	22	18	8	13	8	59	64	47	47	43	16	28	41	35	38	45	53	23	33	34	50	51	78	68	43	33	81	107	112	58	86	84	112	0.606664	0.574767	0.651979
ENSG00000224621	1	0	0	1	0	1	0	0	2	0	0	0	1	1	1	0	2	0	0	0	0	0	0	0	0	0	0	0	0	0	0	0	0	0	0	0	0	0	0	0	0	0	0	0	0	0	0.0593727	0	0
ENSG00000224459	0	0	0	0	0	0	0	0	0	0	0	0	0	0	0	0	0	0	0	0	0	0	0	0	0	0	0	0	0	0	0	0	0	0	1	0	0	0	0	0	0	0	0	0	0	0	0	0	0
ENSG00000116731	2150	1986	2198	1640	2229	2130	2568	2261	2417	2662	2745	2548	2022	2139	2550	2463	2578	2894	6821	7002	7750	6689	7758	4986	4854	6781	5978	4323	6079	6440	3986	4146	2849	3303	3231	3186	3290	2916	2809	3799	5277	4675	3756	4383	4749	5273	6.35744	6.62351	6.58948
ENSG00000215785	0	0	0	0	0	0	0	0	0	0	0	0	0	0	0	0	0	0	2	0	0	0	0	0	2	0	0	0	2	2	0	0	0	0	0	0	0	0	0	0	0	0	0	0	0	0	0	0	0
ENSG00000131697	29	39	28	32	34	30	28	31	41	29	17	48	24	20	30	39	28	26	40	34	22	35	22	16	19	20	14	4	17	24	11	8	54	42	51	56	52	34	35	25	43	39	32	29	36	54	0.0711373	0.107902	0.0696365
ENSG00000225952	0	0	0	0	0	0	0	0	0	0	0	0	4	0	2	0	0	0	0	0	0	0	0	0	0	0	0	0	0	0	0	0	0	0	0	0	0	0	0	0	0	0	0	0	0	0	0	0	0
ENSG00000280222	0	0	0	0	0	0	1	0	0	0	0	0	0	0	0	0	0	2	3	3	3	0	2	0	3	0	0	0	0	0	0	0	0	0	0	0	0	0	0	0	0	0	0	0	0	0	0	0	0
ENSG00000088280	8	10	9	11	6	6	15	2	18	26	15	16	1	0	1	3	4	2	1	1	0	0	0	0	0	7	4	8	4	14	4	2	0	0	1	0	0	2	0	6	10	7	6	14	16	14	0.0518024	0.0730339	0.0590856
ENSG00000188807	16	40	26	32	38	31	18	23	26	37	34	35	15	25	29	16	18	15	35	23	26	23	34	11	10	10	5	6	24	16	9	6	33	56	48	53	40	48	34	24	53	15	21	28	16	15	0.0740267	0.208734	0.121961
ENSG00000284693	1	2	0	2	2	2	6	8	2	7	4	6	0	0	0	1	0	0	0	0	0	2	0	2	0	2	0	2	7	3	0	2	0	0	5	0	2	3	4	0	2	0	2	1	0	0	0.0123137	0.0277768	0
ENSG00000232298	0	0	4	0	0	0	3	0	0	1	2	0	0	0	0	0	0	0	0	0	0	0	0	0	0	0	0	0	0	0	0	0	0	0	0	0	0	0	0	0	0	0	0	0	0	0	0	0	0.153021
ENSG00000227634	0	0	2	0	2	0	1	1	0	0	3	0	0	0	0	0	0	2	0	0	0	0	0	0	0	0	0	0	0	0	0	0	0	0	0	0	0	0	0	0	0	0	0	0	0	0	0	0	0.0654277
ENSG00000225315	0	0	0	0	0	0	0	0	0	0	0	0	0	0	0	0	0	0	0	0	1	0	0	0	0	0	0	0	0	0	0	0	0	0	0	0	0	0	0	0	0	0	0	0	0	0	0	0	0
ENSG00000198793	511	505	559	446	593	522	566	481	570	582	590	555	432	372	521	391	457	523	589	624	676	571	754	458	468	792	720	429	630	789	431	460	788	786	718	721	860	650	668	773	1188	1082	921	933	1008	996	1.35696	1.51252	1.505
ENSG00000078900	16	4	6	9	6	1	9	4	3	4	2	4	4	2	6	4	2	10	0	0	2	1	2	0	0	18	12	7	12	8	8	7	5	9	2	9	8	0	2	2	8	4	2	6	0	4	0.0763677	0.0215335	0.0290349
ENSG00000142661	0	0	0	0	0	0	0	0	0	0	0	0	1	0	0	0	0	0	1	1	1	1	0	0	0	2	0	0	0	0	1	2	0	0	0	0	0	2	0	0	0	0	0	0	0	0	0	0	0
ENSG00000171819	2	1	6	6	0	3	1	0	4	7	1	0	0	0	0	0	1	3	9	8	12	18	16	2	4	9	5	2	10	11	5	6	2	4	2	0	2	3	3	7	7	9	9	6	9	10	0.0290457	0.0163801	0.088345
ENSG00000229162	0	4	1	3	1	0	0	0	2	0	0	0	4	0	0	0	2	0	8	5	1	7	5	0	1	7	4	2	4	9	4	4	1	0	0	3	4	2	0	6	3	8	2	4	3	3	0	0.177704	0.0399348
ENSG00000197921	0	0	0	1	0	0	0	0	0	0	0	2	0	0	0	1	0	1	0	0	0	0	0	0	0	0	0	0	2	2	0	2	2	3	0	1	0	0	0	0	0	0	0	3	2	0	0	0	0
ENSG00000233755	16	19	14	12	14	8	10	16	2	4	2	12	4	8	12	12	5	10	0	2	0	0	0	0	0	12	5	1	10	6	3	1	0	0	0	0	0	0	0	6	2	4	4	6	0	0	0.598818	0.802036	0.53123
ENSG00000116288	14503	12879	13881	11611	14791	14212	11587	11038	12086	12959	12833	12016	15173	14245	18344	16309	18322	20012	5926	6048	6555	5842	6414	4169	4022	6704	6337	4551	6575	6415	4230	4828	11027	11984	11336	12130	12424	10413	10504	10412	14517	14086	11325	12734	13420	14909	195.423	195.733	189.635
ENSG00000238164	90	93	107	73	115	81	79	87	91	112	112	107	98	94	108	94	87	91	23	43	13	19	22	9	11	25	27	26	19	22	15	15	50	51	70	42	56	40	52	112	119	117	100	129	103	150	0.473666	0.552049	0.570944
ENSG00000233929	32	21	21	20	38	17	24	15	23	34	18	46	15	15	14	16	16	25	80	82	105	59	80	48	38	123	113	62	78	83	57	49	74	103	81	107	81	79	64	47	54	66	57	57	86	80	5.55678	4.11299	3.69719
ENSG00000271742	0	0	3	2	0	4	0	0	0	0	0	0	0	0	0	0	0	0	3	0	3	0	1	0	1	4	0	0	0	0	0	0	0	0	0	2	4	0	0	0	0	0	0	0	0	2	0	0	0.383749
ENSG00000142677	4	12	10	4	8	4	0	0	0	0	0	0	0	0	0	0	0	0	0	0	1	1	0	0	1	0	1	0	0	2	0	1	0	4	2	0	2	2	2	0	0	0	0	0	0	0	0.0458626	0.155183	0.116246
ENSG00000131910	2	2	0	4	2	12	2	5	2	5	2	2	0	0	0	0	0	0	0	0	0	0	0	0	0	0	3	0	2	2	0	0	2	16	17	18	5	9	6	0	0	0	0	0	0	0	0.0554485	0.0625396	0
ENSG00000185436	259	250	254	225	267	237	266	266	271	275	365	287	171	154	195	166	203	175	49	49	39	42	53	24	28	77	68	49	83	100	37	68	30	42	25	43	32	34	28	41	72	55	51	54	71	68	1.6934	1.84359	1.68373
ENSG00000131914	0	0	0	0	2	0	3	0	0	1	2	0	1	1	0	0	3	0	0	0	0	2	0	0	0	0	0	0	1	0	0	0	0	0	0	0	0	0	0	2	7	2	5	4	3	6	0	0	0
ENSG00000226396	45	38	31	15	31	27	26	64	66	53	31	31	28	25	38	24	37	45	19	38	41	33	57	14	31	45	46	45	51	46	21	38	22	21	16	16	18	20	8	39	82	83	31	87	39	71	3.19438	3.04245	2.23108
ENSG00000169504	5158	4618	5004	4044	5540	5029	4771	4471	5025	5121	5244	4828	4593	4723	6022	5061	5649	6346	1202	1111	1295	1194	1467	888	818	2443	2228	1452	2342	2286	1540	1795	948	1059	911	1005	1120	966	927	1027	1412	1390	1125	1279	1350	1535	37.2951	37.6607	36.6832
ENSG00000225159	41	16	46	29	54	45	17	30	30	45	41	49	23	39	69	54	49	63	44	52	46	49	60	32	56	125	126	72	151	148	72	104	37	56	34	55	55	67	48	54	70	80	76	51	69	59	1.52739	0.672282	1.73742
ENSG00000260063	9	6	9	7	3	6	6	4	4	5	4	2	2	2	0	6	0	2	6	18	8	2	12	9	9	21	11	10	20	30	10	7	9	5	7	4	5	4	2	4	10	21	13	14	13	5	0.145344	0.109288	0.147359
ENSG00000272088	0	0	0	0	0	0	0	0	0	0	0	0	0	0	0	0	0	0	0	0	0	0	0	0	0	0	0	0	0	0	0	0	0	0	2	0	0	0	0	0	0	2	0	4	2	0	0	0	0
ENSG00000270728	14	5	13	5	14	9	26	18	26	9	24	15	0	10	3	6	7	11	22	19	23	28	20	14	15	54	38	26	47	58	28	18	4	13	7	11	4	4	8	31	45	41	20	23	27	39	0.861301	0.346946	0.810867
ENSG00000169641	438	402	492	387	525	378	431	385	444	493	441	407	363	310	324	332	311	400	255	263	331	292	251	207	188	300	295	191	301	267	117	230	647	619	627	683	708	635	556	222	356	362	299	319	363	396	1.46478	1.51632	1.66818
ENSG00000181773	24	8	16	18	19	27	40	44	46	39	50	43	3	8	9	7	7	10	11	6	11	16	15	2	14	17	14	11	8	13	7	20	12	32	19	21	23	24	15	2	14	7	8	3	2	9	0.362738	0.136375	0.245178
ENSG00000175707	20	9	22	16	20	28	15	6	16	8	4	13	3	0	6	8	1	5	9	9	13	9	12	8	9	36	40	25	36	30	26	33	40	45	24	18	32	28	13	19	32	26	29	28	16	49	0.348235	0.176746	0.388369
ENSG00000241547	69	51	36	38	56	45	43	31	45	28	45	32	22	16	23	15	9	20	45	31	40	37	46	28	33	37	42	18	35	24	16	12	97	111	109	96	123	67	104	22	75	60	37	55	46	73	4.762	3.96986	2.51897
ENSG00000224129	0	0	0	0	0	0	0	0	0	0	0	0	0	0	0	0	0	0	2	3	0	1	5	0	0	2	0	0	2	2	0	0	0	0	0	0	0	0	0	2	8	4	1	3	2	3	0	0	0
ENSG00000230228	2	0	6	2	9	8	0	0	0	0	0	1	0	0	0	0	0	0	0	0	0	1	0	0	0	0	0	0	0	0	0	0	7	0	2	11	10	0	4	1	2	1	0	4	2	1	0.175537	0	0.533911
ENSG00000237436	0	2	4	6	6	2	2	3	1	2	2	0	6	5	10	5	10	5	4	5	4	2	1	2	0	8	10	7	16	9	5	2	0	0	0	2	0	1	4	4	3	0	0	0	2	3	0	0.175563	0.315629
ENSG00000233954	146	119	145	120	170	122	121	100	146	150	130	118	206	173	274	218	271	306	64	57	70	54	85	43	44	67	51	28	38	71	38	63	136	130	153	113	114	115	109	63	72	93	72	97	105	104	2.16313	1.98857	2.1781
ENSG00000174950	0	0	0	0	0	1	0	0	0	0	0	0	2	0	2	0	0	1	0	0	0	0	0	0	0	0	0	0	0	0	0	0	0	0	0	0	0	0	0	0	0	0	0	0	0	0	0	0	0
ENSG00000055070	2376	2029	2406	1899	2434	2291	1825	1683	1811	1847	1950	1891	2087	2101	2426	2295	2549	2633	532	543	564	556	652	367	332	837	760	588	781	794	444	480	2065	2237	2036	2245	2298	1761	1754	724	961	1039	797	824	821	980	16.1834	15.5873	16.615
ENSG00000225891	12	12	17	11	12	13	35	28	26	33	20	41	10	4	4	18	14	8	38	45	43	44	41	31	37	56	35	50	39	50	31	25	14	24	12	17	16	12	8	27	48	40	45	42	22	38	0.307363	0.346671	0.441468
ENSG00000175087	1039	993	1139	863	1190	1163	834	844	923	901	931	847	686	760	1021	767	920	907	629	732	776	649	767	579	498	650	529	368	491	519	364	398	991	988	898	983	1090	1023	1051	810	1111	1009	783	997	1033	1234	7.3593	7.93296	8.17946
ENSG00000171735	3203	2839	3232	2718	3431	3147	2370	2440	2587	2923	2702	2679	3898	3587	4727	4055	4636	4976	2515	2617	2782	2649	2850	1757	1755	3426	3125	2101	3100	3268	1932	2353	3726	4192	3792	3863	4124	3546	3536	1889	2621	2682	1962	2390	2210	2676	10.4466	10.4436	10.6874
ENSG00000157191	1648	1509	1643	1318	1740	1670	1800	1561	1691	1899	1920	1821	713	662	837	777	887	1001	1289	1360	1563	1297	1504	872	823	1859	1907	1306	1860	1984	1224	1311	1270	1464	1372	1468	1504	1272	1193	1194	1648	1507	1180	1396	1414	1657	9.66032	9.97674	9.76453
ENSG00000270733	0	0	0	0	0	0	0	0	3	0	0	2	0	0	0	0	0	0	2	0	0	0	2	1	0	3	3	0	2	0	2	2	2	1	2	0	0	0	0	0	0	0	0	0	0	0	0	0	0
ENSG00000284699	1	0	0	0	0	0	0	0	0	0	0	0	0	1	0	0	2	0	4	2	4	1	6	0	0	2	0	0	0	0	0	0	2	0	0	0	0	1	0	0	0	0	0	0	0	0	0.0364546	0	0
ENSG00000133226	2843	2468	2750	2379	2918	2737	3140	3007	3246	3463	3658	3320	1996	1868	2388	2034	2252	2595	4668	4557	5236	4398	5167	3286	3376	5454	5135	3384	5189	5339	3531	3974	3177	3383	3296	3516	3483	3069	3225	4092	5424	5230	4274	4980	5349	5947	11.5912	11.3491	11.3675
ENSG00000162482	1	4	1	8	5	3	7	13	12	6	16	11	3	5	5	2	4	0	6	7	6	6	4	2	0	4	0	2	0	2	6	6	0	1	0	0	0	0	0	0	5	2	6	0	4	2	0.0265833	0.119932	0.0269519
ENSG00000230035	0	0	0	0	0	0	0	0	0	0	0	0	0	0	0	0	0	0	0	0	0	0	1	0	0	0	0	0	0	0	0	0	0	0	0	0	0	0	0	0	0	0	0	0	0	0	0	0	0
ENSG00000235185	2	0	2	1	3	3	3	2	5	1	0	1	0	0	0	4	0	2	10	11	3	13	7	6	10	5	10	8	3	13	2	0	0	1	1	2	3	0	2	3	1	0	3	1	0	2	0.312065	0	0.316392
ENSG00000236782	1	0	0	0	0	1	0	2	0	1	0	0	0	0	0	0	0	0	0	0	0	0	0	0	0	0	1	0	0	0	0	2	2	8	2	3	3	2	5	0	3	0	0	1	0	0	0.0155807	0	0
ENSG00000215910	0	0	0	0	0	0	0	0	0	0	0	0	0	0	0	0	0	0	0	1	0	0	0	0	1	1	0	2	2	0	0	0	0	0	0	0	0	0	0	0	0	0	0	0	0	0	0	0	0
ENSG00000116663	2720	2330	2622	2237	2864	2650	2293	2110	2449	2526	2623	2493	722	658	835	758	867	949	188	206	226	262	226	100	113	584	628	465	667	593	362	422	607	699	588	664	709	575	577	254	283	294	213	351	215	291	50.6355	48.9223	49.4879
ENSG00000225643	18	11	25	16	21	9	24	16	15	15	13	12	21	21	7	16	21	27	21	6	20	21	17	10	6	16	17	13	11	17	12	10	35	30	34	53	33	36	26	8	12	13	9	8	14	14	1.20368	0.829653	1.69496
ENSG00000243659	20	14	12	20	25	16	49	45	46	49	60	57	9	16	14	21	23	28	30	51	32	25	35	24	27	20	25	19	26	34	28	14	34	34	39	51	53	30	22	68	92	88	76	97	48	110	2.29069	1.80855	1.39347
ENSG00000240553	0	0	0	0	0	0	0	0	0	0	0	0	0	0	2	0	0	0	0	0	0	0	0	0	0	0	0	0	0	0	0	0	0	0	0	0	1	0	1	0	2	0	0	0	0	2	0	0	0
ENSG00000228943	0	0	0	0	0	0	0	0	0	0	0	0	0	0	0	0	0	0	9	6	4	7	9	10	3	5	8	2	4	2	1	0	0	0	0	2	1	0	2	0	0	0	0	0	0	0	0	0	0
ENSG00000188822	45	78	85	53	79	86	103	131	93	165	126	116	36	66	89	65	68	71	365	426	416	433	443	232	204	375	326	218	294	312	189	179	400	404	369	344	393	341	246	500	626	619	532	607	574	700	0.276058	0.539693	0.528672
ENSG00000090273	3997	3566	3894	3218	4225	3720	3553	3147	3277	3675	3718	3513	1699	1549	2168	1946	2167	2261	1270	1288	1502	1404	1455	833	853	1974	1847	1290	1826	1875	1162	1235	3327	3670	3579	3738	3821	3082	3105	2963	3890	3887	2958	3459	3461	3983	45.3294	45.6134	44.7735
ENSG00000227868	2	3	7	4	2	2	0	0	0	1	0	0	2	4	5	2	0	0	0	0	0	0	0	0	0	0	0	1	0	0	0	0	0	0	0	0	0	0	0	2	0	2	0	2	4	4	0.0978751	0.165588	0.347312
ENSG00000269925	0	0	0	0	0	0	4	4	1	0	3	3	0	0	0	0	0	0	2	0	6	1	2	0	0	6	3	1	2	1	2	5	0	0	2	0	0	0	0	1	4	16	2	4	6	6	0	0	0
ENSG00000142751	689	496	653	526	638	510	560	463	483	488	529	498	343	351	381	341	360	446	286	234	218	316	261	134	126	297	270	184	321	300	193	207	352	327	367	317	301	256	251	265	349	341	252	281	248	299	4.48124	3.63853	4.30598
ENSG00000189266	22448	19589	21949	17947	24192	21327	19232	18623	19262	19848	21972	20404	18607	18320	22995	20344	22221	23671	10316	10602	11437	10244	11758	7954	7698	14315	13151	8776	12410	13635	9248	10204	16559	18362	16869	18157	18968	17432	16867	15214	20658	19284	15713	18628	20656	22867	262.411	258.275	260.135
ENSG00000162511	12820	11076	12401	10089	13026	11996	12128	11699	12611	12912	13216	12628	7769	7582	9503	8087	9305	10119	4970	5277	5489	5168	5946	3402	3109	8452	7936	5540	7872	8156	4723	5258	4609	5261	5025	5151	5346	4200	3921	3806	4908	4917	3859	4315	4277	4812	128.275	124.997	125.802
ENSG00000158014	0	0	0	0	0	0	2	0	0	0	0	0	0	0	0	0	0	0	2	0	0	0	0	0	0	0	0	0	0	0	0	0	0	0	0	0	0	0	0	0	0	0	3	0	0	0	0	0	0
ENSG00000204138	1231	1091	1207	1013	1303	1207	1385	1246	1416	1505	1464	1485	696	662	904	798	943	873	1614	1590	2039	1700	2041	1209	1053	1887	1797	1111	1736	1728	1151	1223	1584	1640	1513	1716	1670	1486	1549	1245	1658	1616	1312	1370	1526	1581	5.43389	5.43178	5.40182
ENSG00000233419	0	0	0	0	0	0	0	0	0	0	0	0	0	0	0	0	0	0	0	0	2	0	0	0	0	0	0	0	0	0	0	0	0	0	0	0	0	0	0	0	0	0	0	0	0	0	0	0	0
ENSG00000229106	0	0	1	0	0	0	0	2	1	0	0	0	0	0	1	0	0	2	3	4	7	5	6	3	1	2	0	0	0	0	0	0	0	0	0	0	0	0	0	3	9	4	5	0	2	2	0	0	0.0258457
ENSG00000236155	4	4	4	10	4	5	12	1	3	4	0	6	1	4	9	6	0	7	0	0	0	0	0	0	2	0	0	0	0	1	0	0	0	0	2	0	2	0	0	1	1	2	0	1	4	1	0.0404873	0.0456651	0.0410486
ENSG00000142675	11	9	28	13	31	40	8	5	19	9	5	6	0	4	1	2	0	4	10	23	17	13	16	10	8	15	16	2	17	18	6	6	19	45	31	19	32	29	32	22	18	38	27	27	21	41	0.0897188	0.0827939	0.231541
ENSG00000197245	0	0	0	0	0	2	0	0	0	0	0	0	0	2	2	5	0	0	2	0	0	0	4	0	3	8	0	2	0	0	2	4	0	0	0	0	0	0	0	0	0	2	0	2	0	0	0	0	0
ENSG00000261025	5	4	1	5	1	5	0	4	6	0	4	3	5	1	1	1	0	2	0	0	0	0	0	0	0	12	9	7	9	8	3	0	0	0	0	0	0	0	0	4	0	3	10	5	3	5	0.0661047	0.0596468	0.0134042
ENSG00000116237	223	186	251	258	273	265	250	259	289	334	319	292	194	192	182	136	180	204	41	30	51	34	47	28	28	70	66	42	50	81	31	36	237	246	223	301	247	239	260	103	164	130	100	143	134	123	1.46693	1.38001	1.67401
ENSG00000158195	2029	1694	1974	1616	2043	1943	1982	1864	1993	2244	2181	2132	1288	1256	1567	1408	1612	1639	1756	1749	2064	1753	2024	1231	1032	2306	2080	1471	2060	2106	1329	1360	1871	2021	1854	2046	2085	1665	1658	1723	2264	2233	1928	2074	2147	2302	11.5357	10.8627	11.3786
ENSG00000130772	234	214	291	201	301	207	285	261	318	274	272	246	191	169	195	182	211	237	43	49	53	42	51	36	29	108	79	57	75	84	60	56	181	241	192	197	203	179	168	168	190	197	171	160	149	209	3.74711	3.86508	4.72447
ENSG00000215899	2	2	0	0	0	0	8	1	2	6	2	2	0	0	0	0	0	0	0	0	0	0	0	0	0	0	0	0	0	0	0	0	0	0	0	0	0	0	0	0	0	0	0	0	0	0	0.0481353	0.0542911	0
ENSG00000237429	5	6	4	2	4	4	10	4	4	2	4	12	1	1	3	6	0	2	27	17	17	19	21	10	17	40	35	16	23	13	12	10	16	10	14	16	13	9	9	45	43	60	48	50	50	69	0.57065	0.772353	0.462849
ENSG00000271398	0	1	3	6	2	1	2	0	0	1	0	0	0	0	0	0	0	0	0	1	1	0	1	1	2	0	0	0	1	0	0	0	1	0	5	0	2	3	1	0	1	4	0	1	1	0	0	0.085716	0.231152
ENSG00000240731	13	4	14	16	16	10	32	28	17	20	21	23	2	2	4	0	11	6	10	11	7	8	12	12	4	5	14	8	23	19	7	5	15	18	16	15	25	25	21	36	55	63	49	28	43	70	1.08778	0.377506	1.1877
ENSG00000172746	0	0	0	0	1	0	0	0	0	0	0	0	0	0	0	0	0	0	0	0	0	0	0	0	0	0	0	0	0	0	0	0	0	1	3	0	0	0	0	0	0	0	0	1	1	0	0	0	0
ENSG00000284676	0	0	0	0	0	0	0	0	0	0	0	0	0	0	0	0	0	0	2	1	0	0	2	0	0	0	0	0	0	0	0	0	0	0	0	0	0	0	0	0	0	0	0	0	0	0	0	0	0
ENSG00000204160	211	198	229	172	226	223	264	240	232	255	274	223	99	115	128	124	120	116	341	330	377	365	377	197	211	480	434	270	383	437	222	287	275	282	266	300	277	216	238	164	214	230	175	213	178	233	1.24818	1.32106	1.37344
ENSG00000233399	0	0	0	0	0	0	0	0	0	0	0	0	0	0	0	0	0	0	0	2	1	0	2	0	0	1	5	0	0	0	0	0	0	0	0	0	0	0	0	0	0	0	0	0	0	0	0	0	0
ENSG00000090020	155	171	171	117	195	164	149	142	163	169	157	144	160	129	199	138	202	193	32	28	50	29	47	24	26	75	53	23	59	51	32	22	83	90	92	95	95	105	83	60	61	59	51	56	61	56	0.808121	1.00555	0.9039
ENSG00000225990	0	0	0	0	0	0	0	0	0	0	2	0	0	0	0	0	0	0	0	0	0	0	0	0	0	0	0	0	0	0	0	0	0	0	0	0	0	0	0	0	0	0	0	0	0	0	0	0	0
ENSG00000157978	148	125	136	96	183	140	153	114	130	131	138	127	67	65	88	103	114	119	175	221	203	191	204	121	118	206	204	142	217	199	114	132	365	350	369	424	415	327	329	396	502	562	458	468	480	574	0.890005	0.847824	0.829181
ENSG00000226944	0	0	1	0	2	0	0	0	0	0	2	0	1	0	0	0	0	2	0	3	3	0	0	0	0	4	0	0	0	0	2	2	3	2	1	6	3	6	0	0	2	0	4	3	2	3	0	0	0.0866311
ENSG00000158246	0	0	0	0	0	0	2	0	0	0	2	0	0	0	0	0	0	0	0	0	0	2	0	0	0	0	0	0	0	0	0	0	0	0	0	2	2	0	0	0	0	0	0	0	0	2	0	0	0
ENSG00000270282	0	9	0	7	1	7	2	5	0	0	0	3	0	2	8	2	0	4	2	2	2	3	0	0	2	1	7	2	3	4	5	4	8	2	9	6	3	3	5	1	7	2	4	5	2	3	0	0.888519	0
ENSG00000130770	5357	4352	5003	4258	5594	4993	4398	4504	4842	5142	5106	4671	5510	5252	6864	5954	6575	7072	2043	2103	2241	2153	2408	1391	1358	2331	1999	1556	2090	2224	1336	1584	4398	5138	4746	4780	5155	4004	4037	3358	4610	4579	3299	4072	3877	4153	77.7638	71.2541	73.6319
ENSG00000117305	4433	3698	4291	3477	4719	4252	3861	3703	4006	4268	4254	4004	2136	1991	2660	2209	2429	2628	1031	1038	1069	961	1028	592	660	995	964	615	893	896	480	626	1034	1055	995	1110	1160	978	830	1630	2141	2128	1684	1927	1989	2143	25.4407	23.9367	24.9672
ENSG00000229044	5	1	0	3	6	2	1	2	0	5	1	0	1	1	4	0	3	1	6	3	4	2	7	2	4	11	4	3	9	11	2	5	0	2	0	2	0	0	0	0	6	0	2	0	4	2	0.367868	0.0829825	0
ENSG00000162512	8	12	12	4	12	8	14	11	3	15	18	13	38	8	16	19	25	16	2	0	0	0	0	0	0	0	0	0	0	0	0	0	4	7	7	2	4	3	4	6	9	9	1	12	5	4	0.0365733	0.0618757	0.0556205
ENSG00000179840	35	4	15	24	32	29	26	14	30	27	42	14	7	5	7	15	18	7	43	47	51	41	56	42	20	61	55	35	60	54	45	34	44	40	40	30	42	29	20	113	152	120	102	125	152	154	0.620108	0.0799326	0.269445
ENSG00000272449	16	7	15	6	4	6	10	3	6	7	2	7	12	3	2	0	0	4	11	4	0	3	5	0	1	4	5	3	6	0	6	2	5	6	5	3	12	0	1	6	4	7	4	2	0	5	0.337544	0.166561	0.320835
ENSG00000214973	16	14	13	13	18	14	18	17	7	19	17	19	23	13	17	15	12	27	7	2	3	2	4	1	0	7	8	5	5	10	7	2	16	15	6	20	11	10	8	4	7	10	8	7	12	10	0.807469	0.796891	0.665164
ENSG00000198746	208	198	176	162	194	167	210	200	213	244	239	272	57	38	48	37	43	49	84	118	91	111	121	70	41	158	174	85	148	178	103	106	62	114	140	121	110	98	97	106	178	160	130	139	160	146	3.01803	3.24034	2.58913
ENSG00000158006	388	345	371	327	447	353	374	371	394	427	383	337	272	199	316	286	248	294	333	382	510	344	463	313	260	474	433	313	420	408	244	269	291	361	303	299	315	283	252	326	457	520	384	386	403	524	3.30222	3.31175	3.20131
ENSG00000188529	13230	12028	13255	11040	14475	13102	11823	11643	12498	13196	13567	12717	9281	9414	11572	10467	11306	12513	12684	12924	14452	12572	14374	9310	8773	16211	14901	9759	14587	14977	10225	11060	19003	21336	19840	20618	22100	19502	18907	11502	15511	15013	11985	14038	14897	16747	36.0297	36.9453	36.5983
ENSG00000214812	4	4	1	0	9	1	0	4	1	3	3	2	1	0	0	0	2	2	10	2	3	2	1	1	1	10	7	2	11	8	6	4	6	0	0	6	0	1	2	0	0	0	1	0	0	0	0.231948	0.261611	0.0587909
ENSG00000142784	83	77	56	78	63	98	86	60	87	78	97	88	70	55	35	36	43	56	74	68	46	56	66	44	53	74	87	60	70	70	50	53	44	47	47	49	58	27	23	101	86	106	80	128	106	90	0.453527	0.474548	0.310236
ENSG00000230023	0	0	1	0	2	0	2	0	2	3	1	0	4	1	4	2	7	7	0	0	0	0	0	0	0	0	0	0	0	0	0	0	0	0	0	0	0	0	0	0	0	0	0	0	0	0	0	0	0.0177104
ENSG00000227950	0	0	0	0	0	0	0	0	0	0	0	2	0	0	0	0	0	0	0	0	0	0	0	0	0	0	0	0	0	0	0	0	1	0	0	3	0	0	2	0	0	0	0	0	0	0	0	0	0
ENSG00000117682	1178	996	1137	859	1195	1117	1034	1043	1055	1183	1332	1202	800	763	969	884	895	1027	384	342	388	373	428	240	195	430	490	330	435	473	258	333	540	654	587	638	633	519	476	696	843	788	685	709	783	860	6.78458	6.46997	6.63923
ENSG00000175793	0	0	1	3	0	3	2	7	0	0	2	4	0	0	0	0	0	0	5	4	0	1	10	2	0	1	0	0	2	4	4	4	0	2	0	1	0	1	6	2	4	7	0	0	2	2	0	0	0.0250356
ENSG00000126698	15902	14151	15944	12868	17218	15533	12797	12557	13097	14129	14758	13774	12106	11613	14712	13046	14440	15467	7058	6941	7886	6732	7487	4722	4653	8572	7786	5279	7435	7800	5006	5443	14314	15988	15037	15901	16562	14121	13757	10773	14476	13930	11182	12459	13251	14996	177.599	178.254	180.536
ENSG00000229447	309	285	306	221	369	305	368	301	352	400	402	349	299	310	384	321	396	441	1951	2027	2295	1961	2241	1374	1212	1432	1354	930	1365	1344	797	679	277	336	323	353	365	313	239	935	1265	1275	1049	1204	1201	1259	22.8383	23.7582	22.9301
ENSG00000229607	0	0	0	0	0	0	1	0	0	0	1	0	0	0	0	0	0	0	0	0	0	0	0	0	0	0	0	0	0	0	0	0	0	0	0	0	0	0	0	0	0	0	0	0	0	0	0	0	0
ENSG00000229994	13	13	24	11	29	17	12	10	12	9	6	6	23	23	24	17	15	21	36	44	33	21	35	24	26	28	33	19	23	29	5	10	33	44	47	32	46	33	46	24	32	25	18	32	49	41	0.47391	0.534516	0.88704
ENSG00000130766	246	160	171	128	179	193	204	204	217	222	303	187	106	110	186	146	165	182	40	37	34	19	55	32	25	34	44	41	32	42	26	30	47	42	58	78	58	35	73	51	56	85	50	78	47	64	2.29506	1.68362	1.61746
ENSG00000168528	67	58	85	78	75	75	79	64	72	102	109	98	24	24	12	20	29	14	0	0	0	2	0	0	0	2	0	0	0	2	6	0	0	0	1	1	0	3	1	0	0	0	0	0	0	0	0.626888	0.61208	0.806332
ENSG00000196581	0	0	0	0	0	0	2	4	2	6	6	2	0	0	0	0	0	0	4	0	0	0	2	0	2	4	10	8	6	4	2	0	6	15	21	18	8	8	14	2	0	2	4	6	7	2	0	0	0
ENSG00000169403	4021	3425	3980	3219	4213	3788	3539	3424	3756	3926	4156	3727	2068	1949	2334	2245	2376	2701	666	633	853	636	783	437	374	1035	864	616	867	964	503	546	788	978	920	889	1009	794	731	274	447	369	311	403	367	403	30.8634	29.6507	30.9723
ENSG00000117676	1113	1022	1123	925	1189	1183	1103	1032	1171	1245	1233	1145	644	663	893	692	1015	950	255	223	273	209	248	142	117	281	210	153	217	279	151	145	792	893	748	786	912	696	720	572	776	796	622	716	689	795	6.10954	6.32745	6.24989
ENSG00000198830	15607	13717	15834	12831	17085	15241	13573	12987	13179	14170	14494	14126	23503	22352	29896	25839	28150	31277	20913	21111	23460	20990	23472	15866	15256	20890	18789	12882	18138	19327	13104	14850	12072	13469	12649	13293	14404	12710	12405	17891	24090	22606	19178	21998	24627	27337	158.071	156.695	162.593
ENSG00000084628	0	0	0	0	0	0	0	0	0	0	0	0	0	0	0	0	0	0	0	0	0	0	0	0	0	0	0	0	0	0	0	0	0	0	0	0	0	0	0	0	0	0	0	0	0	0	0	0	0
ENSG00000060688	3654	3164	3584	2865	3843	3506	2975	2805	3000	3122	3287	3028	2569	2509	3357	2822	3208	3454	1888	1924	2118	1918	2114	1343	1185	2320	2173	1412	2134	2163	1407	1612	3710	3822	3755	3867	4246	3628	3495	2920	3832	3820	3273	3411	3467	4034	30.3627	29.6533	30.1939
ENSG00000171612	144	149	184	157	171	143	156	110	182	169	209	162	249	244	268	253	291	293	60	84	92	80	99	35	57	123	85	65	60	76	40	63	112	120	133	164	159	150	110	90	123	74	111	145	115	132	1.20337	1.40439	1.55896
ENSG00000241169	10	7	14	3	18	2	11	13	12	26	6	21	4	1	2	0	2	4	39	17	15	30	23	12	14	27	37	23	39	50	22	20	10	2	21	14	21	13	13	2	24	9	8	9	18	20	0.754644	0.595806	1.07115
ENSG00000278572	0	0	0	0	0	0	0	0	0	0	0	0	0	0	0	1	0	0	0	0	0	0	0	0	0	0	0	0	0	2	0	0	0	0	0	0	0	0	0	0	0	0	0	0	0	0	0	0	0
ENSG00000227001	1	0	0	2	0	2	8	2	1	7	2	3	0	0	0	0	0	0	1	4	2	2	4	0	0	9	4	1	3	0	0	0	9	10	2	4	7	3	2	0	0	0	5	2	2	1	0.0488635	0	0
ENSG00000284744	0	0	6	1	1	2	0	0	0	0	0	0	0	0	0	0	0	0	0	0	1	1	0	0	0	0	0	0	0	1	0	1	0	0	0	0	0	0	0	0	0	0	0	0	0	0	0	0	0.199067
ENSG00000162458	0	2	0	0	0	0	1	0	0	0	2	1	3	2	4	0	4	0	0	0	0	0	1	0	0	0	4	1	2	2	0	0	0	1	0	2	0	0	0	0	0	0	0	0	0	0	0	0.0167453	0
ENSG00000188910	0	0	0	0	0	0	0	0	0	0	0	0	0	0	0	0	0	0	0	0	0	0	0	0	0	0	0	0	0	0	0	0	0	0	0	0	0	0	0	0	0	0	0	0	0	0	0	0	0
ENSG00000186056	18	10	15	23	17	21	24	18	13	22	17	14	10	21	19	23	9	17	74	72	59	82	102	51	52	80	115	64	91	102	38	46	24	36	38	37	32	20	40	69	50	79	46	60	75	70	0.144478	0.0905301	0.122067
ENSG00000116138	2373	2062	2363	1884	2449	2188	2276	2182	2423	2497	2638	2478	2238	2208	2974	2645	2839	3094	2226	2470	2596	2217	2421	1571	1573	1690	1454	987	1512	1568	1008	1016	3779	4172	4091	3892	4340	3649	3730	1738	2418	2243	1713	1912	2104	2434	8.95072	8.7723	9.03656
ENSG00000231207	0	0	0	0	0	0	0	0	0	2	0	0	0	0	0	0	0	0	0	0	0	0	0	0	0	0	0	0	0	0	0	0	0	0	0	0	0	0	0	0	0	0	0	0	0	0	0	0	0
ENSG00000142765	93	61	79	62	85	57	83	68	105	111	81	102	76	51	78	72	87	86	183	126	219	152	212	85	90	163	171	121	170	180	88	111	90	121	100	86	127	84	96	174	212	226	161	180	163	177	0.537927	0.397956	0.463284
ENSG00000158161	8622	7763	8518	7025	9653	8478	8244	7898	8084	8669	8931	8495	4438	4371	5599	4707	5460	5602	1667	1875	1812	1659	1805	1139	1094	1834	1794	1138	1699	1850	1004	1038	3488	3645	3571	3763	3913	3287	3236	4195	5952	5576	4652	5098	5186	6166	43.3499	44.0225	43.4208
ENSG00000270330	0	0	0	0	0	0	0	0	2	0	0	0	0	0	0	0	0	0	0	0	0	0	0	0	0	0	0	0	0	0	0	0	0	0	0	0	0	0	0	2	0	0	3	0	1	0	0	0	0
ENSG00000060642	851	648	784	649	850	819	617	619	675	771	743	664	275	273	401	315	360	344	353	398	390	346	404	228	202	378	392	260	418	411	236	219	401	415	377	376	438	353	336	286	395	326	275	382	346	376	4.6809	4.02013	4.37216
ENSG00000224064	0	0	0	0	0	0	0	0	0	0	0	0	0	0	0	0	0	2	0	0	0	0	0	0	0	0	0	0	0	0	0	0	0	0	0	0	0	0	0	0	0	0	0	0	0	0	0	0	0
ENSG00000234619	5	9	4	8	8	6	2	3	6	10	15	2	5	10	5	8	3	8	8	14	8	8	7	8	10	2	14	4	0	4	1	0	0	2	0	0	2	0	0	15	27	14	17	26	23	35	0.245431	0.498273	0.199067
ENSG00000121769	472	416	426	401	462	469	418	405	469	483	429	390	434	324	523	418	472	548	30	32	22	17	17	12	25	18	21	8	16	28	8	10	148	173	201	165	166	151	129	17	40	40	36	32	33	43	10.9049	10.8402	9.97856
ENSG00000236963	0	0	0	0	0	0	0	0	0	0	0	0	0	0	0	0	0	0	5	3	3	3	4	0	1	0	0	0	0	0	0	0	0	0	0	0	0	0	0	0	0	0	0	0	0	0	0	0	0
ENSG00000232557	0	0	0	0	0	0	3	1	2	7	3	1	0	0	0	0	0	0	1	1	5	1	3	4	1	4	4	4	6	11	1	2	0	1	1	0	0	0	0	12	18	26	14	15	22	15	0	0	0
ENSG00000162413	503	508	578	495	603	558	577	570	553	571	573	602	195	194	237	224	216	251	202	176	172	248	266	137	100	168	198	130	210	234	124	171	250	246	231	243	290	202	175	194	313	292	245	213	207	271	2.35419	2.68165	2.74272
ENSG00000142627	9	20	2	6	10	10	10	23	10	17	16	7	0	9	12	4	2	4	6	2	4	2	2	4	5	9	15	0	10	2	0	7	0	0	0	0	0	0	0	2	12	10	16	6	0	2	0.0701978	0.175944	0.0158158
ENSG00000284668	0	0	0	0	0	0	0	0	0	0	0	0	0	0	0	0	0	0	4	3	2	1	0	1	2	0	0	0	0	1	0	0	0	0	0	0	0	0	0	0	0	0	0	0	0	0	0	0	0
ENSG00000142632	8	15	38	9	25	35	37	15	28	27	13	24	6	10	15	16	7	8	19	37	16	20	25	11	9	41	40	24	46	26	20	22	15	6	13	21	12	9	4	33	47	63	47	54	49	38	0.0682128	0.144255	0.328503
ENSG00000234593	0	0	0	0	0	0	0	0	0	0	0	0	0	0	0	0	0	0	0	0	0	0	0	0	0	0	2	0	0	0	0	1	0	0	0	0	0	0	0	0	0	0	0	0	0	0	0	0	0
ENSG00000162490	34	35	52	33	63	50	40	44	34	57	32	43	6	16	30	26	41	26	40	20	40	19	16	26	10	50	26	22	28	26	12	18	39	42	57	29	50	35	44	24	33	40	31	38	35	60	0.149105	0.17312	0.231204
ENSG00000158292	19	16	21	10	28	25	10	3	3	11	10	17	9	3	9	15	16	14	16	11	11	21	10	8	4	8	10	11	14	11	10	5	30	39	42	38	13	21	47	11	27	9	21	11	22	29	0.146183	0.138844	0.163811
ENSG00000270605	14	18	19	17	17	12	39	40	35	42	68	45	20	33	33	33	48	35	41	31	47	41	49	41	22	18	23	30	28	32	9	21	33	36	36	45	45	23	36	107	153	156	153	162	120	172	0.232485	0.337135	0.319889
ENSG00000238199	2	0	2	1	1	2	2	2	2	2	0	1	0	0	0	0	0	0	7	5	3	4	5	2	7	5	2	4	4	8	5	5	2	2	2	0	2	2	2	0	1	0	0	1	2	0	0.14782	0	0.14987
ENSG00000142733	99	90	114	95	115	85	92	71	57	103	93	79	88	90	117	96	87	98	109	104	83	117	96	61	61	74	69	73	83	118	21	60	87	105	149	98	88	84	53	107	177	168	135	142	132	178	0.556488	0.570595	0.649688
ENSG00000189337	3	10	3	4	2	4	7	4	8	5	7	0	14	14	22	14	12	18	3	4	6	0	5	2	2	0	4	2	1	0	0	0	2	11	1	6	6	2	0	2	9	2	2	3	4	2	0.00699108	0.0262838	0.007088
ENSG00000270601	0	0	0	0	0	0	0	0	0	0	0	0	0	0	0	0	0	0	0	0	0	0	1	0	0	0	0	0	0	0	0	0	0	0	0	0	0	0	0	0	0	0	0	0	0	0	0	0	0
ENSG00000233268	0	0	0	0	0	0	0	0	0	0	0	0	0	0	0	0	0	0	1	0	0	1	1	0	0	0	0	0	0	0	0	0	0	0	0	0	0	0	0	0	0	0	3	0	1	0	0	0	0
ENSG00000232912	47	32	32	27	29	32	56	42	37	65	61	50	17	10	26	16	11	33	27	36	51	26	42	20	12	65	62	34	45	46	26	19	59	51	61	62	36	51	59	46	68	51	37	52	62	72	1.28866	0.98959	0.88955
ENSG00000235084	4	7	17	11	10	12	7	6	3	17	16	5	9	16	11	8	16	11	2	7	0	2	0	5	2	1	0	3	3	0	0	2	3	2	0	0	1	1	0	16	11	13	18	4	15	17	0.289027	0.570481	1.24539
ENSG00000235143	0	0	0	0	0	0	0	0	0	0	0	0	0	0	0	0	0	0	0	2	0	0	0	0	0	0	0	0	0	0	0	0	0	0	0	0	0	0	0	0	0	0	0	0	0	0	0	0	0
ENSG00000225478	0	0	0	0	0	0	0	0	0	0	0	0	0	0	0	0	0	0	0	1	1	0	0	2	0	0	0	0	0	0	0	0	0	0	0	0	0	0	0	0	0	0	0	0	0	0	0	0	0
ENSG00000225077	22	9	22	9	7	2	4	1	6	21	4	6	4	3	3	0	2	5	0	0	0	0	0	0	0	2	4	0	1	0	1	0	8	10	7	22	9	8	10	5	4	3	0	0	3	0	0.301346	0.139043	0.305523
ENSG00000028137	1185	1148	1228	1003	1299	1237	971	1013	1165	1215	1323	1217	512	474	606	533	703	650	1105	1183	1351	1253	1175	752	730	1496	1455	983	1335	1409	852	877	731	770	694	721	838	608	665	358	478	532	461	485	498	531	10.1308	11.0696	10.6439
ENSG00000238249	0	1	0	3	11	3	0	0	2	0	0	0	4	0	2	0	3	3	5	3	5	1	1	2	2	0	4	2	0	4	0	0	6	9	6	11	10	17	15	6	23	17	7	6	10	17	0	0.04903	0
ENSG00000237938	30	38	57	37	39	40	33	28	57	52	55	53	21	17	20	27	19	28	79	62	66	55	84	31	38	40	39	38	46	55	30	23	30	27	24	12	23	13	37	18	21	32	20	14	23	31	0.63207	0.903009	1.21758
ENSG00000227409	62	95	90	97	132	103	117	97	83	100	130	133	80	92	85	88	133	90	125	128	149	127	182	84	68	194	185	121	158	184	111	78	146	139	132	77	129	125	109	206	277	327	149	238	194	306	4.3628	7.53983	6.42089
ENSG00000204464	6	2	6	0	6	3	5	0	0	0	2	1	0	7	3	0	4	2	0	0	0	0	0	0	0	0	0	0	0	0	0	0	6	0	2	5	3	0	11	0	0	0	0	0	0	0	0.346677	0.130337	0.351484
ENSG00000162460	0	0	0	0	0	0	0	0	0	0	1	0	0	0	0	0	0	0	0	0	0	1	0	0	0	0	0	0	0	0	0	0	0	0	0	0	0	0	0	0	0	0	0	0	0	0	0	0	0
ENSG00000142687	1083	948	1176	852	1027	1139	1448	1347	1572	1552	1679	1582	329	236	364	288	334	381	712	664	772	710	749	396	410	1140	979	646	1066	1057	612	552	1269	1459	1377	1441	1559	1174	1127	938	1178	1214	1023	1119	1061	1235	3.63651	3.59029	4.00353
ENSG00000284543	74	73	54	39	77	57	78	57	56	76	62	78	41	41	47	37	53	56	8	4	15	0	6	4	1	4	11	13	7	11	0	2	0	1	2	2	3	9	6	9	23	20	11	6	21	7	0.2427	0.270038	0.179561
ENSG00000223382	0	0	0	0	0	0	2	6	2	2	6	0	4	4	3	0	2	4	0	0	0	0	0	0	0	0	0	0	0	0	0	0	0	0	0	0	0	0	0	0	0	0	0	0	0	0	0	0	0
ENSG00000130939	330	320	331	300	398	370	458	412	446	421	500	452	294	274	313	388	342	409	457	457	515	496	532	370	306	539	474	341	484	548	305	371	465	472	442	494	556	406	427	553	739	670	502	649	734	765	1.1539	1.26203	1.17344
ENSG00000236216	0	0	0	0	0	0	0	0	0	0	0	0	0	0	0	0	1	0	0	0	0	0	0	0	0	0	0	0	0	0	0	0	0	0	0	0	0	0	0	2	0	0	0	0	0	0	0	0	0
ENSG00000175147	20	12	30	9	9	14	0	0	0	2	5	0	1	12	4	14	1	4	0	0	3	0	0	0	0	1	0	0	2	4	2	1	0	0	0	2	2	0	0	0	1	0	0	0	0	0	0.0539527	0.0365114	0.082051
ENSG00000236266	22	18	28	26	11	33	24	18	28	34	24	29	17	16	26	23	41	19	20	25	22	18	38	15	22	17	19	8	13	14	5	6	11	18	11	22	26	13	19	9	9	7	5	10	2	25	0.856112	0.790033	1.1047
ENSG00000231103	0	0	0	0	0	0	0	0	0	0	0	0	0	0	0	0	0	0	2	0	2	3	1	2	2	0	0	0	0	0	0	0	0	0	0	0	0	0	0	0	0	0	0	0	0	0	0	0	0
ENSG00000060656	0	2	0	2	0	0	0	2	0	4	4	0	0	0	0	0	0	0	0	2	1	0	0	0	0	0	0	0	0	0	0	0	0	0	0	0	2	0	0	2	0	0	0	0	0	0	0	0.0109037	0
ENSG00000163867	625	550	605	534	741	631	489	483	529	510	537	592	564	599	745	701	679	764	545	553	496	548	586	436	383	396	400	234	364	349	299	287	429	491	439	420	512	468	423	528	720	692	568	699	740	820	2.10982	2.09408	2.07062
ENSG00000232768	3	4	3	10	1	6	11	9	15	12	8	13	1	5	5	4	0	5	46	32	49	36	60	15	42	41	35	21	27	49	20	27	4	11	5	3	3	5	1	26	37	29	24	32	17	27	0.594456	0.893971	0.602697
ENSG00000225294	0	0	0	0	0	0	0	0	0	0	0	1	0	0	0	0	0	0	0	0	0	0	0	1	0	0	0	0	0	0	0	0	0	0	0	0	0	0	0	1	0	0	0	0	0	0	0	0	0
ENSG00000189280	0	0	0	0	0	0	0	0	0	0	0	0	0	0	0	0	0	0	2	0	2	1	0	1	0	8	10	0	2	8	6	5	0	0	0	0	0	0	0	0	0	0	0	0	0	0	0	0	0
ENSG00000134698	761	712	764	597	799	715	840	748	766	959	879	857	707	525	775	669	821	743	529	524	551	488	528	378	330	580	472	330	457	543	279	358	975	1026	1011	1057	1095	932	897	742	1016	1020	865	884	907	1036	3.31124	3.49423	3.37038
ENSG00000134690	79	57	77	58	91	58	115	65	95	90	70	75	14	19	38	30	50	35	28	33	27	10	22	12	14	33	26	20	25	26	24	17	263	265	229	284	253	216	229	44	64	62	45	58	58	66	1.06052	0.863038	1.048
ENSG00000272420	12	16	25	14	27	17	18	8	4	26	27	21	0	7	6	0	15	2	21	24	24	13	19	10	16	35	34	14	19	24	21	16	32	15	21	33	24	24	27	38	53	42	38	49	47	57	0.682368	1.02618	1.44131
ENSG00000224333	0	0	0	0	0	0	0	0	0	0	0	0	0	0	0	0	0	0	0	0	0	0	0	0	0	0	0	0	0	0	0	0	0	0	0	0	0	0	0	0	2	0	0	0	2	2	0	0	0
ENSG00000226664	6	2	7	2	6	3	5	12	3	12	3	4	1	1	0	3	6	4	3	3	2	1	1	0	0	2	0	4	1	2	0	3	2	0	0	2	4	6	0	15	6	6	3	12	5	12	0.846256	0.31816	1.00099
ENSG00000132881	16	12	11	19	14	24	6	14	10	15	10	16	6	2	7	4	5	4	0	0	0	1	2	6	0	0	0	2	2	2	3	0	8	10	10	8	17	6	3	8	6	22	12	12	8	18	0.328323	0.277733	0.228851
ENSG00000273274	2	0	0	0	0	0	0	0	0	2	0	0	2	0	0	0	0	0	0	3	4	2	0	8	4	0	0	0	2	2	0	0	2	2	2	2	3	2	4	0	0	0	0	0	0	0	0.00503449	0	0
ENSG00000224321	0	0	0	0	0	0	1	0	0	0	0	0	1	0	1	7	0	0	0	0	0	0	0	0	0	0	0	0	0	0	0	0	0	0	0	0	0	0	0	0	0	0	0	1	1	0	0	0	0
ENSG00000233621	611	630	597	462	610	610	556	531	587	668	623	673	182	159	221	198	207	195	61	51	80	48	69	46	37	74	82	52	67	87	67	40	176	181	195	210	258	219	176	68	113	87	67	110	135	95	6.53678	7.60201	6.47555
ENSG00000116251	619	572	657	495	630	564	548	485	570	571	580	486	739	678	880	699	823	936	1193	1055	1231	1123	1240	865	825	1167	1139	695	1042	1101	714	741	786	897	863	959	974	836	812	1382	1794	1684	1476	1676	1749	1884	4.28573	4.46679	4.61189
ENSG00000272510	0	2	2	2	2	2	0	4	3	0	1	0	1	0	0	1	2	2	0	7	11	4	6	3	3	6	3	2	2	9	5	2	2	4	2	2	4	3	1	2	3	6	0	2	3	1	0	0.210574	0.189286
ENSG00000158286	38	30	53	36	73	57	45	30	28	40	40	23	15	10	9	16	22	18	12	14	13	8	12	7	11	9	14	2	11	14	4	5	47	28	37	33	28	25	20	8	5	17	6	16	4	12	0.186104	0.165713	0.263164
ENSG00000236648	2	0	0	0	0	1	0	0	0	0	0	0	0	0	0	0	0	0	0	0	0	0	0	0	0	0	0	0	0	2	0	0	0	0	0	0	0	0	0	0	0	0	0	0	0	0	0.0486427	0	0
ENSG00000232273	14	2	16	6	6	12	4	0	10	7	4	7	2	0	0	1	3	0	8	14	4	8	4	7	0	23	16	12	14	18	12	0	13	14	10	19	15	5	16	15	22	22	10	21	25	39	0.849968	0.136952	0.984859
ENSG00000237276	13	14	15	11	9	23	18	14	12	10	28	14	11	8	14	10	11	9	0	4	3	3	3	2	0	18	8	13	7	6	6	8	4	5	0	5	2	8	4	6	4	9	2	0	7	1	0.210997	0.256287	0.246833
ENSG00000227959	0	0	0	0	1	1	0	0	3	2	0	2	0	0	0	0	0	0	0	0	0	0	0	0	0	0	0	0	0	0	0	0	0	0	0	0	0	0	0	0	0	0	0	0	0	0	0	0	0
ENSG00000043514	279	180	237	188	255	196	273	249	296	276	285	258	285	250	319	282	289	357	176	151	151	151	237	137	129	132	118	77	97	123	82	78	253	311	300	337	267	243	270	205	333	304	219	292	304	421	1.37936	1.00372	1.18796
ENSG00000186543	0	0	0	0	0	0	0	0	0	1	0	0	0	0	0	0	0	0	0	0	0	0	0	0	0	0	0	0	0	0	0	0	0	0	0	0	0	0	0	0	0	0	0	0	0	0	0	0	0
ENSG00000231789	130	93	104	51	130	87	71	46	88	80	87	94	98	120	146	146	185	135	6	21	11	6	17	4	14	0	6	2	12	14	2	0	16	15	9	11	6	15	9	17	35	24	12	36	18	22	4.47161	3.60801	3.62688
ENSG00000162510	11	4	0	3	3	4	0	2	1	0	0	0	0	0	0	0	0	0	32	25	27	40	27	19	8	11	18	20	30	31	6	3	10	11	10	7	2	5	6	0	0	0	0	4	0	0	0.0771691	0.0316501	0
ENSG00000179002	0	0	0	0	0	0	0	0	0	0	0	0	0	0	0	0	0	0	2	3	0	0	4	0	3	2	2	0	0	0	0	2	0	0	0	0	0	0	0	0	0	0	0	0	0	0	0	0	0
ENSG00000223589	2	2	0	2	0	0	2	0	0	2	0	0	0	0	0	0	0	0	2	0	0	0	0	0	0	0	0	0	0	0	0	0	0	0	0	5	0	2	0	0	7	3	2	3	4	5	0.189993	0.21429	0
ENSG00000229259	0	0	0	0	0	0	0	0	0	0	0	0	0	0	0	0	0	0	0	0	0	0	0	0	0	0	0	1	0	2	2	1	0	0	0	0	0	0	0	0	0	0	0	0	0	0	0	0	0
ENSG00000270171	0	0	0	0	0	0	2	0	6	7	4	0	0	0	0	0	0	0	6	10	12	2	4	4	2	9	14	6	4	14	6	5	4	0	10	2	2	8	2	6	2	2	4	4	8	4	0	0	0
ENSG00000158008	0	4	6	2	3	6	4	0	0	1	2	3	3	2	5	1	5	4	13	4	6	12	17	0	5	4	5	0	1	8	4	6	0	0	0	0	0	0	0	9	10	5	17	5	2	3	0	0.0320822	0.0432583
ENSG00000130940	57	78	103	59	65	82	88	76	104	102	97	97	30	32	47	24	27	32	372	390	438	388	404	232	197	609	564	394	578	580	342	275	123	91	122	116	116	100	82	157	196	202	137	143	131	153	0.162406	0.25066	0.297538
ENSG00000116771	86	74	113	87	88	107	68	55	68	94	82	56	62	50	77	89	68	94	84	85	100	103	118	51	78	108	135	83	149	131	59	92	142	190	216	168	183	186	174	290	453	423	348	354	406	414	0.897478	0.871007	1.19559
ENSG00000237301	0	0	0	0	0	0	4	0	6	0	2	2	2	2	0	3	4	0	1	0	2	0	0	0	0	2	0	0	4	0	0	2	7	4	0	6	9	2	5	2	0	5	3	0	0	4	0	0	0
ENSG00000162585	102	94	92	96	117	92	97	101	104	140	101	106	67	75	87	86	102	86	66	99	96	95	106	62	54	88	87	64	79	121	55	54	114	128	130	141	137	98	96	72	112	88	88	89	61	82	0.301802	0.3137	0.275988
ENSG00000163879	9	2	0	4	4	2	10	5	8	7	4	5	5	6	3	9	10	0	4	4	2	8	9	1	0	3	1	2	1	2	1	0	0	0	0	0	0	0	0	0	0	0	0	2	0	0	0.0652354	0.0163507	0
ENSG00000227527	1	13	1	6	10	15	13	7	8	9	9	3	0	9	2	1	3	1	3	0	4	2	0	0	2	3	0	3	0	2	2	0	10	5	9	2	5	1	3	16	21	22	19	27	21	18	0.0488635	0.716461	0.0495409
ENSG00000127129	2	4	6	0	0	2	0	0	0	0	0	0	0	0	2	0	0	0	0	0	0	0	0	0	0	0	0	0	0	0	4	1	0	0	0	0	0	0	0	0	0	0	0	0	0	0	0.0391738	0.088367	0.119151
ENSG00000228823	0	0	0	0	0	0	0	0	0	0	0	0	2	0	0	0	0	0	0	0	0	0	0	0	0	0	0	0	0	0	0	0	0	0	0	0	0	0	0	0	0	0	0	0	0	0	0	0	0
ENSG00000010803	122	108	88	76	110	116	109	85	111	148	116	101	57	39	51	38	52	52	165	130	154	113	157	123	95	143	157	80	146	135	76	98	128	154	117	142	122	130	127	120	170	177	107	161	151	170	0.886092	0.884723	0.648009
ENSG00000229901	0	0	0	0	0	0	0	0	0	0	0	0	2	0	0	0	4	5	0	0	0	0	0	0	0	0	0	0	0	0	0	0	0	0	0	0	0	0	0	0	0	0	0	0	0	0	0	0	0
ENSG00000169991	98	36	63	32	54	62	45	47	40	75	36	63	23	18	19	34	26	38	64	89	95	94	88	54	77	81	75	59	135	80	42	62	160	167	153	117	141	139	115	100	102	74	89	85	72	103	0.512264	0.212244	0.333878
ENSG00000116954	2805	2219	2621	2114	2902	2540	3044	2950	3039	3296	3495	3219	1579	1654	2117	1816	2034	2174	859	923	967	872	999	712	571	1354	1139	829	1144	1269	685	741	1529	1621	1507	1536	1525	1469	1358	1524	1959	1798	1554	1685	1793	2085	17.7088	15.8007	16.7765
ENSG00000117013	0	7	6	2	2	8	0	0	0	1	0	0	0	0	0	0	0	0	6	0	1	3	6	2	0	0	0	0	0	5	0	0	0	2	0	0	0	2	0	0	0	4	0	2	3	0	0	0.0578505	0.0445733
ENSG00000228589	468	421	553	448	535	447	466	384	465	477	587	466	626	609	814	710	812	871	196	194	240	196	216	174	175	259	241	134	277	212	158	142	429	424	427	357	517	397	356	300	528	461	386	424	514	483	22.1965	22.5209	26.5915
ENSG00000163873	0	0	0	0	0	0	0	0	0	0	0	0	0	0	0	0	0	0	2	1	10	6	11	1	2	3	1	0	0	2	3	0	0	2	0	0	0	0	0	0	0	0	0	0	0	0	0	0	0
ENSG00000233431	0	0	0	0	0	0	0	0	0	0	0	0	0	0	0	0	0	0	1	1	1	0	0	3	0	2	0	1	1	0	0	2	0	0	0	0	0	0	0	0	0	0	0	0	0	0	0	0	0
ENSG00000117215	5	0	2	0	0	0	0	0	0	0	0	0	0	0	0	0	0	0	0	0	0	0	0	0	0	0	1	0	4	2	0	2	0	0	0	0	0	0	0	6	10	4	7	2	2	6	0.0602364	0	0.0244286
ENSG00000223583	0	5	0	0	0	0	4	4	2	0	3	6	0	0	0	0	0	0	10	12	0	1	3	5	4	3	2	0	0	0	1	0	5	11	12	14	10	13	5	0	0	4	8	2	0	2	0	0.340461	0
ENSG00000196449	278	236	273	186	276	232	185	226	204	227	229	251	272	266	339	262	374	411	131	114	137	135	146	98	74	130	120	78	122	121	83	103	256	280	290	299	283	225	212	158	259	218	154	202	161	191	4.8588	4.65223	4.83756
ENSG00000250575	0	0	0	0	1	0	0	1	0	0	0	0	0	0	0	0	0	0	1	0	0	0	0	0	0	0	0	0	0	0	0	0	0	0	0	0	0	0	0	0	0	0	0	0	0	0	0	0	0
ENSG00000253368	0	0	0	0	0	0	0	0	0	0	0	0	0	0	0	0	0	0	3	0	0	0	0	4	2	0	2	0	0	0	0	0	0	0	0	0	0	0	0	0	0	0	2	0	0	0	0	0	0
ENSG00000179862	15	12	12	6	10	11	4	7	4	1	7	0	2	6	17	12	14	4	3	0	3	2	0	2	0	3	2	9	0	2	0	0	6	12	0	7	4	3	2	3	8	10	2	5	8	3	0.369833	0.333704	0.299968
ENSG00000116661	88	66	69	73	92	52	47	63	50	69	59	57	38	43	25	49	53	64	25	24	32	27	29	12	24	27	11	6	34	10	8	7	227	216	210	229	264	189	191	30	50	42	42	38	43	36	0.898606	0.760143	0.714357
ENSG00000287400	4	2	9	3	8	4	10	11	11	8	8	2	4	1	0	3	0	3	0	1	2	0	0	0	0	4	0	0	0	4	2	0	0	0	0	0	0	0	0	0	0	0	0	0	0	0	0.0291177	0.0164207	0.066423
ENSG00000227538	0	0	0	0	0	0	0	0	0	0	0	0	0	0	0	0	0	0	0	0	6	3	2	2	8	3	4	0	4	0	2	0	0	0	0	0	0	0	0	0	0	0	0	0	0	0	0	0	0
ENSG00000232208	14	20	26	10	15	19	10	17	4	17	11	24	8	17	12	4	22	8	20	42	33	24	42	13	30	72	79	50	68	79	33	54	179	226	178	247	241	193	199	268	304	276	305	353	273	343	1.28461	2.06985	2.41878
ENSG00000162461	18	40	34	20	31	30	33	24	35	29	19	40	31	17	27	23	35	20	58	44	55	50	78	30	13	48	79	56	73	61	26	42	16	23	24	27	37	20	13	55	51	73	76	52	44	89	0.17417	0.43654	0.333548
ENSG00000236500	0	0	0	0	0	0	0	0	0	0	0	0	0	0	0	0	0	0	2	2	1	4	6	3	2	0	0	0	0	0	0	0	0	0	0	0	0	0	0	0	0	0	0	0	0	0	0	0	0
ENSG00000044012	0	0	0	0	0	0	0	0	1	2	0	0	0	0	0	0	0	0	0	0	0	0	0	0	0	0	0	0	0	0	0	0	0	0	0	0	0	0	0	0	0	0	0	0	0	0	0	0	0
ENSG00000179051	279	208	292	207	234	253	314	271	292	362	310	360	145	137	167	134	160	170	249	209	206	227	251	154	132	330	305	211	309	299	182	179	367	404	350	394	446	380	324	359	457	391	399	392	378	453	2.20921	1.85764	2.3442
ENSG00000215895	5	8	5	6	6	1	3	6	8	4	5	1	0	3	3	3	3	0	2	0	2	1	2	3	0	2	2	4	3	0	1	1	4	3	3	1	3	1	0	0	7	6	3	3	4	8	0.0823948	0.148691	0.0835371
ENSG00000231868	0	0	0	0	1	0	0	0	0	0	0	0	0	0	0	0	0	0	0	0	0	0	0	0	0	0	0	0	0	0	0	0	0	0	0	0	0	0	0	0	0	0	0	0	0	0	0	0	0
ENSG00000237329	2	3	0	4	2	1	0	2	0	0	0	5	2	0	0	0	0	0	12	7	8	5	17	6	10	5	13	6	14	8	6	0	0	0	0	0	0	0	0	0	0	0	0	2	0	0	0.127411	0.215558	0
ENSG00000236948	0	0	0	0	0	0	0	0	2	2	4	0	0	0	0	2	1	2	2	3	1	1	7	8	4	0	0	0	0	2	0	1	3	0	2	0	0	2	4	2	2	5	16	6	10	13	0	0	0
ENSG00000053372	868	775	964	804	974	885	813	762	893	936	890	872	389	484	658	562	580	706	887	862	895	756	877	565	551	1268	1291	811	1317	1248	841	904	1334	1522	1325	1601	1569	1272	1304	1161	1544	1473	1258	1408	1426	1589	10.9684	11.0457	12.3504
ENSG00000287510	0	0	0	0	0	0	0	0	1	0	0	0	0	0	0	0	0	0	2	0	2	0	2	0	0	0	0	0	0	0	0	0	0	0	0	0	0	0	0	0	0	0	0	0	0	0	0	0	0
ENSG00000126067	8668	7874	8604	7012	9105	8526	7453	6796	7398	7919	7991	7716	8434	8015	10716	8773	10205	11455	1571	1760	1773	1497	1778	1168	1045	2467	2288	1548	2224	2331	1453	1598	5296	5984	5718	5767	6337	5210	5206	2871	4074	3785	2985	3083	3597	3718	61.8299	63.349	62.2242
ENSG00000274944	2	0	2	0	0	0	3	1	1	1	2	0	0	0	0	0	0	1	0	0	0	0	0	0	0	0	1	0	0	2	0	1	0	0	1	0	0	0	0	0	0	0	0	0	2	0	0.0198701	0	0.0201455
ENSG00000066136	1423	1085	1208	1032	1357	1251	1168	1106	1131	1259	1329	1250	634	623	922	737	888	809	717	817	873	718	794	459	485	1072	900	620	877	1071	571	743	1127	1260	1247	1405	1315	1017	1072	996	1304	1240	1130	1106	1214	1382	7.67298	6.59863	6.60398
ENSG00000132906	719	624	636	521	739	710	526	564	561	544	689	583	167	169	188	174	221	237	247	274	251	268	317	189	175	395	342	243	364	335	213	249	542	527	490	529	588	483	453	185	299	249	204	235	230	299	4.40744	4.31427	3.95271
ENSG00000286668	0	0	0	0	0	0	0	0	0	0	0	0	0	0	0	0	0	0	0	0	0	0	0	0	0	0	1	0	2	0	0	0	0	0	0	0	0	0	0	0	0	0	0	0	0	0	0	0	0
ENSG00000197312	563	521	538	443	548	521	531	478	568	602	622	597	348	341	427	442	488	504	452	457	450	403	402	329	333	366	360	234	373	358	258	228	710	741	633	751	733	633	721	486	798	705	550	607	711	768	1.4932	1.55852	1.44668
ENSG00000284748	0	0	0	0	0	0	0	0	0	0	0	0	0	0	0	0	0	0	0	0	0	0	0	0	0	1	3	0	1	6	2	0	0	0	0	0	0	0	0	0	0	0	0	0	0	0	0	0	0
ENSG00000272078	3	3	2	2	3	2	6	1	2	2	3	1	3	0	0	0	0	2	2	0	0	0	0	0	0	2	8	4	2	4	2	0	2	0	0	0	0	0	4	0	0	0	0	0	0	0	0.0122297	0.0137938	0.0082662
ENSG00000173660	6162	5569	6385	5222	6918	6191	5348	4845	5409	5921	5800	5369	9009	8575	11120	9910	10944	12090	2273	2313	2611	2461	2615	1588	1672	2715	2503	1646	2521	2541	1687	1651	5250	6015	5635	5983	6127	5107	4991	3100	4075	3988	3149	3627	3770	3956	148.415	151.286	155.919
ENSG00000224592	1	1	2	1	2	0	0	0	2	0	0	0	0	3	2	2	1	0	1	0	0	0	1	0	1	0	0	1	0	0	0	0	0	6	3	3	9	1	3	0	0	0	0	0	0	0	0.0472204	0.0532592	0.0957501
ENSG00000215893	0	0	0	0	0	0	0	0	0	0	1	0	0	0	0	0	0	0	0	0	0	0	0	0	0	0	0	0	2	1	0	0	0	0	0	0	0	0	0	0	0	0	0	0	0	0	0	0	0
ENSG00000231606	0	0	0	0	0	0	0	0	0	0	0	0	0	0	0	0	0	0	4	14	8	14	2	10	2	0	0	2	2	0	0	1	0	0	0	0	0	0	0	0	0	0	0	0	0	0	0	0	0
ENSG00000215900	0	0	0	0	0	0	0	0	0	0	0	0	0	0	0	0	0	0	0	0	0	0	0	0	0	0	0	0	0	0	0	0	0	0	0	0	0	0	0	0	0	0	0	0	0	0	0	0	0
ENSG00000092847	2543	2279	2415	1908	2497	2369	2236	2198	2332	2489	2525	2608	1412	1472	1871	1554	1755	2048	1998	2074	2089	1902	2391	1488	1365	2417	2082	1435	2039	2238	1229	1337	2928	3235	3233	3265	3486	2749	2762	2900	3631	3796	2922	3377	3378	3971	5.9133	5.97713	5.69351
ENSG00000284632	0	2	0	0	0	0	0	0	0	2	0	0	0	0	0	0	0	0	0	0	0	0	1	0	0	0	0	0	0	0	0	0	0	0	0	0	0	0	0	0	0	0	0	0	0	0	0	0.0587569	0
ENSG00000241014	0	0	0	0	0	0	0	0	0	0	0	0	2	0	0	0	0	0	0	0	0	0	0	0	0	2	2	0	0	0	0	0	0	0	0	0	0	2	0	0	1	2	0	0	0	0	0	0	0
ENSG00000054118	10272	9539	10715	8589	10924	9875	9315	9035	9651	11429	10668	10020	6049	6534	7913	6518	7141	8008	11403	11678	12513	11170	12773	7627	7323	15369	14518	9788	14285	14601	9104	9111	10255	11742	10752	11003	11860	9926	9791	10758	15265	14556	10844	12583	13086	14233	70.2909	73.6227	74.3388
ENSG00000254553	0	0	0	0	0	0	0	0	0	0	3	0	0	0	0	0	0	0	0	0	0	0	0	0	0	0	0	0	0	0	0	0	0	0	0	0	0	0	0	0	0	0	0	0	0	0	0	0	0
ENSG00000230415	2	0	0	0	0	0	0	0	0	1	2	0	0	0	0	0	0	0	0	0	0	0	0	0	0	0	0	2	0	0	0	0	0	0	0	0	0	0	0	2	0	0	1	4	0	8	0.125921	0	0
ENSG00000177181	9	12	17	5	15	16	0	2	0	0	0	0	0	0	0	0	0	0	2	8	8	2	2	2	2	8	8	7	8	6	0	6	7	12	6	11	15	6	4	4	9	9	3	4	6	5	0.0273255	0.0410934	0.0523305
ENSG00000237749	0	0	1	0	2	0	1	0	0	2	0	0	0	0	2	0	0	0	5	6	2	2	2	0	0	1	3	2	2	0	0	1	3	2	1	0	3	2	0	5	1	1	3	0	0	1	0	0	0.129433
ENSG00000224863	0	0	0	0	0	0	2	0	0	2	2	0	2	2	2	0	0	2	2	1	2	2	6	0	0	0	0	0	0	2	0	0	1	2	4	9	2	2	4	0	3	1	2	2	2	4	0	0	0
ENSG00000276747	0	0	0	0	0	0	0	0	0	8	0	0	4	2	1	0	3	2	7	19	8	4	5	6	4	7	5	9	4	4	0	4	1	2	0	0	2	0	8	0	0	0	0	0	0	0	0	0	0
ENSG00000284705	0	0	0	0	0	0	0	0	0	0	0	0	0	0	0	0	0	0	0	0	0	0	0	0	0	0	0	0	0	0	4	0	0	0	0	0	0	0	0	0	0	0	0	0	0	0	0	0	0
ENSG00000287828	1	2	8	1	1	2	3	9	6	10	6	8	8	1	7	2	3	6	0	2	0	0	0	0	1	5	1	0	4	3	0	3	0	0	0	0	0	0	0	0	0	0	0	0	0	0	0.0443664	0.10008	0.359852
ENSG00000228776	0	0	0	0	0	0	0	0	0	0	0	0	0	0	0	0	0	2	0	0	0	0	0	0	0	0	0	0	0	0	0	0	0	0	0	0	0	0	0	0	0	0	0	0	0	0	0	0	0
ENSG00000228526	129	99	95	83	122	123	154	126	143	142	150	167	61	68	71	44	45	55	2	2	7	2	2	2	0	18	6	0	6	8	8	1	35	33	26	28	32	45	31	32	29	29	18	26	13	31	0.478803	0.414445	0.357495
ENSG00000159339	316	247	287	236	265	258	354	350	392	417	409	327	152	145	194	163	148	164	350	363	372	313	378	214	216	135	116	95	130	124	90	100	49	67	41	84	61	37	52	95	155	146	114	112	87	133	3.43535	3.02862	3.16333
ENSG00000284678	2	2	0	1	2	0	0	1	3	0	1	2	2	2	1	2	2	1	1	1	0	0	0	0	0	1	1	0	6	1	0	0	0	2	0	0	0	2	0	0	1	0	1	0	1	1	0.0959845	0.108259	0
ENSG00000162373	33	37	45	27	44	34	25	20	31	36	36	36	14	9	17	12	5	4	45	41	55	48	26	25	23	67	56	49	98	70	43	71	32	36	34	31	42	20	20	132	186	171	175	166	153	220	0.4976	0.629264	0.687953
ENSG00000197982	671	562	682	581	716	580	570	514	620	694	633	579	331	326	385	360	418	395	54	64	48	68	79	24	20	98	81	58	135	71	48	67	400	454	451	452	438	352	351	199	239	251	224	252	213	287	9.71424	9.17672	10.0104
ENSG00000261781	0	0	0	0	0	0	0	0	0	0	0	0	0	0	0	0	0	0	0	0	0	0	0	0	0	0	0	4	0	0	1	0	0	0	0	0	0	0	0	0	0	0	0	0	0	0	0	0	0
ENSG00000183317	0	1	0	0	0	0	0	0	0	0	0	0	0	0	0	0	0	0	0	0	1	0	0	1	1	0	0	0	0	0	1	0	0	0	0	0	0	0	0	0	0	0	0	0	0	0	0	0.00446876	0
ENSG00000250894	0	0	0	0	0	0	0	0	0	0	0	0	0	0	0	0	0	0	0	0	0	0	0	0	0	2	0	0	0	0	0	0	0	0	0	0	0	0	0	0	0	0	0	0	0	0	0	0	0
ENSG00000232022	24	21	27	14	38	22	37	33	35	29	33	31	30	18	39	31	42	24	29	27	36	17	32	23	6	16	31	11	8	7	10	4	32	12	25	24	25	9	27	15	15	19	11	7	18	14	0.313074	0.308972	0.357091
ENSG00000183386	134	107	94	100	122	105	103	69	97	98	93	89	60	52	62	67	62	65	11	7	26	8	17	2	12	26	20	15	9	24	10	15	82	76	93	114	137	86	85	13	20	16	11	17	14	15	2.1597	1.94508	1.53602
ENSG00000284743	0	0	0	0	0	0	0	0	0	0	0	0	0	0	0	0	0	0	0	0	0	0	0	0	0	0	0	0	0	0	1	0	0	0	0	0	0	0	0	0	0	0	0	0	0	0	0	0	0
ENSG00000229528	0	0	0	0	0	0	0	0	0	0	0	0	0	0	0	0	0	0	0	4	0	2	0	0	0	0	0	0	0	0	0	0	0	0	0	0	0	0	0	0	0	0	0	0	0	0	0	0	0
ENSG00000158315	37	23	30	43	41	41	48	18	50	32	35	34	20	34	39	30	35	41	2	6	6	4	2	4	3	8	6	6	2	6	0	3	4	2	15	14	8	5	9	15	8	11	5	22	7	6	0.422878	0.296488	0.347628
ENSG00000243749	0	0	0	0	3	0	0	0	0	0	0	0	0	0	1	2	2	0	0	0	0	0	1	0	0	0	0	0	0	0	0	0	0	0	0	0	0	0	0	0	0	0	0	0	0	0	0	0	0
ENSG00000204084	546	463	522	463	479	545	535	425	544	490	616	535	152	132	165	151	169	187	515	596	682	589	589	380	398	612	652	435	576	566	364	392	568	588	577	572	710	541	488	923	1136	1033	916	983	1102	1161	1.97482	1.88878	1.91419
ENSG00000286064	0	1	0	1	0	1	1	1	0	1	7	4	0	2	0	0	0	0	8	10	8	3	1	0	1	1	0	1	7	9	0	0	0	2	5	3	6	1	2	5	6	3	6	10	9	7	0	0.107461	0
ENSG00000235358	1	3	1	0	2	5	6	6	2	0	6	5	2	0	2	0	0	3	1	0	1	0	8	3	0	0	0	0	0	0	0	0	0	0	0	0	0	0	0	0	1	1	0	0	10	4	0.0143423	0.0485293	0.0145411
ENSG00000186973	0	0	0	0	0	0	4	0	0	0	1	0	0	0	0	0	0	0	0	0	0	0	2	4	2	0	0	0	0	0	0	0	0	0	0	0	0	0	0	3	5	6	0	3	4	4	0	0	0
ENSG00000271806	10	4	5	9	2	4	2	0	2	4	0	2	8	6	6	1	0	0	25	25	41	21	47	14	11	4	7	21	8	6	2	2	0	0	0	0	0	0	0	2	4	8	12	6	13	14	0.0769751	0.0347276	0.0390212
ENSG00000142698	0	0	0	0	0	0	0	0	0	0	0	0	0	0	0	0	0	0	2	0	0	1	4	0	1	0	0	0	0	0	0	0	0	0	0	0	0	0	0	0	0	0	0	0	0	0	0	0	0
ENSG00000272084	6	0	2	2	3	2	13	15	6	8	11	25	0	2	0	6	2	6	8	2	4	6	8	5	4	20	3	5	15	17	15	18	2	3	5	8	6	4	4	10	10	7	9	3	12	10	0.0569643	0	0.0192514
ENSG00000146463	455	413	512	396	455	396	471	339	483	514	532	474	446	436	600	443	551	575	389	391	399	398	412	273	252	423	390	244	322	372	239	197	524	607	537	549	626	532	508	605	928	748	669	742	733	853	1.85907	1.90326	2.12097
ENSG00000183520	2412	1939	2333	1950	2496	2305	1900	1886	2079	2067	2304	2038	2532	2432	3288	2731	3087	3374	635	586	715	665	770	489	419	717	647	459	636	637	469	484	2082	2271	2193	2243	2299	2227	2173	1030	1575	1406	1181	1277	1389	1595	23.0419	20.8922	22.5962
ENSG00000271164	0	0	0	0	0	0	4	1	1	2	0	0	0	0	0	0	0	0	0	0	0	0	0	0	0	0	0	0	0	0	0	0	0	0	0	0	0	0	0	0	0	0	0	0	0	0	0	0	0
ENSG00000090686	926	761	887	805	920	864	687	626	735	763	666	724	947	818	1109	921	1130	1233	1091	1173	1355	1080	1314	844	768	1387	1262	740	1141	1175	839	809	2346	2431	2534	2449	2726	2428	2272	891	1200	1108	989	1148	1133	1217	3.14927	2.9191	3.05846
ENSG00000085998	115	96	109	117	136	137	113	100	102	112	125	108	37	48	56	66	59	87	94	91	128	122	86	62	83	68	108	65	73	86	65	60	84	121	75	106	97	74	91	166	173	244	162	201	230	251	0.600155	0.565069	0.576729
ENSG00000271741	0	0	0	0	1	0	0	0	0	0	0	0	0	0	0	0	0	0	0	0	0	0	0	0	0	0	0	0	0	0	0	0	0	0	0	0	0	0	0	0	0	0	0	0	0	0	0	0	0
ENSG00000226957	21	23	8	6	22	16	11	13	21	27	26	21	14	14	26	11	7	23	0	2	5	3	9	2	2	6	14	2	4	5	2	0	27	22	12	17	15	13	15	21	16	14	18	23	12	19	1.04511	1.29102	0.403655
ENSG00000211454	6	2	4	7	5	4	18	10	15	18	9	9	12	2	0	11	7	10	12	8	21	14	11	6	11	14	11	17	29	5	8	13	30	8	5	10	4	10	6	20	15	47	31	12	21	54	0.0700118	0.0263217	0.0473216
ENSG00000214141	0	0	0	0	0	0	0	0	0	0	0	0	0	0	0	0	0	0	0	0	0	0	0	0	0	0	0	0	0	0	0	0	0	0	0	0	1	0	0	0	0	0	0	0	0	0	0	0	0
ENSG00000142686	213	155	165	155	184	135	154	143	181	163	154	222	98	116	125	85	115	101	26	45	42	31	44	36	15	32	14	10	25	20	18	15	109	153	142	116	116	119	110	97	172	131	134	145	151	147	2.25636	1.85193	1.77212
ENSG00000224751	0	0	0	0	0	0	11	4	9	4	12	10	0	0	0	0	0	0	3	2	6	0	4	3	2	2	11	4	4	8	4	15	0	0	0	0	0	0	0	0	0	0	0	0	0	0	0	0	0
ENSG00000279096	0	0	0	0	0	0	0	0	0	0	0	0	0	0	0	0	0	0	0	0	0	0	0	0	0	0	0	0	0	0	0	0	0	0	0	0	0	0	0	0	0	0	0	0	0	0	0	0	0
ENSG00000227857	0	4	3	4	4	8	5	1	3	7	11	4	4	2	9	6	6	9	3	4	8	14	5	1	0	4	6	9	9	6	3	4	0	0	4	2	6	8	2	0	3	6	0	0	2	0	0	0.429844	0.289792
ENSG00000230585	3	0	8	2	8	12	11	3	2	2	13	6	0	0	2	0	0	0	6	2	0	0	3	0	2	3	5	1	8	16	2	2	5	4	1	6	2	4	6	7	8	4	8	4	3	10	0.119478	0	0.323024
ENSG00000127125	8896	7620	8605	6997	9194	8280	7360	7170	7362	8393	8007	7709	10818	10698	13332	11916	13179	14489	4538	4490	5035	4486	5011	3249	3397	4776	4422	2995	4449	4476	3101	3219	3408	3901	3892	3859	4121	3645	3487	6159	8272	7982	6315	7366	7962	8762	84.2116	81.3573	82.5862
ENSG00000197429	503	406	420	372	490	466	418	431	416	461	516	450	478	451	572	554	536	664	542	486	556	466	507	388	323	528	434	297	486	410	269	315	314	327	308	378	322	249	273	302	426	407	299	327	429	372	4.38141	3.98875	3.70916
ENSG00000117000	776	691	814	639	808	755	856	869	865	989	1132	984	707	589	674	615	630	751	1499	1631	1732	1496	1607	1111	1123	1744	1551	1085	1527	1557	973	1105	791	879	912	842	997	778	880	946	1168	1164	1021	1161	1115	1387	4.0218	4.03926	4.27723
ENSG00000178585	42	30	25	29	48	27	34	10	46	27	38	18	9	19	26	24	16	12	43	32	52	35	42	17	25	53	41	45	36	32	29	19	23	24	19	24	29	16	17	16	20	19	16	26	17	30	0.406274	0.327307	0.245182
ENSG00000092853	153	106	135	110	156	142	140	170	177	155	203	166	51	81	104	117	97	119	83	77	90	56	90	55	51	87	45	32	67	75	60	72	891	915	836	928	1011	848	807	115	137	141	102	148	135	146	0.515245	0.402618	0.46093
ENSG00000236253	5	15	7	5	12	7	6	7	4	10	9	2	10	4	11	9	8	3	0	0	0	0	0	0	0	0	0	0	0	0	0	0	1	0	0	4	1	1	5	4	6	16	7	7	5	11	0.051041	0.172705	0.0724481
ENSG00000198754	8	1	2	2	2	8	2	2	4	4	0	0	2	0	4	0	0	2	2	0	6	2	2	2	0	3	2	2	6	8	2	2	2	2	0	2	2	0	0	4	10	4	2	12	12	4	0.141506	0.0199503	0.035867
ENSG00000134697	1165	1040	1123	836	1261	1058	1032	979	1121	1111	1191	1092	844	799	925	852	997	1100	792	774	864	765	773	599	542	945	848	641	857	809	581	603	850	896	835	857	891	812	766	1005	1328	1319	1110	1219	1326	1486	6.54743	6.59239	6.39888
ENSG00000187513	0	0	0	0	0	0	0	0	0	0	0	0	0	0	0	0	0	0	0	0	0	0	0	0	0	0	0	0	0	0	0	0	0	0	0	0	0	0	0	0	0	0	0	0	0	0	0	0	0
ENSG00000225142	0	0	0	0	0	0	0	0	0	0	0	2	0	0	0	0	0	0	0	0	0	0	0	0	0	0	0	0	0	0	0	0	0	0	0	0	0	0	0	0	0	0	0	0	0	0	0	0	0
ENSG00000230138	33	9	20	10	25	18	2	18	40	21	26	25	17	21	14	27	23	20	99	98	126	121	120	81	59	200	185	114	127	167	99	92	20	13	10	15	10	11	5	32	47	53	52	54	51	59	1.1424	0.351408	0.701962
ENSG00000230116	0	0	0	0	0	0	0	4	4	0	1	4	0	0	0	0	0	0	0	0	0	0	0	0	0	0	0	0	0	0	0	0	0	0	0	0	0	0	0	0	0	0	0	0	0	0	0	0	0
ENSG00000223390	0	0	0	0	0	0	0	0	0	0	0	2	0	0	0	0	0	0	2	2	2	0	6	2	3	9	0	1	2	4	2	1	2	1	2	2	1	4	0	0	0	0	0	0	0	0	0	0	0
ENSG00000285823	0	0	0	0	0	0	2	0	3	2	0	2	0	0	0	2	3	2	0	0	0	0	0	0	0	0	0	0	0	1	0	0	0	0	1	0	0	0	0	0	0	0	0	0	0	0	0	0	0
ENSG00000284720	0	0	0	0	0	0	0	0	0	0	0	0	0	0	0	0	0	0	0	0	0	0	0	0	0	0	0	0	0	0	0	2	0	0	0	0	0	0	0	0	0	0	0	0	0	0	0	0	0
ENSG00000286640	0	0	0	0	0	0	0	0	0	0	0	0	0	0	0	0	0	0	21	29	20	26	27	8	25	26	24	28	18	27	15	22	4	0	11	16	4	5	6	2	6	10	8	16	13	4	0	0	0
ENSG00000225671	4	1	4	2	4	3	0	0	2	4	0	2	2	3	0	4	0	2	1	2	0	1	1	0	3	1	1	0	1	1	1	0	4	2	2	3	4	2	1	0	7	5	0	0	0	2	0.217135	0.0612257	0.220145
ENSG00000116151	36	43	52	42	49	50	39	49	36	40	58	45	11	29	28	20	39	26	13	11	9	6	11	12	10	13	22	12	27	23	16	20	15	13	12	26	15	30	21	37	64	22	43	39	36	36	0.102563	0.138172	0.1502
ENSG00000226147	0	0	0	0	0	0	0	0	0	1	0	1	0	0	0	0	0	0	0	0	0	0	0	0	0	0	0	0	0	0	0	0	0	0	0	0	0	0	0	0	0	0	0	0	0	0	0	0	0
ENSG00000182873	20	17	34	2	4	7	7	9	6	19	5	6	4	2	6	6	1	3	2	0	2	0	2	0	0	12	14	2	14	17	7	8	10	18	18	22	8	5	16	20	40	18	23	31	29	19	0.372535	0.35715	0.642089
ENSG00000286518	0	0	0	2	2	0	0	2	0	0	0	0	0	0	0	0	0	0	0	0	0	0	0	0	0	0	0	0	0	0	0	0	0	0	0	0	0	0	0	0	0	0	0	0	0	0	0	0	0
ENSG00000178715	1	1	2	1	5	1	1	10	1	0	3	2	2	2	3	5	0	4	2	1	1	2	3	0	0	3	10	2	7	3	4	5	3	7	11	4	5	3	2	9	9	6	7	4	3	2	0.0737415	0.0831719	0.149528
ENSG00000006555	44	74	66	61	73	74	73	55	68	45	51	52	67	52	49	74	72	61	128	158	180	159	220	107	91	99	85	58	92	84	40	45	326	399	364	372	376	315	282	125	182	205	165	143	185	218	0.232555	0.441134	0.353669
ENSG00000236111	0	0	0	0	0	0	0	0	0	0	0	0	0	0	0	0	0	0	0	0	0	0	0	0	0	0	0	0	0	0	0	0	0	0	0	0	0	0	0	0	0	0	0	0	0	0	0	0	0
ENSG00000066056	4	1	6	6	4	2	4	8	6	5	14	12	0	2	1	0	4	0	4	7	7	14	16	3	10	0	2	4	0	2	0	2	33	30	21	28	33	21	7	6	4	2	10	11	12	2	0.0192685	0.00543315	0.0293034
ENSG00000214114	631	586	598	567	738	633	635	620	700	684	774	684	850	858	1047	904	881	1069	258	222	217	225	222	126	143	316	260	181	278	295	136	175	1316	1362	1250	1370	1455	1250	1209	717	1110	1052	913	1001	1084	1251	7.34963	7.69837	7.06182
ENSG00000173436	190	179	176	112	183	178	205	185	197	240	192	213	165	185	215	204	253	228	307	286	336	270	323	236	183	330	313	194	299	362	214	244	236	311	234	318	280	243	252	208	301	275	197	248	214	235	1.11985	1.18994	1.05171
ENSG00000116544	1	5	2	1	2	2	0	3	0	0	3	2	0	4	0	2	1	0	1	2	6	0	7	0	0	7	0	2	3	1	0	2	2	7	2	6	5	3	0	0	1	0	2	0	2	1	0.00799079	0.0450635	0.0162031
ENSG00000236723	2	3	3	2	3	1	2	1	5	1	3	0	1	0	1	1	0	3	1	2	3	1	1	0	1	0	2	0	0	9	0	0	3	0	6	1	1	0	2	0	5	9	9	3	1	7	0.0526467	0.0890692	0.0800649
ENSG00000232467	0	0	0	0	0	0	0	0	0	0	0	0	0	0	0	0	0	0	0	0	0	0	0	0	0	0	0	0	0	0	0	0	0	0	2	6	4	2	0	0	0	0	0	0	0	0	0	0	0
ENSG00000186094	1	0	0	0	0	0	0	0	0	0	0	0	0	0	0	0	0	0	0	0	1	0	0	0	0	2	0	0	0	3	2	0	0	0	0	0	0	0	0	5	2	5	3	9	9	21	0.00430421	0	0
ENSG00000117016	39	31	32	23	38	40	18	16	29	27	24	32	12	24	32	36	12	22	19	5	10	14	9	6	11	12	9	3	4	5	6	6	5	14	7	1	10	13	7	20	43	22	20	25	15	23	0.17353	0.155574	0.144357
ENSG00000270241	0	0	0	0	0	0	0	0	0	0	0	0	0	0	0	0	0	0	0	0	0	0	0	0	0	1	0	0	0	0	0	0	0	0	0	0	0	0	0	0	0	0	0	0	0	0	0	0	0
ENSG00000121310	584	496	591	490	594	652	507	544	549	611	674	571	358	314	374	377	414	499	610	558	650	617	638	403	390	827	691	508	631	681	394	503	327	366	390	419	454	351	338	742	971	1077	737	900	920	981	1.63001	1.56144	1.67242
ENSG00000169213	28	34	28	24	21	27	8	11	14	2	10	11	4	13	19	22	21	20	8	4	0	3	4	0	1	2	2	2	0	4	5	2	121	144	136	120	127	118	127	10	15	20	21	13	14	6	0.0707641	0.0969168	0.0717452
ENSG00000229846	0	0	0	0	0	0	0	0	0	0	0	0	0	0	0	0	0	0	0	2	0	0	0	0	0	0	0	0	0	0	0	0	0	0	0	0	0	0	0	0	0	0	0	0	0	0	0	0	0
ENSG00000163866	2210	2057	2295	1960	2454	2389	2011	1728	1976	2174	2168	2134	1213	1262	1529	1394	1568	1631	886	892	934	916	986	583	593	1233	1100	776	1129	1213	695	832	1869	2251	2091	1995	2281	1755	1739	1191	1593	1563	1322	1377	1595	1562	6.90532	7.24921	7.27032
ENSG00000225779	4	3	0	1	5	2	8	13	4	4	5	1	4	8	0	11	0	10	22	30	39	20	25	18	22	36	18	16	12	26	8	12	2	0	1	4	3	0	2	4	11	6	6	5	6	4	0.349176	0.295373	0
ENSG00000236546	0	0	0	0	0	0	0	0	0	0	0	0	0	0	0	0	0	0	0	0	1	0	0	0	0	0	0	0	0	0	0	0	0	0	0	0	0	0	0	0	0	0	0	0	0	0	0	0	0
ENSG00000228436	194	167	220	158	172	193	149	135	175	199	207	149	126	118	147	117	158	182	9	9	14	8	5	4	3	11	10	8	12	23	9	8	24	22	31	27	21	27	15	17	39	22	33	17	19	21	3.12673	3.03577	3.59493
ENSG00000284601	2	2	0	0	6	2	0	4	4	1	0	0	6	7	2	0	2	2	4	1	2	1	1	0	0	2	2	2	4	2	0	0	0	0	0	0	0	0	0	0	0	0	0	0	0	0	0.037275	0.0420419	0
ENSG00000049249	297	193	272	257	322	309	231	259	278	270	241	247	187	138	213	220	203	214	113	119	147	141	156	71	87	288	282	124	277	228	186	139	134	176	185	190	168	154	139	91	156	136	113	110	136	115	1.50972	1.10652	1.4018
ENSG00000284719	34	28	52	13	69	26	37	34	32	55	81	47	35	34	47	36	53	63	30	36	37	38	28	20	20	44	51	18	44	28	35	34	2	3	8	7	3	2	3	55	65	59	35	71	54	64	0.629678	0.584874	0.976388
ENSG00000237130	2	0	0	0	0	0	0	0	0	0	0	0	0	0	0	0	0	0	0	4	3	0	2	0	3	2	0	2	0	0	0	0	0	0	0	0	0	0	0	0	2	0	0	2	4	0	0.174588	0	0
ENSG00000171793	454	472	486	370	453	488	442	481	437	466	526	414	357	396	422	391	396	546	2526	2630	2865	2570	3052	1770	1729	2382	2105	1393	2052	2245	1290	1348	1763	2189	1981	1933	2095	1830	1755	1281	1668	1631	1313	1419	1529	1813	1.31348	1.54019	1.42555
ENSG00000116990	47	36	40	36	50	36	31	25	8	25	21	26	12	13	17	17	24	26	8	14	3	10	2	0	6	6	10	2	6	4	4	4	2	6	7	9	13	9	5	10	7	16	9	11	18	17	0.299831	0.259027	0.258713
ENSG00000236876	7	0	4	7	4	3	2	4	8	6	6	6	6	1	5	4	11	6	2	6	3	3	3	1	7	7	7	6	8	3	1	0	3	7	3	6	5	8	4	0	15	6	8	3	4	5	1.67475	0	0.970268
ENSG00000226133	0	0	0	0	0	0	0	0	0	0	0	0	0	0	0	0	0	0	3	6	7	6	5	3	3	0	3	2	1	2	0	0	0	0	0	0	0	0	0	0	0	0	0	0	0	0	0	0	0
ENSG00000227416	5	2	3	2	2	0	6	1	0	6	1	0	6	0	2	0	2	0	8	4	2	8	0	10	6	2	2	6	6	6	0	1	6	3	6	8	6	8	6	4	2	10	2	2	5	2	0.376443	0.169834	0.228997
ENSG00000232335	0	0	0	0	0	0	0	0	0	0	0	0	0	0	0	0	0	0	0	0	0	0	0	0	0	0	0	0	0	1	0	0	0	0	0	0	0	0	0	0	0	0	0	0	0	0	0	0	0
ENSG00000260971	676	578	529	516	628	558	598	560	594	702	691	666	344	315	426	365	449	434	9	8	14	13	13	10	13	7	19	9	12	5	9	6	5	12	11	19	16	21	10	41	37	76	30	33	55	33	2.77151	2.67278	2.1989
ENSG00000274386	58	33	29	45	22	41	61	85	100	64	95	82	30	52	61	49	51	63	82	78	78	65	90	80	74	39	32	25	33	40	16	11	60	40	43	26	31	47	42	21	17	21	40	19	21	33	0.428385	0.274907	0.217162
ENSG00000284696	0	0	0	0	0	0	0	0	0	0	0	0	0	0	0	0	0	0	0	0	1	0	0	0	0	6	4	0	11	8	4	3	0	0	0	0	0	0	0	0	0	0	0	0	0	0	0	0	0
ENSG00000238242	0	0	0	0	0	0	0	0	0	0	0	0	0	0	0	0	0	0	7	15	12	14	24	14	15	7	10	1	9	10	6	1	0	0	0	0	0	0	0	0	0	0	0	0	0	0	0	0	0
ENSG00000237290	0	0	0	0	0	0	0	0	0	0	0	0	0	0	0	0	0	0	2	0	0	0	1	2	0	0	0	0	0	0	0	0	0	0	0	0	0	0	0	0	0	0	0	0	0	0	0	0	0
ENSG00000232762	0	0	0	0	0	0	0	0	0	0	0	0	0	0	0	0	0	0	0	0	0	0	0	0	0	0	0	0	0	0	0	0	0	0	0	0	0	0	0	1	0	0	0	0	0	0	0	0	0
ENSG00000117419	763	667	778	633	887	782	669	664	726	736	813	738	592	541	664	604	703	710	467	544	484	476	502	266	261	599	584	438	510	501	352	405	554	703	646	667	780	589	532	956	1221	1169	989	1063	1072	1168	8.84882	8.72472	9.14787
ENSG00000162384	1362	1250	1401	1113	1426	1368	1255	979	1274	1331	1336	1131	1731	1653	2136	1688	2029	2262	760	752	770	775	772	509	505	933	803	603	791	908	507	639	1437	1570	1345	1482	1567	1372	1347	2118	2997	3012	2352	2618	2805	3213	9.76708	10.1103	10.186
ENSG00000162391	0	0	1	0	0	1	1	0	6	0	2	3	0	0	0	0	0	0	0	2	0	0	0	3	0	0	5	0	2	2	1	1	0	0	0	0	0	0	0	0	0	2	0	0	0	0	0	0	0.0163243
ENSG00000174348	0	0	0	0	0	0	0	0	0	0	0	0	0	0	0	0	0	0	7	11	12	4	4	2	1	1	6	8	3	7	4	10	0	0	0	0	0	0	0	0	0	0	0	0	0	0	0	0	0
ENSG00000117859	2867	2743	3064	2498	3140	2846	2562	2444	2529	2595	2913	2730	2161	2299	2739	2415	2498	2748	2295	2130	2427	2148	2389	1539	1484	2830	2704	1688	2446	2695	1787	1851	2117	2425	2149	2285	2482	2132	2288	2445	3316	3274	2574	3042	3154	3373	9.01398	9.72701	9.76691
ENSG00000228121	0	2	0	2	0	0	2	0	1	0	1	0	0	0	0	0	0	0	0	0	0	0	0	0	0	0	0	0	0	1	0	0	0	0	0	1	0	0	0	0	2	0	2	0	0	0	0	0.0889604	0
ENSG00000253313	2	0	2	6	4	0	0	0	0	0	0	0	2	0	0	6	6	2	2	0	0	0	0	0	0	0	0	0	0	0	0	0	0	0	0	0	0	0	0	0	0	0	0	0	0	0	0.0424425	0	0.0430309
ENSG00000040487	265	235	249	205	316	275	323	268	288	308	272	300	110	144	181	136	119	183	31	30	35	32	33	18	18	45	39	35	46	45	34	31	94	98	104	117	92	82	76	72	68	68	66	70	80	83	3.18659	3.18722	3.0357
ENSG00000162396	58	50	49	90	70	54	49	26	33	54	42	74	22	2	20	14	16	25	8	12	6	8	2	14	8	19	18	18	12	30	9	9	38	21	21	17	33	52	25	22	36	23	12	24	13	24	0.795131	0.773118	0.681062
ENSG00000203995	0	1	0	1	0	1	4	0	4	6	4	4	4	0	4	4	0	0	22	26	19	23	19	17	19	21	9	11	13	11	4	21	0	2	0	0	0	2	0	7	19	6	8	9	18	6	0	0.00776082	0
ENSG00000227742	11	15	7	8	27	14	8	6	8	15	7	12	3	0	0	3	4	0	9	7	9	4	8	7	9	4	2	5	5	7	3	3	2	11	11	23	6	11	13	2	3	2	2	2	2	9	0.131393	0.202086	0.0847729
ENSG00000117713	1213	1129	1035	1015	1304	1159	1353	1450	1579	1532	1618	1549	644	649	791	740	810	847	1582	1560	1746	1548	1677	1074	954	1979	1848	1230	1731	1923	1123	1171	1461	1454	1421	1498	1514	1300	1183	1594	2320	2311	1879	2015	2042	2522	2.45802	2.58038	2.1264
ENSG00000177868	625	528	597	490	569	584	428	417	528	528	443	551	744	683	805	704	866	943	384	408	398	336	454	261	246	438	417	274	359	412	310	319	579	644	643	609	679	517	598	524	811	774	609	642	762	766	14.92	14.2163	14.4491
ENSG00000284686	13	10	19	6	24	19	15	22	10	6	8	21	3	8	11	9	5	4	0	1	0	0	2	0	0	0	1	3	0	3	0	0	0	0	0	0	0	0	0	0	0	0	0	0	0	0	0.158148	0.13721	0.234344
ENSG00000162378	386	425	517	379	463	410	452	402	382	415	443	455	475	447	535	530	560	671	240	258	336	271	266	205	233	350	288	203	263	340	203	188	422	509	458	471	459	429	448	401	496	477	426	506	462	524	1.51929	1.88672	2.06312
ENSG00000233079	0	0	0	0	0	0	2	6	0	8	2	2	0	0	0	0	0	0	0	0	0	0	0	0	0	0	0	0	0	0	0	0	0	0	0	0	0	0	0	0	0	0	0	0	0	0	0	0	0
ENSG00000162599	706	569	671	482	662	582	874	862	869	842	1021	922	727	681	912	754	851	954	2811	2751	3012	2861	2979	2072	1967	2132	1933	1306	1788	1966	1177	1162	1096	1185	1180	1211	1286	1156	1173	2416	3424	3105	2443	2776	3188	3471	0.408026	0.370903	0.393174
ENSG00000259818	8	13	14	13	8	8	11	18	9	11	10	18	4	2	8	2	8	10	2	0	0	3	0	0	0	5	2	4	4	4	0	2	3	2	4	12	7	4	11	12	13	18	8	14	2	10	0.0719549	0.13188	0.127667
ENSG00000229444	2	2	12	2	2	6	4	2	7	15	3	6	0	0	1	1	0	1	9	18	24	17	17	16	9	11	9	8	21	17	7	9	0	18	7	0	7	9	6	6	9	14	5	12	12	7	0.137735	0.155349	0.837865
ENSG00000240563	18	10	25	29	37	31	8	4	14	13	13	13	16	20	18	21	21	23	4	0	0	1	0	0	2	8	5	2	13	0	8	1	0	3	12	12	5	0	6	18	10	22	17	22	13	12	0.151756	0.0950908	0.213695
ENSG00000234318	0	0	2	0	0	0	2	0	5	0	1	0	0	0	0	0	0	0	0	1	0	0	0	0	0	0	0	0	0	0	0	0	0	0	0	0	0	0	0	1	0	0	1	4	0	0	0	0	0.146517
ENSG00000284773	4	2	11	2	5	2	20	18	17	21	4	8	8	10	10	17	18	13	29	26	48	30	52	10	24	58	57	37	88	67	36	38	28	46	37	24	67	34	31	42	89	65	43	72	54	66	0.0408457	0.0230347	0.113883
ENSG00000117862	648	591	572	514	673	660	522	514	515	592	581	511	656	619	748	701	773	863	207	239	227	228	233	147	147	268	253	218	258	218	175	178	411	467	453	480	467	340	383	393	546	466	352	397	416	464	7.30782	7.51736	6.54016
ENSG00000162551	0	0	0	0	0	1	0	0	0	0	0	0	0	0	1	0	0	0	37	29	46	37	23	17	24	35	51	8	46	39	16	26	0	0	0	0	6	2	2	12	22	18	10	13	18	22	0	0	0
ENSG00000235612	0	0	0	0	0	2	4	0	0	2	0	1	0	0	0	0	0	0	0	0	0	0	0	0	0	0	0	0	0	0	0	0	0	0	0	0	0	0	0	0	0	0	0	0	0	0	0	0	0
ENSG00000228369	0	2	4	0	0	0	0	5	0	0	0	4	0	0	0	0	0	0	0	0	0	0	0	0	0	7	4	4	7	11	2	6	4	14	0	3	4	4	4	2	1	2	0	1	1	6	0	0.186339	0.335003
ENSG00000183431	6289	5512	6149	5049	6411	5911	5401	4968	5271	5559	5846	5486	5433	5387	7101	6036	6877	7199	1892	1988	2320	1959	2215	1415	1320	2580	2366	1526	2188	2368	1590	1579	5471	6144	5734	5950	6554	5493	5248	4674	6572	6336	5165	5649	5790	6588	52.1641	51.5661	51.7099
ENSG00000227485	0	0	0	0	0	0	0	0	0	0	0	0	0	0	0	0	0	0	0	0	1	0	0	0	0	0	0	0	0	0	0	0	0	0	0	0	0	0	0	0	0	0	0	0	0	0	0	0	0
ENSG00000224609	52	39	69	37	42	42	74	78	64	76	93	63	30	37	58	47	66	82	53	75	88	74	81	74	44	38	32	38	48	29	20	34	14	30	18	14	27	23	7	22	18	32	16	21	20	19	0.221545	0.187408	0.298049
ENSG00000235545	19	35	16	35	31	30	63	64	34	72	57	47	16	18	24	30	28	34	4	0	0	4	6	0	2	35	49	14	63	44	13	26	11	9	2	22	5	2	6	64	73	84	68	69	79	89	0.499737	1.03829	0.426665
ENSG00000236646	0	0	0	0	0	0	0	0	0	0	0	0	0	0	0	0	0	0	2	2	0	0	2	6	1	0	0	0	2	0	0	0	0	0	0	0	0	2	0	0	0	2	0	0	0	0	0	0	0
ENSG00000169174	0	0	0	0	0	0	0	0	0	0	0	0	0	0	0	0	0	0	2	0	0	0	0	0	0	0	0	0	0	0	0	0	0	0	0	2	0	0	0	0	0	0	0	4	0	0	0	0	0
ENSG00000231252	0	0	0	0	0	0	0	0	0	0	0	0	0	0	0	0	0	0	2	2	1	2	9	3	5	2	0	0	2	0	0	0	0	0	0	0	0	0	0	0	0	0	0	0	0	0	0	0	0
ENSG00000236180	4	2	2	5	2	4	0	1	0	2	4	1	0	0	0	0	0	0	0	0	0	0	0	0	0	0	0	2	1	1	0	0	0	0	0	0	0	0	0	0	1	0	0	0	0	0	0.306877	0.173061	0.155566
ENSG00000231622	0	0	0	0	0	0	0	0	0	0	4	0	0	0	0	0	0	0	0	0	0	0	0	0	0	3	5	4	0	0	0	0	0	0	0	0	0	0	0	0	0	0	0	0	0	0	0	0	0
ENSG00000238063	0	0	0	0	0	1	0	0	0	0	0	0	0	0	0	0	0	0	4	12	5	6	15	2	2	8	3	3	2	7	5	0	0	0	0	0	0	0	0	0	2	0	0	0	0	0	0	0	0
ENSG00000235804	0	0	0	0	0	0	0	0	0	0	0	0	0	0	0	0	0	0	0	0	2	0	0	0	0	0	0	0	0	0	0	0	0	0	0	0	0	0	0	0	0	0	0	0	0	0	0	0	0
ENSG00000243725	12	6	12	11	10	18	12	18	18	12	12	13	5	9	8	3	11	11	8	2	8	8	10	6	11	12	15	5	14	7	9	7	7	11	1	10	5	5	9	12	17	18	8	15	12	9	0.11112	0.0626651	0.11266
ENSG00000116985	28	26	30	19	28	19	44	17	27	22	18	16	28	30	35	19	33	66	2	19	10	13	11	14	8	12	12	15	16	6	9	10	13	14	29	13	36	22	20	39	45	43	43	24	30	44	0.187394	0.196262	0.203563
ENSG00000134716	30	11	23	22	42	23	26	22	24	29	38	12	24	33	20	5	22	28	42	29	43	57	54	19	24	83	102	82	79	91	64	79	47	41	35	40	46	40	28	112	125	118	101	113	89	153	0.325921	0.134787	0.253337
ENSG00000171872	0	0	0	0	0	0	0	0	0	0	0	0	0	0	0	0	0	0	0	1	0	0	0	0	0	0	0	0	0	0	0	0	0	0	0	0	0	0	0	0	0	0	0	0	0	0	0	0	0
ENSG00000162407	1315	1077	1366	1031	1467	1449	1213	1226	1336	1470	1516	1300	1278	1224	1579	1200	1424	1550	45	51	48	52	51	39	27	52	41	52	53	65	26	42	28	57	20	49	26	31	51	10	13	20	6	8	14	17	8.05631	7.44202	8.48479
ENSG00000285079	0	0	0	0	0	0	0	0	0	0	0	0	0	0	0	0	0	0	4	3	2	10	2	12	1	6	3	6	9	4	0	6	0	0	0	0	0	0	0	0	0	0	0	0	0	0	0	0	0
ENSG00000169218	0	0	0	0	0	0	2	0	0	0	0	0	0	0	0	0	0	0	2	0	0	1	0	0	0	0	2	0	0	1	0	1	0	0	0	0	0	0	0	0	0	0	0	0	0	0	0	0	0
ENSG00000163877	550	410	530	390	526	476	506	453	503	497	464	469	354	383	473	449	426	594	631	734	736	650	712	467	518	788	679	406	599	680	376	397	450	540	584	593	598	459	450	394	485	547	319	428	469	462	3.10674	2.6121	3.03527
ENSG00000228929	42	31	46	29	33	39	45	25	59	37	27	32	19	27	41	39	41	46	24	55	33	39	51	29	29	48	39	29	60	61	38	36	67	43	40	39	45	41	30	32	38	49	43	34	44	50	2.98142	2.482	3.31064
ENSG00000224570	0	0	0	0	0	0	0	0	0	0	0	0	0	0	0	0	0	0	0	0	0	0	0	0	0	0	0	0	0	0	0	0	0	0	0	0	0	0	0	0	0	0	0	0	0	2	0	0	0
ENSG00000185031	0	0	0	0	2	0	0	2	0	4	0	0	0	0	0	0	0	0	0	5	0	0	0	0	0	6	2	0	2	2	4	0	0	0	0	2	3	6	1	2	2	0	0	2	2	3	0	0	0
ENSG00000278967	0	0	0	0	0	0	0	0	0	0	0	0	0	0	0	0	0	0	0	0	0	0	0	0	0	1	0	1	0	0	3	1	0	0	0	0	0	0	0	0	0	0	2	0	0	0	0	0	0
ENSG00000157184	142	120	162	108	149	104	106	98	101	89	128	83	62	39	64	44	53	54	82	91	116	93	81	82	68	98	108	86	114	110	61	89	141	123	153	125	127	133	109	171	258	223	220	209	235	210	0.454597	0.433295	0.525814
ENSG00000272491	0	0	0	0	0	0	0	0	0	0	0	0	0	0	0	0	0	0	0	0	0	0	0	0	0	0	0	0	0	0	0	0	0	0	0	0	0	0	0	0	0	0	0	0	0	0	0	0	0
ENSG00000198815	890	800	835	697	870	791	835	947	972	1016	987	1024	739	640	923	737	863	952	1417	1445	1458	1342	1448	967	926	1433	1338	893	1297	1292	834	846	1586	1679	1647	1614	1729	1529	1560	1413	2108	1837	1625	1798	1868	2171	4.16849	4.22614	3.96511
ENSG00000134744	1423	1296	1379	1226	1494	1293	1801	1777	1922	1997	2203	1955	821	790	1067	927	1029	1079	5786	5938	6540	5745	6625	4242	4061	5504	5003	3558	5005	5339	3419	3500	3717	3888	3688	3769	4214	3662	3546	4010	5424	4993	4024	4633	5149	5839	2.83728	2.91452	2.78767
ENSG00000162437	14	4	26	11	15	18	27	17	25	37	16	24	31	30	27	19	41	32	67	84	83	60	64	40	31	102	106	52	94	107	90	76	48	58	40	69	58	51	66	61	109	77	64	83	62	90	0.0744947	0.0240061	0.140265
ENSG00000233910	0	0	0	0	0	0	0	0	0	0	0	0	0	0	0	0	0	0	0	0	0	0	2	0	0	0	0	0	0	0	0	0	0	0	0	0	0	0	0	0	0	0	0	0	0	0	0	0	0
ENSG00000287703	0	0	0	0	0	0	0	0	0	0	0	0	0	0	0	0	0	0	4	0	2	2	2	0	0	0	0	0	0	0	0	0	0	0	0	0	0	0	0	0	0	0	0	0	0	0	0	0	0
ENSG00000229294	0	0	0	0	0	0	0	0	0	0	0	0	0	0	0	0	0	0	0	0	0	0	0	0	0	0	0	0	0	0	0	0	0	0	0	0	0	0	0	0	0	0	0	0	0	0	0	0	0
ENSG00000184292	37	39	37	41	36	67	27	32	34	50	37	32	44	58	81	51	66	53	6	2	0	4	2	8	2	0	2	0	0	0	0	0	29	70	46	36	54	50	41	2	8	2	8	2	4	0	0.656623	0.780628	0.665727
ENSG00000187140	0	0	4	6	0	1	0	1	0	0	0	0	0	0	0	0	0	0	0	0	0	0	1	0	0	0	0	0	0	0	0	0	0	0	0	0	1	0	0	0	0	0	0	0	0	0	0	0	0.0511265
ENSG00000226754	28	18	41	17	27	24	29	21	34	27	34	31	37	40	51	20	34	24	4	3	2	6	6	2	2	0	0	0	0	1	0	0	8	2	2	4	0	3	6	7	2	4	4	3	8	10	0.465928	0.33783	0.69171
ENSG00000279324	0	0	0	0	0	0	0	0	0	0	2	0	0	0	0	0	0	0	0	0	2	0	0	0	0	0	0	0	0	0	0	0	0	0	0	0	0	0	0	0	0	0	0	0	0	0	0	0	0
ENSG00000186409	103	72	102	82	111	88	135	133	131	160	138	140	56	50	60	64	55	64	137	80	128	90	123	95	70	74	108	21	76	67	45	44	145	152	166	153	154	154	123	192	222	216	143	227	231	273	0.131983	0.104059	0.132514
ENSG00000236973	2	0	2	0	0	3	6	2	0	4	4	4	0	0	0	0	0	0	12	7	0	10	16	2	8	23	17	11	28	21	6	15	0	0	0	0	0	0	0	0	0	0	0	0	0	0	0.0645975	0	0.0654931
ENSG00000162595	0	0	0	0	0	0	0	0	0	2	0	0	3	7	8	3	10	4	0	0	0	0	0	0	0	0	0	0	0	0	0	0	0	0	0	0	0	0	0	1	3	0	0	0	0	0	0	0	0
ENSG00000271200	0	0	0	0	0	0	2	5	2	1	0	2	0	2	5	1	0	2	2	1	1	1	0	1	0	0	0	0	0	0	0	0	3	6	0	1	0	2	2	2	13	10	5	10	5	8	0	0	0
ENSG00000235446	0	0	0	0	0	0	0	0	0	0	0	0	0	0	0	0	0	0	1	0	0	0	0	1	0	0	0	0	0	0	0	0	0	0	0	0	0	0	0	0	0	0	0	0	0	0	0	0	0
ENSG00000224209	0	0	0	0	0	0	4	0	0	0	0	0	0	0	0	0	1	0	0	0	0	0	0	0	0	0	0	0	0	0	0	0	1	2	0	0	0	0	0	0	0	0	0	0	0	0	0	0	0
ENSG00000171357	13	9	16	8	6	6	4	5	1	4	7	6	0	0	0	0	0	0	2	6	9	2	14	8	0	0	0	0	0	0	0	0	0	4	0	2	0	6	2	0	0	0	2	0	0	0	0.227087	0.177319	0.283367
ENSG00000237853	0	0	0	2	0	0	0	0	2	0	1	1	2	1	9	5	4	5	6	4	3	3	3	2	2	1	4	2	0	4	0	0	0	0	0	0	0	0	0	3	4	5	1	1	4	3	0	0	0
ENSG00000162385	981	950	1025	871	1187	982	940	892	1008	1258	1126	995	999	852	1210	1042	1152	1334	1020	1010	1163	1009	1131	738	759	998	891	591	855	876	664	748	966	1188	1118	1086	1254	1133	1053	1035	1371	1369	1116	1309	1417	1419	23.2466	25.3909	24.626
ENSG00000234264	0	0	0	0	0	0	0	0	0	0	0	0	0	0	0	0	0	0	0	0	0	0	0	0	0	0	0	0	0	0	0	1	0	4	4	5	2	2	0	0	0	0	0	0	0	0	0	0	0
ENSG00000242391	0	4	0	3	0	2	2	1	3	3	1	1	0	0	0	0	0	0	11	3	7	10	12	4	3	2	1	0	3	3	5	0	5	0	0	2	2	0	2	1	0	0	0	0	1	0	0	0.383466	0
ENSG00000086015	107	105	103	81	83	123	79	92	125	114	124	115	103	107	117	128	165	136	56	55	77	61	56	30	31	91	65	47	48	80	43	42	254	256	264	297	313	188	236	81	115	87	76	69	80	67	0.428674	0.474458	0.418369
ENSG00000223883	0	0	0	0	0	0	0	0	0	0	0	0	5	1	1	3	1	0	0	0	0	0	0	0	0	0	0	0	0	0	0	0	0	0	0	0	2	0	1	0	0	0	0	0	0	0	0	0	0
ENSG00000284808	0	0	0	0	0	0	0	0	0	0	0	0	0	0	0	0	0	0	0	0	0	0	0	0	0	0	0	0	0	0	0	0	0	0	0	0	0	0	0	0	0	0	0	0	0	0	0	0	0
ENSG00000184588	3916	3651	3883	3301	3989	3794	3621	3467	3588	4043	4062	3841	1942	2121	2506	2103	2480	2760	13045	13717	14830	12869	14691	9086	8887	16918	15223	10492	14891	15737	9459	10310	5930	6843	6344	6648	7012	6017	5698	2445	3304	3128	2469	2906	2898	3354	14.1637	14.894	14.2391
ENSG00000242267	0	0	0	0	0	0	0	0	0	0	0	0	0	0	0	0	0	0	0	0	0	0	0	0	0	0	0	0	0	0	0	0	0	0	0	0	0	0	0	0	0	0	0	0	0	0	0	0	0
ENSG00000237227	0	0	0	0	0	0	0	0	0	0	0	0	0	0	0	0	0	0	0	0	0	0	0	0	0	0	0	0	0	0	0	0	0	0	0	0	0	0	0	0	0	0	0	0	0	0	0	0	0
ENSG00000117472	11	6	1	5	2	4	4	8	2	0	1	1	0	0	0	0	0	0	8	9	2	7	11	4	5	2	4	1	4	2	5	1	2	0	0	1	1	2	1	8	4	4	8	6	7	11	0.14991	0.0922261	0.0138171
ENSG00000275350	0	0	0	0	0	0	0	0	0	0	0	0	0	0	0	0	0	0	0	0	0	0	0	0	0	0	0	0	1	0	0	0	0	0	0	0	0	0	0	0	0	0	0	0	0	0	0	0	0
ENSG00000116652	4	0	2	1	0	0	13	13	12	16	24	13	0	0	0	0	1	0	7	8	11	13	6	14	2	13	11	5	10	17	8	0	4	3	1	1	3	4	2	11	8	2	6	8	8	19	0.0363418	0	0.0184228
ENSG00000123080	75	29	33	37	45	59	42	54	57	39	57	45	21	26	31	28	26	21	48	32	68	56	51	39	37	36	25	17	48	49	25	18	54	53	51	59	60	49	55	52	73	75	47	65	79	64	0.802653	0.35005	0.358064
ENSG00000177452	0	0	0	0	0	0	0	0	0	0	0	0	0	0	0	0	0	0	2	0	0	0	0	0	0	0	0	0	0	0	0	0	0	0	0	0	0	0	0	0	0	0	0	0	0	0	0	0	0
ENSG00000077549	3130	2960	2865	2563	3257	2882	2587	2719	2668	2966	2872	2718	1936	1829	2344	2050	2247	2334	3129	3161	3383	3198	3584	2048	2163	4715	4507	2948	4471	4444	2925	3303	3319	3782	3597	3928	3818	3215	3035	2550	3525	3369	2786	3040	3048	3443	5.2946	5.64736	4.91353
ENSG00000225675	6	15	1	11	5	6	4	10	9	8	2	4	4	0	2	3	7	0	0	1	0	0	0	0	0	0	2	0	3	0	0	2	1	5	1	3	0	0	0	1	7	2	3	10	12	21	0.341786	0.963738	0.0577541
ENSG00000162598	0	1	0	0	0	0	0	0	0	0	0	0	0	0	0	0	0	0	6	6	6	0	8	5	2	9	7	4	4	5	2	4	0	0	0	0	0	0	0	0	0	0	0	0	0	0	0	0.0082382	0
ENSG00000162415	14	15	28	34	22	21	26	47	20	28	19	30	25	31	49	54	33	53	42	37	47	23	28	26	14	14	27	19	12	25	20	8	19	16	29	31	45	41	37	77	82	114	57	86	67	105	0.0741891	0.0896537	0.150435
ENSG00000229133	0	0	0	0	0	0	0	0	0	0	2	0	0	1	0	2	0	0	0	0	0	0	0	0	0	0	2	0	0	0	0	0	0	0	0	0	0	0	1	0	0	0	0	3	0	1	0	0	0
ENSG00000185483	2	6	0	0	7	4	8	11	18	9	17	7	0	0	1	1	2	3	12	11	24	24	32	16	24	21	19	10	13	10	15	12	16	18	11	10	16	22	12	41	25	17	19	19	16	59	0.00961273	0.0325262	0
ENSG00000162600	822	714	776	722	909	785	768	745	749	819	837	703	921	859	1024	861	986	1002	349	343	373	308	360	250	290	303	334	213	268	292	223	187	572	701	603	638	593	619	553	1192	1584	1644	1059	1379	1454	1858	7.14083	6.99584	6.83468
ENSG00000116704	680	657	643	618	712	652	663	658	721	788	766	720	434	365	497	404	476	506	1124	1185	1306	1034	1288	798	841	1099	1127	803	953	1180	706	797	855	937	992	990	1051	885	859	849	1084	1239	911	1014	1112	1219	3.54645	3.86469	3.39997
ENSG00000225623	0	0	0	0	0	0	0	0	0	0	0	0	0	0	0	0	0	0	0	0	0	0	0	0	0	1	0	0	0	0	0	2	0	0	0	0	0	0	0	0	0	0	0	0	0	0	0	0	0
ENSG00000261213	0	0	0	0	0	0	0	0	0	0	0	0	0	0	0	0	0	0	0	0	0	0	0	0	2	0	0	0	0	0	0	0	0	0	0	0	0	0	0	0	0	0	0	0	0	0	0	0	0
ENSG00000157193	180	171	167	175	247	186	250	295	293	263	215	245	141	140	183	176	228	181	135	143	147	135	138	91	96	152	150	98	113	146	89	59	144	162	153	140	143	131	152	158	169	143	134	151	182	223	0.295596	0.316728	0.278049
ENSG00000116205	238	249	299	230	280	260	214	227	284	303	284	256	251	276	297	275	365	373	141	158	177	153	165	126	129	245	219	164	229	279	134	136	293	337	263	320	372	307	268	526	570	509	436	493	548	573	0.631748	0.745471	0.804669
ENSG00000198841	329	355	363	288	312	302	310	238	269	330	307	293	119	136	183	188	169	183	101	146	127	111	143	98	86	140	147	114	179	135	101	106	348	331	367	398	333	359	316	291	357	311	296	311	294	354	6.22148	7.57166	6.9596
ENSG00000116212	339	276	293	237	288	282	247	189	304	295	272	265	209	170	266	234	242	219	32	35	36	42	41	35	23	41	29	30	29	44	23	22	187	166	187	160	182	150	154	122	141	129	156	154	151	147	5.05974	4.64625	4.4338
ENSG00000116729	450	378	408	377	408	423	376	325	384	365	477	356	535	480	644	584	656	782	32	27	21	13	12	14	18	21	13	3	21	26	2	14	65	89	58	68	80	68	56	2	2	6	2	0	0	4	3.25958	3.0882	2.99632
ENSG00000224127	0	0	0	0	0	0	0	0	0	0	0	0	0	0	0	0	0	0	2	0	0	0	0	0	0	0	0	0	0	0	0	0	0	0	0	0	0	0	0	0	0	0	0	0	0	0	0	0	0
ENSG00000233099	0	0	0	0	0	0	0	0	0	0	0	0	0	0	0	0	0	0	20	7	9	10	10	2	13	6	1	14	16	12	7	7	4	15	8	8	5	0	5	0	0	0	0	0	0	0	0	0	0
ENSG00000233994	1	0	2	1	2	4	2	2	1	1	0	3	0	1	1	3	3	0	2	2	4	15	2	4	0	8	6	2	7	3	0	2	5	1	2	3	1	1	1	0	2	2	0	0	1	3	0.053123	0	0.107719
ENSG00000223956	15	15	8	5	15	14	2	3	6	1	2	3	18	10	17	10	16	7	0	0	0	0	0	0	0	0	0	0	0	0	0	0	0	0	0	0	0	0	0	2	2	0	2	2	0	0	0.219919	0.248043	0.118916
ENSG00000213561	0	0	0	0	0	0	0	0	0	0	0	0	0	0	0	0	0	0	0	0	0	0	0	0	0	0	4	0	0	0	0	0	0	0	0	0	0	0	0	0	0	0	0	0	0	0	0	0	0
ENSG00000234496	0	0	2	1	4	2	2	4	0	2	2	2	1	2	6	3	3	0	31	40	53	35	36	21	20	50	37	43	20	45	27	7	3	8	0	2	0	6	0	0	0	0	0	0	0	0	0	0	0.293691
ENSG00000233973	0	0	0	0	0	0	0	0	0	0	0	0	0	0	0	0	0	0	0	0	0	2	0	0	1	0	0	0	0	0	0	0	0	0	0	0	0	0	0	0	0	0	0	0	0	0	0	0	0
ENSG00000132854	4	6	13	3	5	6	2	1	0	6	5	7	10	13	14	6	8	11	0	0	0	0	0	1	0	0	0	0	0	0	0	0	0	0	0	0	0	0	0	8	0	0	5	0	1	0	0.0189602	0.0320775	0.0624751
ENSG00000227556	0	0	0	0	0	0	0	0	0	0	0	0	0	0	0	0	0	0	0	0	0	0	0	0	0	0	0	0	1	0	0	0	0	0	0	0	0	0	0	0	0	0	0	0	0	0	0	0	0
ENSG00000162616	990	861	931	858	1164	900	993	936	1055	1050	1114	1125	872	996	1223	1007	1192	1149	496	555	530	437	568	375	353	753	620	458	597	593	366	385	721	919	832	776	964	772	947	407	497	462	332	433	493	545	8.63743	8.47262	8.23529
ENSG00000162607	1536	1317	1571	1175	1612	1342	1756	1569	1716	1828	1933	1791	1157	1220	1435	1274	1459	1583	1270	1251	1418	1209	1535	981	883	1688	1667	982	1437	1569	1097	1300	2280	2679	2539	2647	2740	2711	2551	1609	2216	2170	1743	1931	2098	2363	12.8227	12.4005	13.2967
ENSG00000233602	0	0	2	2	0	0	0	0	0	0	0	0	1	0	0	0	0	0	0	0	0	0	0	0	0	1	0	0	0	0	0	0	0	0	0	0	0	0	0	0	0	0	0	0	0	0	0	0	0.105805
ENSG00000285954	0	0	0	0	0	0	0	0	0	1	2	0	0	0	0	0	0	0	2	2	0	0	0	0	3	0	0	0	0	0	0	0	0	0	0	0	0	0	0	0	0	0	0	0	0	0	0	0	0
ENSG00000233333	4	4	6	2	0	2	0	0	0	0	0	0	0	0	0	0	0	0	0	0	0	0	0	0	0	0	0	0	0	0	0	0	0	0	0	0	0	0	0	0	0	0	0	0	0	0	0.170667	0.192493	0.25955
ENSG00000154027	10	10	21	9	23	18	31	22	26	23	25	29	26	18	28	13	21	18	194	206	264	238	265	197	164	141	112	84	119	143	95	75	78	57	58	60	57	54	50	124	176	185	124	161	201	188	0.0464864	0.0524313	0.0989749
ENSG00000234108	0	0	0	0	0	0	0	0	0	0	0	0	0	0	0	0	0	0	0	0	0	0	0	2	0	0	0	0	0	0	0	0	0	0	0	0	0	0	0	0	0	0	0	0	0	0	0	0	0
ENSG00000232676	0	0	0	0	0	0	0	0	0	0	0	0	0	0	0	0	0	0	0	0	0	0	1	0	0	0	0	0	0	0	0	1	1	0	0	0	0	0	0	0	2	0	0	0	0	2	0	0	0
ENSG00000132122	16	34	18	13	29	25	22	38	20	41	31	41	25	24	47	33	49	36	31	34	33	28	28	33	13	33	32	24	22	39	22	22	9	2	3	2	2	12	0	62	64	61	42	34	65	57	0.0870294	0.208588	0.0992654
ENSG00000137960	15	6	15	4	18	10	29	20	21	15	23	36	0	0	0	0	0	0	4	1	0	3	1	3	2	100	80	54	94	104	74	64	15	19	13	6	14	31	15	6	6	6	6	6	10	5	0.124099	0.0559877	0.125819
ENSG00000227288	1	0	0	2	4	4	6	4	2	7	1	1	0	1	2	0	2	2	1	4	3	0	0	6	1	4	3	0	1	0	3	0	0	0	0	2	1	1	0	0	1	0	1	1	1	0	0.0192828	0	0
ENSG00000237852	9	5	0	14	7	17	4	17	13	6	9	5	5	3	6	9	10	20	12	8	7	5	10	4	3	8	3	2	4	5	6	4	0	0	0	0	0	0	0	9	5	7	3	4	8	9	0.687208	0.430606	0
ENSG00000116745	0	0	0	0	0	0	0	0	0	0	0	0	0	0	0	0	0	0	26	10	10	15	18	2	2	1	3	0	1	3	0	0	0	0	0	0	1	0	0	0	0	0	0	0	0	0	0	0	0
ENSG00000132855	1	1	2	0	2	0	0	0	0	0	0	0	0	1	8	9	1	2	0	0	0	0	0	0	0	3	2	0	3	3	2	0	0	0	0	0	0	0	0	0	0	0	0	0	0	2	0.00958136	0.0108067	0.0194284
ENSG00000272506	29	22	30	16	20	33	12	12	14	22	27	18	12	9	23	9	13	13	68	61	74	65	78	60	63	75	72	69	72	77	54	52	7	8	14	11	12	9	8	14	7	17	14	17	15	16	1.51564	1.29684	1.58964
ENSG00000172380	137	92	114	96	106	107	81	73	88	63	83	58	68	54	75	70	88	95	0	2	0	2	0	0	0	2	4	2	2	5	3	0	2	1	6	0	0	1	0	2	8	8	6	8	4	10	0.93848	0.710816	0.791751
ENSG00000286429	0	0	0	0	0	0	3	0	0	2	0	3	2	0	0	0	0	0	5	10	1	5	12	8	0	1	4	7	7	8	4	9	0	0	1	5	1	1	0	13	8	5	14	10	24	22	0	0	0
ENSG00000272855	0	0	0	0	0	0	6	1	4	2	5	2	0	0	0	0	0	0	0	0	0	0	0	0	0	4	0	2	4	0	6	2	0	0	0	0	0	0	0	2	5	3	5	3	0	10	0	0	0
ENSG00000270549	0	0	0	0	0	0	0	0	2	0	0	0	0	0	0	0	0	0	0	0	0	0	0	0	0	1	0	0	0	2	0	0	0	0	0	0	0	0	0	0	0	0	0	0	0	0	0	0	0
ENSG00000237163	0	0	0	0	0	0	0	0	0	0	0	0	0	0	0	0	0	0	2	0	0	0	0	0	0	0	0	0	0	0	0	0	0	0	0	0	0	0	0	0	0	0	0	0	0	0	0	0	0
ENSG00000234184	17	20	18	17	19	20	17	5	11	18	22	24	6	15	9	11	12	8	373	347	409	355	441	248	265	259	251	157	248	244	151	136	55	79	31	80	74	53	57	249	349	335	302	332	256	329	0.570768	0.757366	0.612721
ENSG00000229636	0	0	0	0	0	0	0	0	0	0	0	0	0	0	0	0	0	0	0	0	0	0	0	0	0	0	0	0	0	0	0	0	0	0	0	0	0	0	0	0	0	0	0	0	0	0	0	0	0
ENSG00000116675	83	61	77	58	65	81	62	48	58	75	66	52	92	100	110	80	114	99	12	17	19	22	19	7	16	16	6	8	17	17	17	4	73	102	115	68	107	102	78	9	21	22	23	13	25	21	0.385283	0.319372	0.362386
ENSG00000162433	2347	1861	2228	1762	2272	2265	1845	1817	1842	2021	2139	1834	1297	1296	1625	1367	1518	1671	314	269	341	310	308	210	205	627	567	415	607	604	343	368	336	351	301	317	305	325	334	67	98	85	65	82	97	105	10.0033	8.94628	9.62778
ENSG00000213625	8145	7186	8036	6823	8931	7900	7234	7057	7515	7945	8466	7729	7037	6914	8637	7461	8802	9463	7165	7006	7983	7119	7843	5178	4855	6485	5712	3918	5867	6106	3950	4185	2988	3364	3136	3119	3358	3211	2806	1963	2668	2647	2006	2323	2526	2843	50.2336	49.9868	50.2485
ENSG00000085999	10	19	19	14	16	15	18	14	18	34	45	17	9	6	9	5	9	11	7	5	13	10	23	11	12	21	17	16	25	27	12	10	13	33	17	17	16	18	32	8	27	8	3	13	13	12	0.0792025	0.169729	0.152571
ENSG00000227207	0	0	0	0	0	0	0	0	0	0	0	0	0	0	0	0	0	0	0	0	0	0	0	0	0	0	0	0	0	0	0	0	0	0	2	0	0	0	0	0	0	0	0	0	0	0	0	0	0
ENSG00000227016	0	0	0	0	0	0	0	0	0	0	0	0	0	0	0	0	0	0	23	19	25	11	22	12	13	18	13	5	8	21	6	5	0	0	0	0	0	0	0	0	2	0	0	0	0	0	0	0	0
ENSG00000236200	254	218	253	230	219	206	316	281	298	365	368	312	112	106	121	117	133	148	418	400	393	419	444	330	252	452	435	319	460	428	289	340	228	253	258	224	262	175	258	447	609	517	467	471	550	692	1.94543	1.88323	1.96464
ENSG00000237928	0	0	0	0	0	0	0	0	2	2	0	0	0	0	0	0	0	0	1	0	4	0	0	0	0	2	0	0	5	3	3	4	0	0	0	0	0	0	0	2	5	4	3	4	4	4	0	0	0
ENSG00000158966	2	0	4	4	5	9	5	4	0	4	6	16	6	5	8	6	6	18	122	142	152	117	165	80	89	115	121	70	113	103	56	55	69	71	54	71	50	55	97	130	139	163	129	150	123	211	0.00919931	0	0.0186537
ENSG00000284882	232	201	235	199	259	205	152	171	169	167	151	146	198	173	220	218	277	283	54	46	66	54	60	38	34	57	38	38	41	48	37	39	87	78	63	81	119	57	45	74	121	106	70	93	73	91	6.33416	6.18959	6.50502
ENSG00000213703	0	0	0	0	0	0	0	0	0	0	0	0	0	0	0	0	0	0	0	0	0	0	0	0	0	0	0	0	0	0	0	0	0	0	0	0	0	0	0	0	0	0	0	0	0	0	0	0	0
ENSG00000203965	194	174	173	133	216	259	211	174	216	197	258	211	148	159	185	147	207	226	167	173	197	106	158	129	128	304	266	128	250	232	153	168	219	210	249	244	255	270	272	289	423	446	307	405	395	453	1.09852	1.11127	0.99319
ENSG00000223479	0	0	0	0	0	0	0	0	0	0	0	0	0	0	0	0	0	0	0	2	0	0	0	0	0	0	0	0	0	0	0	0	0	0	0	0	0	0	0	0	0	0	0	0	0	0	0	0	0
ENSG00000233674	0	2	0	0	2	2	2	0	1	0	3	0	0	0	0	0	0	0	1	0	0	0	0	4	0	4	2	0	2	4	2	0	0	0	0	0	0	0	0	0	0	0	0	0	0	0	0	0.268851	0
ENSG00000153898	617	552	651	445	616	556	532	576	564	641	696	603	280	269	354	348	340	370	602	613	624	586	688	391	368	780	734	494	671	757	478	473	290	350	303	275	327	343	291	199	226	264	204	203	206	238	5.78976	5.84224	6.19349
ENSG00000233290	1	0	0	0	1	0	0	0	0	0	0	0	0	0	0	0	0	0	0	0	0	2	0	0	0	0	0	0	0	0	0	0	0	0	0	0	0	0	0	2	4	6	2	5	7	4	0.00447786	0	0
ENSG00000117069	0	0	0	0	0	0	0	0	0	0	2	0	0	1	4	0	2	0	0	4	2	4	8	4	8	0	0	0	0	2	0	0	0	0	4	4	5	0	0	4	3	4	2	4	2	7	0	0	0
ENSG00000187048	0	0	0	0	0	0	0	0	0	0	0	0	0	0	0	0	0	0	0	0	0	2	0	0	0	0	1	0	0	0	0	0	0	0	0	0	0	0	0	0	0	0	0	0	0	0	0	0	0
ENSG00000286918	0	0	0	0	0	0	0	1	0	0	0	2	0	0	0	0	0	0	0	0	0	0	0	0	0	0	1	0	0	4	1	0	0	0	0	0	0	0	0	1	0	0	0	0	0	0	0	0	0
ENSG00000228734	0	0	0	0	0	0	0	0	0	0	0	0	0	0	0	0	0	0	0	0	0	0	0	0	0	0	0	0	0	0	0	0	0	0	0	0	0	0	0	0	0	0	1	0	0	0	0	0	0
ENSG00000125703	1355	1210	1509	1294	1550	1298	1169	1114	1228	1341	1394	1293	1500	1386	1682	1586	1621	1908	141	153	151	171	157	148	119	178	173	87	166	153	154	151	1145	1232	1226	1219	1371	1241	1280	1229	1717	1679	1330	1473	1816	2042	14.0452	14.1462	15.8583
ENSG00000228056	0	0	0	0	0	0	0	0	0	0	0	0	0	0	0	0	0	0	0	0	0	0	0	0	0	0	0	0	0	0	0	0	0	0	0	0	0	0	0	4	1	3	0	4	2	2	0	0	0
ENSG00000285041	0	0	0	0	0	0	0	0	0	0	0	0	0	0	0	0	0	0	0	0	0	0	2	0	0	0	0	0	0	0	0	0	0	0	0	0	0	0	0	0	0	0	0	0	0	0	0	0	0
ENSG00000185839	60	59	55	55	52	45	44	60	44	82	48	59	63	51	59	83	63	56	22	21	8	23	7	14	16	19	17	8	12	15	18	27	25	49	42	42	36	23	40	19	16	18	15	8	30	39	2.80859	3.11497	2.61023
ENSG00000285808	0	0	0	0	0	0	0	0	0	0	0	0	0	0	0	0	0	0	0	0	0	1	0	0	0	0	0	0	0	0	0	0	0	0	0	0	0	0	0	0	0	0	0	0	0	0	0	0	0
ENSG00000275678	0	0	0	0	0	4	0	0	0	0	0	0	0	0	0	0	0	0	0	0	0	0	0	0	0	2	0	0	0	0	0	0	0	0	0	0	0	0	0	0	0	0	0	0	0	0	0	0	0
ENSG00000234144	0	0	0	0	0	0	0	2	0	0	0	0	0	0	0	0	0	0	0	0	0	0	0	0	0	1	6	0	0	2	1	0	0	0	0	0	0	0	0	4	2	2	2	4	2	2	0	0	0
ENSG00000226891	171	107	144	124	143	128	185	153	142	168	186	183	81	82	115	108	95	128	165	154	129	131	147	119	82	265	172	128	204	214	130	110	30	46	57	38	48	33	34	154	147	167	109	120	127	125	0.702415	0.495731	0.599708
ENSG00000213540	5	0	2	0	2	2	0	0	0	0	2	0	0	0	0	0	0	0	0	0	0	0	0	0	0	2	0	2	0	4	0	0	0	0	0	0	0	0	0	0	0	0	2	0	0	3	0.327574	0	0.132846
ENSG00000227466	0	0	0	0	0	0	0	0	0	0	0	0	0	0	0	1	0	0	0	0	0	0	0	0	0	0	0	0	0	0	0	0	0	0	0	0	0	0	0	0	0	0	0	0	0	0	0	0	0
ENSG00000154007	0	0	0	0	0	0	0	0	0	0	0	0	0	0	0	0	0	0	2	0	0	0	0	0	0	0	0	0	0	0	0	0	0	0	0	0	0	0	0	0	0	0	0	0	0	0	0	0	0
ENSG00000230498	10	8	3	3	18	23	14	16	24	21	7	19	26	23	60	22	19	31	32	9	20	14	36	17	21	10	4	5	4	5	10	6	85	72	123	76	115	105	92	110	197	179	153	177	205	206	0.154836	0.13971	0.0470948
ENSG00000229554	1	5	0	1	0	0	2	2	0	2	0	0	0	0	0	0	0	0	0	0	0	0	0	0	0	0	0	0	0	0	0	0	12	19	5	19	10	14	4	0	0	0	0	0	0	0	0.0720955	0.406577	0
ENSG00000285851	85	58	76	74	85	60	175	202	191	186	195	184	68	101	83	102	97	101	322	380	436	348	376	261	248	626	583	332	568	573	359	371	94	111	106	154	116	137	103	397	518	529	393	441	452	554	1.02211	0.786634	0.926559
ENSG00000285782	0	0	0	0	0	0	2	0	3	5	2	0	0	0	0	0	0	0	1	5	3	7	4	1	2	9	1	1	4	7	2	4	0	1	0	2	1	3	2	5	0	4	8	9	4	2	0	0	0
ENSG00000162618	0	0	0	0	0	0	0	0	0	0	0	0	0	0	0	0	0	0	0	0	0	0	0	0	0	0	0	0	0	0	0	0	0	0	0	0	0	0	0	0	0	0	0	0	0	0	0	0	0
ENSG00000131233	0	1	10	4	1	2	0	0	0	0	1	0	0	3	3	7	2	0	0	0	0	0	0	0	0	0	0	0	0	0	0	0	1	0	0	2	0	2	2	2	2	2	0	0	2	3	0	0.0149362	0.134262
ENSG00000272371	0	0	0	0	0	0	2	1	2	2	7	2	0	0	1	0	0	0	0	0	0	0	0	0	0	1	0	0	2	0	0	2	0	0	0	0	0	0	0	0	0	0	0	0	0	0	0	0	0
ENSG00000287647	0	2	4	2	2	3	3	7	11	8	7	6	2	2	0	0	0	0	8	0	3	2	6	2	3	2	2	0	0	0	2	0	0	4	17	0	2	2	7	16	10	13	12	19	4	22	0	0.0353854	0.0636164
ENSG00000230863	5	0	1	2	2	1	1	2	4	1	1	2	2	0	0	0	0	0	0	0	0	0	0	0	0	0	1	2	0	0	0	0	0	0	0	0	0	0	0	1	2	7	2	0	3	0	0.0748003	0	0.0151675
ENSG00000234383	6	7	12	3	5	20	11	13	13	7	12	20	9	9	12	2	12	9	0	2	0	1	2	0	1	5	4	0	4	3	1	0	4	0	0	1	4	3	2	4	4	8	6	5	5	3	0.145709	0.191733	0.295458
ENSG00000271576	0	2	2	0	0	0	0	0	0	2	2	0	0	3	2	4	2	2	0	0	7	3	6	0	2	4	8	6	6	2	4	1	10	14	9	19	8	7	12	48	65	55	58	49	51	56	0	0.0455082	0.0409076
ENSG00000213560	0	1	0	1	1	0	0	0	0	1	2	0	0	0	0	0	0	1	0	0	1	0	0	0	0	1	0	0	0	0	0	0	2	0	0	0	0	0	3	0	0	0	0	0	0	0	0	0.0655203	0
ENSG00000153936	218	179	169	131	163	181	230	200	189	220	265	226	176	207	192	184	233	275	79	88	88	74	81	60	37	146	115	66	118	98	60	76	202	256	220	227	270	220	247	121	153	163	121	179	185	202	0.948173	0.87811	0.745242
ENSG00000267734	23	13	27	25	28	14	36	31	30	51	31	29	26	16	32	23	23	19	22	26	18	22	43	14	10	17	18	8	13	10	10	11	36	56	58	72	63	42	49	45	41	54	23	35	66	35	0.995807	0.634827	1.1852
ENSG00000287224	0	0	0	0	1	0	0	0	0	0	0	0	0	2	0	0	0	0	3	0	3	0	2	0	0	0	0	0	0	0	0	0	0	0	0	0	0	0	0	1	0	0	0	4	1	0	0	0	0
ENSG00000227883	0	0	0	0	0	0	0	0	0	0	0	0	1	0	2	1	0	0	0	0	0	0	0	0	0	0	0	0	0	0	0	0	0	0	0	0	0	0	0	0	0	0	0	0	0	0	0	0	0
ENSG00000174021	465	423	477	341	525	441	382	385	356	435	436	367	619	572	792	745	743	847	116	107	151	112	142	104	95	157	146	102	157	165	109	125	298	309	334	351	320	283	294	168	223	240	217	255	228	257	13.3147	13.661	13.8476
ENSG00000084072	4671	3984	4402	3546	4764	4305	3818	3725	3850	4229	4336	4136	4175	3910	5282	4302	5181	5236	3434	3272	3788	3310	3772	2340	2317	2895	2655	1967	2734	2862	1776	2107	5272	5726	5517	5808	6296	4807	4810	4867	6452	6249	5383	5781	5880	6683	13.5623	13.047	12.9585
ENSG00000225087	0	0	0	0	0	0	0	0	0	0	0	0	0	0	0	0	0	0	0	0	0	1	0	0	0	0	0	0	0	0	0	0	0	0	0	0	0	0	0	0	0	0	0	0	0	0	0	0	0
ENSG00000224986	0	0	0	0	0	1	0	0	0	0	2	0	0	0	0	0	0	0	2	0	1	0	0	0	0	0	0	0	0	0	3	0	0	0	0	0	0	0	0	4	0	6	0	2	4	3	0	0	0
ENSG00000285374	4	0	4	2	2	0	0	7	2	0	0	2	0	0	0	0	0	0	0	0	0	0	0	0	0	0	0	0	0	0	0	0	0	0	0	0	0	0	0	0	0	0	0	0	0	0	0.121882	0	0.123572
ENSG00000180488	634	593	686	567	686	638	666	548	648	635	658	612	283	265	324	262	315	367	897	897	1106	838	1075	620	676	908	937	567	927	925	617	580	469	553	510	445	564	530	467	705	1082	976	579	895	999	1066	2.02186	2.13296	2.21802
ENSG00000280378	261	228	211	163	299	262	221	215	270	320	286	265	287	209	294	301	294	359	855	783	907	828	943	574	593	600	596	432	597	573	316	378	426	471	494	462	633	396	368	682	986	901	670	723	783	892	4.80341	4.7327	3.93705
ENSG00000286863	0	0	0	0	0	0	0	0	0	0	0	0	0	0	0	0	0	0	8	0	5	4	6	2	3	0	0	0	0	1	0	0	0	0	0	0	0	0	0	0	0	1	2	0	0	0	0	0	0
ENSG00000016490	0	0	0	0	0	0	0	0	0	0	0	0	0	0	0	0	0	0	0	0	0	0	0	0	0	1	2	1	2	0	0	2	0	0	0	0	0	0	0	0	0	0	0	0	0	0	0	0	0
ENSG00000233595	0	0	0	0	0	0	0	0	0	0	0	0	0	0	0	0	0	0	0	0	1	0	0	0	0	0	0	0	0	0	0	0	0	0	0	0	0	0	0	0	0	0	0	0	0	0	0	0	0
ENSG00000188786	633	603	599	636	635	625	719	678	707	697	777	704	361	345	458	393	416	461	1323	1445	1557	1450	1578	945	850	1731	1582	1123	1680	1611	1011	971	472	567	490	487	535	476	425	481	656	707	581	635	559	712	2.55916	2.74964	2.45527
ENSG00000117151	485	473	531	423	608	559	758	682	671	754	782	703	497	414	635	506	583	584	300	324	295	277	299	239	188	529	524	307	478	503	311	332	192	221	211	218	244	210	163	371	534	496	353	473	517	574	2.25914	2.48501	2.5077
ENSG00000162434	4081	3445	4113	3350	4380	3906	4126	4018	4109	4233	4548	4237	3241	3305	3807	3382	3886	4252	6986	7448	8022	6977	7972	5116	4987	9471	8749	6151	8678	9273	5841	5851	6303	6922	6958	7295	7532	6520	6381	8709	12111	11125	9222	10721	11584	12806	10.4446	9.94445	10.6725
ENSG00000137941	3	4	22	4	10	6	5	7	2	0	1	3	1	2	6	10	7	2	1	4	9	4	3	12	6	6	6	2	7	7	8	6	20	39	24	23	38	20	15	6	10	8	0	4	6	3	0.0091871	0.013816	0.0683061
ENSG00000273338	27	28	27	20	22	19	23	14	23	26	25	32	49	33	40	39	61	53	593	572	656	582	684	393	371	979	867	600	896	923	533	522	139	123	131	117	120	87	110	27	30	25	37	30	30	53	4.17257	4.88048	4.23042
ENSG00000116717	578	597	549	496	600	552	415	436	467	477	520	478	877	796	1056	907	993	999	1048	1019	1143	1027	1169	715	707	969	864	671	885	978	664	663	518	597	570	549	567	493	510	210	327	344	228	242	294	330	9.69802	11.2978	9.33915
ENSG00000223720	0	0	0	0	0	0	0	0	0	0	0	0	0	0	0	0	0	0	0	0	0	0	0	0	0	2	0	0	0	2	0	0	0	0	0	0	0	0	0	0	0	0	0	0	0	0	0	0	0
ENSG00000286548	20	19	30	32	40	63	13	32	17	22	17	21	26	46	43	48	37	64	8	11	23	8	12	10	8	19	5	7	13	20	12	4	16	9	22	19	13	7	19	4	12	8	3	3	5	3	0.103439	0.110834	0.157309
ENSG00000137968	0	0	0	0	0	0	0	0	0	0	0	0	0	0	0	0	0	0	0	0	1	0	0	0	0	0	0	0	0	0	0	0	0	0	0	0	0	0	0	0	0	0	0	0	0	0	0	0	0
ENSG00000066135	59	73	49	45	72	69	52	80	65	65	98	61	48	32	39	26	49	39	70	47	44	59	51	40	46	80	72	40	58	74	26	52	42	45	74	51	76	49	50	51	57	65	45	46	56	68	0.367598	0.51299	0.309526
ENSG00000233061	0	0	0	0	2	0	0	0	0	0	0	0	0	0	0	0	0	0	0	0	0	0	0	0	0	2	2	0	0	2	0	0	0	0	0	0	0	0	0	3	2	4	1	6	2	18	0	0	0
ENSG00000272094	2	0	1	3	4	2	0	2	3	6	6	6	0	0	0	0	0	0	9	8	12	3	5	4	3	19	9	4	4	6	4	4	5	5	0	2	8	0	5	0	0	0	0	0	0	0	0.0734898	0	0.0372543
ENSG00000228853	0	0	0	0	0	0	0	0	0	0	0	0	0	0	0	0	0	0	0	0	0	0	1	0	0	0	0	0	0	0	0	2	0	0	0	0	0	0	0	0	0	0	0	0	0	0	0	0	0
ENSG00000215874	0	0	0	0	0	0	0	0	0	0	0	0	0	0	0	0	0	0	0	0	0	0	0	0	0	0	0	0	0	0	0	0	2	5	9	4	6	4	2	0	0	0	0	0	0	0	0	0	0
ENSG00000232453	43	28	60	39	29	35	45	41	55	49	63	42	39	45	82	48	59	62	2	2	2	3	3	2	0	8	16	8	9	19	6	7	12	19	23	12	12	12	14	4	3	13	5	8	4	2	0.671589	0.49324	0.950093
ENSG00000260386	0	0	0	0	0	0	0	0	0	0	0	0	0	2	0	0	0	0	0	1	0	2	0	0	0	3	10	7	1	7	6	2	0	0	0	0	0	0	0	0	0	0	0	0	0	0	0	0	0
ENSG00000117174	392	339	444	361	429	401	391	417	457	454	428	424	461	416	515	515	588	566	953	899	973	845	1018	597	617	959	897	610	812	940	479	501	494	534	455	499	536	488	505	694	974	920	820	897	827	966	2.04113	1.9909	2.34394
ENSG00000237413	0	0	0	0	0	0	0	0	0	0	1	0	0	0	0	0	0	0	0	0	0	0	0	0	0	0	0	0	0	0	0	0	0	0	0	0	0	0	0	0	0	0	0	0	0	0	0	0	0
ENSG00000184313	0	0	0	2	0	0	1	1	3	0	0	1	1	0	8	4	0	2	0	0	0	0	0	2	0	1	2	0	3	0	0	0	0	0	0	0	0	0	0	0	0	4	0	4	2	2	0	0	0
ENSG00000225605	0	0	0	0	0	0	0	0	0	0	0	0	0	0	1	0	4	0	0	0	0	0	0	0	0	0	0	0	0	0	0	0	0	0	0	0	0	0	0	0	0	0	0	0	0	0	0	0	0
ENSG00000226476	0	1	0	6	0	0	0	0	0	0	0	0	0	2	0	2	2	0	5	8	9	9	6	3	3	5	13	13	10	13	2	22	0	0	0	0	0	0	0	0	0	0	0	0	0	0	0	0.00235088	0
ENSG00000234807	24	23	30	22	24	36	33	37	24	20	41	32	8	12	14	13	20	19	25	9	35	27	15	11	8	12	19	0	13	14	7	15	38	96	64	40	37	54	34	47	36	49	45	61	53	74	0.154509	0.167007	0.195814
ENSG00000225446	0	0	4	0	0	0	0	0	0	5	3	2	3	5	1	0	1	2	29	30	34	22	14	13	23	17	12	8	7	7	10	4	0	0	0	0	0	0	0	0	0	0	0	2	1	0	0	0	0.0711109
ENSG00000288543	2	0	0	0	0	0	2	2	1	0	0	7	2	2	0	0	3	0	0	0	0	0	0	0	0	0	0	0	0	0	0	0	5	3	4	7	2	2	3	3	4	3	2	6	8	12	0.129975	0	0
ENSG00000234683	0	0	0	0	0	0	0	0	0	0	0	0	0	0	0	0	0	0	0	0	0	0	0	0	0	0	0	0	0	0	0	0	0	0	0	0	0	0	0	0	0	0	2	0	0	0	0	0	0
ENSG00000122420	0	0	0	0	0	0	0	0	0	0	0	0	0	0	0	0	0	2	0	4	0	0	8	0	0	2	0	0	0	0	1	0	0	0	0	0	0	0	0	0	0	0	0	0	0	0	0	0	0
ENSG00000284240	0	0	0	0	0	0	2	2	0	0	2	0	0	0	0	0	0	0	0	2	0	2	3	2	0	0	0	0	0	1	0	0	0	0	0	0	0	0	0	0	0	0	0	0	0	0	0	0	0
ENSG00000267561	0	0	0	0	0	0	0	0	0	0	0	0	0	0	0	0	0	0	0	0	0	0	0	0	0	0	0	0	0	0	0	0	0	0	0	0	0	0	0	0	0	0	0	0	0	0	0	0	0
ENSG00000236290	0	0	0	0	0	0	0	6	2	2	4	2	0	0	0	0	0	0	18	17	25	11	16	11	3	4	4	6	5	0	0	2	0	0	0	0	0	0	0	7	13	2	6	8	7	3	0	0	0
ENSG00000143013	353	329	384	329	435	342	375	431	358	426	512	420	484	499	552	544	511	632	347	423	410	435	474	218	240	439	336	243	396	354	228	275	397	463	433	467	567	360	406	241	359	317	258	246	292	302	2.1032	2.21089	2.31962
ENSG00000226084	164	121	113	81	103	136	112	113	135	148	129	107	126	157	156	122	155	184	134	159	161	164	199	73	84	190	209	158	173	173	88	141	137	202	193	171	226	114	105	227	239	246	224	212	240	226	9.54414	7.94224	6.66732
ENSG00000134748	1451	1180	1437	1070	1371	1300	1206	988	1142	1299	1337	1317	909	901	1363	1184	1220	1444	1285	1348	1466	1222	1489	1029	813	1322	1201	893	1187	1276	810	850	1940	1978	1893	1943	1975	1828	1654	2152	2873	2793	2304	2480	2630	3159	8.34351	7.65294	8.37757
ENSG00000097096	49	49	37	31	81	66	70	47	51	34	32	65	36	42	51	36	79	56	41	59	57	52	69	30	24	40	24	33	45	52	23	20	107	78	113	135	98	114	109	72	81	70	94	73	85	85	0.247094	0.278694	0.189168
ENSG00000142892	3837	3348	3475	3279	3973	3511	2854	2651	2941	3191	3289	3145	4625	4701	5794	4997	5472	6039	1361	1535	1531	1524	1615	966	1029	1697	1600	1029	1494	1664	1019	1182	2026	2328	2092	2095	2321	2006	2051	2847	3929	3780	3003	3448	3790	4219	22.4756	22.1192	20.6373
ENSG00000242598	0	0	0	0	0	0	0	0	0	0	0	0	0	0	0	0	0	0	0	0	0	0	1	0	0	0	0	0	0	0	0	0	0	0	0	0	0	0	0	0	0	0	0	0	0	0	0	0	0
ENSG00000219102	0	2	0	0	1	0	2	2	2	0	2	1	0	0	0	0	0	0	4	4	1	1	5	2	1	2	2	4	3	2	2	0	0	0	0	0	0	0	2	1	2	0	1	2	1	4	0	0.0685405	0
ENSG00000184005	43	28	46	45	56	46	54	66	71	80	68	65	54	71	66	70	68	69	130	120	131	142	128	94	65	155	149	91	151	162	64	82	47	36	51	70	41	30	46	206	304	266	231	244	228	342	0.192574	0.141434	0.208866
ENSG00000230953	2	0	2	0	0	0	3	4	4	2	0	3	0	1	0	0	3	6	4	2	1	2	0	0	0	4	2	0	1	1	2	0	0	0	7	0	2	5	0	5	4	3	1	5	8	8	0.369129	0	0.374246
ENSG00000287743	10	10	2	0	19	14	2	6	6	2	2	2	0	0	0	0	0	0	0	0	0	5	1	3	0	0	0	6	2	2	0	2	6	13	6	5	17	4	9	5	3	9	10	10	4	10	0.193174	0.217879	0.0391705
ENSG00000229332	0	0	0	0	0	0	0	0	0	0	0	0	0	0	0	0	0	0	1	2	0	0	4	6	3	0	0	0	0	0	0	0	0	0	0	0	0	0	0	0	0	0	0	0	0	0	0	0	0
ENSG00000229752	0	0	0	0	0	0	0	0	0	0	0	0	0	0	0	0	0	0	0	0	0	0	0	0	0	0	0	0	0	0	0	0	0	0	0	0	0	0	0	0	0	0	0	0	0	0	0	0	0
ENSG00000237505	3	6	6	0	0	3	2	1	6	6	5	2	6	10	5	4	11	8	6	3	9	5	0	8	6	0	2	0	1	2	2	0	0	6	0	0	5	5	0	2	12	0	0	4	1	0	0.00582485	0.0131395	0.0118112
ENSG00000285462	0	0	0	0	0	0	0	0	0	0	0	0	0	0	0	0	0	0	0	0	0	1	0	0	0	0	0	0	0	0	0	0	0	0	0	0	0	0	0	0	0	1	0	0	0	0	0	0	0
ENSG00000233216	0	0	0	0	0	0	0	0	0	0	0	0	0	0	0	0	0	0	8	4	2	1	3	0	0	0	0	0	1	0	0	0	0	0	0	0	0	0	0	0	0	0	0	0	0	0	0	0	0
ENSG00000285325	0	0	0	0	0	0	0	0	0	0	0	0	0	0	0	0	0	0	0	0	0	0	0	0	0	0	0	0	0	0	0	0	0	0	0	0	0	0	0	0	0	0	0	0	0	0	0	0	0
ENSG00000058804	554	571	556	456	687	660	660	471	551	649	695	561	350	351	410	375	437	439	384	376	443	342	375	237	246	410	381	332	381	426	325	276	667	746	696	801	790	762	739	622	885	821	647	745	784	870	3.791	4.40702	3.85743
ENSG00000230728	0	0	0	1	0	0	2	1	1	2	0	0	3	1	2	0	1	1	0	0	0	0	0	0	0	0	0	0	0	0	0	0	0	0	0	0	0	0	0	0	0	0	0	0	0	0	0	0	0
ENSG00000162402	1348	1227	1446	1133	1386	1399	1612	1572	1712	1815	1857	1787	1247	1181	1401	1292	1332	1672	3033	3191	3440	2951	3499	2211	2118	2901	2862	1785	2630	2795	1830	1746	2970	3193	3067	3097	3489	2931	2923	2942	4176	3989	3363	3868	3968	4447	3.62129	3.71777	3.93841
ENSG00000232846	66	32	32	34	59	28	34	41	43	52	52	49	21	17	20	25	20	18	213	192	170	164	172	116	95	183	159	112	124	173	97	79	33	46	39	71	53	45	40	73	52	80	46	70	61	56	2.42516	1.32621	1.19214
ENSG00000219201	68	57	41	46	59	74	62	44	32	51	37	39	53	47	63	56	70	66	74	53	70	29	55	32	34	61	57	38	58	26	40	27	60	83	69	61	88	77	80	50	58	64	71	75	70	59	2.38471	2.25458	1.45777
ENSG00000287661	0	0	0	0	0	0	0	0	0	0	0	0	0	0	0	0	0	0	2	0	0	0	0	0	0	0	0	0	0	0	0	0	0	0	0	0	0	0	0	0	0	0	0	0	0	0	0	0	0
ENSG00000230787	0	0	0	0	1	1	0	0	0	0	0	0	0	0	0	0	0	0	0	0	0	1	0	0	0	1	0	0	2	0	0	0	0	0	0	0	0	0	0	0	0	0	0	0	1	0	0	0	0
ENSG00000116641	331	326	310	210	322	313	338	273	333	320	369	317	381	421	424	381	393	442	292	276	308	294	403	224	213	213	267	199	216	214	202	152	221	239	223	230	262	216	246	259	380	325	213	274	304	372	0.429526	0.477137	0.407852
ENSG00000235927	7	3	0	3	6	11	0	10	4	5	10	5	2	2	3	1	0	4	32	35	23	20	23	20	12	27	30	5	16	22	19	19	3	1	2	0	3	3	4	8	9	17	6	8	6	9	0.0986437	0.0476823	0
ENSG00000223920	0	0	0	0	0	0	1	0	0	2	0	1	0	0	0	0	0	0	0	0	0	0	0	0	0	2	1	0	3	0	0	7	0	2	0	0	0	0	0	0	0	0	0	0	0	0	0	0	0
ENSG00000237453	0	0	0	0	0	0	0	0	0	0	0	0	0	0	0	0	0	0	2	0	3	0	0	0	0	2	3	2	0	0	0	0	0	2	0	0	0	0	0	0	0	0	0	0	0	0	0	0	0
ENSG00000281207	8	14	3	2	9	2	15	6	6	10	6	2	11	10	6	2	6	4	16	23	12	7	14	13	4	62	8	8	15	12	10	10	14	19	21	10	10	9	14	29	66	33	29	34	18	34	0.0538313	0.106252	0.0204666
ENSG00000172260	0	0	1	3	0	0	0	0	0	0	2	0	0	0	0	0	0	0	22	19	10	10	12	11	19	19	17	19	21	26	12	8	0	0	0	0	0	0	0	7	9	13	10	8	14	12	0	0	0.0024793
ENSG00000285473	0	0	0	0	0	0	0	0	0	0	0	0	0	0	0	0	0	0	1	0	0	0	0	0	0	0	0	0	0	0	0	0	0	0	0	0	0	0	0	0	0	0	0	0	0	0	0	0	0
ENSG00000237959	2	2	0	0	3	2	0	0	0	0	0	0	0	0	0	0	0	0	0	0	0	0	0	0	0	0	0	0	0	0	0	0	0	0	0	0	0	0	0	0	0	0	0	0	0	0	0.200613	0.226269	0
ENSG00000231364	0	0	0	0	0	0	2	0	2	2	1	1	0	0	0	0	0	0	19	25	40	43	46	14	17	48	63	27	46	39	36	21	10	19	8	9	2	10	10	12	24	11	16	18	22	26	0	0	0
ENSG00000234578	1	0	2	0	0	1	0	0	0	0	0	0	0	0	0	0	0	0	0	0	0	0	0	0	0	0	0	0	0	0	0	0	0	0	0	0	0	0	0	0	0	0	0	0	0	0	0.0687208	0	0.139347
ENSG00000185104	427	348	365	288	353	381	360	359	349	443	369	317	379	388	453	375	457	481	875	821	820	886	1086	626	589	722	639	507	634	695	379	401	690	766	750	766	799	693	652	712	1024	920	640	870	863	1043	1.82694	1.67935	1.58332
ENSG00000117480	74	90	75	47	80	82	81	58	57	86	75	62	94	85	122	78	86	99	22	22	14	22	22	8	8	46	47	32	27	41	9	16	53	31	52	61	56	28	25	10	7	7	8	18	7	17	0.877426	1.20361	0.901612
ENSG00000227960	0	0	0	0	0	0	0	0	0	0	0	0	0	0	0	0	0	0	2	0	2	0	1	0	0	0	0	0	0	0	0	0	0	0	0	0	0	0	0	0	0	0	0	0	0	0	0	0	0
ENSG00000137944	1389	1255	1389	1175	1381	1355	1178	1222	1123	1232	1329	1172	1473	1269	1733	1480	1563	1686	723	631	721	638	759	449	437	968	948	571	925	995	588	719	1511	1562	1298	1455	1508	1388	1357	1074	1415	1386	1107	1371	1512	1638	20.4294	20.8191	20.7126
ENSG00000229505	0	0	0	0	0	0	0	0	0	0	0	0	0	0	0	0	0	0	0	0	0	0	0	0	0	1	0	0	0	0	0	0	0	0	0	0	0	0	0	0	0	0	0	0	0	0	0	0	0
ENSG00000228187	0	0	4	2	3	3	0	0	0	0	0	0	0	0	0	0	0	0	0	2	0	0	0	0	0	5	0	2	4	2	2	2	0	0	0	0	0	0	0	0	2	0	0	0	0	2	0	0	0.229398
ENSG00000182183	102	74	84	73	97	62	69	40	99	74	88	77	54	53	79	64	78	88	271	275	334	286	408	212	196	251	255	128	258	200	184	157	176	225	222	207	258	182	170	405	531	594	491	440	464	486	1.22745	1.00438	1.02485
ENSG00000232284	1	0	0	1	0	2	2	0	0	0	2	3	0	0	0	0	0	0	0	0	2	4	1	2	0	0	0	0	0	0	0	0	0	0	0	0	0	0	0	0	0	0	0	0	0	0	0.00932143	0	0
ENSG00000236915	6	8	4	6	6	6	0	0	4	0	1	2	0	0	0	0	0	0	9	12	5	10	17	6	4	2	3	2	0	6	0	6	1	0	2	3	1	4	1	2	5	7	4	0	4	10	0.0707789	0.106441	0.0478401
ENSG00000227062	8	4	0	3	1	0	0	0	0	0	0	0	0	0	0	0	0	0	0	0	0	0	0	0	0	0	0	0	0	0	0	0	0	0	0	0	0	0	0	0	0	0	0	0	0	0	0.618158	0.348606	0
ENSG00000067334	7088	6420	7080	5668	7292	6978	6013	5825	6258	6839	6897	6612	7771	7734	9779	8231	9281	10379	6936	6966	7369	6446	7448	5103	5030	6597	5914	3981	5466	5952	4092	4604	6992	7572	7234	7713	8244	7171	7195	6031	8003	7534	6167	7114	8136	8781	30.4514	31.1088	30.8387
ENSG00000284734	261	226	291	221	295	255	183	225	222	224	237	225	357	285	376	319	400	393	110	117	144	128	120	96	79	128	148	117	112	129	113	107	249	242	223	228	252	228	202	308	458	386	360	380	387	415	5.26216	5.13921	5.94834
ENSG00000215875	0	0	0	0	0	0	0	0	0	0	0	2	0	0	0	0	0	0	0	0	0	0	0	0	0	0	0	0	0	0	0	0	0	0	0	0	0	0	0	0	0	0	0	0	0	0	0	0	0
ENSG00000235673	0	0	0	0	0	0	4	1	0	0	1	0	0	0	0	0	0	0	2	2	0	1	5	0	2	0	0	2	0	2	0	0	0	0	0	0	0	0	0	0	0	0	0	0	0	0	0	0	0
ENSG00000225938	59	36	44	39	51	55	69	50	54	69	72	56	10	4	7	17	12	21	85	112	119	111	131	55	64	129	96	74	121	106	57	83	158	211	169	208	191	145	133	109	224	217	133	192	216	177	4.7286	3.25423	3.57531
ENSG00000226938	0	0	0	0	0	0	0	0	0	0	0	0	0	0	0	0	0	0	0	0	0	0	0	0	0	0	0	0	0	0	0	0	0	0	0	0	0	0	0	0	0	0	0	0	0	0	0	0	0
ENSG00000287587	1	7	3	2	3	1	1	2	1	2	2	0	0	0	0	0	0	0	0	0	0	0	0	0	0	0	0	0	0	0	0	0	0	0	0	0	0	0	0	2	6	3	0	2	2	4	0.0271875	0.214651	0.0826933
ENSG00000122417	773	614	727	556	779	667	822	787	852	939	859	850	528	626	775	565	657	683	1098	1139	1284	1162	1337	850	763	1327	1355	859	1224	1127	817	813	2068	2210	2046	2010	2303	2039	2023	1334	1863	1791	1280	1542	1630	1943	2.29097	2.05245	2.18451
ENSG00000142949	36	29	42	22	34	19	20	16	21	25	20	12	5	10	7	6	7	1	2	4	4	1	12	2	6	6	8	4	16	8	6	18	14	15	12	12	28	21	12	2	0	3	3	5	0	0	0.108547	0.098623	0.128394
ENSG00000116133	272	283	272	229	325	295	204	172	218	200	248	205	216	171	318	213	299	297	17	12	16	8	12	10	6	16	31	6	18	26	15	22	199	210	250	198	221	205	146	50	41	51	46	32	28	32	1.41379	1.65907	1.43339
ENSG00000235105	86	113	167	76	106	124	96	59	110	95	158	97	93	82	95	132	97	131	33	58	45	44	40	19	19	41	32	37	51	109	64	46	48	75	71	69	84	67	47	51	106	80	67	79	105	70	2.20978	3.27487	4.35058
ENSG00000285210	4	2	4	4	7	5	2	2	0	6	2	0	0	0	0	0	0	0	0	0	0	0	0	0	0	4	0	4	0	2	1	2	2	6	4	2	3	9	3	2	0	1	0	0	0	0	0.0447817	0.0252543	0.0454025
ENSG00000232882	0	0	0	0	0	0	0	0	0	0	0	0	0	0	0	0	0	0	8	2	0	2	2	4	2	2	2	0	5	0	0	1	0	0	0	0	0	0	0	6	10	2	2	3	0	2	0	0	0
ENSG00000171502	4	2	1	12	4	4	12	14	8	10	9	15	10	6	13	7	2	8	39	51	50	41	38	27	18	38	53	40	67	52	36	26	27	48	49	48	54	59	40	17	12	7	3	4	0	12	0.0135028	0.00761482	0.00342251
ENSG00000162399	0	0	0	0	0	0	0	0	0	0	0	0	0	0	0	0	0	0	2	0	0	2	4	0	2	0	0	2	0	0	2	0	0	0	0	0	0	0	0	0	0	0	0	0	0	0	0	0	0
ENSG00000116157	172	129	201	143	212	175	146	139	154	187	181	130	115	101	132	121	137	135	290	302	249	273	275	234	161	310	308	220	299	345	187	235	338	411	395	403	421	317	367	525	629	674	553	629	646	705	3.28333	2.77741	3.8901
ENSG00000143036	22	8	12	14	20	21	0	9	3	6	0	7	0	1	0	0	2	0	0	0	2	2	2	1	0	2	2	0	0	1	1	0	7	8	10	2	5	6	6	2	2	0	14	5	3	3	0.247673	0.10158	0.136967
ENSG00000232672	0	0	0	0	0	0	0	0	0	0	0	0	0	0	0	0	0	0	0	0	0	0	0	0	0	0	0	0	0	0	0	0	0	0	0	0	0	0	0	0	0	0	0	0	0	0	0	0	0
ENSG00000230817	6	5	7	3	10	2	0	0	1	0	0	0	0	0	0	0	1	0	5	12	19	6	10	5	6	8	12	7	9	15	4	3	0	0	0	0	0	0	0	23	36	14	8	19	27	25	0.089927	0.0845227	0.106369
ENSG00000235613	38	22	53	35	60	45	34	41	34	33	38	40	13	16	21	6	13	24	94	91	78	83	124	58	51	103	72	64	85	84	52	64	32	41	57	26	37	32	33	47	48	70	64	73	58	57	0.724958	0.473387	1.02514
ENSG00000065243	769	621	795	636	818	727	787	700	755	761	857	805	464	533	670	589	629	727	1419	1549	1626	1531	1570	1096	1027	1480	1267	861	1337	1458	915	1039	551	624	580	562	638	665	581	841	1052	1024	853	967	994	1025	3.60124	3.28006	3.77461
ENSG00000226759	0	0	0	0	0	0	0	0	0	0	0	0	0	0	0	0	0	0	2	4	4	9	4	0	0	0	0	0	0	1	0	0	2	0	4	0	1	0	2	0	0	0	0	0	0	0	0	0	0
ENSG00000226960	2	0	2	0	2	3	0	0	0	0	3	5	0	0	0	0	0	0	0	0	0	0	0	0	0	0	0	0	0	0	0	0	8	6	10	3	7	6	2	13	21	34	21	34	38	28	0.109673	0	0.111194
ENSG00000233877	14	6	9	4	14	6	10	9	1	22	8	14	0	1	4	1	0	0	83	79	85	58	92	65	49	82	79	76	118	114	82	51	33	44	38	19	23	29	32	25	44	35	31	38	28	43	1.16843	0.564795	0.761548
ENSG00000284637	0	0	0	0	0	0	0	0	0	1	0	2	0	0	0	0	0	2	0	0	0	0	0	0	0	0	0	0	0	1	0	0	0	1	7	7	3	1	2	0	0	0	0	0	0	0	0	0	0
ENSG00000234080	0	0	1	0	0	0	0	1	0	0	0	0	1	1	0	0	0	1	5	4	2	0	2	5	0	1	2	2	2	1	2	0	0	0	0	2	0	1	0	0	0	0	0	0	0	0	0	0	0.0373393
ENSG00000237899	2	0	2	0	2	2	7	4	4	7	7	3	3	3	1	3	2	4	2	2	9	3	14	3	6	5	4	0	1	6	0	2	0	2	5	2	1	11	1	7	9	9	0	7	11	2	0.13715	0	0.139051
ENSG00000238081	0	0	0	0	0	0	0	0	0	0	0	0	0	0	0	0	0	0	0	0	0	0	0	0	0	0	0	0	0	0	0	0	0	4	3	0	8	4	2	0	0	0	2	0	0	0	0	0	0
ENSG00000234784	0	0	0	0	0	0	3	0	0	2	0	0	0	0	0	0	0	0	0	0	2	1	3	0	0	1	1	0	0	0	1	1	0	0	0	0	0	0	0	0	0	0	0	0	0	0	0	0	0
ENSG00000225492	1560	1423	1512	1296	1608	1420	1320	1293	1252	1490	1509	1508	2048	2075	2610	2121	2344	2707	286	268	305	280	351	211	234	843	832	608	785	870	537	487	767	723	741	822	872	695	672	97	138	164	143	193	147	147	21.4227	22.0403	21.0514
ENSG00000223905	4	0	6	0	8	12	0	3	0	0	0	4	0	0	0	0	0	0	6	5	5	3	6	2	4	9	10	9	9	7	8	7	0	0	0	0	0	0	0	17	23	21	18	22	15	31	0.194571	0	0.295903
ENSG00000227290	8	11	4	10	3	10	3	2	3	2	4	8	4	0	11	5	10	17	9	2	12	18	5	4	10	2	1	4	7	3	0	2	10	21	10	10	10	10	8	3	9	9	4	6	12	6	0.280859	0.435568	0.142376
ENSG00000117500	5064	4585	4952	4306	5091	4826	4694	4363	4600	4862	5290	4935	5482	5383	6826	5988	6724	7014	2918	2971	3026	2710	3286	2002	1823	3173	2665	1940	2882	2881	1886	1734	3165	3626	3278	3125	3805	3386	3116	2535	3531	3297	2540	3063	3009	3786	17.7571	18.1336	17.6051
ENSG00000285409	0	0	0	0	0	0	0	0	0	0	0	0	0	0	0	0	0	0	0	1	0	0	0	0	0	0	0	0	0	0	0	0	0	0	0	0	0	0	0	0	0	0	0	0	0	0	0	0	0
ENSG00000016602	0	0	0	0	0	0	0	0	0	0	0	0	0	0	0	0	0	0	0	0	0	0	0	0	0	0	0	0	0	4	0	0	0	0	0	0	0	0	0	0	0	0	0	0	0	0	0	0	0
ENSG00000171790	2	0	2	0	0	0	2	2	14	4	3	4	0	0	0	0	0	0	2	6	5	10	11	5	3	9	10	3	2	1	2	3	0	4	0	6	2	2	2	6	10	19	14	9	21	10	0.0149878	0	0.0151956
ENSG00000231090	1	4	0	2	2	2	1	2	5	0	0	2	1	0	0	0	0	0	7	0	3	11	0	5	1	7	3	5	3	6	4	0	1	0	1	4	4	7	1	5	0	5	11	6	3	7	0.0125774	0.0567435	0
ENSG00000117528	575	451	559	457	534	505	539	481	522	561	603	603	572	553	747	571	664	691	518	492	551	418	570	328	403	590	562	366	499	555	344	315	509	749	571	611	653	580	580	567	755	699	613	687	664	754	2.4261	2.14626	2.39129
ENSG00000271723	0	0	0	0	0	0	0	0	0	0	0	0	0	0	0	2	0	0	0	0	0	0	0	0	0	0	0	0	0	0	0	0	0	0	0	0	0	0	0	0	0	0	0	0	0	0	0	0	0
ENSG00000066185	104	132	151	99	158	110	114	72	111	119	100	99	174	173	247	199	238	260	47	69	88	79	77	55	74	68	108	37	94	96	44	50	0	0	0	1	1	0	0	46	89	82	41	60	66	63	1.54015	2.2048	2.26718
ENSG00000172339	1038	862	1021	907	1148	1075	989	776	908	1000	1044	1014	1640	1494	1865	1741	1839	2165	547	501	620	515	610	466	374	661	564	337	508	521	406	337	687	797	687	700	688	587	652	696	909	942	745	796	830	880	3.47745	3.25714	3.46792
ENSG00000036549	2036	1876	2052	1684	2276	1936	1863	1821	1924	2039	2098	2034	1431	1479	1733	1679	1656	1843	1864	1955	2104	1837	2101	1307	1282	2521	2473	1714	2207	2504	1616	1728	2849	3187	2814	3008	3253	3127	2624	3024	4368	4069	3219	3573	3806	4473	7.30021	7.58674	7.45958
ENSG00000287724	0	0	0	0	0	0	0	0	0	0	0	0	0	0	0	0	0	0	0	0	0	0	0	0	0	6	3	1	3	3	2	1	0	0	2	0	4	1	4	0	1	0	0	0	0	0	0	0	0
ENSG00000229567	4	1	2	1	0	2	1	0	4	2	0	4	2	0	3	0	0	0	3	3	4	3	13	10	2	8	4	0	2	1	2	0	6	3	6	3	9	5	3	9	8	1	5	6	6	1	0.764468	0.215558	0.387533
ENSG00000058799	1832	1431	1669	1383	1809	1719	1226	1186	1372	1485	1487	1401	1551	1497	1897	1797	1692	1974	331	321	343	335	339	225	223	517	450	284	457	461	321	409	1036	1074	1029	1165	1035	949	965	887	1130	1021	864	1069	1058	1217	29.0625	25.6043	26.8438
ENSG00000233235	3	4	5	4	5	3	2	0	0	0	0	0	8	8	8	2	1	5	10	1	1	0	1	0	0	1	0	0	0	0	0	0	0	4	2	3	14	6	9	6	15	4	4	7	6	19	0.121576	0.182832	0.205436
ENSG00000287870	0	0	0	0	0	2	0	0	0	0	0	0	0	0	0	0	0	0	0	0	0	0	0	0	0	0	0	0	0	0	0	0	0	0	0	0	0	0	0	0	0	1	0	0	0	0	0	0	0
ENSG00000284846	0	0	0	0	0	0	0	0	0	0	0	0	0	1	0	0	0	0	0	0	0	0	0	0	0	0	1	1	1	2	0	3	0	0	0	0	0	0	0	0	2	0	0	0	0	0	0	0	0
ENSG00000272145	34	34	31	26	23	36	26	32	27	35	35	47	8	9	22	22	20	14	35	27	37	18	47	22	21	40	37	12	28	23	17	17	2	19	10	18	14	18	19	41	62	39	33	73	58	49	0.650953	0.7342	0.601745
ENSG00000235251	4	6	2	1	6	4	6	0	0	0	4	4	4	6	8	2	5	3	1	0	0	0	0	0	0	7	4	6	11	0	0	4	0	0	0	2	0	0	0	4	14	12	2	6	17	2	0.137882	0.233272	0.0698966
ENSG00000203985	0	0	0	0	0	0	4	2	0	0	0	2	0	0	0	0	0	0	0	5	1	4	5	0	0	2	2	0	2	0	1	2	0	0	0	1	0	0	0	1	0	0	0	0	0	0	0	0	0
ENSG00000228838	2	0	2	3	1	0	0	1	0	1	4	1	0	0	0	0	0	0	0	2	0	6	0	0	0	0	0	0	0	3	1	0	2	0	2	0	0	1	0	3	1	2	3	0	2	3	0.0957001	0	0.0970268
ENSG00000283761	11	18	13	10	16	18	14	11	10	12	12	12	7	5	5	4	4	3	55	50	45	58	67	37	36	59	71	32	50	88	31	40	25	19	15	10	17	25	10	7	24	19	17	6	26	18	0.0616282	0.113743	0.073843
ENSG00000284716	3	4	3	1	1	0	5	6	2	6	6	4	4	0	4	1	3	3	4	5	1	0	2	4	0	8	2	1	3	4	4	0	12	10	23	18	18	13	15	9	18	13	12	21	17	10	0.0929015	0.13971	0.0941895
ENSG00000189433	0	0	0	0	0	0	0	0	0	0	0	0	0	0	0	0	0	0	0	0	0	0	2	0	0	1	0	0	6	0	2	4	0	0	0	0	0	0	0	0	0	0	0	0	0	0	0	0	0
ENSG00000231866	0	0	0	0	0	0	2	2	2	6	4	5	0	0	0	0	0	0	0	0	0	0	0	0	0	0	0	0	0	0	0	0	0	0	0	0	0	0	0	0	0	0	0	0	0	0	0	0	0
ENSG00000179178	0	0	0	0	0	0	0	0	0	0	0	0	0	0	0	2	3	1	0	0	0	0	0	0	0	0	0	0	0	0	0	0	8	3	4	3	4	6	1	0	0	0	0	0	0	0	0	0	0
ENSG00000229687	5	5	1	2	2	0	0	0	0	0	0	0	0	0	0	0	0	0	0	0	0	0	0	0	0	0	0	0	0	0	0	0	0	0	0	0	0	0	0	0	0	0	0	0	0	0	0.564664	0.636876	0.114498
ENSG00000142700	0	0	0	0	0	0	0	0	0	0	0	0	0	0	0	0	0	0	0	0	0	0	0	2	0	0	0	0	0	0	0	0	0	0	0	0	0	0	0	0	0	0	0	0	0	0	0	0	0
ENSG00000233514	0	1	1	2	5	1	5	2	0	1	3	2	2	10	0	5	6	2	1	0	0	0	1	0	0	1	0	0	5	3	0	1	1	5	3	1	4	4	5	0	9	3	0	2	2	1	0	0.101192	0.0909626
ENSG00000127124	159	139	141	112	162	143	106	96	127	152	112	119	59	70	103	76	97	97	380	328	489	358	387	245	259	716	789	486	775	808	448	487	250	272	225	316	312	236	223	202	204	238	179	182	244	291	0.351146	0.346234	0.31571
ENSG00000235055	0	0	0	0	0	0	0	0	0	0	0	0	0	0	0	0	0	0	0	0	0	0	0	0	0	0	0	0	0	0	0	0	0	0	0	0	0	0	0	0	0	0	0	2	0	0	0	0	0
ENSG00000266993	13	5	7	7	10	11	0	2	11	5	5	9	8	17	26	14	14	14	10	21	18	18	6	7	0	18	12	9	8	18	11	9	14	6	9	11	20	12	5	18	30	28	18	20	20	29	0.230832	0.100136	0.126018
ENSG00000153923	0	0	0	0	0	0	0	6	0	2	11	0	0	0	1	0	0	1	0	2	0	2	2	1	0	0	0	0	0	0	0	0	0	4	2	0	3	0	0	4	6	3	2	3	0	0	0	0	0
ENSG00000097033	7570	6699	7490	6241	8112	7833	6609	6312	6675	7453	7673	7157	6442	6567	8389	7269	8621	8751	2289	2352	2474	2212	2623	1607	1439	3247	3176	1943	3061	3006	2064	2353	4179	4902	4500	4787	5082	4398	4179	2289	3211	3158	2457	2849	2975	3459	35.5329	35.4658	35.6448
ENSG00000223675	0	0	0	0	0	0	0	0	0	0	0	0	0	0	0	0	0	0	0	0	0	0	0	0	0	2	0	0	1	0	2	0	0	0	0	0	0	0	0	0	0	0	0	0	0	0	0	0	0
ENSG00000182330	0	0	0	0	0	0	0	0	0	0	0	0	0	0	0	0	0	0	0	0	0	0	0	0	0	0	0	0	0	0	0	4	0	0	0	0	0	0	0	0	0	0	0	0	0	0	0	0	0
ENSG00000162604	5350	4689	5318	4215	5391	5060	4419	4130	4789	5116	5075	4723	5769	5801	7368	6056	6837	7883	2408	2453	2735	2336	2741	1936	1689	2980	2490	1798	2548	2698	1877	1846	3670	4009	3826	3886	4143	3662	3597	3501	4539	4445	3182	4196	4469	4913	31.3268	30.9675	31.5711
ENSG00000229316	0	0	0	0	0	0	0	0	0	0	0	1	0	0	0	0	0	0	0	0	0	0	0	0	0	0	0	0	0	0	0	0	0	0	0	0	0	0	0	0	1	6	0	2	0	1	0	0	0
ENSG00000116171	8557	7567	8136	6807	9088	8019	7175	7032	7062	7956	8087	7569	9887	9376	11849	10543	11462	12679	4575	4672	5040	4488	5034	3530	3333	5031	4360	3106	4345	4524	3038	3458	4961	5878	5551	5549	5917	5600	5384	4798	6465	6002	4600	5690	6329	6606	33.4885	33.4012	32.2823
ENSG00000134709	58	29	58	44	61	60	44	56	90	97	84	66	82	71	105	78	91	120	269	322	335	251	294	185	204	206	156	117	180	163	81	158	260	273	276	316	273	306	265	376	575	532	351	454	492	544	0.283237	0.159729	0.287164
ENSG00000225767	6	14	18	5	9	5	12	9	10	3	16	11	5	5	11	15	10	17	62	49	57	43	72	18	42	39	34	24	33	40	15	12	49	32	22	36	30	27	35	19	36	29	25	19	24	37	0.385274	1.01394	1.17184
ENSG00000234099	23	7	7	8	21	19	16	20	19	12	42	19	0	2	1	0	0	1	10	12	14	22	40	8	13	19	26	12	15	24	17	18	4	7	5	1	4	3	1	56	62	59	34	22	31	41	0.702147	0.241026	0.21666
ENSG00000137936	128	110	135	115	154	116	157	196	196	200	157	224	212	194	252	258	348	265	172	168	257	155	221	138	105	193	161	107	178	182	77	88	40	64	61	38	53	46	67	90	103	117	71	74	142	89	0.59752	0.579162	0.638934
ENSG00000235308	0	0	0	0	0	0	0	0	0	0	0	0	0	0	0	0	0	0	0	4	6	0	2	0	3	1	0	0	0	0	0	0	0	0	0	0	2	0	0	1	4	2	2	5	2	10	0	0	0
ENSG00000232752	0	0	0	0	0	0	0	2	0	0	0	2	0	0	0	0	0	0	0	0	0	0	0	0	0	0	0	0	0	0	0	0	0	0	0	0	0	0	0	0	0	5	0	8	2	2	0	0	0
ENSG00000228971	0	0	0	0	0	0	0	0	0	0	0	0	0	0	0	0	0	0	0	0	0	0	3	0	0	0	0	0	0	0	0	0	0	0	0	0	0	0	0	0	0	0	0	0	0	0	0	0	0
ENSG00000226745	0	0	0	0	0	0	0	0	0	0	0	0	0	0	0	0	0	0	0	0	0	0	0	0	0	0	0	0	0	0	0	0	2	0	0	0	0	0	0	0	0	0	0	0	0	0	0	0	0
ENSG00000178028	1165	1004	1195	913	1187	1138	943	907	1042	954	1168	1055	509	476	630	613	621	642	452	468	513	477	522	297	261	649	621	434	732	736	416	447	958	1172	932	1076	1039	941	817	1058	1359	1274	1128	1306	1243	1294	6.7205	6.53242	6.98913
ENSG00000280040	0	0	0	0	0	0	2	0	4	0	4	2	1	0	0	0	1	0	0	0	0	0	0	0	0	0	0	0	0	0	0	0	0	0	0	0	0	0	0	0	0	0	0	0	0	0	0	0	0
ENSG00000168710	2424	2235	2269	1906	2812	2649	2070	2020	2145	2153	2358	2438	2582	2508	3133	2797	3142	3460	476	460	550	446	555	352	372	532	464	353	479	451	311	302	1272	1296	1283	1293	1413	1126	1165	990	1368	1204	1086	1149	1112	1365	15.5496	16.1707	14.7571
ENSG00000117519	594	530	608	527	569	567	486	481	443	545	518	546	241	282	419	321	360	438	471	516	588	535	681	353	354	532	492	321	515	478	286	373	1187	1428	1272	1351	1412	1297	1129	1453	2126	1976	1582	1635	1807	1797	6.89381	6.93767	7.15412
ENSG00000238037	0	0	0	0	0	0	0	0	0	0	0	0	0	0	0	0	0	0	0	0	0	0	0	0	0	0	0	0	0	0	0	0	0	0	0	0	0	0	0	0	0	0	0	0	0	0	0	0	0
ENSG00000215869	0	0	0	0	0	0	3	0	0	1	0	2	0	0	0	0	0	0	0	0	0	0	0	0	0	0	0	1	0	0	0	2	0	0	0	0	0	0	0	7	19	12	2	4	17	9	0	0	0
ENSG00000134215	193	202	201	202	234	230	121	110	146	133	155	160	260	277	309	254	243	342	1047	1008	1223	1027	1198	669	741	775	736	454	753	728	479	457	406	436	412	418	372	374	332	153	170	184	159	171	178	253	0.853225	1.00722	0.900911
ENSG00000229887	0	0	0	0	0	0	0	0	0	0	0	0	0	0	0	0	0	0	4	1	0	1	1	2	0	0	0	0	0	2	2	3	0	0	0	0	0	0	0	0	0	0	0	0	0	0	0	0	0
ENSG00000228502	15	3	12	7	7	9	16	7	11	12	4	9	8	10	16	18	13	11	0	1	7	5	8	6	1	5	3	6	5	7	6	4	4	14	8	7	2	5	1	13	6	12	3	4	2	11	0.348799	0.078681	0.282908
ENSG00000236268	0	0	0	0	0	0	0	0	0	0	0	0	0	0	0	0	0	0	5	2	4	6	5	3	0	0	0	0	0	0	0	2	3	2	2	2	0	0	0	5	14	2	2	8	0	6	0	0	0
ENSG00000225568	1	0	0	1	1	0	2	0	1	1	0	0	0	0	0	0	0	0	0	2	4	1	3	0	1	2	1	0	5	0	3	3	4	2	0	1	2	8	0	1	2	3	1	2	2	3	0.0391026	0	0
ENSG00000232015	0	0	0	0	0	0	0	0	0	0	0	0	0	0	0	0	0	0	2	4	1	5	6	0	2	4	6	0	0	0	0	0	0	0	0	0	0	0	0	0	0	0	0	0	1	0	0	0	0
ENSG00000188641	2500	2242	2643	2070	2766	2416	2451	2395	2561	2741	2771	2714	1834	1757	2194	1942	2064	2339	2598	2702	2910	2576	2934	1989	1749	7462	7308	4768	6743	7024	4557	4652	1543	1745	1515	1799	1811	1510	1538	1810	2601	2503	1893	2357	2323	2801	11.3234	11.4534	12.137
ENSG00000152078	10	9	10	8	10	12	12	18	14	13	2	13	28	21	33	36	54	30	0	0	2	0	2	0	0	27	10	10	13	18	8	6	22	20	18	31	37	34	20	0	2	0	2	2	0	0	0.0437356	0.0443959	0.044342
ENSG00000237352	125	135	125	103	166	130	115	110	110	140	107	124	139	130	149	133	166	172	4	20	20	7	10	7	10	13	17	22	8	16	7	12	86	142	105	93	122	115	117	54	101	76	85	62	101	93	0.477115	0.581181	0.483729
ENSG00000215887	0	0	0	0	0	0	0	0	0	0	0	0	0	0	0	0	0	0	1	0	0	2	2	1	0	2	1	0	0	0	0	0	0	0	0	0	0	0	0	0	0	0	0	0	0	0	0	0	0
ENSG00000237954	0	0	0	0	0	0	0	0	0	0	0	0	0	0	0	0	0	0	0	0	0	0	0	0	0	0	0	0	0	0	0	0	0	0	0	0	0	0	0	0	0	0	0	2	1	2	0	0	0
ENSG00000185668	12	2	0	2	8	16	15	16	17	14	19	10	10	16	8	6	9	10	2	3	6	2	8	2	6	12	6	4	2	10	3	3	6	13	12	11	12	6	14	22	21	23	20	10	6	14	0.13072	0.0245729	0
ENSG00000171492	616	660	717	620	742	773	610	559	637	752	656	621	467	502	669	568	595	688	556	703	758	552	639	428	410	1009	860	617	891	831	564	580	2388	2373	2268	2599	2700	2272	2093	932	1200	1220	900	1232	1181	1302	4.10059	4.95535	4.83909
ENSG00000233129	0	0	0	0	0	0	0	2	0	0	2	0	0	0	0	0	0	0	2	2	0	1	1	6	0	0	0	0	0	0	0	0	0	0	0	0	0	0	0	0	2	0	0	0	2	0	0	0	0
ENSG00000230798	0	2	2	2	1	0	0	2	0	0	0	2	0	3	0	0	0	0	0	0	0	0	0	0	0	0	0	0	0	0	0	0	0	2	0	0	1	0	0	0	0	0	0	0	0	0	0	0.0603134	0.0542161
ENSG00000170989	3528	3312	3681	3065	4003	3710	3497	3133	3210	3755	3751	3408	2094	2012	2436	2192	2528	2703	8429	8564	9551	8698	9717	5581	5235	8433	7755	5239	7852	8019	5078	5929	14470	16318	15354	16106	16865	13357	12936	9663	13328	12539	10135	11358	10986	12110	21.817	23.1005	23.0787
ENSG00000186086	0	0	0	1	0	0	0	0	0	0	0	0	0	0	0	0	0	0	0	0	0	0	0	0	0	2	0	4	0	0	0	0	0	0	0	0	0	0	0	0	0	0	0	0	0	0	0	0	0
ENSG00000055732	971	874	979	822	1098	1021	796	866	784	895	870	912	588	603	737	698	614	800	37	33	42	23	55	35	23	96	67	41	62	89	38	41	111	169	115	121	147	91	122	88	130	107	60	97	71	112	4.73462	4.80664	4.83981
ENSG00000258634	64	43	45	61	66	68	51	54	59	69	65	44	32	31	41	45	34	46	25	23	46	43	43	23	29	65	54	47	70	45	25	49	57	51	74	77	81	59	51	82	90	81	50	74	80	59	0.490304	0.371551	0.349524
ENSG00000237897	0	0	2	0	0	0	0	0	0	0	0	0	0	0	1	0	0	0	0	0	0	0	0	0	0	2	0	0	0	0	0	0	0	0	0	0	0	0	0	0	0	0	0	0	0	0	0	0	0.110444
ENSG00000116299	88	85	72	75	83	74	41	31	35	39	56	54	16	30	37	40	32	32	71	57	69	60	61	49	20	173	169	126	170	178	107	91	52	40	40	59	43	34	23	71	88	57	64	96	52	95	0.309146	0.336795	0.256445
ENSG00000137962	0	0	0	0	0	2	0	0	0	0	0	0	2	0	0	0	0	0	6	4	0	2	0	2	4	0	2	0	2	4	0	0	0	0	0	0	0	0	0	0	0	0	0	0	0	0	0	0	0
ENSG00000198691	3	0	4	0	0	3	2	0	4	1	0	0	9	2	3	3	8	11	0	0	0	0	0	0	0	0	0	0	0	0	0	0	0	0	0	0	0	0	0	4	0	5	14	5	3	7	0.0113369	0	0.0153254
ENSG00000286692	0	0	0	0	0	0	6	0	0	0	0	2	2	0	2	2	0	0	0	0	0	0	0	0	0	0	2	1	0	0	0	0	0	0	0	0	0	0	0	0	0	0	0	0	0	0	0	0	0
ENSG00000260464	10	6	15	3	17	13	1	0	0	2	4	4	0	0	6	2	1	2	10	10	10	3	9	2	7	7	1	4	9	4	1	12	3	9	7	4	3	3	3	8	17	9	8	8	6	15	0.182892	0.123769	0.278142
ENSG00000237435	0	0	0	0	0	0	0	0	0	0	0	0	0	0	0	0	0	0	0	0	0	0	0	0	0	0	1	0	0	0	0	1	0	0	0	0	0	0	0	0	0	0	0	0	0	0	0	0	0
ENSG00000232825	0	0	0	0	0	0	0	0	0	0	0	0	0	0	0	0	0	0	0	0	0	0	1	0	0	0	0	0	0	0	0	0	0	0	0	0	0	0	0	0	0	0	0	0	0	0	0	0	0
ENSG00000273204	4	3	0	0	3	1	3	0	0	2	1	2	2	1	3	0	0	1	0	0	1	1	2	2	1	2	0	0	2	1	1	1	0	1	0	2	0	1	0	2	1	0	0	1	2	2	0.301154	0.25475	0
ENSG00000079739	320	300	282	208	334	287	319	295	344	376	309	269	256	245	340	289	316	294	263	243	310	243	331	184	151	452	377	313	362	386	244	308	275	273	238	273	300	273	230	267	365	357	287	307	351	390	2.5351	2.6806	2.26503
ENSG00000242396	0	0	0	0	0	0	0	0	0	0	0	1	0	0	0	0	0	0	0	0	0	0	0	0	0	0	0	0	0	0	0	0	0	0	0	0	0	0	0	1	0	0	0	0	0	0	0	0	0
ENSG00000117154	0	0	0	0	0	0	0	0	0	0	0	0	0	0	0	0	0	0	4	0	0	0	6	2	0	0	1	0	0	0	0	0	0	0	0	0	0	0	1	0	0	0	0	0	0	0	0	0	0
ENSG00000162377	654	569	591	481	607	550	513	457	555	549	584	519	536	501	631	588	655	670	150	134	128	128	147	95	69	106	125	101	118	146	121	78	456	544	486	495	556	476	477	260	350	384	310	283	363	386	5.09243	4.99717	4.66567
ENSG00000224613	0	0	0	0	0	0	0	0	0	0	0	0	2	4	9	1	3	20	0	0	0	0	4	0	0	0	0	0	2	3	0	1	0	0	0	0	0	0	0	0	0	3	2	1	0	0	0	0	0
ENSG00000176378	0	0	0	0	0	0	0	0	0	0	0	0	0	0	0	0	0	0	0	0	0	0	0	0	0	0	0	0	0	0	0	0	0	0	0	0	0	0	0	0	2	0	0	0	0	2	0	0	0
ENSG00000116670	1081	893	999	803	1123	910	821	746	896	909	925	937	235	224	313	305	336	365	133	135	160	140	145	94	97	279	308	197	313	238	166	196	715	781	662	769	791	649	607	420	588	629	431	563	492	553	10.5039	9.78681	9.8417
ENSG00000215871	0	0	0	0	0	0	1	0	0	0	0	0	0	0	0	0	0	0	0	0	0	0	0	0	0	0	0	0	0	0	0	0	0	0	0	0	0	0	0	0	1	0	0	0	0	0	0	0	0
ENSG00000232542	13	7	7	9	5	4	6	3	8	3	15	3	10	6	5	12	4	9	19	14	29	37	20	6	16	11	17	18	9	16	9	6	4	6	19	12	9	14	12	11	12	8	12	7	9	19	1.04709	0.635923	0.571636
ENSG00000231095	0	2	0	0	0	0	0	1	0	0	0	0	0	0	0	0	0	0	0	0	0	0	0	0	0	4	4	4	8	6	2	0	0	0	0	1	1	0	2	2	0	0	10	2	1	8	0	0.0732984	0
ENSG00000116774	11	10	12	2	14	10	0	8	8	2	10	12	16	24	26	10	18	16	2	0	2	0	3	2	4	0	8	0	0	0	0	4	2	8	14	8	8	2	6	0	0	0	0	0	0	0	0.125943	0.129136	0.139298
ENSG00000224081	10	5	2	2	14	3	15	10	12	8	11	12	14	13	9	14	9	14	8	12	13	13	10	10	2	6	0	4	0	4	3	0	21	11	7	22	8	14	19	1	11	12	4	9	4	16	0.0315264	0.0177791	0.00639269
ENSG00000235299	93	84	99	69	84	65	106	83	105	135	105	108	95	85	99	108	112	92	212	227	228	207	214	126	116	265	216	135	210	223	117	130	115	137	107	100	97	88	124	126	202	186	163	205	154	196	9.41626	9.59267	10.1627
ENSG00000287756	0	0	0	0	0	0	0	0	0	0	4	0	0	0	0	0	0	0	2	0	0	0	0	0	0	0	2	2	4	0	2	4	0	0	0	0	0	0	0	0	0	0	0	0	0	0	0	0	0
ENSG00000269113	0	0	0	0	0	0	0	0	0	0	0	0	0	0	0	0	0	0	0	0	0	0	0	0	0	0	0	0	0	0	0	0	0	0	0	0	0	0	0	0	0	0	2	0	0	0	0	0	0
ENSG00000023909	2510	2410	2534	2180	2860	2517	3013	2832	2973	3187	3395	3010	3644	3709	4654	3961	4427	4806	1349	1364	1479	1200	1441	969	954	1086	960	649	1000	937	597	530	2386	2540	2344	2289	2679	2299	2234	1689	2413	2177	1666	2106	2220	2523	14.941	16.1804	15.293
ENSG00000117133	3573	3062	3627	2993	3872	3396	2895	3058	3052	3258	3316	3211	4525	4299	5223	4745	5074	5698	2867	3031	3021	2845	3116	2032	2141	3147	2848	1982	2844	2898	2149	2225	3934	4585	3999	4473	4478	3944	4132	3196	4245	3999	3348	3846	4062	4522	50.3945	48.7103	51.8654
ENSG00000069702	297	309	251	187	305	242	324	283	324	305	347	337	271	238	247	294	315	292	1237	1287	1417	1306	1455	891	918	1790	1485	1035	1535	1598	984	908	1028	1184	1043	1159	1166	1086	1045	545	750	788	585	729	728	794	1.11843	1.31242	0.958305
ENSG00000230489	0	0	0	1	4	0	0	0	2	5	0	4	1	0	0	1	2	2	78	72	81	64	72	61	60	28	25	17	24	21	24	17	2	2	0	0	1	0	2	3	7	2	2	4	1	0	0	0	0
ENSG00000230721	0	0	0	2	0	0	0	0	0	0	0	0	0	0	0	0	0	0	2	2	0	1	2	0	0	0	0	0	6	6	2	4	0	0	0	0	0	0	0	0	0	3	2	0	0	0	0	0	0
ENSG00000228399	1	1	8	1	1	6	11	6	6	6	6	4	2	2	0	0	0	0	12	11	33	21	11	13	24	23	24	10	24	13	23	19	11	23	11	15	14	11	10	16	38	16	24	17	26	43	0.0941655	0.106208	0.763768
ENSG00000236776	7	4	0	0	0	0	3	2	0	4	3	0	0	0	0	0	0	0	0	0	0	0	0	0	0	0	0	0	0	0	0	0	0	0	0	0	0	0	0	0	0	0	0	0	0	0	0.491503	0.316777	0
ENSG00000285928	2	2	0	0	0	0	0	3	2	4	0	0	0	1	0	2	1	0	0	1	1	0	0	0	0	4	7	1	2	3	1	3	2	0	0	0	0	0	0	0	0	0	0	1	2	0	0.0359875	0.0405897	0
ENSG00000287076	0	0	0	0	0	0	0	0	0	0	0	0	0	0	0	0	0	0	0	0	0	0	0	0	0	0	0	0	0	0	0	0	0	0	0	0	0	0	0	0	0	0	0	0	0	0	0	0	0
ENSG00000237480	0	0	0	0	0	0	0	0	0	2	0	0	0	0	0	0	2	0	0	2	0	0	0	0	0	3	0	0	0	0	0	0	0	0	0	0	0	0	0	0	0	0	0	0	0	0	0	0	0
ENSG00000117461	48	28	33	34	42	39	26	21	34	28	29	29	31	10	24	41	37	45	22	18	31	38	19	11	14	77	71	46	59	48	18	28	58	71	68	75	60	57	47	11	29	12	31	14	44	11	0.20959	0.137896	0.146091
ENSG00000230427	3	0	0	4	3	3	0	0	0	0	0	0	1	0	1	0	2	1	0	0	0	0	0	0	0	12	0	0	2	1	2	0	0	0	0	0	0	0	0	2	0	4	0	1	4	1	0.088409	0	0
ENSG00000237003	7	13	9	12	18	15	23	13	27	16	16	5	14	19	21	35	31	27	26	28	26	28	15	9	15	31	17	18	27	18	12	10	12	27	21	17	13	18	19	20	15	21	14	13	11	20	0.704335	1.47533	0.918128
ENSG00000286758	3	0	2	3	3	4	2	1	3	2	0	5	0	0	0	0	0	0	1	2	0	0	0	0	0	0	0	0	0	0	0	0	0	2	2	4	7	8	0	0	2	0	1	4	2	0	0.161763	0	0.109337
ENSG00000235501	6	0	2	6	2	10	0	0	1	1	4	0	3	1	4	6	6	4	2	0	1	4	2	0	0	0	4	0	2	5	4	4	4	0	0	0	0	2	0	2	7	2	12	2	10	2	0.0769935	0	0.0260203
ENSG00000233184	288	237	310	238	275	301	287	273	311	292	316	301	231	197	299	245	273	318	229	255	267	209	203	219	176	281	294	141	219	250	187	175	633	691	618	682	687	602	534	1507	2059	1913	1657	1963	1808	2259	0.942648	0.874923	1.02872
ENSG00000198198	744	616	687	542	672	696	723	712	868	805	811	921	302	295	321	280	321	372	1204	1181	1295	1269	1347	741	816	1335	1310	842	1301	1293	669	846	717	857	769	929	897	753	715	1004	1212	1185	1017	1233	1232	1316	0.911827	0.851501	0.853642
ENSG00000225183	0	0	1	1	5	2	3	7	11	11	4	2	15	4	8	4	5	9	2	6	4	4	2	0	1	0	2	4	3	1	2	1	4	3	5	1	13	4	0	3	8	5	0	4	1	5	0	0	0.137591
ENSG00000116793	1004	854	972	867	1158	1049	1273	1104	1231	1359	1415	1161	507	474	573	575	586	697	1767	1734	1803	1570	1770	1148	1174	1627	1556	1028	1484	1500	841	837	1588	1797	1750	1649	1851	1523	1555	671	892	855	787	849	860	919	4.52273	4.339	4.43928
ENSG00000286899	16	2	15	11	17	5	6	10	10	2	4	11	2	0	0	0	1	6	45	55	29	33	36	11	24	32	26	23	32	27	16	20	4	4	7	7	8	4	2	22	22	18	32	11	24	25	0.286782	0.0404321	0.272585
ENSG00000134201	0	0	0	1	0	0	0	0	0	0	0	0	0	0	0	0	0	0	0	0	0	0	2	0	2	24	9	10	25	16	7	6	2	1	0	2	9	2	5	0	0	1	0	0	0	0	0	0	0
ENSG00000238122	0	0	0	0	0	0	0	0	0	0	0	0	0	0	0	0	0	0	0	0	0	0	0	0	0	4	0	0	0	0	1	0	0	0	0	0	0	0	0	0	0	0	1	0	0	0	0	0	0
ENSG00000116455	484	538	572	398	589	464	444	369	486	502	521	491	333	320	410	356	393	382	97	90	119	114	117	83	80	207	201	143	172	179	86	111	633	730	695	739	754	618	549	569	737	725	547	735	638	699	5.8222	7.29943	6.97617
ENSG00000213366	41	42	30	32	28	32	29	29	27	41	25	35	14	14	19	21	29	36	178	212	218	182	202	125	152	264	277	173	272	334	149	168	86	63	57	60	90	63	61	239	328	240	203	249	258	292	0.145267	0.16784	0.107766
ENSG00000230864	0	0	0	0	0	0	0	0	0	0	0	0	0	0	0	0	0	0	0	0	2	0	0	0	0	0	0	0	0	0	0	0	0	0	0	0	0	0	0	0	0	0	0	0	0	0	0	0	0
ENSG00000232918	0	0	0	0	0	0	0	0	0	0	0	0	0	0	0	0	0	0	0	0	0	0	0	0	0	0	0	0	0	0	0	0	4	4	2	0	4	2	0	0	0	0	0	0	0	0	0	0	0
ENSG00000236360	0	0	0	1	1	0	0	0	0	0	0	0	0	1	0	0	0	0	0	0	0	0	0	0	1	1	0	2	0	1	0	0	0	1	0	1	0	0	0	0	0	0	0	0	0	0	0	0	0
ENSG00000183298	19	19	33	20	15	34	19	24	23	18	12	20	28	34	25	19	26	30	30	34	51	53	38	28	7	31	30	11	40	33	23	27	36	44	71	47	59	36	32	34	57	40	34	31	49	45	0.69736	0.786542	1.228
ENSG00000234332	46	31	38	41	33	34	22	8	15	42	34	33	33	35	49	39	33	30	52	45	33	26	40	18	16	69	82	55	49	50	42	43	33	57	46	56	49	39	32	53	48	36	50	60	52	90	2.20437	1.67553	1.84624
ENSG00000117525	2437	2211	2611	1942	2665	2489	2058	1975	2149	2209	2264	2229	6276	6330	7605	6720	7283	8085	21575	21699	23700	21386	23867	14821	14102	12193	10846	7426	10454	11268	6838	6354	2166	2609	2347	2251	2560	2403	2194	380	479	492	330	433	400	543	27.2738	27.9089	29.6262
ENSG00000099260	0	0	0	0	0	0	0	0	0	0	0	0	0	0	0	0	0	0	0	0	0	2	0	0	0	0	0	0	0	0	0	0	0	0	0	0	0	0	0	0	0	0	0	0	0	0	0	0	0
ENSG00000225079	33	35	23	19	33	30	37	25	28	38	19	39	22	27	20	31	30	39	27	16	39	22	25	28	10	7	14	6	6	3	0	6	101	122	141	100	114	67	87	16	45	48	29	40	47	45	2.04973	2.45197	1.44841
ENSG00000226483	0	0	0	0	0	0	0	0	0	0	0	0	0	0	0	0	0	0	0	0	0	0	0	0	0	0	0	0	0	0	0	0	0	0	0	0	0	0	0	0	0	0	0	1	0	0	0	0	0
ENSG00000224238	7	7	7	10	10	18	18	9	7	6	9	13	1	4	11	1	4	2	16	36	21	12	18	13	4	51	49	26	56	46	31	31	2	2	1	0	4	2	1	2	1	5	0	7	5	4	0.109753	0.123789	0.111275
ENSG00000282608	0	8	13	0	6	4	1	0	2	0	2	0	4	2	2	8	14	17	12	2	4	9	6	2	0	0	0	0	0	0	0	0	0	2	10	3	12	12	10	0	0	0	0	0	0	0	0	0.113842	0.166291
ENSG00000134258	0	0	0	0	0	0	0	0	0	0	0	0	0	0	0	0	0	0	2	0	0	0	0	0	0	0	0	0	0	0	0	0	0	0	0	0	0	0	0	0	0	0	0	0	0	0	0	0	0
ENSG00000268993	0	0	0	0	0	0	0	0	0	0	0	0	0	0	0	0	0	0	0	0	0	0	0	0	0	0	0	1	0	0	0	0	0	0	0	0	0	0	0	0	0	0	0	0	0	0	0	0	0
ENSG00000162692	40	16	46	18	19	19	24	24	12	18	39	41	18	40	52	30	42	35	55	34	56	65	59	24	57	86	66	68	96	84	80	46	33	26	32	44	54	30	39	0	0	2	0	0	0	0	0.213581	0.0963579	0.249023
ENSG00000203914	0	0	4	0	0	0	2	2	2	0	0	0	6	0	0	0	2	2	3	0	0	0	2	4	2	2	0	2	4	0	2	0	0	3	3	2	2	2	8	1	2	0	0	0	0	6	0	0	0.0835904
ENSG00000227070	2	4	10	5	12	4	10	3	2	4	1	5	5	5	3	5	4	4	3	4	0	1	1	3	0	17	9	7	2	4	2	2	1	0	6	4	2	0	3	8	9	10	7	10	9	9	0.135709	0.306129	0.687953
ENSG00000270457	16	14	18	5	25	13	16	16	22	32	24	27	0	0	0	0	0	0	21	16	16	16	25	22	8	7	17	8	4	9	1	6	0	0	0	0	0	0	0	2	4	6	7	4	6	0	1.52894	1.50891	1.7439
ENSG00000163349	2372	2008	2230	1892	2417	2310	2181	2045	2027	2579	2557	2198	2692	2668	3285	2766	3196	3345	5403	5613	5908	5195	6218	3683	3648	4921	4588	2809	4549	4558	2855	2687	3300	4084	3506	3300	4070	3699	3304	1867	2714	2537	1587	2153	2228	2408	8.3748	7.99629	7.9826
ENSG00000134222	13	8	11	8	33	6	15	9	26	22	6	12	4	9	6	6	9	4	10	8	16	6	6	4	8	25	27	7	18	23	14	16	6	13	11	4	6	8	6	2	9	2	6	11	14	14	0.14707	0.102079	0.126169
ENSG00000231987	0	0	0	0	0	0	0	0	0	0	0	0	0	0	2	0	0	0	0	0	0	0	0	0	0	0	0	0	0	0	0	0	0	0	0	0	0	0	0	0	0	0	0	0	0	0	0	0	0
ENSG00000228057	6	9	13	16	23	9	36	34	24	33	37	18	18	15	13	9	16	19	90	69	73	58	73	53	42	68	45	32	54	72	44	35	39	33	37	14	41	27	15	56	111	62	73	66	65	55	0.154048	0.260623	0.338398
ENSG00000224445	0	0	0	0	0	0	0	0	0	0	0	0	0	0	0	0	0	0	0	0	0	0	0	0	0	0	0	0	0	0	0	0	0	0	0	0	0	0	0	0	0	2	0	0	0	0	0	0	0
ENSG00000267272	0	0	0	0	0	0	0	3	0	0	4	0	0	0	0	0	0	0	0	0	0	0	0	0	0	0	0	0	0	0	0	0	15	12	12	21	20	2	14	2	5	2	4	5	5	0	0	0	0
ENSG00000229842	0	0	0	0	0	0	0	6	2	0	0	0	0	0	0	0	0	0	0	0	0	0	0	0	0	0	0	0	0	0	0	0	0	0	0	0	0	0	0	6	2	4	3	3	1	1	0	0	0
ENSG00000270631	0	0	0	0	0	0	0	0	0	0	0	0	0	0	0	0	0	0	0	0	0	0	0	0	2	0	0	0	0	0	0	0	0	0	0	0	0	0	0	0	0	0	0	0	0	0	0	0	0
ENSG00000237343	1	0	0	0	0	0	0	0	0	0	0	0	0	2	0	1	0	0	2	0	0	0	0	0	0	1	0	0	0	0	0	0	0	0	0	0	0	0	0	0	0	2	0	0	0	0	0.102862	0	0
ENSG00000229201	0	0	0	0	0	0	0	0	0	0	0	0	0	0	0	0	0	0	0	0	0	0	0	0	0	2	0	0	0	0	0	0	0	0	0	0	0	0	0	0	0	0	0	0	0	0	0	0	0
ENSG00000181656	0	0	0	0	0	0	0	0	0	0	0	0	0	0	0	0	0	0	1	0	8	0	1	0	2	0	0	0	1	0	0	0	0	0	0	0	2	0	0	4	1	2	0	4	2	1	0	0	0
ENSG00000122481	188	159	178	164	153	180	210	174	176	203	203	167	195	222	249	248	272	324	147	152	115	122	177	74	76	125	94	84	97	82	78	92	155	146	150	159	155	136	127	263	341	298	236	262	325	335	3.1511	3.00584	3.02485
ENSG00000198162	483	406	548	431	559	477	404	474	522	480	509	472	372	382	427	416	451	482	697	700	825	690	782	567	444	802	716	484	708	701	492	412	651	773	647	692	724	610	672	647	884	826	706	783	871	870	1.61377	1.52998	1.85633
ENSG00000238198	36	34	36	33	48	57	64	45	45	50	76	38	33	28	48	43	46	55	37	21	43	26	18	12	26	28	28	15	21	22	11	31	15	25	13	10	18	13	10	52	57	78	44	54	89	80	0.471324	0.502066	0.477858
ENSG00000233593	17	28	25	30	25	24	23	29	41	32	35	34	28	26	30	34	29	46	2	5	9	2	11	2	5	5	11	6	10	2	4	6	1	2	0	2	0	0	0	2	10	10	0	8	8	10	0.0382527	0.0710618	0.0570338
ENSG00000196369	234	228	239	154	254	236	242	253	227	210	271	294	289	319	383	317	361	338	280	369	311	230	320	258	214	626	574	524	595	654	458	389	156	201	163	191	153	156	130	155	220	199	140	154	205	243	1.04535	1.14881	1.08249
ENSG00000171517	9	10	14	18	12	22	2	12	4	10	10	6	16	31	28	22	13	15	7	8	2	12	15	4	8	6	0	1	4	1	0	2	17	23	17	12	16	14	22	6	14	16	7	12	2	10	0.0822084	0.103024	0.129653
ENSG00000228852	14	11	6	14	0	12	3	4	8	4	10	9	8	5	2	2	8	4	15	12	26	19	21	13	13	6	4	4	11	5	2	1	16	10	11	20	15	17	14	51	83	68	46	59	102	94	0.318888	0.282597	0.138561
ENSG00000234367	0	6	0	4	3	4	2	3	0	0	0	5	2	0	5	4	5	3	2	8	8	6	3	2	2	16	13	11	16	5	10	3	0	8	6	8	1	1	4	6	7	13	4	4	6	2	0	0.543721	0
ENSG00000225206	0	0	0	0	0	0	0	0	0	0	0	2	0	0	0	0	0	0	0	0	0	0	0	0	0	0	0	0	0	0	0	0	0	0	0	0	0	0	0	0	0	0	0	0	0	0	0	0	0
ENSG00000271644	0	0	2	1	0	0	0	0	0	0	0	0	0	0	0	0	0	0	0	0	0	0	0	0	0	0	2	0	0	0	0	1	0	2	0	0	0	0	0	0	0	0	0	0	0	0	0	0	0.590028
ENSG00000117543	976	907	966	725	1008	1055	664	745	723	846	793	900	1030	1047	1343	1093	1290	1376	372	326	424	358	376	188	238	258	305	175	263	343	186	189	1399	1504	1451	1490	1619	1374	1323	1438	2108	1942	1485	1690	1918	2123	10.614	11.125	10.6509
ENSG00000232878	20	12	27	10	24	11	16	17	19	15	13	28	29	12	27	24	17	23	21	48	25	35	28	16	22	36	39	20	43	25	17	15	15	18	13	12	14	16	13	15	20	16	11	16	9	31	0.436765	0.295572	0.597807
ENSG00000143079	379	298	357	288	341	317	413	340	358	469	446	419	213	211	234	222	237	260	49	52	37	46	46	23	42	60	59	55	55	52	29	37	84	76	62	84	84	85	77	82	122	112	104	92	82	80	1.66073	1.47279	1.58602
ENSG00000227963	11	16	18	16	21	13	9	18	9	6	12	5	10	10	18	5	13	8	3	15	13	11	13	7	12	21	24	21	24	34	21	10	14	21	10	23	27	16	25	20	28	28	24	22	22	36	0.136073	0.223236	0.225752
ENSG00000275064	0	0	0	1	0	0	0	0	0	0	0	0	0	0	0	0	0	0	0	0	0	0	1	0	0	0	9	2	0	0	4	0	0	0	0	0	0	0	0	0	0	0	0	0	0	0	0	0	0
ENSG00000134243	1060	882	1164	963	1206	1042	1185	1192	1121	1237	1273	1228	989	1029	1143	1160	1220	1272	64	94	85	70	74	39	51	143	148	91	147	132	91	96	258	271	223	290	282	224	205	172	245	193	140	135	184	165	3.75114	3.52039	4.17629
ENSG00000225297	1	0	0	2	1	1	0	0	1	0	10	9	1	0	1	0	0	0	0	0	0	0	0	0	0	4	3	0	6	8	5	0	0	0	0	0	0	0	0	5	0	3	7	4	5	2	0.174588	0	0
ENSG00000227034	0	0	0	0	0	0	0	0	0	0	1	0	2	0	0	0	0	1	2	0	2	0	0	2	0	0	0	0	2	0	2	0	0	0	0	0	0	0	0	0	0	0	0	0	0	2	0	0	0
ENSG00000232450	4	4	0	2	8	7	6	11	9	11	11	18	0	0	0	0	0	0	0	0	0	0	0	0	0	6	5	2	4	5	1	0	34	27	24	37	34	23	35	0	0	6	2	3	3	4	0.172721	0.194809	0
ENSG00000283752	5	18	4	8	13	18	2	2	7	17	15	18	3	7	5	15	6	5	29	24	24	27	22	15	12	8	11	12	8	20	14	5	38	63	52	43	64	65	66	25	32	40	26	36	24	39	0.235414	0.955871	0.190942
ENSG00000223575	11	12	4	4	10	9	18	5	6	8	17	7	5	15	14	9	23	44	54	76	85	89	67	39	39	73	54	29	72	56	31	50	19	30	15	38	11	15	13	23	28	12	19	7	18	13	0.37125	0.456794	0.136872
ENSG00000230768	0	0	0	0	0	0	0	0	0	0	0	0	0	0	0	0	0	0	0	0	0	0	0	0	0	0	0	0	0	0	0	0	0	0	0	0	0	0	0	0	0	0	0	0	0	0	0	0	0
ENSG00000134250	1409	1299	1347	1191	1615	1364	1381	1267	1413	1451	1558	1486	1047	894	1216	1040	1199	1376	2191	2173	2312	2063	2343	1580	1468	2358	2241	1458	2162	2418	1397	1454	1058	1075	1072	1056	1155	1027	1003	1148	1592	1514	1227	1384	1471	1667	2.28344	2.37439	2.21323
ENSG00000234790	0	0	0	0	0	0	0	0	0	0	0	0	0	0	0	0	0	0	2	0	0	0	0	0	0	0	0	0	0	0	0	0	0	0	0	0	0	0	0	0	0	0	0	0	0	0	0	0	0
ENSG00000162643	31	8	24	29	27	11	28	28	18	38	23	44	26	30	32	38	45	42	3	9	2	7	7	6	6	4	2	2	5	1	0	0	47	72	79	67	88	56	49	4	2	9	4	12	2	23	0.255229	0.0742887	0.200336
ENSG00000235527	120	129	141	114	157	158	140	114	129	155	123	165	97	75	72	96	135	127	144	153	186	186	210	135	126	116	123	98	124	126	86	81	57	65	68	64	82	48	63	268	304	286	239	229	283	300	1.25432	1.52083	1.49426
ENSG00000272715	1	0	0	0	2	0	0	0	0	0	0	0	2	0	0	0	3	4	0	0	0	0	0	0	0	0	0	0	0	0	0	0	0	0	0	0	0	0	0	0	0	0	0	0	0	0	0.084331	0	0
ENSG00000235038	0	0	0	0	0	0	0	0	0	0	0	0	0	0	0	0	0	0	0	9	3	0	2	1	0	3	2	7	6	6	3	9	1	4	4	2	1	0	0	0	0	0	4	0	2	2	0	0	0
ENSG00000143093	1047	909	1041	782	1132	993	1083	1049	1199	1174	1160	1198	274	307	360	282	320	311	1451	1395	1643	1462	1562	956	877	2198	1985	1461	1900	2036	1153	1131	1253	1312	1347	1421	1438	1126	1132	1207	1666	1673	1352	1472	1618	1614	4.60469	4.50902	4.64177
ENSG00000188761	6	5	4	4	7	2	24	25	42	48	42	46	24	32	23	22	30	53	167	211	192	173	187	132	113	76	115	78	106	114	82	46	51	54	32	43	68	28	41	45	76	43	27	33	53	58	0.0213076	0.0200271	0.014402
ENSG00000226415	188	174	213	191	196	175	186	152	207	188	177	209	75	54	81	65	80	72	39	20	25	20	23	25	11	50	37	25	36	34	31	27	147	170	168	130	166	126	105	61	66	66	70	58	69	79	8.09622	8.4516	9.30002
ENSG00000085491	1260	1043	1251	1081	1387	1209	1092	1165	1222	1336	1449	1329	1212	1180	1514	1345	1429	1567	167	186	210	207	179	142	162	242	238	188	235	252	173	170	337	456	403	406	489	443	530	342	354	369	256	278	313	374	6.05062	5.64909	6.09068
ENSG00000117598	0	0	0	0	0	1	5	2	0	0	2	1	0	0	0	0	0	0	0	0	1	0	0	0	0	0	0	0	0	0	0	0	1	5	3	0	1	0	1	0	1	3	0	3	4	0	0	0	0
ENSG00000221986	2	0	2	2	0	6	16	2	4	9	8	2	1	8	2	0	0	3	0	0	0	0	0	0	2	2	2	0	2	4	2	2	0	1	0	0	4	0	3	0	0	0	0	0	0	0	0.036724	0	0.0372331
ENSG00000173947	6	2	0	3	0	2	8	6	3	7	7	12	24	8	4	10	10	4	12	3	9	2	2	0	2	8	2	6	12	5	10	8	0	0	0	0	0	0	0	2	0	0	0	2	0	2	0.0490738	0.0184499	0
ENSG00000241361	6	2	2	0	6	0	0	4	2	0	0	0	1	5	0	0	4	0	15	7	17	8	20	19	10	83	73	44	85	105	65	67	0	0	0	0	0	0	1	6	18	19	11	22	19	33	0.102972	0.0387134	0.0347997
ENSG00000230434	0	0	0	0	0	0	0	0	0	0	0	0	0	0	0	0	0	0	0	0	2	3	0	0	0	2	0	0	0	0	0	0	0	0	0	2	0	0	0	0	0	0	0	0	0	0	0	0	0
ENSG00000226067	260	260	209	184	240	207	265	263	222	286	327	302	112	103	115	146	192	128	196	172	206	144	157	117	95	237	218	176	228	204	160	153	679	768	721	851	803	763	641	313	483	413	424	506	479	516	3.22988	3.64293	2.63232
ENSG00000230718	1	0	0	1	1	0	5	9	0	3	0	0	0	0	0	0	0	0	1	1	2	1	4	1	0	4	9	3	4	7	3	1	0	0	0	0	0	2	0	0	0	6	0	0	0	4	0.09022	0	0
ENSG00000134198	91	94	133	93	136	130	92	90	94	85	107	73	53	34	50	55	55	51	278	273	314	251	282	189	206	380	330	251	314	392	284	248	152	150	137	134	162	117	97	85	124	121	106	159	127	165	0.861174	1.00333	1.27609
ENSG00000226128	0	4	4	2	1	2	0	0	0	0	1	0	0	0	0	0	0	2	2	4	0	3	2	4	0	0	0	0	0	0	0	0	0	0	0	0	0	0	0	2	6	0	0	2	0	2	0	0.336529	0.302509
ENSG00000215784	11	22	14	8	36	17	18	6	10	8	4	4	10	0	0	6	3	6	14	22	15	16	15	12	14	40	15	22	25	28	39	23	20	26	13	17	13	9	18	8	14	16	10	2	11	21	0.146631	0.330765	0.189208
ENSG00000155363	318	369	333	331	428	394	447	491	509	524	577	560	264	237	294	212	317	320	629	583	741	570	618	418	388	843	827	500	754	789	498	494	472	655	603	593	542	457	501	544	698	694	548	674	635	758	1.57797	2.0652	1.67531
ENSG00000198799	589	539	534	496	650	610	712	677	655	681	683	691	301	222	410	293	375	395	1540	1427	1710	1382	1618	1113	946	1592	1543	940	1452	1488	928	972	626	741	685	661	696	647	670	1213	1764	1645	1309	1544	1663	1731	1.52595	1.57499	1.40264
ENSG00000279513	8	0	11	7	8	4	6	8	3	7	6	6	4	2	2	13	8	4	42	31	35	62	50	22	28	32	19	21	41	36	19	17	18	40	17	16	9	18	11	94	95	114	76	104	95	132	0.173184	0	0.241429
ENSG00000231365	126	120	111	108	127	131	96	113	116	149	143	137	90	74	147	106	96	125	174	139	132	128	152	104	94	131	120	98	113	132	74	82	120	166	119	157	137	176	116	243	294	239	239	217	259	346	0.354839	0.381159	0.31693
ENSG00000143106	7195	6431	7329	5942	7583	6923	6608	6436	6630	7196	7336	6864	7385	7322	9130	7856	8838	9935	1899	2026	2114	1924	2210	1408	1331	2174	1998	1316	1893	1988	1265	1288	7717	8939	7958	8556	9041	7269	7300	6369	8748	8438	7098	7800	8009	9056	40.5284	40.8575	41.8555
ENSG00000117620	768	728	934	678	828	832	697	724	660	792	899	745	739	669	907	755	864	994	1192	1396	1358	1277	1489	1021	871	1341	1221	908	1230	1290	796	825	686	783	791	713	796	800	709	1007	1409	1390	948	1176	1377	1582	1.36032	1.45438	1.67728
ENSG00000280186	4	6	6	2	4	8	1	0	0	0	1	0	6	4	0	0	5	8	0	0	6	6	4	4	0	6	6	4	18	7	10	8	2	19	2	12	0	10	14	2	8	2	4	2	2	0	0.0554247	0.0937691	0.0842897
ENSG00000280099	12	8	6	4	13	8	4	2	8	3	8	4	0	0	0	0	0	0	5	2	4	10	4	4	4	0	2	2	2	8	2	0	14	24	28	30	18	16	14	7	14	11	8	14	8	7	0.225734	0.169735	0.114432
ENSG00000234222	37	41	48	43	47	47	57	49	51	70	61	51	52	45	71	47	65	50	42	35	65	42	61	28	37	60	63	40	75	40	36	21	8	18	27	16	13	18	28	64	90	80	74	78	90	92	0.367935	0.459853	0.483939
ENSG00000162688	753	566	648	564	708	659	575	593	721	723	832	688	514	534	630	555	710	682	553	639	678	610	665	446	468	676	641	398	456	617	418	387	715	811	879	853	987	751	857	659	947	846	689	787	874	979	2.98161	2.52777	2.60142
ENSG00000197106	0	0	0	0	0	0	0	0	0	0	0	0	2	0	0	2	0	0	0	0	0	0	0	0	0	0	0	0	0	2	0	0	4	0	0	0	0	0	0	0	0	0	0	0	0	0	0	0	0
ENSG00000271601	585	528	508	443	508	580	531	486	560	548	617	554	382	326	382	355	411	472	734	706	882	722	824	495	454	728	682	461	592	648	411	371	879	906	953	951	975	853	820	982	1383	1370	1074	1307	1261	1481	4.73435	4.81951	4.16819
ENSG00000236137	8	7	4	2	3	7	16	14	17	12	16	8	10	3	2	5	7	5	17	13	11	28	10	14	6	4	2	4	4	9	4	1	12	18	20	16	10	24	15	11	10	8	4	13	10	22	0.13278	0.131041	0.0673105
ENSG00000203859	0	0	0	0	0	0	0	0	0	0	0	0	0	0	0	0	0	0	2	0	0	0	0	0	0	0	0	0	0	0	0	0	0	0	0	0	0	0	0	0	0	0	0	0	0	0	0	0	0
ENSG00000228086	1	0	1	0	1	1	0	1	0	2	1	2	0	2	0	1	0	1	4	3	4	5	12	3	3	14	9	3	10	7	6	4	2	6	1	1	3	2	1	4	10	8	7	7	12	10	0.0545587	0	0.0553151
ENSG00000213421	0	0	0	0	0	0	0	0	0	0	0	0	0	0	0	0	0	0	0	0	0	0	0	0	0	0	0	0	0	0	0	0	0	0	0	0	0	0	0	0	0	0	4	0	0	0	0	0	0
ENSG00000134242	1644	1505	1695	1316	1651	1581	1914	1701	1750	1810	2048	1910	1485	1391	1782	1469	1736	1814	2624	2488	2853	2634	2872	1950	1745	3725	3676	2481	3344	3405	2340	2207	3882	4206	3909	4178	4427	3899	3654	2150	2819	2729	2339	2533	2913	3164	11.8077	12.1917	12.3428
ENSG00000234020	0	1	0	0	0	0	0	0	0	0	0	0	0	0	0	0	0	0	0	0	0	0	0	0	0	0	0	0	0	0	0	0	0	0	0	0	0	0	0	0	0	0	0	0	0	0	0	0.032153	0
ENSG00000060718	0	0	0	0	0	0	0	0	0	0	0	0	0	0	0	0	0	0	0	0	0	0	0	0	0	1	0	0	0	0	0	0	0	0	0	0	0	0	0	0	0	0	0	0	0	0	0	0	0
ENSG00000236804	3	1	2	2	2	2	18	20	27	31	31	14	20	14	25	23	24	34	66	37	62	44	77	38	42	60	37	24	32	28	12	20	23	21	49	48	39	18	51	36	20	49	45	25	35	46	0.12868	0.0483789	0.0869762
ENSG00000231072	0	0	0	0	0	0	0	0	0	0	0	0	0	0	0	0	0	0	0	0	0	0	0	0	0	0	0	0	0	0	0	0	0	0	0	0	2	0	0	0	0	0	0	0	0	0	0	0	0
ENSG00000273406	0	0	0	0	1	0	0	0	0	0	0	0	0	0	0	0	0	0	0	0	0	0	0	0	0	0	2	0	0	0	0	0	0	0	0	0	0	0	0	0	0	0	0	0	0	0	0	0	0
ENSG00000276216	2	8	10	1	9	12	7	5	9	3	10	11	0	8	7	6	6	3	18	27	25	30	14	16	7	25	31	12	41	26	17	15	4	9	4	4	6	8	7	24	18	14	15	10	8	12	0.18616	0.839869	0.943705
ENSG00000185946	1171	983	1106	897	1114	1107	932	907	854	1083	1012	995	1174	1118	1610	1193	1413	1577	2853	3068	3340	2868	3201	2154	2166	2419	2408	1646	2343	2300	1505	1800	1252	1529	1395	1453	1513	1280	1310	2604	3437	3343	2502	2987	3013	3555	5.50777	5.2148	5.27416
ENSG00000162627	18	15	21	16	9	29	0	0	0	0	0	2	12	32	40	29	28	28	0	0	0	0	0	0	0	5	1	0	4	0	0	0	10	6	6	8	13	10	6	32	64	64	68	81	83	77	0.281266	0.264364	0.332694
ENSG00000134262	718	651	682	613	722	652	782	688	768	855	789	737	560	496	648	561	618	697	777	848	862	797	930	560	437	1001	987	646	912	932	657	668	746	819	698	804	770	621	778	1209	1600	1643	1196	1387	1523	1657	3.96622	4.05601	3.81959
ENSG00000226715	0	0	0	0	0	0	0	0	0	0	0	0	0	0	0	0	0	0	0	0	2	0	0	0	0	0	0	0	0	0	0	0	0	0	0	0	0	0	0	0	0	0	0	0	0	0	0	0	0
ENSG00000186141	4767	4155	4808	3768	4925	4666	3812	3943	4199	4371	4581	4352	4449	4144	5511	4642	5422	5865	2342	2511	2897	2349	2800	1719	1678	3129	2627	1777	2597	2845	1676	2067	3576	3916	3686	3715	3964	3527	3270	3615	4772	4659	3771	4044	4615	4779	32.829	32.2737	33.5705
ENSG00000031698	6169	5359	5850	5012	6464	5927	5069	5029	5085	5581	5658	5174	3910	3690	4657	4071	4691	4978	1572	1667	1713	1444	1860	1089	1038	2269	2255	1472	2162	2279	1443	1551	4224	4609	4466	4684	4808	3931	3979	4244	5713	5614	4712	5116	5414	6088	51.767	50.7209	49.7707
ENSG00000162695	7732	7241	7781	6322	8309	7463	7785	7430	7710	8171	8936	8113	7673	7265	9689	7965	9371	9737	9827	10108	10707	9750	10879	7525	6959	10202	9352	6327	9004	9623	6387	5940	5706	6514	5848	5912	6652	6339	5923	7306	9931	9562	7385	8765	9406	10815	29.0388	30.6726	29.628
ENSG00000233586	1	0	1	1	0	3	0	3	0	1	1	6	0	0	0	0	0	0	2	0	2	0	5	0	1	0	0	0	0	0	0	0	0	0	1	3	1	0	3	7	7	3	4	6	3	2	0.0629606	0	0.0638334
ENSG00000226419	196	224	268	177	251	221	289	258	268	332	261	251	101	86	115	86	87	106	376	419	456	348	476	262	273	759	595	448	546	541	394	322	199	220	224	229	253	207	201	509	809	780	605	709	702	715	0.499374	0.643698	0.692283
ENSG00000134184	0	0	0	0	0	0	0	0	0	0	0	0	0	0	0	0	0	0	30	25	27	16	16	20	22	266	253	159	173	230	123	172	117	162	141	144	115	144	125	316	501	401	314	331	413	403	0	0	0
ENSG00000265808	25265	22410	24758	20076	27179	23652	20615	20266	21571	22791	23387	22156	39665	39054	49500	43023	48320	51454	8510	8854	9712	8452	9594	6530	6214	9025	7938	5361	7894	8059	5013	5001	17209	19109	17718	18166	20357	18630	18356	13577	18826	17802	14319	16606	18748	20308	90.2786	90.3176	89.6934
ENSG00000162601	1420	1132	1361	1072	1329	1234	1515	1526	1544	1741	1696	1679	1133	1178	1369	1242	1409	1414	2450	2629	2691	2433	2828	1923	1755	2734	2324	1626	2267	2552	1624	1611	1104	1127	1146	1168	1224	1054	1052	1343	2031	1916	1360	1698	1906	2105	3.49708	3.14434	3.39825
ENSG00000272031	3	8	6	1	5	2	1	5	16	11	13	4	10	6	4	2	13	6	15	6	9	9	5	4	5	3	1	4	13	5	0	2	14	7	16	7	6	9	9	1	19	7	9	7	8	16	0.0263951	0.0793883	0.053522
ENSG00000174332	0	0	0	0	2	0	2	2	2	0	7	0	0	0	0	0	0	0	1	0	1	2	1	0	0	0	0	0	0	2	0	0	0	0	0	0	0	0	0	2	0	0	0	0	1	0	0	0	0
ENSG00000134247	160	133	128	156	167	186	134	175	156	187	184	177	412	321	362	372	426	494	30	23	28	18	38	18	6	34	36	30	32	28	32	8	251	299	325	325	275	268	221	41	48	37	36	47	41	45	0.796517	0.746778	0.646048
ENSG00000215866	0	0	0	0	0	0	0	0	0	0	0	0	0	0	0	0	0	0	2	0	10	0	2	0	1	0	0	0	0	0	0	0	0	0	0	0	0	0	0	0	0	0	0	0	0	0	0	0	0
ENSG00000187481	0	0	0	0	0	0	0	0	0	0	0	0	0	0	0	0	0	0	0	0	0	0	0	0	0	0	0	0	0	0	0	0	0	0	0	0	0	0	0	0	0	0	2	0	0	0	0	0	0
ENSG00000226835	0	0	0	0	0	0	0	0	0	0	0	0	0	0	0	0	0	0	0	0	0	0	0	0	0	0	1	0	0	0	0	0	0	2	0	0	0	0	0	0	0	0	0	0	0	0	0	0	0
ENSG00000116752	5589	4931	5270	4396	5909	5304	4384	4151	4403	5026	4836	4806	5809	5751	7387	5866	6993	7675	4164	4277	4514	4117	4665	3119	3204	3703	3622	2413	3442	3758	2447	2649	4703	5127	4787	5440	5438	4903	4763	3622	5101	4602	3864	4304	4700	5298	140.045	139.358	133.882
ENSG00000162664	527	463	560	435	633	531	660	580	638	729	723	638	428	421	643	564	584	572	1337	1471	1549	1415	1738	1000	1023	1465	1469	996	1431	1456	886	997	615	633	686	663	704	691	596	999	1321	1101	782	1098	1149	1410	1.54909	1.53502	1.66892
ENSG00000236866	0	0	0	1	4	0	0	1	0	0	0	2	0	0	0	0	0	0	18	17	19	30	22	28	20	23	27	13	28	27	9	5	0	6	7	4	0	7	3	0	0	0	0	0	0	0	0	0	0
ENSG00000286172	0	1	3	0	3	3	3	3	4	0	1	2	0	1	1	1	0	0	0	0	0	0	0	0	1	2	2	4	3	0	0	2	0	0	0	0	0	0	0	2	0	0	4	0	1	0	0	0.258364	0.696735
ENSG00000134253	122	130	129	127	182	135	124	113	101	95	105	98	56	66	81	59	59	66	91	120	145	122	135	81	52	129	121	71	110	112	80	79	199	180	234	230	196	190	129	33	37	25	42	64	30	46	0.902118	1.08421	0.967103
ENSG00000277655	0	0	0	0	0	0	0	0	0	0	0	0	0	0	0	0	0	0	0	0	0	0	0	0	0	2	2	2	1	0	3	1	0	0	0	0	0	0	0	2	0	4	4	1	0	0	0	0	0
ENSG00000233730	0	0	2	0	0	0	1	6	0	1	2	0	0	0	4	2	2	8	4	6	4	1	1	1	9	3	3	0	6	5	0	0	0	0	0	0	0	0	0	1	6	5	13	5	13	5	0	0	0.133387
ENSG00000223416	8	0	2	0	4	38	1	2	7	4	3	3	4	6	6	5	3	1	6	4	1	0	0	4	1	4	5	2	0	1	0	1	2	6	3	2	1	3	0	4	8	4	2	9	9	5	0.7425	0	0.188199
ENSG00000213226	2	0	2	0	0	8	0	0	0	0	0	0	0	0	0	0	0	0	0	0	0	0	0	0	0	0	0	0	0	0	0	0	0	0	0	0	0	0	0	0	0	2	0	2	0	0	0.0672891	0	0.068222
ENSG00000179571	0	0	0	0	0	0	0	0	0	0	0	0	0	0	0	0	0	0	0	0	0	0	0	0	0	0	0	0	0	0	0	0	0	0	0	0	0	0	0	0	0	0	0	0	0	0	0	0	0
ENSG00000231752	17	24	16	14	17	18	13	12	18	24	20	14	16	14	14	15	25	23	37	14	29	33	12	21	6	50	41	17	82	42	33	49	43	46	77	49	49	54	46	56	135	79	91	100	107	120	0.0955751	0.152185	0.0912001
ENSG00000227850	5	3	10	1	5	1	3	3	5	14	5	2	2	1	2	2	1	2	2	2	2	2	2	1	4	2	0	4	2	1	2	1	4	6	1	5	2	0	2	3	6	4	1	1	3	3	0.897188	0.607155	1.81925
ENSG00000235777	14	4	8	8	1	12	13	6	8	12	8	8	8	5	15	3	5	13	10	2	2	12	3	0	0	9	15	12	4	14	11	12	2	6	9	1	4	8	4	6	0	4	6	11	6	2	0.464253	0.149607	0.268966
ENSG00000260246	0	0	0	0	0	0	0	0	0	0	0	0	0	0	0	0	0	0	0	0	0	0	0	0	0	1	1	0	2	2	0	0	1	1	2	0	0	1	1	2	0	1	3	1	1	2	0	0	0
ENSG00000173218	27	19	36	39	29	45	28	16	28	52	24	27	13	13	11	6	8	19	15	16	16	9	29	12	10	8	14	11	21	16	8	17	54	45	66	48	61	40	47	4	5	4	2	2	0	2	0.0964142	0.0765237	0.130335
ENSG00000168509	2	0	0	0	0	0	0	0	0	0	0	0	0	2	0	0	0	0	0	2	0	2	0	0	0	0	0	0	0	0	0	0	0	0	0	0	0	0	0	2	0	1	2	4	2	0	0.0267153	0	0
ENSG00000285532	2	0	3	0	0	0	0	0	0	0	0	0	0	0	0	2	1	0	0	6	3	1	3	2	2	2	8	3	3	1	5	4	0	0	0	0	0	0	0	0	0	0	0	0	0	0	0.0637057	0	0.0968833
ENSG00000232650	0	0	0	0	0	0	0	0	0	0	0	0	0	0	1	0	1	0	2	0	0	0	0	0	0	2	3	2	4	2	2	4	0	0	0	0	0	0	0	0	0	0	0	0	0	0	0	0	0
ENSG00000121933	26	34	33	32	18	30	16	16	21	2	22	20	29	37	69	62	62	75	6	9	6	3	8	4	11	0	4	2	4	6	0	2	27	20	10	25	12	19	15	20	21	25	12	15	12	32	0.345868	0.51013	0.445073
ENSG00000183508	541	482	450	438	500	484	575	562	633	640	783	687	449	438	520	454	521	559	4668	4784	5366	4635	5334	3375	3096	6012	5329	3762	5265	5358	3406	3362	2317	2449	2353	2419	2639	2191	2231	967	1177	1140	983	1040	1114	1271	3.09049	3.10558	2.60629
ENSG00000227712	6	3	2	0	4	0	2	0	1	2	2	1	0	0	11	2	2	0	0	0	5	3	3	7	0	2	2	2	0	2	0	7	2	3	7	1	2	3	2	7	7	16	10	3	12	8	0.0663446	0.0374145	0.0224215
ENSG00000174827	5	5	7	8	13	6	5	3	28	5	14	12	4	6	8	11	13	5	27	37	29	64	35	8	18	14	20	6	12	21	10	3	9	16	16	12	25	15	16	13	43	43	28	34	44	48	0.0651185	0.0734462	0.0924298
ENSG00000236806	0	2	0	8	4	3	2	0	0	1	0	4	0	4	0	0	0	1	0	0	0	0	0	0	0	0	0	0	0	0	0	0	0	0	0	0	0	0	0	2	1	2	5	8	6	5	0	0.091646	0
ENSG00000272150	6	10	7	5	9	12	5	16	7	16	8	14	23	10	32	19	16	20	11	9	5	4	12	11	3	10	17	13	13	11	6	8	11	14	17	1	10	3	13	11	25	12	18	29	12	18	0.0506383	0.0951902	0.059897
ENSG00000234283	0	0	0	0	0	0	1	0	0	2	1	1	2	0	2	1	2	3	0	0	0	0	0	0	0	0	3	3	0	0	3	0	0	0	0	0	0	0	0	0	0	0	0	0	0	0	0	0	0
ENSG00000237188	7	11	11	5	6	4	4	6	3	7	7	9	4	24	14	7	8	16	19	6	22	22	9	12	4	12	8	4	5	4	2	0	0	8	0	10	2	4	2	24	15	16	18	19	12	25	0.0546246	0.0968162	0.0870288
ENSG00000227212	0	0	1	0	0	2	0	0	0	1	1	0	0	0	0	0	1	1	1	1	0	0	1	0	1	0	1	0	2	0	2	3	1	3	4	1	3	2	0	6	0	5	7	6	0	2	0	0	0.0820716
ENSG00000270231	132	74	117	91	136	116	122	102	112	129	138	118	86	64	98	90	97	107	235	302	251	206	256	151	169	198	219	167	230	270	175	160	163	148	106	131	145	120	134	263	356	304	279	298	356	346	0.715222	0.452234	0.642736
ENSG00000232780	0	0	0	0	0	0	0	0	2	2	2	1	0	0	0	0	0	0	0	0	0	0	0	0	0	0	0	0	0	0	0	0	0	0	0	0	0	0	0	0	0	0	0	0	0	0	0	0	0
ENSG00000136631	2410	2231	2457	2106	2706	2583	2052	2074	2205	2418	2385	2249	2598	2612	3396	2659	3101	3484	1107	1254	1274	1099	1281	850	774	1037	966	653	995	1075	614	603	1654	1914	1849	1867	1919	1615	1714	2100	2963	2975	2341	2697	2799	3266	11.7282	12.2456	12.1227
ENSG00000261737	47	42	42	34	46	75	32	29	28	38	45	42	42	45	59	60	45	74	62	58	79	34	45	40	50	80	54	61	72	67	43	63	42	46	38	27	46	45	38	92	119	105	81	103	83	121	1.57965	1.59212	1.43117
ENSG00000264145	0	0	0	0	0	0	0	0	0	0	0	0	0	0	0	0	0	0	0	0	0	0	2	2	0	3	0	0	2	2	0	0	0	0	0	0	0	0	0	0	0	0	0	0	0	0	0	0	0
ENSG00000286019	2	0	0	5	0	2	1	0	1	1	3	0	2	0	0	0	1	0	3	4	2	3	3	7	6	1	8	1	3	2	6	2	1	3	0	0	0	0	1	1	3	2	4	2	1	0	0.058301	0	0
ENSG00000258673	0	0	0	1	0	1	0	2	2	8	3	3	0	0	0	0	0	0	0	0	0	0	0	0	0	0	0	0	0	0	0	0	0	0	0	0	0	0	0	0	0	0	0	0	0	0	0	0	0
ENSG00000265491	778	695	787	613	830	792	681	657	723	819	800	807	579	441	681	602	645	738	1221	1341	1367	1249	1326	852	832	1718	1508	1036	1557	1592	1020	1118	1154	1269	1236	1198	1381	1104	1146	776	1025	821	756	885	861	1026	2.27222	2.28939	2.33037
ENSG00000198765	0	0	0	0	0	0	0	0	0	0	0	0	0	0	0	0	0	0	0	0	0	0	0	0	0	0	0	0	0	2	0	0	2	2	6	2	3	4	1	0	0	0	0	0	0	0	0	0	0
ENSG00000287190	13	22	17	10	18	10	6	6	15	8	4	19	18	10	7	10	8	16	15	20	23	19	19	14	11	26	30	13	24	18	15	5	1	2	1	8	3	5	1	3	6	1	2	0	2	0	0.232752	0.44426	0.308587
ENSG00000277702	0	0	0	0	1	0	0	0	0	0	0	0	0	0	1	0	0	0	0	0	0	0	0	0	0	0	0	0	0	0	0	0	0	0	0	0	0	1	0	5	0	0	0	0	0	0	0	0	0
ENSG00000143398	385	326	397	319	461	387	605	622	622	643	690	585	153	161	186	191	200	294	673	670	668	697	709	489	444	1215	1053	729	952	1134	597	596	368	370	339	365	465	306	312	457	738	693	524	658	562	728	2.30065	2.19722	2.40525
ENSG00000236140	0	5	4	4	4	2	2	1	2	4	4	3	0	0	0	0	2	1	0	0	5	1	4	0	0	4	4	1	2	1	0	0	0	0	0	2	9	2	2	15	22	11	6	15	12	11	0	0.478075	0.343796
ENSG00000228084	0	1	2	0	2	0	2	1	0	1	1	2	0	0	0	0	0	0	1	2	0	1	3	1	0	5	2	0	1	0	1	3	2	4	3	3	6	10	0	1	0	1	0	0	0	0	0	0.0556173	0.0999895
ENSG00000225075	2	1	1	0	3	1	1	2	0	3	3	2	0	1	0	2	0	1	3	0	0	0	5	2	0	6	11	1	8	2	5	1	1	0	1	0	3	0	0	2	1	1	3	2	5	1	0.14387	0.0811343	0.0729322
ENSG00000196505	1853	1600	1823	1490	1951	1773	1923	1948	1974	2102	2191	2001	979	940	1267	990	1200	1275	629	724	675	693	693	436	400	1088	1035	694	1005	1055	645	620	775	850	817	758	876	723	825	936	1244	1152	1083	1149	1140	1342	5.70703	5.55801	5.69247
ENSG00000117360	1372	1222	1420	1078	1520	1354	1581	1650	1677	1756	1825	1655	911	887	1064	1014	1068	1192	2279	2293	2623	2368	2655	1613	1558	4496	3979	2659	4104	4176	2324	2193	1564	1758	1605	1603	1784	1507	1483	2352	3291	3245	2587	2925	3027	3244	8.19414	8.23162	8.59839
ENSG00000154451	31025	27404	30613	25382	33303	30572	29271	27975	30037	31279	32983	30244	23898	22872	29046	25557	28590	31095	9854	9795	10783	9708	11162	7075	6692	19043	17045	11579	16561	17938	10815	11007	22053	24692	23051	23874	25599	22196	21577	7121	9860	9323	7549	8373	9030	10362	123.059	122.597	123.108
ENSG00000225871	6	2	6	0	5	6	4	8	2	1	8	2	5	9	10	6	1	4	14	2	8	7	9	1	5	3	5	2	5	5	4	3	6	1	8	8	2	1	5	13	18	16	8	8	9	7	0.115421	0.043394	0.117022
ENSG00000223489	0	0	0	0	0	0	0	0	0	0	0	0	0	0	0	0	0	0	0	0	0	0	0	0	0	2	2	0	5	2	0	0	0	0	0	0	0	0	0	0	0	2	0	0	0	0	0	0	0
ENSG00000118655	128	72	73	91	141	75	151	96	129	161	141	156	53	69	82	75	63	75	44	45	54	48	108	38	37	35	35	12	24	51	13	29	171	213	169	211	213	186	160	77	115	104	76	101	121	114	1.06883	0.678105	0.618019
ENSG00000269713	104	87	112	99	133	91	121	116	109	113	189	143	92	88	98	62	82	76	219	209	297	261	218	148	153	287	309	216	259	307	192	192	145	173	152	164	189	124	150	284	326	307	195	366	370	329	0.371332	0.350359	0.40544
ENSG00000213262	4	2	2	2	4	9	8	8	3	4	7	3	5	5	2	6	3	12	21	34	30	27	24	14	18	28	41	33	30	40	31	26	0	0	0	0	0	0	1	2	7	10	7	5	2	4	0.156033	0.0879935	0.0790979
ENSG00000274423	19	14	13	6	11	14	15	7	14	11	15	7	6	2	5	11	7	5	0	3	4	0	5	2	0	1	2	6	4	0	1	4	2	13	6	9	0	15	14	14	11	20	6	14	6	15	1.07099	0.89007	0.742941
ENSG00000285554	37	36	31	37	39	30	48	48	42	36	44	48	77	62	61	82	67	83	59	35	25	38	37	28	29	84	97	42	73	57	32	35	4	12	9	10	4	5	8	14	26	16	38	25	20	16	1.03468	1.13546	0.878912
ENSG00000232536	0	0	0	0	0	0	0	1	0	1	0	2	0	0	0	0	0	0	0	3	0	0	0	0	0	2	0	4	4	2	0	0	0	0	0	0	0	0	0	0	0	0	0	0	0	0	0	0	0
ENSG00000287015	0	0	0	0	0	0	0	0	0	2	0	0	2	2	2	5	4	4	0	0	0	0	0	0	0	0	0	0	0	0	0	0	1	5	0	2	0	3	0	0	0	0	0	0	0	0	0	0	0
ENSG00000256374	0	0	0	0	0	0	0	0	0	0	0	0	0	0	0	0	0	0	0	0	0	0	0	0	0	0	0	0	0	0	0	0	0	0	1	1	2	2	0	0	0	2	1	0	2	4	0	0	0
ENSG00000268043	320	291	303	220	366	300	332	323	338	380	345	386	302	277	383	322	272	388	540	570	590	578	636	368	356	579	641	406	577	625	434	334	369	422	385	494	444	361	315	599	673	750	660	693	701	783	1.42129	1.45777	1.36444
ENSG00000241720	0	0	0	0	0	0	0	0	0	0	0	0	0	0	0	0	0	0	0	0	0	0	0	0	0	0	0	0	0	0	0	0	1	0	0	2	0	0	0	0	0	0	0	0	0	0	0	0	0
ENSG00000116489	182158	159426	177896	143527	190150	171498	139962	134966	141919	149655	159246	146592	313950	309528	386463	334150	373122	411954	194109	197709	217009	190542	216383	142539	135540	130607	120650	82539	117000	125047	76589	70110	181002	199734	189409	192974	208393	187000	181338	134201	183707	174496	139171	161299	175041	198312	1683.4	1661.74	1666.8
ENSG00000235526	0	0	0	0	0	0	0	0	0	0	0	0	0	0	0	0	0	0	0	0	0	0	0	0	0	0	0	0	0	0	0	0	0	0	0	0	0	0	0	0	0	0	0	0	2	0	0	0	0
ENSG00000228347	0	0	2	0	2	0	0	0	1	0	0	0	0	1	0	0	0	0	0	0	0	0	0	0	0	0	0	0	0	0	0	0	0	0	0	0	0	0	0	0	0	0	0	0	0	0	0	0	0.124749
ENSG00000276975	0	12	4	4	6	3	2	2	10	0	5	2	0	0	0	4	0	3	4	2	4	3	4	0	0	1	2	0	4	5	1	0	2	2	0	10	0	6	2	2	0	0	0	2	0	0	0	0.0247804	0.0074251
ENSG00000236012	0	0	0	0	0	0	0	1	0	4	3	2	0	0	0	1	0	0	0	0	0	0	0	0	0	0	0	0	0	0	0	0	0	0	0	0	0	0	0	0	0	0	0	0	0	0	0	0	0
ENSG00000270911	12	8	19	19	12	9	16	13	18	13	17	15	20	11	35	14	16	15	14	12	15	18	15	28	25	17	23	10	20	18	7	14	16	24	31	27	24	43	26	12	14	13	21	7	12	14	0.30982	0.232961	0.49735
ENSG00000272824	0	0	0	0	0	0	2	0	0	0	0	0	0	0	0	2	0	0	0	2	0	0	0	0	0	0	0	0	0	0	0	0	0	0	0	0	0	0	1	0	0	0	0	0	0	0	0	0	0
ENSG00000155367	5	4	3	4	3	2	1	2	3	1	4	0	3	1	6	2	9	1	3	3	4	3	0	7	3	8	3	4	2	4	2	1	0	0	0	0	0	0	0	5	6	4	8	2	3	0	0.0561913	0.0507019	0.0341822
ENSG00000134200	0	0	0	0	0	0	0	0	0	0	0	0	5	7	7	4	3	7	4	3	4	5	6	5	5	0	1	0	3	2	0	0	0	0	0	0	0	0	0	0	0	0	0	0	0	0	0	0	0
ENSG00000143442	990	863	878	792	1099	1043	1180	1095	1308	1333	1352	1329	590	623	768	715	739	736	1723	1750	1886	1825	1994	1349	1330	2314	2046	1412	2067	2139	1423	1382	1275	1521	1421	1458	1539	1422	1324	1598	2123	2198	1719	1968	2115	2340	3.10414	3.05198	2.79113
ENSG00000274019	0	0	0	0	0	0	0	0	0	0	0	0	0	0	0	0	0	0	1	0	2	0	1	0	0	2	0	0	0	0	0	0	6	2	7	6	4	0	9	0	0	0	2	0	2	0	0	0	0
ENSG00000118292	278	261	247	200	281	317	247	211	216	242	249	222	511	529	618	514	621	667	137	165	160	164	139	90	80	224	196	152	212	221	115	93	1160	1284	1227	1206	1286	1077	1047	366	515	470	389	418	402	472	7.07012	7.48665	6.36882
ENSG00000231128	23	17	19	9	10	18	12	7	14	9	13	11	2	1	0	7	0	8	11	7	9	10	13	7	1	28	31	22	40	32	20	16	24	14	6	11	17	5	12	11	15	8	8	11	16	17	0.469578	0.391465	0.39329
ENSG00000065183	595	528	588	477	592	651	694	582	646	791	758	683	422	493	526	506	522	575	549	629	690	638	646	399	360	616	564	338	550	561	383	369	919	984	915	963	1029	835	848	1091	1519	1407	1115	1413	1428	1578	1.87016	1.87181	1.87378
ENSG00000023902	1217	1088	1344	991	1215	1135	1195	1007	1221	1397	1308	1228	666	618	900	719	873	951	379	388	456	403	495	307	306	700	660	504	679	688	444	457	931	1002	889	913	1015	788	802	478	681	643	609	603	583	754	5.92964	5.97904	6.63922
ENSG00000227082	4	0	0	2	0	0	0	9	20	6	10	4	10	6	3	4	6	4	4	0	1	1	1	1	2	5	3	3	11	4	9	0	2	6	14	10	7	10	16	15	19	24	8	29	28	22	0.0272736	0	0
ENSG00000226126	0	0	0	0	0	0	0	0	0	0	0	0	0	0	0	0	2	0	0	0	0	0	0	0	0	0	0	0	0	0	0	0	0	0	0	0	0	0	0	0	0	0	0	0	2	0	0	0	0
ENSG00000163393	236	237	183	240	261	265	240	177	200	257	270	248	244	231	301	281	312	343	53	26	56	46	58	20	27	50	58	34	56	50	24	49	156	126	134	144	144	148	145	70	89	68	67	55	67	105	1.44448	1.63611	1.13561
ENSG00000131778	75	52	55	47	53	56	73	65	72	79	71	64	31	35	47	54	55	74	106	148	158	121	111	98	77	130	107	84	84	116	60	94	86	100	110	86	103	114	74	74	95	75	73	97	110	125	0.56322	0.440438	0.418754
ENSG00000163156	3206	2827	3245	2578	3582	3027	2689	2595	2688	2887	2985	2678	3818	3760	4739	4215	4762	4893	2986	3051	3265	2853	3200	2006	1889	2687	2453	1816	2533	2615	1642	1580	4574	5111	5236	5212	5426	4370	4266	3840	5497	5450	4480	4965	4969	5564	31.7248	31.552	32.5559
ENSG00000143631	0	0	0	0	0	0	0	0	0	0	0	0	0	1	0	0	0	0	0	4	0	0	0	1	2	4	2	0	2	0	1	0	1	0	0	0	0	0	0	0	0	0	0	0	0	0	0	0	0
ENSG00000254539	2	3	0	1	2	0	2	0	0	4	0	0	2	0	0	0	0	1	0	0	5	2	0	2	0	0	0	0	0	0	0	0	0	0	0	0	0	0	0	0	0	0	0	0	0	0	0.0743355	0.125763	0
ENSG00000159377	14457	13004	14552	11970	15477	14409	12078	11799	11973	12718	13599	12717	19612	18290	23594	20565	23378	24724	22210	22972	25442	22473	25402	14718	14370	19471	17852	12829	18043	19462	11114	10895	16054	17637	16538	17685	18953	15175	14794	12234	17055	16604	13186	14602	14532	16768	219.738	222.93	224.248
ENSG00000270339	0	1	0	0	0	0	0	0	0	0	0	0	0	0	0	0	0	0	0	0	0	0	2	0	0	3	2	0	12	4	4	2	0	0	0	4	2	0	0	4	3	0	0	0	3	2	0	0.0551959	0
ENSG00000228453	0	0	0	0	0	0	0	0	0	0	0	0	0	0	0	0	0	0	2	2	3	6	0	0	0	0	0	0	0	0	0	0	0	0	0	0	0	0	0	0	0	0	0	0	0	0	0	0	0
ENSG00000274642	60	49	47	18	51	49	39	33	43	69	52	49	28	39	43	37	42	29	0	3	10	5	11	2	4	0	0	0	0	1	2	0	1	3	2	4	7	4	7	0	0	1	0	3	0	1	2.27189	2.09266	1.80432
ENSG00000177551	2	2	0	0	0	2	0	0	0	0	0	0	0	0	0	0	0	0	0	0	0	0	2	0	0	0	0	0	0	0	0	0	0	0	0	0	0	0	0	0	0	0	0	0	0	0	0.00856618	0.00966166	0
ENSG00000197323	2507	2131	2437	2042	2568	2428	3350	3263	3307	3760	3763	3292	1514	1539	2049	1693	1919	2174	2046	2071	2185	2005	2320	1493	1402	2633	2383	1685	2413	2393	1554	1552	1653	1682	1759	1619	1829	1792	1533	1937	2691	2631	2236	2502	2634	3041	8.43118	8.08318	8.30939
ENSG00000213244	0	0	0	0	0	0	0	0	0	0	0	0	0	0	0	0	0	0	0	0	0	0	0	0	0	0	0	0	1	0	0	0	0	0	0	0	0	0	0	0	0	0	0	0	0	0	0	0	0
ENSG00000233029	1	0	0	0	2	4	0	2	3	4	0	2	4	5	18	9	12	4	10	6	17	6	2	6	4	40	53	44	38	60	22	34	2	0	0	4	0	0	0	0	0	0	0	0	0	0	0.00911622	0	0
ENSG00000237975	6	0	6	3	6	2	1	0	2	1	1	0	19	10	12	14	22	14	13	6	8	9	9	9	10	4	4	0	0	4	0	2	0	0	0	3	4	0	3	11	16	12	10	9	7	26	0.0129368	0	0.0131161
ENSG00000261168	0	0	0	0	0	0	3	0	0	0	0	0	0	0	0	0	0	2	0	0	0	0	0	0	2	0	0	0	0	0	0	0	10	24	4	6	2	2	6	1	0	0	0	0	0	2	0	0	0
ENSG00000271419	0	0	0	0	0	0	0	0	0	0	0	0	0	0	0	0	0	0	0	0	0	0	0	0	0	0	0	0	0	0	0	0	0	0	0	0	0	0	0	2	4	0	4	0	2	1	0	0	0
ENSG00000178104	2124	1928	2117	1798	2373	2066	2036	2007	2329	2171	2394	2148	1781	1515	2039	1705	1911	2131	217	229	270	219	197	160	144	158	173	137	164	171	119	130	1708	1944	1635	1746	1853	1628	1473	1124	1565	1476	1236	1400	1476	1579	2.48353	2.54265	2.50966
ENSG00000079335	539	433	527	447	598	522	508	527	593	613	557	572	347	318	370	325	340	389	812	847	965	899	894	594	558	1231	1184	752	1069	1100	650	731	896	1023	951	913	1015	953	822	875	1107	1106	858	1006	973	1088	2.6742	2.42302	2.65091
ENSG00000143119	14192	12736	14236	11725	14816	13705	13404	12539	13435	14178	15002	13544	12411	11815	14626	13027	14820	15917	8345	8271	9095	8257	9291	5654	5572	10249	9279	6268	8893	9555	6005	5849	9880	11136	10318	11269	11780	10223	9815	7280	9514	9233	7340	8732	9127	9979	213.004	215.596	216.626
ENSG00000285215	0	4	3	2	0	3	8	11	6	4	1	5	0	9	7	2	8	2	11	9	2	10	11	4	5	17	14	12	13	19	12	12	30	34	37	33	28	18	24	20	34	16	27	35	29	34	0	0.102618	0.0691829
ENSG00000227733	0	2	5	0	4	1	0	0	0	0	0	0	0	3	8	3	0	11	0	0	3	0	2	0	2	3	0	3	0	0	0	1	0	0	0	2	0	0	0	0	0	0	0	0	0	0	0	0.00453891	0.0102001
ENSG00000226167	9	4	11	9	16	7	7	12	9	12	18	10	3	5	4	5	0	3	17	20	23	32	20	7	14	27	6	9	10	17	15	7	9	24	12	14	26	20	22	8	21	29	20	20	25	28	0.167641	0.0840353	0.207735
ENSG00000117362	143	99	150	85	149	130	240	205	174	198	220	228	67	36	88	106	74	86	103	85	112	94	133	85	85	265	198	162	228	205	134	150	100	97	93	82	142	97	96	76	123	99	105	103	89	121	1.32989	1.03844	1.41433
ENSG00000160685	64	74	40	52	55	76	32	49	37	62	63	72	24	35	43	32	46	55	3	3	6	6	6	2	4	12	18	9	18	11	8	10	59	81	69	78	59	44	54	20	29	31	26	25	32	30	0.480391	0.626486	0.304407
ENSG00000233432	2	0	0	0	2	0	4	4	3	4	0	0	2	0	2	4	2	6	7	3	2	2	4	2	0	1	6	2	0	2	0	0	0	0	0	0	2	0	0	2	1	2	2	2	0	4	0.0417297	0	0
ENSG00000229911	0	0	0	0	2	0	0	0	0	0	0	0	0	0	0	0	0	0	0	0	0	0	0	0	0	0	0	0	0	0	0	0	0	0	0	0	0	0	0	0	0	0	0	0	0	0	0	0	0
ENSG00000224481	1	3	1	2	0	4	0	0	0	0	0	0	0	0	0	0	0	0	10	2	2	3	11	0	0	1	3	1	2	1	6	2	0	4	1	0	0	3	0	0	0	0	0	0	0	0	0.00953892	0.0322764	0.00967116
ENSG00000143520	0	0	0	0	0	0	2	0	6	0	0	2	0	0	0	0	4	0	165	214	228	206	228	127	113	108	122	54	96	133	39	25	0	0	0	4	0	0	0	0	0	0	0	0	0	0	0	0	0
ENSG00000171943	583	552	738	539	738	635	550	523	647	455	604	618	773	797	1004	794	896	909	695	755	771	746	857	543	477	2101	1908	1318	1854	1990	1213	1106	498	572	547	552	575	564	503	456	689	517	466	560	584	622	2.56717	2.74151	3.29474
ENSG00000196734	2	2	2	1	2	2	0	0	0	0	0	0	0	0	0	1	2	0	0	0	0	0	0	0	0	0	0	0	0	0	0	0	0	0	0	0	0	0	0	0	0	0	0	0	0	0	0.0567641	0.0640234	0.0575511
ENSG00000270719	0	0	0	0	0	0	0	0	0	0	0	0	0	0	0	0	0	0	0	0	0	0	0	0	0	0	0	0	0	0	0	0	0	0	0	0	0	0	0	0	0	0	0	0	0	0	0	0	0
ENSG00000155761	0	0	2	3	0	0	2	3	0	3	0	2	0	3	1	0	0	0	9	4	7	10	11	6	3	6	15	7	4	15	2	25	0	1	0	5	2	2	2	1	5	7	5	5	6	1	0	0	0.00666393
ENSG00000159208	81	71	77	47	69	49	55	91	54	88	81	58	61	55	85	67	77	69	9	24	24	16	32	17	10	4	8	16	15	20	16	10	32	24	45	32	42	30	22	6	16	22	2	13	13	10	0.918287	0.907855	0.885042
ENSG00000143373	100	86	79	68	101	63	104	73	117	106	88	117	35	41	53	31	43	56	181	179	197	197	203	124	130	241	241	150	238	258	154	172	69	95	63	102	91	72	60	72	122	133	111	109	98	110	0.510733	0.495402	0.409073
ENSG00000230806	4	13	4	3	5	10	14	17	15	10	10	13	2	7	8	2	8	2	9	30	18	23	35	23	13	66	97	40	60	73	48	40	6	10	6	15	10	7	11	3	12	4	8	2	3	11	0.0487713	0.178777	0.0494474
ENSG00000116830	398	361	397	308	409	387	457	471	483	557	618	476	367	271	407	310	332	371	529	480	562	476	558	346	335	764	683	534	693	773	448	499	480	563	572	500	582	537	467	411	514	562	358	454	492	573	1.2655	1.29464	1.27982
ENSG00000143556	0	0	0	2	0	0	0	0	0	0	0	0	0	0	0	0	0	0	0	0	0	0	0	0	0	0	0	0	0	0	0	0	0	0	0	0	0	0	0	0	0	0	0	0	0	0	0	0	0
ENSG00000286219	77	59	88	67	69	90	107	114	91	91	99	107	34	41	63	28	41	37	222	244	276	246	259	205	221	394	272	215	284	293	209	197	73	108	101	65	104	59	71	198	268	234	132	188	161	249	0.46547	0.40227	0.539341
ENSG00000227242	26	25	18	39	15	26	45	41	41	46	33	47	12	9	4	17	7	22	34	30	19	30	41	24	23	31	32	12	30	43	9	17	46	71	81	61	56	39	41	95	166	148	98	135	125	154	0.470986	0.510787	0.330588
ENSG00000234422	0	0	0	0	0	0	0	0	0	0	0	0	0	0	0	0	0	0	0	0	0	0	0	0	0	0	0	0	0	0	0	0	0	0	0	0	0	0	0	0	0	0	0	0	0	0	0	0	0
ENSG00000163218	0	0	0	0	1	1	14	5	10	4	2	6	0	0	0	0	0	0	0	0	0	0	2	0	0	0	0	0	0	0	2	0	7	22	12	17	15	20	13	2	4	2	4	1	0	5	0	0	0
ENSG00000231246	0	0	0	0	0	0	0	0	0	0	0	0	0	0	0	0	0	0	96	112	119	110	132	80	72	171	134	110	145	146	74	92	0	0	0	0	0	0	0	2	0	2	0	0	0	0	0	0	0
ENSG00000227056	0	0	0	0	0	2	8	2	3	4	3	6	0	0	8	2	2	0	9	6	6	5	0	3	2	1	5	2	10	1	0	0	8	6	10	7	2	6	8	17	25	22	20	15	27	21	0	0	0
ENSG00000173207	2629	2423	2650	2242	2804	2521	2085	2026	2233	2451	2619	2314	2455	2318	3011	2667	2722	3127	211	187	237	189	231	172	154	275	273	169	307	276	213	191	3787	4515	4089	4436	4525	4003	3911	1041	1376	1549	1139	1259	1263	1388	36.2878	37.7214	37.0848
ENSG00000143614	889	705	797	664	971	863	987	952	1019	1108	1192	986	265	257	362	311	289	364	1115	1110	1137	1094	1221	671	587	2291	1908	1368	1899	1875	1176	1148	731	771	795	818	868	681	728	1370	1760	1960	1397	1613	1628	1784	3.10619	2.77831	2.82334
ENSG00000236427	0	0	0	0	0	0	0	0	0	0	0	0	2	0	0	0	0	0	0	0	0	0	0	0	0	0	0	0	2	0	0	0	6	5	4	3	6	12	6	0	2	2	1	2	1	5	0	0	0
ENSG00000169418	7	13	14	15	15	27	16	28	26	13	28	13	2	2	4	0	0	2	0	0	0	0	0	0	0	1	0	0	0	1	0	0	7	7	6	13	2	4	2	27	19	37	23	18	18	32	0.0456566	0.0956343	0.0925791
ENSG00000214204	0	0	0	0	0	0	0	0	0	0	0	0	0	0	0	0	0	0	0	0	0	0	0	0	2	0	0	0	0	0	0	0	0	0	0	0	0	0	0	0	0	0	0	0	0	0	0	0	0
ENSG00000081026	45	74	46	37	45	42	66	35	65	58	85	54	58	42	61	56	62	81	88	117	76	97	128	89	43	114	92	44	89	88	51	51	123	114	95	92	119	98	93	68	100	73	50	64	67	91	0.172741	0.320391	0.179028
ENSG00000232093	8	13	10	10	8	8	3	3	2	10	4	7	11	4	6	7	8	10	0	0	0	0	0	0	0	0	0	0	2	0	0	6	13	11	9	11	20	18	11	2	1	3	0	2	2	0	0.314343	0.576132	0.398377
ENSG00000225650	4	1	4	2	1	0	5	2	2	0	2	1	2	4	0	4	7	5	7	2	1	3	4	1	0	8	0	5	0	4	2	1	0	2	2	4	6	2	0	2	10	2	6	2	2	4	0.133466	0.0376336	0.135316
ENSG00000227179	1	3	8	0	0	0	0	0	0	0	0	0	0	0	0	0	0	0	0	0	0	0	0	0	0	0	0	2	0	0	0	0	0	0	0	0	0	0	0	0	0	0	0	0	0	0	0.0237841	0.0804771	0.19291
ENSG00000116473	1780	1514	1700	1345	2021	1719	1530	1329	1434	1581	1600	1448	1962	2023	2593	2356	2446	2752	1434	1501	1692	1396	1638	1061	1083	1541	1357	988	1354	1486	1016	1005	2733	3256	3033	2851	3172	2906	2921	1723	2108	2180	1606	1975	2194	2267	10.3926	9.96999	10.0631
ENSG00000085465	39	22	27	33	49	30	30	30	38	66	36	23	10	9	10	7	12	10	81	93	110	83	77	60	47	61	73	53	60	72	39	47	73	70	53	70	58	42	73	45	65	53	48	52	52	42	0.499862	0.318034	0.350856
ENSG00000224965	5	0	10	4	2	3	2	0	0	4	1	0	0	0	0	0	0	2	2	0	0	0	1	0	0	5	2	2	4	6	3	4	6	4	2	4	4	0	6	0	0	2	2	0	2	2	0.215901	0	0.437788
ENSG00000271380	0	0	1	0	0	2	1	0	0	0	0	0	0	0	0	0	0	0	0	0	0	0	0	0	0	0	1	0	0	3	0	0	0	0	0	1	1	0	2	0	0	0	0	0	0	0	0	0	0.0409844
ENSG00000228127	0	0	0	1	0	0	0	1	0	1	2	2	0	0	0	0	0	0	0	0	0	0	0	0	0	0	2	1	0	0	0	1	0	0	0	0	0	0	0	0	0	0	0	0	0	0	0	0	0
ENSG00000226984	3	3	4	5	0	3	2	2	1	9	2	0	5	6	14	8	8	8	10	1	8	4	11	10	1	6	2	10	14	7	8	7	0	0	0	0	1	0	0	0	0	0	0	0	0	0	0.226923	0.255944	0.306759
ENSG00000226822	69	69	45	83	60	74	47	39	46	53	37	59	194	182	240	166	232	279	34	57	32	39	25	22	21	150	143	75	107	131	72	70	22	16	21	29	26	25	26	0	3	2	10	4	8	6	0.539355	0.608331	0.35663
ENSG00000273481	0	0	0	0	0	2	2	0	3	8	0	1	0	0	0	0	0	0	0	0	0	0	0	0	0	0	0	0	0	0	0	0	0	0	0	0	0	0	0	0	0	0	0	0	0	0	0	0	0
ENSG00000186150	0	0	0	0	0	0	2	0	0	2	2	0	0	0	0	0	0	0	0	0	0	0	0	0	0	0	0	0	0	0	0	0	0	0	0	2	0	0	0	0	0	0	0	0	0	0	0	0	0
ENSG00000143554	178	116	161	142	163	201	108	113	133	125	156	150	77	86	128	69	111	124	25	30	19	21	19	12	4	18	21	11	17	4	1	13	132	184	182	173	137	127	136	42	73	111	40	55	79	83	1.05104	0.772541	0.963838
ENSG00000143458	1805	1609	1726	1452	1787	1633	1705	1718	1848	1796	2004	1888	1422	1240	1613	1529	1637	1772	3165	3305	3641	3282	3494	2200	2116	2686	2592	1854	2468	2655	1639	1511	2076	2541	2318	2361	2429	2303	2091	4473	6450	6056	4783	5507	5682	6265	6.34446	6.37879	6.15089
ENSG00000224363	0	0	0	4	0	0	2	1	0	0	3	0	0	0	3	0	1	0	5	6	11	4	2	6	3	8	7	12	11	13	3	5	0	0	1	0	0	0	0	0	2	0	0	2	0	0	0	0	0
ENSG00000223861	9	8	1	7	7	2	8	1	5	3	8	3	2	1	4	0	0	3	0	4	2	1	5	2	0	0	0	0	6	6	0	0	4	6	2	3	4	6	6	0	0	0	0	2	0	0	0.58725	0.588756	0.0661546
ENSG00000118298	24	31	30	26	19	28	21	24	27	27	27	23	14	13	8	23	23	21	65	70	73	75	85	47	63	103	90	86	101	92	66	51	44	49	44	53	68	24	39	37	46	71	74	56	86	56	0.235185	0.34263	0.298057
ENSG00000143595	8	0	0	1	0	5	0	2	0	1	0	0	0	0	0	0	0	0	6	10	7	6	0	9	16	38	44	34	57	59	28	27	0	0	0	0	0	0	0	4	2	3	0	5	0	0	0.112736	0	0
ENSG00000073754	5	1	2	0	0	1	2	0	0	6	4	3	2	0	2	0	6	0	0	0	1	0	0	0	0	0	0	0	0	2	0	0	0	0	0	0	0	0	0	2	1	0	2	0	1	0	0.0654086	0.0147547	0.0265262
ENSG00000143546	3078	2680	3040	2436	3146	2995	2599	2483	2552	3154	2730	2652	3566	3444	4132	3956	4359	4679	3078	3106	3261	3123	3287	2057	1990	5764	5493	3771	5223	5505	3394	3799	764	860	916	891	924	788	696	1212	1598	1624	1289	1493	1381	1679	111.578	109.574	111.728
ENSG00000228826	1	1	2	0	2	2	0	1	0	0	0	0	2	0	0	2	2	0	13	5	10	5	14	6	10	13	5	8	3	9	8	4	0	0	0	0	0	0	0	13	7	10	7	2	4	6	0.0593727	0.0669656	0.120392
ENSG00000233907	0	0	0	0	0	0	0	0	0	0	0	0	0	0	0	0	0	0	0	0	0	0	0	2	0	0	0	0	0	0	0	0	0	0	0	0	0	0	0	0	0	0	0	0	0	0	0	0	0
ENSG00000225036	0	0	0	0	0	0	0	0	0	0	0	0	0	0	0	0	0	0	2	7	2	2	0	0	0	0	2	4	6	6	3	8	0	0	0	0	0	0	0	0	0	0	0	0	0	0	0	0	0
ENSG00000237842	18	30	16	19	17	10	10	24	17	31	16	12	20	18	18	9	11	22	26	14	6	6	20	2	7	10	13	8	7	10	5	15	14	21	14	10	15	9	5	11	9	20	25	23	9	15	0.379737	0.713833	0.342224
ENSG00000228420	0	0	0	0	0	0	0	1	0	0	2	1	0	0	0	0	0	0	0	0	0	0	0	0	0	0	1	0	2	0	0	0	0	0	0	0	0	0	0	0	0	0	0	0	0	0	0	0	0
ENSG00000275296	0	0	0	0	0	0	0	0	0	0	0	0	0	0	0	0	0	0	0	0	0	0	0	0	0	0	2	4	0	0	0	0	0	0	0	0	0	0	0	0	0	0	0	0	0	0	0	0	0
ENSG00000233839	0	0	0	0	0	0	0	0	0	0	0	0	0	0	2	0	0	0	2	0	0	2	0	0	0	6	4	0	2	2	0	0	2	4	2	2	4	2	4	4	0	2	2	4	1	4	0	0	0
ENSG00000261595	1	0	4	0	0	1	0	0	0	0	0	0	0	0	0	0	0	0	0	0	0	0	0	0	0	0	0	0	0	0	0	0	0	0	0	0	0	0	0	0	0	0	0	0	0	0	0.0151994	0	0.0616406
ENSG00000250890	0	0	0	0	0	0	3	3	0	0	4	0	0	0	0	0	0	0	0	0	0	0	0	0	0	0	0	0	0	0	0	0	0	0	0	0	0	0	0	0	0	4	0	1	0	5	0	0	0
ENSG00000143416	0	0	0	0	0	0	0	0	0	0	0	0	0	0	0	0	0	0	14	14	16	9	16	11	8	6	6	4	0	2	6	0	0	0	0	0	0	0	0	0	0	0	0	0	0	0	0	0	0
ENSG00000227217	0	0	0	0	0	0	0	0	0	0	1	0	0	0	0	0	0	0	3	2	2	4	5	2	2	13	4	4	2	8	0	4	0	0	0	0	0	0	0	2	0	14	1	11	15	2	0	0	0
ENSG00000272583	0	4	2	0	0	2	6	2	2	6	6	9	0	4	8	0	0	4	9	11	11	9	6	4	3	13	8	8	6	9	16	12	6	4	2	2	2	4	2	8	5	14	5	14	18	17	0	0.314046	0.141149
ENSG00000231827	2	0	0	2	5	2	2	1	0	2	5	1	0	0	0	0	0	0	0	0	0	0	0	0	0	1	0	3	0	0	0	0	1	0	0	0	0	0	0	1	1	0	2	0	0	0	0.0280493	0	0
ENSG00000280649	70	48	42	40	56	61	39	42	34	54	47	55	3	7	12	18	17	25	73	111	72	68	69	35	49	173	163	109	174	123	67	106	56	56	61	73	51	61	51	81	97	103	80	79	70	99	2.13697	1.65275	1.29996
ENSG00000260948	4	2	2	2	4	2	12	2	8	4	10	12	6	8	8	16	8	7	23	15	13	14	11	8	6	14	16	3	4	16	4	7	8	7	6	6	8	4	2	3	8	6	2	4	2	2	0.0638631	0.0360151	0.0323742
ENSG00000131781	108	86	118	105	141	125	191	155	194	189	195	199	106	87	82	73	125	162	202	226	202	171	195	146	118	256	198	159	209	211	169	142	116	134	122	74	130	104	106	193	237	230	156	242	234	261	0.582932	0.523549	0.645737
ENSG00000286106	2	0	1	1	7	2	2	1	4	3	4	5	0	0	0	1	2	0	20	12	21	20	15	21	18	0	0	0	0	0	0	0	0	2	0	2	2	0	3	1	0	0	0	0	0	0	0.0581436	0	0.0294748
ENSG00000276509	0	0	0	0	0	2	0	0	0	0	0	0	0	3	2	0	2	4	0	0	1	0	0	0	0	0	0	0	0	0	0	0	0	0	0	0	0	0	0	5	2	6	1	2	0	2	0	0	0
ENSG00000223599	31	14	26	8	25	19	29	24	26	24	23	20	3	6	10	8	3	13	28	38	43	36	41	36	23	40	24	34	40	39	17	13	16	14	12	3	13	11	9	21	38	28	14	21	24	48	0.764906	0.389618	0.650428
ENSG00000121851	2430	2148	2419	1988	2419	2311	2029	1754	1922	2136	2220	2028	2923	2935	3752	3215	3512	4085	1438	1456	1560	1457	1560	1000	904	1316	1141	811	1075	1205	730	712	1392	1681	1573	1668	1750	1424	1493	2157	2902	2792	2288	2594	2758	3032	43.3385	43.2082	43.7404
ENSG00000233792	0	0	0	0	0	0	0	0	0	0	0	0	0	0	0	0	0	0	0	0	0	0	0	2	0	0	0	0	0	0	0	0	0	0	0	0	0	0	0	0	0	0	0	0	0	0	0	0	0
ENSG00000283342	0	0	0	0	0	0	0	0	0	0	0	0	0	0	0	0	0	0	0	0	0	0	0	0	0	0	0	0	2	0	0	0	0	0	0	0	0	0	0	0	0	0	0	0	0	0	0	0	0
ENSG00000226026	12	5	4	5	6	15	2	1	0	2	4	9	0	6	2	0	0	0	7	5	8	4	2	1	12	0	0	4	2	3	5	3	0	2	6	6	3	0	6	0	6	6	6	2	7	7	0.0951363	0.0447095	0.0321517
ENSG00000230921	0	0	0	0	0	0	0	0	0	0	0	0	0	0	0	0	0	0	0	0	0	0	0	0	0	0	0	0	0	0	0	0	0	0	0	0	0	0	0	0	0	0	0	0	0	0	0	0	0
ENSG00000286151	0	0	0	0	0	0	0	0	0	0	0	0	0	0	0	0	0	0	0	2	4	0	0	0	0	4	4	1	3	3	0	5	0	0	0	0	0	0	0	2	0	0	2	1	2	4	0	0	0
ENSG00000134202	859	735	799	620	857	773	808	760	801	849	911	794	662	583	793	724	723	844	202	196	241	168	240	106	126	31	41	25	31	29	28	31	381	405	371	349	316	325	280	478	719	665	483	605	613	708	5.84098	5.63695	5.50831
ENSG00000285184	16	12	11	12	26	14	9	13	11	8	5	18	9	2	3	4	3	11	5	3	0	2	0	0	0	4	4	4	6	3	1	0	9	3	4	8	4	7	7	10	15	8	12	11	20	21	0.144111	0.121905	0.10045
ENSG00000278273	0	2	2	0	0	0	0	1	1	2	0	0	0	0	2	0	0	0	1	1	0	0	1	2	0	0	0	0	1	0	2	1	0	0	0	0	0	0	0	0	0	1	0	3	2	0	0	0.0618494	0.0555969
ENSG00000271736	0	0	0	0	0	0	0	0	0	0	0	0	0	0	0	0	0	0	0	5	0	3	2	2	0	0	0	0	0	0	0	0	0	0	0	0	0	0	0	0	0	0	0	0	0	0	0	0	0
ENSG00000233717	0	0	0	0	0	0	0	0	0	0	0	0	0	0	0	0	0	0	1	0	0	0	0	0	0	0	0	0	2	0	0	0	0	0	0	0	0	0	0	0	0	1	0	0	0	0	0	0	0
ENSG00000231551	171	117	132	115	142	130	152	155	140	205	142	187	128	95	179	81	140	177	119	142	141	87	112	72	91	156	125	95	137	159	97	80	252	280	255	277	315	263	221	316	442	370	359	377	463	368	1.65859	1.27995	1.29806
ENSG00000163220	4504	3687	4240	3554	4588	4210	3546	3356	3572	3922	3808	3736	6703	6173	7597	6765	8075	8422	1477	1481	1677	1534	1649	966	894	2540	2424	1686	2493	2458	1432	1489	1198	1407	1183	1340	1551	1133	1054	778	1089	950	807	944	873	969	253.881	234.406	242.313
ENSG00000227295	5	6	2	3	8	10	4	1	3	2	2	6	3	5	2	1	6	2	6	6	15	1	2	3	2	4	6	5	6	9	4	1	2	0	5	0	0	1	0	3	3	2	6	5	0	0	0.0847292	0.114678	0.0343615
ENSG00000163155	57	48	39	49	31	23	34	43	41	33	52	38	30	24	50	43	42	42	60	54	77	54	70	35	52	13	2	7	23	16	13	11	394	477	435	524	524	364	346	98	73	112	75	65	73	93	0.734063	0.697211	0.509217
ENSG00000143603	11	16	14	7	16	16	13	17	11	7	14	23	9	6	20	12	14	10	4	8	4	7	8	12	5	15	15	3	2	8	4	16	15	28	8	20	20	12	14	39	51	73	58	25	53	52	0.0261259	0.0428612	0.0337122
ENSG00000270392	34	40	16	26	32	40	51	36	23	27	37	25	19	22	47	32	19	18	31	25	29	23	30	20	37	38	24	40	39	45	32	29	15	14	22	16	12	13	20	11	25	28	18	13	14	34	0.59392	0.788087	0.283367
ENSG00000160688	1737	1519	1754	1467	1824	1694	1539	1465	1477	1631	1643	1691	922	981	1048	1153	1227	1222	785	814	1053	833	958	506	493	914	780	538	832	795	453	483	1816	2126	1962	2063	2067	1646	1548	1130	1534	1631	1312	1367	1403	1460	13.9594	13.7686	14.2915
ENSG00000233008	14	17	32	29	23	15	35	17	24	24	43	20	39	26	65	29	39	39	67	73	70	49	74	39	33	36	27	18	16	35	18	20	21	16	22	19	15	14	20	366	508	493	418	541	500	554	0.0363783	0.0498229	0.0843033
ENSG00000224520	0	0	0	0	0	0	2	2	2	2	1	0	0	1	0	0	0	0	0	0	0	0	0	0	0	0	0	0	0	0	2	0	0	0	0	0	0	0	0	0	0	0	0	0	0	0	0	0	0
ENSG00000116459	20972	18997	20717	17167	22935	20414	17844	16970	18078	18845	20069	18457	28921	27625	35930	30910	34931	37614	6089	6282	6751	6336	7019	4513	4141	7215	6723	4711	6603	7146	4449	4258	17240	18649	17588	18940	19735	16679	16311	12212	17131	16002	12906	14899	15128	17210	215.86	220.538	216.192
ENSG00000241975	4	14	14	3	15	13	8	9	21	18	11	17	9	4	7	7	6	9	30	42	42	36	33	23	26	35	35	27	32	33	21	28	5	11	4	7	14	8	10	13	17	16	6	19	16	23	0.406274	1.60381	1.44167
ENSG00000271143	2	4	0	2	0	2	0	0	0	0	0	0	0	0	0	0	0	0	0	0	0	0	0	0	0	0	0	0	0	0	0	0	0	0	0	0	0	0	0	0	0	0	0	0	0	0	0.318214	0.717819	0
ENSG00000163344	493	420	506	395	425	447	565	448	505	542	600	505	217	171	265	215	233	246	56	75	92	72	70	36	23	129	98	108	123	119	65	70	487	452	514	551	565	369	429	205	234	216	193	229	215	228	15.8915	15.2698	16.5367
ENSG00000162738	6	0	1	0	2	2	0	0	0	0	0	1	4	6	7	2	7	6	2	2	3	0	0	0	0	4	2	6	14	2	8	0	23	20	12	12	19	16	4	4	2	2	0	2	0	0	0.0361959	0	0.00611628
ENSG00000228217	11	11	3	6	20	8	13	11	25	8	9	20	4	13	11	15	10	11	5	5	6	7	3	7	0	6	4	4	7	3	7	6	9	12	10	8	4	7	12	11	8	8	6	9	13	10	0.84592	0.954101	0.233904
ENSG00000270342	0	0	0	0	0	0	0	0	0	0	0	0	0	0	0	0	0	0	0	0	0	0	0	0	0	0	0	0	0	0	0	0	0	0	0	0	0	0	0	0	0	0	0	0	0	0	0	0	0
ENSG00000143552	24	21	45	11	28	31	36	45	33	58	51	53	6	4	6	2	6	12	28	34	32	17	37	14	25	31	30	15	42	24	28	17	59	60	65	70	66	50	57	65	66	64	66	64	80	98	0.13163	0.129906	0.250228
ENSG00000186364	80	74	59	60	66	64	32	41	50	43	38	41	41	47	44	50	53	78	45	57	39	53	53	29	26	49	59	45	59	56	35	52	66	40	43	56	83	31	50	59	94	97	61	107	87	46	1.55939	1.6269	1.16599
ENSG00000246203	133	154	173	145	165	117	170	163	153	205	219	176	123	113	111	105	137	157	128	118	131	95	137	75	95	165	138	92	149	138	58	63	387	394	458	443	468	420	383	260	349	341	291	354	347	398	1.71486	2.23957	2.26154
ENSG00000175984	41	42	46	45	48	57	57	72	63	77	65	84	19	24	37	20	30	25	133	190	156	159	187	114	87	168	175	112	156	162	90	133	64	64	43	68	61	58	42	54	67	73	60	55	83	63	0.178639	0.206398	0.203203
ENSG00000143127	13	3	4	10	13	12	12	6	14	12	15	11	26	22	14	16	30	24	6	15	20	3	13	3	4	12	9	18	13	12	4	9	80	100	93	77	62	65	61	28	53	30	28	51	44	38	0.0672675	0.0175085	0.0209847
ENSG00000231100	0	0	0	0	0	0	0	0	0	0	0	0	0	0	0	0	0	0	0	0	2	0	0	0	0	0	0	0	0	0	0	0	0	0	0	0	0	0	0	0	0	0	0	0	0	0	0	0	0
ENSG00000203783	0	0	0	0	0	0	0	0	0	0	0	0	0	0	0	0	0	0	0	2	0	0	0	0	0	0	0	0	0	0	0	0	34	23	25	32	23	16	22	0	0	0	0	0	0	0	0	0	0
ENSG00000143549	7986	6753	7550	6193	7898	7417	7278	7023	7506	8198	8323	8053	4352	4116	5197	4752	5240	5631	9403	9525	10536	9556	10205	6670	6287	13426	12447	8535	12376	12574	8077	9076	7286	8151	7614	8157	8501	7450	7095	6660	9424	8613	7082	8197	8830	9804	17.0189	16.2317	16.3128
ENSG00000116824	8379	7579	8796	6874	9110	8833	7498	7017	7189	7580	8121	7551	6195	6252	7940	6597	7812	8387	9076	8993	9796	9012	9511	6406	5786	8906	8248	5834	8302	8729	5049	4887	15607	17012	16358	16790	17846	15100	14638	11573	15446	14926	12004	13576	14111	15794	165.524	168.867	176.17
ENSG00000235887	0	1	0	0	2	1	1	1	0	1	1	0	0	0	0	0	0	1	1	0	1	2	0	0	3	1	2	2	0	1	1	1	0	0	0	0	1	1	0	1	0	0	0	0	0	0	0	0.0892875	0
ENSG00000235795	38	41	55	29	39	38	42	25	40	35	28	37	34	13	55	35	46	43	52	56	47	29	57	19	37	49	55	32	45	47	23	27	24	40	29	23	27	10	26	23	24	34	55	50	37	37	1.82914	2.22593	2.68414
ENSG00000237460	0	0	0	0	0	0	0	0	0	0	0	0	0	0	0	0	0	0	0	0	2	0	0	0	0	0	0	0	0	0	0	0	0	0	0	0	0	2	0	0	0	0	0	0	0	2	0	0	0
ENSG00000236327	4	3	0	4	2	9	4	7	6	2	5	3	0	0	0	0	0	0	13	4	6	9	8	2	3	13	25	8	17	22	11	9	0	2	0	3	1	0	1	4	12	10	4	20	9	5	0.476735	0.403276	0
ENSG00000233337	0	0	3	0	0	2	1	6	0	2	1	0	4	5	2	0	4	2	1	3	0	0	0	0	0	6	6	2	10	9	2	0	4	2	0	11	3	4	2	19	30	37	25	25	19	55	0	0	0.18748
ENSG00000088035	758	646	819	591	823	775	931	860	838	979	1030	956	748	652	879	729	817	926	830	893	849	803	981	633	619	967	902	621	897	992	563	697	803	908	861	879	1008	903	896	1281	1763	1657	1181	1499	1711	1904	4.4619	4.28892	4.88781
ENSG00000223804	192	136	150	125	208	169	149	129	169	193	162	133	136	142	233	184	183	236	314	312	380	324	419	266	294	146	152	174	198	180	122	146	257	254	254	217	257	213	233	200	250	253	232	209	248	291	5.60195	4.47551	4.4372
ENSG00000232671	28	22	18	23	17	18	34	23	28	21	31	31	19	21	25	35	31	20	42	40	57	59	54	26	27	64	30	32	44	53	32	43	9	18	16	14	11	6	10	9	14	12	2	3	9	5	0.914424	0.810359	0.595994
ENSG00000236887	0	0	0	0	0	0	0	0	0	0	0	0	0	0	0	0	0	0	0	0	0	0	0	0	0	0	0	0	0	0	0	0	0	0	0	0	0	0	1	0	0	0	0	0	0	0	0	0	0
ENSG00000163354	0	0	4	3	2	2	8	8	12	3	17	5	4	2	2	3	2	0	4	0	8	9	4	2	2	7	0	4	6	4	0	6	9	6	2	10	5	6	3	0	9	0	3	0	0	3	0	0	0.0426526
ENSG00000230779	0	0	0	0	0	0	0	0	0	0	0	0	0	0	0	0	0	0	0	0	0	2	0	0	0	0	0	0	0	0	0	0	0	0	0	0	0	0	0	0	0	0	0	0	0	0	0	0	0
ENSG00000024526	22	12	16	14	18	21	22	11	22	20	12	14	0	0	0	0	0	0	2	0	0	0	0	0	0	0	0	0	0	0	1	0	154	171	158	112	139	159	127	2	5	7	1	0	3	4	0.120354	0.0740433	0.088744
ENSG00000236480	1	0	1	6	0	0	0	3	0	0	1	0	1	0	0	0	0	0	0	6	0	2	0	0	0	0	0	0	0	0	0	2	1	0	0	0	0	0	3	0	5	0	1	1	0	0	0.0212073	0	0.0215013
ENSG00000225603	0	2	0	0	0	0	0	0	0	0	0	0	0	0	0	1	0	0	3	0	4	0	3	2	1	0	0	0	0	0	0	1	0	0	0	0	0	0	0	0	4	2	0	0	0	2	0	0.0437589	0
ENSG00000173810	0	0	0	0	0	0	0	0	0	0	4	0	0	0	1	0	1	0	5	2	2	7	9	0	3	1	7	10	0	5	4	0	0	0	0	0	0	0	0	0	2	0	1	0	3	2	0	0	0
ENSG00000273136	295	184	266	174	228	236	240	250	203	294	257	264	91	95	137	171	165	165	717	791	773	766	834	556	507	410	324	241	371	379	305	248	243	220	239	297	300	244	261	261	261	304	240	275	283	419	1.40492	0.98835	1.28437
ENSG00000162825	89	85	79	119	99	91	95	120	99	138	120	94	90	66	72	56	56	111	229	148	208	148	182	139	112	183	176	105	178	197	123	118	165	227	240	205	212	152	233	226	240	274	254	242	354	270	0.151334	0.163016	0.136193
ENSG00000235005	19	28	25	21	19	30	13	15	17	7	22	18	9	28	39	12	47	26	0	2	0	3	0	0	4	9	4	12	2	1	1	4	0	0	0	0	0	0	0	0	0	0	2	2	4	0	1.36373	2.26671	1.81925
ENSG00000198019	173	134	129	135	175	142	185	151	192	159	222	168	402	401	542	545	543	560	37	41	41	47	35	23	16	175	148	151	211	207	99	133	63	87	72	67	86	80	97	2	3	2	3	3	1	0	1.31972	1.15293	0.99771
ENSG00000227425	0	0	0	0	0	0	0	0	0	0	0	0	0	0	0	0	0	0	0	0	0	0	0	0	0	0	0	0	0	0	0	0	0	0	0	0	0	0	0	0	2	0	0	0	0	0	0	0	0
ENSG00000233222	0	0	0	0	0	0	0	0	0	0	0	0	0	0	0	0	0	0	0	0	0	0	0	0	0	0	0	0	0	0	0	0	0	0	0	0	0	0	0	0	0	0	0	0	0	0	0	0	0
ENSG00000225279	2	0	0	0	2	2	14	9	14	2	2	16	0	0	0	0	0	0	2	0	0	0	0	0	0	6	4	4	5	3	0	0	0	0	0	0	0	0	0	0	0	0	0	0	0	0	0.0382914	0	0
ENSG00000237976	16	17	34	21	22	25	13	13	23	19	22	17	31	36	49	43	45	45	28	22	43	26	29	10	21	53	50	22	44	42	26	26	20	45	21	26	36	23	33	16	18	13	11	19	11	25	0.836214	1.0021	1.80159
ENSG00000281571	23	29	17	23	21	24	27	12	32	18	37	21	5	3	3	1	5	3	28	50	45	43	42	27	16	70	73	55	70	86	37	48	33	44	27	24	37	24	28	58	72	116	81	84	53	75	0.682786	0.971002	0.511665
ENSG00000224927	0	0	0	0	0	0	3	3	0	8	0	8	0	0	0	0	0	0	0	3	1	4	9	3	0	0	3	0	0	1	0	0	0	0	0	0	0	0	0	0	0	0	0	0	0	0	0	0	0
ENSG00000163352	0	0	0	0	0	0	0	0	0	0	0	0	0	0	0	0	0	0	0	0	0	0	0	0	0	0	0	0	0	0	0	0	0	0	0	0	0	0	0	0	0	0	2	0	0	0	0	0	0
ENSG00000283360	12	14	7	23	22	10	20	15	9	11	7	14	0	3	1	1	2	4	12	16	15	17	22	15	7	10	4	1	6	9	1	5	2	3	2	2	1	3	4	5	16	11	5	17	12	18	0.449114	0.590974	0.265615
ENSG00000270361	5	4	2	0	8	7	4	4	2	0	0	4	0	0	0	0	0	0	0	0	0	0	0	0	0	9	2	1	5	7	6	3	2	3	3	2	5	0	4	0	0	0	0	0	1	0	0.234049	0.211184	0.0949175
ENSG00000225670	0	0	0	0	0	0	0	0	0	0	0	0	0	0	0	0	0	0	0	0	0	0	0	0	0	0	0	0	0	0	0	0	2	0	0	0	3	0	5	0	0	0	0	0	0	0	0	0	0
ENSG00000258465	0	0	0	0	2	0	6	1	5	2	2	0	2	0	0	0	1	0	1	11	1	1	1	7	0	1	7	2	2	3	1	2	0	0	0	2	1	1	0	14	4	5	6	4	3	10	0	0	0
ENSG00000117262	584	477	419	400	692	558	366	669	618	706	604	383	476	540	416	629	640	639	400	444	394	578	540	257	403	586	583	252	559	494	411	448	474	433	455	564	399	564	469	607	605	637	386	605	1119	936	3.39192	3.12476	2.46733
ENSG00000203782	0	0	0	0	0	0	0	0	0	0	0	0	0	0	0	1	0	0	0	0	0	0	0	0	0	0	0	0	0	0	0	0	0	0	0	0	0	0	0	2	6	0	4	2	2	0	0	0	0
ENSG00000227907	0	0	0	0	0	0	0	0	0	0	0	0	0	0	0	0	0	0	0	0	0	2	2	0	0	0	0	0	0	0	0	0	0	0	0	0	0	0	0	4	2	2	4	0	0	0	0	0	0
ENSG00000229002	0	0	0	0	0	0	0	0	0	0	0	0	0	0	0	0	0	0	6	3	1	2	0	0	1	0	0	0	0	0	0	1	0	0	0	0	0	0	0	0	0	0	0	0	0	0	0	0	0
ENSG00000163263	0	3	6	3	7	10	5	8	1	6	3	6	0	0	2	0	0	2	15	17	17	8	31	11	18	5	2	9	10	17	4	8	0	2	1	3	3	1	0	3	3	9	3	8	8	2	0	0.162148	0.291512
ENSG00000274265	294	270	348	248	325	314	336	349	379	354	350	313	317	353	443	386	430	401	291	287	334	276	362	213	249	370	337	239	346	367	236	227	690	824	791	768	877	732	699	187	303	295	230	276	261	317	2.21297	2.29222	2.65574
ENSG00000237076	1	2	4	0	1	0	3	0	4	10	2	1	0	0	0	0	0	0	0	3	1	0	1	0	0	0	0	0	0	0	0	0	5	2	3	2	11	4	3	34	40	43	32	47	55	64	0.0472896	0.106674	0.191781
ENSG00000143624	160	121	178	141	191	168	243	187	204	223	217	229	98	91	118	138	132	157	85	63	101	79	102	44	59	104	121	88	100	127	55	56	253	223	289	253	240	191	217	234	387	394	336	323	318	360	0.493723	0.421128	0.556882
ENSG00000253831	0	0	0	0	0	0	1	6	4	0	8	4	0	0	0	1	0	0	0	1	0	0	0	0	0	9	12	4	12	8	6	10	0	0	0	0	0	0	0	21	19	18	8	26	20	15	0	0	0
ENSG00000287979	89	75	107	90	123	112	93	85	86	109	77	94	92	52	65	58	68	92	116	167	170	145	153	85	72	99	91	84	119	99	74	70	68	55	98	75	86	80	57	86	134	81	63	95	97	115	2.191	2.08247	2.67064
ENSG00000223345	0	0	0	0	0	0	0	0	0	0	2	0	2	0	0	1	0	0	0	0	0	0	0	0	0	2	1	0	0	0	0	2	0	0	0	0	0	0	0	0	2	0	0	0	0	0	0	0	0
ENSG00000163221	96	68	77	67	114	76	88	61	72	76	73	93	44	30	40	46	40	31	214	265	280	188	275	174	180	673	626	393	569	612	404	442	47	56	63	58	79	59	59	167	171	154	126	173	212	153	6.39316	5.10761	5.19894
ENSG00000271567	0	0	0	0	0	0	0	1	0	0	0	0	0	0	0	0	0	0	0	0	0	0	0	0	0	0	0	0	0	1	0	0	0	0	0	0	0	0	0	1	0	0	0	0	0	0	0	0	0
ENSG00000270629	217	186	243	142	288	185	150	246	198	183	255	235	153	132	154	139	170	127	275	287	369	295	329	168	213	303	420	187	327	408	215	182	193	242	211	237	268	234	210	296	363	296	278	288	309	423	0.5848	0.565361	0.663948
ENSG00000261055	2	1	0	0	7	4	1	0	2	4	3	2	3	6	11	5	2	2	4	10	15	14	21	0	5	19	7	11	19	13	16	14	0	0	0	0	0	0	0	0	0	0	0	0	0	0	0.0341967	0.019285	0
ENSG00000231613	7	2	6	6	5	4	3	5	8	8	4	6	4	0	2	5	7	6	19	10	14	15	31	6	3	6	7	1	8	13	7	2	10	8	8	8	4	5	8	7	9	14	2	12	11	12	0.444187	0.143141	0.38601
ENSG00000137947	4793	4181	4533	3979	4862	4412	4059	3828	4298	4273	4389	4328	3774	3765	4638	4067	4652	4833	2946	2709	2984	2819	3248	1883	1837	4222	3821	2690	3676	3933	2487	2566	2973	3269	3066	3260	3298	2873	2745	2273	3077	2886	2348	2731	2701	2966	61.3344	60.345	58.8115
ENSG00000233328	338	281	296	191	335	302	250	228	229	339	280	214	336	269	408	351	375	361	180	195	205	180	224	88	90	257	247	110	231	236	119	186	580	648	583	566	611	413	487	312	371	410	285	337	295	352	25.8085	24.2001	22.9148
ENSG00000231700	0	0	0	0	0	0	0	0	0	2	0	0	0	0	0	0	0	0	0	0	0	0	0	0	0	0	0	0	0	0	0	0	8	3	0	2	1	5	4	4	2	0	2	2	5	3	0	0	0
ENSG00000211451	2	0	5	2	3	1	2	0	0	2	0	0	0	0	0	1	2	0	0	0	4	1	0	2	3	2	2	0	0	5	3	0	3	2	0	0	1	0	2	1	6	2	5	3	14	4	0.0257258	0	0.0652062
ENSG00000236689	6	1	0	2	4	2	0	0	0	0	0	0	0	0	0	0	0	0	0	0	0	0	0	0	0	0	0	0	0	0	0	0	12	8	10	3	4	5	0	4	6	5	4	4	8	11	0.286252	0.0538099	0
ENSG00000233589	0	0	0	0	0	0	0	0	0	0	0	0	0	0	0	0	0	0	0	0	0	0	0	0	0	0	0	0	0	0	1	0	0	0	0	0	0	0	0	0	0	0	0	0	0	0	0	0	0
ENSG00000234604	0	0	0	0	0	0	0	0	0	0	0	0	0	0	0	0	0	0	0	0	0	0	0	0	0	0	0	0	0	0	0	0	3	2	0	2	0	0	2	0	2	5	2	1	1	7	0	0	0
ENSG00000117586	199	156	185	134	224	190	129	140	122	102	170	151	48	65	76	60	95	78	698	661	880	741	911	590	449	945	964	629	936	984	583	574	190	209	242	221	235	179	192	151	224	226	168	187	247	219	1.62187	1.43401	1.52867
ENSG00000239887	0	0	0	0	0	0	1	0	0	2	0	0	0	0	0	0	0	0	0	0	0	0	0	0	0	0	0	0	0	0	0	0	4	0	0	0	0	0	0	0	2	0	0	0	0	0	0	0	0
ENSG00000184330	0	0	0	0	0	0	0	0	0	0	0	0	0	0	0	0	0	0	2	4	6	4	6	4	4	0	0	0	0	0	0	0	0	0	0	0	0	0	0	0	0	0	0	0	0	0	0	0	0
ENSG00000014914	315	334	316	222	297	335	286	281	331	364	295	288	225	256	314	263	307	314	62	57	69	55	58	32	34	115	102	60	94	90	47	59	26	18	21	28	32	22	28	19	16	11	7	18	16	50	2.22531	2.66128	2.26332
ENSG00000243960	0	0	0	2	2	2	7	3	1	0	0	0	2	1	2	4	3	3	2	1	2	0	1	0	0	3	9	3	3	6	4	3	4	2	3	4	6	8	0	4	7	17	20	7	11	25	0	0	0
ENSG00000230946	9	14	14	10	19	15	21	16	8	9	25	14	2	2	2	6	0	0	39	45	49	51	55	32	44	59	64	40	64	78	56	39	6	11	12	22	8	20	14	22	11	24	19	23	19	14	0.296924	0.52095	0.468286
ENSG00000162728	9	3	2	0	3	0	0	2	2	0	2	0	2	4	4	10	2	14	4	2	3	12	8	0	2	9	6	8	6	5	4	6	15	12	9	0	6	7	8	6	14	5	8	10	12	20	0.0691787	0.0260085	0.0155862
ENSG00000229021	1	0	0	2	1	1	8	3	5	0	4	1	5	1	3	3	9	5	4	9	10	4	7	1	7	17	11	4	4	9	8	9	6	5	7	5	1	1	5	5	5	1	4	0	0	0	0.00786049	0	0
ENSG00000223612	29	88	17	11	16	16	22	16	30	23	17	20	16	1	38	32	33	14	15	8	16	12	11	7	8	6	17	18	20	7	13	31	17	27	29	15	19	13	8	12	17	8	12	11	11	5	1.80475	6.17684	1.07262
ENSG00000184371	1004	852	969	737	1038	930	822	771	786	871	829	845	570	569	782	630	781	791	98	133	162	123	99	92	64	87	63	47	67	93	29	60	341	405	346	335	423	277	261	313	457	395	320	413	388	389	6.19091	5.9255	6.05792
ENSG00000233203	1	0	0	0	6	3	1	9	1	5	1	0	3	2	0	0	4	8	0	0	0	0	0	0	0	0	0	4	1	0	4	4	8	0	4	12	5	0	6	4	3	0	0	0	0	4	0.0422206	0	0
ENSG00000232366	0	0	0	0	0	0	0	0	0	0	0	0	0	0	0	0	0	0	0	0	0	0	1	0	0	0	0	0	0	0	0	0	0	0	0	0	0	0	0	0	0	2	0	0	0	0	0	0	0
ENSG00000232499	2	4	4	3	1	1	1	3	2	0	0	1	1	1	1	0	1	0	5	1	2	0	4	1	0	0	4	2	0	0	2	1	0	2	1	0	0	1	1	0	2	0	3	1	1	0	0.062777	0.14161	0.127295
ENSG00000143375	2	6	12	4	8	12	11	17	13	15	18	16	6	2	0	2	0	1	0	0	0	1	0	0	0	0	4	0	4	8	2	0	25	18	20	15	35	28	28	23	27	27	11	16	9	21	0.00976384	0.0330375	0.0593952
ENSG00000271425	67	50	48	49	65	41	85	55	77	80	85	72	36	69	37	38	31	67	222	302	151	117	186	126	51	182	214	76	156	114	77	101	81	93	84	97	131	70	84	128	177	148	125	263	142	130	0.150677	0.126825	0.109444
ENSG00000232265	2	8	4	0	2	9	0	2	1	2	2	4	0	0	0	0	0	0	0	0	1	2	0	0	0	2	10	0	6	4	0	6	10	4	6	6	12	4	2	2	5	4	4	4	2	2	0.0101076	0.0456008	0.0204954
ENSG00000163154	619	567	632	539	772	647	566	462	564	576	618	596	493	416	447	518	504	505	63	81	73	91	74	38	54	118	81	54	111	129	50	76	621	698	655	724	742	544	574	381	550	540	421	490	434	535	17.2651	17.8371	17.872
ENSG00000232995	115	125	132	91	142	103	115	83	87	130	133	140	117	140	159	106	149	144	69	75	93	87	68	36	43	86	82	45	63	71	52	25	40	48	84	71	65	55	73	133	188	195	112	160	209	199	1.02437	1.25584	1.1921
ENSG00000143569	890	801	904	691	1024	868	1041	928	1025	1036	1063	1067	497	557	626	556	663	743	2052	2068	2255	2013	2359	1319	1295	1933	1740	1308	1777	1819	1077	1209	1468	1573	1481	1539	1585	1356	1273	1165	1530	1550	1236	1326	1388	1606	3.83125	3.88909	3.94547
ENSG00000227777	0	0	2	0	0	0	0	0	0	0	0	0	0	0	0	0	0	0	15	10	8	7	7	7	4	16	8	6	20	15	17	11	0	1	0	1	5	4	2	0	0	0	0	0	0	0	0	0	0.105976
ENSG00000287218	1	4	2	1	3	0	6	2	4	2	0	2	1	1	2	1	4	2	9	2	9	0	8	5	10	7	8	4	5	4	2	5	3	3	2	2	0	4	5	0	2	2	5	2	6	0	0.0166574	0.0751507	0.0337767
ENSG00000235700	24	12	14	5	19	26	11	9	12	17	22	13	4	10	3	11	8	15	44	47	40	35	55	25	21	46	41	24	34	55	19	33	20	23	17	23	25	20	15	2	15	19	6	15	10	12	2.50055	1.41017	1.47888
ENSG00000223945	0	0	0	0	0	0	2	2	0	1	4	2	0	0	3	3	6	1	0	0	0	0	0	0	0	0	0	2	0	0	0	0	0	2	4	2	1	3	2	8	4	1	1	1	2	2	0	0	0
ENSG00000230832	51	36	54	32	45	35	35	44	43	49	55	50	40	17	42	50	41	49	17	23	22	28	23	13	10	26	29	24	36	33	18	12	19	30	14	14	22	10	11	50	84	38	43	47	64	91	1.32735	1.05677	1.42491
ENSG00000177173	0	6	2	2	8	6	5	8	5	12	13	4	3	2	1	0	0	2	0	7	8	5	10	4	10	7	16	8	12	16	13	5	8	0	4	11	2	1	2	4	0	3	1	1	2	0	0	0.188916	0.056606
ENSG00000228697	0	0	3	3	0	1	2	1	0	0	0	0	4	2	8	4	6	4	5	2	1	6	4	1	1	4	5	4	0	2	0	3	0	0	0	2	0	0	0	1	9	8	7	7	4	3	0	0	0.0231697
ENSG00000277406	66	77	64	54	74	78	73	59	74	62	64	93	42	30	33	51	34	57	33	40	32	45	44	25	23	59	78	35	47	74	45	51	181	138	166	150	154	137	152	156	189	188	192	196	231	280	1.45411	1.91341	1.42959
ENSG00000231671	0	0	0	0	0	0	0	0	0	0	0	0	0	2	4	2	4	2	0	0	0	0	0	0	0	0	0	0	0	0	0	0	0	0	4	2	4	3	3	2	2	0	0	3	10	1	0	0	0
ENSG00000196184	0	0	0	0	0	0	0	0	0	0	0	0	0	0	0	0	0	0	0	1	0	0	0	0	0	0	0	0	0	0	0	0	0	0	0	0	0	0	0	0	0	0	0	0	0	0	0	0	0
ENSG00000162729	130	115	136	109	160	158	151	135	155	158	187	175	79	60	76	75	124	89	36	59	46	58	57	41	30	88	56	50	76	97	31	52	109	113	99	101	114	83	110	133	191	187	141	163	174	138	1.61992	1.61627	1.71818
ENSG00000143158	3675	3143	3563	3015	3890	3538	3021	3019	3156	3465	3425	3225	3762	3630	4712	4080	4665	5051	1903	2013	2126	1837	2089	1248	1223	2076	1933	1297	1800	1932	1238	1401	2884	3146	2888	3109	3405	2891	2751	2571	3448	3158	2516	2974	2932	3400	44.9954	43.4031	44.2289
ENSG00000237008	0	0	0	0	0	0	1	0	0	0	0	0	0	0	0	0	0	0	0	0	0	1	0	0	0	0	1	0	0	0	0	0	0	0	1	0	2	0	0	0	0	0	0	0	0	0	0	0	0
ENSG00000271092	42	29	36	33	42	22	31	45	46	49	45	36	34	50	60	32	52	47	18	12	20	10	15	17	10	12	10	8	4	22	8	14	20	22	31	39	19	29	24	60	63	70	39	50	79	75	0.691764	0.53873	0.601161
ENSG00000230364	3	6	5	9	5	4	0	3	0	2	4	0	0	0	0	0	1	0	0	0	0	0	0	0	0	5	1	1	2	0	0	0	9	13	7	14	9	16	1	0	0	0	0	1	0	0	0.0739102	0.166724	0.124891
ENSG00000162739	264	296	280	271	312	307	321	288	315	295	352	309	118	149	153	95	127	131	300	326	347	310	301	186	188	421	395	228	379	409	244	263	1095	1354	1147	1277	1434	1076	1170	912	1392	1150	1003	1012	1102	1370	3.1052	3.92683	3.33905
ENSG00000238118	0	0	0	0	0	0	0	0	0	0	3	0	0	0	0	0	0	0	0	0	0	0	0	0	0	0	0	0	0	0	0	0	0	0	0	0	0	0	0	0	1	4	5	4	0	6	0	0	0
ENSG00000276118	0	0	0	0	0	0	0	0	0	0	0	0	0	0	0	0	0	0	0	0	0	0	0	0	0	0	0	0	0	0	0	0	0	0	0	0	0	0	0	0	0	0	0	0	0	0	0	0	0
ENSG00000287607	0	0	0	0	0	0	0	1	0	0	0	0	0	0	0	0	0	0	0	0	0	0	0	0	0	0	0	0	0	0	0	0	0	0	0	0	0	0	0	0	0	0	0	0	0	0	0	0	0
ENSG00000278811	60	45	51	39	48	53	55	46	59	60	76	63	6	11	3	4	4	10	78	62	89	66	73	50	60	140	159	97	99	112	49	59	25	39	34	26	36	29	29	113	181	141	121	135	152	137	0.348297	0.294629	0.300157
ENSG00000117281	45	50	59	27	50	48	27	34	52	44	44	42	65	46	69	52	60	58	574	625	664	573	664	399	413	555	455	343	407	494	278	270	143	145	123	163	167	111	147	94	137	143	122	115	106	129	0.366015	0.458692	0.486539
ENSG00000000460	313	268	245	236	295	253	184	222	232	188	253	230	91	87	144	93	128	151	165	134	165	121	133	85	106	198	226	174	188	202	109	122	534	593	545	566	629	543	528	230	322	333	215	296	249	286	1.69339	1.63535	1.34387
ENSG00000188859	0	0	0	0	0	2	0	0	0	0	0	0	0	0	0	0	0	2	0	0	0	0	0	2	0	0	0	0	0	0	0	0	6	11	10	9	15	9	9	0	0	0	0	0	0	0	0	0	0
ENSG00000264522	156	168	166	129	216	155	160	178	172	167	197	144	92	98	103	78	96	91	70	76	54	59	89	40	54	115	141	117	144	132	107	64	214	224	236	224	265	182	176	283	286	288	194	272	248	327	0.412089	0.500542	0.444584
ENSG00000163564	1895	1671	1867	1601	1924	1883	2001	1966	2066	2325	2380	2045	1001	1043	1319	1149	1354	1329	3792	3940	4344	3768	4517	2751	2798	3445	3365	2019	3108	3223	2108	2043	4630	5220	4903	5242	5569	5098	4775	2980	4133	3872	3169	3783	3798	4443	17.5678	17.4723	17.5482
ENSG00000275075	0	0	0	0	0	0	0	0	0	0	0	0	0	0	0	0	0	0	0	0	0	0	0	0	0	0	0	0	0	0	0	0	0	0	0	0	0	0	0	0	0	0	0	0	1	0	0	0	0
ENSG00000135862	105	103	135	76	109	73	96	88	88	101	106	112	177	160	214	160	190	203	38	19	39	17	39	17	15	36	27	25	27	29	22	18	83	114	112	117	100	82	90	62	78	118	69	89	63	95	0.401536	0.44426	0.523418
ENSG00000232952	10	3	4	9	4	9	8	11	10	19	5	8	6	4	3	5	6	7	10	6	12	7	10	4	11	7	18	6	8	7	15	11	8	16	12	7	2	15	18	6	8	8	16	14	20	15	0.181556	0.0614322	0.0736291
ENSG00000158473	99	98	134	84	139	101	108	120	120	136	119	89	139	112	192	158	140	209	33	24	46	44	50	32	26	67	47	47	50	81	29	49	8	2	2	4	4	2	0	7	21	17	26	14	37	22	0.733558	0.819012	1.00666
ENSG00000227722	1	1	0	2	3	0	0	3	0	0	2	2	0	0	0	0	0	0	3	0	5	2	6	0	0	0	0	0	0	0	0	0	1	0	0	2	4	0	4	0	0	0	0	0	0	0	0.0192484	0.02171	0
ENSG00000285636	0	0	0	0	0	0	0	0	0	1	0	0	0	0	0	0	0	0	1	2	3	0	0	0	0	0	0	0	0	0	4	0	0	0	0	0	0	0	0	0	0	0	0	0	0	0	0	0	0
ENSG00000163191	62192	55722	62907	51148	63279	60354	50033	48072	51742	55339	54849	52759	94375	90528	118128	102477	114709	126960	3581	3601	4046	3535	3974	2464	2438	5593	5387	3669	5393	5376	3269	3639	17496	19230	18079	19772	19906	15708	15442	8928	12082	11090	9415	10675	10306	11498	3095.11	3127.76	3174.09
ENSG00000215853	0	0	0	0	0	0	0	0	0	0	0	0	0	0	0	0	0	0	10	8	16	6	11	0	2	6	3	0	3	12	0	0	0	0	0	0	0	0	0	2	0	0	0	0	0	0	0	0	0
ENSG00000275801	8	14	15	23	25	21	14	7	6	18	13	18	8	7	0	4	8	8	4	2	2	0	1	3	5	0	0	0	0	0	0	0	6	14	3	2	4	6	3	3	6	10	2	5	12	6	0.494054	0.975163	0.939194
ENSG00000143198	7528	6597	7122	6048	7839	7229	6067	5646	6202	6933	6950	6470	8173	7712	10030	8735	10092	10968	628	682	802	722	763	428	438	954	792	541	839	792	583	569	1570	1817	1824	1844	1775	1600	1530	1314	1839	1713	1376	1699	1639	1841	30.1969	29.8465	28.9643
ENSG00000143318	0	2	0	2	0	2	12	6	0	3	2	3	0	0	2	0	0	0	0	0	0	2	0	0	0	11	2	11	6	12	3	0	4	3	5	1	2	2	2	6	10	20	10	7	16	18	0	0.0337777	0
ENSG00000143297	57	62	111	65	71	59	47	55	82	50	64	63	17	34	28	32	37	38	84	98	79	92	108	49	62	107	89	72	106	101	78	62	57	58	57	45	53	76	42	192	270	266	220	240	278	325	0.148303	0.181941	0.292804
ENSG00000162736	1032	861	885	782	1079	933	1171	1116	1307	1296	1351	1376	792	877	1024	921	1060	1207	1835	1743	2058	1862	2099	1339	1153	2021	1790	1255	1649	1931	1034	1079	773	1025	894	912	1003	901	832	1313	1803	1827	1471	1593	1792	1849	8.06883	7.59274	7.01542
ENSG00000117560	229	219	245	150	262	203	207	229	203	208	217	225	50	78	88	59	82	110	274	273	229	234	281	161	139	502	536	412	545	555	335	319	500	520	492	551	559	537	468	211	228	238	184	250	250	245	4.09774	4.41995	4.44482
ENSG00000232188	0	0	0	0	0	0	0	0	0	0	0	0	0	0	0	0	0	0	2	2	0	2	9	2	3	0	0	0	0	0	0	0	0	0	0	0	0	0	0	0	0	0	0	0	0	0	0	0	0
ENSG00000135823	755	744	846	710	930	884	876	835	853	880	980	932	714	608	898	793	834	896	1196	1195	1300	1061	1360	872	842	959	944	659	934	1021	601	587	796	942	864	859	997	771	869	670	873	845	739	881	914	1023	3.76495	4.18456	4.27722
ENSG00000171722	0	0	0	0	0	0	0	0	0	0	0	0	0	0	0	0	0	0	0	0	0	0	0	0	0	0	0	2	0	0	0	0	0	0	0	0	0	0	0	0	0	2	1	0	2	0	0	0	0
ENSG00000143621	7659	6674	7486	6389	8272	7494	6672	6397	6464	6840	7231	6775	6172	5729	7534	6513	7286	7761	3911	3938	4241	3814	4271	2932	2552	5141	4703	3268	4630	4833	3205	3495	9224	10413	9872	10138	10637	9015	8889	6754	9420	9047	7275	8066	8858	9737	109.41	107.532	108.421
ENSG00000241042	11	13	6	8	7	5	4	5	2	5	4	0	8	3	5	7	3	2	0	0	0	0	0	0	0	0	0	0	0	0	0	0	9	2	5	4	2	12	2	0	0	0	0	0	0	0	2.0777	2.76948	1.149
ENSG00000143155	3291	2910	3255	2625	3375	3127	2571	2510	2581	2954	2960	2810	4022	3998	5138	4296	5042	5446	2311	2481	2653	2378	2757	1675	1715	3000	2789	1909	2712	2969	1793	1974	2574	2791	2683	2782	2802	2588	2545	1700	2451	2329	1920	2080	2322	2416	33.3632	33.2735	33.4558
ENSG00000213060	1	0	0	0	0	2	0	2	2	4	0	0	0	0	0	0	0	0	0	0	0	0	0	0	0	2	2	0	0	0	0	0	1	0	3	0	0	3	0	0	4	0	0	2	0	0	0.0763564	0	0
ENSG00000223495	0	0	0	0	0	0	0	0	0	0	0	0	0	0	0	0	0	0	0	0	0	1	0	0	0	0	0	0	0	0	0	0	0	0	0	0	0	0	0	0	0	0	0	0	0	0	0	0	0
ENSG00000241666	97	106	109	108	125	117	61	86	56	89	80	82	40	48	42	57	53	44	535	534	595	556	618	321	292	250	203	150	186	234	153	169	148	165	157	186	217	150	153	358	469	484	349	374	422	433	1.24177	1.53052	1.41473
ENSG00000143156	1196	1074	1130	948	1297	1094	1128	1082	1106	1213	1366	1120	1206	1234	1612	1362	1489	1750	814	918	926	857	934	570	643	927	822	627	911	926	586	563	1198	1275	1305	1280	1486	1150	1243	1017	1493	1270	1008	1277	1279	1522	6.75574	6.84244	6.47142
ENSG00000229612	0	0	0	0	0	0	0	0	0	0	0	0	0	0	0	0	0	0	0	0	0	0	0	0	0	0	0	0	0	0	0	0	0	0	0	2	0	0	0	0	0	0	0	0	0	0	0	0	0
ENSG00000198771	937	878	900	771	963	922	829	821	849	1056	991	948	485	444	529	516	583	607	1606	1712	1846	1560	1779	1180	1103	1641	1590	960	1449	1560	1076	1161	1100	1295	1332	1292	1287	1136	1147	1731	2460	2249	1847	2104	2223	2451	3.70655	3.91732	3.60954
ENSG00000225462	2	2	0	2	2	4	2	1	0	1	2	0	3	6	1	3	0	6	2	0	0	2	1	1	0	0	0	0	0	0	0	0	6	2	2	4	3	0	0	7	4	0	2	13	0	2	0.0603152	0.0680286	0
ENSG00000237756	8	7	3	2	7	2	0	0	6	8	3	5	0	0	0	0	0	0	5	5	2	9	8	6	0	4	9	4	6	3	0	2	1	1	6	0	5	2	4	16	17	20	17	12	12	24	0.550938	0.543721	0.209466
ENSG00000116147	0	0	0	0	0	0	0	0	0	0	0	0	0	0	0	0	0	0	3	10	3	4	8	4	8	2	6	0	0	6	0	4	0	0	0	0	0	0	0	0	0	0	0	0	0	0	0	0	0
ENSG00000213064	2465	2106	2368	1918	2657	2288	2175	1990	2274	2354	2409	2141	2623	2518	3214	2809	3147	3575	2829	2852	3118	2885	2963	2031	1814	4291	3841	2613	3731	3891	2433	2484	2474	2659	2455	2639	2720	2242	2360	1789	2477	2304	1928	2147	2388	2427	7.09784	6.83963	6.91306
ENSG00000203307	0	0	0	0	0	0	0	0	0	0	0	0	0	0	0	0	0	0	0	0	0	0	0	0	0	0	0	1	0	2	0	0	0	0	0	0	0	0	0	0	0	0	0	0	0	0	0	0	0
ENSG00000143179	302	258	346	232	308	311	334	341	339	360	357	389	354	303	422	335	387	420	383	374	422	381	397	242	261	346	304	234	358	362	163	194	484	519	468	435	519	389	419	254	290	335	291	310	312	336	1.39665	1.34576	1.62232
ENSG00000260360	23	34	35	46	30	40	24	26	15	29	42	21	6	22	10	9	23	16	37	33	17	43	57	33	28	10	3	16	18	21	11	7	48	35	13	30	30	24	19	35	24	34	24	12	43	35	0.590988	0.985359	0.911797
ENSG00000274562	0	0	3	0	0	0	0	0	0	0	0	0	0	0	0	0	0	0	0	0	0	0	0	0	0	0	0	0	0	0	0	0	0	0	0	0	0	0	0	0	8	0	0	2	0	0	0	0	0.177008
ENSG00000143315	725	616	735	577	806	737	602	552	708	652	642	666	308	327	378	345	418	437	596	594	688	526	631	414	400	521	426	314	430	482	299	365	763	940	795	855	960	806	791	800	1242	1229	940	1049	1073	1280	3.32717	3.18847	3.41982
ENSG00000227094	5	0	2	2	0	4	0	0	0	0	0	0	0	0	0	0	0	0	0	0	0	0	0	0	0	0	0	0	0	0	2	0	5	4	4	5	15	9	6	0	0	0	0	0	0	0	0.312367	0	0.126679
ENSG00000286966	6	11	5	9	20	5	23	25	28	25	23	19	3	2	4	1	1	3	0	0	0	0	0	0	0	0	0	2	0	0	0	0	0	0	0	0	0	0	0	0	0	0	0	0	0	0	0.226658	0.468681	0.1915
ENSG00000116199	466	404	425	330	515	394	440	414	416	478	487	487	252	248	382	335	276	324	280	303	344	310	382	221	189	423	417	247	364	378	260	267	390	437	386	436	431	378	350	347	412	421	304	403	418	474	2.48945	2.43424	2.3019
ENSG00000143185	73	75	99	39	61	108	68	76	112	70	112	55	68	34	40	60	46	74	173	221	222	207	239	136	117	251	266	174	227	261	123	140	152	178	151	168	175	133	126	137	163	165	155	145	165	175	4.19539	4.86156	5.76852
ENSG00000235145	3	3	2	8	9	0	19	4	6	2	4	11	10	8	8	8	3	12	20	27	16	25	16	15	19	16	18	5	10	7	1	9	6	4	11	10	6	2	9	2	9	7	4	0	10	4	0.118022	0.133116	0.0797724
ENSG00000007933	0	0	0	0	0	0	4	2	2	2	4	0	0	0	0	0	0	0	0	0	4	0	0	0	0	0	2	6	9	5	2	2	0	0	0	0	0	0	0	7	4	0	4	5	3	0	0	0	0
ENSG00000116260	553	523	557	414	516	524	637	578	554	617	640	566	528	492	713	572	583	695	175	194	158	159	167	100	108	218	287	152	230	234	124	189	228	261	243	299	273	231	191	161	174	183	122	168	180	139	1.92553	2.05396	1.96635
ENSG00000117475	1630	1438	1693	1444	1757	1601	1404	1215	1360	1484	1535	1431	1408	1509	1892	1520	1754	1943	1157	1155	1180	1177	1316	779	751	1706	1504	1100	1571	1474	1024	1067	1368	1460	1248	1307	1470	1242	1232	1093	1315	1340	1084	1245	1223	1424	13.7819	13.7134	14.5131
ENSG00000272931	7	0	10	0	10	2	10	2	3	6	6	3	2	0	4	0	2	2	26	14	19	16	18	11	21	5	17	3	12	2	6	9	22	15	20	12	8	19	17	22	30	21	14	21	25	26	0.325311	0	0.471173
ENSG00000143340	0	0	0	0	0	0	1	0	0	2	0	2	0	0	0	0	0	0	0	0	0	0	0	0	1	1	0	0	0	0	0	0	0	0	0	0	0	0	0	0	2	0	0	0	0	0	0	0	0
ENSG00000143190	679	693	668	630	846	725	913	862	896	1039	1011	966	469	450	549	493	539	610	2800	2831	3168	2564	3113	1997	1889	2788	2650	1855	2601	2670	1630	1626	1270	1395	1364	1430	1454	1211	1265	1508	2137	2082	1682	1832	1968	2285	1.36803	1.57479	1.36452
ENSG00000225475	0	0	0	0	0	0	0	0	0	0	0	2	0	0	0	0	0	0	0	0	0	2	0	0	0	0	2	0	0	0	0	0	0	0	1	0	3	0	0	0	2	0	0	0	0	0	0	0	0
ENSG00000213062	22	37	27	14	31	31	28	29	31	16	21	25	21	14	27	42	25	33	51	43	37	35	59	15	24	35	44	27	45	37	25	9	6	21	8	7	13	5	17	55	87	49	43	47	58	65	0.0503702	0.0955472	0.062675
ENSG00000234998	0	3	7	0	5	5	0	1	1	0	0	0	3	8	8	6	10	10	2	0	2	1	2	0	2	33	43	28	51	35	18	11	13	10	7	10	8	16	13	1	0	3	0	4	0	0	0	0.2381	0.499403
ENSG00000232678	0	0	0	0	0	0	2	0	4	2	2	0	0	0	0	0	0	0	1	0	0	0	0	0	0	0	0	0	0	0	0	0	0	0	0	0	0	0	0	0	0	0	0	0	0	0	0	0	0
ENSG00000224698	0	0	0	0	0	0	0	0	0	0	0	0	0	0	0	0	0	0	0	0	0	0	0	0	0	0	1	0	0	0	0	0	0	0	0	0	0	0	2	0	0	0	0	2	0	0	0	0	0
ENSG00000159348	2092	1820	2074	1801	2096	2022	1868	1816	1873	1966	2033	2029	952	914	1051	976	1042	1119	597	579	670	571	648	467	385	751	731	514	711	736	502	527	555	627	561	644	595	558	500	730	1034	1042	846	993	917	1169	15.032	14.75	15.1093
ENSG00000287697	153	152	161	139	184	153	208	147	193	232	253	226	188	147	170	241	208	203	516	489	537	511	501	334	324	423	358	239	299	383	234	197	217	242	217	224	231	251	214	365	458	472	323	400	476	498	3.88805	4.35661	4.14807
ENSG00000075945	876	741	849	632	957	839	977	989	886	960	1063	889	556	450	731	584	629	756	1143	1218	1326	1295	1294	830	778	1297	1177	903	1218	1358	793	878	1099	1064	1114	1060	1143	1050	1030	1247	1770	1622	1274	1593	1461	1733	5.68375	5.42268	5.58494
ENSG00000162779	9	11	11	9	6	1	19	12	23	22	30	20	4	8	4	4	10	8	5	4	9	9	8	2	7	15	13	10	9	12	12	10	6	6	9	6	4	3	3	13	29	14	24	22	29	25	0.04774	0.0658109	0.0591578
ENSG00000273160	10	16	15	12	22	11	18	2	12	18	8	7	10	6	0	2	1	1	34	37	55	28	55	17	18	22	50	32	46	27	15	13	20	11	14	19	29	24	33	14	21	26	16	18	19	17	1.06597	1.92366	1.62112
ENSG00000122432	71	68	93	74	86	86	101	100	117	147	124	103	55	57	76	73	78	76	256	284	319	264	263	213	172	193	216	136	244	215	187	136	73	94	88	96	110	83	88	248	334	291	198	279	325	322	0.535797	0.578783	0.711549
ENSG00000234810	0	0	0	0	0	0	0	0	0	0	0	0	0	0	0	0	0	2	108	96	159	98	111	51	68	128	139	92	146	135	96	69	0	0	0	0	0	0	0	5	2	2	1	4	5	6	0	0	0
ENSG00000232750	1	0	0	0	0	0	0	0	0	0	0	0	1	2	0	0	6	1	0	3	0	0	0	0	1	2	2	0	2	4	1	1	0	0	0	1	0	0	0	1	2	1	0	2	4	1	0.0938918	0	0
ENSG00000224468	3	0	3	0	0	3	1	0	0	7	1	1	4	0	0	2	6	3	0	0	0	0	0	0	0	0	0	0	0	0	0	0	2	0	0	3	0	0	0	0	2	4	0	2	2	0	0.202289	0	0.205093
ENSG00000224600	0	0	0	0	0	0	0	0	0	0	0	0	0	0	0	1	2	0	0	0	0	0	0	0	0	0	0	0	0	0	0	0	0	0	0	0	0	0	0	0	0	0	0	0	0	0	0	0	0
ENSG00000272419	58	78	58	60	47	35	77	68	62	54	82	79	52	36	77	29	69	42	65	61	78	73	73	45	65	71	75	54	74	82	37	33	181	193	136	143	134	166	164	139	179	214	141	176	169	177	0.309334	0.469202	0.313623
ENSG00000229785	2	2	2	5	10	1	3	2	0	2	3	5	0	2	0	0	1	0	0	1	1	0	1	0	0	0	0	1	0	1	1	2	2	0	1	3	1	1	2	4	3	3	0	5	2	1	0.0685022	0.0772626	0.0694519
ENSG00000092607	6	0	6	4	2	3	10	9	8	8	16	23	12	23	16	14	20	8	147	155	220	160	160	100	111	247	289	191	281	299	110	170	2	4	4	6	2	0	0	0	0	0	0	0	0	0	0.0446116	0	0.04523
ENSG00000234425	5	5	0	2	6	1	12	7	3	11	18	14	3	4	4	4	5	1	24	36	26	31	32	27	26	39	26	26	26	23	22	16	9	7	14	10	9	11	8	14	18	14	6	20	14	11	0.254321	0.286845	0
ENSG00000230704	0	0	0	0	0	0	0	0	0	0	0	0	0	0	0	0	0	0	0	0	0	0	0	0	0	0	0	0	4	0	0	0	0	0	0	0	0	0	0	0	0	0	0	0	0	0	0	0	0
ENSG00000227741	25	9	13	6	18	11	18	18	15	19	23	13	0	6	5	3	4	12	23	33	20	28	22	12	19	23	18	17	44	27	16	19	19	17	16	27	25	21	7	7	22	14	10	5	8	8	0.511704	0.207772	0.269775
ENSG00000237049	2	4	0	0	1	2	0	2	0	0	3	0	0	3	5	8	0	3	5	3	10	3	6	2	2	4	7	1	4	4	1	0	0	0	0	0	0	0	0	0	2	0	2	2	4	0	0.182479	0.41163	0
ENSG00000269887	0	4	0	0	0	0	2	2	0	4	0	0	0	0	0	0	0	0	8	18	0	10	10	4	4	16	18	8	5	11	6	7	0	0	0	0	0	0	0	14	10	12	8	7	5	8	0	0.2038	0
ENSG00000235082	81	88	83	72	109	74	111	70	90	84	117	83	78	64	96	74	118	120	140	188	227	180	203	147	118	222	238	129	184	197	131	133	64	87	54	101	72	88	97	127	197	174	117	148	155	206	8.60592	10.5453	8.94067
ENSG00000232751	0	0	0	0	0	0	0	0	0	0	0	0	0	0	0	0	0	0	0	0	0	0	0	0	0	0	0	0	0	0	0	0	0	0	0	0	0	0	0	0	0	0	0	0	0	0	0	0	0
ENSG00000254913	1	0	1	1	2	2	0	0	0	0	0	0	1	0	0	1	0	0	0	0	0	0	0	0	0	0	0	1	0	0	0	0	0	2	0	0	4	0	1	0	0	0	0	0	0	0	0.0795536	0	0.0806565
ENSG00000287831	0	0	0	0	0	0	0	0	0	0	0	0	0	0	0	0	0	0	0	0	0	0	0	0	0	0	0	0	0	0	0	0	0	0	0	0	0	0	0	0	0	0	0	0	0	0	0	0	0
ENSG00000236364	10	17	17	12	21	22	46	37	23	48	30	56	17	13	16	13	16	26	62	91	75	66	94	66	54	63	69	56	78	87	57	58	28	32	23	30	34	37	27	18	19	19	24	43	15	26	0.109413	0.209789	0.188581
ENSG00000117091	3323	3050	3291	2800	3593	3329	2727	2662	2825	3055	3067	2875	2306	2242	2974	2626	2839	3012	1453	1526	1646	1548	1697	1023	928	2596	2391	1541	2425	2458	1516	1452	2492	2785	2762	2778	2878	2458	2303	1172	1687	1651	1313	1564	1428	1703	32.9837	34.1455	33.1189
ENSG00000235378	0	2	0	0	0	0	2	0	0	0	0	0	0	0	0	0	0	0	1	0	2	2	0	0	0	2	0	0	0	0	2	0	2	0	0	3	0	0	2	0	1	0	0	2	0	2	0	0.560451	0
ENSG00000163209	0	0	0	0	0	0	0	0	0	0	0	0	0	0	0	0	0	0	0	0	0	2	0	0	0	0	0	0	0	0	0	0	0	0	0	0	0	0	0	0	0	0	0	0	0	0	0	0	0
ENSG00000229588	0	0	0	0	0	0	0	0	0	0	0	0	0	0	0	0	0	0	0	0	0	0	0	0	0	0	0	0	0	0	0	0	0	0	0	0	0	0	0	0	0	0	0	0	1	0	0	0	0
ENSG00000122218	3542	3192	3698	3041	3873	3593	4175	4045	4379	4356	4579	4379	1841	1825	2293	2050	2360	2472	4058	4137	4587	4107	4652	2805	2795	6215	5769	3943	5402	5758	3563	3803	2625	2737	2578	2640	2903	2410	2438	2861	4107	3956	3217	3412	3576	4046	14.8806	15.1252	15.7514
ENSG00000143171	0	0	0	0	0	0	0	0	0	0	0	0	0	0	0	0	0	0	0	0	0	0	0	0	0	0	0	2	0	0	0	0	0	0	0	0	0	2	0	0	0	0	0	0	0	0	0	0	0
ENSG00000272033	89	57	64	54	46	89	58	54	80	80	88	65	12	19	24	32	30	22	488	489	615	480	542	321	288	667	591	339	617	567	358	285	19	30	33	39	32	26	34	141	204	202	156	207	206	262	1.51854	1.09692	1.10712
ENSG00000224718	0	0	0	0	0	0	0	0	0	0	0	0	0	0	0	0	0	0	0	0	0	2	0	0	0	0	0	0	0	0	0	0	0	0	0	0	0	0	0	0	0	0	0	0	0	0	0	0	0
ENSG00000047410	1899	1622	1768	1432	1920	1770	1669	1693	1850	1913	2024	1795	1422	1446	1890	1536	1614	1804	1895	1968	2175	2047	2239	1539	1417	1733	1576	1165	1485	1779	1066	1014	2873	3299	2948	3386	3298	2883	2828	3914	5295	5087	4007	4691	5148	5583	4.96643	4.78448	4.68793
ENSG00000231992	0	0	0	0	0	0	6	0	5	0	1	4	0	0	0	0	0	0	7	2	4	1	4	4	3	16	21	12	17	16	10	8	0	0	0	0	1	0	0	3	6	3	5	4	4	3	0	0	0
ENSG00000018625	0	0	0	0	0	0	0	0	0	0	0	0	0	0	0	0	0	0	8	22	6	10	17	13	8	2	0	0	4	3	3	0	0	0	0	2	0	0	0	0	0	0	0	0	0	0	0	0	0
ENSG00000171806	705	575	701	564	702	612	577	569	586	604	644	530	907	911	1162	927	1193	1111	498	473	598	520	551	317	362	547	491	319	413	485	365	304	720	825	757	784	910	797	774	1103	1414	1307	1021	1318	1318	1509	14.4575	13.2996	14.5748
ENSG00000224261	10	23	27	36	16	35	47	48	51	61	54	45	10	13	22	15	16	23	27	27	13	24	27	15	9	14	33	16	15	9	7	2	51	31	38	48	39	18	19	32	32	35	36	31	34	33	0.364546	0.945682	0.99792
ENSG00000287919	3	8	14	0	4	5	0	0	0	0	2	0	0	0	0	0	0	0	7	6	8	8	2	4	0	10	7	0	6	13	4	5	0	10	12	7	2	2	2	0	0	0	0	0	0	0	0.0355452	0.106909	0.168177
ENSG00000229914	0	0	0	0	0	0	0	0	0	0	0	0	0	0	0	0	0	0	0	0	0	0	0	0	0	0	0	0	0	0	0	0	4	2	2	0	2	4	5	0	1	4	0	2	2	6	0	0	0
ENSG00000213088	4	0	0	9	5	4	0	0	0	0	0	0	0	0	0	0	0	0	0	0	0	0	0	0	0	4	3	0	0	0	0	0	18	20	22	16	9	9	10	0	0	0	0	0	0	0	0.0613462	0	0
ENSG00000198574	168	169	142	118	152	183	195	137	179	183	242	190	40	40	67	65	73	69	1992	1987	2345	2044	2267	1364	1338	1560	1523	1069	1492	1503	893	965	710	820	920	945	864	726	711	911	1203	1206	926	1079	1063	1395	1.94139	2.2027	1.66369
ENSG00000203739	346	292	289	269	311	279	252	266	241	284	351	361	135	107	179	159	133	128	447	440	513	424	497	259	270	570	513	325	473	498	298	389	292	298	312	350	336	261	230	670	985	979	705	828	880	916	2.32966	2.2175	1.97285
ENSG00000198358	0	0	0	0	0	0	0	0	0	0	0	0	0	0	0	0	0	0	0	1	0	0	0	0	0	0	0	0	1	0	0	0	0	0	0	0	0	0	0	0	0	0	0	0	0	2	0	0	0
ENSG00000229407	0	0	0	0	0	0	0	0	0	0	0	0	0	0	2	0	0	0	0	0	0	0	0	0	0	0	0	0	0	0	0	0	0	0	0	0	0	0	0	0	0	0	0	0	0	0	0	0	0
ENSG00000235575	17	13	8	6	12	14	24	22	21	14	19	19	11	15	13	14	13	8	33	33	17	25	38	21	10	48	39	19	39	46	38	23	14	5	15	17	7	5	24	28	31	18	21	17	28	32	1.49206	1.2869	0.711882
ENSG00000134216	0	0	0	0	0	0	0	0	0	0	0	0	0	0	0	0	0	0	1	0	0	0	0	0	0	0	0	0	0	4	0	0	0	0	0	0	0	0	0	0	0	0	0	0	0	0	0	0	0
ENSG00000234761	0	4	2	2	4	0	0	0	0	0	0	0	0	0	0	0	0	0	0	0	2	0	0	0	0	0	0	0	0	0	0	0	0	0	0	0	0	0	0	0	0	0	0	0	0	0	0	0.117609	0.0528596
ENSG00000254154	0	0	0	0	0	0	4	2	0	0	1	7	0	0	0	0	0	0	0	0	1	0	0	0	0	0	0	0	0	0	0	0	0	0	0	0	0	0	0	0	0	0	0	2	0	0	0	0	0
ENSG00000162694	169	141	148	135	168	169	93	153	118	126	133	116	135	130	180	106	177	203	70	86	109	109	89	65	82	81	56	61	60	88	64	53	249	271	255	230	232	274	215	76	81	91	54	71	94	112	1.35952	1.27934	1.2071
ENSG00000132716	534	494	536	507	601	537	623	685	716	747	730	738	362	369	413	404	418	490	1116	955	1148	961	1088	609	713	1348	1220	893	1189	1255	786	844	781	798	794	764	848	653	704	962	1439	1301	1050	1171	1275	1363	2.26792	2.36635	2.30798
ENSG00000288574	0	0	0	0	0	0	0	0	0	0	0	0	0	0	0	0	0	0	1	0	0	0	0	0	0	0	0	0	0	0	0	0	0	0	0	0	0	0	0	0	0	0	0	0	0	0	0	0	0
ENSG00000183853	0	0	0	0	0	0	0	0	0	0	0	0	0	0	0	0	0	0	0	0	2	0	0	0	0	0	0	0	0	0	0	0	0	0	0	0	0	0	0	0	0	0	2	0	0	0	0	0	0
ENSG00000143401	27549	24097	26860	22280	29573	25902	21785	20689	22124	23391	24590	22572	31885	32460	40790	35487	38758	41681	26536	27269	30088	26870	30175	20489	19350	25592	23553	16105	23357	24632	15282	13917	48260	54990	51419	51517	55536	52869	51067	40839	57750	53234	41382	48643	54485	61492	246.824	243.505	243.987
ENSG00000215835	21	37	25	27	34	22	32	29	27	25	31	38	26	29	29	17	21	24	63	63	56	59	51	17	33	52	38	53	58	46	20	15	45	49	46	41	28	30	27	41	34	37	21	33	24	42	0.344476	0.684553	0.415776
ENSG00000118197	1372	1161	1296	1177	1417	1249	1145	1035	1152	1311	1242	1138	736	709	866	707	835	942	883	818	954	740	1018	612	573	941	849	670	858	891	635	650	776	925	738	859	870	790	810	719	1004	935	770	889	979	1079	10.0485	9.59057	9.62348
ENSG00000135842	947	844	984	785	989	915	814	781	890	963	972	948	724	769	1008	851	922	998	1412	1443	1439	1293	1494	1015	880	1679	1688	1060	1513	1699	991	1156	587	581	576	638	576	541	553	443	706	600	500	584	604	600	3.6719	3.69104	3.86826
ENSG00000227621	2	4	4	4	2	2	0	2	2	6	4	4	2	4	1	2	2	10	0	0	0	2	0	0	4	0	2	2	0	0	0	0	2	2	4	0	4	4	2	4	2	2	2	1	2	4	0.0798486	0.18012	0.161911
ENSG00000229258	0	0	0	0	0	0	1	0	4	1	0	0	0	0	0	0	0	0	0	0	0	0	0	0	0	4	1	3	0	1	0	3	0	0	0	0	0	0	0	0	2	1	1	0	0	0	0	0	0
ENSG00000227776	2	0	0	0	1	2	8	8	6	4	15	6	0	0	0	2	2	2	8	5	8	7	8	11	5	6	2	0	4	0	2	3	0	0	0	0	0	2	0	10	14	5	20	19	4	8	0.0690145	0	0
ENSG00000198734	75	39	65	48	67	47	59	80	64	75	44	76	27	22	45	27	32	52	317	340	350	282	375	166	220	301	300	181	289	284	189	150	228	252	216	242	266	223	205	93	158	127	115	120	131	167	0.258445	0.151578	0.227091
ENSG00000242193	284	298	290	231	306	287	151	159	161	207	195	200	316	220	310	282	355	397	6	29	17	7	13	6	12	26	22	23	18	17	14	13	21	26	10	12	20	21	5	0	0	0	0	0	0	1	1.66809	1.97416	1.72695
ENSG00000077152	204	191	202	172	192	187	152	108	158	143	173	171	126	107	129	113	154	164	16	33	48	19	30	14	16	72	71	42	76	80	41	47	697	795	635	735	847	696	623	155	248	208	181	207	137	218	3.98847	4.21186	4.00412
ENSG00000241318	0	0	0	0	0	0	0	0	0	0	0	0	0	0	0	0	0	0	0	0	0	0	0	0	0	0	0	0	0	0	0	0	0	0	0	0	0	0	0	0	0	0	0	0	0	0	0	0	0
ENSG00000143164	756	673	825	626	784	756	772	736	712	779	817	819	443	438	549	521	483	578	423	425	525	477	516	359	286	547	468	346	498	554	305	360	943	1063	890	989	1107	956	1023	870	1115	1136	906	1069	1142	1335	3.87216	3.88787	4.28416
ENSG00000255148	2	0	6	0	0	0	0	0	6	4	0	2	0	0	0	0	0	0	2	0	0	0	0	0	0	0	0	0	0	0	0	0	2	2	3	3	2	11	2	0	0	2	0	0	2	0	0.116602	0	0.354656
ENSG00000133048	168867	149306	165909	136393	179516	164030	154108	146941	155611	163033	170415	159969	32195	30042	38422	33538	38466	40707	22	14	22	22	29	18	12	67	53	38	79	59	32	36	14514	15968	14643	16133	16685	13596	12977	3358	4021	3956	3323	3601	3563	4194	1621.82	1617.34	1615.51
ENSG00000228238	10	2	0	0	2	3	0	0	0	0	0	0	0	0	0	0	0	0	0	0	0	0	0	0	0	0	0	0	0	6	0	2	0	0	0	0	0	0	0	0	0	0	0	0	0	0	0.316344	0.07136	0
ENSG00000232393	0	0	0	0	0	0	2	0	0	0	0	0	0	0	0	0	0	0	0	0	0	0	0	0	0	0	0	0	0	0	0	0	0	0	0	0	0	0	0	0	0	0	0	0	0	0	0	0	0
ENSG00000121454	6	8	6	4	16	8	20	16	12	12	30	19	8	3	6	2	10	9	56	97	90	55	86	69	70	85	67	65	107	99	55	57	29	40	18	24	32	34	22	74	69	96	71	85	108	80	0.0318476	0.0478939	0.0322891
ENSG00000126070	2135	1851	2060	1845	2166	1987	2236	2235	2399	2649	2602	2427	1886	2034	2718	2324	2600	2543	2711	2557	2906	2809	3070	1984	1736	2721	2335	1681	2298	2669	1580	1638	3162	3660	3496	3397	3763	3515	3268	2990	3965	3644	2904	3516	3645	4015	3.25996	3.18776	3.18905
ENSG00000275140	0	0	0	0	0	0	1	0	0	0	0	0	0	0	0	0	0	0	0	0	0	1	0	0	0	2	0	0	2	0	1	1	2	1	4	3	10	0	10	3	2	2	4	0	0	3	0	0	0
ENSG00000163157	24	22	17	29	18	32	18	22	25	14	30	35	9	15	10	16	16	17	26	32	22	36	40	39	17	49	41	47	61	43	39	34	15	35	18	32	20	18	21	85	101	112	93	104	112	90	0.420603	0.434859	0.302057
ENSG00000117036	2713	2477	2751	2208	2836	2680	3578	3342	3455	3840	3822	3644	1296	1240	1557	1413	1628	1593	4186	4195	4794	4261	4911	3025	2934	5232	4699	3276	4602	4982	3080	3184	1608	1694	1590	1672	1727	1529	1559	2256	2950	2704	2240	2514	2579	2973	13.0649	13.4539	13.4316
ENSG00000058085	2	6	2	0	2	2	0	0	0	1	0	0	0	3	2	4	2	10	1	7	5	4	0	2	3	1	4	1	0	0	0	0	0	0	0	0	0	0	0	10	6	6	4	6	6	8	0.00954173	0.0322859	0.00967402
ENSG00000188460	3	2	2	2	3	1	2	4	3	0	5	2	0	0	1	3	1	0	2	0	3	3	7	5	4	7	5	0	3	11	5	9	3	6	2	0	1	3	5	0	6	3	0	3	4	4	0.0860536	0.0647057	0.0581644
ENSG00000260088	1	7	3	5	12	6	4	2	1	10	0	5	15	19	11	10	17	18	5	7	14	9	4	6	8	0	0	0	0	2	0	0	0	4	3	4	0	5	0	0	0	1	0	0	2	0	0.0438842	0.346474	0.133478
ENSG00000287978	159	164	170	100	202	173	121	134	123	163	174	135	95	109	125	110	164	137	415	473	460	438	492	353	328	616	515	350	542	542	377	388	300	392	268	353	349	263	269	893	1270	1326	937	1140	1342	1238	7.68788	8.94372	8.3337
ENSG00000183155	2102	1861	2157	1687	2289	2071	1803	1778	1986	2104	2107	1893	1793	1739	2188	1895	2221	2199	738	759	834	716	838	540	484	884	817	578	843	828	570	601	2331	2629	2547	2628	2783	2396	2271	946	1186	1257	1034	1172	1211	1337	21.7672	21.7361	22.6465
ENSG00000117533	2484	2253	2396	1960	2536	2155	2048	1982	2062	2349	2347	2119	2156	2172	2793	2278	2567	2718	451	505	496	448	475	339	308	606	476	373	447	490	348	390	912	992	1076	1015	1081	1013	935	895	1276	1167	885	1079	1022	1222	16.0911	16.4611	15.7362
ENSG00000116815	10473	9391	10438	8416	10821	10159	8576	8116	8711	8945	9580	9099	10698	10276	13064	11213	12650	13789	1985	2035	2137	1879	2202	1353	1300	2984	2684	1739	2525	2659	1622	1838	5642	6160	5783	6019	6479	5811	5446	3029	4135	3980	3284	3593	3749	4274	189.61	191.764	191.597
ENSG00000225487	0	0	2	0	0	0	0	0	0	2	0	0	0	0	0	0	0	0	0	0	0	0	2	0	0	0	0	0	0	2	2	0	0	0	4	0	2	0	0	0	0	0	0	0	0	0	0	0	0.209914
ENSG00000232917	0	0	4	0	0	1	3	6	2	3	6	4	2	3	0	3	0	0	0	0	0	2	0	0	0	1	2	0	0	4	0	0	5	0	4	1	1	1	1	1	1	3	1	0	1	1	0	0	0.450124
ENSG00000233057	15	10	11	11	6	8	20	14	20	18	23	18	13	6	10	4	2	18	29	37	31	36	46	33	12	6	6	20	5	12	4	11	43	84	55	55	56	45	33	24	14	22	19	10	32	23	0.352094	0.264748	0.261782
ENSG00000237131	0	0	0	0	0	0	0	0	0	0	2	0	0	0	0	0	0	0	0	0	0	0	0	0	0	1	0	0	0	0	2	1	0	0	0	0	0	0	0	0	0	0	0	0	0	0	0	0	0
ENSG00000116741	4541	4057	4547	3834	4880	4346	3793	3808	4234	4390	4512	4135	3379	3201	3957	3517	3924	4202	4317	4148	4683	4271	4607	2924	2861	4616	4350	2917	4179	4316	2814	3302	4386	4767	4696	4788	4935	4459	3970	677	960	914	725	829	843	924	70.2436	70.7824	71.3116
ENSG00000122482	1327	1035	1269	988	1299	1182	1215	1099	1182	1218	1443	1397	1139	1092	1305	1186	1340	1422	1729	1697	2096	1808	2112	1349	1336	2012	1713	1177	1523	1639	1160	1239	1893	2179	2017	2114	2096	2005	1813	1227	1767	1802	1352	1506	1748	1850	5.63657	4.95849	5.46494
ENSG00000215861	644	678	599	612	659	659	648	611	642	677	729	612	600	796	869	577	602	689	80	50	62	92	47	36	35	86	82	58	159	94	67	65	676	539	646	779	732	574	485	58	88	83	79	77	179	90	20.1359	23.91	18.9886
ENSG00000123843	0	0	2	4	0	0	14	19	17	8	14	16	0	2	2	4	0	1	22	26	29	28	22	13	25	69	46	41	59	57	29	14	31	29	26	25	29	27	17	41	41	52	40	42	45	53	0	0	0.0204602
ENSG00000143167	15	13	15	10	18	16	23	43	24	30	35	35	1	7	14	11	10	6	69	77	70	74	76	36	42	67	70	58	70	93	56	38	15	28	42	13	31	29	26	106	141	139	122	129	149	130	0.164454	0.160754	0.166734
ENSG00000143184	43	42	60	38	41	42	70	59	52	64	64	48	5	20	34	23	14	34	136	157	146	127	138	85	71	152	155	94	149	153	92	75	174	217	154	174	185	104	213	114	147	121	106	149	110	147	1.1319	1.24697	1.6013
ENSG00000231966	0	0	0	0	4	1	0	0	0	0	0	0	0	0	0	0	0	0	0	0	0	0	0	0	0	0	0	2	0	0	0	0	0	0	0	0	0	0	0	0	1	0	0	0	0	0	0	0	0
ENSG00000203685	2	2	2	3	1	6	0	0	1	0	0	0	0	0	0	0	0	0	0	2	2	0	2	6	4	0	0	0	0	0	0	0	5	4	4	7	2	6	2	0	0	0	0	0	0	0	0.00823633	0.00928963	0.00835052
ENSG00000131788	263	184	252	135	228	199	303	342	338	363	351	361	73	57	54	60	61	82	463	496	516	462	530	317	287	551	496	397	520	528	351	305	203	264	272	299	278	220	250	298	390	388	290	312	373	394	1.76749	1.39471	1.71705
ENSG00000176320	0	0	0	0	0	0	0	0	0	0	0	0	0	0	0	0	0	0	0	3	0	0	0	0	0	4	2	0	0	1	0	0	15	19	12	18	11	10	6	0	0	0	4	0	12	2	0	0	0
ENSG00000235215	3	7	0	3	1	2	3	3	4	10	7	2	0	0	3	5	1	0	0	0	0	0	0	0	0	0	0	0	0	0	0	0	5	6	6	5	9	2	2	0	0	0	0	0	0	0	0.305667	0.804432	0
ENSG00000223450	1	0	0	2	0	0	0	4	2	1	2	4	0	0	0	2	1	0	8	13	16	11	14	25	20	4	2	2	6	6	6	0	7	2	4	0	4	3	7	1	11	6	0	3	9	1	0.0870587	0	0
ENSG00000233771	2	0	0	0	0	0	0	1	0	2	0	6	0	0	0	0	0	0	0	0	0	0	0	0	0	0	0	0	2	0	0	0	0	0	0	0	0	0	0	0	0	0	0	0	0	0	0.0291637	0	0
ENSG00000171786	4	9	8	4	14	4	14	16	26	8	6	14	1	0	0	5	4	2	0	11	3	0	4	0	0	2	1	0	2	0	0	0	0	2	0	0	0	0	0	0	0	0	0	0	0	0	0.050526	0.128222	0.102453
ENSG00000224691	0	0	0	0	0	0	0	0	0	0	0	0	0	0	0	0	0	0	0	0	0	0	0	0	0	1	1	2	0	0	0	0	0	0	0	0	0	0	0	0	0	0	0	0	0	0	0	0	0
ENSG00000286572	0	0	0	0	0	0	0	0	0	0	0	0	0	0	0	2	0	0	0	0	0	0	0	0	0	0	0	0	0	0	0	0	0	0	0	0	0	0	0	1	0	0	0	0	0	0	0	0	0
ENSG00000272880	0	0	0	0	0	0	0	0	0	0	0	0	0	0	0	0	0	0	0	0	0	0	0	0	0	0	0	0	0	0	0	0	0	0	0	0	0	0	0	0	0	0	0	0	0	0	0	0	0
ENSG00000235101	0	0	0	1	0	1	0	0	0	2	0	0	0	0	0	0	0	0	1	1	2	4	0	0	2	3	2	0	1	4	2	0	0	0	0	1	0	0	2	3	1	1	5	11	16	2	0	0	0
ENSG00000228215	0	0	0	0	0	0	0	0	0	0	0	0	0	0	0	0	0	0	39	30	46	37	44	26	24	82	65	49	65	72	31	53	0	0	0	0	0	0	0	0	0	0	2	0	0	0	0	0	0
ENSG00000177807	0	2	1	2	0	0	6	8	0	0	3	0	0	6	10	4	16	11	2	2	0	0	0	6	0	7	2	2	4	3	2	0	8	4	8	4	5	14	8	2	12	14	7	4	10	13	0	0.0116536	0.00523777
ENSG00000163485	0	1	0	2	0	0	4	2	4	2	5	0	0	2	0	4	4	0	0	2	2	0	4	0	0	0	2	0	0	0	0	0	0	0	0	0	4	0	1	0	0	0	0	0	0	0	0	0.00869227	0
ENSG00000123838	0	0	0	0	0	0	0	0	0	0	0	0	1	2	3	6	3	8	0	0	0	0	0	0	0	0	3	2	10	4	7	7	0	0	0	0	2	3	0	6	3	10	7	10	10	6	0	0	0
ENSG00000000971	235	189	229	194	260	196	193	183	193	212	211	204	249	206	278	234	308	393	55	41	66	44	87	33	48	139	160	110	104	136	85	51	201	237	211	217	263	186	197	53	66	31	42	53	71	81	0.951154	0.862799	0.939719
ENSG00000233626	0	0	2	0	0	0	0	4	0	0	4	0	0	0	0	0	0	0	0	0	0	0	0	0	0	0	0	0	0	0	0	0	0	0	0	0	0	0	0	0	0	0	0	0	0	0	0	0	0.169671
ENSG00000185495	136	125	186	156	177	164	124	175	126	170	168	141	81	108	110	88	98	87	139	179	168	183	166	85	120	174	159	65	160	141	91	104	163	202	199	144	228	177	154	317	427	374	287	297	397	424	1.01003	1.04706	1.40052
ENSG00000233691	0	0	0	0	0	0	0	0	0	0	0	0	0	0	0	0	0	0	3	0	0	0	2	0	0	0	0	0	0	0	0	0	0	0	0	0	0	0	0	0	0	0	0	0	0	0	0	0	0
ENSG00000118200	304	227	261	240	287	300	238	208	205	236	188	257	272	304	362	297	373	427	39	30	23	33	49	17	19	41	37	23	37	26	47	22	250	343	352	257	302	323	220	89	158	111	110	125	112	131	1.26255	1.06332	1.09899
ENSG00000143228	107	57	111	62	83	118	105	94	124	92	107	115	64	77	88	88	82	114	46	68	66	74	90	33	53	54	38	34	90	52	40	53	585	571	595	542	641	604	655	232	293	282	201	248	269	354	1.02795	0.617629	1.08116
ENSG00000231615	5	4	14	4	2	0	4	0	0	4	3	10	0	0	0	0	0	0	0	0	0	0	0	0	0	11	5	0	4	6	8	10	6	2	2	1	0	0	0	29	46	38	32	46	49	26	0.120788	0.108988	0.342896
ENSG00000174514	48	50	103	52	58	57	77	52	59	67	73	74	42	62	56	63	46	58	231	211	261	191	291	149	158	215	196	128	198	180	104	120	82	98	75	98	80	60	89	158	248	281	212	190	245	212	0.267762	0.314588	0.582538
ENSG00000143178	88	89	86	67	118	97	48	65	72	55	75	76	51	28	85	54	40	90	80	45	86	48	79	53	47	102	81	79	134	108	77	88	158	118	123	146	97	118	95	60	72	78	75	63	63	65	0.746008	0.850973	0.739161
ENSG00000162409	0	0	0	0	0	0	2	0	0	2	0	1	0	0	0	0	0	0	2	0	1	2	0	0	0	1	4	0	0	0	2	0	0	10	0	2	0	2	6	0	0	0	0	0	0	0	0	0	0
ENSG00000224837	31	31	27	16	23	36	28	15	29	17	26	16	48	31	45	38	43	38	19	12	15	14	21	16	16	11	11	19	12	9	19	22	25	32	28	26	28	24	16	48	48	50	40	35	35	46	1.91813	2.16343	1.69379
ENSG00000116833	8	8	11	2	19	7	12	17	4	8	16	10	0	0	0	0	0	0	79	82	76	84	76	78	47	217	180	109	171	236	109	123	0	0	0	0	0	0	0	2	4	2	2	7	6	0	0.0342556	0.0386364	0.0477545
ENSG00000272205	14	11	5	11	6	17	2	6	2	4	4	2	0	0	0	0	0	0	0	6	0	3	5	4	1	0	0	0	2	2	0	0	2	3	1	4	0	2	6	2	2	0	0	0	0	2	0.663025	0.587569	0.240077
ENSG00000227740	202	179	202	184	204	235	209	185	190	248	246	165	257	254	291	296	310	313	251	252	277	231	257	176	163	252	182	116	228	228	141	151	496	604	560	574	571	525	510	264	341	336	277	330	354	387	5.43243	5.42951	5.50775
ENSG00000135824	0	0	0	0	0	0	0	0	0	0	0	0	0	0	0	0	0	0	10	6	6	3	3	6	3	2	0	1	2	2	0	0	3	0	2	2	5	4	4	0	0	0	0	0	0	0	0	0	0
ENSG00000260990	0	0	0	0	0	0	0	0	0	0	0	0	0	0	0	0	0	0	0	0	2	0	0	0	0	0	0	0	0	0	0	0	0	0	0	0	0	0	0	0	0	0	0	0	0	0	0	0	0
ENSG00000000457	285	225	281	206	318	224	324	314	376	360	309	286	184	155	162	170	224	221	415	395	504	373	451	251	258	470	411	321	417	472	308	287	415	491	469	459	493	407	426	513	727	747	607	620	699	816	1.33737	1.19085	1.33689
ENSG00000143507	2508	2204	2488	2127	2718	2427	2675	2429	2727	2888	2966	2678	1786	1587	2161	1856	2053	2226	671	673	771	671	777	463	480	665	655	372	609	656	388	350	1014	1239	1168	1206	1297	1097	1152	482	649	619	516	552	652	638	28.6542	28.4012	28.8197
ENSG00000285638	0	0	0	0	0	0	0	0	0	0	0	0	0	0	0	0	0	0	0	0	0	0	0	0	0	0	0	0	0	1	0	0	0	0	0	0	0	0	0	0	0	0	0	0	0	0	0	0	0
ENSG00000226520	0	0	0	0	0	0	0	0	0	0	0	0	0	0	0	0	0	0	0	0	0	0	0	0	0	3	2	0	2	0	0	3	0	0	0	0	0	0	0	0	0	0	0	0	0	0	0	0	0
ENSG00000198483	76	65	53	62	64	60	55	45	22	38	57	54	77	87	126	79	108	119	6	6	16	3	9	2	8	13	19	10	10	10	8	10	19	24	26	30	28	12	16	14	18	16	12	11	21	25	0.729916	0.704105	0.516077
ENSG00000143367	87	98	104	72	141	122	89	130	106	99	117	98	65	50	80	68	66	86	24	29	36	23	40	19	21	51	30	40	35	38	16	22	36	36	34	44	60	27	46	32	25	47	26	32	19	32	0.724598	0.920596	0.878195
ENSG00000260021	0	4	0	2	0	0	0	0	0	0	0	0	4	6	4	4	2	3	0	0	0	0	0	0	0	0	0	2	6	2	8	0	1	4	3	2	0	0	1	0	0	2	0	0	0	0	0	0.246144	0
ENSG00000230987	0	0	0	0	0	0	0	0	0	0	0	0	0	0	0	0	0	0	0	0	0	0	0	0	0	0	0	0	0	0	2	0	0	0	0	0	0	0	0	0	0	0	2	0	0	0	0	0	0
ENSG00000275392	0	0	0	0	0	0	0	0	0	0	0	0	0	0	0	0	0	0	0	0	0	0	0	0	0	0	0	0	0	2	0	0	0	0	0	0	0	0	0	0	3	9	3	4	11	6	0	0	0
ENSG00000215833	0	0	0	0	0	0	0	0	0	2	0	0	0	0	0	0	0	0	0	0	0	0	0	0	0	0	0	0	0	0	0	1	0	0	0	0	0	2	0	0	0	0	0	0	0	0	0	0	0
ENSG00000229291	0	0	0	0	2	0	0	0	0	0	0	0	1	0	0	1	0	0	3	1	1	0	1	0	0	0	5	0	1	2	0	0	0	4	0	0	2	0	0	0	0	1	0	0	0	0	0	0	0
ENSG00000225325	0	0	0	0	0	0	0	0	0	0	0	0	0	0	0	0	0	0	0	0	0	2	0	0	0	0	0	0	0	0	0	0	0	0	0	0	0	0	0	0	0	0	0	0	0	0	0	0	0
ENSG00000276110	0	0	0	0	0	0	0	0	0	0	0	0	0	0	0	0	0	0	0	0	1	0	2	0	0	0	1	0	0	0	0	0	0	0	0	0	0	0	0	0	0	0	0	0	0	0	0	0	0
ENSG00000197959	65	40	49	32	68	37	49	36	42	34	60	43	58	44	53	48	66	58	290	278	396	258	344	213	189	358	371	212	394	376	272	208	65	48	55	65	47	63	35	33	68	65	44	54	79	79	0.185314	0.128623	0.141635
ENSG00000234775	0	0	0	0	0	0	0	0	0	0	0	0	0	0	0	0	0	0	1	0	0	0	0	0	0	0	0	0	0	0	0	0	0	0	0	0	0	0	0	0	0	0	0	0	0	0	0	0	0
ENSG00000133063	223	178	259	151	256	217	246	231	292	336	283	266	93	112	119	115	98	93	14	11	19	18	20	7	24	29	12	13	7	24	4	2	2	3	6	5	2	11	2	5	8	6	11	5	10	2	0.931535	0.838647	1.09692
ENSG00000229961	0	0	0	0	0	0	0	0	0	0	0	0	0	0	0	0	0	0	17	28	19	13	9	7	12	1	4	12	18	12	4	6	0	0	0	0	0	0	0	0	0	0	0	0	0	0	0	0	0
ENSG00000180999	0	0	0	0	0	0	1	0	0	2	1	2	0	0	0	1	1	0	0	0	0	0	0	0	0	2	0	0	0	0	2	2	0	0	0	0	0	0	0	0	0	0	0	0	0	0	0	0	0
ENSG00000234277	0	0	0	0	0	0	0	0	0	0	0	0	0	0	0	0	0	0	0	0	0	2	0	0	0	0	0	0	0	0	0	0	0	0	0	0	0	0	0	0	0	0	0	0	0	0	0	0	0
ENSG00000157064	9	0	6	10	6	2	0	0	0	0	0	0	0	0	0	0	0	0	0	0	0	0	0	0	0	0	0	0	0	0	0	0	0	1	0	0	0	0	0	0	0	0	0	0	0	1	0.0418679	0	0.0282989
ENSG00000288139	0	0	0	0	0	0	0	0	0	0	0	0	0	0	0	0	0	0	0	0	0	0	0	0	0	0	0	0	0	0	0	0	2	2	4	2	0	0	0	0	0	0	0	0	0	0	0	0	0
ENSG00000203666	368	330	368	255	319	382	310	229	266	326	316	288	497	427	516	421	542	563	135	122	110	125	123	89	74	141	156	103	142	125	87	98	121	159	122	78	121	82	148	28	72	57	25	50	50	77	1.38096	1.39673	1.40011
ENSG00000226015	91	73	112	63	126	80	103	80	104	129	101	113	64	61	91	88	96	106	55	60	49	51	63	41	43	61	101	88	92	84	54	51	82	99	67	86	93	85	93	76	91	115	93	114	93	122	1.7738	1.60491	2.21341
ENSG00000059588	575	516	542	471	623	553	713	743	813	779	781	693	572	548	678	585	642	751	1251	1142	1344	1127	1284	799	824	1403	1282	883	1258	1361	775	724	1949	2063	1931	2017	2181	1841	1714	1405	2021	1895	1436	1691	1929	2050	2.37521	2.40408	2.26994
ENSG00000265972	2650	2344	2618	2087	2852	2597	2394	2218	2500	2403	2532	2441	2466	2443	3109	2587	3030	3394	12315	12534	13917	12116	14015	8821	8489	9467	8655	5872	7988	8820	5395	5402	3151	3487	3336	3348	3574	3202	3059	3441	4446	4489	3693	4016	4304	5075	23.7491	23.6932	23.7876
ENSG00000231512	0	0	0	0	0	0	1	2	0	0	0	0	0	0	0	0	0	1	1	0	0	1	2	0	0	0	0	0	0	0	0	0	0	0	0	0	0	0	0	0	0	0	0	0	1	0	0	0	0
ENSG00000143162	6740	6057	6648	5339	6867	6616	3174	2983	3194	3675	3752	3534	5831	5530	7369	6016	7352	7575	332	321	348	336	366	208	195	341	351	199	304	324	212	215	2077	2448	2333	2256	2343	2195	2008	423	651	568	445	504	475	600	66.2488	67.1492	66.2505
ENSG00000237379	0	0	0	0	0	0	0	0	0	0	0	0	0	0	0	0	0	0	0	0	0	0	0	0	0	0	0	1	0	0	0	0	0	0	0	0	0	0	0	0	0	0	0	0	0	0	0	0	0
ENSG00000275131	288	211	250	256	259	196	224	235	212	231	261	237	155	162	209	161	173	180	78	82	110	100	124	56	46	99	74	42	59	90	37	51	198	265	286	283	272	224	232	217	304	293	261	244	291	341	0.984969	0.813912	0.866861
ENSG00000287452	0	0	0	0	0	0	0	0	0	0	0	0	0	0	0	0	2	0	0	0	0	0	0	0	0	0	0	0	0	0	0	0	0	0	0	0	0	0	0	0	0	0	0	0	0	4	0	0	0
ENSG00000232959	6	0	0	0	0	0	0	0	0	0	0	0	2	0	10	3	0	2	14	12	8	8	6	8	6	4	6	6	2	9	0	4	0	2	3	1	2	5	3	6	3	6	4	5	4	3	0.568307	0	0
ENSG00000233791	133	134	171	147	182	206	152	154	168	176	169	194	92	79	88	85	104	101	551	593	681	575	642	485	416	960	946	604	803	918	511	549	96	149	111	127	160	101	125	38	74	60	79	51	60	78	1.57642	1.79139	2.05492
ENSG00000159166	37	27	31	32	25	29	28	39	21	25	23	36	4	4	7	7	1	2	0	0	0	0	2	0	0	0	0	0	0	0	0	0	13	7	6	6	6	4	8	16	3	3	7	18	11	7	0.366469	0.301623	0.311298
ENSG00000117153	591	605	685	539	761	631	610	668	696	708	804	769	577	503	615	579	610	718	361	372	441	341	407	235	234	461	351	263	387	371	261	251	445	453	430	399	554	382	366	554	711	785	565	630	656	760	5.44144	6.2827	6.39435
ENSG00000122224	577	509	569	484	676	594	652	641	648	673	691	619	217	239	269	291	237	267	771	724	853	746	891	419	541	1315	1198	832	1148	1362	709	734	1049	1219	1188	1256	1329	949	955	1868	2534	2400	1945	2329	2363	2485	2.04391	2.03362	2.04352
ENSG00000131779	984	909	1004	810	1064	1041	795	793	862	949	964	903	570	599	801	574	682	773	796	855	899	807	951	553	516	878	812	595	827	986	499	652	996	1094	1044	1045	1103	1090	986	1524	1844	1874	1460	1717	1835	2021	18.4994	19.2749	19.1371
ENSG00000228288	21	16	12	9	15	15	9	10	3	2	8	5	0	0	0	4	0	0	0	0	0	1	10	1	0	6	11	10	6	6	4	4	4	9	0	2	4	2	2	4	4	8	0	1	4	9	0.762106	0.654909	0.441527
ENSG00000162782	0	0	0	0	0	2	0	0	0	0	0	0	0	0	0	0	0	0	0	0	0	0	0	0	0	0	0	0	0	1	0	0	0	0	0	0	0	0	0	0	0	0	0	0	2	0	0	0	0
ENSG00000162704	34471	29507	33146	27193	35556	32176	28206	26210	28269	30270	31614	29346	39772	38887	49628	43121	48490	50835	12024	11973	12965	11862	12941	8866	8437	17089	15073	10192	15126	15797	10621	11701	23254	25406	24040	24620	26532	24480	23569	20530	27314	26423	21042	24645	26790	29835	104.542	100.931	101.917
ENSG00000233196	0	0	0	0	0	0	0	0	0	0	0	0	0	0	0	0	0	0	0	0	0	0	0	0	0	0	0	0	0	0	0	0	0	0	0	0	0	0	0	0	2	2	2	0	0	7	0	0	0
ENSG00000229220	0	0	0	0	0	0	0	0	0	0	0	0	0	0	0	0	0	0	0	0	0	0	0	0	0	0	0	0	3	2	0	2	0	0	0	0	0	0	0	0	0	0	0	0	0	0	0	0	0
ENSG00000143653	2740	2538	2754	2302	3109	2775	2113	2051	2297	2441	2324	2212	3541	3533	4049	3629	4270	4535	235	188	251	213	194	166	134	610	547	384	598	555	408	448	408	391	377	399	517	387	439	615	789	694	666	689	739	869	41.3352	43.1843	42.1224
ENSG00000135837	1172	1001	1087	796	1172	1097	1098	982	1064	1099	1044	1096	539	497	657	584	634	770	1317	1418	1600	1280	1547	1042	948	1265	1214	810	1217	1304	720	748	1338	1431	1357	1319	1463	1241	1303	1164	1593	1445	1181	1364	1417	1693	2.65438	2.55702	2.496
ENSG00000117595	78	41	91	56	70	68	104	80	118	89	105	50	41	27	48	34	25	35	2	0	0	2	0	0	0	2	4	2	1	2	0	4	14	12	19	12	11	8	6	7	0	5	4	8	5	2	0.5068	0.300463	0.599464
ENSG00000230280	1	0	0	3	0	0	0	0	0	0	1	0	0	0	1	0	1	0	0	0	0	0	2	0	1	0	0	0	0	0	0	0	0	0	1	0	0	0	0	1	0	0	0	1	0	0	0.0351838	0	0
ENSG00000228560	0	0	0	0	0	0	0	0	0	0	0	0	0	0	0	0	0	0	0	0	0	0	0	0	2	2	1	1	2	0	0	0	0	0	0	0	0	0	0	0	0	0	0	0	0	0	0	0	0
ENSG00000158711	2147	2066	2300	1864	2454	2114	2069	1834	2108	2243	2250	2090	1974	1939	2381	2226	2447	2728	2968	2948	3347	2855	3114	1971	1821	3184	3154	2086	3057	3168	1810	1862	3507	3790	3607	3702	3892	3560	3527	2886	3823	3511	2678	3283	3428	3866	5.68825	6.17365	6.17809
ENSG00000228081	0	0	0	0	0	0	0	0	0	2	0	0	0	0	0	0	0	0	0	0	0	0	0	0	0	0	0	0	0	0	0	0	0	0	0	0	0	0	0	0	0	0	0	0	0	2	0	0	0
ENSG00000234975	1311	1269	1581	960	1607	1314	1196	1124	1329	1308	1197	1357	1102	1078	1412	1239	1262	1354	67	55	44	63	45	35	36	83	85	75	84	92	74	83	167	202	194	210	214	199	126	80	111	92	81	106	109	119	102.776	112.206	125.661
ENSG00000163444	1363	1329	1527	1224	1606	1479	927	795	899	954	1059	1061	1122	1133	1332	1277	1418	1431	842	856	907	824	979	627	502	1294	1238	781	1158	1115	836	861	1803	1902	1799	1841	1978	1824	1751	893	1351	1208	988	1102	1184	1262	10.9022	11.9897	12.3834
ENSG00000162851	882	783	803	662	948	787	741	755	712	868	881	801	849	810	1095	928	1039	1111	545	602	663	489	649	366	409	557	507	344	519	544	348	333	1102	1217	1210	1203	1237	1136	1175	794	1198	1109	820	1072	1120	1243	15.9683	15.9889	14.7396
ENSG00000271427	0	1	0	0	0	0	0	0	0	0	0	0	0	0	0	0	0	0	2	4	4	0	0	0	2	4	0	0	12	4	0	4	0	2	0	6	6	2	4	1	4	1	2	2	8	4	0	0.0633553	0
ENSG00000261817	2	1	0	1	0	3	3	1	0	2	0	0	0	6	0	4	1	1	3	9	0	4	1	4	5	0	1	2	3	2	2	0	2	2	0	0	2	0	3	5	7	2	0	1	6	7	0.127663	0.0719947	0
ENSG00000143353	2202	2012	1977	1683	2133	2128	1682	1690	1876	1936	1996	1867	3235	3053	3850	3288	3646	4001	893	855	914	869	954	644	606	1168	1056	634	1016	1031	665	742	1062	1191	1103	1212	1406	1114	1107	1511	2170	2064	1499	1845	1897	2092	24.1829	24.9221	22.0129
ENSG00000197965	2043	1788	2037	1668	2252	2156	966	930	1091	1147	1010	1106	1563	1354	1759	1630	1766	1989	134	134	134	160	115	103	89	167	143	123	167	163	81	100	925	781	839	893	981	813	781	334	518	432	366	458	420	522	9.33461	9.21426	9.43623
ENSG00000143493	1266	1165	1251	1091	1418	1233	960	1042	1108	1288	1219	1102	1023	1032	1292	1104	1332	1394	467	579	527	498	528	325	362	495	472	310	447	527	301	328	1929	2177	2193	2238	2176	1932	1910	1007	1186	1179	943	1233	1114	1312	7.67748	7.96848	7.69169
ENSG00000230777	3	4	4	3	9	6	5	7	4	7	7	8	4	2	1	3	6	0	12	4	7	6	12	4	5	13	6	6	3	8	7	5	29	18	23	27	34	20	18	0	1	4	0	4	2	6	0.566645	0.852147	0.766001
ENSG00000179397	35	38	45	34	42	35	33	72	57	53	43	50	19	31	55	48	49	50	69	48	109	72	50	51	40	68	59	33	47	46	34	30	32	41	38	34	38	38	25	92	84	88	61	87	93	124	0.255125	0.312416	0.332565
ENSG00000117592	2438	2246	2570	2074	2682	2425	1990	1842	2034	2333	2372	2163	2189	2009	2669	2211	2450	2968	1904	2014	2159	2074	2246	1304	1380	2448	2224	1437	2178	2333	1607	1696	1955	2130	2062	2109	2150	1746	1797	1662	2262	2288	1896	2114	2134	2364	34.0737	35.4047	36.4165
ENSG00000152904	1093	966	1065	833	1203	1037	927	850	927	988	1010	927	1182	1140	1453	1167	1283	1485	704	658	753	665	712	513	446	654	542	459	562	657	402	479	1009	1139	1089	1045	1158	976	1032	1104	1509	1309	1051	1254	1350	1626	9.2682	9.23883	9.15597
ENSG00000186197	77	90	90	72	89	73	52	44	79	46	71	69	22	32	33	43	21	18	43	43	42	51	45	42	25	78	71	34	53	37	46	58	43	79	69	65	66	35	60	35	34	47	34	46	59	56	0.622374	0.82048	0.737535
ENSG00000229067	0	0	0	0	0	0	0	0	0	0	0	0	1	2	0	3	2	2	0	0	0	0	0	0	0	0	0	0	2	0	0	0	0	0	0	0	0	0	0	0	0	0	0	0	0	0	0	0	0
ENSG00000271554	1	0	0	0	2	1	1	4	2	4	2	5	3	6	2	2	0	1	5	11	7	3	4	0	3	6	2	2	4	5	3	1	1	5	1	9	9	6	0	14	11	5	6	6	11	6	0.0490118	0	0
ENSG00000230231	0	0	0	0	0	0	0	0	0	2	0	7	1	1	5	3	2	6	0	0	0	1	2	0	1	0	0	0	1	0	2	0	1	1	1	0	1	2	6	5	4	7	3	8	3	9	0	0	0
ENSG00000094963	0	0	0	0	0	0	0	0	0	0	0	0	0	0	0	0	0	0	0	0	0	0	0	0	0	5	4	5	2	4	2	0	0	0	0	0	0	0	0	15	6	18	6	15	8	9	0	0	0
ENSG00000228606	59	100	90	81	81	79	99	95	91	95	96	98	35	8	36	14	41	24	165	174	234	175	224	110	127	212	185	119	166	199	137	140	98	137	115	106	150	95	128	194	303	266	219	235	251	238	1.38692	2.65133	2.14497
ENSG00000228879	0	0	0	0	0	0	0	0	0	0	0	0	0	0	0	0	0	0	0	0	0	0	0	0	1	2	0	0	5	0	0	0	0	0	0	0	0	0	0	3	0	0	1	0	8	2	0	0	0
ENSG00000227925	1	4	0	2	4	3	17	7	4	14	11	6	0	3	3	5	3	4	1	1	2	1	0	0	0	0	0	0	0	0	0	0	2	1	4	4	2	3	4	4	5	5	4	1	9	3	0.0394368	0.177921	0
ENSG00000162670	0	0	0	0	0	0	0	0	0	0	0	0	0	0	0	0	0	0	2	7	17	2	9	6	9	0	6	3	2	0	0	4	0	0	0	0	0	0	0	0	0	0	4	0	0	0	0	0	0
ENSG00000225712	0	0	2	0	0	0	4	0	0	0	0	0	4	0	0	0	0	0	0	0	1	0	0	0	0	2	2	0	0	0	2	0	0	0	0	2	0	0	2	0	0	4	2	0	2	0	0	0	0.15374
ENSG00000159176	938	803	961	747	1050	728	799	702	793	814	871	722	372	367	444	385	419	481	53	105	66	76	79	65	42	223	191	150	235	239	131	164	474	426	429	376	445	339	385	271	407	336	338	316	345	364	2.93625	2.83512	3.04995
ENSG00000162761	0	0	0	0	0	0	0	0	0	0	0	0	0	0	0	0	0	0	0	0	0	0	0	0	2	0	0	0	2	0	0	2	0	0	0	0	0	0	0	0	0	0	0	0	0	0	0	0	0
ENSG00000143199	7	2	5	0	4	3	8	1	11	8	2	0	0	0	0	0	0	0	2	1	6	4	7	1	5	18	2	0	4	22	2	8	0	0	0	0	1	0	1	3	13	11	8	7	6	7	0.0368167	0.0118643	0.0266622
ENSG00000236523	19	20	17	24	19	11	32	29	41	29	28	26	27	13	33	35	22	29	33	29	44	29	48	28	27	25	18	11	24	14	18	13	7	16	13	13	9	10	15	44	31	41	38	61	55	36	0.837212	0.993978	0.75947
ENSG00000117479	610	555	588	402	564	555	559	497	530	631	640	569	451	488	561	474	536	668	417	450	435	382	446	303	272	375	403	262	333	431	239	247	255	325	295	266	322	260	285	233	340	347	270	289	335	357	4.51472	4.63297	4.41223
ENSG00000179930	0	0	0	0	0	0	0	0	0	0	0	0	6	4	6	10	15	8	0	0	0	0	0	0	0	0	0	0	0	0	0	0	0	0	0	0	0	0	0	0	0	0	0	0	0	0	0	0	0
ENSG00000007908	5	4	6	1	3	1	6	4	7	8	2	1	0	0	0	0	0	0	11	9	2	9	15	2	9	24	9	10	22	21	22	3	37	20	16	21	26	23	34	18	13	14	23	12	9	13	0.0352145	0.0317744	0.0428433
ENSG00000092978	890	748	882	761	1014	921	833	607	693	809	811	806	884	941	1027	1012	1060	1188	718	685	725	651	770	501	458	565	574	374	555	550	391	410	515	621	601	576	573	567	533	1045	1405	1288	1082	1205	1366	1495	3.25143	3.08213	3.26688
ENSG00000143499	505	413	440	349	506	477	332	346	340	392	388	380	567	526	636	658	699	703	286	293	284	235	281	175	183	427	317	251	319	380	208	258	1101	1198	1192	1184	1237	1082	1092	549	779	673	577	697	683	784	3.33624	3.07738	2.94712
ENSG00000278467	2	4	0	0	0	0	5	4	1	2	5	7	0	0	0	0	0	0	11	7	9	5	8	1	2	2	7	2	4	1	2	4	0	0	0	0	0	0	0	0	6	5	5	4	4	6	0.112736	0.254306	0
ENSG00000163518	0	6	0	4	2	6	15	28	30	14	14	6	0	0	0	0	0	0	1	6	1	0	4	1	6	20	15	10	19	20	7	12	5	10	9	20	4	10	6	25	44	36	40	34	37	39	0	0.0563049	0
ENSG00000243155	31	20	27	22	36	39	15	29	17	20	28	16	9	5	12	11	13	18	0	7	6	9	6	6	9	18	3	3	8	11	6	6	45	58	38	32	49	35	39	23	19	18	21	16	26	22	0.413062	0.300572	0.364751
ENSG00000188404	14349	12628	14219	11813	15728	14164	12507	11859	12550	13165	14037	12956	5879	5501	7109	5988	6540	7457	21850	22306	24393	21714	24177	15512	14987	32424	30364	20823	29405	31482	19478	19195	33017	35497	33721	35330	36448	31891	31878	50323	66801	64840	53517	60014	65411	74212	169.702	168.447	170.495
ENSG00000233693	0	0	0	0	0	0	0	0	0	0	0	0	0	0	0	0	0	0	0	0	0	0	0	0	0	0	0	0	0	0	0	0	0	0	0	0	0	0	0	0	0	0	0	0	0	0	0	0	0
ENSG00000227735	2	0	0	0	0	0	1	0	0	2	5	0	0	0	0	0	0	0	2	2	10	4	2	3	2	1	1	0	1	0	1	0	0	0	0	0	0	0	0	2	0	5	0	5	0	0	0.2175	0	0
ENSG00000232864	0	0	0	0	0	0	0	0	0	0	0	0	0	0	0	0	0	0	20	36	45	29	18	19	12	2	8	1	13	2	1	2	0	4	0	0	2	0	2	0	0	0	0	0	0	0	0	0	0
ENSG00000143196	0	0	0	0	0	0	0	0	0	0	0	0	0	0	0	0	0	0	0	0	0	0	0	0	0	0	2	0	0	0	0	0	0	0	0	0	0	0	0	0	0	0	0	0	0	0	0	0	0
ENSG00000237463	0	0	0	0	0	0	0	0	0	0	0	0	0	0	0	0	0	0	0	0	0	0	1	0	0	0	0	0	0	0	0	0	0	0	0	0	0	0	0	0	0	0	0	0	0	0	0	0	0
ENSG00000224462	2	2	1	0	2	0	0	0	0	2	1	0	0	0	0	0	0	0	1	2	4	2	0	0	2	2	2	0	0	4	0	0	1	1	0	4	2	0	2	4	12	16	5	16	4	8	0.0341244	0.0384884	0.0172988
ENSG00000236942	5	6	6	1	4	7	3	2	2	1	0	1	0	4	8	4	8	2	9	4	2	9	8	2	6	9	0	3	5	5	4	3	2	9	2	15	3	10	2	3	2	5	15	16	6	4	0.45749	0.619195	0.556599
ENSG00000287205	0	0	0	1	0	5	2	2	1	2	0	8	0	0	0	0	0	0	0	0	0	0	0	0	0	0	0	0	0	0	0	0	2	2	0	4	0	4	8	6	13	3	2	0	0	2	0	0	0
ENSG00000238005	28	25	26	16	34	21	19	21	30	29	31	33	25	25	29	24	20	37	261	255	303	268	279	223	219	379	357	229	319	314	204	255	14	11	8	20	7	8	6	7	8	5	6	7	4	3	0.245685	0.247414	0.231299
ENSG00000203697	0	0	0	0	0	0	0	0	0	0	0	0	0	0	0	0	0	0	0	0	0	2	1	1	0	14	7	5	6	2	3	7	0	0	0	0	0	0	0	0	0	0	0	0	0	0	0	0	0
ENSG00000116574	344	283	318	259	280	303	268	277	338	297	320	357	400	427	480	404	514	552	121	121	139	99	138	123	69	108	111	70	108	93	35	68	209	227	240	193	248	189	167	63	97	108	88	86	72	110	2.80221	2.60012	2.62633
ENSG00000287929	0	0	0	0	0	0	0	0	0	0	0	0	0	0	0	0	0	0	0	0	0	0	0	0	0	1	0	0	0	0	0	0	0	0	0	0	0	0	0	0	0	0	0	0	0	0	0	0	0
ENSG00000186283	1154	1046	1079	937	1279	1214	765	684	771	772	829	877	575	590	730	632	722	708	407	365	427	343	459	262	204	651	671	521	657	700	444	463	640	718	669	722	794	570	606	406	503	491	451	439	400	525	11.561	11.8192	10.9595
ENSG00000159346	13724	12283	14059	11132	14981	13883	9923	9458	10526	10710	11004	10480	4965	4876	6323	5545	5846	6422	6240	6243	7115	6065	7146	4490	4164	8865	8200	5659	8325	8556	5306	6130	6360	7022	6934	7218	7414	6184	5868	3882	5120	5094	4158	4574	4698	5115	142.393	143.74	147.891
ENSG00000160856	511	464	460	347	581	486	619	585	540	692	676	614	127	77	148	116	121	115	1786	1825	2000	1720	1965	1240	1231	2272	2371	1471	2116	2369	1273	1035	787	895	786	829	804	794	721	2231	3216	2735	2617	2816	2925	3482	2.55886	2.62065	2.33541
ENSG00000226292	0	0	0	0	0	0	0	0	0	0	0	0	0	0	0	0	0	0	0	0	0	0	0	0	0	0	0	0	0	0	0	0	0	0	0	0	0	0	0	0	0	1	2	0	4	2	0	0	0
ENSG00000121481	2181	1991	2178	1855	2278	2000	1902	1923	2116	2289	2130	1966	2899	2786	3519	3232	3514	3835	2521	2499	2745	2554	2796	1782	1622	2153	1954	1373	2107	2099	1373	1378	3409	3815	3520	3702	3855	3367	3347	2627	3755	3412	2524	3166	3122	3501	18.0347	18.5691	18.2596
ENSG00000227940	0	0	0	0	0	0	0	0	0	0	0	0	0	0	0	0	0	0	0	0	0	0	0	0	0	0	0	0	0	0	0	0	0	0	0	0	0	0	0	0	0	1	0	0	0	0	0	0	0
ENSG00000117139	654	540	667	517	635	590	774	700	766	824	785	748	351	354	465	378	418	508	918	1144	1116	930	1230	711	699	1011	997	652	821	1068	613	614	868	1019	977	988	1052	816	843	862	1116	1044	833	965	977	1093	0.848363	0.790065	0.877222
ENSG00000143248	101	98	125	78	111	92	63	94	49	73	69	77	77	114	129	145	114	146	75	41	56	35	71	35	41	42	67	34	58	50	45	54	18	32	13	19	6	14	19	34	39	21	40	41	46	46	0.492478	0.53896	0.617953
ENSG00000230623	10	4	2	7	7	8	7	4	11	4	10	18	4	4	14	5	15	7	1	0	0	0	2	0	0	0	9	6	1	5	2	1	2	5	1	3	2	4	3	2	1	2	0	2	0	0	0.0792997	0.0357764	0.0160798
ENSG00000278455	0	0	0	0	0	0	0	0	0	0	0	0	0	0	0	0	0	0	0	0	0	0	0	0	0	0	0	0	0	0	0	0	0	0	0	0	0	0	0	0	0	0	0	0	2	0	0	0	0
ENSG00000132704	69	54	52	50	49	62	77	91	84	118	99	104	23	35	44	44	36	49	162	192	185	145	180	137	119	201	172	134	167	157	109	138	115	141	156	123	134	143	119	206	351	321	283	283	332	319	0.440612	0.388925	0.336659
ENSG00000258082	10	17	17	20	7	10	24	16	17	14	17	13	20	17	11	22	9	16	221	263	263	252	277	159	156	371	356	269	389	380	232	263	2	2	0	2	0	3	7	0	0	6	0	0	0	2	0.381782	0.732031	0.658028
ENSG00000162814	2	0	0	0	3	0	0	0	0	0	0	0	1	7	2	0	3	1	0	0	0	0	0	0	0	0	0	0	0	0	0	0	0	0	0	0	0	0	0	8	8	8	8	12	7	13	0.0099152	0	0
ENSG00000231768	5	0	1	5	2	0	2	0	0	2	0	0	0	0	0	0	0	0	0	0	0	0	0	0	0	2	8	0	2	4	6	3	0	0	0	0	0	0	0	1	4	4	0	0	0	4	0.0497823	0	0.0100945
ENSG00000163435	15	12	16	7	11	11	4	4	2	4	3	0	8	21	23	25	16	14	15	11	11	3	4	4	7	10	6	11	4	17	5	6	9	13	10	18	4	5	2	1	6	11	10	10	6	15	0.0674202	0.0608338	0.0729119
ENSG00000225172	0	0	0	1	0	0	0	0	0	2	0	0	0	0	0	0	0	0	0	0	0	0	0	0	0	0	0	0	0	0	0	0	0	0	0	0	0	0	0	0	0	0	0	0	0	0	0	0	0
ENSG00000228239	0	0	0	0	0	0	0	0	0	0	0	0	0	0	0	0	0	0	0	0	0	0	0	0	0	0	0	0	0	0	0	0	0	0	0	0	0	0	0	0	0	0	0	0	0	0	0	0	0
ENSG00000116132	0	1	0	0	0	0	0	0	0	0	0	0	0	4	16	4	11	10	0	0	2	0	0	0	0	0	0	0	0	0	0	0	0	0	0	0	0	0	0	0	0	0	0	0	0	0	0	0.00441674	0
ENSG00000282221	0	0	0	0	0	0	3	2	0	6	1	2	1	0	0	8	6	2	0	0	0	0	0	0	0	2	4	2	2	0	4	0	0	0	0	0	0	0	0	4	0	6	5	8	10	0	0	0	0
ENSG00000238042	8	6	20	9	13	11	7	12	14	20	9	8	4	10	7	23	12	9	0	0	0	0	0	0	0	0	0	0	0	0	0	0	0	0	1	4	2	0	1	11	6	4	7	5	4	8	0.258908	0.219014	0.656243
ENSG00000231877	0	0	0	0	0	0	0	0	0	0	0	0	0	0	0	0	0	0	2	0	0	0	0	0	0	0	0	0	0	0	0	0	0	0	0	0	0	0	0	0	0	0	0	0	0	0	0	0	0
ENSG00000116679	13136	11865	12953	10531	14133	12437	12661	11886	12303	13221	14177	13137	10470	10044	12612	11021	12393	13384	8541	8688	9745	8772	9642	5763	6034	10996	10165	6716	9937	10632	6396	6267	6178	7017	6633	6513	7201	5939	5887	5825	8303	8216	6395	7410	7757	8935	53.8901	54.9008	53.876
ENSG00000228536	3	9	17	5	20	3	3	1	2	9	6	4	11	3	6	7	9	3	0	0	0	0	0	0	0	5	6	2	0	1	0	0	5	5	3	11	4	10	6	17	30	23	22	22	26	51	0.0341545	0.115567	0.196225
ENSG00000230550	0	0	0	0	2	1	5	3	2	4	4	0	0	0	0	0	0	0	0	0	0	2	6	0	0	0	2	1	0	1	1	1	0	0	0	0	0	0	0	0	0	0	0	0	0	0	0	0	0
ENSG00000243636	0	0	0	0	0	0	0	0	0	0	0	0	0	0	0	0	0	0	0	0	0	0	0	0	0	0	1	0	0	0	0	0	0	0	0	0	0	0	0	0	0	0	0	0	0	0	0	0	0
ENSG00000162706	0	0	0	0	0	0	0	0	0	0	0	0	0	0	0	0	0	0	0	0	0	0	0	0	0	0	0	0	0	0	0	0	0	0	0	0	0	0	0	0	0	0	0	0	0	0	0	0	0
ENSG00000253326	0	0	0	0	0	0	0	0	0	0	0	0	0	0	0	0	0	0	0	0	0	0	0	0	0	0	0	0	0	0	0	0	0	0	0	0	0	0	0	0	0	0	0	0	0	0	0	0	0
ENSG00000235449	0	7	1	4	3	0	0	5	5	3	3	5	0	0	2	2	1	0	17	12	16	15	8	16	13	3	11	6	4	9	2	2	0	2	2	1	1	0	0	8	4	7	7	7	6	9	0	1.34213	0.17235
ENSG00000272755	0	0	2	0	1	0	2	0	2	0	1	8	5	0	0	0	0	0	0	2	4	2	0	2	4	1	0	0	2	0	2	0	24	26	16	25	18	14	11	2	0	4	4	2	0	0	0	0	0.115917
ENSG00000228470	0	0	0	0	0	0	0	0	0	0	0	0	0	0	0	0	0	0	0	0	0	0	0	0	0	5	1	0	4	4	0	3	0	0	0	0	0	0	0	1	5	1	0	0	3	2	0	0	0
ENSG00000021852	0	0	0	0	0	0	0	0	0	0	0	0	0	0	0	0	0	0	0	0	0	0	0	0	0	2	1	0	1	4	0	0	0	0	0	0	0	0	0	0	0	0	0	0	0	0	0	0	0
ENSG00000152092	0	0	0	0	0	0	0	0	0	0	0	0	0	0	0	0	0	0	2	2	1	2	4	2	2	5	0	2	0	0	0	0	0	0	0	0	0	0	0	0	0	0	0	0	0	0	0	0	0
ENSG00000234984	0	0	0	0	0	0	0	0	0	0	0	0	0	0	2	0	0	0	0	0	0	0	0	0	0	0	0	0	0	0	0	0	0	0	0	0	0	0	0	0	0	0	0	0	0	0	0	0	0
ENSG00000233540	17	13	12	15	18	8	4	10	6	4	8	12	2	5	3	4	3	2	7	13	14	13	17	14	14	8	10	2	9	5	0	2	13	8	10	9	7	12	17	9	10	15	18	6	14	18	1.38656	1.19591	0.99232
ENSG00000286383	0	0	0	0	0	0	0	0	0	0	0	0	7	1	0	0	8	1	0	0	0	0	0	0	0	0	0	0	0	0	0	0	0	0	0	0	0	0	0	0	0	0	0	0	0	0	0	0	0
ENSG00000280587	2	0	0	3	4	4	4	2	2	6	11	4	8	0	0	2	2	4	6	12	6	9	6	5	2	30	14	20	24	23	23	10	0	0	0	0	0	0	0	0	0	0	0	0	0	0	0.019803	0	0
ENSG00000229983	0	0	0	0	0	0	0	0	1	1	1	0	0	0	0	0	0	0	2	2	1	0	0	0	0	1	1	1	3	3	1	5	0	6	5	4	2	0	2	0	0	0	0	0	0	0	0	0	0
ENSG00000225920	173	148	220	144	186	213	210	218	239	199	247	219	191	201	208	242	283	266	353	336	411	290	385	205	227	357	338	209	335	367	216	182	166	252	223	195	244	195	167	338	508	493	373	382	397	436	8.54386	8.24394	11.0157
ENSG00000143476	44	65	56	53	64	59	54	25	49	41	69	54	5	2	0	15	24	17	45	29	37	23	28	24	21	63	87	46	135	82	56	50	513	536	574	533	579	504	517	17	35	35	37	62	33	41	0.288675	0.480988	0.372498
ENSG00000121486	1411	1156	1318	1031	1390	1281	883	849	839	939	1004	868	813	831	977	829	939	1062	204	229	270	243	289	211	184	214	144	144	183	179	140	138	1009	1117	986	1080	1235	1054	985	766	975	893	776	833	985	1149	9.27423	8.56986	8.78306
ENSG00000228437	0	0	0	0	0	0	0	0	0	1	0	0	1	3	1	4	0	8	0	0	0	0	0	0	0	0	0	0	0	0	0	0	0	0	0	0	0	0	0	0	0	0	0	0	0	0	0	0	0
ENSG00000117594	1323	1227	1465	1033	1416	1289	1064	1050	1129	1204	1253	1171	1466	1436	1822	1514	1586	1906	40	23	46	37	38	13	15	31	32	25	31	20	16	13	275	279	300	316	363	269	251	104	139	133	111	93	96	142	28.2614	29.5627	31.7286
ENSG00000214837	0	3	2	5	2	4	2	2	0	2	3	5	0	3	0	0	1	0	0	2	11	2	3	3	1	8	3	7	4	2	3	5	0	0	2	0	0	0	0	9	4	0	2	3	1	1	0	0.028453	0.0170511
ENSG00000224834	0	0	0	0	0	0	0	0	0	0	0	0	0	2	0	4	0	0	2	0	0	0	0	0	0	0	0	0	0	0	0	0	0	0	0	0	0	0	0	0	0	2	2	0	0	2	0	0	0
ENSG00000057252	11737	10348	11313	9677	12923	11658	11089	11109	11653	12220	12579	12064	8376	8080	10134	8872	10121	10454	1475	1562	1717	1536	1657	1093	1060	2118	1889	1208	1853	1958	1215	1213	2548	3066	2792	2837	3069	2740	2661	1775	2229	2151	1744	1977	2143	2439	54.1172	53.8145	52.8853
ENSG00000225982	0	0	0	0	0	0	0	4	6	4	0	2	0	0	0	0	0	0	4	0	0	2	0	0	4	0	0	0	0	0	0	0	0	0	0	0	0	0	0	0	0	0	0	0	0	0	0	0	0
ENSG00000285622	0	1	4	1	4	1	0	1	0	0	0	0	0	0	0	0	0	3	0	0	0	0	0	0	1	2	0	0	0	0	0	0	0	0	0	0	0	0	0	0	0	0	0	0	0	0	0	0.0216712	0.0779216
ENSG00000234070	0	0	0	0	0	0	0	0	0	0	0	0	0	0	0	0	0	0	0	0	1	0	0	0	0	0	0	0	0	0	0	0	0	0	0	0	0	0	0	0	0	0	0	0	0	0	0	0	0
ENSG00000272906	27	26	37	26	32	31	36	25	32	17	33	23	1	11	5	0	7	2	29	12	15	18	15	15	9	31	21	27	31	35	7	15	12	15	19	22	17	17	18	26	39	18	16	17	30	25	0.881766	0.957696	1.2251
ENSG00000233018	0	0	0	2	0	0	0	0	0	0	0	0	0	0	0	0	0	0	0	0	0	0	0	2	0	0	0	0	0	0	0	0	3	0	2	0	1	2	4	0	0	0	0	0	0	0	0	0	0
ENSG00000232586	0	0	0	0	0	0	0	0	0	0	0	0	2	1	0	0	0	0	0	0	0	0	0	0	0	0	0	0	0	0	0	0	0	0	0	0	0	0	0	0	0	0	0	0	0	0	0	0	0
ENSG00000123685	332	252	314	241	311	318	226	207	231	308	284	222	327	264	426	346	442	444	55	82	67	79	70	51	53	184	200	109	173	176	128	135	562	612	615	552	689	533	445	38	50	37	26	49	22	46	4.17407	3.57345	4.0025
ENSG00000162852	1720	1375	1662	1408	1691	1499	1517	1480	1633	1780	1733	1541	774	773	957	866	986	990	2106	2266	2275	2098	2541	1585	1485	2829	2733	1852	2501	2813	1716	2048	2312	2552	2544	2662	2718	2193	2232	1870	2601	2597	1951	2225	2550	2770	9.36354	8.44266	9.17323
ENSG00000232792	0	0	0	0	0	0	0	0	0	0	0	0	0	0	0	0	0	0	9	12	9	11	9	12	10	0	3	2	4	2	1	4	7	6	9	8	12	8	11	0	0	0	0	0	0	0	0	0	0
ENSG00000232621	0	0	0	0	0	0	0	0	0	0	0	0	0	0	0	0	0	0	0	0	0	0	0	0	0	2	0	0	2	0	3	1	0	1	0	0	1	0	2	0	0	0	0	0	0	0	0	0	0
ENSG00000273004	5	5	7	4	4	2	3	0	4	2	2	0	0	2	7	2	0	10	16	24	6	15	18	16	11	40	30	22	18	12	14	7	5	7	1	1	4	6	2	1	1	3	2	0	1	0	0.214752	0.242216	0.304822
ENSG00000143842	86	56	64	69	63	69	95	66	77	74	84	89	45	15	36	28	34	52	7	7	8	3	4	13	4	2	8	3	5	3	3	3	21	19	16	26	13	6	17	3	2	9	2	3	3	10	0.374352	0.274938	0.28245
ENSG00000268062	2	1	0	0	3	0	0	5	0	3	0	0	6	3	3	6	2	0	2	2	2	4	1	0	2	3	3	1	0	1	0	1	3	4	0	4	2	2	0	2	3	7	2	1	6	5	0.318214	0.179455	0
ENSG00000237409	0	0	0	0	0	0	0	0	0	0	0	0	0	0	0	0	0	0	0	0	0	0	0	0	0	0	0	0	0	0	0	0	4	1	1	2	2	0	2	0	0	0	0	0	0	0	0	0	0
ENSG00000116962	16	18	22	20	9	15	6	18	14	4	12	16	4	10	16	12	6	8	30	12	23	11	21	14	17	36	38	32	44	43	28	19	1	0	0	0	0	2	0	6	10	6	10	12	6	6	0.0889314	0.112842	0.123976
ENSG00000275585	0	1	3	0	5	2	2	11	1	0	3	4	0	5	4	4	6	13	2	3	1	6	3	8	2	8	1	1	6	5	3	3	0	2	0	1	0	1	3	0	4	3	4	1	3	1	0	0.027724	0.0747638
ENSG00000229757	0	0	0	0	0	0	8	3	2	9	2	4	0	0	0	0	0	0	1	1	0	0	1	0	0	2	0	0	2	2	0	0	1	0	0	3	0	0	0	2	1	1	4	2	2	4	0	0	0
ENSG00000232679	193	182	186	167	187	150	189	189	175	202	215	197	118	102	110	118	137	151	10	8	9	6	2	5	0	2	0	4	8	9	5	5	26	15	25	11	40	39	25	29	21	29	25	35	42	46	3.2878	3.49691	3.21248
ENSG00000159388	1289	1045	1190	934	1320	1254	1221	1213	1192	1261	1460	1290	948	883	1142	934	1139	1207	2123	2222	2590	2112	2437	1546	1436	3061	2637	1911	2732	2850	1749	1786	1695	2082	1893	2103	2029	1724	1785	1317	1856	1884	1489	1690	1650	1859	15.1009	13.808	14.1343
ENSG00000220749	27	34	15	15	36	32	38	41	28	33	25	33	47	29	42	31	41	45	63	69	51	62	54	35	47	65	52	39	44	66	41	40	52	88	63	70	59	60	65	37	70	72	60	65	58	56	1.80552	2.56438	1.01697
ENSG00000237074	0	0	0	0	0	0	2	0	5	10	0	2	0	0	0	0	0	0	7	5	2	9	8	0	1	3	4	4	6	2	4	1	0	0	0	0	0	0	0	3	0	0	0	2	11	3	0	0	0
ENSG00000236136	2	0	0	10	2	1	3	0	0	2	4	2	2	14	5	4	0	3	0	0	0	0	0	0	0	0	2	0	0	0	0	0	0	0	0	0	0	0	0	0	0	0	0	0	0	0	0.0767192	0	0
ENSG00000154380	62	52	77	64	83	59	47	28	52	53	58	63	99	106	136	107	132	78	44	55	50	39	72	27	33	32	46	18	35	56	33	35	103	74	111	119	110	128	75	80	116	97	75	83	118	139	0.133111	0.125919	0.167607
ENSG00000181450	162	125	187	171	156	175	150	117	133	169	192	115	113	115	138	111	140	132	346	321	356	296	359	252	247	363	308	244	322	367	208	231	139	161	191	178	204	179	139	399	639	557	433	519	506	671	0.586921	0.510787	0.686888
ENSG00000223519	0	0	5	3	2	2	2	3	0	4	0	6	0	0	0	0	0	1	17	17	13	15	13	5	10	27	24	15	12	28	17	13	0	0	1	2	5	2	3	9	5	6	8	4	11	12	0	0	0.046449
ENSG00000120333	4408	3720	4166	3591	4582	4233	3339	3131	3441	3539	3655	3343	5231	5087	6194	5459	6202	6444	1154	1186	1278	1103	1158	812	772	1294	1128	872	1066	1122	765	854	3544	4033	3617	3923	4104	3607	3264	3492	4726	4252	3412	4164	4104	4856	54.8855	52.2425	52.5914
ENSG00000117090	335	297	329	299	451	373	385	380	359	384	433	406	231	266	310	274	295	291	552	615	601	507	596	389	358	613	576	414	573	594	358	391	1072	1205	1208	1306	1355	1114	1213	323	518	456	360	408	419	482	2.53814	2.538	2.52724
ENSG00000286285	124	96	151	99	102	126	84	76	83	105	101	66	92	51	96	84	92	102	12	23	16	15	17	10	12	24	29	4	10	23	6	9	399	443	434	362	446	460	394	99	88	93	91	115	118	101	0.988901	0.863509	1.22092
ENSG00000225300	3	5	0	3	1	0	0	2	5	0	3	3	2	0	0	2	0	1	11	10	6	11	9	0	1	11	10	2	4	3	2	14	0	1	0	0	0	0	0	1	0	0	1	0	0	0	0.0494369	0.0929319	0
ENSG00000223842	6	5	4	0	4	5	1	0	6	3	1	0	4	0	1	0	2	0	5	10	8	11	12	5	6	0	2	0	4	3	0	0	6	3	3	2	6	5	4	3	6	3	3	2	14	3	0.172107	0.161764	0.116329
ENSG00000162753	0	0	0	0	0	0	0	0	0	0	2	2	1	0	0	2	1	1	2	0	1	0	2	0	0	0	0	0	0	0	0	0	6	0	1	0	0	2	2	0	0	0	0	0	0	0	0	0	0
ENSG00000264343	2	11	5	4	5	14	2	0	5	6	0	3	3	0	0	0	4	0	32	16	25	14	24	26	25	18	18	16	16	29	6	12	0	4	3	8	4	9	8	16	14	7	7	3	24	17	0.0218456	0.135517	0.0553712
ENSG00000228247	0	2	0	2	1	0	4	0	0	0	1	4	0	0	1	1	0	0	1	0	0	0	0	0	0	0	1	0	0	0	0	1	0	0	2	0	1	3	0	2	5	2	0	1	0	2	0	0.315405	0
ENSG00000213033	0	0	0	0	0	0	0	1	0	2	0	2	2	3	2	0	1	3	0	0	1	0	0	0	1	7	0	2	2	13	3	0	2	0	0	0	1	2	1	4	2	2	0	4	4	5	0	0	0
ENSG00000231424	0	0	0	0	0	0	0	0	0	0	0	0	0	1	0	1	0	4	0	2	0	0	0	0	0	0	0	5	2	3	4	0	0	0	0	0	0	0	0	0	0	2	0	0	0	0	0	0	0
ENSG00000143355	0	0	0	0	0	0	0	0	0	0	0	0	0	0	0	0	0	0	0	0	0	0	0	0	0	6	0	0	0	0	1	0	0	0	0	0	0	0	0	0	0	2	0	0	0	0	0	0	0
ENSG00000287177	0	0	0	0	0	0	0	0	0	0	0	0	0	0	0	0	0	0	0	0	0	0	0	0	0	0	0	0	0	2	0	0	0	0	0	0	0	0	0	0	0	0	0	0	0	0	0	0	0
ENSG00000237193	0	0	0	0	0	0	0	0	0	0	0	0	0	0	0	0	0	0	0	0	0	0	0	0	0	1	0	0	0	0	0	0	0	0	0	0	0	0	0	0	0	0	0	0	0	0	0	0	0
ENSG00000272645	78	40	51	61	61	68	79	72	78	87	77	88	37	38	37	40	35	52	51	42	60	80	46	36	21	93	80	70	78	102	38	46	51	30	38	49	39	56	34	159	239	198	161	190	212	172	0.607793	0.351549	0.402913
ENSG00000117597	1063	943	1032	874	1121	1067	826	800	879	1017	967	985	769	789	895	722	862	909	864	813	945	914	1031	649	555	838	803	584	834	841	545	639	1258	1309	1304	1329	1336	1192	1129	882	1108	1045	846	1012	1071	1176	3.29782	3.29967	3.24603
ENSG00000223490	1	4	0	5	0	3	0	7	0	0	1	2	0	0	0	0	0	0	4	6	0	3	5	2	4	15	12	7	18	12	12	12	0	0	2	0	0	1	0	15	12	14	10	22	20	6	0.0807469	0.364293	0
ENSG00000121644	584	452	516	462	576	535	413	451	469	575	536	468	733	715	855	697	859	910	319	300	276	253	323	198	208	241	326	197	232	252	159	182	401	374	346	348	344	363	343	313	461	464	355	396	374	426	3.82141	3.33591	3.42326
ENSG00000174502	0	0	0	0	0	0	0	0	0	0	0	0	0	0	0	0	0	0	1	1	1	0	2	1	0	0	0	0	0	0	0	0	0	2	2	0	0	0	2	0	0	0	0	0	0	0	0	0	0
ENSG00000158715	0	5	2	2	3	4	8	0	8	4	5	0	2	0	3	0	2	2	0	0	0	1	4	0	0	9	4	4	4	4	0	2	13	3	4	12	12	5	4	0	0	0	4	0	0	0	0	0.0485465	0.0174555
ENSG00000143195	3	3	2	3	3	7	6	4	0	6	8	6	9	12	8	4	3	15	38	65	69	37	61	24	25	73	46	51	54	52	27	30	21	20	22	25	14	17	25	7	8	8	0	12	11	8	0.00694796	0.0078365	0.00469619
ENSG00000162849	2	4	0	7	2	4	5	7	4	8	11	6	0	0	0	0	0	6	34	21	18	19	21	14	10	6	22	3	5	10	2	9	18	14	12	13	18	19	15	38	54	75	47	19	28	38	0.00448469	0.0101164	0
ENSG00000233562	0	0	0	0	0	0	0	0	0	0	0	0	0	0	0	0	0	0	0	0	0	0	2	0	0	0	0	0	0	0	0	0	0	0	0	0	0	0	0	0	0	0	0	0	0	0	0	0	0
ENSG00000224536	50	55	63	51	93	54	56	68	63	55	73	71	42	58	57	68	99	92	15	18	16	16	15	6	14	13	20	14	14	28	16	14	41	49	33	33	30	38	42	52	71	43	49	51	37	76	1.06526	1.32164	1.36084
ENSG00000233396	0	3	2	0	0	0	7	7	2	7	4	4	0	0	0	0	2	12	0	0	0	0	0	0	2	0	2	0	2	6	2	0	4	2	4	2	2	2	4	8	13	10	12	8	5	2	0	0.0236862	0.0141944
ENSG00000227941	0	0	0	0	0	0	0	0	0	0	0	0	0	2	0	3	2	0	3	2	5	3	2	4	3	0	0	0	0	0	0	0	0	0	0	0	0	0	0	0	1	0	0	0	0	0	0	0	0
ENSG00000232824	2	4	8	4	4	6	5	3	2	6	3	2	0	0	0	0	0	0	24	21	29	7	15	10	13	18	20	12	29	13	17	11	11	9	9	4	5	5	5	5	2	7	6	8	1	15	0.158327	0.35715	0.642089
ENSG00000273416	13	4	14	18	6	16	4	11	24	23	16	14	2	2	11	2	6	7	40	24	49	29	32	24	25	19	17	3	10	21	10	8	74	89	94	87	102	51	62	36	34	35	43	22	18	36	0.976474	0.338877	1.06617
ENSG00000229930	1	0	3	0	2	3	0	1	0	0	0	1	2	0	0	0	3	2	2	8	5	3	10	5	4	5	4	2	3	3	5	3	1	0	0	3	3	1	2	4	8	4	4	3	3	10	0.131296	0	0.399348
ENSG00000234142	22	22	24	15	12	22	11	19	21	21	6	13	35	60	43	37	29	32	31	13	11	9	13	18	6	6	11	8	6	15	5	4	4	4	4	4	2	10	3	22	37	26	25	30	11	24	0.350381	0.39519	0.387533
ENSG00000282111	1	2	0	0	1	6	0	0	2	0	0	1	0	0	0	0	0	0	0	0	0	0	0	0	2	2	0	1	4	2	0	2	0	0	0	0	0	0	0	1	4	0	4	2	0	4	0.0490118	0.110559	0
ENSG00000233410	0	0	0	0	0	0	0	0	0	0	0	0	0	0	0	0	0	0	0	0	0	0	0	0	0	0	0	0	2	0	0	0	0	0	0	0	0	0	0	0	0	0	0	0	0	0	0	0	0
ENSG00000236021	3	8	9	4	6	10	4	7	9	12	8	5	0	1	5	3	0	0	4	6	4	3	1	4	0	0	2	4	5	9	4	0	1	4	0	0	1	0	0	3	17	14	16	12	9	12	0.0289243	0.0869953	0.0879758
ENSG00000067533	849	768	908	687	935	779	1012	847	952	1006	1016	845	1118	1028	1157	1138	1230	1411	1421	1335	1486	1408	1462	928	1033	1990	1781	1197	1707	1734	1076	1137	1003	1245	1150	1113	1302	1155	1133	1197	1731	1591	1220	1410	1485	1619	3.48123	3.55182	3.77477
ENSG00000133055	49	49	65	53	54	83	74	72	48	74	53	66	7	5	18	12	12	6	0	0	0	0	0	0	0	0	1	0	0	2	3	1	3	2	4	2	11	3	3	13	6	6	2	4	2	5	0.870539	0.981868	1.17081
ENSG00000228955	12	15	17	4	5	14	20	17	29	28	22	20	5	7	8	7	11	11	30	25	35	33	43	21	11	52	58	44	48	57	26	32	39	76	36	57	49	66	64	37	74	54	32	46	50	50	1.74588	2.46144	2.50762
ENSG00000196071	0	0	0	4	0	0	12	8	16	8	12	12	2	0	0	0	0	0	4	9	4	0	2	2	0	33	12	8	12	18	10	14	0	0	0	0	0	0	0	0	0	0	0	0	0	0	0	0	0
ENSG00000232059	0	0	0	0	0	0	1	2	2	2	0	0	0	0	0	0	0	0	0	0	0	0	0	0	2	0	1	0	0	0	0	0	0	0	0	0	0	0	0	0	2	2	2	2	1	7	0	0	0
ENSG00000270443	0	0	0	0	0	0	0	0	0	0	0	0	0	0	0	0	0	0	0	0	0	0	0	0	0	0	0	0	0	0	0	0	0	0	0	0	0	0	0	0	0	0	0	0	0	0	0	0	0
ENSG00000116209	32922	29432	32929	26421	34402	31970	27310	25783	28100	30701	30710	28813	38113	35687	47450	40081	45029	49441	7609	7910	8695	7628	8564	5635	5699	9103	8591	6093	8472	8690	5927	6926	13274	14331	13595	14425	15121	13007	12927	12511	16136	15330	13239	14702	16204	18024	116.225	117.192	117.861
ENSG00000276563	0	0	0	0	3	0	2	4	2	2	2	2	0	0	0	0	0	3	0	3	0	1	0	4	0	0	0	0	2	0	3	0	0	0	0	0	0	0	0	0	0	0	0	0	0	0	0	0	0
ENSG00000271811	0	0	0	0	0	0	0	0	0	0	0	0	4	0	0	0	3	2	0	0	0	0	0	0	0	0	0	0	0	0	0	0	0	0	0	0	0	0	0	0	0	0	0	0	0	0	0	0	0
ENSG00000235492	0	0	0	0	0	0	0	0	0	0	0	0	0	0	0	0	0	0	0	0	0	0	0	0	0	0	0	0	0	0	0	0	0	0	0	0	0	0	0	0	0	0	0	0	0	0	0	0	0
ENSG00000143643	210	153	176	115	186	175	130	108	149	196	207	182	146	163	158	142	188	179	245	270	308	271	331	212	181	271	319	178	221	315	254	217	487	488	448	468	519	501	525	330	427	381	286	400	377	508	1.61034	1.32329	1.36833
ENSG00000287808	0	9	19	3	4	9	0	1	2	6	1	2	10	5	5	8	4	6	16	27	16	24	22	13	22	13	18	12	17	20	6	12	11	15	17	11	6	10	23	21	32	12	10	8	28	18	0	0.327864	0.622184
ENSG00000235736	0	1	0	0	1	0	0	0	0	0	0	0	2	4	2	0	0	0	0	0	0	0	0	0	0	0	0	0	0	0	0	0	0	0	0	0	0	0	0	0	0	0	0	0	0	0	0	0.0871514	0
ENSG00000229840	0	0	1	0	0	0	0	0	0	0	0	0	0	0	1	0	0	1	1	0	0	0	0	0	0	0	0	0	0	0	0	0	0	0	0	0	0	0	0	0	0	0	0	0	0	0	0	0	0.0777828
ENSG00000116161	10868	9642	10541	8942	11754	10484	8837	8477	8982	9855	9722	9477	10340	10290	12739	11022	12208	13707	3030	2976	3367	2787	3360	2128	2096	3338	3339	2100	2954	3089	2221	2475	14587	15683	14866	15665	16519	14623	14456	9315	12974	12260	9668	10963	12318	13996	76.1273	76.1768	74.8604
ENSG00000143847	10	4	10	0	2	4	4	16	6	5	6	11	0	0	0	0	0	0	9	5	10	10	13	3	4	5	13	10	9	10	6	7	6	2	0	4	2	0	0	4	1	4	4	0	5	5	0.0332737	0.0150116	0.033735
ENSG00000286210	0	0	0	0	0	0	0	2	0	0	0	1	0	0	0	0	0	0	0	0	0	0	0	0	0	2	0	2	0	0	0	0	0	0	0	0	0	0	0	0	0	0	0	0	0	0	0	0	0
ENSG00000223745	940	823	864	745	880	869	1103	1070	1162	1267	1343	1309	618	617	737	707	721	761	3295	3627	3945	3330	3885	2381	2383	3057	2975	1935	3000	2970	2086	2099	716	823	797	862	862	728	621	3154	4273	4115	3233	3790	4099	4457	4.83145	4.77106	4.50239
ENSG00000225063	0	4	0	0	4	4	0	0	0	0	0	0	0	0	0	0	0	0	0	0	0	2	2	0	0	0	0	0	0	0	0	0	0	0	0	0	0	0	0	0	0	0	0	0	0	0	0	0.212416	0
ENSG00000260698	13	9	16	10	10	16	16	4	10	8	19	20	8	12	8	10	8	11	7	13	26	20	26	6	26	7	12	1	12	12	2	6	34	27	39	26	36	25	32	8	17	11	7	15	14	24	0.14147	0.110466	0.176531
ENSG00000277007	6	14	9	6	29	4	19	4	12	20	11	14	11	9	10	11	12	14	2	0	4	0	0	0	0	14	12	6	10	10	12	10	14	12	11	14	14	13	17	42	69	50	56	57	84	57	0.0741364	0.195107	0.112746
ENSG00000173627	0	2	0	0	2	1	0	2	1	2	1	2	0	0	0	0	0	0	1	0	6	1	5	4	1	5	11	4	1	4	0	3	5	2	4	1	4	0	0	1	6	0	4	2	2	2	0	0.0261893	0
ENSG00000067704	1719	1547	1740	1399	2081	1706	1473	1469	1447	1553	1689	1586	1430	1509	1686	1588	1749	1829	489	523	622	470	505	398	371	775	676	476	568	651	413	419	1428	1590	1609	1675	1701	1457	1414	1231	1678	1452	1332	1411	1369	1533	13.4272	13.6291	13.7797
ENSG00000229016	0	0	0	0	0	0	0	0	0	0	0	0	0	0	0	0	0	0	0	2	0	0	0	0	0	0	0	0	0	0	0	0	0	0	0	0	0	0	0	0	0	0	0	0	0	0	0	0	0
ENSG00000077157	230	216	224	131	269	220	172	207	241	215	227	221	157	118	140	130	114	131	206	171	233	251	202	140	157	180	143	120	150	159	111	84	273	346	310	356	335	293	264	253	376	316	319	341	323	408	0.35259	0.373474	0.348153
ENSG00000152104	30	32	33	25	35	40	52	69	47	60	45	46	9	6	16	5	7	14	26	26	30	13	26	28	12	40	21	18	18	28	33	9	25	29	38	11	32	27	12	58	42	53	57	59	48	61	0.0516725	0.062166	0.0576278
ENSG00000236975	0	0	0	0	0	0	0	0	0	0	2	0	0	0	0	0	0	0	9	3	10	7	6	3	3	0	0	0	0	0	0	0	0	0	0	0	0	0	0	2	0	2	3	2	1	0	0	0	0
ENSG00000232192	0	0	0	0	0	0	0	0	0	0	0	0	0	0	0	0	0	0	0	0	0	0	0	0	0	0	2	0	0	0	0	0	0	0	0	0	0	0	0	0	0	0	0	0	0	0	0	0	0
ENSG00000162909	1203	998	1188	951	1274	1127	985	964	1038	1085	1139	988	1105	1090	1335	1274	1473	1568	2764	2748	3085	2653	3096	1932	1834	3480	3122	2233	3081	3310	1836	2187	1122	1467	1378	1433	1477	1271	1309	2411	3367	3100	2624	2971	2871	3307	4.52597	4.23488	4.5315
ENSG00000232261	0	0	0	0	0	0	0	0	0	2	0	0	0	0	0	0	0	0	0	0	0	0	0	0	0	7	0	1	6	2	0	2	0	0	0	0	0	0	0	0	0	0	0	0	0	0	0	0	0
ENSG00000122180	0	0	0	0	0	0	0	0	0	0	0	0	1	0	0	0	0	0	0	0	0	0	0	0	0	0	0	0	0	0	0	0	0	0	0	0	0	0	0	0	0	0	0	0	0	0	0	0	0
ENSG00000286541	0	0	0	2	2	0	0	0	0	0	0	0	0	0	0	0	0	0	0	0	0	0	0	0	0	0	0	0	0	0	0	0	0	0	0	0	0	0	0	0	0	0	0	0	0	0	0	0	0
ENSG00000117650	27	22	35	18	18	19	26	23	26	39	33	22	5	4	4	3	4	4	12	16	10	16	5	1	7	13	4	15	14	6	6	5	222	221	266	245	241	182	194	35	59	45	31	43	49	49	0.281766	0.258948	0.370316
ENSG00000235021	0	0	0	0	0	0	0	0	0	0	0	0	0	0	0	0	0	0	0	0	0	0	1	0	0	3	4	2	0	2	0	0	0	0	0	0	0	0	0	1	0	1	2	0	0	1	0	0	0
ENSG00000203724	47	36	52	42	53	36	37	29	28	36	31	53	27	30	48	41	39	41	2	5	2	6	7	2	0	14	10	8	18	18	4	8	25	22	17	16	20	14	10	6	17	12	13	17	6	13	2.41726	2.0883	2.7115
ENSG00000287633	0	0	0	0	0	0	0	0	0	0	0	0	0	0	0	0	0	0	0	0	0	0	0	0	0	0	0	0	0	0	0	0	0	0	0	0	0	0	0	0	0	0	0	0	0	0	0	0	0
ENSG00000226148	0	0	0	0	0	1	10	7	7	12	4	6	0	0	0	0	0	0	8	5	8	3	8	8	4	8	19	4	9	17	6	9	0	0	0	0	0	0	0	2	0	0	2	1	4	1	0	0	0
ENSG00000158764	4	0	2	2	0	2	0	0	0	0	0	0	0	0	0	0	0	0	0	0	0	2	0	0	0	0	0	0	0	0	0	0	0	0	0	0	0	0	0	0	0	0	0	0	0	0	0.0784903	0	0.0397892
ENSG00000223375	0	0	0	0	0	0	0	0	0	0	0	0	0	0	0	0	0	0	0	0	0	0	0	0	0	0	0	0	0	0	2	0	0	0	0	0	0	0	0	0	0	0	0	0	0	0	0	0	0
ENSG00000231507	103	100	119	63	109	95	71	78	81	91	100	85	59	46	85	43	66	95	154	124	171	112	156	111	83	186	195	119	172	201	115	140	60	51	48	106	67	54	66	8	33	33	25	36	49	25	2.10156	2.30128	2.46168
ENSG00000230714	0	0	0	0	0	0	0	0	0	0	0	0	0	0	0	0	0	0	0	0	0	0	0	0	0	0	0	0	0	0	0	0	0	0	0	0	0	0	0	0	0	0	0	0	0	2	0	0	0
ENSG00000287989	12	14	6	12	29	9	4	0	4	0	5	4	15	34	29	26	21	23	17	14	25	11	7	19	11	20	17	12	20	27	16	11	62	73	53	72	82	59	74	11	10	15	15	9	7	11	0.160358	0.21101	0.0812906
ENSG00000260855	0	0	2	0	0	0	0	1	2	0	0	0	0	0	0	0	0	0	6	1	0	5	6	6	1	22	7	4	7	13	8	2	0	0	0	0	0	0	0	0	2	4	6	4	4	2	0	0	0.0188632
ENSG00000188783	0	0	0	0	0	0	0	0	0	0	0	0	0	0	0	0	0	0	1	0	0	1	1	0	0	0	0	0	0	0	0	0	0	3	0	0	1	5	0	0	0	0	0	0	0	0	0	0	0
ENSG00000236206	0	0	0	0	0	0	0	6	0	0	2	0	0	0	0	0	2	0	0	10	1	4	0	0	2	0	0	0	0	0	0	0	0	0	0	0	0	0	0	2	0	0	0	3	2	1	0	0	0
ENSG00000284188	0	0	0	0	0	0	0	0	0	0	0	0	0	0	2	0	0	0	0	0	0	0	0	0	0	0	0	0	0	0	0	0	0	0	0	0	0	0	0	0	0	0	0	0	0	0	0	0	0
ENSG00000168118	498	440	472	381	597	437	318	316	386	316	397	306	561	518	588	588	741	686	872	858	1071	936	935	616	567	1661	1608	891	1375	1381	925	1077	617	819	743	696	709	656	602	313	430	407	319	336	382	478	4.85945	4.84257	4.6696
ENSG00000181101	0	0	1	1	1	1	0	0	0	2	0	1	1	0	1	0	1	1	0	1	0	2	0	2	0	0	0	1	1	1	2	0	0	0	2	0	1	1	2	0	3	2	0	0	0	2	0	0	0.0320103
ENSG00000173726	2016	1834	2057	1645	2264	1895	1709	1560	1615	1829	1873	1716	1615	1600	2111	1790	1944	2122	1411	1329	1707	1406	1673	1071	1117	2005	1808	1138	1739	1770	1134	1361	1587	1937	1870	1840	1948	1707	1704	1516	2056	2023	1455	1886	1949	2390	18.9396	19.4332	19.5927
ENSG00000282852	0	0	0	0	0	0	2	0	0	2	3	0	0	0	0	0	0	0	5	6	2	3	0	0	0	3	1	0	0	0	2	0	6	3	10	12	6	0	5	0	4	1	3	1	0	11	0	0	0
ENSG00000228110	16	13	24	28	21	23	10	25	13	19	21	28	24	21	23	31	35	11	5	4	9	3	15	8	4	11	5	1	6	6	5	5	14	27	18	17	31	8	13	16	25	17	15	24	26	25	0.459769	0.421335	0.699215
ENSG00000224687	25	18	39	20	21	14	6	1	0	13	6	5	37	19	36	25	39	29	0	1	0	0	0	0	0	0	0	0	0	0	0	0	0	0	0	0	0	0	0	0	0	0	0	0	0	0	0.253363	0.205751	0.400727
ENSG00000223881	3	0	0	0	0	4	5	2	1	0	0	0	6	0	3	0	4	0	0	5	9	4	0	2	2	9	4	2	2	4	5	4	0	0	1	2	0	0	0	5	12	7	11	7	18	3	0.266932	0	0
ENSG00000270188	0	0	0	0	0	0	0	0	0	0	0	0	0	0	0	0	0	0	0	0	0	0	0	2	0	0	0	0	0	0	0	0	0	0	0	0	0	0	0	0	0	0	0	0	0	0	0	0	0
ENSG00000152382	1815	1508	1703	1454	1869	1591	1519	1443	1496	1666	1824	1618	1092	1030	1213	1051	1196	1356	2000	1969	2247	1955	2290	1357	1312	2261	2241	1519	2158	2326	1336	1420	1786	2071	1990	1935	2127	1832	1820	2031	3036	2702	2358	2637	2511	3025	20.2146	18.9432	19.2301
ENSG00000143839	0	0	0	0	0	0	0	0	0	0	0	0	0	0	0	0	0	0	0	0	0	0	2	0	0	0	0	0	0	2	3	0	4	3	3	12	1	0	0	0	0	0	0	0	0	0	0	0	0
ENSG00000227243	0	0	0	0	0	0	0	0	0	0	0	0	0	0	0	0	0	0	0	0	0	0	0	0	0	0	0	0	0	0	0	0	0	5	2	2	2	5	1	0	0	0	0	0	0	0	0	0	0
ENSG00000261024	11	2	16	10	5	15	18	12	23	10	24	17	5	2	0	0	5	0	44	37	41	77	58	37	22	47	47	30	48	65	44	28	1	0	0	1	1	1	0	19	24	11	16	12	19	14	0.294844	0.0604636	0.434809
ENSG00000187080	0	0	2	0	0	1	0	0	0	0	0	0	0	2	4	0	3	7	0	0	0	0	0	0	0	0	0	0	0	0	2	0	9	8	20	10	4	6	11	13	9	22	14	19	14	17	0	0	0.0567531
ENSG00000232134	2	2	4	7	0	0	1	0	0	1	4	1	1	1	0	1	0	2	4	1	5	7	4	8	2	4	16	7	2	5	5	5	3	0	4	3	0	0	0	7	5	7	8	13	6	9	0.166489	0.18778	0.337593
ENSG00000230547	0	0	0	0	0	0	0	0	1	0	0	2	0	0	0	0	0	0	0	0	0	0	0	0	0	0	0	0	0	0	0	0	0	0	0	0	0	0	0	0	0	0	0	0	0	0	0	0	0
ENSG00000173409	877	722	710	717	857	769	748	716	653	725	721	704	1050	977	1238	1119	1343	1443	225	333	295	275	290	182	165	316	367	210	322	374	218	259	715	840	788	831	867	785	792	936	1402	1381	1068	1301	1311	1451	13.3299	12.3774	10.9412
ENSG00000232480	0	0	0	0	0	0	0	0	0	0	0	0	0	0	0	0	0	0	0	0	0	0	1	0	0	0	0	0	0	0	0	0	0	0	0	0	0	0	0	0	1	2	0	0	0	0	0	0	0
ENSG00000229703	0	0	0	0	0	0	4	0	1	0	2	6	0	0	0	0	0	0	0	0	0	0	0	0	0	0	0	0	0	0	0	0	0	2	0	0	0	0	1	0	0	0	0	0	0	0	0	0	0
ENSG00000176754	0	0	2	0	0	0	0	0	0	0	0	0	0	0	0	0	0	0	0	0	0	2	1	0	2	0	0	0	0	0	0	0	0	0	0	0	0	0	0	0	0	0	0	0	0	0	0	0	0.0329608
ENSG00000232309	0	0	0	0	0	0	0	0	0	0	0	0	0	0	0	0	0	0	0	0	0	0	1	0	0	0	0	0	0	0	0	0	0	0	0	0	0	0	0	0	0	0	0	0	0	0	0	0	0
ENSG00000227953	11	4	4	14	5	7	7	9	4	9	2	4	8	8	17	6	18	29	3	3	2	9	7	11	5	21	3	17	12	12	5	13	0	2	0	0	0	0	1	1	1	1	1	1	2	2	0.0744835	0.0305487	0.0274604
ENSG00000143514	725	579	674	535	751	605	717	613	621	693	760	723	604	520	680	616	638	749	866	888	1008	801	991	602	480	1225	1080	682	1065	1157	684	703	573	685	638	674	691	558	603	493	688	662	551	570	550	729	3.91648	3.52777	3.69145
ENSG00000232215	0	0	0	1	0	0	0	0	0	0	0	0	0	0	0	0	0	0	0	0	0	0	0	0	0	0	0	0	0	0	0	0	0	0	0	0	0	0	0	0	0	0	0	1	0	0	0	0	0
ENSG00000251520	2	1	0	2	0	1	0	0	0	0	0	0	1	0	0	0	0	0	4	0	4	0	0	0	0	1	0	1	0	1	2	1	0	3	0	0	0	3	0	0	1	0	0	0	0	0	0.120293	0.0678385	0
ENSG00000143469	0	0	0	0	0	0	0	0	0	2	0	0	0	0	0	0	0	0	0	0	0	0	0	0	2	2	8	2	2	6	4	0	0	0	0	0	0	0	0	0	3	2	0	2	0	4	0	0	0
ENSG00000135829	1674	1542	1684	1410	1690	1570	1700	1693	1667	1839	1880	1783	1263	1213	1500	1335	1499	1570	2182	2166	2414	2130	2421	1472	1397	1913	1805	1141	1810	1882	1067	1226	2391	2672	2443	2587	2804	2440	2284	1883	2515	2463	2057	2312	2282	2546	9.1672	9.52424	9.34981
ENSG00000134717	6998	6180	7210	5669	7419	6627	6021	5872	6263	6672	7242	6427	8056	7911	9946	8391	9336	10514	3554	3485	3798	3351	4007	2606	2527	4336	3801	2588	3786	3828	2462	2672	5214	5774	5525	5215	6120	5277	5099	4981	6989	6250	5203	5832	6414	7610	38.0005	37.8502	39.6945
ENSG00000232989	0	0	0	0	0	0	0	0	0	0	0	0	0	0	0	0	0	0	0	0	0	2	2	0	0	2	1	0	4	2	1	0	0	0	0	0	0	0	0	0	0	0	0	0	0	0	0	0	0
ENSG00000116668	526	539	519	438	625	551	581	428	563	530	584	590	456	497	651	543	607	638	261	260	271	236	339	164	155	271	221	135	217	253	211	165	360	303	319	384	418	313	364	318	413	438	355	402	402	477	4.17629	4.82679	4.17784
ENSG00000188610	4	8	2	4	6	18	16	18	14	14	16	15	2	2	0	0	2	6	27	29	45	8	32	12	11	73	88	41	84	74	24	37	70	101	50	40	81	58	40	2	12	4	12	6	24	4	0.0425965	0.0960878	0.0215935
ENSG00000143756	1597	1348	1616	1229	1591	1502	1446	1334	1500	1545	1779	1582	1284	1320	1711	1428	1602	1693	927	968	1099	977	1081	668	595	1171	1113	797	996	1171	734	903	1119	1342	1122	1174	1316	1104	1090	909	1291	1215	985	1022	1145	1236	8.56829	8.15726	8.79044
ENSG00000278180	0	0	0	0	0	0	0	0	0	0	0	0	0	0	0	0	0	0	0	0	0	0	0	0	0	0	0	0	0	0	0	1	0	0	0	0	0	0	0	0	0	0	0	0	0	0	0	0	0
ENSG00000143702	1151	1172	1279	1077	1223	1181	1418	1228	1282	1443	1487	1376	1212	1185	1536	1427	1455	1670	670	759	753	644	795	452	477	885	854	558	869	813	533	673	931	1079	1004	1129	1027	1039	966	824	1115	1057	920	1051	1045	1248	3.39847	3.90302	3.82876
ENSG00000232341	0	0	0	2	0	0	0	0	0	0	0	0	0	0	0	0	0	0	0	0	0	0	0	0	0	0	0	0	0	0	0	0	0	0	0	0	0	0	0	0	0	0	0	0	0	0	0	0	0
ENSG00000287676	3	0	0	0	0	0	1	0	0	1	2	3	0	0	0	0	0	0	1	0	2	0	0	3	3	2	4	2	6	5	4	3	4	4	6	2	6	0	2	0	3	8	1	2	1	7	0.135519	0	0
ENSG00000236792	6	9	6	3	16	13	17	2	15	9	14	15	4	11	8	10	5	19	2	10	0	5	7	2	5	7	7	3	8	4	7	2	15	6	11	16	12	10	8	16	5	9	12	15	2	5	0.437455	0.740099	0.44352
ENSG00000231057	6	1	2	2	2	8	6	4	9	10	3	4	3	0	2	9	3	1	12	11	12	5	8	6	2	4	3	3	4	2	4	0	0	0	0	0	0	0	0	0	7	13	4	6	8	5	0.0786177	0.0147786	0.0265692
ENSG00000185860	10	2	2	2	0	0	2	2	0	2	6	0	0	0	0	0	0	0	18	19	25	19	25	14	11	8	8	4	10	7	6	8	12	18	8	10	23	13	17	4	8	12	0	6	4	0	0.074835	0.016881	0.0151745
ENSG00000232860	10	6	10	5	13	11	10	8	13	10	5	10	14	13	2	12	20	13	44	32	52	36	47	51	36	110	50	49	56	102	61	55	4	16	7	8	7	4	5	4	1	9	2	7	6	3	0.0954737	0.06461	0.0967974
ENSG00000143207	631	564	693	514	658	596	572	498	576	663	664	573	846	733	918	795	1065	1023	663	700	668	679	729	459	435	858	817	539	698	780	425	384	719	821	777	817	817	748	658	627	766	734	649	726	803	833	4.87923	4.91887	5.43293
ENSG00000122176	0	0	0	0	0	0	0	2	0	2	0	0	0	0	0	0	0	0	0	2	0	0	0	0	0	1	0	0	1	0	2	0	2	0	2	0	2	0	2	0	2	0	2	0	0	0	0	0	0
ENSG00000229120	0	0	0	0	0	0	2	0	2	0	0	0	0	0	0	0	2	0	0	0	0	0	0	0	0	0	0	0	0	1	0	0	0	0	0	0	0	0	0	0	0	0	0	0	0	0	0	0	0
ENSG00000237492	2	0	0	0	2	1	1	0	2	0	0	0	1	1	0	2	4	2	0	4	2	0	4	2	2	0	0	0	0	2	0	0	0	0	0	0	0	0	0	0	0	0	0	3	0	0	0.0707531	0	0
ENSG00000286142	0	0	0	0	0	0	0	0	0	0	0	0	0	0	0	0	0	0	0	0	1	0	0	0	0	0	0	0	3	2	0	0	0	0	0	0	0	0	0	0	0	0	0	0	0	0	0	0	0
ENSG00000230404	0	0	0	0	0	0	0	0	0	0	0	0	0	0	0	0	0	0	0	0	0	0	0	0	0	0	0	0	0	0	0	0	0	0	0	0	0	0	0	0	0	0	0	0	0	0	0	0	0
ENSG00000213036	4	3	4	5	6	5	3	4	4	7	3	2	6	2	8	7	2	4	2	4	2	1	3	4	5	1	2	2	0	7	1	3	0	4	4	4	5	1	2	0	5	3	2	0	2	2	0.224687	0.190066	0.227802
ENSG00000117507	0	0	0	0	0	0	0	0	0	0	0	0	0	0	0	0	0	0	0	0	0	0	0	0	0	5	2	2	2	0	1	7	0	0	0	0	0	0	0	0	3	3	3	0	0	2	0	0	0
ENSG00000240021	1	0	0	1	0	0	5	6	2	0	0	1	2	0	0	0	0	0	0	0	0	0	0	0	0	0	0	0	0	0	2	0	0	0	0	0	0	0	0	0	0	0	0	0	0	0	0.00806059	0	0
ENSG00000227230	10	0	1	2	5	9	8	5	5	8	3	11	17	14	7	3	15	13	0	9	2	0	1	0	2	9	2	1	5	2	6	5	6	4	5	2	7	5	2	2	7	5	4	2	5	5	0.4654	0	0.0471852
ENSG00000236230	0	0	0	0	0	0	0	0	0	0	0	0	0	0	0	0	0	0	0	0	1	0	0	0	0	0	0	0	0	0	0	0	6	8	0	0	10	2	2	0	0	0	0	0	0	0	0	0	0
ENSG00000026751	16642	14791	15940	13430	17353	16238	14429	13575	14469	15549	16243	14911	7717	7431	9341	8370	9542	10197	1919	1882	2097	1977	2169	1254	1258	4298	4108	2724	3847	4137	2489	2475	2637	2980	2596	2914	3139	2554	2569	1306	1559	1516	1251	1442	1526	1755	111.218	111.489	108.003
ENSG00000150681	0	3	0	0	4	0	12	30	14	11	10	2	22	9	18	31	13	34	7067	6923	7688	6792	7862	5319	4914	7976	7285	5074	7109	7501	4890	4336	332	302	322	321	328	288	320	423	594	472	495	496	509	595	0	0.0390175	0
ENSG00000116906	3082	2767	2891	2514	3213	3012	2765	2582	2574	2959	3038	2814	2023	1708	2307	2087	2362	2474	912	1051	1164	945	1155	689	670	1129	1064	699	1068	1069	683	912	2106	2144	2091	2111	2234	2030	2025	1866	2613	2394	1994	2300	2524	2709	30.5259	30.9107	29.0311
ENSG00000092969	4	4	2	4	10	5	0	0	0	0	2	0	6	7	6	11	13	16	6	18	3	2	13	0	6	6	8	5	8	6	8	9	0	0	0	2	0	0	0	0	1	0	0	0	0	0	0.0213546	0.0240855	0.0108253
ENSG00000163545	45	53	48	37	44	58	69	43	55	77	83	64	29	35	33	20	64	51	151	183	191	149	146	99	91	226	175	100	180	203	114	99	121	166	150	115	139	103	93	414	634	602	429	525	488	634	0.428618	0.569376	0.463531
ENSG00000157181	1700	1738	1879	1506	1798	1754	1582	1417	1679	1855	1949	1768	2205	2179	2785	2283	2682	3008	867	836	954	824	996	648	702	900	827	552	792	826	556	604	1252	1395	1324	1251	1396	1265	1225	916	1276	1138	984	1209	1189	1370	13.4809	15.5448	15.107
ENSG00000250762	7	1	10	7	10	10	5	4	0	6	1	7	1	7	4	8	13	4	0	3	2	2	8	5	8	2	4	4	0	2	3	1	1	2	4	0	0	2	0	0	1	0	1	2	1	1	0.849968	0.136952	1.23107
ENSG00000143153	10831	9910	10899	8766	11599	10644	10437	10106	10461	11732	11599	11056	11008	10590	13279	12021	13121	14389	944	947	1044	898	947	665	611	732	752	485	721	771	393	454	1654	1768	1761	1738	1916	1666	1612	513	714	613	539	554	598	663	122.104	126.009	124.574
ENSG00000236720	0	0	0	0	0	0	0	0	0	0	0	0	0	0	0	0	0	0	0	0	0	0	0	0	0	0	0	0	0	0	0	0	0	0	0	0	0	0	0	0	0	0	0	0	0	0	0	0	0
ENSG00000227421	0	3	0	2	0	1	2	1	0	0	3	0	8	4	5	14	15	12	3	3	6	0	2	2	2	4	0	0	2	0	2	0	4	2	1	5	0	3	3	1	0	9	1	2	4	0	0	0.0998975	0
ENSG00000120332	0	0	0	0	0	0	6	2	1	0	0	3	0	0	0	0	0	0	4	1	5	0	3	0	3	4	4	0	8	1	2	3	0	0	0	0	0	0	0	0	0	2	0	1	0	2	0	0	0
ENSG00000227240	49	44	59	35	49	36	47	60	53	52	49	57	28	31	32	43	48	49	4	18	16	17	20	14	6	18	13	19	21	14	10	12	90	83	102	112	87	81	76	31	38	41	32	40	59	51	0.992251	1.00495	1.21131
ENSG00000076258	188	192	175	171	195	178	160	123	169	157	154	148	175	120	206	194	202	226	36	36	25	20	25	20	28	25	54	21	38	41	26	11	84	102	103	89	73	84	60	58	70	78	73	54	80	87	2.38874	2.75154	2.25438
ENSG00000230461	0	0	0	0	0	0	6	0	4	2	4	0	0	0	0	0	0	0	1	0	0	0	0	0	0	0	0	0	0	0	0	1	0	0	0	0	0	0	0	0	0	0	2	0	0	0	0	0	0
ENSG00000286073	0	0	0	0	0	0	0	0	0	0	0	0	0	0	0	0	0	0	0	0	0	0	0	2	0	0	0	0	0	0	0	0	0	0	0	0	0	0	0	0	0	0	0	0	0	0	0	0	0
ENSG00000231084	12	2	6	1	9	8	1	2	2	1	3	2	1	0	4	2	3	0	0	7	3	0	1	3	4	2	0	0	10	5	2	4	0	0	0	0	0	0	0	0	0	0	0	0	0	0	1.03081	0.193773	0.522551
ENSG00000232085	0	1	0	0	0	0	0	0	0	0	0	0	6	0	0	3	1	2	1	0	0	0	1	1	0	0	0	0	0	0	0	1	0	0	0	0	0	0	0	0	4	0	0	0	0	0	0	0.0746502	0
ENSG00000259788	16	21	24	18	38	21	4	2	21	15	18	17	2	9	10	15	15	11	11	23	18	6	13	9	17	7	8	14	10	12	15	7	3	0	0	5	1	2	3	6	10	12	10	6	15	20	0.477616	0.707038	0.726356
ENSG00000117697	1755	1414	1700	1331	1749	1583	1447	1455	1607	1682	1721	1519	2038	1891	2432	2254	2585	2634	1417	1538	1684	1570	1706	1243	1100	1744	1493	1095	1511	1710	1047	1135	2369	2737	2462	2580	2922	2753	2445	1951	2682	2593	2045	2305	2578	3006	4.08771	3.71465	4.0145
ENSG00000232154	0	0	0	0	0	0	0	0	0	0	0	0	0	0	0	0	0	0	0	0	0	0	0	0	0	0	0	0	0	0	0	0	0	0	0	0	0	0	0	0	0	0	0	0	0	0	0	0	0
ENSG00000162669	0	0	0	0	0	0	0	0	0	0	0	0	6	1	4	8	13	3	8	10	10	21	10	8	8	0	4	0	0	5	4	0	0	1	0	2	1	0	2	0	0	0	0	0	0	0	0	0	0
ENSG00000197067	0	0	0	0	0	0	0	0	1	0	0	0	0	0	0	0	0	0	15	15	13	12	14	4	13	7	5	7	12	11	5	2	0	0	0	0	0	0	0	0	2	0	1	2	0	1	0	0	0
ENSG00000132681	0	0	0	0	0	0	0	0	0	0	0	0	0	0	0	1	0	0	0	10	5	1	2	2	0	6	10	2	4	5	8	3	0	0	0	0	0	0	0	0	0	0	0	0	0	0	0	0	0
ENSG00000225904	0	0	0	0	0	0	0	0	0	0	0	0	0	0	0	0	0	0	0	0	0	0	0	0	2	0	0	0	0	0	0	0	0	0	0	0	0	0	0	0	0	0	0	0	0	0	0	0	0
ENSG00000143641	296	250	260	225	288	256	297	261	301	285	280	303	153	161	179	157	182	196	210	206	230	244	251	128	165	244	254	166	289	265	176	200	163	150	164	148	135	136	113	202	229	222	158	189	180	256	1.23968	1.18093	1.10401
ENSG00000227630	2	0	0	1	0	0	2	2	3	4	1	0	2	12	6	6	0	2	2	0	0	0	0	0	0	0	0	0	2	4	2	2	0	0	2	2	0	6	0	0	0	0	0	0	0	2	0.0127085	0	0
ENSG00000010932	3	2	6	5	6	5	2	9	6	5	5	6	2	4	7	7	12	3	1	0	0	1	0	0	1	6	4	3	4	0	2	2	4	1	1	0	3	4	1	4	0	3	1	5	1	5	0.0269007	0.0202273	0.0545473
ENSG00000282849	13	17	12	8	10	6	15	6	13	28	18	22	4	5	6	4	4	2	6	5	12	5	6	2	1	3	2	0	2	3	2	0	65	57	93	75	83	68	75	0	0	0	0	0	0	0	0.658125	0.970687	0.615923
ENSG00000276520	0	0	0	0	0	0	0	0	0	0	0	0	0	0	0	0	0	0	0	0	0	0	2	0	0	0	0	0	0	0	0	0	0	0	0	0	0	0	0	0	0	0	0	0	0	0	0	0	0
ENSG00000226640	40	33	45	42	43	36	66	54	60	63	68	49	30	48	47	36	62	93	21	13	16	19	9	12	13	10	14	4	11	14	2	3	227	274	225	289	345	269	249	21	24	17	5	29	18	29	3.22182	2.99792	3.6748
ENSG00000010072	1262	1191	1403	1026	1313	1226	1078	1059	1143	1125	1278	1193	989	926	1101	1013	1114	1185	772	932	1001	850	1056	570	601	1105	1008	681	947	990	637	647	965	1120	1096	1054	1141	965	991	734	1068	1023	772	902	935	1064	6.90163	7.34631	7.77911
ENSG00000270711	0	0	0	0	0	0	0	0	0	0	0	0	0	0	0	0	0	0	0	0	0	0	0	0	0	0	0	1	0	0	2	0	0	0	0	0	0	0	0	0	0	0	0	0	0	0	0	0	0
ENSG00000135766	15	11	14	12	13	23	9	21	18	16	13	18	7	11	20	11	16	15	13	26	21	34	16	13	9	8	21	4	22	11	13	16	10	7	19	16	19	15	14	10	13	11	11	13	16	10	0.0900356	0.0744699	0.0851982
ENSG00000232626	13	12	1	10	10	14	3	4	2	4	4	4	2	4	4	6	10	9	4	16	11	6	18	7	2	14	14	8	4	5	0	0	6	5	8	2	2	0	0	0	0	2	0	0	0	2	0.268812	0.279867	0.0209645
ENSG00000279261	1	0	0	0	0	0	0	0	0	0	0	0	0	0	0	0	0	0	2	2	6	4	0	1	2	12	11	6	2	14	12	6	0	1	2	0	0	0	0	0	9	6	6	2	2	10	0.0132481	0	0
ENSG00000215817	68	62	43	40	60	37	55	33	47	48	74	44	34	35	58	41	39	46	37	72	55	68	40	43	28	69	46	63	57	60	31	29	84	87	88	87	78	69	50	58	73	91	53	90	65	106	0.44236	0.454908	0.283606
ENSG00000213051	0	1	9	0	2	0	2	0	1	5	5	4	0	4	5	9	10	7	4	0	4	0	4	0	0	4	6	6	4	4	0	0	0	2	2	4	6	4	10	8	15	10	4	6	2	6	0	0.0407943	0.330032
ENSG00000163534	98	99	109	75	91	109	151	147	148	142	186	166	84	65	78	78	95	98	457	534	500	498	556	307	372	977	961	597	1000	942	584	659	68	71	86	85	79	77	62	318	432	443	321	327	370	465	0.801337	0.913038	0.903639
ENSG00000143816	0	0	0	0	0	0	0	0	0	0	0	0	0	0	0	0	0	0	0	0	0	0	0	0	0	0	0	0	0	0	0	0	0	0	0	0	0	0	0	0	0	0	0	0	0	0	0	0	0
ENSG00000168243	40	31	19	29	28	38	18	8	23	30	23	18	22	28	25	10	17	28	2	4	17	4	2	2	6	42	15	9	17	32	13	10	16	15	14	18	9	18	11	17	20	51	11	24	22	29	0.248739	0.217426	0.119789
ENSG00000237469	0	0	0	0	0	0	0	0	0	0	0	0	0	0	0	0	0	0	0	0	0	0	0	0	0	0	1	0	0	0	0	0	0	0	0	0	0	0	0	0	0	0	0	0	0	0	0	0	0
ENSG00000224939	0	2	0	0	0	0	20	2	16	2	13	6	8	2	4	0	12	4	6	15	30	19	17	6	4	2	20	5	11	23	8	2	6	1	8	4	10	4	3	20	19	7	30	10	16	12	0	0.0320963	0
ENSG00000213057	4	0	4	7	2	3	8	4	6	8	4	15	1	1	7	1	2	7	4	0	3	1	2	0	0	7	6	1	3	10	9	1	6	5	2	4	7	4	7	18	22	12	25	24	14	27	0.0465568	0	0.0472022
ENSG00000116183	6	0	1	2	2	0	0	0	0	0	0	0	0	0	0	0	0	0	0	0	0	0	0	0	2	0	0	0	0	0	0	0	0	0	0	0	0	0	0	0	0	0	0	0	0	0	0.0177368	0	0.00299712
ENSG00000116218	0	0	0	0	0	0	0	0	0	0	0	0	0	0	0	0	0	0	0	0	0	0	0	0	0	0	0	0	0	0	0	0	0	0	0	0	0	0	0	0	0	0	0	0	1	0	0	0	0
ENSG00000226251	0	2	2	0	2	2	3	0	0	2	0	1	8	5	3	15	13	2	23	18	25	19	28	9	16	31	14	12	17	29	7	15	1	11	1	3	1	7	2	2	0	2	0	2	0	0	0	0.0612772	0.0550825
ENSG00000270106	2	3	12	0	4	8	0	0	0	1	0	1	5	6	0	0	2	3	4	7	19	17	6	4	4	1	4	2	0	3	6	2	0	0	0	0	0	0	0	0	2	1	1	0	1	0	0.0153548	0.0259776	0.0934059
ENSG00000232194	0	0	1	0	0	0	0	0	2	0	2	0	0	0	0	0	0	0	0	2	2	0	9	3	0	6	15	12	6	6	6	5	0	0	0	0	0	0	0	0	0	0	0	0	0	0	0	0	0.045608
ENSG00000235152	0	0	0	0	0	0	0	0	0	0	0	0	0	0	0	0	0	2	0	3	0	3	1	2	0	2	1	0	2	0	1	1	0	0	0	0	0	0	0	0	0	0	0	0	0	0	0	0	0
ENSG00000225826	0	0	0	2	2	0	0	2	0	4	0	2	0	0	0	0	0	0	0	0	0	0	0	0	0	0	0	0	0	0	0	0	0	0	0	0	0	0	0	0	4	2	2	8	6	4	0	0	0
ENSG00000231612	0	0	0	0	0	0	0	0	0	0	2	0	0	0	0	0	0	0	1	2	0	2	3	3	1	0	1	0	1	0	0	0	0	0	0	0	0	0	0	0	0	0	0	0	0	0	0	0	0
ENSG00000237980	23	22	26	12	26	29	29	18	34	21	10	19	17	7	18	10	21	19	0	1	1	4	4	0	0	67	34	28	64	53	36	25	0	1	0	0	0	0	0	0	2	0	0	0	0	0	0.53521	0.57741	0.613408
ENSG00000226235	0	0	0	0	0	0	0	0	0	0	0	0	0	0	0	0	0	0	0	0	1	0	0	0	0	0	0	0	0	0	0	0	0	0	0	0	0	0	0	0	0	0	0	0	0	0	0	0	0
ENSG00000230849	7	4	9	4	9	3	7	3	3	10	0	0	1	0	2	6	0	8	19	10	6	10	8	8	12	13	14	8	11	20	4	10	0	2	0	5	4	8	6	2	9	0	4	2	2	6	0.180729	0.116481	0.235587
ENSG00000170382	1	1	4	4	3	3	5	2	12	7	6	6	0	0	0	0	0	2	6	3	0	4	8	7	7	7	3	0	2	1	1	0	0	0	0	0	0	0	1	1	8	6	10	10	4	7	0.0056804	0.00640684	0.0230366
ENSG00000279401	0	0	0	0	0	0	6	8	6	2	6	2	0	0	0	0	0	0	0	0	0	0	0	0	0	8	6	0	2	7	0	6	0	0	0	0	0	0	0	0	0	0	0	0	0	0	0	0	0
ENSG00000272362	0	0	0	0	0	0	0	0	0	0	0	0	0	0	0	0	0	0	0	0	0	0	0	0	0	0	0	0	0	0	0	0	0	0	0	0	0	0	0	0	0	0	0	0	0	0	0	0	0
ENSG00000287450	2	4	2	5	4	9	14	10	9	6	3	12	2	1	6	1	7	3	12	10	16	7	10	14	8	10	13	16	22	23	11	12	12	21	24	14	11	12	14	2	7	8	7	9	4	6	0.468098	1.05592	0.474588
ENSG00000237011	28	40	34	31	30	37	36	25	29	45	41	42	33	17	50	25	41	38	17	24	29	27	20	9	13	15	15	11	14	19	13	5	98	124	138	150	127	102	90	6	5	8	14	8	10	13	1.06396	1.71432	1.30986
ENSG00000272574	24	29	36	7	21	22	23	47	31	32	35	26	17	10	23	29	19	34	62	64	87	93	102	65	51	97	88	48	93	54	31	38	55	77	78	93	51	68	62	32	11	18	20	18	17	26	1.53499	2.09198	2.33441
ENSG00000233583	2	3	3	1	6	4	8	5	7	4	3	5	2	1	1	2	1	3	3	4	10	8	10	1	2	0	2	0	0	4	0	2	4	3	6	1	7	0	2	11	7	10	17	15	10	28	0.0560743	0.094868	0.0852775
ENSG00000286071	10	15	19	17	18	24	1	21	13	17	10	5	10	13	12	8	10	10	34	39	32	42	28	35	27	24	24	34	30	29	18	9	4	6	3	4	0	0	0	21	16	21	4	14	31	17	0.0195289	0.0330395	0.0376192
ENSG00000066027	704	609	717	541	698	749	781	682	719	707	806	770	932	958	1318	1079	1279	1308	929	996	1056	885	1005	665	577	1024	984	643	940	1028	608	642	965	1034	919	1006	980	898	845	714	1141	947	711	917	938	999	5.76822	5.62797	5.95618
ENSG00000162733	4	6	4	8	5	2	15	4	9	14	11	20	5	12	12	4	16	16	40	55	56	53	50	20	35	26	17	9	16	28	12	27	8	10	5	10	4	14	19	2	20	1	8	2	5	2	0.0116402	0.0196933	0.0118016
ENSG00000286263	0	0	0	0	0	0	0	0	0	0	0	0	0	0	0	4	2	0	0	4	2	3	2	1	0	5	2	2	2	5	1	5	0	0	0	0	0	0	0	0	0	0	0	0	0	0	0	0	0
ENSG00000117477	21	17	10	8	19	8	1	9	12	8	6	9	6	5	12	10	7	11	13	14	6	16	11	9	7	20	21	18	28	22	7	12	12	8	14	4	16	10	14	14	31	19	17	21	25	24	0.171238	0.156349	0.0826724
ENSG00000227006	1	0	0	0	0	0	3	0	0	0	3	3	0	0	0	0	0	0	0	9	4	0	0	0	0	0	0	0	0	0	0	2	0	0	0	0	0	0	0	2	2	3	0	5	5	0	0.0243764	0	0
ENSG00000236372	0	0	0	0	0	0	0	0	0	0	0	0	0	0	0	0	0	0	0	0	0	0	0	0	0	0	0	0	0	0	0	0	2	0	0	0	0	0	0	0	0	0	0	0	0	0	0	0	0
ENSG00000224525	0	0	0	0	0	0	0	0	0	0	0	0	0	0	0	0	0	0	4	2	0	0	2	1	0	0	0	0	0	0	0	0	0	0	0	0	0	0	0	2	0	2	2	1	4	2	0	0	0
ENSG00000188770	0	0	0	0	0	0	0	0	0	0	1	0	0	0	0	0	0	0	0	0	0	0	0	0	0	0	0	0	0	0	0	0	0	0	0	0	0	0	0	0	0	0	0	0	0	0	0	0	0
ENSG00000173728	0	0	0	2	0	0	3	1	5	1	5	1	6	1	2	4	0	6	5	4	7	0	4	1	2	2	6	7	6	2	1	0	9	6	9	14	7	5	4	1	8	5	13	12	11	5	0	0	0
ENSG00000094975	956	811	877	702	874	956	1010	885	1009	1038	1065	1098	722	681	843	769	813	890	1081	1044	1175	1056	1163	820	799	1634	1413	958	1463	1487	1135	1153	1054	1209	1131	1138	1232	1011	1099	840	1189	1228	856	1073	1067	1372	3.91153	3.74261	3.63804
ENSG00000273093	0	2	0	1	0	0	0	0	0	0	0	0	0	0	0	0	0	0	0	0	0	0	0	0	0	0	0	0	0	0	0	0	0	0	0	0	0	0	0	0	0	0	0	0	0	0	0	0.136695	0
ENSG00000162772	3267	2987	3257	2701	3396	3114	3156	2920	3236	3352	3453	3148	2416	2194	2908	2472	2921	3351	95	121	141	116	148	82	67	256	248	178	262	270	194	162	162	233	217	214	267	207	226	63	105	106	76	98	96	76	26.1188	26.9342	26.3999
ENSG00000227818	0	4	0	3	0	2	0	0	0	0	1	0	0	0	0	0	0	0	0	0	0	0	0	0	0	0	0	0	0	0	0	0	0	0	0	0	0	0	0	0	0	0	0	0	0	0	0	0.321672	0
ENSG00000135828	590	467	538	474	533	522	519	489	483	564	585	528	166	168	203	180	206	216	419	383	407	406	421	241	296	547	471	322	507	442	339	345	221	257	225	268	226	246	181	501	678	614	505	615	649	671	3.11123	2.77755	2.87635
ENSG00000224227	0	0	0	0	1	1	0	1	0	2	0	1	0	2	0	2	0	4	0	1	0	0	0	0	3	1	3	0	1	2	2	1	2	2	1	0	5	3	0	6	2	2	0	5	1	8	0	0	0
ENSG00000286398	0	0	0	0	0	0	0	0	0	0	0	0	0	0	0	0	0	0	0	1	0	0	0	0	0	0	0	0	0	0	0	0	0	0	0	0	0	0	0	0	0	0	0	0	0	0	0	0	0
ENSG00000237520	1	1	1	0	1	4	1	1	0	0	1	0	0	2	3	0	2	1	12	16	17	15	12	13	11	19	22	12	14	12	11	9	0	0	0	0	0	0	0	2	0	1	0	0	0	0	0.0763564	0.0861213	0.077415
ENSG00000076356	41	50	51	43	51	52	34	52	22	48	46	42	22	24	27	52	28	32	7	14	15	6	18	10	7	21	23	20	17	9	5	9	12	4	15	22	12	13	6	8	28	27	14	27	16	40	0.0956482	0.131561	0.120627
ENSG00000185523	14	5	8	4	5	9	8	15	2	10	6	0	21	8	18	11	16	11	1	0	0	0	0	1	0	9	6	2	11	8	7	8	2	9	6	2	4	1	3	11	7	8	5	10	7	5	0.893642	0.359973	0.517732
ENSG00000116711	815	679	794	568	799	778	624	616	640	711	748	717	750	806	962	875	884	1077	146	143	166	138	130	124	88	371	279	188	280	332	158	183	157	184	171	137	194	160	173	84	118	91	91	109	118	126	9.14328	8.5917	9.03118
ENSG00000231684	2	1	4	2	2	1	2	2	5	6	1	1	2	3	2	2	4	2	2	3	2	3	5	1	4	2	7	2	1	4	2	0	0	2	1	7	0	0	0	2	2	2	4	4	0	5	0.193406	0.10907	0.392174
ENSG00000226750	0	0	0	0	0	0	0	0	0	0	0	0	0	0	0	0	0	0	0	0	0	0	0	0	0	0	0	0	0	0	0	0	0	0	0	0	0	0	0	0	1	0	3	0	0	2	0	0	0
ENSG00000285665	7	48	13	9	17	18	15	14	17	16	11	22	20	6	4	10	5	16	2	6	3	9	4	26	14	2	25	21	20	3	15	8	14	22	13	19	9	15	7	4	7	1	5	2	14	16	0.342044	2.6454	0.644032
ENSG00000224436	0	0	0	0	0	0	0	0	0	0	0	0	0	0	0	0	0	0	8	11	2	12	13	4	6	6	4	0	6	2	1	0	0	0	0	0	0	0	0	0	0	0	0	0	0	0	0	0	0
ENSG00000228208	5	0	0	0	0	0	0	0	0	0	0	0	0	2	3	0	4	2	0	0	0	0	0	0	0	0	0	0	0	0	0	0	0	0	0	0	0	0	0	0	0	0	0	0	0	0	0.130027	0	0
ENSG00000273384	2	7	5	4	3	7	0	0	0	0	0	0	3	0	5	5	2	8	2	1	0	4	2	2	4	1	10	1	2	1	2	0	0	0	0	0	0	0	0	2	8	6	5	14	9	7	0.111954	0.44195	0.283766
ENSG00000238061	18	36	23	11	34	10	10	7	5	22	5	8	21	25	16	10	22	26	4	10	9	2	12	5	4	11	8	12	5	7	10	2	24	34	10	17	23	28	13	38	41	29	18	23	14	31	0.597511	1.34785	0.774071
ENSG00000243323	2	6	0	2	10	0	5	4	4	1	7	4	3	0	2	3	4	1	1	2	0	0	2	0	0	0	0	0	1	0	0	0	0	2	0	0	0	0	0	0	0	4	2	0	2	0	0.00979344	0.0331376	0
ENSG00000234915	11	3	5	3	2	7	4	4	3	6	6	5	0	2	0	2	5	1	61	59	58	56	37	31	38	86	83	32	81	80	46	39	21	20	28	19	14	17	13	36	27	36	24	42	40	41	0.918053	0.282398	0.423082
ENSG00000143845	0	1	0	0	2	2	9	2	2	0	1	3	0	0	4	1	3	9	6	9	13	9	4	7	2	11	12	6	7	2	7	2	3	4	5	3	2	2	4	9	6	5	6	6	5	5	0	0.00807208	0
ENSG00000235862	0	0	4	0	0	0	0	0	0	0	0	0	0	0	0	0	0	0	0	0	0	0	0	0	0	0	0	0	1	0	0	0	0	0	0	0	0	0	0	0	0	0	0	0	0	0	0	0	0.0588702
ENSG00000069812	2	0	0	0	3	0	9	3	11	4	3	8	7	2	6	6	0	1	0	0	0	0	0	0	0	2	0	0	0	0	0	0	0	0	0	0	0	0	0	0	0	0	0	1	0	0	0.011947	0	0
ENSG00000227585	0	0	0	0	0	0	0	0	0	0	0	0	0	0	0	0	0	0	0	0	0	0	0	0	0	0	0	0	0	0	2	0	0	0	0	0	0	0	0	0	0	0	0	0	0	0	0	0	0
ENSG00000157060	0	0	0	0	0	0	0	2	0	0	0	0	0	0	0	1	0	0	0	0	0	0	0	0	0	0	0	0	0	0	2	0	0	0	0	0	0	0	0	1	4	5	2	0	2	8	0	0	0
ENSG00000237213	0	2	1	2	0	0	0	2	2	2	2	2	0	0	0	0	0	2	0	0	0	0	0	0	0	0	0	0	0	0	1	0	4	7	2	0	3	5	4	2	5	1	0	2	1	0	0	0.160836	0.0722882
ENSG00000236439	30	29	35	16	41	30	20	23	36	35	23	35	39	49	57	39	45	27	37	32	48	45	37	29	24	43	50	46	34	44	32	43	37	71	49	40	58	55	24	63	87	74	103	97	101	95	3.81482	4.15925	4.51232
ENSG00000224260	0	0	0	0	0	0	0	0	0	0	0	0	0	0	0	0	0	0	0	0	0	0	0	0	0	0	0	0	0	0	0	0	0	0	0	0	0	0	0	0	0	0	0	2	2	2	0	0	0
ENSG00000213045	0	0	0	0	0	3	0	0	0	1	0	0	0	0	0	0	0	0	0	0	0	0	0	0	0	0	0	0	0	0	0	0	0	0	0	0	0	0	0	0	0	0	0	0	0	0	0	0	0
ENSG00000009790	2010	1667	1933	1777	2277	2018	1925	1824	1992	1975	2231	2068	967	907	1126	1025	1146	1229	3281	3156	3659	3323	3601	2111	2201	3449	3304	2443	3232	3407	2077	2142	4697	5242	4819	5430	5642	4529	4605	6449	8788	8249	6995	7994	8137	8823	8.37684	7.83582	8.16762
ENSG00000230063	12	7	8	9	13	2	19	37	24	38	32	36	0	5	3	2	0	6	173	194	208	203	197	137	108	7	10	6	2	9	7	3	11	4	7	1	8	4	4	50	88	86	75	87	81	96	0.596285	0.392316	0.403034
ENSG00000116698	774	708	765	634	782	740	708	803	779	964	998	868	624	562	780	649	708	798	1259	1208	1157	1113	1361	847	746	1649	1512	1004	1412	1557	994	964	840	885	834	826	1005	854	803	782	1143	1062	842	1070	998	1105	3.0058	3.10111	3.01204
ENSG00000162813	577	564	493	397	530	500	515	585	586	689	609	550	310	267	377	360	318	436	121	181	171	111	131	119	98	224	220	120	183	191	127	106	405	452	445	439	442	389	366	303	406	409	269	353	432	525	5.98663	6.6001	5.18601
ENSG00000231871	5	0	3	8	4	8	2	0	3	1	0	3	0	2	2	0	3	1	1	6	3	2	0	0	3	6	0	0	1	7	0	3	2	3	3	1	1	2	0	0	4	4	2	6	6	4	0.126761	0	0.0771112
ENSG00000123684	1047	993	1037	908	1134	1075	854	901	884	916	1099	930	881	843	980	1000	1144	1135	528	486	587	488	596	355	394	563	548	360	537	483	366	330	738	724	711	698	783	766	789	476	696	680	511	672	700	766	3.84719	4.11539	3.86327
ENSG00000117707	0	0	0	0	0	0	0	0	0	0	2	0	0	0	0	0	0	0	0	3	5	4	2	3	4	0	2	4	2	0	0	2	0	0	0	0	0	0	0	4	11	6	4	7	9	13	0	0	0
ENSG00000228044	0	0	2	0	0	0	0	0	0	0	0	2	0	0	0	0	0	0	5	6	7	14	8	8	8	18	16	14	21	25	8	16	0	0	0	0	0	0	0	1	0	2	0	2	0	1	0	0	0.0268304
ENSG00000225338	5	2	5	2	0	3	2	0	8	5	9	7	4	0	1	0	2	0	27	19	25	30	52	18	18	51	32	26	23	25	30	17	18	16	8	18	24	11	26	17	15	19	17	12	16	18	0.345072	0.155681	0.349856
ENSG00000237457	0	0	0	0	0	0	0	0	0	0	0	0	0	0	0	0	0	0	2	2	1	0	1	0	1	0	2	0	0	0	2	0	0	0	0	0	0	0	0	0	0	0	0	0	0	0	0	0	0
ENSG00000230630	26	19	14	15	23	13	8	37	21	39	29	21	11	9	19	17	10	10	15	14	16	11	17	10	3	2	14	10	10	19	7	2	18	26	25	28	20	12	7	15	5	9	3	17	6	8	0.262838	0.216637	0.14349
ENSG00000225171	43	24	50	29	34	23	25	42	27	44	35	53	11	7	24	20	32	35	29	19	11	26	37	11	16	29	37	26	22	22	19	9	77	71	59	75	57	43	65	38	70	46	48	39	60	64	3.00616	1.89243	3.544
ENSG00000196482	0	0	0	0	0	0	0	1	0	0	0	0	0	0	0	0	0	0	0	0	1	0	4	0	0	0	0	0	0	0	2	0	0	0	0	0	0	0	0	0	0	0	0	0	0	0	0	0	0
ENSG00000123836	3825	3350	3796	3039	4016	3685	3141	3055	3170	3207	3433	3335	6073	6144	7396	6701	7550	8072	2079	2181	2424	2236	2457	1596	1482	1800	1734	1220	1606	1687	980	882	1519	1662	1611	1755	1673	1395	1459	2704	3696	3421	2824	3151	3219	3766	12.1406	11.9927	12.2156
ENSG00000229832	17	8	21	8	8	11	17	6	7	30	21	24	3	5	3	11	9	8	14	25	30	18	35	6	7	53	43	17	53	42	26	20	167	184	188	215	196	174	175	72	109	107	71	105	90	105	1.10701	0.587569	1.38645
ENSG00000117691	153	148	154	162	196	152	109	123	142	143	144	125	153	159	250	174	216	271	69	66	73	67	92	32	39	40	57	44	56	47	50	42	90	87	98	91	101	108	73	70	108	85	45	55	70	88	3.90958	4.26546	3.98969
ENSG00000118873	2336	2035	2347	1848	2351	2309	3394	3163	3468	3710	3705	3597	1372	1333	1636	1393	1627	1736	2721	2780	3220	2859	3153	2020	1995	3681	3246	2144	3408	3518	2085	1999	2303	2544	2457	2278	2601	2173	2153	3158	4152	3961	3247	3692	3762	4292	7.29478	7.16752	7.43074
ENSG00000237514	0	0	0	0	0	0	0	0	0	0	0	0	0	0	0	0	0	0	2	0	0	0	0	1	0	0	0	0	0	0	0	0	0	0	0	0	0	0	0	0	0	0	0	0	0	0	0	0	0
ENSG00000287856	0	0	0	2	0	0	0	0	0	0	0	0	0	0	0	0	0	0	0	0	0	0	0	0	0	2	0	0	0	0	0	0	1	0	0	0	0	0	0	0	0	0	0	0	0	0	0	0	0
ENSG00000230739	0	0	0	0	0	0	0	0	0	0	0	0	0	0	0	0	0	0	0	0	0	0	0	0	0	0	0	0	0	0	0	1	0	2	1	4	3	0	3	0	0	2	0	2	0	4	0	0	0
ENSG00000198468	167	196	214	157	161	238	162	193	190	205	179	152	90	124	122	133	167	170	84	102	91	86	92	51	38	259	203	156	190	237	160	141	537	659	618	688	732	544	476	421	532	515	451	508	496	535	1.26321	1.67216	1.64116
ENSG00000228067	10	6	6	12	0	6	8	6	3	26	7	10	4	0	3	4	5	0	6	4	10	13	23	7	9	6	21	10	21	16	7	6	0	0	0	0	0	0	2	0	0	0	0	0	0	0	0.972854	0.658361	0.591805
ENSG00000226375	0	3	0	0	2	0	0	0	0	0	0	0	0	0	0	0	0	0	4	0	1	0	1	0	1	0	1	1	3	2	1	4	1	0	3	1	0	1	1	0	0	2	0	0	0	0	0	0.158388	0
ENSG00000203705	2120	1975	2031	1714	2436	2136	1729	1573	1751	2032	2067	1815	2270	2035	2836	2426	2834	3229	1061	1012	1235	954	1130	767	680	1364	1163	815	1128	1183	884	999	1097	1145	1096	1064	1152	990	1029	1302	1775	1556	1295	1442	1635	1801	17.1527	18.023	16.6604
ENSG00000224040	0	0	0	0	1	0	0	0	0	4	0	1	0	0	2	0	2	2	0	0	4	2	0	0	0	0	0	0	0	0	0	0	1	0	3	0	0	0	0	2	2	2	3	0	0	0	0	0	0
ENSG00000228686	5	9	3	1	9	0	18	9	23	12	16	12	5	1	5	3	2	6	2	13	8	3	6	4	7	19	16	5	16	17	13	5	8	17	7	22	10	16	20	21	17	10	9	6	20	14	0.256747	0.521246	0.156184
ENSG00000279838	242	184	220	191	247	194	257	256	265	301	278	257	401	339	405	380	447	468	484	462	453	442	485	302	288	361	293	224	323	341	209	227	499	687	586	651	595	580	544	308	419	388	341	343	431	359	3.92976	3.37003	3.62204
ENSG00000227860	0	0	0	0	0	0	0	0	0	0	0	0	0	0	0	0	0	0	0	0	0	0	0	0	0	0	0	0	0	0	2	0	0	0	0	0	0	0	0	0	0	0	0	0	0	0	0	0	0
ENSG00000286198	0	0	0	0	0	0	0	0	0	0	0	0	0	0	0	0	0	0	0	0	2	0	0	2	0	0	0	0	0	0	0	0	0	0	0	0	0	0	0	0	0	0	0	0	0	0	0	0	0
ENSG00000174175	42	22	36	23	27	29	30	22	36	28	17	37	10	2	8	10	12	9	487	549	599	484	582	369	305	906	886	582	886	918	544	581	16	22	30	28	17	7	25	67	95	68	66	102	75	125	0.388696	0.22964	0.337787
ENSG00000241475	0	0	0	0	0	0	0	0	0	0	0	0	0	0	0	0	0	0	0	0	0	2	0	0	0	0	2	0	0	0	0	0	0	0	0	0	0	0	0	0	0	0	0	0	0	0	0	0	0
ENSG00000081237	19052	17077	19156	15557	20341	18394	17443	16818	17786	18757	19801	18127	11858	11877	14398	12520	14364	15319	32826	34627	37755	33280	38085	24082	22737	44337	40751	27208	39144	41382	24988	23631	44789	51337	46911	47055	51972	46086	44122	34119	47243	43988	34542	40475	42685	48542	67.12	67.8559	68.422
ENSG00000286421	0	0	0	0	0	0	0	0	0	0	0	0	0	0	0	0	0	0	0	0	0	0	0	0	0	0	0	0	0	0	0	0	0	0	0	0	0	0	0	0	4	2	2	4	2	4	0	0	0
ENSG00000270936	0	0	0	0	0	0	0	0	0	0	0	0	0	0	0	0	0	0	0	0	0	0	0	0	0	0	0	0	0	0	0	0	0	0	0	0	0	0	0	0	0	0	0	0	0	0	0	0	0
ENSG00000008118	81	70	70	68	107	101	60	68	66	58	99	62	14	35	23	24	26	21	30	22	27	23	35	32	17	53	35	28	39	50	23	23	1	0	1	0	0	0	0	7	5	6	6	0	6	8	0.786118	0.766241	0.68878
ENSG00000171161	422	324	300	276	450	388	246	245	297	288	286	250	274	250	328	323	313	387	145	176	181	171	145	113	108	240	176	173	213	240	126	106	216	225	250	255	260	192	152	168	178	175	133	161	135	241	3.64343	3.15506	2.62603
ENSG00000117143	745	608	760	610	799	715	594	608	714	730	662	618	608	612	751	655	726	743	1258	1312	1381	1110	1360	955	873	1393	1158	780	1264	1286	799	827	1699	1849	1727	1900	1932	1904	1772	460	701	639	541	580	642	744	7.00104	6.44429	7.24102
ENSG00000152332	2337	2129	2426	1863	2555	2351	2365	2430	2575	2588	2901	2405	1749	1638	2294	1971	2126	2327	1265	1392	1526	1335	1546	1002	963	1536	1452	887	1338	1428	872	1068	1466	1628	1479	1527	1863	1623	1683	1568	2129	2007	1601	1939	2035	2307	8.16201	8.38646	8.5903
ENSG00000224535	0	0	0	0	0	0	0	0	0	0	0	0	0	0	0	0	0	0	0	0	0	0	0	0	1	0	0	0	0	0	0	0	0	0	0	0	0	0	0	0	0	0	0	0	0	0	0	0	0
ENSG00000282097	0	0	0	0	1	0	0	0	0	0	0	0	0	0	0	0	0	0	0	0	0	0	0	0	0	0	0	0	0	0	0	0	0	0	0	0	0	0	0	0	0	0	0	0	0	0	0	0	0
ENSG00000261453	0	0	2	0	0	0	0	0	0	0	0	0	0	0	0	0	0	0	0	0	0	0	0	0	0	0	0	0	0	0	0	0	0	0	0	0	0	0	0	0	0	0	0	0	0	0	0	0	0.0273002
ENSG00000273062	0	0	0	4	0	5	6	0	4	2	5	2	0	0	0	0	0	0	2	2	0	0	0	0	1	0	1	0	0	0	4	6	0	2	0	0	0	0	0	0	0	0	0	0	0	0	0	0	0
ENSG00000162757	195	124	173	134	167	137	139	147	143	149	166	172	87	108	134	91	107	112	50	35	58	50	43	25	26	51	68	14	49	44	25	50	101	104	91	101	126	103	101	99	174	117	106	121	127	155	1.34463	0.964396	1.20947
ENSG00000196878	68	95	89	89	103	89	90	103	113	135	128	100	41	57	82	43	87	71	154	165	210	228	236	131	144	249	230	164	237	226	140	159	40	22	27	17	24	31	14	6	28	14	22	19	18	16	0.472631	0.744735	0.627167
ENSG00000133059	1345	1267	1298	1107	1427	1143	1760	1664	1946	1809	1904	1900	632	609	807	657	794	865	1982	1868	2268	2017	2291	1199	1322	2043	2058	1445	2046	2306	1296	1405	1305	1379	1304	1386	1433	1203	1201	1760	2369	2248	1906	2152	2298	2634	5.12588	5.44613	5.01534
ENSG00000186007	0	0	0	0	0	0	0	0	0	0	0	0	0	0	0	0	0	0	1	0	2	3	2	6	0	0	0	0	0	0	0	0	6	4	0	4	4	0	2	0	4	0	0	0	2	1	0	0	0
ENSG00000270585	0	3	0	0	2	1	2	0	0	0	4	0	0	0	0	0	0	0	9	6	8	19	9	10	4	10	4	0	6	10	3	5	3	13	4	10	4	5	4	12	10	7	14	12	18	18	0	0.164343	0
ENSG00000224668	0	0	0	0	0	0	0	0	0	0	0	0	0	0	0	0	0	0	0	0	0	0	0	0	0	0	0	0	0	0	0	0	0	0	0	0	0	0	0	0	0	0	0	0	0	0	0	0	0
ENSG00000260805	28	47	49	17	56	45	40	41	27	29	41	34	20	42	68	37	30	65	11	21	25	19	23	19	21	76	52	31	53	53	24	25	5	0	4	2	7	2	4	2	2	4	0	6	4	0	0.476233	0.90162	0.844961
ENSG00000203721	66	61	58	51	58	67	88	83	109	100	82	112	34	45	27	35	51	25	162	132	146	119	158	100	72	64	41	43	60	38	31	19	64	112	95	55	101	73	78	45	44	71	43	48	62	65	0.602862	0.628447	0.537132
ENSG00000074964	242	219	246	180	256	288	216	226	226	228	223	186	217	196	259	240	280	257	21	14	19	4	15	10	11	26	23	16	30	35	9	16	137	123	128	124	132	83	80	10	15	29	19	17	18	32	0.982688	1.00302	1.01278
ENSG00000116918	2301	2184	2221	1763	2487	2023	2149	2047	2258	2671	2685	2327	1297	1302	1558	1255	1329	1545	1718	1723	1631	1573	1825	1134	1110	1859	1716	1092	1638	1631	1101	1243	1356	1605	1533	1380	1641	1515	1485	2264	3140	2936	2297	2688	2880	3228	11.6983	12.5235	11.4481
ENSG00000227141	0	0	0	0	0	0	0	0	0	0	0	0	0	0	0	0	0	0	0	2	0	0	0	0	0	0	0	0	0	0	0	0	0	0	0	0	0	0	0	0	0	0	0	0	0	0	0	0	0
ENSG00000285053	43	27	29	33	23	26	39	17	38	39	30	26	5	12	19	21	16	26	22	17	21	16	32	20	15	26	23	17	28	25	26	16	36	32	34	41	40	39	53	37	35	57	21	39	48	28	0.26791	0.189736	0.183189
ENSG00000274020	225	200	213	165	235	233	289	288	283	274	320	309	124	128	196	180	145	200	148	172	228	174	191	144	121	310	269	145	219	266	185	167	595	662	572	641	686	666	578	790	1055	1084	818	911	1006	1112	0.93686	0.939263	0.89919
ENSG00000231767	4	6	2	6	3	3	5	3	5	5	3	4	2	6	8	2	8	6	2	10	10	6	8	6	5	18	9	6	14	3	2	5	10	7	7	10	8	5	6	5	14	20	7	10	17	6	0.2475	0.418728	0.125466
ENSG00000287445	40	26	26	35	28	40	25	33	39	29	33	37	30	29	32	31	47	47	1	19	30	16	18	22	19	5	3	10	15	16	7	17	16	11	10	7	4	14	11	2	0	3	0	4	0	2	0.74809	0.548443	0.493
ENSG00000235121	7	8	10	0	7	0	4	0	3	9	9	3	10	5	6	4	2	4	0	0	0	0	0	0	0	13	1	0	16	9	1	7	2	5	2	8	4	10	2	0	0	0	0	0	0	0	0.124981	0.161102	0.18102
ENSG00000227591	34	27	28	28	34	39	19	19	24	30	27	45	7	4	7	15	11	16	50	30	39	30	48	16	23	45	50	26	33	68	22	23	21	25	27	33	32	25	45	22	31	21	28	33	35	22	2.30222	2.06204	1.92223
ENSG00000240963	0	0	0	0	0	0	0	0	0	1	0	3	1	1	3	0	1	1	1	0	0	0	2	4	3	1	4	0	6	1	0	2	7	11	10	3	6	3	4	2	3	2	0	6	2	1	0	0	0
ENSG00000226570	0	0	0	0	0	0	0	0	0	0	0	0	2	0	2	2	0	3	0	0	0	0	0	0	0	0	0	0	0	0	0	0	0	0	0	0	0	0	0	0	0	0	0	0	0	0	0	0	0
ENSG00000198929	0	0	0	0	0	0	4	5	3	0	0	2	0	0	0	0	0	0	0	3	6	5	0	4	2	0	0	0	0	0	2	0	0	0	0	0	0	0	0	1	0	0	0	0	0	0	0	0	0
ENSG00000287336	29	32	24	8	26	23	15	28	32	38	44	20	16	29	38	21	25	39	200	149	178	123	126	111	89	52	29	21	30	39	13	24	141	173	123	173	172	172	161	75	92	105	71	127	89	112	0.407422	0.507063	0.341852
ENSG00000230628	0	0	0	0	0	0	16	12	1	18	12	8	0	0	0	0	0	0	5	12	2	9	9	6	4	0	0	0	0	0	0	0	0	0	0	0	0	0	0	0	0	0	0	0	0	0	0	0	0
ENSG00000162771	1	1	0	3	0	0	0	0	0	1	0	0	0	0	0	0	0	0	0	0	0	0	0	0	0	0	3	0	1	0	0	0	0	0	0	0	0	0	0	0	0	0	0	0	0	0	0.0140307	0.0158251	0
ENSG00000227579	0	0	0	0	0	0	0	0	0	0	0	0	0	0	0	0	0	0	0	1	0	0	0	1	0	0	0	0	0	0	0	0	0	0	0	0	0	0	0	0	0	0	0	0	0	0	0	0	0
ENSG00000237292	7	9	13	4	2	7	5	3	3	0	7	5	4	1	3	1	2	6	0	3	1	1	8	2	2	3	4	0	0	0	2	0	0	0	0	0	0	2	0	0	6	1	0	6	4	2	0.338968	0.49155	0.638239
ENSG00000176393	625	531	622	562	620	609	628	595	528	612	597	627	438	416	507	533	500	606	164	134	159	108	162	82	78	258	207	185	251	247	165	151	230	212	244	263	265	265	214	194	207	234	260	221	244	243	5.84276	5.59883	5.89533
ENSG00000174606	1974	1814	1921	1704	2093	2009	1717	1606	1843	2079	2009	1945	1561	1509	2013	1713	2008	2073	2269	2370	2441	2226	2590	1715	1582	2740	2671	1808	2643	2719	1734	1742	1875	2078	1931	1979	2175	1899	2004	1708	2244	2232	1690	1996	2186	2597	8.71365	9.0314	8.59726
ENSG00000179914	3	13	3	4	4	6	10	0	2	5	1	0	6	8	0	2	4	9	2	2	4	3	4	6	0	2	0	2	0	2	0	0	0	0	0	0	0	0	0	0	0	0	0	0	0	0	0.0649439	0.317413	0.0658443
ENSG00000235750	651	507	682	516	649	621	677	719	674	753	814	782	276	243	368	302	336	314	385	382	434	332	429	255	260	941	901	659	879	957	665	589	680	788	764	816	813	668	637	506	715	689	529	596	599	710	4.41085	3.87448	4.68495
ENSG00000284376	0	0	0	0	0	0	0	0	0	0	0	0	0	0	0	0	0	0	0	2	0	0	0	0	0	0	0	0	6	2	2	0	0	0	0	0	0	0	0	0	0	0	0	0	0	0	0	0	0
ENSG00000234996	12	17	15	13	11	16	5	8	17	4	10	7	28	29	45	29	33	41	17	21	29	28	35	19	10	36	39	29	35	41	15	17	38	53	37	28	45	28	31	14	21	29	16	21	14	14	0.166991	0.266824	0.211632
ENSG00000121446	0	0	0	4	1	0	0	0	0	0	2	0	0	0	0	0	0	4	2	2	1	3	0	0	0	0	0	0	1	1	1	1	0	7	0	5	0	3	1	5	5	3	2	1	5	3	0	0	0
ENSG00000123689	71689	62539	71301	58268	75552	70598	54195	51429	55556	59932	61052	57126	24638	22993	29810	26167	29788	30410	78550	78242	91669	82523	87222	53509	50469	115304	108549	75462	112766	113643	69570	78052	3516	4035	3785	3905	4264	3201	3054	1854	2682	2562	2128	2224	2252	2359	2643.23	2600.74	2665.37
ENSG00000226758	3	0	4	8	3	2	3	0	3	2	5	4	0	0	0	0	0	0	7	3	9	1	1	5	1	1	7	1	16	4	8	4	2	0	0	0	0	0	0	4	9	7	8	6	12	6	0.127161	0	0.171898
ENSG00000230199	0	0	0	0	0	0	0	0	0	0	0	0	0	0	0	0	2	0	0	0	0	0	0	0	0	0	2	2	0	0	0	0	0	0	0	0	0	0	0	0	2	0	0	0	0	0	0	0	0
ENSG00000236905	3	2	1	3	0	1	1	2	0	3	1	5	0	0	0	0	0	0	2	0	0	0	0	0	0	4	2	5	2	4	1	0	2	5	4	3	4	2	4	2	7	3	0	2	0	1	0.202289	0.152106	0.0683644
ENSG00000233304	2	2	0	4	0	6	0	0	0	0	0	0	0	0	0	0	0	0	2	0	0	0	0	0	0	0	0	0	0	0	0	0	0	0	0	0	0	0	0	0	0	0	0	0	0	0	0.0127815	0.014416	0
ENSG00000288007	8	4	4	7	19	6	4	4	4	0	4	1	7	2	5	9	4	1	2	2	0	2	1	0	0	8	19	3	8	10	11	8	0	0	0	0	0	0	0	1	0	0	0	6	2	2	0.164475	0.0927544	0.0833776
ENSG00000227887	1	0	0	0	0	0	0	0	0	0	0	1	1	0	0	0	1	0	0	0	0	0	0	0	0	0	0	1	0	0	0	0	2	4	1	0	0	0	0	0	0	0	0	1	0	1	0.0978751	0	0
ENSG00000223396	72	51	57	57	71	60	84	55	100	92	78	87	39	67	59	46	60	76	53	61	79	68	69	37	55	178	238	115	135	177	103	121	61	33	40	61	34	42	35	145	208	172	178	149	189	267	0.770547	0.615604	0.618474
ENSG00000116903	680	571	639	468	666	603	556	537	521	622	605	622	601	680	808	738	746	864	322	341	337	315	350	249	179	406	310	225	326	443	234	212	429	556	476	523	525	407	446	311	427	431	329	403	423	442	4.3065	4.07865	4.10295
ENSG00000118194	3	3	9	6	11	11	2	7	17	15	26	7	1	10	1	8	3	5	1	1	4	0	0	6	0	3	4	2	7	5	6	0	0	0	0	0	0	0	0	0	0	2	0	0	0	0	0.0131975	0.0148853	0.0401415
ENSG00000281406	0	0	0	0	0	0	0	0	0	0	0	0	0	0	0	0	0	0	0	0	0	0	0	0	0	0	0	0	0	0	0	0	0	0	0	0	0	0	0	1	2	2	0	0	0	0	0	0	0
ENSG00000237845	0	0	0	0	0	0	0	0	0	0	0	0	0	0	0	0	0	0	0	0	0	0	0	0	0	0	2	10	6	2	0	1	0	0	0	0	0	0	0	0	0	0	0	0	0	0	0	0	0
ENSG00000270708	0	0	2	0	0	0	0	0	0	0	0	0	0	0	0	0	0	0	0	0	0	0	0	0	0	0	0	0	0	0	0	0	0	0	0	0	0	0	0	0	1	0	0	2	0	0	0	0	0.216149
ENSG00000226196	0	0	0	0	0	0	0	0	0	0	0	0	0	0	0	0	0	0	0	0	0	0	0	0	2	1	0	0	0	0	0	0	0	0	0	0	0	0	0	0	0	0	0	0	0	0	0	0	0
ENSG00000143333	1303	1017	1141	981	1278	1183	1070	1067	1101	1193	1316	1112	1164	1111	1419	1200	1353	1518	1335	1174	1252	1238	1456	829	767	717	657	530	694	681	466	457	2261	2466	2339	2480	2671	2097	1972	425	489	514	393	479	387	571	17.4773	15.3856	15.5165
ENSG00000285910	0	0	0	0	0	0	0	0	0	0	0	0	0	0	0	0	0	0	0	0	0	0	0	0	0	0	0	0	0	0	0	0	0	0	0	0	0	0	0	0	0	0	0	0	0	0	0	0	0
ENSG00000287354	6	3	0	0	2	6	0	2	5	0	0	8	0	0	0	0	0	0	0	0	2	0	2	0	2	2	4	0	2	7	7	2	0	0	0	0	0	0	0	8	8	2	2	12	4	12	0.0780478	0.0440145	0
ENSG00000233827	0	0	0	0	0	0	0	0	0	0	0	0	0	0	0	0	0	0	0	0	0	0	0	0	0	0	0	0	0	0	0	0	0	0	0	0	0	0	0	3	7	0	2	5	5	9	0	0	0
ENSG00000198626	8	6	5	4	6	6	3	7	8	5	2	3	0	0	0	0	0	0	123	92	93	117	111	89	73	148	122	131	162	157	98	86	0	0	0	0	0	0	0	0	1	0	0	0	0	0	0.0144716	0.0122417	0.00917013
ENSG00000198797	0	0	0	0	0	0	0	0	0	0	0	0	0	0	0	0	0	0	0	0	2	6	1	1	0	0	0	0	0	0	0	0	0	0	0	0	0	0	0	0	0	0	0	0	0	0	0	0	0
ENSG00000271746	0	4	0	2	6	0	2	0	0	0	2	0	0	0	0	0	0	0	2	6	0	4	2	0	3	2	0	2	0	0	0	0	0	0	2	0	0	0	0	3	14	7	4	13	8	4	0	0.174095	0
ENSG00000151414	1265	1129	1251	970	1307	1216	1037	1043	1156	1246	1250	1195	1231	1228	1416	1246	1473	1588	1739	1619	1871	1658	1896	1294	1245	1735	1562	1072	1528	1714	1090	926	2124	2533	2332	2322	2561	2345	2343	931	1428	1358	965	1234	1161	1611	7.49137	7.54101	7.51117
ENSG00000177614	10	12	4	11	10	12	6	5	0	6	6	14	10	6	11	8	12	14	8	3	8	9	4	6	4	3	1	0	2	3	0	0	0	0	0	0	0	0	0	0	2	0	0	3	2	0	0.0286922	0.0388338	0.011636
ENSG00000223794	0	0	0	0	0	0	0	0	0	0	0	0	0	0	0	0	0	0	0	0	2	6	1	3	1	2	0	3	4	2	0	0	0	0	0	0	0	0	0	0	0	0	0	0	0	0	0	0	0
ENSG00000213041	0	0	0	0	0	0	0	0	0	2	2	0	0	0	0	0	0	0	4	1	3	2	0	0	0	0	0	0	1	0	2	0	1	0	0	0	0	0	2	0	1	7	0	2	3	6	0	0	0
ENSG00000287157	0	0	0	0	0	0	0	0	0	0	0	0	0	0	0	0	0	0	0	0	0	2	0	0	0	0	0	0	0	0	0	0	0	0	0	0	0	0	0	0	0	0	0	0	0	0	0	0	0
ENSG00000233920	0	0	0	0	0	0	0	0	0	0	0	0	0	0	0	0	0	0	2	2	0	0	0	2	0	0	4	0	0	0	0	0	0	0	0	0	0	0	0	0	0	0	0	0	0	0	0	0	0
ENSG00000183831	0	0	0	0	0	0	8	6	2	2	4	6	0	0	0	0	0	0	0	0	0	3	2	4	2	11	2	1	1	5	0	2	0	0	0	0	0	0	0	0	0	2	0	0	2	3	0	0	0
ENSG00000225755	0	0	0	0	0	0	0	0	0	0	0	0	0	0	0	0	0	0	8	3	4	0	4	0	3	0	3	4	1	0	2	0	2	2	6	13	9	7	8	5	4	5	4	18	6	8	0	0	0
ENSG00000143858	23	15	26	13	22	26	33	30	26	24	24	31	22	7	9	8	13	19	11	11	15	14	12	4	9	8	21	4	6	10	4	5	22	12	13	24	28	13	19	37	41	25	49	65	30	59	0.0951058	0.0699577	0.109001
ENSG00000197472	0	0	0	0	0	0	0	0	0	0	0	0	0	0	0	2	0	0	0	0	0	0	0	0	0	0	0	0	0	0	0	0	0	0	0	0	0	0	0	0	0	0	0	0	1	0	0	0	0
ENSG00000230184	0	1	0	0	1	2	1	1	6	0	1	1	3	4	2	1	1	3	7	10	11	13	15	3	2	5	6	2	7	7	7	1	2	0	1	0	0	3	1	4	11	13	7	8	6	10	0	0.100912	0
ENSG00000234004	6	0	3	1	3	1	2	3	2	1	3	5	3	4	6	4	6	9	3	9	3	8	8	5	3	9	10	2	6	10	1	3	6	3	4	2	2	1	5	1	14	3	9	9	8	2	0.535339	0	0.27138
ENSG00000188585	4	6	4	7	6	3	13	2	2	3	4	1	4	1	4	1	0	0	0	0	0	4	0	0	0	2	3	7	1	3	1	0	8	2	1	0	5	3	2	4	3	7	6	7	4	2	0.0383596	0.0648978	0.0388914
ENSG00000230019	0	0	0	0	0	0	0	0	0	0	0	0	0	0	0	0	0	0	0	0	0	0	0	0	0	0	2	0	0	0	0	0	0	0	0	0	0	0	0	0	0	0	0	0	0	0	0	0	0
ENSG00000136643	396	391	382	332	469	493	460	445	490	526	539	505	250	289	315	263	329	343	305	316	350	297	335	195	208	561	450	360	454	496	321	359	386	363	303	413	468	358	322	362	446	438	340	353	409	504	2.06595	2.30074	2.02054
ENSG00000218283	1001	818	963	759	1014	852	727	899	811	927	886	888	1004	882	1216	940	1134	1359	2137	2276	2410	2124	2322	1666	1435	2410	2233	1574	2106	2260	1464	1654	1379	1539	1458	1453	1580	1276	1237	1405	2111	1943	1626	1618	1822	1933	33.4344	30.8161	32.6111
ENSG00000226036	1	2	0	0	0	0	2	0	1	3	2	0	0	0	0	0	0	0	0	0	0	0	0	0	0	0	0	0	0	0	2	0	0	0	0	0	1	0	0	0	0	0	0	0	0	0	0.0702147	0.158388	0
ENSG00000285521	0	0	0	0	0	0	6	3	0	8	12	6	0	1	0	0	0	0	6	5	6	4	6	3	5	5	6	0	13	2	2	4	5	8	4	8	7	8	4	4	4	5	0	3	2	6	0	0	0
ENSG00000287343	0	0	0	0	0	0	0	0	0	0	0	0	0	0	0	0	0	0	0	0	2	0	0	0	0	0	0	0	0	0	0	0	0	0	0	0	0	0	0	0	0	0	0	0	0	0	0	0	0
ENSG00000236741	0	0	0	0	0	0	5	0	0	0	1	0	6	4	8	8	8	4	3	0	0	2	2	0	0	4	3	0	0	3	2	2	0	0	0	0	0	0	0	2	6	0	2	0	0	2	0	0	0
ENSG00000236317	0	0	2	0	0	0	0	0	0	0	0	0	0	0	0	1	0	2	0	0	0	0	0	0	0	0	0	0	0	2	0	0	0	0	0	0	0	0	0	0	0	0	0	0	0	0	0	0	0.34111
ENSG00000227962	0	0	2	1	0	2	4	0	0	0	6	4	0	0	0	0	0	0	11	3	4	5	4	2	0	3	2	2	3	2	1	2	2	5	0	6	2	12	4	3	2	6	0	0	2	5	0	0	0.232245
ENSG00000227728	0	0	0	0	0	0	0	0	0	0	0	0	0	0	0	0	0	0	0	0	0	0	0	0	0	2	0	0	0	0	0	0	0	0	0	0	0	0	0	0	0	0	0	0	0	0	0	0	0
ENSG00000133069	13	9	8	14	17	16	12	19	15	13	13	19	3	1	7	5	8	12	17	23	18	31	27	21	11	27	15	16	32	25	22	23	44	22	23	26	27	33	23	18	21	22	25	11	8	24	0.0721202	0.0563146	0.044997
ENSG00000162877	17	26	16	29	14	32	42	42	29	28	13	32	4	2	1	8	1	3	14	12	35	29	25	5	16	43	24	26	28	31	24	39	12	15	7	3	4	21	11	18	22	25	33	27	25	50	0.210295	0.362758	0.200668
ENSG00000233461	179	150	166	126	211	175	119	134	134	176	181	125	60	82	117	113	141	106	56	47	59	73	59	24	44	115	109	68	108	144	77	89	131	173	162	156	185	134	153	36	85	50	32	69	97	78	1.29282	1.22191	1.21555
ENSG00000261504	0	0	0	0	0	2	0	0	3	1	2	0	0	0	0	0	0	0	11	9	0	7	4	0	3	2	10	6	8	20	2	8	0	3	6	2	2	2	8	0	0	0	0	0	0	0	0	0	0
ENSG00000225401	7	10	8	0	3	0	7	0	5	5	5	8	2	1	3	5	1	2	12	10	19	15	8	13	6	14	8	4	3	19	1	10	27	9	15	14	12	13	8	1	1	16	1	7	8	12	0.33006	0.531815	0.382441
ENSG00000135747	2	0	0	0	0	0	2	0	0	0	0	4	0	0	0	0	0	0	0	0	0	2	0	0	0	0	3	0	0	0	0	0	1	3	2	1	6	0	2	0	0	0	0	0	0	0	0.0202057	0	0
ENSG00000227237	3	0	0	0	0	2	2	3	0	0	2	2	0	2	4	4	0	1	0	0	0	0	0	0	0	0	2	0	3	4	1	1	0	0	4	0	0	1	1	0	5	2	0	2	0	1	0.209732	0	0
[truncated: 42,562 more rows]
[truncated: 45 more columns]
